# Supplementary material for: Identification of Disease Resistance Parents and Genome-Wide Association Mapping of Resistance in Spring Wheat
Source: MDPI journal article supplement (doi:10.3390/plants11212905), 2022-10-28
Supplement: s1 [file s1]

**Table S7.** Analysis of Variance (ANOVA) comparing disease severity of **selected and unselected genotypes** at each of the 37 QTLs identified using genome-wide association analysis. Disease resistant genotypes were selected based on the restricted linear phenotypic selection index (RLPSI) and the overall disease severity recorded in all combined environments.

#### A) Comparisons at the five stripe rust QTLs

##### *QYr.dms-1B*

| Source                | DF  | Sum of Squares | Mean Square | F Ratio | Prob > F |
|-----------------------|-----|----------------|-------------|---------|----------|
| Selection using RLPSI | 1   | 82.76075       | 82.7608     | 28.8467 | <0.001   |
| Error                 | 194 | 556.58312      | 2.8690      |         |          |
| Total                 | 195 | 639.34388      |             |         |          |

Comparison of mean disease severity of genotypes selected based on RLPSI (Yes) with unselected ones (No)

| Selected | Number | Mean    | Std Error | Lower 95% | Upper 95% |
|----------|--------|---------|-----------|-----------|-----------|
| No       | 174    | 3.99943 | 0.12841   | 3.7462    | 4.2527    |
| Yes      | 22     | 1.94091 | 0.36112   | 1.2287    | 2.6531    |

##### *QYr.dms-2B*

| Source                | DF  | Sum of Squares | Mean Square | F Ratio | Prob > F |
|-----------------------|-----|----------------|-------------|---------|----------|
| Selection using RLPSI | 1   | 82.76075       | 82.7608     | 28.8467 | <0.001   |
| Error                 | 194 | 556.58312      | 2.8690      |         |          |
| Total                 | 195 | 639.34388      |             |         |          |

Comparison of mean disease severity of genotypes selected based on RLPSI (Yes) with unselected ones (No)

| Selected | Number | Mean    | Std Error | Lower 95% | Upper 95% |
|----------|--------|---------|-----------|-----------|-----------|
| No       | 174    | 3.99943 | 0.12841   | 3.7462    | 4.2527    |
| Yes      | 22     | 1.94091 | 0.36112   | 1.2287    | 2.6531    |

##### *QYr.dms-4B*

| Source                | DF  | Sum of Squares | Mean Square | F Ratio | Prob > F |
|-----------------------|-----|----------------|-------------|---------|----------|
| Selection using RLPSI | 1   | 248.2823       | 248.282     | 87.1349 | <0.001   |
| Error                 | 586 | 1669.7494      | 2.849       |         |          |
| Total                 | 587 | 1918.0316      |             |         |          |

Comparison of mean disease severity of genotypes selected based on RLPSI (Yes) with unselected ones (No)

| Selected | Number | Mean    | Std Error | Lower 95% | Upper 95% |
|----------|--------|---------|-----------|-----------|-----------|
| No       | 522    | 3.99943 | 0.07388   | 3.8543    | 4.1445    |
| Yes      | 66     | 1.94091 | 0.20778   | 1.5328    | 2.3490    |

*QYr.dms-5A*

| Source                | DF  | Sum of Squares | Mean Square | F Ratio | Prob > F |
|-----------------------|-----|----------------|-------------|---------|----------|
| Selection using RLPSI | 1   | 82.76075       | 82.7608     | 28.8467 | <0.001   |
| Error                 | 194 | 556.58312      | 2.8690      |         |          |
| Total                 | 195 | 639.34388      |             |         |          |

Comparison of mean disease severity of genotypes selected based on RLPSI (Yes) with unselected ones (No)

| Selected | Number | Mean    | Std Error | Lower 95% | Upper 95% |
|----------|--------|---------|-----------|-----------|-----------|
| No       | 174    | 3.99943 | 0.12841   | 3.7462    | 4.2527    |
| Yes      | 22     | 1.94091 | 0.36112   | 1.2287    | 2.6531    |

*QYr.dms-7D*

| Source                | DF  | Sum of Squares | Mean Square | F Ratio | Prob > F |
|-----------------------|-----|----------------|-------------|---------|----------|
| Selection using RLPSI | 1   | 82.76075       | 82.7608     | 28.8467 | <0.001   |
| Error                 | 194 | 556.58312      | 2.8690      |         |          |
| Total                 | 195 | 639.34388      |             |         |          |

Comparison of mean disease severity of genotypes selected based on RLPSI (Yes) with unselected ones (No)

| Selected | Number | Mean    | Std Error | Lower 95% | Upper 95% |
|----------|--------|---------|-----------|-----------|-----------|
| No       | 174    | 3.99943 | 0.12841   | 3.7462    | 4.2527    |
| Yes      | 22     | 1.94091 | 0.36112   | 1.2287    | 2.6531    |

**B) Comparisons of thirteen leaf rust QTLs***QLr.dms-1B*

| Source                | DF  | Sum of Squares | Mean Square | F Ratio  | Prob > F |
|-----------------------|-----|----------------|-------------|----------|----------|
| Selection using RLPSI | 1   | 401.2463       | 401.246     | 153.4918 | <0.001   |
| Error                 | 782 | 2044.2433      | 2.614       |          |          |
| Total                 | 783 | 2445.4896      |             |          |          |

Comparison of mean disease severity of genotypes selected based on RLPSI (Yes) with unselected ones (No)

| Selected | Number | Mean    | Std Error | Lower 95% | Upper 95% |
|----------|--------|---------|-----------|-----------|-----------|
| No       | 696    | 3.78448 | 0.06129   | 3.6642    | 3.9048    |

| Selected | Number | Mean    | Std Error | Lower 95% | Upper 95% |
|----------|--------|---------|-----------|-----------|-----------|
| Yes      | 88     | 1.51818 | 0.17235   | 1.1799    | 1.8565    |

*QLr.dms-2A*

| Source                | DF  | Sum of Squares | Mean Square | F Ratio | Prob > F |
|-----------------------|-----|----------------|-------------|---------|----------|
| Selection using RLPSI | 1   | 100.31157      | 100.312     | 38.0785 | <0.001   |
| Error                 | 194 | 511.06083      | 2.634       |         |          |
| Total                 | 195 | 611.37240      |             |         |          |

Comparison of mean disease severity of genotypes selected based on RLPSI (Yes) with unselected ones (No)

| Selected | Number | Mean    | Std Error | Lower 95% | Upper 95% |
|----------|--------|---------|-----------|-----------|-----------|
| No       | 174    | 3.78448 | 0.12304   | 3.5418    | 4.0272    |
| Yes      | 22     | 1.51818 | 0.34604   | 0.8357    | 2.2007    |

*QLr.dms-2B.1*

| Source                | DF  | Sum of Squares | Mean Square | F Ratio | Prob > F |
|-----------------------|-----|----------------|-------------|---------|----------|
| Selection using RLPSI | 1   | 100.31157      | 100.312     | 38.0785 | <0.001   |
| Error                 | 194 | 511.06083      | 2.634       |         |          |
| Total                 | 195 | 611.37240      |             |         |          |

Comparison of mean disease severity of genotypes selected based on RLPSI (Yes) with unselected ones (No)

| Selected | Number | Mean    | Std Error | Lower 95% | Upper 95% |
|----------|--------|---------|-----------|-----------|-----------|
| No       | 174    | 3.78448 | 0.12304   | 3.5418    | 4.0272    |
| Yes      | 22     | 1.51818 | 0.34604   | 0.8357    | 2.2007    |

*QLr.dms-2B.2*

| Source                | DF   | Sum of Squares | Mean Square | F Ratio  | Prob > F |
|-----------------------|------|----------------|-------------|----------|----------|
| Selection using RLPSI | 1    | 1003.1157      | 1003.12     | 384.3183 | <0.001   |
| Error                 | 1958 | 5110.6083      | 2.61        |          |          |
| Total                 | 1959 | 6113.7240      |             |          |          |

Comparison of mean disease severity of genotypes selected based on RLPSI (Yes) with unselected ones (No)

| Selected | Number | Mean    | Std Error | Lower 95% | Upper 95% |
|----------|--------|---------|-----------|-----------|-----------|
| No       | 1740   | 3.78448 | 0.03873   | 3.7085    | 3.8604    |
| Yes      | 220    | 1.51818 | 0.10892   | 1.3046    | 1.7318    |

*QLr.dms-2D*

| Source                | DF  | Sum of Squares | Mean Square | F Ratio  | Prob > F |
|-----------------------|-----|----------------|-------------|----------|----------|
| Selection using RLPSI | 1   | 501.5578       | 501.558     | 191.9629 | <0.001   |
| Error                 | 978 | 2555.3042      | 2.613       |          |          |
| Total                 | 979 | 3056.8620      |             |          |          |

Comparison of mean disease severity of genotypes selected based on RLPSI (Yes) with unselected ones (No)

| Selected | Number | Mean    | Std Error | Lower 95% | Upper 95% |
|----------|--------|---------|-----------|-----------|-----------|
| No       | 870    | 3.78448 | 0.05480   | 3.6769    | 3.8920    |
| Yes      | 110    | 1.51818 | 0.15412   | 1.2157    | 1.8206    |

#### *QLr.dms-3A*

| Source                | DF  | Sum of Squares | Mean Square | F Ratio | Prob > F |
|-----------------------|-----|----------------|-------------|---------|----------|
| Selection using RLPSI | 1   | 100.31157      | 100.312     | 38.0785 | <0.001   |
| Error                 | 194 | 511.06083      | 2.634       |         |          |
| Total                 | 195 | 611.37240      |             |         |          |

Comparison of mean disease severity of genotypes selected based on RLPSI (Yes) with unselected ones (No)

| Selected | Number | Mean    | Std Error | Lower 95% | Upper 95% |
|----------|--------|---------|-----------|-----------|-----------|
| No       | 174    | 3.78448 | 0.12304   | 3.5418    | 4.0272    |
| Yes      | 22     | 1.51818 | 0.34604   | 0.8357    | 2.2007    |

#### *QLr.dms-3B.1*

| Source                | DF  | Sum of Squares | Mean Square | F Ratio | Prob > F |
|-----------------------|-----|----------------|-------------|---------|----------|
| Selection using RLPSI | 1   | 100.31157      | 100.312     | 38.0785 | <0.001   |
| Error                 | 194 | 511.06083      | 2.634       |         |          |
| Total                 | 195 | 611.37240      |             |         |          |

Comparison of mean disease severity of genotypes selected based on RLPSI (Yes) with unselected ones (No)

| Selected | Number | Mean    | Std Error | Lower 95% | Upper 95% |
|----------|--------|---------|-----------|-----------|-----------|
| No       | 174    | 3.78448 | 0.12304   | 3.5418    | 4.0272    |
| Yes      | 22     | 1.51818 | 0.34604   | 0.8357    | 2.2007    |

#### *QLr.dms-3B.2*

| Source                | DF  | Sum of Squares | Mean Square | F Ratio  | Prob > F |
|-----------------------|-----|----------------|-------------|----------|----------|
| Selection using RLPSI | 1   | 401.2463       | 401.246     | 153.4918 | <0.001   |
| Error                 | 782 | 2044.2433      | 2.614       |          |          |
| Total                 | 783 | 2445.4896      |             |          |          |

Comparison of mean disease severity of genotypes selected based on RLPSI (Yes) with unselected ones (No)

| Selected | Number | Mean    | Std Error | Lower 95% | Upper 95% |
|----------|--------|---------|-----------|-----------|-----------|
| No       | 696    | 3.78448 | 0.06129   | 3.6642    | 3.9048    |
| Yes      | 88     | 1.51818 | 0.17235   | 1.1799    | 1.8565    |

#### *QLr.dms-3D*

| Source                | DF  | Sum of Squares | Mean Square | F Ratio | Prob > F |
|-----------------------|-----|----------------|-------------|---------|----------|
| Selection using RLPSI | 1   | 100.31157      | 100.312     | 38.0785 | <0.001   |
| Error                 | 194 | 511.06083      | 2.634       |         |          |
| Total                 | 195 | 611.37240      |             |         |          |

Comparison of mean disease severity of genotypes selected based on RLPSI (Yes) with unselected ones (No)

| Selected | Number | Mean    | Std Error | Lower 95% | Upper 95% |
|----------|--------|---------|-----------|-----------|-----------|
| No       | 174    | 3.78448 | 0.12304   | 3.5418    | 4.0272    |
| Yes      | 22     | 1.51818 | 0.34604   | 0.8357    | 2.2007    |

#### *QLr.dms-5A.1*

| Source                | DF  | Sum of Squares | Mean Square | F Ratio | Prob > F |
|-----------------------|-----|----------------|-------------|---------|----------|
| Selection using RLPSI | 1   | 200.6231       | 200.623     | 76.5496 | <0.001   |
| Error                 | 390 | 1022.1217      | 2.621       |         |          |
| Total                 | 391 | 1222.7448      |             |         |          |

Comparison of mean disease severity of genotypes selected based on RLPSI (Yes) with unselected ones (No)

| Selected | Number | Mean    | Std Error | Lower 95% | Upper 95% |
|----------|--------|---------|-----------|-----------|-----------|
| No       | 348    | 3.78448 | 0.08678   | 3.6139    | 3.9551    |
| Yes      | 44     | 1.51818 | 0.24406   | 1.0383    | 1.9980    |

#### *QLr.dms-5A.2*

| Source                | DF  | Sum of Squares | Mean Square | F Ratio | Prob > F |
|-----------------------|-----|----------------|-------------|---------|----------|
| Selection using RLPSI | 1   | 100.31157      | 100.312     | 38.0785 | <0.001   |
| Error                 | 194 | 511.06083      | 2.634       |         |          |
| Total                 | 195 | 611.37240      |             |         |          |

Comparison of mean disease severity of genotypes selected based on RLPSI (Yes) with unselected ones (No)

| Selected | Number | Mean    | Std Error | Lower 95% | Upper 95% |
|----------|--------|---------|-----------|-----------|-----------|
| No       | 174    | 3.78448 | 0.12304   | 3.5418    | 4.0272    |
| Yes      | 22     | 1.51818 | 0.34604   | 0.8357    | 2.2007    |

*QLr.dms-5B*

| Source                | DF  | Sum of Squares | Mean Square | F Ratio | Prob > F |
|-----------------------|-----|----------------|-------------|---------|----------|
| Selection using RLPSI | 1   | 200.6231       | 200.623     | 76.5496 | <0.001   |
| Error                 | 390 | 1022.1217      | 2.621       |         |          |
| Total                 | 391 | 1222.7448      |             |         |          |

Comparison of mean disease severity of genotypes selected based on RLPSI (Yes) with unselected ones (No)

| Selected | Number | Mean    | Std Error | Lower 95% | Upper 95% |
|----------|--------|---------|-----------|-----------|-----------|
| No       | 348    | 3.78448 | 0.08678   | 3.6139    | 3.9551    |
| Yes      | 44     | 1.51818 | 0.24406   | 1.0383    | 1.9980    |

*QLr.dms-7B*

| Source                | DF  | Sum of Squares | Mean Square | F Ratio | Prob > F |
|-----------------------|-----|----------------|-------------|---------|----------|
| Selection using RLPSI | 1   | 100.31157      | 100.312     | 38.0785 | <0.001   |
| Error                 | 194 | 511.06083      | 2.634       |         |          |
| Total                 | 195 | 611.37240      |             |         |          |

Comparison of mean disease severity of genotypes selected based on RLPSI (Yes) with unselected ones (No)

| Selected | Number | Mean    | Std Error | Lower 95% | Upper 95% |
|----------|--------|---------|-----------|-----------|-----------|
| No       | 174    | 3.78448 | 0.12304   | 3.5418    | 4.0272    |
| Yes      | 22     | 1.51818 | 0.34604   | 0.8357    | 2.2007    |

**C) Comparisons of seven leaf spot QTLs***QLs.dms-1B*

| Source                | DF  | Sum of Squares | Mean Square | F Ratio | Prob > F |
|-----------------------|-----|----------------|-------------|---------|----------|
| Selection using RLPSI | 1   | 21.39344       | 21.3934     | 28.9616 | <0.001   |
| Error                 | 194 | 143.30432      | 0.7387      |         |          |
| Total                 | 195 | 164.69776      |             |         |          |

Comparison of mean disease severity of genotypes selected based on RLPSI (Yes) with unselected ones (No)

| Selected | Number | Mean    | Std Error | Lower 95% | Upper 95% |
|----------|--------|---------|-----------|-----------|-----------|
| No       | 174    | 4.25115 | 0.06516   | 4.1226    | 4.3797    |
| Yes      | 22     | 3.20455 | 0.18324   | 2.8431    | 3.5659    |

*QLs.dms-2A.1*

| Source                | DF  | Sum of Squares | Mean Square | F Ratio | Prob > F |
|-----------------------|-----|----------------|-------------|---------|----------|
| Selection using RLPSI | 1   | 21.39344       | 21.3934     | 28.9616 | <0.001   |
| Error                 | 194 | 143.30432      | 0.7387      |         |          |
| Total                 | 195 | 164.69776      |             |         |          |

Comparison of mean disease severity of genotypes selected based on RLPSI (Yes) with unselected ones (No)

| Selected | Number | Mean    | Std Error | Lower 95% | Upper 95% |
|----------|--------|---------|-----------|-----------|-----------|
| No       | 174    | 4.25115 | 0.06516   | 4.1226    | 4.3797    |
| Yes      | 22     | 3.20455 | 0.18324   | 2.8431    | 3.5659    |

*QLs.dms-2A.2*

| Source                | DF   | Sum of Squares | Mean Square | F Ratio  | Prob > F |
|-----------------------|------|----------------|-------------|----------|----------|
| Selection using RLPSI | 1    | 128.36064      | 128.361     | 175.2627 | <0.001   |
| Error                 | 1174 | 859.82589      | 0.732       |          |          |
| Total                 | 1175 | 988.18653      |             |          |          |

Comparison of mean disease severity of genotypes selected based on RLPSI (Yes) with unselected ones (No)

| Selected | Number | Mean    | Std Error | Lower 95% | Upper 95% |
|----------|--------|---------|-----------|-----------|-----------|
| No       | 1044   | 4.25115 | 0.02649   | 4.1992    | 4.3031    |
| Yes      | 132    | 3.20455 | 0.07449   | 3.0584    | 3.3507    |

*QLs.dms-2B*

| Source                | DF  | Sum of Squares | Mean Square | F Ratio | Prob > F |
|-----------------------|-----|----------------|-------------|---------|----------|
| Selection using RLPSI | 1   | 21.39344       | 21.3934     | 28.9616 | <0.001   |
| Error                 | 194 | 143.30432      | 0.7387      |         |          |
| Total                 | 195 | 164.69776      |             |         |          |

Comparison of mean disease severity of genotypes selected based on RLPSI (Yes) with unselected ones (No)

| Selected | Number | Mean    | Std Error | Lower 95% | Upper 95% |
|----------|--------|---------|-----------|-----------|-----------|
| No       | 174    | 4.25115 | 0.06516   | 4.1226    | 4.3797    |
| Yes      | 22     | 3.20455 | 0.18324   | 2.8431    | 3.5659    |

*QLs.dms-3B*

| Source                | DF  | Sum of Squares | Mean Square | F Ratio | Prob > F |
|-----------------------|-----|----------------|-------------|---------|----------|
| Selection using RLPSI | 1   | 21.39344       | 21.3934     | 28.9616 | <0.001   |
| Error                 | 194 | 143.30432      | 0.7387      |         |          |
| Total                 | 195 | 164.69776      |             |         |          |

Comparison of mean disease severity of genotypes selected based on RLPSI (Yes) with unselected ones (No)

| Selected | Number | Mean    | Std Error | Lower 95% | Upper 95% |
|----------|--------|---------|-----------|-----------|-----------|
| No       | 174    | 4.25115 | 0.06516   | 4.1226    | 4.3797    |
| Yes      | 22     | 3.20455 | 0.18324   | 2.8431    | 3.5659    |

*QLs.dms-4A*

| Source                | DF  | Sum of Squares | Mean Square | F Ratio | Prob > F |
|-----------------------|-----|----------------|-------------|---------|----------|
| Selection using RLPSI | 1   | 21.39344       | 21.3934     | 28.9616 | <0.001   |
| Error                 | 194 | 143.30432      | 0.7387      |         |          |
| Total                 | 195 | 164.69776      |             |         |          |

Comparison of mean disease severity of genotypes selected based on RLPSI (Yes) with unselected ones (No)

| Selected | Number | Mean    | Std Error | Lower 95% | Upper 95% |
|----------|--------|---------|-----------|-----------|-----------|
| No       | 174    | 4.25115 | 0.06516   | 4.1226    | 4.3797    |
| Yes      | 22     | 3.20455 | 0.18324   | 2.8431    | 3.5659    |

*QLs.dms-7D*

| Source                | DF  | Sum of Squares | Mean Square | F Ratio | Prob > F |
|-----------------------|-----|----------------|-------------|---------|----------|
| Selection using RLPSI | 1   | 21.39344       | 21.3934     | 28.9616 | <0.001   |
| Error                 | 194 | 143.30432      | 0.7387      |         |          |
| Total                 | 195 | 164.69776      |             |         |          |

Comparison of mean disease severity of genotypes selected based on RLPSI (Yes) with unselected ones (No)

| Selected | Number | Mean    | Std Error | Lower 95% | Upper 95% |
|----------|--------|---------|-----------|-----------|-----------|
| No       | 174    | 4.25115 | 0.06516   | 4.1226    | 4.3797    |
| Yes      | 22     | 3.20455 | 0.18324   | 2.8431    | 3.5659    |

## D) Comparisons of twelve common bunt QTLs

*QCbt.dms-1A.1*

| Source                | DF  | Sum of Squares | Mean Square | F Ratio | Prob > F |
|-----------------------|-----|----------------|-------------|---------|----------|
| Selection using RLPSI | 1   | 27.98955       | 27.9895     | 11.4419 | <0.001   |
| Error                 | 194 | 474.56856      | 2.4462      |         |          |
| Total                 | 195 | 502.55811      |             |         |          |

Comparison of mean disease severity of genotypes selected based on RLPSI (Yes) with unselected ones (No)

| Selected | Number | Mean    | Std Error | Lower 95% | Upper 95% |
|----------|--------|---------|-----------|-----------|-----------|
| No       | 174    | 2.64713 | 0.11857   | 2.4133    | 2.8810    |
| Yes      | 22     | 1.45000 | 0.33346   | 0.7923    | 2.1077    |

#### *QCbt.dms-1A.2*

| Source                | DF  | Sum of Squares | Mean Square | F Ratio | Prob > F |
|-----------------------|-----|----------------|-------------|---------|----------|
| Selection using RLPSI | 1   | 55.9791        | 55.9791     | 23.0018 | <0.001   |
| Error                 | 390 | 949.1371       | 2.4337      |         |          |
| Total                 | 391 | 1005.1162      |             |         |          |

Comparison of mean disease severity of genotypes selected based on RLPSI (Yes) with unselected ones (No)

| Selected | Number | Mean    | Std Error | Lower 95% | Upper 95% |
|----------|--------|---------|-----------|-----------|-----------|
| No       | 348    | 2.64713 | 0.08363   | 2.4827    | 2.8115    |
| Yes      | 44     | 1.45000 | 0.23518   | 0.9876    | 1.9124    |

#### *QCbt.dms-1A.3*

| Source                | DF  | Sum of Squares | Mean Square | F Ratio | Prob > F |
|-----------------------|-----|----------------|-------------|---------|----------|
| Selection using RLPSI | 1   | 27.98955       | 27.9895     | 11.4419 | <0.001   |
| Error                 | 194 | 474.56856      | 2.4462      |         |          |
| Total                 | 195 | 502.55811      |             |         |          |

Comparison of mean disease severity of genotypes selected based on RLPSI (Yes) with unselected ones (No)

| Selected | Number | Mean    | Std Error | Lower 95% | Upper 95% |
|----------|--------|---------|-----------|-----------|-----------|
| No       | 174    | 2.64713 | 0.11857   | 2.4133    | 2.8810    |
| Yes      | 22     | 1.45000 | 0.33346   | 0.7923    | 2.1077    |

#### *QCbt.dms-1B*

| Source                | DF  | Sum of Squares | Mean Square | F Ratio | Prob > F |
|-----------------------|-----|----------------|-------------|---------|----------|
| Selection using RLPSI | 1   | 27.98955       | 27.9895     | 11.4419 | <0.001   |
| Error                 | 194 | 474.56856      | 2.4462      |         |          |

| Source | DF  | Sum of Squares | Mean Square | F Ratio | Prob > F |
|--------|-----|----------------|-------------|---------|----------|
| Total  | 195 | 502.55811      |             |         |          |

Comparison of mean disease severity of genotypes selected based on RLPSI (Yes) with unselected ones (No)

| Selected | Number | Mean    | Std Error | Lower 95% | Upper 95% |
|----------|--------|---------|-----------|-----------|-----------|
| No       | 174    | 2.64713 | 0.11857   | 2.4133    | 2.8810    |
| Yes      | 22     | 1.45000 | 0.33346   | 0.7923    | 2.1077    |

#### *QCbt.dms-1D*

| Source                | DF  | Sum of Squares | Mean Square | F Ratio | Prob > F |
|-----------------------|-----|----------------|-------------|---------|----------|
| Selection using RLPSI | 1   | 27.98955       | 27.9895     | 11.4419 | <0.001   |
| Error                 | 194 | 474.56856      | 2.4462      |         |          |
| Total                 | 195 | 502.55811      |             |         |          |

Comparison of mean disease severity of genotypes selected based on RLPSI (Yes) with unselected ones (No)

| Selected | Number | Mean    | Std Error | Lower 95% | Upper 95% |
|----------|--------|---------|-----------|-----------|-----------|
| No       | 174    | 2.64713 | 0.11857   | 2.4133    | 2.8810    |
| Yes      | 22     | 1.45000 | 0.33346   | 0.7923    | 2.1077    |

#### *QCbt.dms-2B*

| Source                | DF  | Sum of Squares | Mean Square | F Ratio | Prob > F |
|-----------------------|-----|----------------|-------------|---------|----------|
| Selection using RLPSI | 1   | 27.98955       | 27.9895     | 11.4419 | <0.001   |
| Error                 | 194 | 474.56856      | 2.4462      |         |          |
| Total                 | 195 | 502.55811      |             |         |          |

Comparison of mean disease severity of genotypes selected based on RLPSI (Yes) with unselected ones (No)

| Selected | Number | Mean    | Std Error | Lower 95% | Upper 95% |
|----------|--------|---------|-----------|-----------|-----------|
| No       | 174    | 2.64713 | 0.11857   | 2.4133    | 2.8810    |
| Yes      | 22     | 1.45000 | 0.33346   | 0.7923    | 2.1077    |

#### *QCbt.dms-3A.1*

| Source                | DF  | Sum of Squares | Mean Square | F Ratio | Prob > F |
|-----------------------|-----|----------------|-------------|---------|----------|
| Selection using RLPSI | 1   | 27.98955       | 27.9895     | 11.4419 | <0.001   |
| Error                 | 194 | 474.56856      | 2.4462      |         |          |
| Total                 | 195 | 502.55811      |             |         |          |

Comparison of mean disease severity of genotypes selected based on RLPSI (Yes) with unselected ones (No)

| Selected | Number | Mean    | Std Error | Lower 95% | Upper 95% |
|----------|--------|---------|-----------|-----------|-----------|
| No       | 174    | 2.64713 | 0.11857   | 2.4133    | 2.8810    |
| Yes      | 22     | 1.45000 | 0.33346   | 0.7923    | 2.1077    |

*QCbt.dms-3A.2*

| Source                | DF  | Sum of Squares | Mean Square | F Ratio | Prob > F |
|-----------------------|-----|----------------|-------------|---------|----------|
| Selection using RLPSI | 1   | 27.98955       | 27.9895     | 11.4419 | <0.001   |
| Error                 | 194 | 474.56856      | 2.4462      |         |          |
| Total                 | 195 | 502.55811      |             |         |          |

Comparison of mean disease severity of genotypes selected based on RLPSI (Yes) with unselected ones (No)

| Selected | Number | Mean    | Std Error | Lower 95% | Upper 95% |
|----------|--------|---------|-----------|-----------|-----------|
| No       | 174    | 2.64713 | 0.11857   | 2.4133    | 2.8810    |
| Yes      | 22     | 1.45000 | 0.33346   | 0.7923    | 2.1077    |

*QCbt.dms-5D.1*

| Source                | DF  | Sum of Squares | Mean Square | F Ratio | Prob > F |
|-----------------------|-----|----------------|-------------|---------|----------|
| Selection using RLPSI | 1   | 27.98955       | 27.9895     | 11.4419 | <0.001   |
| Error                 | 194 | 474.56856      | 2.4462      |         |          |
| Total                 | 195 | 502.55811      |             |         |          |

Comparison of mean disease severity of genotypes selected based on RLPSI (Yes) with unselected ones (No)

| Selected | Number | Mean    | Std Error | Lower 95% | Upper 95% |
|----------|--------|---------|-----------|-----------|-----------|
| No       | 174    | 2.64713 | 0.11857   | 2.4133    | 2.8810    |
| Yes      | 22     | 1.45000 | 0.33346   | 0.7923    | 2.1077    |

*QCbt.dms-5D.2*

| Source                | DF  | Sum of Squares | Mean Square | F Ratio | Prob > F |
|-----------------------|-----|----------------|-------------|---------|----------|
| Selection using RLPSI | 1   | 27.98955       | 27.9895     | 11.4419 | <0.001   |
| Error                 | 194 | 474.56856      | 2.4462      |         |          |
| Total                 | 195 | 502.55811      |             |         |          |

Comparison of mean disease severity of genotypes selected based on RLPSI (Yes) with unselected ones (No)

| Selected | Number | Mean    | Std Error | Lower 95% | Upper 95% |
|----------|--------|---------|-----------|-----------|-----------|
| No       | 174    | 2.64713 | 0.11857   | 2.4133    | 2.8810    |

| Selected | Number | Mean    | Std Error | Lower 95% | Upper 95% |
|----------|--------|---------|-----------|-----------|-----------|
| Yes      | 22     | 1.45000 | 0.33346   | 0.7923    | 2.1077    |

*QCbt.dms-6D*

| Source                | DF  | Sum of Squares | Mean Square | F Ratio | Prob > F |
|-----------------------|-----|----------------|-------------|---------|----------|
| Selection using RLPSI | 1   | 27.98955       | 27.9895     | 11.4419 | <0.001   |
| Error                 | 194 | 474.56856      | 2.4462      |         |          |
| Total                 | 195 | 502.55811      |             |         |          |

Comparison of mean disease severity of genotypes selected based on RLPSI (Yes) with unselected ones (No)

| Selected | Number | Mean    | Std Error | Lower 95% | Upper 95% |
|----------|--------|---------|-----------|-----------|-----------|
| No       | 174    | 2.64713 | 0.11857   | 2.4133    | 2.8810    |
| Yes      | 22     | 1.45000 | 0.33346   | 0.7923    | 2.1077    |

*QCbt.dms-7A*

| Source                | DF  | Sum of Squares | Mean Square | F Ratio | Prob > F |
|-----------------------|-----|----------------|-------------|---------|----------|
| Selection using RLPSI | 1   | 27.98955       | 27.9895     | 11.4419 | <0.001   |
| Error                 | 194 | 474.56856      | 2.4462      |         |          |
| Total                 | 195 | 502.55811      |             |         |          |

Comparison of mean disease severity of genotypes selected based on RLPSI (Yes) with unselected ones (No)

| Selected | Number | Mean    | Std Error | Lower 95% | Upper 95% |
|----------|--------|---------|-----------|-----------|-----------|
| No       | 174    | 2.64713 | 0.11857   | 2.4133    | 2.8810    |
| Yes      | 22     | 1.45000 | 0.33346   | 0.7923    | 2.1077    |
