# Supplementary material for: Identification of Disease Resistance Parents and Genome-Wide Association Mapping of Resistance in Spring Wheat
Source: Plants (Basel). 2022 Oct 28;11(21):2905. doi: 10.3390/plants11212905 (PMC9658635; doi:10.3390/plants11212905)
Supplement: Supplementary file 1 [file plants-11-02905-s001.zip]

Archive with 9 entries (9 files):
- Figure S1-S4 R1.pptx
- Table S1 Correlations summary.xlsx
- Table S2 Germplasm summary.xlsx
- Table S3 Marker information.xlsx
- Table S4 IBS distance summary.xlsx
- Table S5 RLPSI summary R1.xlsx
- Table S6 GWAS detail results R1.xlsx
- Table S7 ANOVA.pdf
- Table S8 RLPSI code.pdf
