# Supplementary material for: Identification of Disease Resistance Parents and Genome-Wide Association Mapping of Resistance in Spring Wheat
Source: Plants (Basel). 2022 Oct 28;11(21):2905. doi: 10.3390/plants11212905 (PMC9658635; doi:10.3390/plants11212905)
Supplement: Supplementary file 1 [file plants-11-02905-s001.zip › Table S1 Correlations summary.xlsx]

## Sheet: Correlations
Table S1. Pearson correlation coefficients between pairs of environments used to evaluating reaction to stripe rust, leaf rust, leaf spot, and common bunt.
a) Stripe rust (all pairs significant at p < 0.01)
	Overall_Yr	Yr_Cres-2018	Yr_Cres-2020	Yr_Edm-2016	Yr_Edm-2018	Yr_Leth-2016	Yr_Leth-2017	Yr_Leth-2018
Overall_Yr
Yr_Cres-2018	0.7351
Yr_Cres-2020	0.8786	0.5469
Yr_Edm-2016	0.8464	0.5632	0.7416
Yr_Edm-2018	0.8034	0.4927	0.7784	0.6547
Yr_Leth-2016	0.8966	0.5889	0.7669	0.8158	0.7096
Yr_Leth-2017	0.7485	0.5867	0.5097	0.5421	0.4789	0.6244
Yr_Leth-2018	0.8265	0.5776	0.6775	0.5813	0.5895	0.6457	0.6388
Yr_Leth-2019	0.8799	0.6153	0.741	0.6401	0.6676	0.7299	0.6776	0.7404
b) Leafrust (all pairs significant at p < 0.01)
	Overall_Lr	Lr_Edm-2017	Lr_Edm-2020	Lr_Mord-2019
Overall_Lr
Lr_Edm-2017	0.877
Lr_Edm-2020	0.8905	0.7451
Lr_Mord-2019	0.8145	0.566	0.6195
Lr_Mord-2020	0.7207	0.4699	0.5156	0.5957
c) Leaf spot (all pairs significant at p < 0.01)
	Overall_Ls	Ls_Edm-2016	Ls_Edm-2017	Ls_Edm-2018
Overall_Ls
Ls_Edm-2016	0.5554
Ls_Edm-2017	0.8194	0.3418
Ls_Edm-2018	0.525	-0.0568	0.0749
d) Common bunt (all pairs significant at p < 0.01)
	Overall_Bunt	Cb_Edm-2016	Cb_Edm-2017
Overall_Bunt
Cb_Edm-2016	0.8605
Cb_Edm-2017	0.9442	0.6206
