# Supplementary material for: Identification of Disease Resistance Parents and Genome-Wide Association Mapping of Resistance in Spring Wheat
Source: Plants (Basel). 2022 Oct 28;11(21):2905. doi: 10.3390/plants11212905 (PMC9658635; doi:10.3390/plants11212905)
Supplement: Supplementary file 1 [file plants-11-02905-s001.zip › Table S2 Germplasm summary.xlsx]

## Sheet: Table S2A
Table S2. Summary of the 196 spring wheat cultivars and lines used in the present study, including the best linear unbiased estimators (BLUEs) computed by combining phenotype data of all environments. The agronomic traits were based on a previous study (Iqbal et al. 2022)
A) Summary of the 196 cultivars and lines used in the present study and those selected based on each disease (single-trait) and multi-trait index (RLPSI)
GID	Genotype	Type of germplasm	Western Canada wheat class (as of Sept 28, 2021)*	Year of registration or development	Date of registration	Type of registration	Canadian representaive (Breeding program)	Group membership based on population structure analysis	Used as a disease resistant checks	Stripe rust overall score	Leaf rust overall score	Common bunt overall score	Leaf spot overall score	Selection based on stripe rust (Yr) score	Selection based on leaf rust (Lr) score	Selection based on common bunt (Cb) score	Selection based on leaf spot (Ls) score	Selected based on multi-trait RLPSI	Maturity (d)	Plant height (cm)	Grain yield (t ha-1)	Grain protein content (Con)	Selected based on agronomic traits in a previous study [29]
GID-001	5604HR CL	Cultivar	CWRS	2011	2011-02-21	Regional Registration	Syngenta Canada Inc.	G1		6.4	2.9	4.3	4		Yes				85.96	81.81	4.23	15.68
GID-002	5605HR CL	Cultivar	CNHR	2013	2013-06-17	Regional Registration	Syngenta Canada Inc.	G3		2.2	1	1.5	2.3		Yes		Yes	Yes	89.61	84.79	4.86	16.7	Yes
GID-003	5700PR	Cultivar	CPSR	2001	2001-01-12	Regional Registration	Nutrien AG Solutions Inc.	G2		8.1	4.7	1	4			Yes			93.31	76.45	5.16	13.79
GID-004	5701PR	Cultivar	CPSR	2002	2002-01-11	Regional Registration	Nutrien AG Solutions Inc.	G2		1.8	1.4	2.5	3.2	Yes	Yes			Yes	92.62	77.38	4.95	15.81
GID-005	5702PR	Cultivar	CPSR	2008	2008-01-09	Regional Registration	Syngenta Canada Inc.	G2		2.9	2.3	2.3	4.2		Yes				92.94	83.2	5.35	13.87
GID-006	AAC Bailey	Cultivar	CWRS	2012	2012-06-07	Regional Registration	Agriculture and Agri-Food Canada	G3		3.1	1	1.3	3.8		Yes			Yes	85.97	86.79	4.51	15.02
GID-007	AAC Brandon	Cultivar	CWRS	2013	2013-04-23	Regional Registration	Agriculture and Agri-Food Canada	G1		1.5	1.1	2.5	3.7	Yes	Yes			Yes	91.03	78.13	5.24	15.72	Yes
GID-008	AAC Chiffon	Cultivar	CWSWS	2013	2013-04-12	Regional Registration	Agriculture and Agri-Food Canada	G2		1.6	2.6	3.6	3.8	Yes	Yes				90	83.72	4.56	15.29
GID-009	AAC Connery	Cultivar	CWRS	2015	2015-05-20	Regional Registration	Agriculture and Agri-Food Canada	G3		1.6	3.1	1	3.5	Yes		Yes		Yes	88.02	77.62	4.53	16.18
GID-010	AAC Crossfield	Cultivar	CPSR	2016	2016-01-08	Regional Registration	Agriculture and Agri-Food Canada	G2		1.9	1.3	4.3	4.2	Yes	Yes				91.02	77.14	4.5	15.94
GID-011	AAC Elie	Cultivar	CWRS	2013	2013-04-23	Regional Registration	Agriculture and Agri-Food Canada	G1		1.6	1.9	1.8	3.5	Yes	Yes			Yes	90.92	78.88	4.93	15.59
GID-012	AAC Entice	Cultivar	CPSR	2016	2016-01-08	Regional Registration	Agriculture and Agri-Food Canada	G2		1.6	1.2	4	5	Yes	Yes				91.25	76.51	4.8	15.07
GID-013	AAC Foray	Cultivar	CPSR	2014	2014-12-18	Regional Registration	Agriculture and Agri-Food Canada	G2		3.1	1.3	2.8	4.3		Yes				91.24	78.87	4.88	15.45
GID-014	AAC Iceberg	Cultivar	CWHWS	2013	2013-01-15	Regional Registration	Agriculture and Agri-Food Canada	G1		3	2.4	1.3	3.8		Yes				88.45	80.67	4.86	15.29
GID-015	AAC Innova	Cultivar	CWSP	2013	2013-04-12	Regional Registration	Agriculture and Agri-Food Canada	G2		4.4	4.5	3.8	3.8						88.09	79.08	5.2	13.77
GID-016	AAC Penhold	Cultivar	CPSR	2014	2014-07-11	Regional Registration	Agriculture and Agri-Food Canada	G2		2.2	1	1.3	3		Yes			Yes	91.39	72.43	5.2	15.33	Yes
GID-017	AAC Proclaim	Cultivar	CWSP	2013	2013-01-10	Regional Registration	Agriculture and Agri-Food Canada	G2		5.2	3.8	5.3	4.3						91.98	86.28	4.79	13.49
GID-018	AAC Redwater	Cultivar	CNHR	2012	2012-08-13	Regional Registration	Agriculture and Agri-Food Canada	G1		3	2.7	1.3	5		Yes				85.67	79.14	4.61	15.44
GID-019	AAC Ryley	Cultivar	CPSR	2013	2013-04-23	Regional Registration	Agriculture and Agri-Food Canada	G2		5.3	1.9	1.3	3.7		Yes				92.61	74.93	5.34	14.06
GID-020	AAC Tenacious	Cultivar	CPSR	2014	2014-12-18	Regional Registration	Agriculture and Agri-Food Canada	G2		1.9	2.9	1.3	4	Yes	Yes				91.85	91.47	3.74	14.23
GID-021	AAC Viewfield	Cultivar	CWRS	2016	2016-02-12	Regional Registration	Agriculture and Agri-Food Canada	G1		2.6	1.8	1.5	3.5		Yes				90.06	74.07	5.05	15.44	Yes
GID-022	AAC Whitefox	Cultivar	CWHWS	2013	2013-06-18	Regional Registration	Agriculture and Agri-Food Canada	G1		6.7	3.9	2	3.2						85.19	88.91	4.58	14.85
GID-023	AC Abbey	Cultivar	CNHR	1998	1998-07-22	Regional Registration	Agriculture and Agri-Food Canada	G3		4.5	5.9	2.8	5.5						87.57	79.51	4.06	15.06
GID-024	AC Andrew	Cultivar	CWSWS	2004	2004-05-05	Regional Registration	Agriculture and Agri-Food Canada	G2	Yr (Moderately R)	2	5	4.3	3.7	Yes					93.31	77.34	6.01	11.77
GID-025	AC Barrie	Cultivar	CWRS	1994	1994-08-16	National Registration	Secan Association	G3	Yr (susceptible); Cb (intermediately R); Lr (moderately susceptible)	6.4	5.8	2.3	3.7						88.8	85	4.33	16.63
GID-026	AC Cadillac	Cultivar	CWRS	1996	1996-07-17	National Registration	Farm Pure Seeds (ex SW Seed Canada Ltd)	G3		3.4	3.7	2	3.7						86.84	89.35	4.48	16.86	Yes
GID-027	AC Cora	Cultivar	CNHR	1994	1994-12-15	National Registration	Secan Association	G3		4.6	4.6	2.1	6						83.98	83.09	3.97	16.5
GID-028	AC Corinne	Cultivar	CWES	1999	1999-11-22	Regional Registration	Agriculture and Agri-Food Canada	G2		1.2	2.7	4	4	Yes	Yes				90.57	93.8	4.42	15.77
GID-029	AC Crystal	Cultivar	CNHR	1996	1996-07-22	National Registration	Secan Association	G2	Ls (intermediate)	7.1	4.6	1.5	4						95.1	79.16	4.68	14.15
GID-030	AC Domain	Cultivar	CNHR	1993	1993-12-22	National Registration	Secan Association	G1	Ls (susceptible)	3.8	4.8	1.5	4.8						85.24	83.43	4.47	15.56
GID-031	AC Eatonia	Cultivar	CNHR	1993	1993-07-09	National Registration	Nutrien AG Solutions Inc.	G3		4.5	4.2	2	3.8						87.77	89.88	3.92	16.9
GID-032	AC Elsa	Cultivar	CWRS	1996	1996-10-07	Regional Registration	Secan Association	G3		2	2.2	3.3	3.8	Yes	Yes				88.32	82.14	4.33	16.37
GID-033	AC Foremost	Cultivar	CNHR	1995	1995-06-02	Regional Registration	Secan Association	G2	Cb (resistant)	7.8	5	1	4.5			Yes			94.13	71.67	5.07	13.96
GID-034	AC Intrepid	Cultivar	CWRS	1997	1997-08-29	Regional Registration	Agriculture and Agri-Food Canada	G3		2.1	2.7	1.5	3.5		Yes				84.99	86.14	4.64	15.42
GID-035	AC Karma	Cultivar	CPSW	1994	1994-10-11	National Registration	Secan Association	G2		3.4	4	1.5	3.8						94.54	79.25	5.26	14.28
GID-036	AC Majestic	Cultivar	CNHR	1996	1996-01-26	National Registration	Secan Association	G3		6.4	5.2	1.5	3.7						88.78	83.01	4.31	16.01
GID-037	AC Meena	Cultivar	CWSWS	2001	2001-04-20	Regional Registration	Agriculture and Agri-Food Canada	G2		4.6	2.7	3	4.5		Yes				85.35	88.62	4.12	15.31
GID-038	AC Michael	Cultivar	CNHR	1994	1994-01-12	National Registration	Secan Association	G3		6.9	6.7	2.8	5.2						86.11	89.09	3.95	15.83
GID-039	AC Minto	Cultivar	CNHR	1991	1991-01-29	National Registration	Secan Association	G3		5.4	5.1	1	4.8			Yes			95.37	80.45	4.45	15.04
GID-040	AC Nanda	Cultivar	CWSWS	1998	1998-02-25	Regional Registration	Agriculture and Agri-Food Canada	G2		3.9	5.1	3	4.8						90.12	81.88	5.01	13.93
GID-041	AC Phil	Cultivar	CWSWS	1996	1996-03-15	Regional Registration	Agriculture and Agri-Food Canada	G2		4.4	6.1	5.8	6						88.31	72.44	5.06	11.56
GID-042	AC Reed	Cultivar	CWSWS	1991	1991-12-20	Regional Registration	Secan Association	G2		3	5.3	6.8	5.7						89.47	72.25	4.89	11.92
GID-043	AC Splendor	Cultivar	CWRS	1997	1997-03-24	Regional Registration	Secan Association	G3		5.1	5.6	3.5	4.5						83.93	85.94	3.91	16.03
GID-044	AC Taber	Cultivar	CNHR	1991	1991-05-10	National Registration	Secan Association	G2		5.8	4.5	1	4.3			Yes			95.29	76.35	4.57	13.89
GID-045	AC Vista	Cultivar	CPSW	1999	1999-08-23	Regional Registration	Agriculture and Agri-Food Canada	G2	Ls (intermediate)	4.5	4.6	1	4.5			Yes			88.84	77.98	5.13	13.66
GID-046	AC2000	Cultivar	CPSW	2000	2000-06-27	Cancelled	Agriculture and Agri-Food Canada	G2		5.8	5	1	4.8			Yes			95.78	77.92	4.73	14.11
GID-047	Alikat	Cultivar	CNHR	1999	1999-07-30	Regional Registration	University of Alberta	G3		7.5	7	3.3	5.2						85.53	86.34	3.92	15.76
GID-048	Alvena	Cultivar	CNHR	2006	2006-11-10	Regional Registration	Agriculture and Agri-Food Canada	G3		3.1	3	1.3	3						85.37	84.94	4.42	15.71
GID-049	Amazon	Cultivar	CWES	1999	1999-10-22	Regional Registration	University of Manitoba	G2		1.6	3.1	3.3	3.3	Yes					89.46	94.15	4.48	15.75
GID-050	Benito	Cultivar	CWRS	1979	1979-12-19	Cancelled	Secan Association	G3		4.4	4	1.8	4.2						85.47	84.43	3.93	15.95
GID-051	Bhishaj	Cultivar	CWSWS	2003	2003-07-24	Regional Registration	Tony Crooymans & Sons	G2		2	5.1	5.5	6.5	Yes					90.13	77.67	5.28	12.2
GID-052	Biggar	Cultivar	CPSR	1989	1989-04-11	Cancelled	Secan Association	G2		4.4	3.9	7	6.5						95.04	74.76	4.84	13.74
GID-053	Bluesky	Cultivar	CWES	1987	1987-02-26	National Registration	Secan Association	G2		3.4	2.4	2	3.3		Yes				86.1	81.74	4.42	16.22
GID-054	Burnside	Cultivar	CWES	2004	2004-09-23	Regional Registration	Agriculture and Agri-Food Canada	G2		1.3	2.7	3	2.8	Yes	Yes		Yes		90.4	94.84	4.87	16.6
GID-055	BW1039	Line	CWRS		Not registered		University of Alberta	G1		3.6	1.7	1.4	3.6		Yes				89.45	84.28	4.84	15.99
GID-056	BW278	Line	CWRS		Not registered			G1		4.2	4.5	2.8	4						91.44	89.58	4.12	16.49
GID-057	BW493	Line	CWRS		Not registered			G3		2.9	2	5.3	3.5		Yes				89.64	94.51	3.27	15.52
GID-058	SY Slate	Cultivar	CWRS	2016	2016-06-10	Regional Registration	Syngenta Canada Inc.	G1		4.6	4.2	5.6	3						88.34	83.69	4.33	15.59
GID-059	SY Chert	Cultivar	CWRS	2017	2017-12-15	Regional Registration	Syngenta Canada Inc.	G1		3.2	2	1	3.5		Yes	Yes			89.23	78.07	4.39	15.95
GID-060	AAC Concord	Cultivar	CNHR	2016	2016-02-19	Regional Registration	Agriculture and Agri-Food Canada	G3		1.7	1.6	1.8	3.3	Yes	Yes			Yes	91.06	87.64	4.69	15.36
GID-061	AAC Redberry	Cultivar	CWRS	2016	2016-02-19	National Registration	Agriculture and Agri-Food Canada	G1		1.5	1.2	1.5	3.7	Yes	Yes			Yes	86.64	81.14	4.97	16.1
GID-062	AAC Goodwin	Cultivar	CPSR	2017	2017-08-25	Regional Registration	Agriculture and Agri-Food Canada	G3		2.7	1.5	3.3	2.8		Yes		Yes		90.48	78.59	5.64	15.15	Yes
GID-063	BW970 Pro	Line	CWRS		Not registered		University of Saskatchewan	G1		5.1	5	1.3	3						89.57	74.53	4.94	15.56
GID-064	CDC Landmark	Cultivar	CWRS	2016	2016-04-08	Regional Registration	University of Saskatchewan	G1		3.4	4.8	1.5	4.3						87.66	81.42	4.94	16.33
GID-065	Zealand	Cultivar	CWRS	2016	2016-11-10	Regional Registration	University of Alberta	G3		5.3	3.4	1.5	3.5						86.61	90.12	5.17	15.53	Yes
GID-066	BYT14-11	Line	CWRS		Not registered		University of Alberta	G3		1.2	1.6	1	3.2	Yes	Yes	Yes		Yes	92	82.92	4.31	15.95
GID-067	BW5020	Line	CWRS		Not registered		University of Alberta	G1		1.4	1	4.3	3	Yes	Yes				94.04	71.95	5.28	14.63
GID-068	BYT14-19	Line	CWRS		Not registered		University of Alberta	G3		3.2	5.9	3.3	3.3						88.14	85.38	4.26	17.24	Yes
GID-069	Canthatch	Cultivar	CWRS	1959	1959-11-23	Cancelled	Agriculture and Agri-Food Canada	G3		6.3	8.1	2	5.2						88.14	89.59	4.44	14.98
GID-070	Canuck	Cultivar	CWRS	1974	1974-04-03	Cancelled	Agriculture and Agri-Food Canada	G3		4.8	7.8	2	4.3						89.67	96.71	3.71	15.33
GID-071	Carberry	Cultivar	CWRS	2009	2009-09-18	National Registration	Agriculture and Agri-Food Canada	G1		1.8	1.6	1.3	3.7	Yes	Yes			Yes	89.36	77.08	4.49	15.84
GID-072	Cardale	Cultivar	CWRS	2011	2011-08-02	Regional Registration	Seed Depot Corp.	G1		5.9	2	1	5		Yes	Yes			85.77	80.87	4.2	15.34
GID-073	CDC Abound	Cultivar	CWRS	2007	2007-05-10	Regional Registration	University of Saskatchewan	G1		3	2.9	1.5	3.7		Yes				87.79	88.94	4.73	15.76
GID-074	CDC Alsask	Cultivar	CWRS	2005	2005-07-18	Regional Registration	University of Saskatchewan	G3		2.4	1.8	1	2.7		Yes	Yes	Yes	Yes	87.69	88.05	4.57	16.43	Yes
GID-076	CDC Bounty	Cultivar	CWRS	2000	2000-03-16	Regional Registration	University of Saskatchewan	G3		3.7	5.2	2	4.2						86.14	89.99	4.3	16.49	Yes
GID-077	CDC Bradwell	Cultivar	CWRS	2015	2015-05-01	Regional Registration	University of Saskatchewan	G3		2.3	1.8	1.5	3.5		Yes			Yes	90.57	78.44	4.34	15.71
GID-078	CDC Go	Cultivar	CWRS	2004	2004-05-05	Regional Registration	University of Saskatchewan	G1		2.7	3.3	1	3.5			Yes			87.48	79.36	4.52	15.14
GID-079	CDC Imagine	Cultivar	CWRS	2002	2002-12-18	Regional Registration	University of Saskatchewan	G3	Yr (intermediate)	4.2	3.6	2.3	3.3						88.41	84.21	4.67	16.29	Yes
GID-080	CDC Kernen	Cultivar	CWRS	2010	2010-04-21	Regional Registration	University of Saskatchewan	G3		3.7	4	1.5	3.2						89.87	89.43	4.57	15.91
GID-081	CDC Merlin	Cultivar	CWRS	1992	1992-04-21	Cancelled	University of Saskatchewan	G3		4.4	3.5	2	4.2						88.52	93.38	4.43	15.9
GID-082	CDC NRG003	Cultivar	CWSP	2010	2010-04-21	Regional Registration	University of Saskatchewan	G2		5.1	4.6	1	4.7			Yes			89.49	79.71	5.23	13.94
GID-083	CDC Osler	Cultivar	CNHR	2004	2004-05-05	Regional Registration	University of Saskatchewan	G3		3.3	1.7	1.8	5.3		Yes				85.73	84.67	4.62	15.99
GID-084	CDC Plentiful	Cultivar	CWRS	2012	2012-01-04	Regional Registration	University of Saskatchewan	G3		2.3	1.4	2.1	3.6		Yes				86.67	78.8	4.64	15.73
GID-085	CDC Primepurple	Cultivar	CWSP	2013	2013-11-13	Regional Registration	University of Saskatchewan	G2		2.9	6.6	1.2	3.1						94.56	73.95	4.91	12.67
GID-086	CDC Rama	Cultivar	CWES	2002	2002-02-15	Regional Registration	University of Saskatchewan	G2		1.6	3.7	1.3	3.8	Yes					90.45	88.55	4.69	15.28
GID-087	CDC Stanley	Cultivar	CWRS	2010	2010-04-21	Regional Registration	University of Saskatchewan	G3		2.8	2.2	4	3.3		Yes				89.43	85.25	5.15	15.3
GID-088	CDC Teal	Cultivar	CWRS	1991	1991-05-10	National Registration	University of Saskatchewan	G3		2.6	3	2	3.3						86.85	88.93	4.59	16.17
GID-089	CDC Thrive	Cultivar	CWRS	2010	2010-04-21	Regional Registration	University of Saskatchewan	G3		4.4	4.7	2.8	3.8						88.36	89.44	4.82	15.95	Yes
GID-090	CDC Titanium	Cultivar	CWRS	2014	2014-01-13	Regional Registration	Nutrien AG Solutions Inc.	G3		2	1.5	3	3.5	Yes	Yes				87	84.18	4.6	16.21
GID-091	CDC Utmost	Cultivar	CWRS	2010	2010-04-21	Regional Registration	University of Saskatchewan	G3		1.7	1.4	3.5	4.2	Yes	Yes				89.16	82.56	4.41	15.93
GID-092	CDC VR Morris	Cultivar	CWRS	2012	2012-01-04	Regional Registration	University of Saskatchewan	G3		2	4	1.8	5	Yes					89.62	78.83	4.4	17.37	Yes
GID-093	CDC Walrus	Cultivar	CWES	2004	2004-05-05	Regional Registration	University of Saskatchewan	G2		2.3	4	1.8	2.8				Yes		88.67	88.66	4.47	15.99
GID-094	CDC Whitewood	Cultivar	CWHWS	2013	2013-11-13	Regional Registration	University of Saskatchewan	G1		2.6	2.3	6	4.3		Yes				86.46	75.35	4.46	15.29
GID-096	CDN Bison	Cultivar	CWES	2009	2009-09-23	Regional Registration	Agriculture and Agri-Food Canada	G2		1.7	3.9	4.5	3	Yes					94.03	85.01	5.25	15.44
GID-097	Coleman	Cultivar	CWRS	2014	2014-02-05	Regional Registration	University of Alberta	G3		2	1.7	3.3	6	Yes	Yes				83.42	87.59	4.31	15.95
GID-098	Columbus	Cultivar	CNHR	1980	1980-03-27	National Registration	Secan Association	G3		7.7	6.1	1.5	3.2						89.68	96.14	4.23	15.58
GID-099	Conquer	Cultivar	CNHR	2010	2010-06-28	Regional Registration	Agriculture and Agri-Food Canada	G2		1.3	5.8	1.3	4.5	Yes					91.71	84.45	5.16	16.36	Yes
GID-100	Conway	Cultivar	CNHR	1986	1986-04-28	National Registration	University of Saskatchewan	G3		7.7	7.1	2.8	4.7						86.73	90.41	4.1	15.5
GID-101	Cutler	Cultivar	CPSR	1991	1991-01-24	National Registration	University of Alberta	G2		5	5.7	2.8	6.3						86.51	73.21	4.66	14.38
GID-102	Cypress	Cultivar	CWRS	1962	1962-05-24	Cancelled	Agriculture and Agri-Food Canada	G2		5.4	5.3	1.8	5.8						84.78	87.69	2.83	15.92
GID-103	Enchant	Cultivar	CPSR	2012	2012-01-26	Regional Registration	Agriculture and Agri-Food Canada	G2		3.9	2.2	1	4		Yes	Yes			90.42	83.02	4.83	15.68
GID-104	Faller	Cultivar	CNHR	2018	2018-04-06	Regional Registration	Seed Depot Corp.	G1		6.2	4.5	4.6	2.5				Yes		90.58	80.8	5.49	14.23
GID-105	Fielder	Cultivar	CWSWS	1976	1976-03-25	Cancelled	USDA, Aberdeen, Idaho	G2	Cb (Susceptible)	6.9	5.5	3.4	5.2						94.42	76.88	5.45	13.13
GID-106	Fieldstar	Cultivar	CWRS	2008	2008-11-14	Regional Registration	Agriculture and Agri-Food Canada	G1		5.3	3	1.8	4.7						85.03	87.31	4.42	15.02
GID-107	FL62R1	Line			Exotic			G1		3.4	1.2	6.5	4.2		Yes				95.69	90.9	4.37	16.13
GID-108	Garnet	Cultivar	CWRS	1923	1923-01-01	Cancelled	Agriculture and Agri-Food Canada	G2		3.2	6.9	1.6	4.8						83.99	87.62	3.75	14.97
GID-109	Glencross	Cultivar	CWES	2008	2008-06-03	Regional Registration	Agriculture and Agri-Food Canada	G2		1.3	3.1	2.3	3.8	Yes					85.94	91.73	4.72	16.39
GID-110	Glenlea	Cultivar	CWES	1972	1972-03-14	National Registration	University of Manitoba	G2	Lr (intermediate)	1.7	4.9	3.3	5	Yes					90.76	94.93	4.82	15.43
GID-111	Glenn	Cultivar	CWRS	2009	2009-03-24	Regional Registration	Canterra Seeds	G1		3	1.9	1.3	3.2		Yes				88.59	84.22	4.55	16.17
GID-112	Go Early	Cultivar	CWRS	2015	2015-03-13	Regional Registration	University of Alberta	G3		2.4	1.9	1	5.3		Yes	Yes			84.46	86.93	4.51	15.88
GID-113	Goodeve	Cultivar	CWRS	2007	2007-10-22	Regional Registration	Agriculture and Agri-Food Canada	G3		2.3	2.2	2.3	4		Yes				85.89	80.48	4.54	15.95	Yes
GID-114	GP112	Line	CWSP		Not registered		Syngenta Canada Inc.	G2		1.3	1.1	1	2.7	Yes	Yes	Yes	Yes	Yes	91.97	78.54	5.05	14.34
GID-115	CDC Throttle	Cultivar	CWSP	2016	2016-06-24	Regional Registration	University of Saskatchewan	G2		3.9	3.3	3.5	4.3						92.99	82.06	5.85	13.97
GID-116	AAC Awesome	Cultivar	CWSP	2016	2016-07-08	Regional Registration	Agriculture and Agri-Food Canada	G2		1.3	4.7	1.3	3	Yes					94.58	83.76	6.12	12.38
GID-117	GP168	Line	CWSP		Not registered		University of Alberta	G2		2	2.6	3.5	3.3	Yes	Yes				94.36	78.05	5.39	11.79
GID-118	Grandin	Cultivar	CWRS	1998	1998-02-28	Cancelled	Secan Association	G1		4.3	4.3	1.8	3.3						89.64	77.03	4.86	15.1
GID-119	Harvest	Cultivar	CNHR	2002	2002-06-21	Regional Registration	Farm Pure Seeds (ex SW Seed Canada Ltd)	G1		4.8	2.1	1	4.7		Yes	Yes			84.95	79.66	4.85	14.77
GID-120	Helios	Cultivar	CWRS	2006	2006-03-27	National Registration	Agriculture and Agri-Food Canada	G3		6.2	3.8	2.3	4.2						85.21	84.49	4.41	15.2
GID-121	CDC Cordon CLPlus	Cultivar	CNHR	2018	2018-11-09		University of Saskatchewan	G1		2.9	2.7	1.5	4.5		Yes				88.85	77.58	5.21	14.6
GID-122	SY Rowyn	Cultivar	CPSR	2016	2016-07-08	Regional Registration	Syngenta Canada Inc.	G2		2.4	2.2	7.3	6		Yes				92.37	72.54	5.22	15.16
GID-123	Prosper	Cultivar	CNHR	2018	2018-04-06	Regional Registration	Seed Depot Corp.	G1		2.6	2.2	2.5	3		Yes				90.19	84.9	3.89	15.88
GID-124	AAC Castle	Cultivar	CPSR	2018	2018-08-17		Agriculture and Agri-Food Canada	G2		1.7	1.9	1.3	3.2	Yes	Yes			Yes	93.38	74.63	4.97	16.63	Yes
GID-125	HY320	Cultivar	CPSR	1985	1985-01-23	Cancelled	Agriculture and Agri-Food Canada	G2		6.7	6.8	6.3	5.5						94.76	73.52	5.09	13.29
GID-126	Genesis	Cultivar	CPSW	1990	1990-03-26	Cancelled	Secan Association	G2		7.7	6.8	7.9	5.7						95.41	88.92	4.38	13.64
GID-127	CDC Terrain	Cultivar	CPSR	2016	2016-07-08		University of Saskatchewan	G2		2.2	3.3	1.5	4.2						89.91	79.28	4.8	14.22
GID-128	Infinity	Cultivar	CWRS	2004	2004-09-23	Regional Registration	Canterra Seeds	G3		5.4	2.8	2	3.7		Yes				88.76	83.12	4.13	15.88
GID-129	Invader	Cultivar	CWRS	1993	1993-05-25	Cancelled	Agricore United	G1		2.1	2	1.8	3.5		Yes				92.11	87.46	4.51	16.18
GID-130	Journey	Cultivar	CWRS	2002	2002-04-09	Regional Registration	Nutrien AG Solutions Inc.	G3		6.8	4	1.3	3.3						87.48	84.98	4.18	16.48
GID-131	Kanata	Cultivar	CWHWS	2006	2006-08-30	Regional Registration	Agriculture and Agri-Food Canada	G1		7.3	6.2	1.8	3.3						85.21	84.69	3.74	15.95
GID-132	Kane	Cultivar	CNHR	2006	2006-07-25	National Registration	Agriculture and Agri-Food Canada	G1		2.8	1.8	1	3.8		Yes	Yes		Yes	86.82	82.35	4.45	15.59
GID-133	Katepwa	Cultivar	CNHR	1981	1981-11-16	National Registration	Secan Association	G3		5.6	5.4	1.3	5.5						86.88	89.27	4.23	15.72
GID-134	Kenyon	Cultivar	CWRS	1985	1985-11-07	Cancelled	Secan Association	G3		3.6	3.3	1.3	5.5						87.09	90.03	3.82	15.6
GID-135	Lancer	Cultivar	CWRS	1985	1985-05-15	Cancelled	Secan Association	G3		4.1	4.6	2.3	4.8						88.33	90.49	3.78	17.25
GID-136	Laser	Cultivar	CWES	1999	1999-05-05	Regional Registration	University of Alberta	G2		6.4	6.5	7	6.8						86.1	87.06	4.66	15.89
GID-137	Laura	Cultivar	CWRS	1986	1986-12-23	National Registration	Secan Association	G3	Cb (Susceptible), Yr (moderately R)	2.7	1.4	5.5	5.7		Yes				90.41	82.58	3.94	16.42
GID-138	Leader	Cultivar	CNHR	1981	1981-03-25	National Registration	Secan Association	G3		4.8	5.1	2	4.3						88.06	87.68	3.72	17.18
GID-139	Lillian	Cultivar	CNHR	2003	2003-09-04	Regional Registration	Secan Association	G3	Yr (resistance)	1.3	4.1	1.5	4	Yes					86.81	84.37	4.28	16.22	Yes
GID-140	Lovitt	Cultivar	CWRS	2002	2002-11-08	Regional Registration	Canterra Seeds	G3		7.6	3.8	1	4			Yes			86.78	87.16	4.05	16.24	Yes
GID-141	Manitou	Cultivar	CWRS	1965	1965-02-22	Cancelled	Agriculture and Agri-Food Canada	G3		6	6.5	1.5	4.8						86.57	91.3	3.9	16.06
GID-142	Marquis	Cultivar	CWRS	1923	1923-01-01	Cancelled	Agriculture and Agri-Food Canada	G3		3.7	6.3	3.1	5.3						89.97	98.69	3.62	15.59
GID-143	McKenzie	Cultivar	CNHR	1997	1997-10-20	National Registration	Nutrien AG Solutions Inc.	G1	Cb (resistant) & Lr (moderate resistant)	6.4	2.9	1	5		Yes	Yes			84.05	83.07	4.3	15
GID-144	Minnedosa	Cultivar	CWSP	2009	2009-03-06	Regional Registration	Agriculture and Agri-Food Canada	G2		2.7	3.2	1.3	4.2						89.24	82.07	5.05	13.88
GID-145	Muchmore	Cultivar	CNHR	2009	2009-09-18	Regional Registration	Agriculture and Agri-Food Canada	G1		1.9	1.8	1	4	Yes	Yes	Yes		Yes	92.13	73.22	4.94	14.83
GID-146	Napayo	Cultivar	CWRS	1972	1972-04-05	Cancelled	Agriculture and Agri-Food Canada	G3		3.5	7.4	2	4.7						88.51	88.42	4.28	16.29
GID-147	Neepawa	Cultivar	CNHR	1969	1969-03-24	National Registration	Agriculture and Agri-Food Canada	G3	Cb (intermediate), Ls (moderately R)	6.3	6.8	1.5	4.8						87.63	88.76	4.18	15.82
GID-148	Oslo	Cultivar	CNHR	1987	1987-03-18	National Registration	Nutrien AG Solutions Inc.	G2		3.8	3.8	2.3	5						87.63	73.04	4.69	14.63
GID-149	Owens	Cultivar	CWSWS	1984	1984-07-31	Cancelled	No representative	G2		5.7	4	3	3.8						91.79	71.05	4.37	12.47
GID-150	Parata	Cultivar	CWRS	2015	2015-06-11	Regional Registration	University of Alberta	G1		2.4	2.4	1.3	5		Yes				85	83.39	4.24	16.51
GID-151	Park	Cultivar	CNHR	1963	1963-03-05	National Registration	Agriculture and Agri-Food Canada	G3		5.9	7.1	2.5	4.8						85.44	89.78	4.47	15.24
GID-152	Pasqua	Cultivar	CNHR	1990	1990-04-06	National Registration	Secan Association	G3		2.7	1	2.8	3.5		Yes				88.02	88.49	3.84	16.27
GID-153	Pasteur	Cultivar	CWSP	2011	2011-07-06	National Registration	Plantomar Ltd	G2		2.1	1	1.8	2.8		Yes		Yes	Yes	97.34	77.16	5.86	13.54
GID-154	Peace	Cultivar	CWRS	2004	2004-09-23	Regional Registration	Agriculture and Agri-Food Canada	G3		3.9	3.5	1	4.5			Yes			89.75	86.62	4.16	16.43
GID-155	Pembina	Cultivar	CNHR	1959	1959-11-23	National Registration	Agriculture and Agri-Food Canada	G3		6	6.7	2	4.7						84.38	90.16	4.14	15.02
GID-156	Pitic 62	Cultivar	CWES	1969	1969-01-14	Cancelled	No representative	G2		3.6	2	3	4.5		Yes				93.8	82.05	5.39	14.24
GID-157	Prodigy	Cultivar	CWRS	1998	1998-04-17	Regional Registration	Nutrien AG Solutions Inc.	G1		5.8	3.6	1.3	2.8				Yes		88.77	91.06	4.27	16.51
GID-158	AAC Tisdale	Cultivar	CWRS	2017	2017-08-18	Regional Registration	Agriculture and Agri-Food Canada	G1		5	1	1	3.8		Yes	Yes			87.85	79.98	4.62	16.43	Yes
GID-159	PT472	Line	CWRS		Not registered		Agriculture and Agri-Food Canada	G1		3.6	1.2	1.3	3.7		Yes				84.76	86.69	4.73	16.04	Yes
GID-160	PT479	Line	CWRS		Not registered		Agriculture and Agri-Food Canada	G3		2.6	1.4	1.8	4.3		Yes				89.83	86.16	4.75	16.47
GID-161	CDC Hughes	Cultivar	CWRS	2016	2016-04-29	Regional Registration	University of Saskatchewan	G1		3.8	3.9	2.5	5.3						87.28	79.08	5.07	16.11
GID-162	PT595	Line	CWRS		Not registered		University of Saskatchewan	G1		3.2	3.2	1	4.5			Yes			89.32	77.52	4.65	15.13
GID-163	PT771	Line	CWRS		Not registered		University of Alberta	G3		3.5	1.7	5.5	3.3		Yes				85.71	83.94	3.16	16.98
GID-164	PT778	Line	CWRS		Not registered		University of Alberta	G3		2.6	2.5	1.3	3.8		Yes				88.86	77.42	4.74	15.07
GID-165	PT780	Line	CWRS		Not registered		University of Alberta	G3		3.4	1	1.3	4.2		Yes				82.38	85.67	4.59	15.38
GID-166	Jake	Cultivar	CWRS	2018	2018-11-23	Regional Registration	University of Alberta	G3		1.8	1.7	2.3	2.2	Yes	Yes		Yes	Yes	85.45	80.7	4.51	16.98
GID-167	Rednet	Cultivar	CWRS	2018	2018-11-23	Regional Registration	University of Alberta	G3		1.3	2.3	4.8	3.5	Yes	Yes				91.93	88.55	4.61	16.3
GID-168	Ellerslie	Cultivar	CWRS	2018	2018-11-23	Regional Registration	University of Alberta	G3		1.4	2.6	6	5	Yes	Yes				88.86	81.28	4.85	15.48
GID-169	Tracker	Cultivar	CWRS	2018	2018-11-23	Regional Registration	University of Alberta	G3		1.6	1.5	1.5	2.5	Yes	Yes		Yes	Yes	86.61	80.41	4.9	15.53
GID-170	Red Bobs No. 222	Line			Exotic			G2		4.7	7.1	3.6	5.3						86.06	90.71	3.94	14.88
GID-171	RL6077	Line	CWRS		Not registered		Agriculture and Agri-Food Canada	G1		6.3	4.6	4.8	3.5						84.77	76.44	4.35	14.71
GID-172	Roblin	Cultivar	CWRS	1986	1986-05-13	National Registration	Secan Association	G3		4.6	4.6	2.5	5						84.63	84.41	3.89	16.54
GID-173	SAAR	Line			Exotic			G2		2.3	2.7	4	4.5		Yes				93.52	89.16	5.27	14.51
GID-174	Sadash	Cultivar	CWSWS	2007	2007-08-13	Regional Registration	Agriculture and Agri-Food Canada	G2		2.2	5.3	6.8	5.7						94.17	83.4	5.82	11.07
GID-175	Shaw	Cultivar	CWRS	2009	2009-12-02	Regional Registration	Agriculture and Agri-Food Canada	G3		1.9	3.2	1.5	3	Yes					87.37	90.22	4.62	14.93
GID-176	Sinton	Cultivar	CWRS	1975	1975-10-10	Cancelled	Agriculture and Agri-Food Canada	G3		2.3	4.6	2	4.2						90	91.11	4.51	15.39
GID-177	Snowbird	Cultivar	CWHWS	2004	2004-09-17	Regional Registration	Agriculture and Agri-Food Canada	G1		4.5	2.9	2.5	4.3		Yes				85.88	83.75	4.3	15.14
GID-178	Snowhite475	Cultivar	CPSW	2006	2006-04-28	Cancelled	Agriculture and Agri-Food Canada	G2		6.7	4.5	1.5	5						88.15	76.61	4.91	14.42
GID-179	Snowhite476	Cultivar	CPSW	2006	2006-05-05	Cancelled	Agriculture and Agri-Food Canada	G2		6.3	4.8	1.5	4.8						95.19	82.43	4.59	14.87
GID-180	Snowstar	Cultivar	CWHWS	2009	2009-05-15	National Registration	Agriculture and Agri-Food Canada	G1		7.4	4.6	3.5	5						85.7	77.08	4.41	14.7
GID-181	Somerset	Cultivar	CWRS	2005	2005-05-20	Regional Registration	Secan Association	G3		5.7	3	2.8	3.8						86.47	90.53	4.01	17.55	Yes
GID-182	Springfield	Cultivar	CWSWS	1972	1972-03-21	Cancelled	No representative	G2		6.9	7.3	5.4	6.2						89.33	72.64	3.68	14.42
GID-183	Stettler	Cultivar	CWRS	2008	2008-10-16	Regional Registration	Agriculture and Agri-Food Canada	G1		2.1	3.3	1	3.3			Yes			89.61	79.64	4.9	16.09
GID-184	Sumai 3	Line			Exotic			G2		3	4.4	6.6	5.8						91.99	93.51	3.54	16.23
GID-185	Superb	Cultivar	CWRS	2001	2001-04-12	National Registration	Agriculture and Agri-Food Canada	G1		5.1	4.6	1	3.8			Yes			89.49	79.84	5.24	14.71
GID-186	SWS52	Cultivar	CWSWS	1905	1905-06-11			G2		1.7	6.5	5.5	4.2	Yes					95.3	82.67	6.56	11.15
GID-187	SY087	Cultivar	CWSP	2014	2014-09-08	Regional Registration	Syngenta Canada Inc.	G1		2.7	1.4	1.3	3.7		Yes				89.33	80.7	5.33	14.48
GID-188	SY 433	Cultivar	CWRS	2012	2012-05-22	Regional Registration	Syngenta Canada Inc.	G1		3.7	2	1.5	3.7		Yes				88.12	72.88	4.81	16.03
GID-189	SY479 VB	Cultivar	CWRS	2016	2016-02-12	Regional Registration	Syngenta Canada Inc.	G1		3.2	3.9	1	2.3			Yes	Yes		87.83	88.76	4.43	17.09	Yes
GID-190	SY637	Cultivar	CWRS	2016	2016-02-12	Regional Registration	Syngenta Canada Inc.	G3		2.3	1	1	3		Yes	Yes		Yes	88.87	82.12	4.28	16.91
GID-191	SY985	Cultivar	CPSR	2011	2011-08-02	Regional Registration	Syngenta Canada Inc.	G2		1.9	2.4	2.5	3.3	Yes	Yes				91.03	79.68	4.93	15.13
GID-192	SY995	Cultivar	CPSR	2014	2014-09-08	Regional Registration	Syngenta Canada Inc.	G2		2.3	1.5	1	3.2		Yes	Yes		Yes	93.74	78.47	5.05	14.38
GID-193	Unity	Cultivar	CNHR	2007	2007-08-24	Regional Registration	Agriculture and Agri-Food Canada	G1		5.6	3.7	1.6	4						86.67	87.51	4.62	15.36
GID-194	Vesper	Cultivar	CNHR	2010	2010-11-15	Regional Registration	Secan Association	G1		6.8	3	4	4.8						87.76	81.93	4.98	14.89
GID-195	Waskada	Cultivar	CWRS	2007	2007-08-14	National Registration	Agriculture and Agri-Food Canada	G1		3.9	1.3	1.3	3.8		Yes				86.17	82.78	4.77	16.07
GID-196	Whitehawk	Cultivar	CWHWS	2012	2012-05-22	Regional Registration	Agriculture and Agri-Food Canada	G1		5	1.5	3.5	4.7		Yes				84.46	84.55	3.12	15.99
GID-197	Wildcat	Cultivar	CWES	1987	1987-02-10	National Registration	Secan Association	G2		3.9	4.1	6.8	5.2						94.42	81.47	4.5	12.76
GID-198	WR859 CL	Cultivar	CWRS	2009	2009-06-19	Regional Registration	Syngenta Canada Inc.	G3		3.7	2.3	1.8	3.7		Yes				87.18	79.47	4.58	15.81
	*Abbreviation:
	Canada Prairie Spring Red (CPSR)
	Canada Western Soft White Spring (CWSWS)
	Canada Northern Hard Red (CNHR)
	Canada Prairie Spring White (CPSW)
	Canada Western Extra Strong (CWES)
	Canada Western Hard White Spring (CWHWS)
	Canada Western Red Spring (CWRS)
	Canada Western Special Purpose (CWSP)

## Sheet: Table S2B
B) Summary of all cultivars and lines selected based on each disease (single-trait) and all diseases combined (multi-trait)
Genotype	Selected based on Cb (N=29)	Selected based on Lr (N=85)	Selected based on Ls (N=12)	Selected based on Yr (N=41)	Selected based on RLPSI	Comment
5604HR CL		Yes				Selected using one trait
5605HR CL		Yes	Yes		Yes	Selected based on two traits plus RLPSI
5700PR	Yes					Selected using one trait
5701PR		Yes		Yes	Yes	Selected based on two traits plus RLPSI
5702PR		Yes				Selected using one trait
AAC Awesome				Yes		Selected using one trait
AAC Bailey		Yes			Yes	Selected based on one trait plus RLPSI
AAC Brandon		Yes		Yes	Yes	Selected based on two traits plus RLPSI
AAC Castle		Yes		Yes	Yes	Selected based on two traits plus RLPSI
AAC Chiffon		Yes		Yes		Selected based on two traits
AAC Concord		Yes		Yes	Yes	Selected based on two traits plus RLPSI
AAC Connery	Yes			Yes	Yes	Selected based on two traits plus RLPSI
AAC Crossfield		Yes		Yes		Selected based on two traits
AAC Elie		Yes		Yes	Yes	Selected based on two traits plus RLPSI
AAC Entice		Yes		Yes		Selected based on two traits
AAC Foray		Yes				Selected using one trait
AAC Goodwin		Yes	Yes			Selected based on two traits
AAC Iceberg		Yes				Selected using one trait
AAC Penhold		Yes			Yes	Selected based on one trait plus RLPSI
AAC Redberry		Yes		Yes	Yes	Selected based on two traits plus RLPSI
AAC Redwater		Yes				Selected using one trait
AAC Ryley		Yes				Selected using one trait
AAC Tenacious		Yes		Yes		Selected based on two traits
AAC Tisdale	Yes	Yes				Selected based on two traits
AAC Viewfield		Yes				Selected using one trait
AC Andrew				Yes		Selected using one trait
AC Corinne		Yes		Yes		Selected based on two traits
AC Elsa		Yes		Yes		Selected based on two traits
AC Foremost	Yes					Selected using one trait
AC Intrepid		Yes				Selected using one trait
AC Meena		Yes				Selected using one trait
AC Minto	Yes					Selected using one trait
AC Taber	Yes					Selected using one trait
AC Vista	Yes					Selected using one trait
AC2000	Yes					Selected using one trait
Amazon				Yes		Selected using one trait
Bhishaj				Yes		Selected using one trait
Bluesky		Yes				Selected using one trait
Burnside		Yes	Yes	Yes		Selected based on three traits
BW1039		Yes				Selected using one trait
BW493		Yes				Selected using one trait
BW5020		Yes		Yes		Selected based on two traits
BYT14-11	Yes	Yes		Yes	Yes	Selected based on three traits plus RLPSI
Carberry		Yes		Yes	Yes	Selected based on two traits plus RLPSI
Cardale	Yes	Yes				Selected based on two traits
CDC Abound		Yes				Selected using one trait
CDC Alsask	Yes	Yes	Yes		Yes	Selected based on three traits plus RLPSI
CDC Bradwell		Yes			Yes	Selected based on one trait plus RLPSI
CDC Cordon CLPlus		Yes				Selected using one trait
CDC Go	Yes					Selected using one trait
CDC NRG003	Yes					Selected using one trait
CDC Osler		Yes				Selected using one trait
CDC Plentiful		Yes				Selected using one trait
CDC Rama				Yes		Selected using one trait
CDC Stanley		Yes				Selected using one trait
CDC Titanium		Yes		Yes		Selected based on two traits
CDC Utmost		Yes		Yes		Selected based on two traits
CDC VR Morris				Yes		Selected using one trait
CDC Walrus			Yes			Selected using one trait
CDC Whitewood		Yes				Selected using one trait
CDN Bison				Yes		Selected using one trait
Coleman		Yes		Yes		Selected based on two traits
Conquer				Yes		Selected using one trait
Ellerslie		Yes		Yes		Selected based on two traits
Enchant	Yes	Yes				Selected based on two traits
Faller			Yes			Selected using one trait
FL62R1		Yes				Selected using one trait
Glencross				Yes		Selected using one trait
Glenlea				Yes		Selected using one trait
Glenn		Yes				Selected using one trait
Go Early	Yes	Yes				Selected based on two traits
Goodeve		Yes				Selected using one trait
GP112	Yes	Yes	Yes	Yes	Yes	Selected based on all four traits plus RLPSI
GP168		Yes		Yes		Selected based on two traits
Harvest	Yes	Yes				Selected based on two traits
Infinity		Yes				Selected using one trait
Invader		Yes				Selected using one trait
Jake		Yes	Yes	Yes	Yes	Selected based on three traits plus RLPSI
Kane	Yes	Yes			Yes	Selected based on two traits plus RLPSI
Laura		Yes				Selected using one trait
Lillian				Yes		Selected using one trait
Lovitt	Yes					Selected using one trait
McKenzie	Yes	Yes				Selected based on two traits
Muchmore	Yes	Yes		Yes	Yes	Selected based on three traits plus RLPSI
Parata		Yes				Selected using one trait
Pasqua		Yes				Selected using one trait
Pasteur		Yes	Yes		Yes	Selected based on two traits plus RLPSI
Peace	Yes					Selected using one trait
Pitic 62		Yes				Selected using one trait
Prodigy			Yes			Selected using one trait
Prosper		Yes				Selected using one trait
PT472		Yes				Selected using one trait
PT479		Yes				Selected using one trait
PT595	Yes					Selected using one trait
PT771		Yes				Selected using one trait
PT778		Yes				Selected using one trait
PT780		Yes				Selected using one trait
Rednet		Yes		Yes		Selected based on two traits
SAAR		Yes				Selected using one trait
Shaw				Yes		Selected using one trait
Snowbird		Yes				Selected using one trait
Stettler	Yes					Selected using one trait
Superb	Yes					Selected using one trait
SWS52				Yes		Selected using one trait
SY 433		Yes				Selected using one trait
SY Chert	Yes	Yes				Selected based on two traits
SY Rowyn		Yes				Selected using one trait
SY087		Yes				Selected using one trait
SY479 VB	Yes		Yes			Selected based on two traits
SY637	Yes	Yes			Yes	Selected based on two traits plus RLPSI
SY985		Yes		Yes		Selected based on two traits
SY995	Yes	Yes			Yes	Selected based on two traits plus RLPSI
Tracker		Yes	Yes	Yes	Yes	Selected based on three traits plus RLPSI
Waskada		Yes				Selected using one trait
Whitehawk		Yes				Selected using one trait
WR859 CL		Yes				Selected using one trait
