# Supplementary material for: Identification of Disease Resistance Parents and Genome-Wide Association Mapping of Resistance in Spring Wheat
Source: Plants (Basel). 2022 Oct 28;11(21):2905. doi: 10.3390/plants11212905 (PMC9658635; doi:10.3390/plants11212905)
Supplement: Supplementary file 1 [file plants-11-02905-s001.zip › Table S3 Marker information.xlsx]

## Sheet: Sheet1
Table S3 Physical information, minor allele frequency, and proportion of missing data in the 23,342 polymorphic markers used in the present study. IWGSC RefSeq refers to the International Wheat Genome Sequencing Consortium reference sequence.
Marker	Chromosome based on IWGSC RefSeq v2.0	Physical position (bp) based on IWGSC RefSeq v2.0	Minor allele frequency before imputation	Proportion of missing before imputation (%)	Minor allele frequency after imputation	Proportion of missing after imputation (%)	Chromosome based on IWGSC RefSeq v1.0	Physical position (bp) based on IWGSC RefSeq v1.0
IAAV7260	1B	310865021	0.16667	3.125	0.16667	0
GluD1_wMAS000014	1D	414586618	0.15827	27.604	0.14583	0	1D
IAAV1930	1D	488719891	0.35849	17.188	0.35938	0
IAAV7492	2A	327328242	0.17204	3.125	0.16667	0
IAAV6409	2A	524318410	0.48947	1.042	0.49479	0
IAAV2376	2B	142972325	0.35632	9.375	0.33333	0
BS00022234_51	2D	18894449	0.30061	15.104	0.27083	0
IAAV3868	4D	68876129	0.09836	4.688	0.09375	0
Kukri_rep_c95804_119	5A	10538	0.49733	2.604	0.48438	0	5A	10538
Tdurum_contig42081_2942	5A	13187	0.3617	2.083	0.375	0	5A	13187
RAC875_c15745_124	5A	13932	0.1	1.042	0.09896	0	5A	13932
BS00034658_51	5B	20752	0.25414	5.729	0.26562	0	5B	20956
Kukri_c37738_417	1D	3183161	0.42138	17.188	0.39062	0	1D	85456
D_GB5Y7FA01DM80C_223	5D	764213	0.44828	9.375	0.49479	0	5D	96897
TA001594-0748	1B	6040068	0.36022	3.125	0.36458	0	1D	100105
CAP12_c3074_192	1D	3156789	0.40556	6.25	0.43229	0	1D	111828
RAC875_c6650_838	7B	114104	0.05291	1.562	0.05208	0	7B	114887
wsnp_CAP12_c4924_2241879	6B	6079837	0.4375	8.333	0.47917	0	6B	163934
Kukri_c21405_1015	6B	6081555	0.09043	2.083	0.10938	0	6B	165652
BS00082890_51	6B	6082010	0.1027	3.646	0.10938	0	6B	166106
Kukri_c21405_1705	6A	2052126	0.23889	6.25	0.26042	0	6B	166339
Kukri_c21405_2263	6A	2052684	0.1	1.042	0.10938	0	6B	166897
Excalibur_c28854_1580	6A	2052798	0.21788	6.771	0.25521	0	6B	167011
BS00030299_51	6A	2052988	0.1	1.042	0.10938	0	6B	167201
RAC875_c13610_1599	6A	2053373	0.33526	9.896	0.38542	0	6B	167586
RFL_Contig2424_2617	6B	6085135	0.22951	4.688	0.25521	0	6B	169233
BobWhite_c20959_229	6B	6085483	0.43827	15.625	0.39583	0	6B	169581
BS00000744_51	1D	3051805	0.22754	13.021	0.28646	0	1D	216812
CAP12_c8501_370	1D	3051681	0.05208	0	0.05208	0	1D	216936
BobWhite_c21669_430	1D	3051570	0.05236	0.521	0.05208	0	1D	217047
wsnp_JD_c3091_4079762	1D	3051570	0.3224	4.688	0.33854	0	1D	217047
Kukri_c1771_715	3B	1756909	0.19474	1.042	0.19792	0	3B	219506
Ra_c2467_333	5B	229209	0.47561	14.583	0.49479	0	5B	230728
Ku_c10387_272	5B	230379	0.17341	9.896	0.16146	0	5B	232178
Tdurum_contig10208_447	2A	261035	0.3883	2.083	0.39062	0	2A	260503
Tdurum_contig10208_452	2A	261040	0.38919	3.646	0.39062	0	2A	260508
wsnp_CAP11_rep_c4297_2028653	6D	798829	0.14439	2.604	0.14062	0	6A	287886
wsnp_Ex_rep_c68915_67808523	6A	119770	0.37209	10.417	0.38021	0	6A	288956
Tdurum_contig27939_98	6A	118210	0.1677	16.146	0.20312	0	6A	290516
D_GBUVHFX02JF485_58	7D	290546	0.06667	6.25	0.06771	0	7D	290546
RAC875_c7582_680	5D	520035	0.10405	9.896	0.11979	0	5D	344867
RAC875_c2070_893	1D	2851141	0.19101	7.292	0.1875	0	1D	417476
wsnp_Ex_c278_538158	1D	2851032	0.18421	1.042	0.18229	0	1D	417585
BobWhite_c359_1026	1D	2851000	0.05759	0.521	0.05729	0	1D	417617
wsnp_Ex_c278_538285	1D	2850905	0.20359	13.021	0.19271	0	1D	417712
RAC875_c2296_872	7B	424801	0.21925	2.604	0.21875	0	7B	427187
Kukri_c542_1538	7B	427278	0.15508	2.604	0.15625	0	7B	429664
BS00022562_51	7B	427880	0.15263	1.042	0.15104	0	7B	430266
tplb0062k24_584	3A	730859	0.37566	1.562	0.375	0	3A	432541
RAC875_c56484_249	3A	655374	0.34132	13.021	0.41146	0	3A	508026
Kukri_c36926_201	7A	528788	0.36126	0.521	0.36458	0	7A	534401
Excalibur_c17447_635	7A	528999	0.38919	3.646	0.375	0	7A	534612
Tdurum_contig11733_825	4B	1408455	0.34444	6.25	0.38542	0	4B	537238
Kukri_c7192_1128	1A	4375865	0.05208	0	0.05208	0	1D	573862
Kukri_c20775_56	1A	4380822	0.39227	5.729	0.375	0	1D	578986
Excalibur_c12254_2003	1D	2654548	0.37634	3.125	0.36979	0	1D	578992
RFL_Contig6075_1128	7B	603583	0.16043	2.604	0.16146	0	7B	605925
Kukri_c8500_968	6A	1717190	0.05	6.25	0.04688	0	6A	615012
BS00003772_51	6A	1738428	0.37195	14.583	0.33333	0	6A	618419
BS00056495_51	4B	1323529	0.36957	4.167	0.37696	0.521	4B	622405
Tdurum_contig44853_1083	6A	1725517	0.18848	0.521	0.1875	0	6A	631332
BS00082812_51	6A	1717516	0.3822	0.521	0.38542	0	6A	639333
Kukri_c8500_521	6A	1715081	0.09574	2.083	0.09375	0	6A	641706
BobWhite_c7114_237	5A	628507	0.48066	5.729	0.47917	0	5A	644275
BS00109912_51	7A	647685	0.37634	3.125	0.36458	0	7A	653899
BS00109911_51	7A	647743	0.19231	5.208	0.19271	0	7A	653957
BobWhite_c12144_216	2B	402375	0.39153	1.562	0.39062	0	2D	674115
Excalibur_c7903_1013	2B	403523	0.42553	2.083	0.42708	0	2D	675258
IAAV8205	2B	407051	0.39894	2.083	0.39583	0	2D	678909
BobWhite_c15236_450	6A	1668524	0.19663	7.292	0.19792	0	6A	689038
Ku_c5002_1541	6B	6626490	0.33526	9.896	0.37696	0.521	6B	699694
tplb0043j11_1190	4A	738249	0.48936	2.083	0.48958	0	4A	745627
BobWhite_c41542_354	5A	1543149	0.09043	2.083	0.08854	0	5B	757594
Ex_c13577_1303	7A	752243	0.37572	9.896	0.35938	0	7A	761352
Ex_c13577_632	7A	752914	0.35556	6.25	0.36458	0	7A	762023
IAAV6250	7A	753220	0.37838	3.646	0.36458	0	7A	762329
BS00108577_51	3D	3121693	0.37566	1.562	0.375	0	3D	773109
BS00108582_51	3D	3121585	0.32759	9.375	0.36979	0	3D	773217
Excalibur_c20559_98	3D	3120443	0.29825	10.938	0.375	0	3D	774359
IAAV2980	3D	3120285	0.375	0	0.375	0	3D	774517
Excalibur_c9485_351	3A	8941019	0.37234	2.083	0.375	0	3D	774603
RFL_Contig2815_1881	6A	1563673	0.39326	7.292	0.40625	0	6A	796293
RFL_Contig2815_1305	6A	1562069	0.16402	1.562	0.16146	0	6A	797897
RFL_Contig2815_1135	6A	1560649	0.44737	1.042	0.45312	0	6A	799317
RFL_Contig2815_660	6A	1559177	0.15	6.25	0.15625	0	6A	800789
Excalibur_c18072_76	6D	799184	0.12849	6.771	0.11979	0	6D	805504
BS00045156_51	3B	1098789	0.31847	18.229	0.30729	0	3B	877626
Excalibur_c35316_154	1B	3852786	0.46703	5.208	0.47917	0	1D	906988
Tdurum_contig12008_1001	3B	5710168	0.23656	3.125	0.24607	0.521	3D	928089
BS00081603_51	6A	1418546	0.48408	18.229	0.5	0	6A	942455
Kukri_rep_c116677_306	6A	1418233	0.15909	8.333	0.15104	0	6A	942768
Kukri_c11737_1241	6A	1417057	0.14894	2.083	0.15104	0	6A	943944
RAC875_c43871_154	3B	862026	0.38202	7.292	0.41667	0	3B	984052
RAC875_c43871_478	3B	861089	0.45263	1.042	0.45833	0	3B	984989
CAP12_rep_c3868_270	3B	859459	0.49133	9.896	0.45833	0	3B	986619
RAC875_c86104_111	4B	905315	0.46524	2.604	0.46354	0	4B	1047091
GENE-3126_21	4B	904347	0.09783	4.167	0.09896	0	4B	1048059
BS00066144_51	5B	6080844	0.26705	8.333	0.24479	0	5B	1155896
tplb0051e20_1160	1A	1158110	0.05789	1.042	0.05729	0	1A	1159874
Excalibur_c10657_796	1A	1172030	0.5	2.083	0.5	0	1A	1174185
Excalibur_c10657_1280	1A	1172732	0.48913	4.167	0.48958	0	1A	1174887
wsnp_Ex_c10657_17376086	1A	1174082	0.05236	0.521	0.05208	0	1A	1176237
wsnp_Ex_c10657_17376448	1A	1174999	0.42021	2.083	0.41667	0	1A	1177154
Excalibur_c3489_182	7B	1213735	0.05747	9.375	0.06771	0	7B	1203554
GENE-2935_850	7B	1213825	0.19663	7.292	0.18229	0	7B	1203644
RAC875_c20883_801	1A	1205388	0.05806	19.271	0.05208	0	1A	1207543
tplb0028p02_562	1A	1206149	0.05882	2.604	0.05729	0	1A	1208304
GENE-0014_822	1D	68157	0.3388	4.688	0.32984	0.521	1A	1211000
GENE-0014_317	1A	1208901	0.05208	0	0.05208	0	1A	1211056
GENE-0014_262	1A	1208948	0.05914	3.125	0.05729	0	1A	1211103
Excalibur_c94139_55	1A	1209534	0.06011	4.688	0.05729	0	1A	1211689
BS00090003_51	1A	1209598	0.05978	4.167	0.05729	0	1A	1211753
BS00022677_51	1A	1209780	0.06215	7.812	0.05729	0	1A	1211935
wsnp_Ex_c6209_10838456	5A	2066382	0.38587	4.167	0.375	0	5A	1225606
wsnp_Ex_c6209_10838852	5A	2067054	0.08556	2.604	0.08333	0	5A	1226278
Excalibur_c6644_1461	7D	1239647	0.12994	7.812	0.11979	0	7D	1228207
RAC875_c95364_59	1A	1232692	0.05263	1.042	0.05208	0	1A	1234847
RAC875_c42700_264	1A	1233647	0.06522	4.167	0.0625	0	1A	1235802
Kukri_c18951_493	1A	1233723	0.33333	9.375	0.30729	0	1A	1235878
RAC875_c38665_247	2B	9233667	0.35673	10.938	0.32812	0	2B	1251359
RAC875_c27611_467	2B	9233700	0.26738	2.604	0.27225	0.521	2B	1251392
Jagger_c5878_119	1B	1242735	0.46286	8.854	0.47396	0	1B	1254448
RAC875_c17182_600	7B	1264297	0.10811	3.646	0.11518	0.521	7B	1254625
Kukri_rep_c71778_644	7B	1264406	0.13228	1.562	0.13613	0.521	7B	1254734
Kukri_c46310_84	7B	1264893	0.31053	1.042	0.3125	0	7B	1255221
Kukri_c3734_400	7B	1265375	0.29947	2.604	0.30729	0	7B	1255703
Kukri_c3734_438	7B	1265388	0.3027	3.646	0.30208	0	7B	1255716
RAC875_rep_c105927_650	7B	1266171	0.30851	2.083	0.30729	0	7B	1256499
Kukri_c24488_431	3D	2627075	0.19553	6.771	0.20942	0.521	3D	1271764
Kukri_c4030_896	3D	2626883	0.4918	4.688	0.48438	0	3D	1271959
RAC875_c51781_795	3B	860729	0.36316	1.042	0.36979	0	3A	1307674
RAC875_c51781_771	3B	860727	0.45455	8.333	0.45312	0	3A	1307676
TA001137-1058	3B	860670	0.43636	14.062	0.48438	0	3A	1307733
wsnp_Ex_c326_636368	2B	11742607	0.48315	7.292	0.45833	0	2B	1316598
wsnp_Ex_c1996_3754394	2B	11887101	0.46842	1.042	0.46875	0	2B	1330803
Ra_c11464_294	2B	11728388	0.46597	0.521	0.46875	0	2B	1331325
Excalibur_c9509_1180	1A	1334889	0.06044	5.208	0.05729	0	1A	1337044
Kukri_c36351_64	1D	172371	0.32402	6.771	0.32984	0.521	1A	1337666
Kukri_rep_c68121_997	1A	1336028	0.05208	0	0.05208	0	1A	1338183
Excalibur_c4089_773	6A	1025762	0.25444	11.979	0.23438	0	6A	1338812
IAAV5306	1A	1337473	0.05789	1.042	0.05729	0	1A	1339628
Kukri_c2408_784	1A	1340488	0.32632	1.042	0.32984	0.521	1A	1342643
wsnp_Ra_c11211_18227610	1A	1341356	0.07051	18.75	0.05729	0	1A	1343511
Excalibur_c44612_474	1A	1344293	0.05208	0	0.05208	0	1A	1346448
RAC875_c65707_171	4B	1772164	0.42703	3.646	0.41361	0.521	4D	1372040
Kukri_c9210_997	4D	1364625	0.4	3.646	0.40314	0.521	4D	1372278
RAC875_c19718_227	4D	1365163	0.41711	2.604	0.40838	0.521	4D	1372816
RAC875_c19718_192	4D	1365198	0.40426	2.083	0.40314	0.521	4D	1372851
RAC875_c60861_95	7A	1424765	0.44624	3.125	0.46354	0	7A	1409524
wsnp_Ex_c4789_8550135	6D	1406680	0.06417	2.604	0.0625	0	6D	1415402
Kukri_c44369_131	1B	1407756	0.45251	6.771	0.45833	0	1B	1419836
BS00022020_51	1B	1409308	0.5	3.125	0.48438	0	1B	1421388
RAC875_c19751_166	1A	571386215	0.07368	1.042	0.07812	0		1484549
wsnp_Ra_rep_c69602_67107375	6A	2049659	0.20321	2.604	0.19792	0	6A	1494868
wsnp_JD_c1119_1642176	6B	6079837	0.34225	2.604	0.34896	0	6A	1494919
wsnp_Ex_c19430_28378386	6B	6082366	0.2	1.042	0.19792	0	6A	1497457
RAC875_c13610_1836	6D	2385726	0.09375	0	0.09375	0	6A	1499912
RAC875_c37871_249	6A	2054698	0.39326	7.292	0.39062	0	6A	1500170
wsnp_Ku_c21405_31157318	6A	2055343	0.19577	1.562	0.19271	0	6A	1500815
RAC875_c48669_292	1B	1511105	0.34637	6.771	0.32461	0.521	1B	1524032
RAC875_c48669_226	1B	1511456	0.05236	0.521	0.05208	0	1B	1524383
Excalibur_c49805_63	5D	1610297	0.28723	2.083	0.29167	0	5D	1614652
IAAV298	2D	1793440	0.22222	1.562	0.21875	0	2D	1669021
RAC875_c1553_129	7A	1719596	0.16754	0.521	0.16754	0.521	7A	1705065
BobWhite_c6791_588	7A	1729722	0.24074	15.625	0.27604	0	7A	1715191
BobWhite_c895_2385	7A	1733702	0.16931	1.562	0.16754	0.521	7A	1719171
Excalibur_c79516_137	7A	1737513	0.20126	17.188	0.16754	0.521	7A	1722982
Tdurum_contig5646_929	7A	1753794	0.20635	1.562	0.20419	0.521	7A	1739263
Kukri_c11260_559	7A	1754027	0.20968	3.125	0.20419	0.521	7A	1739496
BS00037421_51	7A	1754254	0.16754	0.521	0.16754	0.521	7A	1739723
BS00026702_51	7A	1757544	0.21081	3.646	0.20419	0.521	7A	1743013
Kukri_c88294_60	3D	2145162	0.20213	2.083	0.20942	0.521	3D	1754434
Excalibur_c10358_1800	6D	1762115	0.46032	1.562	0.45312	0	6D	1773348
BS00049420_51	3A	1866866	0.31915	2.083	0.33333	0	3A	1774474
Kukri_c109276_691	4B	1765298	0.40526	1.042	0.40314	0.521	4B	1776388
BobWhite_c9589_56	4B	1765572	0.40526	1.042	0.40314	0.521	4B	1776662
Kukri_c109276_397	4B	1765712	0.38378	3.646	0.40314	0.521	4B	1776802
BS00040127_51	4B	1767005	0.42553	2.083	0.42932	0.521	4B	1778095
GENE-3775_326	6D	1769169	0.32919	16.146	0.40104	0	6D	1781051
Excalibur_c46878_419	4B	1771450	0.46951	14.583	0.40314	0.521	4B	1782540
IAAV4600	4B	1776374	0.40741	1.562	0.40314	0.521	4B	1787464
D_contig02411_248	2D	1938174	0.0828	18.229	0.07292	0	2D	1815475
RAC875_c24030_136	4B	4651498	0.3764	7.292	0.36649	0.521	4D	1822765
BS00084668_51	2B	11228950	0.37356	9.375	0.34896	0	2B	1832757
Kukri_c46542_466	2B	11228541	0.30851	2.083	0.31771	0	2B	1833166
Kukri_c46542_1015	2B	11227992	0.47568	3.646	0.49479	0	2B	1833715
Excalibur_c21666_712	7A	1989756	0.19231	5.208	0.20419	0.521	7A	1847053
BS00036144_51	7D	2534751	0.20745	2.083	0.20419	0.521	7A	1849616
GENE-4739_457	7A	1993076	0.21348	7.292	0.20419	0.521	7A	1850373
IACX8438	6A	1416724	0.09091	2.604	0.10938	0	6D	1853587
IAAV1674	4D	1862477	0.37714	8.854	0.35417	0	4D	1876548
Excalibur_c34889_526	3D	1758695	0.23669	11.979	0.32292	0	3A	1922697
BobWhite_c11918_807	7A	2063947	0.16352	17.188	0.25	0	7A	1926153
Ex_c13871_694	1B	1926043	0.27778	6.25	0.26042	0	1B	1941237
Tdurum_contig51001_186	7D	2254135	0.20419	0.521	0.20419	0.521	7D	1962175
Tdurum_contig54776_1489	7D	2261084	0.27322	4.688	0.28646	0	7D	1969124
Tdurum_contig42590_755	7A	2127813	0.08065	3.125	0.08333	0	7A	1991105
Tdurum_contig42590_317	7A	2128634	0.21795	18.75	0.30208	0	7A	1991926
Kukri_c89383_69	3B	2165741	0.42515	13.021	0.375	0	3B	2028942
IAAV7221	4B	2022341	0.43085	2.083	0.43229	0	4B	2036612
TA003111-1095	4B	2022578	0.40741	1.562	0.40314	0.521	4B	2036849
Excalibur_c13572_1025	6A	1544464	0.07229	13.542	0.07812	0	6D	2047147
BobWhite_rep_c65669_295	6D	2032926	0.15344	1.562	0.15104	0	6D	2048024
RAC875_c16610_470	6D	2033074	0.46541	17.188	0.48958	0	6D	2048172
BobWhite_c5313_153	3D	1840339	0.29282	5.729	0.28646	0	3D	2064401
wsnp_Ku_c7822_13408189	1D	45554	0.42424	14.062	0.44792	0	1D	2091240
RAC875_c28630_250	7A	2227458	0.28415	4.688	0.27083	0	7A	2093469
RFL_Contig2815_1584	6A	1563282	0.45665	9.896	0.42708	0	6D	2102478
IAAV1917	1D	64994	0.15957	2.083	0.17188	0	1D	2111060
BS00012321_51	1D	65956	0.05096	18.229	0.05208	0	1D	2112022
wsnp_JD_c2128_2930150	5A	3029049	0.30159	1.562	0.30729	0	5A	2122307
wsnp_Ex_c3620_6612294	5A	3029401	0.28177	5.729	0.30729	0	5A	2122659
wsnp_Ex_c3620_6612231	5A	3029464	0.32597	5.729	0.3125	0	5A	2122722
Excalibur_c34889_451	3D	1758386	0.31361	11.979	0.35417	0	3D	2147628
Kukri_c3888_1478	1A	3061669	0.32941	11.458	0.34896	0	1A	2156559
BS00093036_51	6A	2725886	0.12644	9.375	0.13542	0	6A	2178279
BS00060773_51	3D	1711415	0.35849	17.188	0.32812	0	3D	2194220
wsnp_CAP11_c1827_988367	1A	592188870	0.27419	3.125	0.27604	0		2220604
RAC875_c63359_192	1A	592188685	0.23684	1.042	0.2356	0.521		2220789
Kukri_rep_c69829_735	1A	592188651	0.23034	7.292	0.21354	0		2220823
Kukri_rep_c69829_690	1A	592188606	0.24211	1.042	0.24607	0.521		2220868
Kukri_c8527_53	1A	592188408	0.09948	0.521	0.10417	0		2221066
wsnp_Ex_rep_c67492_66096650	1A	592188384	0.18421	1.042	0.18229	0		2221090
BS00074429_51	6A	2768237	0.07937	1.562	0.08333	0	6A	2221101
BS00076455_51	6A	2768239	0.08377	0.521	0.08333	0	6A	2221103
Kukri_rep_c69829_150	1A	592187963	0.22703	3.646	0.24084	0.521		2221511
Excalibur_rep_c67492_1119	1A	592187500	0.17708	0	0.17708	0		2221974
Kukri_c4204_1673	1A	592184847	0.17277	0.521	0.17708	0		2224627
RAC875_c10925_1887	1D	177339	0.32632	1.042	0.32984	0.521	1D	2224742
GENE-0543_113	1A	592184079	0.16402	1.562	0.17708	0		2225395
RAC875_c5119_2696	1A	592182775	0.16931	1.562	0.17708	0		2226699
Excalibur_c90130_313	1D	182320	0.24607	0.521	0.24479	0	1D	2229723
Excalibur_c12932_2102	1A	592179453	0.17708	0	0.17708	0		2230021
RAC875_c87324_202	6A	2780510	0.14054	3.646	0.14583	0	6A	2233691
Tdurum_contig28493_829	7D	2536262	0.25	2.083	0.24607	0.521	7D	2244334
Kukri_c80373_786	6A	2794382	0.49189	3.646	0.48438	0	6A	2247814
CAP8_c4805_295	6A	2794733	0.34375	0	0.34375	0	6A	2248165
BS00093317_51	6B	7699379	0.08511	2.083	0.08333	0	6A	2248485
RAC875_c82406_177	6D	2252041	0.45198	7.812	0.49479	0	6D	2268948
BobWhite_c30055_531	6D	2252187	0.18325	0.521	0.18229	0	6D	2269094
CAP7_c1208_150	6D	2252228	0.44149	2.083	0.44271	0	6D	2269135
CAP11_c1087_327	6A	1720127	0.12121	14.062	0.10938	0	6D	2271947
Tdurum_contig44344_346	3B	2415510	0.34857	8.854	0.36979	0	3B	2280600
Ex_c477_1253	6D	2303659	0.06077	5.729	0.05729	0	6D	2321102
RAC875_c2102_3487	6D	2304067	0.07609	4.167	0.07292	0	6D	2321510
RFL_Contig3621_1226	7D	2620321	0.20635	1.562	0.21354	0	7D	2328393
D_contig50905_592	4A	751585324	0.21311	4.688	0.2356	0.521	7D	2335066
RAC875_c41522_328	7D	2647728	0.25824	5.208	0.26042	0	7D	2355800
BS00100774_51	1A	3282304	0.19497	17.188	0.22917	0	1A	2378210
BS00070783_51	3D	1506798	0.06289	17.188	0.21354	0	3D	2400568
Ex_c69429_328	6A	2947443	0.12429	7.812	0.18229	0	6A	2402312
wsnp_Ex_c21633_30782312	6A	2947443	0.18519	1.562	0.18229	0	6A	2402312
RAC875_c6135_95	6A	2947646	0.24194	3.125	0.25	0	6A	2402515
Kukri_c143_1116	6A	2947750	0.05882	2.604	0.07292	0	6A	2402619
Kukri_c21405_2131	6D	2387759	0.4	1.042	0.39583	0	6D	2406212
wsnp_Ex_c14439_22426200	6D	2388265	0.34392	1.562	0.33854	0	6D	2406718
RAC875_rep_c69602_1119	6A	2050748	0.46196	4.167	0.47917	0	6D	2408028
wsnp_Ex_rep_c67563_66193104	6A	2050744	0.35638	2.083	0.34896	0	6D	2408032
TA002853-0110-w	6D	2390713	0.38421	1.042	0.38021	0	6D	2409166
BobWhite_rep_c67379_385	5A	3338576	0.1125	16.667	0.10417	0	5A	2429390
Tdurum_contig11802_864	2D	2590219	0.06806	0.521	0.06771	0	2D	2478927
IAAV32	2A	2547991	0.05914	3.125	0.05729	0	2A	2485633
Kukri_c17082_519	3B	2621445	0.46995	4.688	0.47396	0	3B	2487710
Kukri_c55362_75	6D	2469645	0.33529	11.458	0.33333	0	6D	2488964
RAC875_c26767_1321	3D	933638	0.25806	19.271	0.21875	0	3B	2513055
tplb0028p23_691	3A	1240677	0.24324	3.646	0.24479	0	3B	2519487
BobWhite_c6016_805	3B	2653469	0.25287	9.375	0.23958	0	3B	2519734
tplb0028p23_852	3B	2653528	0.24211	1.042	0.24479	0	3B	2519793
BS00098759_51	3B	2654316	0.38172	3.125	0.36979	0	3B	2520581
BS00032003_51	5B	3619021	0.34783	4.167	0.34375	0	5B	2559480
RAC875_c21801_1262	1B	24024433	0.22917	0	0.22917	0		2570698
Excalibur_c57482_242	3D	1314039	0.22751	1.562	0.23438	0	3D	2595406
Excalibur_c18826_452	3B	3524941	0.42138	17.188	0.34896	0	3D	2597073
JD_c15022_218	3A	1482088	0.41176	2.604	0.41667	0	3D	2623299
BS00080157_51	3A	1484370	0.20942	0.521	0.21354	0	3D	2625579
RAC875_c62483_112	3D	1283322	0.15819	7.812	0.16667	0	3D	2626373
RAC875_c29099_847	3A	1485904	0.13372	10.417	0.17708	0	3D	2627040
IAAV4876	3D	1282445	0.12849	6.771	0.14062	0	3D	2627250
Ex_c19516_3687	2A	3161674	0.28272	0.521	0.28125	0	2A	2640610
wsnp_Ex_c19516_28483751	2A	3161548	0.2619	12.5	0.34375	0	2A	2640736
wsnp_Ex_c19516_28483050	2D	3932051	0.35263	1.042	0.34896	0	2A	2641535
Kukri_c4698_3401	2A	3154853	0.05851	2.083	0.0625	0	2A	2647431
wsnp_Ex_c19516_28480622	2A	3149554	0.29379	7.812	0.31771	0	2A	2653095
wsnp_Ku_c10418_17237935	2D	3919543	0.26738	2.604	0.28125	0	2A	2653621
D_contig48217_226	7D	2974104	0.13158	1.042	0.13542	0	7D	2653741
Tdurum_contig29557_340	7A	2820919	0.12258	19.271	0.19792	0	7A	2687671
wsnp_Ex_c662_1301994	7A	2851050	0.19527	11.979	0.26178	0.521	7A	2717993
RAC875_c48445_317	7A	2851622	0.17964	13.021	0.20419	0.521	7A	2718565
BobWhite_c20735_255	7B	3118706	0.46316	1.042	0.45833	0	7B	2786881
JD_c21248_511	4A	2783641	0.05729	0	0.05729	0	4A	2791067
RAC875_c7828_598	7A	2959777	0.27922	19.792	0.26702	0.521	7A	2827776
RAC875_c42866_1323	7A	2961338	0.27128	2.083	0.26702	0.521	7A	2829337
RAC875_c42866_795	7A	2961866	0.26776	4.688	0.26702	0.521	7A	2829865
Excalibur_c34451_370	5A	3778767	0.45745	2.083	0.45833	0	5A	2875256
IAAV8808	6D	2889429	0.11236	7.292	0.10938	0	6D	2890994
Excalibur_c31801_752	6A	3731360	0.10695	2.604	0.11458	0	6A	2953376
BS00021687_51	3D	948400	0.36842	1.042	0.36979	0	3D	2967810
BS00037002_51	6A	3750617	0.5	2.083	0.49479	0	6A	2972633
Excalibur_c13833_570	5A	3873246	0.47368	1.042	0.46875	0	5A	2974077
RFL_Contig2549_565	3B	2652758	0.16292	7.292	0.21875	0	3D	2977473
BobWhite_c6016_214	3A	1237802	0.44693	6.771	0.41667	0	3D	2979972
wsnp_Ex_rep_c67619_66272209	2A	5085244	0.23899	17.188	0.27083	0	2A	3100663
wsnp_Ex_c11560_18632698	2A	5084225	0.29379	7.812	0.28125	0	2A	3101682
wsnp_Ex_c11560_18632777	2A	5084146	0.24859	7.812	0.28125	0	2A	3101761
Excalibur_rep_c66982_126	2A	5083996	0.25568	8.333	0.28125	0	2A	3101911
BS00023052_51	2A	5074780	0.16981	17.188	0.27604	0	2A	3111127
Kukri_c83523_57	1D	3317389	0.38415	14.583	0.34896	0	1D	3115624
BS00026456_51	1A	4111365	0.48352	5.208	0.46354	0	1A	3118374
RAC875_c8121_1997	4A	3111952	0.43503	7.812	0.45312	0	4A	3124941
RAC875_c701_800	4A	3118209	0.06211	16.146	0.11979	0	4A	3131198
RAC875_rep_c104905_148	7A	3284237	0.2439	14.583	0.25	0	7A	3155911
Kukri_c95189_124	5A	4079641	0.14917	5.729	0.15625	0	5A	3173730
Kukri_c28012_807	1B	3377095	0.11111	10.938	0.09896	0	1B	3177708
RAC875_rep_c113731_95	4A	624197020	0.1105	5.729	0.10417	0	1B	3178406
IACX4260	3A	1475867	0.2043	3.125	0.22917	0	3B	3228097
Kukri_c23591_522	3B	3487759	0.21053	1.042	0.20942	0.521	3B	3236988
BS00080158_51	3B	3489810	0.36628	10.417	0.41146	0	3B	3239039
RAC875_rep_c115090_51	3A	1483707	0.39785	3.125	0.41146	0	3B	3239533
Tdurum_contig50954_1264	3B	3491035	0.29586	11.979	0.26562	0	3B	3240264
RAC875_c29099_1366	3B	3491709	0.2033	5.208	0.20942	0.521	3B	3240938
Tdurum_contig50954_475	3B	3492251	0.13684	1.042	0.14583	0	3B	3241480
Tdurum_contig50954_394	3B	3492321	0.15957	2.083	0.16146	0	3B	3241550
Excalibur_c58555_110	1A	4249297	0.22283	4.167	0.23958	0	1A	3256305
RAC875_c30138_595	1A	4250858	0.33742	15.104	0.33854	0	1A	3257866
Kukri_c48951_419	1A	4251032	0.10651	11.979	0.10995	0.521	1A	3258040
Excalibur_c48057_110	3B	3510219	0.42473	3.125	0.4375	0	3B	3259776
BobWhite_c5611_281	3B	3524936	0.24294	7.812	0.22917	0	3B	3274496
Excalibur_c11601_231	3B	3525560	0.2	1.042	0.20312	0	3B	3275120
Tdurum_contig50596_708	3D	619361	0.37097	3.125	0.38021	0	3D	3298727
RAC875_c7727_864	3D	619148	0.34969	15.104	0.3125	0	3D	3298940
Kukri_c50527_241	3D	619035	0.36702	2.083	0.36979	0	3D	3299053
BobWhite_c18256_809	3D	618092	0.18919	3.646	0.21354	0	3D	3299996
BS00023068_51	2B	9701595	0.34054	3.646	0.34555	0.521	2B	3300157
RAC875_c7727_1458	3D	616686	0.24862	5.729	0.24607	0.521	3D	3309003
BS00089445_51	2A	5191320	0.38182	14.062	0.42708	0	2A	3334007
Tdurum_contig56157_1595	2A	5192356	0.30168	6.771	0.28125	0	2A	3335043
Jagger_c3075_99	7B	3667879	0.3617	2.083	0.35938	0	7B	3336782
Excalibur_c8486_419	7B	3669761	0.30435	4.167	0.29167	0	7B	3338664
BS00067742_51	1D	406591575	0.15	6.25	0.14583	0	2A	3354752
Kukri_c7192_1077	1B	4529448	0.22159	8.333	0.21875	0	1A	3382823
CAP7_rep_c7543_346	6B	140625	0.14917	5.729	0.1875	0	6B	3384218
CAP7_c10772_156	6B	140596	0.20225	7.292	0.21354	0	6B	3384247
BobWhite_rep_c49333_223	6B	139897	0.18478	4.167	0.20312	0	6B	3384946
wsnp_Ex_c12254_19574891	1D	2655866	0.11828	3.125	0.13021	0	1A	3386505
tplb0025b13_2879	1A	4379544	0.05208	0	0.05208	0	1A	3386553
tplb0025b13_2792	1A	4379872	0.37725	13.021	0.40104	0	1A	3386881
tplb0025b13_2687	1A	4379977	0.38462	5.208	0.375	0	1A	3386986
Kukri_c1818_2671	1A	4380421	0.05208	0	0.05208	0	1A	3387430
tplb0025b13_2372	1A	4380658	0.05236	0.521	0.05208	0	1A	3387667
tplb0025b13_2054	1A	4380976	0.31351	3.646	0.30208	0	1A	3387985
wsnp_Ku_c1818_3557408	1A	4383342	0.12632	1.042	0.13542	0	1A	3390351
Kukri_c64744_1087	4D	3382788	0.28729	5.729	0.27083	0	4D	3395940
Excalibur_rep_c104815_1181	5A	4306378	0.28877	2.604	0.29167	0	5A	3402350
wsnp_Ex_c30368_39293103	3B	4895843	0.4759	13.542	0.41667	0	3B	3410857
wsnp_Ku_c1629_3206989	3B	4895678	0.35227	8.333	0.34896	0	3B	3411022
Excalibur_rep_c71060_78	3B	4895551	0.34463	7.812	0.34896	0	3B	3411149
Excalibur_c24634_330	3B	4895188	0.20526	1.042	0.20942	0.521	3B	3411512
Kukri_c9479_2054	7A	3539051	0.18713	10.938	0.20419	0.521	7A	3414018
BS00077946_51	7A	3539343	0.18605	10.417	0.20419	0.521	7A	3414310
BS00063558_51	7A	3539624	0.19048	12.5	0.20419	0.521	7A	3414591
BS00063002_51	7A	3540187	0.17647	11.458	0.19372	0.521	7A	3415154
RAC875_c11156_137	7A	3540253	0.11392	17.708	0.26562	0	7A	3415220
BS00061123_51	7A	3540801	0.18605	10.417	0.20419	0.521	7A	3415768
BS00029357_51	7A	3550336	0.27128	2.083	0.27083	0	7A	3425303
BS00108770_51	4D	3416888	0.18354	17.708	0.20833	0	4D	3430040
BS00021716_51	4A	3427537	0.09392	5.729	0.08854	0	4A	3442892
BS00106545_51	4A	3429801	0.10494	15.625	0.08854	0	4A	3445156
wsnp_JD_c64_103934	4D	467577212	0.08466	1.562	0.08333	0	4A	3445191
wsnp_CAP12_c720_382116	6D	3443852	0.25698	6.771	0.24479	0	6D	3445417
BobWhite_c4246_367	1A	4442182	0.41935	3.125	0.41667	0	1A	3449191
BS00110078_51	4B	3537454	0.14535	10.417	0.1875	0	4B	3453216
Excalibur_c36398_69	6D	3540668	0.15569	13.021	0.14583	0	6D	3488925
GENE-3324_338	5A	4424172	0.19474	1.042	0.19271	0	5A	3521325
RAC875_c10555_178	7B	3870950	0.33333	4.688	0.35417	0	7B	3541228
BS00022127_51	7B	3871262	0.35263	1.042	0.34896	0	7B	3541540
BS00011513_51	6D	3641455	0.42105	10.938	0.43229	0	6D	3589712
Excalibur_c386_894	2A	5450463	0.32787	4.688	0.32292	0	2A	3595107
Excalibur_rep_c71645_94	3B	4703100	0.32927	14.583	0.3125	0	3B	3605959
BS00000020_51	5D	3623011	0.42105	1.042	0.41667	0	5D	3609944
Kukri_c15720_884	4D	3710755	0.26404	7.292	0.26562	0	4D	3611161
BobWhite_c23992_300	5D	3647115	0.07937	1.562	0.07812	0	5D	3633879
BobWhite_c5793_372	1A	4644562	0.31217	1.562	0.31771	0	1A	3654299
BS00011810_51	1B	3852755	0.07143	5.208	0.07812	0	1B	3657872
Excalibur_c35316_137	1B	3852768	0.36898	2.604	0.36458	0	1B	3657885
IAAV1902	7B	4017659	0.34737	1.042	0.35417	0	7B	3689369
BS00003845_51	5B	24546845	0.12883	15.104	0.10938	0	5A	3699114
CAP12_rep_c4079_97	7B	4028533	0.36413	4.167	0.36458	0	7B	3700321
wsnp_JD_c1285_1848292	7B	4028683	0.36667	6.25	0.36458	0	7B	3700471
BobWhite_c47269_128	7B	4029913	0.37079	7.292	0.35938	0	7B	3701701
Tdurum_contig42083_890	4A	599697640	0.27749	0.521	0.27604	0	4D	3725749
Kukri_c6784_718	5A	4615914	0.18519	1.562	0.18229	0	5A	3726262
Ex_c350_344	6D	4786256	0.22807	10.938	0.22396	0	6D	3726681
RAC875_c215_384	4B	4651035	0.49451	5.208	0.49215	0.521	4B	3732798
Excalibur_c15851_590	6A	4541787	0.4386	10.938	0.46875	0	6A	3746466
Ra_c491_902	2B	11887151	0.46032	1.562	0.46875	0	2B	3773083
RAC875_c67463_324	6A	4568524	0.29843	0.521	0.29688	0	6A	3773203
RAC875_c67463_300	6A	4568548	0.34254	5.729	0.33854	0	6A	3773227
BS00110353_51	6A	4569343	0.42442	10.417	0.41667	0	6A	3774022
Kukri_c6306_685	2A	3149878	0.22222	6.25	0.24607	0.521	2D	3775010
TA001286-0611-w	1B	5459499	0.48333	6.25	0.48958	0	1A	3777195
wsnp_Ra_c1660_3275687	2B	11903984	0.42935	4.167	0.45312	0	2B	3789916
BS00076402_51	7B	4121848	0.27895	1.042	0.28125	0	7B	3794526
Tdurum_contig25857_274	7B	4122706	0.26344	3.125	0.28125	0	7B	3795384
Kukri_c55922_352	7B	4123562	0.23034	7.292	0.28125	0	7B	3796240
Kukri_c55951_219	2A	5648114	0.44505	5.208	0.46597	0.521	2A	3797519
Kukri_c55951_97	2A	5648581	0.47222	6.25	0.47644	0.521	2A	3797986
RAC875_c34512_493	2A	5648616	0.46561	1.562	0.46597	0.521	2A	3798021
Excalibur_c12085_276	6A	4466632	0.36413	4.167	0.375	0	6D	3820121
BS00066054_51	7A	3961985	0.05291	1.562	0.05729	0	7A	3841437
Kukri_c58589_402	7A	3964413	0.31977	10.417	0.29688	0	7A	3843865
Tdurum_contig10861_942	7B	4175456	0.28272	0.521	0.28125	0	7B	3848701
RFL_Contig801_2124	7B	4175671	0.27895	1.042	0.28125	0	7B	3848916
Tdurum_contig47143_1413	7A	3969608	0.14907	16.146	0.17188	0	7A	3849060
wsnp_Ku_c24391_34351602	6A	4646684	0.37569	5.729	0.36979	0	6A	3851363
wsnp_RFL_Contig3512_3672726	6A	4646838	0.09945	5.729	0.11458	0	6A	3851517
wsnp_BE496826A_Ta_2_2	6A	4648123	0.26506	13.542	0.33333	0	6A	3852802
RFL_Contig2163_1080	6D	4660161	0.05952	12.5	0.14062	0	6D	3853247
Excalibur_c94362_397	2A	5705922	0.38503	2.604	0.38021	0	2A	3856168
Kukri_c1620_779	7D	4231004	0.24405	12.5	0.24479	0	7D	3858205
Tdurum_contig30760_271	4B	5045920	0.06936	9.896	0.0625	0	4B	3860891
Ku_c2478_227	4A	3851954	0.05263	1.042	0.05208	0	4A	3868779
Tdurum_contig61178_618	6B	5276546	0.22951	4.688	0.25521	0	6B	3883903
Tdurum_contig81191_342	6B	5274960	0.23684	1.042	0.23958	0	6B	3885489
Tdurum_contig43538_648	6B	5273184	0.5	6.25	0.49479	0	6B	3887265
Tdurum_contig43538_1111	6B	5271753	0.36508	1.562	0.36979	0	6B	3888696
Tdurum_contig43538_1306	6B	5271558	0.44886	8.333	0.49479	0	6B	3888891
Excalibur_c96134_152	6B	5271378	0.3871	3.125	0.38542	0	6B	3889071
Excalibur_c96134_182	6B	5271348	0.38743	0.521	0.38542	0	6B	3889101
Tdurum_contig43538_1582	6B	5271282	0.5	1.042	0.49479	0	6B	3889167
Tdurum_contig43538_1687	6B	5271177	0.38624	1.562	0.38542	0	6B	3889272
Tdurum_contig43538_1812	6B	5271052	0.48404	2.083	0.49479	0	6B	3889397
Kukri_c15654_309	3A	7339280	0.09884	10.417	0.09896	0	3B	3904298
Tdurum_contig52015_1695	7A	4027086	0.44086	3.125	0.44792	0	7A	3906863
RAC875_c22338_750	7A	4027246	0.1954	9.375	0.26562	0	7A	3907023
Tdurum_contig52015_1440	7A	4027449	0.18079	7.812	0.16754	0.521	7A	3907226
Tdurum_contig52015_1320	7A	4027557	0.45161	3.125	0.4375	0	7A	3907334
RAC875_c22338_432	7A	4027820	0.26455	1.562	0.27083	0	7A	3907597
Tdurum_contig52015_1090	7A	4028072	0.44444	1.562	0.4375	0	7A	3907849
Tdurum_contig52015_870	7A	4028279	0.44324	3.646	0.44271	0	7A	3908056
RFL_Contig1460_693	7A	4030208	0.32973	3.646	0.33333	0	7A	3909985
RFL_Contig1460_645	7A	4030380	0.13483	7.292	0.1875	0	7A	3910157
TA004832-0873	5D	2139641	0.48864	8.333	0.46875	0	5B	3919332
RAC875_c98242_422	6D	4571660	0.22043	3.125	0.21875	0	6D	3942522
Kukri_c73802_205	6D	4571646	0.21277	2.083	0.21875	0	6D	3942536
BS00058604_51	1D	4164402	0.13772	13.021	0.13542	0	1D	3957689
BS00022665_51	2A	5811999	0.11413	4.167	0.14583	0	2A	3962492
BS00003735_51	2A	5812011	0.06316	1.042	0.0625	0	2A	3962504
CAP8_c2783_336	2A	5814721	0.45251	6.771	0.42708	0	2A	3965214
Kukri_c2465_1892	1D	4178068	0.13333	6.25	0.13542	0	1D	3971355
Tdurum_contig81608_63	7A	4102736	0.26702	0.521	0.26562	0	7A	3982967
BS00095826_51	7A	4103239	0.28571	1.562	0.29167	0	7A	3983470
BobWhite_c2453_253	3D	3978109	0.33149	5.729	0.35417	0	3D	3989923
RAC875_rep_c114981_245	7A	3962685	0.15135	3.646	0.14583	0	7D	4008661
Kukri_c4650_672	7D	4377315	0.1413	4.167	0.15104	0	7D	4008714
Kukri_c22088_62	7D	4384166	0.12778	6.25	0.13021	0	7D	4015793
IACX2941	1A	5032803	0.05914	3.125	0.05729	0	1A	4047962
BS00082566_51	1A	5038240	0.05914	3.125	0.05729	0	1A	4053399
BS00082567_51	1A	5038357	0.41989	5.729	0.43229	0	1A	4053516
BobWhite_c20902_177	1A	5048004	0.17895	1.042	0.18229	0	1A	4063163
RAC875_c11702_733	7D	4440840	0.16304	4.167	0.16754	0.521	7D	4072537
BS00013935_51	6A	4868971	0.30811	3.646	0.29688	0	6A	4073650
IAAV5385	6B	5033725	0.34973	4.688	0.35938	0	6B	4128050
BobWhite_c39269_243	5A	5042938	0.31875	16.667	0.28646	0	5A	4131730
Kukri_c7791_99	4D	4232373	0.18325	0.521	0.18229	0	4D	4131899
Tdurum_contig49804_392	3B	4167205	0.31868	5.208	0.33333	0	3B	4141944
BS00001335_51	3B	4167105	0.31522	4.167	0.33333	0	3B	4142044
RFL_Contig3008_1870	3B	4166822	0.46512	10.417	0.41667	0	3B	4142327
RFL_Contig3008_1177	3B	4164335	0.41361	0.521	0.41146	0	3B	4144814
D_GDEEGVY01EG2MJ_349	6D	4363203	0.28824	11.458	0.25521	0	6D	4151921
Kukri_c22152_730	2A	6059999	0.42553	2.083	0.41667	0	2A	4213361
wsnp_Ex_c11950_19164191	2A	6062904	0.40314	0.521	0.40104	0	2A	4216266
wsnp_Ex_c11950_19164041	2A	6063010	0.40314	0.521	0.40104	0	2A	4216372
BS00097200_51	7D	4634990	0.09341	5.208	0.13021	0	7D	4268351
tplb0027d07_1388	7D	4635320	0.30319	2.083	0.30729	0	7D	4268681
tplb0027d07_633	7D	4636249	0.2067	6.771	0.19271	0	7D	4269610
Excalibur_c53680_124	6D	4235917	0.16561	18.229	0.13542	0	6D	4280638
Excalibur_c25276_314	6D	4235098	0.06952	2.604	0.06771	0	6D	4281457
RAC875_c78607_75	6D	4234535	0.22941	11.458	0.25	0	6D	4282020
Kukri_c9310_156	6A	3508485	0.18497	9.896	0.22917	0	6D	4282077
wsnp_Ra_rep_c106727_90434958	2B	12398559	0.46341	14.583	0.46875	0	2B	4284941
Kukri_c38985_537	2A	6156354	0.28022	5.208	0.27749	0.521	2A	4309716
Excalibur_c15165_367	1A	4249141	0.06587	13.021	0.05729	0	1B	4320724
Kukri_c79308_278	1B	4508143	0.32432	3.646	0.32292	0	1B	4320839
BS00022504_51	1B	4532959	0.23529	2.604	0.25521	0	1B	4345655
BS00083177_51	1B	4536876	0.34426	4.688	0.34375	0	1B	4349572
Excalibur_c59428_270	2D	4525106	0.2766	2.083	0.28125	0	2D	4387197
Excalibur_c59428_237	2D	4525139	0.19876	16.146	0.27604	0	2D	4387230
Excalibur_c34600_292	2D	4525587	0.3375	16.667	0.28125	0	2D	4387678
Kukri_c12401_301	3D	4377091	0.2625	16.667	0.28796	0.521	3D	4394820
RAC875_rep_c72743_51	2B	12539217	0.17127	5.729	0.17188	0	2B	4425599
RAC875_rep_c109471_154	2B	12539323	0.47283	4.167	0.46354	0	2B	4425705
RAC875_rep_c115433_378	2B	12539759	0.45055	5.208	0.45312	0	2B	4426141
RAC875_c14173_207	7A	4549261	0.14535	10.417	0.13542	0	7A	4430028
BS00022146_51	7A	4549272	0.07547	17.188	0.07292	0	7A	4430039
Kukri_c42622_417	7A	4549402	0.15934	5.208	0.16754	0.521	7A	4430169
Kukri_c42622_687	7A	4549672	0.14917	5.729	0.16754	0.521	7A	4430439
BobWhite_c16792_586	7A	4549942	0.17949	18.75	0.16754	0.521	7A	4430709
BS00086801_51	7A	4551068	0.18436	6.771	0.17188	0	7A	4431835
Kukri_c32803_150	3B	3878214	0.08642	15.625	0.08854	0	3B	4433570
IAAV4862	2B	6902023	0.24064	2.604	0.25	0	2D	4464053
BS00062677_51	3B	3843071	0.13158	1.042	0.13021	0	3B	4468969
BS00064776_51	3B	3843006	0.08511	2.083	0.08333	0	3B	4469034
BS00014831_51	1B	4936726	0.30055	4.688	0.30208	0	1B	4478849
Excalibur_c11824_103	3D	4469488	0.21622	3.646	0.20942	0.521	3D	4486833
Excalibur_rep_c67048_452	3D	4470504	0.20635	1.562	0.20942	0.521	3D	4487849
Kukri_rep_c69028_999	3A	10460020	0.19786	2.604	0.20942	0.521	3D	4488134
Kukri_rep_c69028_1674	3A	10460695	0.21053	1.042	0.20942	0.521	3D	4488809
Kukri_rep_c68923_216	3D	4473407	0.21164	1.562	0.20942	0.521	3D	4490757
Excalibur_c1209_983	7D	4880427	0.07568	3.646	0.07292	0	7D	4516012
Excalibur_c1209_935	7D	4880475	0.09945	5.729	0.13542	0	7D	4516060
Excalibur_c1209_755	7D	4880655	0.13089	0.521	0.13542	0	7D	4516240
BobWhite_c16792_432	7D	4881377	0.16484	5.208	0.17277	0.521	7D	4516962
RAC875_c26706_504	7D	4881916	0.15957	2.083	0.16754	0.521	7D	4517501
BS00029434_51	6B	4433251	0.43182	8.333	0.47644	0.521	6B	4518534
BS00106142_51	4B	7257180	0.15426	2.083	0.15104	0	4B	4537310
IAAV2216	4A	4568186	0.07368	1.042	0.07292	0	4A	4595509
Tdurum_contig17697_675	1B	5058642	0.41622	3.646	0.42708	0	1B	4601332
BS00069271_51	4A	4592710	0.06771	0	0.06771	0	4A	4620035
Excalibur_c28315_237	7A	4745566	0.1746	1.562	0.17188	0	7A	4628988
RAC875_c63420_397	7D	4996429	0.13772	13.021	0.11979	0	7D	4632014
BS00111202_51	7D	4996450	0.16754	0.521	0.16667	0	7D	4632035
RAC875_c57371_238	6D	3884717	0.24868	1.562	0.24479	0	6D	4635414
wsnp_JD_c640_960796	2B	12783539	0.36875	16.667	0.33333	0	2B	4644552
Excalibur_c32789_440	2D	8468852	0.32804	1.562	0.32812	0	2B	4645546
BS00064392_51	2A	6573251	0.26036	11.979	0.32812	0	2A	4646467
Kukri_c40204_617	2B	12802065	0.28796	0.521	0.28646	0	2B	4663333
Kukri_c30847_344	2B	12802929	0.28272	0.521	0.28646	0	2B	4664197
Kukri_c30847_551	2A	8336090	0.27528	7.292	0.32812	0	2B	4664485
RAC875_c5969_173	4D	4868233	0.34783	4.167	0.35938	0	4D	4761348
RAC875_c8041_788	4A	597389507	0.09412	11.458	0.13021	0	4D	4762287
GENE-4226_690	6D	4908583	0.11834	11.979	0.21354	0	6D	4775122
BobWhite_rep_c52808_186	6D	4908649	0.23977	10.938	0.21875	0	6D	4775188
wsnp_Ex_c997_1906900	2A	6713924	0.37037	1.562	0.36458	0	2A	4787118
wsnp_Ku_c33374_42877546	2A	6716804	0.37222	6.25	0.40625	0	2A	4789998
Kukri_c33374_1048	2A	6717140	0.41176	2.604	0.40625	0	2A	4790334
Excalibur_c10406_1949	2A	6719504	0.4918	4.688	0.48438	0	2A	4792698
IAAV824	7D	5174613	0.34463	7.812	0.39583	0	7D	4811071
RAC875_rep_c112807_403	2A	6765656	0.20942	0.521	0.21354	0	2A	4838850
wsnp_Ex_c16551_25061517	5A	6014755	0.17895	1.042	0.17708	0	5A	4848394
wsnp_Ex_c16551_25060833	5A	6015819	0.17895	1.042	0.17708	0	5A	4849458
IAAV1592	5A	6015827	0.16129	3.125	0.17708	0	5A	4849466
tplb0025f09_1853	4B	6946491	0.28649	3.646	0.27604	0	4B	4850018
RAC875_c94519_419	4A	599699347	0.28415	4.688	0.27604	0	4B	4850146
Ra_c2139_968	5A	6016551	0.17368	1.042	0.17708	0	5A	4850190
Ra_c2139_967	5A	6016552	0.1746	1.562	0.17708	0	5A	4850191
wsnp_BF474606A_Td_2_1	5A	6016853	0.16848	4.167	0.17708	0	5A	4850492
IAAV5087	5A	6016957	0.18085	2.083	0.17708	0	5A	4850596
tplb0025f09_1052	4B	6945164	0.29121	5.208	0.27604	0	4B	4851345
tplb0025f09_973	4B	6945094	0.29609	6.771	0.27604	0	4B	4851415
Tdurum_contig42083_757	4B	6944419	0.29213	7.292	0.27604	0	4B	4852090
Tdurum_contig5427_314	4B	6943942	0.27749	0.521	0.27604	0	4B	4852567
IACX5923	6B	4076324	0.10582	1.562	0.10938	0	6B	4875460
wsnp_Ku_c26585_36553202	6A	1416437	0.17576	14.062	0.15625	0	6B	4875527
BS00010580_51	6A	1417909	0.46497	18.229	0.43229	0	6B	4876987
RAC875_c8714_653	7A	5013025	0.17919	9.896	0.23438	0	7A	4892775
TA002254-0660	2A	6827683	0.05319	2.083	0.05208	0	2A	4900877
wsnp_Ex_c52259_55922750	7B	5234871	0.24841	18.229	0.28125	0	7B	4901535
Tdurum_contig98005_272	7B	5241464	0.26984	1.562	0.28125	0	7B	4908128
tplb0062k22_1152	7B	5242358	0.31361	11.979	0.29688	0	7B	4909022
Tdurum_contig61255_86	7B	5242446	0.28421	1.042	0.28125	0	7B	4909110
RAC875_c5577_1682	2A	6876893	0.32768	7.812	0.32984	0.521	2A	4950087
GENE-1230_189	2A	6878596	0.33511	2.083	0.32984	0.521	2A	4951790
BS00022116_51	5A	6123781	0.23656	3.125	0.22917	0	5A	4958643
Excalibur_rep_c113131_624	4D	5083696	0.33766	19.792	0.29167	0	4D	4978383
Tdurum_contig12123_1650	4D	5084590	0.43452	12.5	0.42708	0	4D	4979277
Excalibur_c45695_253	3D	4962645	0.17778	6.25	0.20312	0	3D	4984882
Excalibur_c34937_710	2B	8699353	0.18617	2.083	0.19271	0	2B	4988254
RAC875_c37592_426	7D	5351640	0.06349	1.562	0.0625	0	7D	4988813
Kukri_rep_c110389_569	2B	8697787	0.3865	15.104	0.38542	0	2B	4989820
RAC875_rep_c71112_400	2B	8697134	0.33508	0.521	0.33508	0.521	2B	4990473
RAC875_c8714_1139	7D	5354295	0.24599	2.604	0.25	0	7D	4991468
Excalibur_c50999_269	7D	5357776	0.17277	0.521	0.17708	0	7D	4994948
BS00064188_51	5A	6163244	0.19022	4.167	0.1875	0	5A	4997910
RAC875_c76611_364	3D	4977132	0.43956	5.208	0.46875	0	3D	4999381
BS00023130_51	1A	6068661	0.05759	0.521	0.05729	0	1A	5024184
RAC875_c50694_285	6A	6344221	0.15517	9.375	0.15104	0	6A	5039230
Kukri_c37227_154	7D	5410900	0.38251	4.688	0.40625	0	7D	5049064
Excalibur_rep_c99143_422	6D	5189568	0.21591	8.333	0.20833	0	6D	5059210
Tdurum_contig49737_462	7B	5393678	0.18325	0.521	0.18229	0	7B	5060578
RAC875_c55351_223	7A	5204007	0.48663	2.604	0.48958	0	7A	5084542
Ra_c22558_437	6D	5280375	0.49112	11.979	0.43229	0	6D	5151091
Jagger_c1888_277	1B	5614864	0.10857	8.854	0.09896	0	1B	5159823
BobWhite_c4838_58	5D	5946774	0.1875	16.667	0.18229	0	5D	5170708
Kukri_c6091_327	7D	5535224	0.21466	0.521	0.21354	0	7D	5174481
BS00082565_51	1B	5630895	0.19318	8.333	0.26042	0	1B	5175854
Kukri_rep_c68823_696	6D	5307459	0.45763	7.812	0.44792	0	6D	5178489
RAC875_rep_c70499_703	6A	5027063	0.06742	7.292	0.06771	0	6D	5179286
RAC875_c38350_106	7D	5559560	0.0678	7.812	0.06771	0	7D	5198849
Excalibur_c46904_84	7D	5559623	0.15847	4.688	0.18229	0	7D	5198912
D_contig35094_423	7D	5561427	0.08466	1.562	0.08333	0	7D	5200716
wsnp_Ex_c20695_29781602	7A	5319781	0.18378	3.646	0.17708	0	7A	5201301
BS00067630_51	6A	6525521	0.19126	4.688	0.21875	0	6A	5221776
BS00098161_51	3B	4702820	0.14205	8.333	0.18229	0	3B	5230380
Excalibur_rep_c101900_194	2D	5452474	0.14208	4.688	0.16667	0	2D	5234376
RAC875_c34512_685	2D	5452991	0.46561	1.562	0.46597	0.521	2D	5234893
Excalibur_c61319_300	2D	5453925	0.30337	7.292	0.29167	0	2D	5235827
Excalibur_c4705_660	2D	5540396	0.31818	8.333	0.33854	0	2D	5322307
Excalibur_c431_1130	6A	6630039	0.35294	2.604	0.36458	0	6A	5326475
Tdurum_contig12045_868	6A	6630315	0.37368	1.042	0.375	0	6A	5326751
RAC875_c4668_771	6A	6630339	0.39429	8.854	0.4375	0	6A	5326775
Tdurum_contig12045_613	6B	13788794	0.37037	1.562	0.375	0	6A	5327006
wsnp_Ex_c431_848217	6A	6630692	0.37566	1.562	0.375	0	6A	5327128
Tdurum_contig12045_327	6A	6630856	0.42038	18.229	0.43229	0	6A	5327292
RFL_Contig4030_493	2A	5816538	0.38378	3.646	0.38021	0	2D	5327928
Tdurum_contig10289_1265	7D	5690883	0.05319	2.083	0.0625	0	7D	5331633
BobWhite_c986_354	7D	5696229	0.18831	19.792	0.18229	0	7D	5336979
Tdurum_contig29878_239	6A	6667346	0.28495	3.125	0.28646	0	6A	5364480
BobWhite_c3351_329	7D	5736754	0.08511	2.083	0.08333	0	7D	5378498
Tdurum_contig42424_291	7A	5569794	0.48148	15.625	0.48958	0	7A	5423208
Kukri_c22349_754	1D	5869103	0.49735	1.562	0.49479	0	1D	5424620
wsnp_Ku_c3056_5734773	7D	5805858	0.21925	2.604	0.22917	0	7D	5448650
BS00094793_51	1A	6674026	0.31868	5.208	0.30729	0	1A	5500881
wsnp_Ex_c13244_20891347	7B	5839948	0.05729	0	0.05729	0	7B	5510584
TA002095-0637	2A	7449417	0.22105	1.042	0.22917	0	2A	5526406
BS00065628_51	7D	5938405	0.10983	9.896	0.15104	0	7D	5582775
RAC875_c33648_760	3B	5710199	0.39888	7.292	0.39583	0	3B	5583959
Jagger_c9935_144	3B	5711926	0.46857	8.854	0.4375	0	3B	5585686
Excalibur_c20277_483	3B	5712010	0.46667	14.062	0.42932	0.521	3B	5585770
Excalibur_c20277_436	3B	5712057	0.33939	14.062	0.40625	0	3B	5585817
Tdurum_contig12899_342	3B	5712127	0.42703	3.646	0.43229	0	3B	5585887
TA005244-1478	3B	5712267	0.22156	13.021	0.19792	0	3B	5586027
wsnp_Ex_c17294_25964947	7D	5990963	0.23121	9.896	0.24479	0	7D	5635649
D_contig59199_227	3D	5656146	0.38547	6.771	0.375	0	3D	5649089
BS00058860_51	3B	5800776	0.33333	4.688	0.34896	0	3B	5673670
Tdurum_contig11192_373	3B	5801553	0.34392	1.562	0.34031	0.521	3B	5674447
Tdurum_contig11192_139	3B	5801787	0.34104	9.896	0.3125	0	3B	5674681
Tdurum_contig11192_130	3B	5801796	0.0875	16.667	0.07292	0	3B	5674690
wsnp_Ku_c12698_20441325	3B	5801928	0.33511	2.083	0.34031	0.521	3B	5674822
tplb0032i02_1388	2A	7599249	0.18848	0.521	0.19271	0	2A	5677301
tplb0032i02_1435	2A	7599296	0.17277	0.521	0.17188	0	2A	5677348
wsnp_Ra_c21104_30458226	2A	7599446	0.17277	0.521	0.17188	0	2A	5677498
RAC875_c63018_441	2A	7704283	0.19565	4.167	0.19271	0	2A	5783491
RAC875_c63018_348	2A	7704376	0.38889	15.625	0.41146	0	2A	5783584
wsnp_Ku_c39334_47795461	6A	7169256	0.3617	2.083	0.36979	0	6A	5872944
Kukri_rep_c105406_308	6A	7169408	0.36264	5.208	0.375	0	6A	5873096
RAC875_c6916_860	6D	6821138	0.37368	1.042	0.375	0	6A	5873104
Ku_c39334_620	6A	7170040	0.3617	2.083	0.36979	0	6A	5873728
wsnp_Ex_c11658_18773086	7B	6249400	0.40107	2.604	0.40104	0	7B	5922944
BS00022393_51	2A	7849923	0.20787	7.292	0.19271	0	2A	5929807
CAP7_c9234_109	3B	6085550	0.36158	7.812	0.34737	1.042	3B	5952324
wsnp_Ex_c8360_14085858	3B	6086389	0.32759	9.375	0.32984	0.521	3B	5953163
RAC875_c68978_126	6D	6469927	0.23936	2.083	0.25	0	6D	5987031
BobWhite_c3073_1156	6D	6470238	0.32418	5.208	0.35938	0	6D	5987342
Tdurum_contig12045_246	6A	6630937	0.38251	4.688	0.375	0	6D	5988199
Ra_c78638_309	1B	6442044	0.36313	6.771	0.34375	0	1B	5990557
RAC875_c68530_59	5A	7156235	0.24571	8.854	0.23958	0	5A	5998461
BobWhite_c24745_419	4B	5804241	0.40462	9.896	0.41361	0.521	4B	6011678
BS00064394_51	7D	6365742	0.2337	4.167	0.23958	0	7D	6012742
Kukri_c8124_237	7D	6366640	0.22581	3.125	0.23958	0	7D	6013640
BS00010887_51	7D	6366985	0.22751	1.562	0.2356	0.521	7D	6013985
CAP8_c1408_167	4A	5975938	0.21591	8.333	0.19792	0	4A	6018544
Tdurum_contig29878_59	6A	6666825	0.4303	14.062	0.38542	0	6D	6019356
D_contig33959_220	1A	7211056	0.13228	1.562	0.13021	0	1A	6022769
BS00095028_51	4B	5785863	0.43646	5.729	0.42188	0	4B	6030056
CAP11_c6632_160	4D	3390039	0.40212	1.562	0.40314	0.521	4B	6141494
BobWhite_c1354_386	7D	6494979	0.15591	3.125	0.17708	0	7D	6141787
Kukri_c64744_698	4B	5666799	0.27368	1.042	0.27604	0	4B	6149759
IAAV7323	4B	5666794	0.23158	1.042	0.23958	0	4B	6149764
Excalibur_c14401_743	4B	5666745	0.35263	1.042	0.35602	0.521	4B	6149813
CAP7_c3664_305	4A	600160821	0.38202	7.292	0.39062	0	4B	6150178
Tdurum_contig85266_280	7B	6492955	0.27895	1.042	0.28646	0	7B	6153948
Excalibur_c94546_61	3B	6311484	0.37222	6.25	0.36126	0.521	3B	6178272
Excalibur_c50044_749	7B	6518349	0.29474	1.042	0.29167	0	7B	6179342
BobWhite_c42696_188	3B	239785559	0.25137	4.688	0.25	0	6B	6195022
Kukri_rep_c97239_133	2B	7474203	0.27895	1.042	0.28646	0	2B	6210207
RAC875_c65386_72	2A	5755057	0.17989	1.562	0.1875	0	2B	6210324
Excalibur_c39493_251	2B	7474039	0.25946	3.646	0.28125	0	2B	6210371
wsnp_Ex_c16090_24522660	6B	7117844	0.35556	6.25	0.375	0	6B	6220521
Ex_c16090_1439	6B	7118145	0.26203	2.604	0.27083	0	6B	6220822
BobWhite_c27287_232	3B	6374399	0.35676	3.646	0.35079	0.521	3B	6241188
BS00087757_51	3B	6383599	0.26404	7.292	0.29688	0	3B	6250389
RAC875_rep_c110962_423	2B	7425730	0.25	14.583	0.34375	0	2B	6258683
CAP7_c2441_492	2B	7423569	0.33155	2.604	0.33854	0	2B	6260844
Excalibur_c17250_104	2B	7421267	0.09574	2.083	0.09896	0	2B	6263146
Excalibur_c17250_592	2B	7420780	0.45665	9.896	0.44792	0	2B	6263633
RAC875_c35090_398	2B	7420744	0.10989	5.208	0.10417	0	2B	6263669
BS00022523_51	6D	6753778	0.35106	2.083	0.35417	0	6D	6275261
TA001188-1298	5A	7445575	0.44681	2.083	0.44503	0.521	5A	6289233
tplb0034e07_1869	2B	7373073	0.26036	11.979	0.25	0	2B	6311377
IACX9439	7A	6644735	0.31217	1.562	0.30729	0	7A	6314767
Kukri_c8390_1102	1A	7511296	0.18994	6.771	0.23958	0	1A	6323655
Kukri_c8390_1515	1A	7511823	0.45745	2.083	0.44792	0	1A	6324182
Excalibur_c10383_432	3B	12374783	0.42632	1.042	0.42408	0.521	3D	6334424
Excalibur_c62042_175	3D	6334462	0.11518	0.521	0.11458	0	3D	6335138
GENE-1442_78	2B	7346765	0.24737	1.042	0.25	0	2B	6337685
BS00110626_51	2B	7346470	0.28834	15.104	0.25521	0	2B	6337980
wsnp_Ra_c1501_2991585	2B	7346366	0.40107	2.604	0.41146	0	2B	6338084
Ra_c1501_1220	2B	7345893	0.44512	14.583	0.41667	0	2B	6338557
Ex_c525_1401	2B	7345719	0.26344	3.125	0.26042	0	2B	6338731
RFL_Contig5162_345	7B	6708944	0.14583	0	0.14583	0	7B	6369936
Excalibur_c3423_994	7B	6710960	0.22751	1.562	0.22917	0	7B	6371952
Excalibur_c3423_1170	7B	6711243	0.27374	6.771	0.29688	0	7B	6372235
IAAV6833	7B	6711612	0.13089	0.521	0.13542	0	7B	6372604
Tdurum_contig30677_55	7B	6732704	0.20652	4.167	0.22396	0	7B	6393696
Tdurum_contig30677_66	7B	6732715	0.28108	3.646	0.30208	0	7B	6393707
BobWhite_c9992_811	3B	6528593	0.21469	7.812	0.19792	0	3B	6395384
BobWhite_c9992_862	3B	6528644	0.15341	8.333	0.1623	0.521	3B	6395435
Excalibur_c19743_1714	3B	6528731	0.34946	3.125	0.34896	0	3B	6395522
RAC875_rep_c118986_60	3B	6529018	0.27586	9.375	0.33333	0	3B	6395809
Excalibur_c6714_246	5A	7578580	0.42308	5.208	0.4375	0	5A	6422238
Excalibur_c10406_1805	2B	8702160	0.23164	7.812	0.25521	0	2D	6430353
Kukri_c45368_300	7D	6837215	0.18935	11.979	0.18229	0	7D	6482219
Excalibur_rep_c68850_592	5A	7659482	0.48765	15.625	0.48438	0	5A	6490970
Excalibur_rep_c69170_425	7A	6824495	0.06316	1.042	0.06771	0	7A	6495676
Excalibur_rep_c69170_438	7A	6824508	0.17112	2.604	0.17708	0	7A	6495689
wsnp_Ex_c13953_21832185	7A	6824586	0.06316	1.042	0.06771	0	7A	6495767
GENE-4923_84	7A	6826128	0.22222	6.25	0.21354	0	7A	6497309
GENE-4923_506	7A	6826386	0.35955	7.292	0.33333	0	7A	6497567
RAC875_c55774_126	7A	6827779	0.45503	1.562	0.46354	0	7A	6498960
IAAV1942	6D	6975750	0.48387	3.125	0.48958	0	6D	6499218
Tdurum_contig42638_531	7A	6836119	0.23034	7.292	0.21354	0	7A	6507300
RAC875_c43902_315	4A	746307356	0.0733	0.521	0.07292	0	7A	6509296
RAC875_c4965_264	7A	6865231	0.07527	3.125	0.07292	0	7A	6537065
Ex_c1421_1813	7A	6867175	0.07447	2.083	0.07292	0	7A	6539009
wsnp_Ex_c17561_26284693	4B	7862201	0.17178	15.104	0.22917	0	4B	6540689
Excalibur_c1421_358	7A	6870834	0.37634	3.125	0.36458	0	7A	6542668
BS00102646_51	3B	6693980	0.38122	5.729	0.36842	1.042	3B	6558682
BS00009492_51	4D	6674670	0.33533	13.021	0.37173	0.521	4D	6585417
Tdurum_contig55193_347	6A	7885020	0.35979	1.562	0.35938	0	6A	6596868
TA003745-0632	5A	7790258	0.42932	0.521	0.42708	0	5A	6622276
BobWhite_c43135_430	6B	7526042	0.27108	13.542	0.24084	0.521	6B	6628733
Kukri_c7339_1716	2D	6841114	0.20779	19.792	0.32984	0.521	2D	6636025
D_contig18495_92	2D	6844623	0.31892	3.646	0.33333	0	2D	6639534
Kukri_c7339_113	2D	6847839	0.22751	1.562	0.23958	0	2D	6642750
BS00091518_51	5B	6705086	0.19895	0.521	0.19792	0	5B	6648497
Excalibur_c47452_183	5B	6710705	0.18421	1.042	0.18229	0	5B	6654116
tplb0026h09_1742	3D	6661326	0.35802	15.625	0.34896	0	3D	6663202
RAC875_rep_c71684_51	7A	6994789	0.17989	1.562	0.18229	0	7A	6666369
D_contig28406_150	3A	13857593	0.46012	15.104	0.43229	0	3D	6666790
Ku_c2972_1754	3A	10279544	0.47977	9.896	0.45312	0	3B	6677392
RAC875_c14696_369	3B	6815090	0.30688	1.562	0.30208	0	3B	6679801
BS00084368_51	3B	6815523	0.18717	2.604	0.19895	0.521	3B	6680234
wsnp_Ex_c2723_5047696	3B	6815578	0.3388	4.688	0.36316	1.042	3B	6680289
Excalibur_c2723_179	3B	6815879	0.40351	10.938	0.38021	0	3B	6680590
wsnp_Ex_rep_c67107_65584404	3B	6816083	0.29114	17.708	0.36126	0.521	3B	6680794
Kukri_c2972_110	3B	6816463	0.30978	4.167	0.30208	0	3B	6681174
BS00068092_51	3A	6766392	0.17222	6.25	0.16667	0	3A	6689700
RFL_Contig4979_4240	5A	7875567	0.49735	1.562	0.49738	0.521	5A	6707786
Excalibur_c45008_163	2B	6902099	0.25397	1.562	0.25	0	2B	6712681
Excalibur_c42248_211	2B	6902028	0.24339	1.562	0.25	0	2B	6712752
Excalibur_c45008_52	2B	6901988	0.25275	5.208	0.25	0	2B	6712792
IACX10969	2B	6901962	0.23243	3.646	0.25	0	2B	6712818
Excalibur_c20597_569	6A	8010371	0.44324	3.646	0.44271	0	6A	6725111
Excalibur_c20597_509	6A	8010431	0.37566	1.562	0.375	0	6A	6725171
Kukri_c3009_1374	6A	8017656	0.38172	3.125	0.375	0	6A	6732737
RFL_Contig5170_1904	6A	8017920	0.37968	2.604	0.38021	0	6A	6733001
Tdurum_contig63703_1305	6A	8018301	0.34568	15.625	0.375	0	6A	6733382
Tdurum_contig63703_1237	6A	8018369	0.36898	2.604	0.375	0	6A	6733450
wsnp_Ra_c3996_7334169	6A	8018922	0.33523	8.333	0.36458	0	6A	6734003
RAC875_c12259_1892	6B	15573140	0.36508	1.562	0.36458	0	6A	6740205
Kukri_rep_c101735_236	4A	646317804	0.42408	0.521	0.42188	0	3D	6750751
RFL_Contig1999_2772	3D	6751278	0.45181	13.542	0.45312	0	3D	6753154
wsnp_CAP8_c334_304253	7B	7090688	0.30851	2.083	0.30208	0	7B	6753261
BS00100045_51	3B	12807665	0.47059	2.604	0.46561	1.562	3B	6754198
Tdurum_contig14251_320	3B	12807665	0.46774	3.125	0.46561	1.562	3B	6754198
Tdurum_contig14251_431	3B	12807554	0.40373	16.146	0.46561	1.562	3B	6754309
BobWhite_c7454_363	3B	12807325	0.35135	3.646	0.34392	1.562	3B	6754538
BS00047528_51	3B	12807265	0.07979	2.083	0.07812	0	3B	6754598
Tdurum_contig49707_674	6B	7687255	0.35119	12.5	0.32812	0	6B	6789946
RFL_Contig5042_1233	5D	4324030	0.24339	1.562	0.25	0	5D	6821622
BobWhite_c17467_129	7A	7172742	0.16402	1.562	0.1623	0.521	7A	6845928
RAC875_c39204_91	5A	4961403	0.19892	3.125	0.20312	0	5B	6852691
BS00074495_51	6D	7330720	0.43195	11.979	0.45833	0	6D	6863001
BS00055293_51	6B	7779343	0.4881	12.5	0.49479	0	6B	6882044
IAAV6327	4A	6842233	0.19474	1.042	0.19792	0	4A	6888185
BS00062974_51	3A	6966818	0.34884	10.417	0.36979	0	3A	6892305
Kukri_rep_c103282_216	1D	7330572	0.44512	14.583	0.49479	0	1D	6899610
RAC875_rep_c108940_113	1D	7331442	0.48925	3.125	0.5	0	1D	6900480
RAC875_c16277_737	4A	6886821	0.22105	1.042	0.22396	0	4A	6932774
D_contig17056_55	6D	7431984	0.05202	9.896	0.05729	0	6D	6966722
BS00060041_51	4B	8345284	0.41379	9.375	0.46354	0	4B	7027468
Excalibur_c27288_413	3D	7026227	0.4375	0	0.4375	0	3D	7028392
BobWhite_c1656_186	4B	8355173	0.29834	5.729	0.3125	0	4B	7037357
Tdurum_contig46867_597	4B	8355596	0.47568	3.646	0.49479	0	4B	7037780
BobWhite_c1656_845	4B	8355987	0.13542	0	0.13542	0	4B	7038171
Excalibur_c49061_138	4B	8356180	0.18325	0.521	0.1875	0	4B	7038364
Excalibur_c28255_430	1D	7469610	0.19681	2.083	0.20312	0	1D	7039009
Excalibur_c28255_482	1D	7469662	0.21053	1.042	0.20833	0	1D	7039061
Tdurum_contig49608_1185	4B	8361676	0.3545	1.562	0.36126	0.521	4B	7043823
wsnp_Ku_c55746_59522526	3B	12499338	0.40719	13.021	0.38421	1.042	3B	7064140
Kukri_c55746_640	3B	12499014	0.42604	11.979	0.42932	0.521	3B	7064464
wsnp_Ex_rep_c103892_88739043	3D	6413401	0.46277	2.083	0.46073	0.521	3B	7064604
Excalibur_c88899_626	7D	7438557	0.12849	6.771	0.16146	0	7D	7072680
D_F1BEJMU02IKD3X_298	2D	7273585	0.08696	4.167	0.08333	0	2D	7073562
RFL_Contig5299_1529	3B	12486786	0.44693	6.771	0.46561	1.562	3B	7076692
RFL_Contig5299_1905	3B	12486410	0.2	16.667	0.30366	0.521	3B	7077068
BobWhite_c16182_53	6D	7570463	0.37433	2.604	0.375	0	6D	7106253
D_F5XZDLF02HX2DL_204	3D	7120322	0.05882	11.458	0.05208	0	3D	7122487
BS00011746_51	6B	8100261	0.13125	16.667	0.10938	0	6B	7151699
RAC875_c31381_883	6A	2947031	0.12994	7.812	0.125	0	6B	7152086
Ex_c864_653	4A	7110506	0.10417	0	0.10417	0	4A	7154906
Kukri_rep_c102231_265	1A	8529650	0.47312	3.125	0.46875	0	1A	7181831
D_GDRF1KQ02FMFSH_337	3D	7180309	0.48045	6.771	0.48691	0.521	3D	7182473
Excalibur_c2868_1808	1A	8532071	0.16667	3.125	0.16146	0	1A	7184252
Ku_c8810_903	1A	8532344	0.10556	6.25	0.09896	0	1A	7184525
CAP11_c2057_200	3B	12378739	0.05914	3.125	0.07292	0	3B	7186478
wsnp_Ex_c8386_14128029	3B	12377377	0.40556	6.25	0.41799	1.562	3B	7187840
Excalibur_c8386_1009	3B	12376843	0.07812	0	0.07812	0	3B	7188374
wsnp_Ex_c8386_14127329	3B	12376508	0.47059	2.604	0.46561	1.562	3B	7188709
Excalibur_c64596_82	3B	12375807	0.16022	5.729	0.19792	0	3B	7189410
Excalibur_c30902_51	6A	8483801	0.12429	7.812	0.11979	0	6A	7203367
Ku_c23419_358	3A	13218385	0.44324	3.646	0.44503	0.521	3D	7221366
Excalibur_rep_c109599_89	3B	13923871	0.49468	2.083	0.49738	0.521	3D	7222037
D_contig68177_584	3D	7225182	0.4875	16.667	0.46561	1.562	3D	7227346
CAP11_rep_c5797_312	3D	7227346	0.40223	6.771	0.43229	0	3D	7229510
JD_c12198_642	3D	7255674	0.19231	5.208	0.1875	0	3D	7257838
RAC875_c76948_970	3A	7330141	0.07368	1.042	0.07292	0	3A	7259832
Excalibur_c26857_1707	3D	7258405	0.43455	0.521	0.43455	0.521	3D	7260569
BS00022448_51	1A	8616751	0.05844	19.792	0.05729	0	1A	7275233
CAP8_c7793_186	3A	7348951	0.37714	8.854	0.375	0	3A	7279039
BS00056550_51	1A	8635640	0.32787	4.688	0.3125	0	1A	7294564
BobWhite_c12316_383	7D	7662225	0.18539	7.292	0.18229	0	7D	7297667
BobWhite_c8796_448	7A	8778200	0.26087	4.167	0.25521	0	7D	7301744
Tdurum_contig21233_82	4A	7279136	0.11236	7.292	0.10417	0	4A	7324975
Kukri_c8458_305	3A	15143756	0.3375	16.667	0.41361	0.521	3B	7372386
tplb0059m03_1516	3B	12197037	0.39881	12.5	0.46032	1.562	3B	7372771
Excalibur_c11505_155	3A	15144425	0.48315	7.292	0.49479	0	3B	7373055
RAC875_c30348_182	3B	12196543	0.34759	2.604	0.34392	1.562	3B	7373265
BS00011438_51	3B	12196290	0.34595	3.646	0.34392	1.562	3B	7373518
tplb0059m03_622	3B	12196143	0.35519	4.688	0.34392	1.562	3B	7373665
Excalibur_c11505_806	3B	12196102	0.34946	3.125	0.34392	1.562	3B	7373706
RFL_Contig5885_435	6D	8320831	0.36702	2.083	0.36979	0	6D	7397117
GENE-3111_152	5D	7544172	0.21472	15.104	0.18229	0	5D	7412388
Excalibur_c29417_499	2B	5872331	0.22283	4.167	0.25	0	2B	7429496
Excalibur_c29417_400	2B	5872232	0.26286	8.854	0.25	0	2B	7429595
BS00101972_51	2B	5871419	0.29091	14.062	0.25	0	2B	7430408
Excalibur_c2656_3198	2B	5870821	0.2356	0.521	0.23958	0	2B	7431006
BS00031118_51	2B	5866250	0.26857	8.854	0.25	0	2B	7435577
BS00058815_51	2B	5865146	0.25	4.167	0.25	0	2B	7436681
Kukri_c6306_1151	2B	5865110	0.24607	0.521	0.25	0	2B	7436717
BS00094057_51	3A	7505596	0.06989	3.125	0.06771	0	3A	7437103
Kukri_rep_c108293_98	2B	5858771	0.27879	14.062	0.25	0	2B	7443056
BS00083768_51	2B	5858723	0.24868	1.562	0.25	0	2B	7443104
BobWhite_c5654_231	7D	7810177	0.14211	1.042	0.14583	0	7D	7446640
BS00010128_51	1A	10439652	0.46875	0	0.46875	0	1D	7472926
GENE-3869_1488	3A	7543471	0.36667	6.25	0.40625	0	3A	7475739
BobWhite_rep_c64888_511	3A	7544217	0.46032	1.562	0.46354	0	3A	7476485
Excalibur_c9676_163	1D	7933855	0.42935	4.167	0.45312	0	1D	7510194
Excalibur_c12980_2621	2A	8709484	0.1988	13.542	0.18229	0	2A	7545198
Excalibur_c12980_2392	2B	13182664	0.10215	3.125	0.11979	0	2A	7545390
Kukri_c59485_60	7D	7924179	0.20468	10.938	0.20419	0.521	7D	7561317
wsnp_Ex_rep_c66939_65371026	7A	8069708	0.24845	16.146	0.33854	0	7A	7586802
RAC875_c56907_274	7D	6827136	0.45745	2.083	0.46875	0	7A	7586857
Ra_c69906_620	7A	8070641	0.0733	0.521	0.07292	0	7A	7587735
wsnp_Ex_rep_c66939_65370468	7A	8070734	0.16402	1.562	0.1623	0.521	7A	7587828
Excalibur_rep_c66939_849	7A	8070795	0.05729	0	0.05729	0	7A	7587889
wsnp_Ex_c4668_8353466	7A	8071662	0.18831	19.792	0.16667	0	7A	7588756
BobWhite_c609_1239	3D	7588854	0.29412	2.604	0.28646	0	3D	7593149
BS00082191_51	6A	8871719	0.15217	4.167	0.15104	0	6A	7595597
BS00004971_51	7A	8080144	0.07317	14.583	0.1623	0.521	7A	7597238
BobWhite_c3902_145	3A	15375456	0.07853	0.521	0.07812	0	3B	7604620
BobWhite_c3902_175	3B	11966778	0.46237	3.125	0.46597	0.521	3B	7604636
BS00101456_51	2B	5657436	0.23936	2.083	0.25	0	2B	7645556
wsnp_Ra_c1022_2067517	4A	594776653	0.18033	4.688	0.1875	0	4D	7646644
wsnp_CAP11_c710_458019	1A	8996605	0.17895	1.042	0.17708	0	1A	7657580
BobWhite_rep_c64787_359	2A	8905415	0.49727	4.688	0.47917	0	2A	7742607
BobWhite_c7145_355	2A	8905688	0.49143	8.854	0.47917	0	2A	7742880
D_GCE8AKX01AOOSX_177	4D	7867585	0.19048	1.562	0.1875	0	4D	7759598
Excalibur_c71944_223	4B	9206363	0.15254	7.812	0.17708	0	4B	7778632
Excalibur_c6132_917	4B	9236134	0.35789	1.042	0.35602	0.521	4B	7808593
Tdurum_contig42498_637	4A	597395083	0.31765	11.458	0.35417	0	4B	7816311
GENE-4933_489	4D	7937980	0.32065	4.167	0.3089	0.521	4D	7829993
BS00009426_51	4D	7940958	0.2973	3.646	0.3125	0	4D	7832971
Ku_c71122_384	4B	15856420	0.05208	0	0.05208	0	4D	7834498
RAC875_c27160_307	4D	7942485	0.05208	0	0.05208	0	4D	7834498
BobWhite_c32528_251	1D	8287702	0.46486	3.646	0.46597	0.521	1D	7868715
Kukri_c57942_177	1D	8288654	0.39444	6.25	0.41146	0	1D	7869667
wsnp_Ex_c1969_3705930	1D	8293790	0.36571	8.854	0.40625	0	1D	7874803
wsnp_Ku_c13229_21141117	1D	8293815	0.40526	1.042	0.41146	0	1D	7874828
wsnp_Ku_c13229_21141168	1D	8293866	0.32919	16.146	0.40625	0	1D	7874879
Excalibur_c17152_454	1D	8293912	0.42405	17.708	0.375	0	1D	7874925
RAC875_rep_c105796_519	1D	8295588	0.15287	18.229	0.1875	0	1D	7876601
BobWhite_rep_c49356_206	1D	8296538	0.40323	3.125	0.40625	0	1D	7877551
BobWhite_rep_c49356_237	1D	8296569	0.39247	3.125	0.41146	0	1D	7877582
RAC875_c1471_566	1D	8316106	0.19553	6.771	0.21875	0	1D	7897119
BS00085633_51	1D	8317962	0.1761	17.188	0.1875	0	1D	7898975
RAC875_c5718_785	2B	5396803	0.29487	18.75	0.23958	0	2B	7909523
BS00081981_51	3A	7980526	0.14973	2.604	0.15104	0	3A	7926877
RFL_Contig4140_1135	1D	8366752	0.36458	0	0.36458	0	1D	7947952
IAAV8085	1D	8367009	0.44	8.854	0.40838	0.521	1D	7948209
wsnp_BE637971D_Ta_2_3	1D	8367459	0.32716	15.625	0.41146	0	1D	7948659
Excalibur_c19658_82	3A	8003813	0.24599	2.604	0.24607	0.521	3A	7951473
BobWhite_c10903_399	2D	8163268	0.33514	3.646	0.32812	0	2D	7974261
BS00090490_51	1B	8526046	0.09043	2.083	0.08854	0	1B	7995154
TA006040-0724	1D	5275302	0.07447	2.083	0.07812	0	1B	7995245
Excalibur_c43567_850	1B	8526389	0.15183	0.521	0.15104	0	1B	7995497
BobWhite_c3714_659	6A	9276628	0.13978	3.125	0.14062	0	6A	8002448
BS00023008_51	5A	9677153	0.24737	1.042	0.25	0	5A	8059358
BS00101071_51	5A	9677197	0.42408	0.521	0.42188	0	5A	8059402
BS00098868_51	3B	13257012	0.44974	1.562	0.44974	1.562	3B	8133877
BS00028167_51	2B	5295464	0.2987	19.792	0.25131	0.521	2B	8176264
RAC875_c46691_110	7D	8533758	0.27072	5.729	0.25521	0	7D	8177485
BobWhite_c1715_887	1D	8594092	0.44211	1.042	0.44792	0	1D	8185597
tplb0050o09_968	3A	8265025	0.25	2.083	0.24607	0.521	3A	8211637
tplb0050o09_895	3A	8265098	0.18935	11.979	0.20942	0.521	3A	8211710
Kukri_c25201_305	5A	9856865	0.47458	7.812	0.47917	0	5A	8239070
Ku_c9559_737	5A	9861047	0.26455	1.562	0.27083	0	5A	8243252
BS00031073_51	5A	9861386	0.39535	10.417	0.39583	0	5A	8243591
wsnp_Ku_c9559_16000086	5A	9861386	0.41477	8.333	0.39267	0.521	5A	8243591
Kukri_c17126_1211	5A	9862413	0.25806	3.125	0.27083	0	5A	8244618
wsnp_Ex_c25707_34968426	5A	9863742	0.22105	1.042	0.21875	0	5A	8245947
Ra_c10762_1137	5A	9864108	0.27128	2.083	0.27083	0	5A	8246313
wsnp_Ex_c10961_17803258	2B	5060019	0.24339	1.562	0.25	0	2B	8250278
Excalibur_c16775_1734	7D	8608821	0.0618	7.292	0.05729	0	7D	8252548
Tdurum_contig8791_415	1B	8781190	0.07362	15.104	0.0625	0	1B	8255118
RAC875_c25517_1067	7A	8771597	0.48555	9.896	0.48438	0	7A	8255476
BobWhite_c8796_307	7A	8778451	0.17989	1.562	0.17708	0	7A	8262330
BS00019238_51	7A	8780033	0.20787	7.292	0.19372	0.521	7A	8263912
RAC875_c25628_180	2B	5037197	0.31098	14.583	0.26562	0	2B	8273094
Kukri_rep_c109732_72	2A	8324490	0.16757	3.646	0.18229	0	2D	8286271
Kukri_c14626_425	2D	8484332	0.32461	0.521	0.32812	0	2D	8295636
IACX8446	2B	12803912	0.29487	18.75	0.32812	0	2D	8297126
BS00080187_51	1A	9650898	0.43169	4.688	0.45312	0	1A	8312143
wsnp_Ex_c57982_59470152	1A	9668044	0.48108	3.646	0.47396	0	1A	8329289
Ex_c57982_980	1A	9668352	0.18519	1.562	0.1875	0	1A	8329597
Kukri_c19379_1091	3D	8328363	0.32571	8.854	0.3125	0	3D	8336830
wsnp_Ex_rep_c67625_66279491	3B	13462663	0.43316	2.604	0.44211	1.042	3B	8340567
Kukri_s117068_198	3A	13803294	0.45349	10.417	0.42408	0.521	3B	8343001
BobWhite_rep_c51336_730	7A	8890642	0.16316	1.042	0.16754	0.521	7A	8375970
BS00062956_51	6B	10229961	0.34946	3.125	0.36458	0	6B	8387579
IACX9205	6B	10230547	0.38462	5.208	0.36649	0.521	6B	8388165
wsnp_Ex_c1143_2195442	6B	10250529	0.11377	13.021	0.19271	0	6B	8408302
wsnp_Ku_c2119_4098330	6B	10252506	0.29444	6.25	0.27604	0	6B	8410279
BS00037474_51	7D	8816229	0.20339	7.812	0.19372	0.521	7D	8462758
BS00108090_51	1A	11350351	0.05914	3.125	0.05729	0	1D	8465338
BS00011652_51	7B	9196218	0.09524	1.562	0.09375	0	7B	8521139
BS00022154_51	3B	13649725	0.09424	0.521	0.09375	0	3B	8528868
wsnp_Ex_rep_c66766_65123941	3B	13649730	0.32402	6.771	0.34392	1.562	3B	8528873
TA006089-0703	5A	7871232	0.48913	4.167	0.5	0	5D	8530710
BS00065487_51	1B	9084299	0.39181	10.938	0.44792	0	1B	8559347
BS00022429_51	1B	9084650	0.4385	2.604	0.45312	0	1B	8559698
Excalibur_c30913_512	7D	8914306	0.09677	19.271	0.09375	0	7D	8560868
tplb0053a24_1247	3A	8670788	0.43646	5.729	0.41146	0	3A	8590635
RFL_Contig5360_1282	3A	8670878	0.43548	3.125	0.42932	0.521	3A	8590725
BS00066232_51	2B	4034951	0.31053	1.042	0.31771	0	2B	8592856
tplb0053a24_2232	7A	413746761	0.24468	2.083	0.24479	0	3A	8593525
BS00076278_51	1D	9022608	0.45213	2.083	0.46354	0	1D	8611577
Kukri_c17303_211	7D	8971309	0.05789	1.042	0.05729	0	7D	8618695
RAC875_c19183_306	1A	9969685	0.26582	17.708	0.25	0	1A	8632383
Excalibur_c16393_274	6D	9559193	0.19577	1.562	0.19792	0	6D	8638509
Ra_c6065_1145	6A	10642497	0.39362	2.083	0.38542	0	6D	8662110
BobWhite_c2949_1083	2D	8850450	0.49727	4.688	0.47917	0	2D	8667137
BS00005004_51	1B	9201368	0.06952	2.604	0.06771	0	1B	8676728
Kukri_rep_c89183_282	3A	8764605	0.06842	1.042	0.06771	0	3A	8685997
Kukri_rep_c89183_306	3A	8764629	0.25143	8.854	0.22917	0	3A	8686021
Kukri_c23717_188	3A	8765102	0.1694	4.688	0.16667	0	3A	8686494
RAC875_c7060_67	3A	8765275	0.18966	9.375	0.22917	0	3A	8686667
RAC875_c12071_413	3A	8765435	0.38587	4.167	0.41146	0	3A	8686827
CAP12_c1860_178	3A	8765483	0.16571	8.854	0.21354	0	3A	8686875
RAC875_c23140_869	7A	9206126	0.45455	2.604	0.46875	0	7A	8691416
RAC875_c23140_666	7A	9206449	0.45161	3.125	0.46875	0	7A	8691739
Ra_c11887_1826	7A	9208138	0.2033	5.208	0.19895	0.521	7A	8693428
wsnp_CAP11_c2142_1128735	6A	9963291	0.42945	15.104	0.5	0	6A	8694849
CAP12_rep_c8479_206	6A	9964327	0.09189	3.646	0.09375	0	6A	8695885
Kukri_c15388_1205	3D	8683239	0.43011	3.125	0.42188	0	3D	8697433
GENE-0019_1155	1D	9122470	0.11053	1.042	0.10938	0	1D	8712901
RAC875_c29471_461	2D	8899469	0.14607	7.292	0.13542	0	2D	8716784
wsnp_Ex_rep_c80588_75758453	2D	8899915	0.21788	6.771	0.21875	0	2D	8717230
D_GB5Y7FA01BMOJY_241	1D	9131064	0.10995	0.521	0.10938	0	1D	8721495
BS00042875_51	1D	9136999	0.08152	4.167	0.07812	0	1D	8727430
wsnp_Ex_c20581_29663216	1D	9136999	0.15294	11.458	0.14583	0	1D	8727430
BS00028088_51	6B	10687759	0.38624	1.562	0.38542	0	6B	8778768
RAC875_c1126_1769	7A	9292850	0.15789	10.938	0.15104	0	7A	8778941
RAC875_c1126_1569	7A	9293050	0.47273	14.062	0.46875	0	7A	8779141
RAC875_c58425_331	6B	10690248	0.37209	10.417	0.3822	0.521	6B	8781257
RAC875_rep_c77197_187	6B	10690449	0.13904	2.604	0.14062	0	6B	8781458
RAC875_rep_c77197_202	6B	10690464	0.49697	14.062	0.46597	0.521	6B	8781473
RAC875_c58425_110	6B	10690475	0.33537	14.583	0.36649	0.521	6B	8781484
CAP11_c527_306	3B	13899054	0.3949	18.229	0.44211	1.042	3B	8782293
Kukri_rep_c96809_352	3B	13923451	0.49718	7.812	0.49738	0.521	3B	8806691
Kukri_rep_c96809_457	3B	13923556	0.44086	3.125	0.44271	0	3B	8806796
RAC875_rep_c118229_56	3B	13923592	0.45745	2.083	0.46032	1.562	3B	8806832
BS00111294_51	3B	13928386	0.47514	5.729	0.46032	1.562	3B	8811626
Kukri_c49282_589	5D	144815640	0.12766	2.083	0.125	0		8839872
Fhb1_wMAS000008	3B	13965085	0.09091	25.625	0.06771	0	3B	8848524
Fhb1_wMAS000009	3B	13965085	0.05512	29.854	0.07812	0	3B	8848524
Excalibur_c9485_707	3A	8940332	0.08377	0.521	0.08333	0	3A	8864602
Excalibur_c9485_203	3A	8941167	0.26203	2.604	0.27604	0	3A	8865437
wsnp_Ex_rep_c67702_66370241	3D	3120427	0.05236	0.521	0.05208	0	3A	8865520
TA003589-0518	3A	8941423	0.06806	0.521	0.06771	0	3A	8865693
RAC875_c1666_126	3A	8941506	0.31548	12.5	0.29688	0	3A	8865776
IAAV8465	3A	8942166	0.3642	15.625	0.41146	0	3A	8866436
RFL_Contig1488_671	3A	8942463	0.08333	0	0.08333	0	3A	8866733
BS00022724_51	7A	9407964	0.18421	1.042	0.18325	0.521	7A	8895322
BobWhite_c34770_148	7A	9408122	0.18325	0.521	0.18325	0.521	7A	8895480
BS00080212_51	1B	9437724	0.08511	2.083	0.08854	0	1B	8915865
CAP7_c455_467	3A	12113760	0.38503	2.604	0.39583	0	3D	8971575
GENE-1851_76	3A	12112277	0.41011	7.292	0.40104	0	3D	8973237
IAAV1775	4B	10403427	0.43094	5.729	0.41146	0	4B	8983169
Tdurum_contig10149_284	6A	10325182	0.13115	4.688	0.14062	0	6A	8997444
BobWhite_rep_c52979_181	6B	10908328	0.27811	11.979	0.29167	0	6B	9002266
BS00009825_51	6B	10909413	0.30233	10.417	0.36458	0	6B	9003351
BobWhite_c12846_389	6B	10909808	0.14136	0.521	0.14062	0	6B	9003746
BS00003748_51	6B	10909829	0.36316	1.042	0.36649	0.521	6B	9003767
BS00003622_51	6B	10909871	0.3743	6.771	0.36126	0.521	6B	9003809
IACX5759	6B	10909952	0.33898	7.812	0.37696	0.521	6B	9003890
wsnp_Ex_c1988_3742022	6B	10941812	0.1117	2.083	0.11979	0	6B	9035741
RAC875_c44002_81	6B	10942203	0.2623	4.688	0.26562	0	6B	9036132
Excalibur_c1988_276	6B	10942263	0.14706	11.458	0.20833	0	6B	9036192
Excalibur_c26597_153	1B	182172701	0.07222	6.25	0.06771	0	3B	9070377
CAP12_c1619_54	1B	9609621	0.21176	11.458	0.19271	0	1B	9088686
BS00035526_51	1B	9610276	0.47953	10.938	0.47917	0	1B	9089341
D_contig30400_369	3A	12067930	0.12042	0.521	0.125	0	3D	9094372
BS00084380_51	7A	9622722	0.18325	0.521	0.18325	0.521	7A	9108615
Excalibur_c24593_1217	7A	9623893	0.45763	7.812	0.43229	0	7A	9109786
Excalibur_c5139_198	1A	10444996	0.43243	3.646	0.45312	0	1A	9110393
Excalibur_c82557_201	1A	10457551	0.43548	3.125	0.45312	0	1A	9122948
Tdurum_contig43938_291	3B	14282159	0.05882	2.604	0.05729	0	3B	9166499
wsnp_Ex_c24548_33795073	3B	14282296	0.05978	4.167	0.05729	0	3B	9166636
RAC875_rep_c107888_617	3A	13152104	0.48555	9.896	0.4375	0	3B	9171028
wsnp_Ex_c5231_9256482	7D	9643461	0.19459	3.646	0.18848	0.521	7D	9304289
Kukri_c17900_446	4A	592956901	0.47826	4.167	0.47644	0.521	4D	9305692
Ra_c9123_2016	7D	9645333	0.17391	16.146	0.19271	0	7D	9306161
Ku_c20948_1230	7D	9646774	0.07447	2.083	0.07292	0	7D	9307602
IAAV9104	7D	9648672	0.18717	2.604	0.18848	0.521	7D	9309500
wsnp_Ex_c410_808213	7D	9649055	0.07229	13.542	0.07292	0	7D	9309883
wsnp_Ex_c410_808465	7D	9649307	0.12883	15.104	0.18229	0	7D	9310135
wsnp_Ex_c410_808635	7D	9649477	0.12	8.854	0.17801	0.521	7D	9310305
BS00065372_51	2B	1553708	0.22581	3.125	0.21875	0	2B	9325217
Excalibur_c36501_188	5A	10932091	0.21277	2.083	0.21875	0	5A	9325617
wsnp_RFL_Contig2223_1603535	6A	10642847	0.08377	0.521	0.08854	0	6A	9327823
BobWhite_c22086_444	6A	10643060	0.39153	1.562	0.38542	0	6A	9328036
BS00096853_51	6D	9582140	0.07853	0.521	0.07812	0	6A	9328127
BobWhite_c25409_137	1B	700385450	0.2619	12.5	0.23438	0		9331172
BobWhite_c20934_397	1A	10725361	0.44693	6.771	0.42708	0	1A	9355646
wsnp_Ku_c13229_21142792	1A	10728303	0.13021	0	0.13021	0	1A	9358588
Excalibur_c22634_928	2B	14884158	0.0973	3.646	0.09375	0	2D	9401689
BS00091751_51	3A	9539167	0.35	6.25	0.33508	0.521	3A	9466577
IAAV2577	6D	10526096	0.44565	4.167	0.45833	0	6D	9470496
wsnp_Ex_c9779_16145653	6D	10527648	0.07471	9.375	0.10938	0	6D	9472048
Kukri_c6364_578	6D	10527703	0.4581	6.771	0.47396	0	6D	9472103
IAAV7479	1A	10919017	0.5	1.042	0.5	0	1A	9549302
BobWhite_rep_c52088_322	1A	10923832	0.39888	7.292	0.41146	0	1A	9554117
RAC875_c3692_2287	1B	10072380	0.19681	2.083	0.19792	0	1B	9556786
D_GDEEGVY02IF3IH_412	2D	9744724	0.125	4.167	0.11979	0	2D	9578949
Tdurum_contig68827_61	1A	10949354	0.49206	1.562	0.5	0	1A	9579639
BS00022943_51	1D	8332315	0.49474	1.042	0.5	0	1A	9579739
Kukri_c46939_83	1A	10949548	0.42169	13.542	0.5	0	1A	9579833
Kukri_c29655_239	1A	10949672	0.44444	6.25	0.45312	0	1A	9579957
Kukri_c29655_194	1A	10949717	0.14595	3.646	0.15625	0	1A	9580002
RFL_Contig5637_1008	1A	10949885	0.11579	1.042	0.11979	0	1A	9580170
Excalibur_c63663_93	1D	8338230	0.20442	5.729	0.20312	0	1A	9587126
Excalibur_c24288_548	6D	10643951	0.4712	0.521	0.47396	0	6D	9588351
wsnp_Ex_rep_c102143_87374435	5A	11654262	0.32558	10.417	0.39267	0.521	5A	9610758
wsnp_Ex_rep_c102143_87374122	5A	11654575	0.36757	3.646	0.375	0	5A	9611071
Ex_c17993_470	3A	9684879	0.4492	2.604	0.46073	0.521	3A	9613572
Ex_c95453_1499	5A	11658251	0.32955	8.333	0.33333	0	5A	9614747
RFL_Contig4140_1183	1A	11012389	0.20312	0	0.20312	0	1A	9642673
GENE-4832_103	1A	11013362	0.47568	3.646	0.48958	0	1A	9643646
BS00003696_51	5A	11696008	0.10995	0.521	0.10938	0	5A	9652496
IACX5832	5A	11696118	0.10995	0.521	0.10938	0	5A	9652606
wsnp_Ex_c57094_58953404	5A	11700876	0.11053	1.042	0.10938	0	5A	9657766
wsnp_BE399966A_Ta_2_3	5A	11702133	0.28108	3.646	0.27225	0.521	5A	9659023
Excalibur_c20943_154	7A	10197301	0.18325	0.521	0.18325	0.521	7A	9689121
BS00003917_51	1B	10223563	0.35912	5.729	0.35938	0	1B	9711316
Kukri_c92979_195	1B	10223918	0.3587	4.167	0.36458	0	1B	9711671
Kukri_c3701_330	2B	1957969	0.34759	2.604	0.34896	0	2B	9730866
Kukri_c3701_392	2B	1958031	0.48734	17.708	0.40104	0	2B	9730928
Excalibur_c60530_113	3A	10740801	0.38503	2.604	0.375	0	3D	9738833
Kukri_c3701_1980	2B	1966576	0.31383	2.083	0.32292	0	2B	9739714
tplb0054d13_2445	2B	1967806	0.07368	1.042	0.07812	0	2B	9740944
BobWhite_c41356_62	7B	10546647	0.32632	1.042	0.32292	0	7B	9753317
wsnp_Ku_c4299_7814936	7A	10259926	0.13021	0	0.13021	0	7A	9753521
IACX198	7B	10548521	0.30645	3.125	0.30729	0	7B	9755191
RAC875_c102411_201	1D	10161731	0.23037	0.521	0.23438	0	1D	9762312
RAC875_c97040_104	1D	10161744	0.48052	19.792	0.45312	0	1D	9762325
RFL_Contig5709_3005	3B	14910599	0.21693	1.562	0.21875	0	3B	9780211
RFL_Contig5709_3446	3B	14911040	0.22034	7.812	0.21875	0	3B	9780852
RFL_Contig5709_3312	3B	14910906	0.21622	3.646	0.21354	0	3B	9780885
BS00022353_51	5A	11890049	0.27922	19.792	0.28796	0.521	5A	9835026
BobWhite_c6468_104	5A	11890448	0.2234	2.083	0.21875	0	5A	9835425
BS00083562_51	1B	10351343	0.375	12.5	0.375	0	1B	9839723
BS00086096_51	5A	11895252	0.45882	11.458	0.49479	0	5A	9840229
wsnp_Ex_c28908_37989320	5D	13059756	0.49162	6.771	0.49738	0.521	5A	9840379
wsnp_Ex_c28908_37989067	5B	12894439	0.24176	5.208	0.26042	0	5A	9840632
RAC875_c16527_192	3A	9912198	0.30811	3.646	0.30208	0	3A	9844107
wsnp_Ku_c1254_2498515	5A	11900485	0.26316	1.042	0.26042	0	5A	9845462
Excalibur_c10366_109	3A	9913719	0.37363	5.208	0.40104	0	3A	9845628
Excalibur_c10366_58	3A	9913762	0.49721	6.771	0.47917	0	3A	9845671
RAC875_c36922_829	3A	9920826	0.0733	0.521	0.07292	0	3A	9852735
Excalibur_c98513_226	5A	11909413	0.49735	1.562	0.49738	0.521	5A	9854616
Excalibur_c55121_998	3A	9922886	0.24064	2.604	0.24479	0	3A	9854795
wsnp_Ex_c10014_16477392	3A	9924063	0.11321	17.188	0.1875	0	3A	9855972
Kukri_c8211_159	1D	10274155	0.19895	0.521	0.19792	0	1D	9875203
BobWhite_c11072_254	6D	10958272	0.43243	3.646	0.41667	0	6D	9907833
Kukri_c2963_272	4A	9872888	0.2328	1.562	0.22917	0	4A	9912816
TA001144-0714	6D	11023487	0.46707	13.021	0.47917	0	6D	9973066
BS00003595_51	1A	11349446	0.20787	7.292	0.20312	0	1A	9979743
RAC875_rep_c101110_474	1A	11350438	0.47895	1.042	0.47917	0	1A	9980735
RAC875_rep_c101110_563	1A	11350527	0.47368	1.042	0.47917	0	1A	9980824
Kukri_c24962_123	1A	11350829	0.46561	1.562	0.47396	0	1A	9981126
Tdurum_contig28703_293	5A	12092636	0.34375	0	0.34375	0	5A	10037847
Kukri_c67129_155	5B	10309127	0.31056	16.146	0.27083	0	5D	10042644
Kukri_rep_c102191_135	7D	10374001	0.18421	1.042	0.1875	0	7D	10047470
RAC875_c18640_821	1A	11424238	0.44022	4.167	0.45312	0	1A	10054613
Tdurum_contig43943_1165	1A	11437098	0.46821	9.896	0.48958	0	1A	10067496
Excalibur_c17152_852	1B	10577944	0.17033	5.208	0.20312	0	1B	10067775
Jagger_c3179_499	1B	10615143	0.45213	2.083	0.45026	0.521	1B	10068473
Tdurum_contig68637_256	1A	11438475	0.28421	1.042	0.28125	0	1A	10068873
Tdurum_contig43943_56	1D	9124117	0.36957	4.167	0.39583	0	1A	10068982
CAP11_c2581_302	1A	11439388	0.375	4.167	0.39583	0	1A	10069786
CAP8_c2448_355	1A	11439443	0.47644	0.521	0.47396	0	1A	10069841
Tdurum_contig14847_144	1A	11440026	0.10471	0.521	0.10938	0	1A	10070424
wsnp_Ku_rep_c103074_89904851	1B	10610238	0.21466	0.521	0.21354	0	1B	10075570
BS00070706_51	1B	10636725	0.39674	4.167	0.38542	0	1B	10102055
Tdurum_contig47083_278	1B	10638566	0.38542	0	0.38542	0	1B	10103896
Excalibur_c97691_225	1A	11496638	0.47647	11.458	0.47917	0	1A	10127734
BS00107529_51	5B	10215493	0.24737	1.042	0.24479	0	5B	10169365
wsnp_Ku_c13622_21660346	1D	10590800	0.18848	0.521	0.1875	0	1D	10180160
RAC875_c41169_68	7D	11332421	0.29101	1.562	0.29167	0	7A	10194123
wsnp_BE637971B_Ta_1_20	1B	10738652	0.12042	0.521	0.11979	0	1B	10204997
GENE-1756_564	4A	592168150	0.0582	1.562	0.0625	0	4D	10256117
BobWhite_c14032_133	1D	10666797	0.19672	4.688	0.1875	0	1D	10257231
RAC875_c11201_111	1D	10667147	0.20321	2.604	0.22396	0	1D	10257581
Kukri_c36190_189	4A	592166659	0.09375	0	0.09375	0	4D	10257609
Excalibur_rep_c102055_320	3A	10220902	0.37566	1.562	0.37368	1.042	3A	10259103
Kukri_rep_c68693_86	1D	10669243	0.07453	16.146	0.22396	0	1D	10259677
Kukri_c17177_1575	1D	10671998	0.21512	10.417	0.20312	0	1D	10262432
Kukri_c28164_739	1A	13316276	0.19048	1.562	0.1875	0	1D	10262957
BS00009810_51	5B	10310465	0.25532	2.083	0.25	0	5B	10265173
Excalibur_c98785_249	1A	13372541	0.44444	6.25	0.47396	0	1D	10266949
Kukri_rep_c69028_139	3A	10457950	0.05814	10.417	0.08333	0	3A	10300598
Kukri_rep_c69028_261	3A	10458072	0.39011	5.208	0.375	0	3A	10300720
wsnp_Ex_rep_c67635_66292689	3A	10458548	0.07937	1.562	0.08333	0	3A	10301196
Kukri_rep_c69663_846	3A	10460111	0.36066	4.688	0.36508	1.562	3A	10302759
wsnp_Ex_rep_c67635_66292308	3A	10460206	0.08421	1.042	0.08333	0	3A	10302854
wsnp_Ex_rep_c66331_64503065	3A	10460239	0.39344	4.688	0.38421	1.042	3A	10302887
Kukri_rep_c69028_1398	3A	10460419	0.09474	1.042	0.09375	0	3A	10303067
BS00011532_51	3A	10460456	0.35829	2.604	0.36508	1.562	3A	10303104
wsnp_Ex_rep_c67635_66291944	3A	10460569	0.09474	1.042	0.09375	0	3A	10303217
wsnp_Ex_rep_c66331_64502363	3A	10460822	0.37234	2.083	0.37368	1.042	3A	10303470
Excalibur_c63483_991	3A	10460903	0.14773	8.333	0.20942	0.521	3A	10303551
RAC875_c3956_275	3A	10461609	0.38333	6.25	0.36842	1.042	3A	10304257
TA003763-0481	3D	4472839	0.36898	2.604	0.36508	1.562	3A	10304868
wsnp_Ex_c12875_20407926	3A	10462348	0.34591	17.188	0.29843	0.521	3A	10304996
Excalibur_c12875_864	3A	10462556	0.08021	2.604	0.08333	0	3A	10305204
RAC875_c3956_1055	3A	10462730	0.38462	11.979	0.41146	0	3A	10305378
Excalibur_c12875_1643	3A	10465840	0.27439	14.583	0.34896	0	3A	10308488
Excalibur_c52842_317	2B	16019997	0.16754	0.521	0.16667	0	2D	10335364
Tdurum_contig93830_1688	3A	10508819	0.3871	3.125	0.37895	1.042	3A	10351592
wsnp_Ra_c8506_14401408	1D	10764642	0.4586	18.229	0.41361	0.521	1D	10355445
RAC875_c22210_191	7A	10864112	0.40741	15.625	0.35602	0.521	7A	10357708
BS00103677_51	1B	10891189	0.12299	2.604	0.11979	0	1B	10359581
BS00110896_51	1B	10892853	0.36782	9.375	0.38021	0	1B	10361245
BS00068429_51	1B	10898971	0.36757	3.646	0.38542	0	1B	10367363
Excalibur_c35312_109	7B	651144559	0.05882	2.604	0.05729	0	7A	10388907
Excalibur_c97505_90	6D	11465515	0.06486	3.646	0.0625	0	6D	10415268
CAP11_rep_c4893_84	4B	12158763	0.33735	13.542	0.42708	0	4B	10437558
wsnp_Ex_c607_1204908	5B	10483186	0.24868	1.562	0.25	0	5B	10438296
wsnp_Ex_c607_1204733	5B	10483361	0.26087	4.167	0.25	0	5B	10438471
wsnp_Ku_c10586_17464696	5B	10486863	0.21925	2.604	0.22396	0	5B	10441973
Tdurum_contig14130_315	5B	10489663	0.22632	1.042	0.22396	0	5B	10444773
Tdurum_contig14130_245	5B	10489733	0.22995	2.604	0.22396	0	5B	10444843
BS00022525_51	5B	10489873	0.23118	3.125	0.22396	0	5B	10444983
BS00083715_51	5B	10490043	0.22751	1.562	0.22396	0	5B	10445153
Excalibur_c19962_909	7D	10794218	0.2	6.25	0.20419	0.521	7D	10477594
TA001326-1839	6A	12070563	0.47644	0.521	0.47396	0	6A	10493384
GENE-0345_707	6A	12070907	0.45143	8.854	0.47396	0	6A	10493728
Excalibur_s102388_276	6A	12071047	0.14136	0.521	0.14062	0	6A	10493868
Excalibur_c9779_465	6A	12071068	0.47895	1.042	0.47396	0	6A	10493889
Excalibur_c30119_285	7D	10822848	0.22156	13.021	0.19792	0	7D	10506446
BS00063245_51	3D	10475953	0.3522	17.188	0.35417	0	3D	10518015
RFL_Contig4911_357	5D	10628588	0.23158	1.042	0.22917	0	5D	10522367
JD_c6222_563	5B	10569876	0.44624	3.125	0.45026	0.521	5B	10524986
wsnp_Ex_c831_1625061	5B	10569923	0.31217	1.562	0.30729	0	5B	10525033
RAC875_c22627_315	6A	12137419	0.44134	6.771	0.45833	0	6A	10560240
Kukri_rep_c101615_148	6A	12137595	0.4712	0.521	0.47396	0	6A	10560416
Excalibur_c8300_770	3D	9699796	0.45714	8.854	0.46875	0	3A	10589716
RAC875_rep_c106667_302	4B	12310177	0.43915	1.562	0.4375	0	4B	10590824
Excalibur_c25445_978	2A	12932246	0.18391	9.375	0.16667	0	2A	10599863
GENE-1273_395	2A	12932784	0.15789	1.042	0.16667	0	2A	10600401
Ex_c37709_771	4A	10589869	0.15707	0.521	0.15625	0	4A	10637718
Excalibur_c12032_1101	4A	10589979	0.24599	2.604	0.23958	0	4A	10637828
Excalibur_c5892_1129	1D	11082101	0.11458	0	0.11458	0	1D	10660879
IAAV6247	1D	11082859	0.125	4.167	0.13021	0	1D	10661637
Excalibur_c4876_832	1D	11083939	0.11702	2.083	0.11458	0	1D	10662717
D_GBF1XID01C7T2Q_63	1D	11089799	0.14205	8.333	0.13021	0	1D	10668578
CAP7_c1576_371	3D	8820293	0.12565	0.521	0.13021	0	3B	10708036
Tdurum_contig80344_144	3B	15826696	0.12565	0.521	0.13021	0	3B	10708136
RAC875_c76367_523	3B	15828451	0.4153	4.688	0.41885	0.521	3B	10709748
RAC875_c36363_222	7D	11028156	0.13542	0	0.13542	0	7D	10713875
D_F5XZDLF02H192C_184	7D	11029871	0.19892	3.125	0.19895	0.521	7D	10715590
wsnp_Ra_c1020_2062200	1D	11139345	0.11458	0	0.11458	0	1D	10719634
tplb0061f07_1411	1A	13808403	0.11458	0	0.11458	0	1D	10719784
D_contig78519_72	7D	11039211	0.2246	2.604	0.2199	0.521	7D	10724930
BS00099465_51	2A	530281	0.36842	1.042	0.36458	0	2B	10781756
Kukri_c52263_281	2B	404472	0.41304	4.167	0.39583	0	2B	10784075
BS00099469_51	2B	404451	0.42938	7.812	0.39583	0	2B	10784096
Kukri_c63460_739	2B	389629	0.32632	1.042	0.32812	0	2B	10798918
RAC875_c25710_297	2B	388013	0.43386	1.562	0.42708	0	2B	10800534
Excalibur_c6816_373	3A	10975157	0.28814	7.812	0.29167	0	3A	10824093
Ra_c349_1237	3A	10980697	0.25161	19.271	0.39062	0	3A	10829614
RFL_Contig1323_544	7D	11148006	0.19126	4.688	0.20942	0.521	7D	10835143
Tdurum_contig41906_1479	1B	11369311	0.16774	19.271	0.1875	0	1B	10840251
Kukri_c23473_534	1D	11264778	0.12	8.854	0.11458	0	1D	10845656
BS00109084_51	3A	11035646	0.18378	3.646	0.17708	0	3A	10884795
RAC875_c346_1226	7A	11425466	0.09626	2.604	0.10938	0	7A	10901977
Excalibur_c2827_580	7A	11426077	0.14458	13.542	0.1875	0	7A	10902588
Kukri_c24795_552	6D	11951465	0.07027	3.646	0.07292	0	6D	10906800
RAC875_c19250_188	6D	11952116	0.05	6.25	0.04688	0	6D	10907451
Tdurum_contig13245_443	7A	11432108	0.3027	3.646	0.32812	0	7A	10908619
Excalibur_c64989_556	6D	11957074	0.38542	0	0.38542	0	6D	10912409
RAC875_c2145_92	6A	12494895	0.47619	1.562	0.47396	0	6A	10919202
Ra_c2145_212	6D	10845082	0.47458	7.812	0.44792	0	6A	10919322
RAC875_c30782_188	3A	11102720	0.16667	15.625	0.1466	0.521	3A	10952298
Tdurum_contig79629_538	3B	16073667	0.43017	6.771	0.40104	0	3B	10956718
Kukri_c36272_216	1A	12371308	0.23529	2.604	0.23438	0	1A	10981534
BobWhite_c10673_330	2A	13322357	0.31609	9.375	0.375	0	2A	10993078
Excalibur_c32668_467	2A	13322437	0.44068	7.812	0.41146	0	2A	10993158
BobWhite_c10673_138	2A	13322549	0.37368	1.042	0.38021	0	2A	10993270
RAC875_c39634_370	2A	13322602	0.44509	9.896	0.41146	0	2A	10993323
Tdurum_contig48835_437	2A	13323206	0.32051	18.75	0.375	0	2A	10993969
BobWhite_c4057_365	3A	11151397	0.18129	10.938	0.18325	0.521	3A	11000826
Kukri_c67586_362	7D	11333995	0.17978	7.292	0.17188	0	7D	11023315
BS00067550_51	5B	11095179	0.20122	14.583	0.27083	0	5B	11043240
D_contig57829_235	1D	11465516	0.18868	17.188	0.21354	0	1D	11050004
wsnp_Ex_c11992_19213872	5A	13103661	0.3262	2.604	0.32812	0	5A	11055152
wsnp_Ex_c11992_19213600	5A	13103933	0.32461	0.521	0.32812	0	5A	11055424
RFL_Contig3352_463	5B	13478300	0.30435	4.167	0.32292	0	5A	11068521
wsnp_Ex_c21087_30214456	7D	11386943	0.18848	0.521	0.18848	0.521	7D	11070934
RAC875_c4389_1412	3B	16203255	0.26455	1.562	0.26562	0	3B	11087217
RAC875_c4389_1344	3B	16203323	0.26842	1.042	0.26562	0	3B	11087285
wsnp_Ku_c5874_10384800	7A	11609329	0.19126	4.688	0.19895	0.521	7A	11088149
wsnp_Ku_c5874_10384659	7A	11609470	0.17895	1.042	0.17801	0.521	7A	11088290
TA003428-0332	2B	30285	0.35106	2.083	0.35938	0	2B	11088522
Tdurum_contig74815_1274	7A	11620900	0.25269	3.125	0.27083	0	7A	11099721
BobWhite_c24931_231	7A	11620996	0.18848	0.521	0.18848	0.521	7A	11099817
Tdurum_contig74815_1413	7A	11621039	0.25668	2.604	0.27083	0	7A	11099860
wsnp_Ra_c5008_8947135	7A	11621120	0.17391	4.167	0.16667	0	7A	11099941
wsnp_Ku_c792_1636348	7A	11621339	0.45745	2.083	0.45833	0	7A	11100160
RAC875_c22233_83	7A	11621489	0.28333	6.25	0.32812	0	7A	11100310
Ku_c792_3564	7A	11622097	0.18478	4.167	0.18848	0.521	7A	11100904
Tdurum_contig74972_652	7A	11623741	0.25946	3.646	0.27083	0	7A	11102548
Kukri_c38982_555	6A	12688989	0.46369	6.771	0.47396	0	6A	11114817
wsnp_Ku_c38982_47513233	6A	12689265	0.05085	7.812	0.06771	0	6A	11115093
Kukri_c89274_86	6A	11827476	0.41436	5.729	0.43229	0	6A	11157745
Kukri_c1779_163	6A	11945464	0.38542	0	0.38542	0	6A	11162247
wsnp_Ex_c6604_11441822	6A	11822824	0.38542	0	0.38542	0	6A	11162397
BS00022564_51	1B	11710040	0.07345	7.812	0.11979	0	1B	11182251
Ra_c19501_1510	2B	13081056	0.40506	17.708	0.375	0	2B	11185450
Kukri_c1175_873	2B	13184790	0.45745	2.083	0.46354	0	2B	11289184
Kukri_c1175_1577	2B	13186682	0.20745	2.083	0.20312	0	2B	11291076
RAC875_c2504_670	2B	13186934	0.4734	2.083	0.46354	0	2B	11291328
Tdurum_contig14650_689	6A	12735746	0.16848	4.167	0.16667	0	6A	11329941
wsnp_Ex_c13357_21054802	4B	13064622	0.37968	2.604	0.375	0	4B	11347367
IACX10917	3A	11531080	0.0929	4.688	0.08854	0	3A	11350778
RAC875_c27161_152	1D	11761927	0.35795	8.333	0.36458	0	1D	11359555
BobWhite_c7145_1011	2B	13285741	0.46875	0	0.46875	0	2B	11390169
BobWhite_c5668_115	2B	13286026	0.49727	4.688	0.47917	0	2B	11390454
BS00011904_51	3A	11594608	0.28977	8.333	0.28646	0	3A	11414350
Kukri_c19060_750	7D	11738480	0.15508	2.604	0.16146	0	7D	11431718
GENE-4759_699	7D	11740469	0.28655	10.938	0.27083	0	7D	11433707
CAP8_c6474_94	2D	11693411	0.05208	0	0.05208	0	2D	11460138
Kukri_c26488_139	5B	11577648	0.36842	1.042	0.36979	0	5B	11527313
RAC875_c14684_1128	3B	752410898	0.06771	0	0.06771	0	5B	11527878
BobWhite_c8713_420	5A	11272298	0.31414	0.521	0.3125	0	5D	11530729
Excalibur_c30648_924	6B	14028685	0.48101	17.708	0.44792	0	6B	11539157
Excalibur_c16569_535	1D	11946957	0.15591	3.125	0.15104	0	1D	11547107
RAC875_c609_362	2A	13871572	0.05291	1.562	0.05208	0	2A	11547531
BS00022938_51	6A	12959439	0.1117	2.083	0.10938	0	6A	11555117
RAC875_c6749_954	4D	11972296	0.43827	15.625	0.375	0	4D	11567351
RAC875_c57939_78	1A	12956830	0.35443	17.708	0.45312	0	1A	11571831
RAC875_c57939_175	1A	12956927	0.46988	13.542	0.46875	0	1A	11571928
IAAV3758	4D	11978874	0.37037	1.562	0.375	0	4D	11573929
RAC875_rep_c105224_352	6B	14074662	0.22283	4.167	0.24479	0	6B	11585134
RFL_Contig1622_1259	6A	12994031	0.3681	15.104	0.44792	0	6A	11589709
BS00089270_51	1D	12021173	0.2356	0.521	0.23438	0	1D	11621339
Excalibur_c16851_142	1A	15306747	0.22917	0	0.22917	0	1D	11623117
RFL_Contig1338_2062	1D	12023060	0.25287	9.375	0.22917	0	1D	11623226
BS00089269_51	1D	12023093	0.21429	5.208	0.22917	0	1D	11623259
RFL_Contig1338_2646	1D	12023715	0.13253	13.542	0.22917	0	1D	11623881
BS00006820_51	1B	12156950	0.09239	4.167	0.11979	0	1B	11634623
BobWhite_c47168_598	7A	11608114	0.10582	1.562	0.10417	0	7D	11637467
BobWhite_c28295_256	1A	13048739	0.25946	3.646	0.25	0	1A	11663893
CAP7_c3299_316	1A	13050044	0.20745	2.083	0.20833	0	1A	11665198
CAP7_c3299_342	1A	13050070	0.13714	8.854	0.16146	0	1A	11665224
wsnp_Ku_c792_1635317	7A	11620193	0.19672	4.688	0.18848	0.521	7D	11670752
Tdurum_contig74815_685	7A	11620311	0.26842	1.042	0.27083	0	7D	11670870
Tdurum_contig74815_712	7A	11620338	0.31746	1.562	0.32812	0	7D	11670897
RAC875_c113582_346	1B	12217897	0.2234	2.083	0.22396	0	1B	11697033
RAC875_c101453_216	4A	11651673	0.38095	1.562	0.39062	0	4A	11706410
Kukri_c40204_141	2A	8335473	0.11765	2.604	0.11979	0		11732070
Excalibur_c9206_671	3D	11707585	0.40642	2.604	0.40625	0	3D	11749951
Excalibur_c9206_836	3B	21986281	0.35676	3.646	0.34555	0.521	3D	11750692
IAAV6442	3D	11708718	0.29143	8.854	0.32292	0	3D	11751084
GENE-1579_18	3D	11718998	0.06316	1.042	0.0625	0	3D	11761364
Kukri_c3249_806	2A	8300196	0.3526	9.896	0.32812	0		11767347
BS00092244_51	4D	455927682	0.44	8.854	0.46354	0	4A	11811395
BS00022177_51	4D	455927650	0.44654	17.188	0.48438	0	4A	11811427
Kukri_c5715_141	1A	13200913	0.20419	0.521	0.20312	0	1A	11819733
wsnp_BF293133A_Ta_2_2	3A	12012295	0.17895	1.042	0.17801	0.521	3A	11839117
Tdurum_contig49928_424	2D	12074710	0.15183	0.521	0.15104	0	2D	11843337
Kukri_c1312_666	1B	12378557	0.23333	6.25	0.22396	0	1B	11859086
IACX3811	1B	12378790	0.10811	3.646	0.10938	0	1B	11859319
RAC875_c63624_753	1B	12379010	0.1129	3.125	0.10938	0	1B	11859539
Ku_c1312_1194	1B	12379204	0.10582	1.562	0.10938	0	1B	11859733
RAC875_c63624_1002	1B	12379352	0.22513	0.521	0.22396	0	1B	11859881
RAC875_c63624_1040	1B	12379391	0.20312	0	0.20312	0	1B	11859920
CAP8_c2401_433	1D	12278652	0.0625	0	0.0625	0	1D	11879676
Excalibur_c46114_572	1B	12404833	0.33862	1.562	0.34896	0	1B	11885362
wsnp_Ex_c50340_54659660	1B	12409826	0.13904	2.604	0.15625	0	1B	11890358
Excalibur_c34148_481	2B	13914424	0.15294	11.458	0.13542	0	2B	11910541
wsnp_Ku_c28164_38103270	1A	13315999	0.25	0	0.25	0	1A	11939852
BS00022798_51	3A	12113208	0.41799	1.562	0.41885	0.521	3A	11941162
BobWhite_c5461_338	3A	12113606	0.43407	5.208	0.41885	0.521	3A	11941560
BobWhite_c22778_271	3A	12113862	0.05319	2.083	0.05208	0	3A	11941816
BS00093975_51	3A	12113982	0.4375	8.333	0.41885	0.521	3A	11941936
wsnp_Ku_c17177_26216230	1A	13371025	0.21277	2.083	0.20833	0	1A	11942481
BS00110709_51	1A	13392840	0.15385	5.208	0.16667	0	1A	11950603
Excalibur_c55363_265	1D	12381327	0.26042	0	0.26042	0	1D	11966952
Kukri_c52200_878	2A	14914572	0.13684	1.042	0.13542	0	2A	11999696
Excalibur_c30167_531	2A	14914762	0.48052	19.792	0.40838	0.521	2A	11999886
Kukri_rep_c69177_180	2A	14916115	0.35979	1.562	0.36458	0	2A	12001239
Kukri_rep_c103261_918	2A	14917409	0.36316	1.042	0.36458	0	2A	12002533
RAC875_c4814_564	5B	12124928	0.32335	13.021	0.30208	0	5B	12072510
BS00022126_51	2B	14080546	0.47826	4.167	0.47396	0	2B	12076663
RAC875_c25125_210	1A	13535095	0.24719	7.292	0.22917	0	1A	12093281
RAC875_c16352_326	1A	13539304	0.2623	4.688	0.25	0	1A	12097490
RAC875_c6600_716	6A	13501314	0.40351	10.938	0.40104	0	6A	12104254
Excalibur_c44754_312	1A	13583800	0.06557	4.688	0.07812	0	1A	12142488
Excalibur_c15692_532	1A	13583984	0.1625	16.667	0.13542	0	1A	12142672
RAC875_c48202_231	7A	12847959	0.29412	2.604	0.30729	0	7A	12177316
IAAV2596	7A	12848497	0.0582	1.562	0.05729	0	7A	12177854
wsnp_Ex_c17230_25883590	7D	12997990	0.17021	2.083	0.17708	0	7A	12180165
RFL_Contig1703_695	1A	13622604	0.34483	9.375	0.32292	0	1A	12182128
BS00065863_51	4B	567719755	0.11518	0.521	0.11458	0	4A	12208846
BobWhite_c7400_194	4B	13990711	0.14439	2.604	0.14583	0	4B	12247912
BS00048489_51	3A	12436683	0.41799	1.562	0.41885	0.521	3A	12253720
BS00048491_51	3A	12436716	0.41176	2.604	0.41667	0	3A	12253753
BobWhite_c25670_425	3D	12232926	0.05525	5.729	0.06771	0	3D	12276535
BobWhite_c1593_539	2A	15252575	0.20968	3.125	0.20312	0	2A	12280681
RAC875_c8459_1291	3B	10183970	0.0733	0.521	0.07292	0	3B	12289008
Ra_c8459_632	3B	10183190	0.09942	10.938	0.09896	0	3B	12289788
IACX11001	1A	13743562	0.3262	2.604	0.33333	0	1A	12303946
Kukri_c2121_1334	1A	13744872	0.375	8.333	0.34896	0	1A	12305256
Tdurum_contig17756_518	7A	12978550	0.29213	7.292	0.32812	0	7A	12309704
Excalibur_c25175_512	1A	13753120	0.39011	5.208	0.41667	0	1A	12313504
Excalibur_c55959_651	1A	15681388	0.14545	14.062	0.23438	0	1D	12313516
CAP7_c973_156	1D	12726293	0.41758	5.208	0.4375	0	1D	12315148
IAAV7856	1B	18609657	0.08383	13.021	0.07292	0	1D	12315178
D_contig14142_247	1D	12727057	0.28571	5.208	0.28125	0	1D	12315912
Kukri_c15388_692	3A	12503078	0.39674	4.167	0.40314	0.521	3A	12321601
Kukri_c15388_731	3A	12503101	0.48276	9.375	0.45312	0	3A	12321624
Kukri_c53085_574	3A	12504224	0.23034	7.292	0.28272	0.521	3A	12322747
wsnp_Ex_c2459_4591587	5B	12374455	0.27568	3.646	0.27083	0	5B	12324613
tplb0029e02_1186	5D	12683044	0.48851	9.375	0.49479	0	5B	12325290
BobWhite_c42719_90	5B	12379862	0.25862	9.375	0.26562	0	5B	12330020
Excalibur_c4748_360	2A	15308414	0.14674	4.167	0.15625	0	2A	12336524
RAC875_c2300_1021	2A	15311992	0.15263	1.042	0.15625	0	2A	12340102
BS00063476_51	5B	12398710	0.47312	3.125	0.4712	0.521	5B	12348868
wsnp_Ex_c7705_13139890	1A	13808249	0.26203	2.604	0.25521	0	1A	12367956
BS00103478_51	1A	13809775	0.45455	8.333	0.42188	0	1A	12369482
BobWhite_c4566_651	3A	12561798	0.13684	1.042	0.13542	0	3A	12380657
Kukri_c25727_139	6A	13781906	0.19251	2.604	0.19792	0	6A	12387925
RAC875_c106584_747	6A	13782553	0.13089	0.521	0.13021	0	6A	12388572
Kukri_rep_c103034_636	6A	13782847	0.3822	0.521	0.38542	0	6A	12388866
wsnp_Ku_c16572_25480808	6B	23845751	0.14211	1.042	0.14062	0	6A	12389884
Excalibur_c64989_250	6A	13786129	0.38624	1.562	0.39583	0	6A	12392149
Kukri_c49017_404	6D	11958132	0.49153	7.812	0.48438	0	6A	12393513
D_contig36176_338	7A	13069572	0.25641	18.75	0.29688	0	7A	12402043
BS00018120_51	4A	12333950	0.07368	1.042	0.07292	0	4A	12402447
Excalibur_c19475_619	7A	13074765	0.17647	2.604	0.19271	0	7A	12407232
Kukri_c67849_109	7A	79774287	0.46471	11.458	0.44792	0	7B	12407694
RFL_Contig3455_507	3B	17759974	0.38608	17.708	0.36458	0	3B	12408065
Excalibur_c9183_1397	7A	13078918	0.10059	11.979	0.10938	0	7A	12411398
Tdurum_contig69003_607	7A	13082132	0.30435	4.167	0.32812	0	7A	12414594
Kukri_c6118_821	7A	13083599	0.18333	6.25	0.18848	0.521	7A	12416061
RAC875_rep_c73038_1148	7A	13084077	0.17778	6.25	0.18848	0.521	7A	12416539
RAC875_rep_c73038_974	7A	13084952	0.18325	0.521	0.1875	0	7A	12417414
wsnp_Ex_rep_c105299_89769553	7A	13087760	0.17112	2.604	0.18848	0.521	7A	12420236
RAC875_rep_c72293_349	7A	13089386	0.28421	1.042	0.28646	0	7A	12421863
IACX11794	7D	12997676	0.24157	7.292	0.28646	0	7D	12470235
BS00004149_51	3A	12663039	0.45213	2.083	0.44271	0	3A	12482413
Tdurum_contig42479_1254	1A	13942293	0.27174	4.167	0.27083	0	1A	12504226
Tdurum_contig42479_1624	1A	13942663	0.11538	5.208	0.11458	0	1A	12504596
RAC875_c67106_97	1A	13943424	0.4104	9.896	0.44271	0	1A	12505357
wsnp_Ex_c1137_2182795	1A	13943544	0.2561	14.583	0.26042	0	1A	12505477
wsnp_Ra_c9755_16199734	4B	14271122	0.45283	17.188	0.38021	0	4B	12528425
wsnp_Ex_c18318_27140346	4B	14272042	0.38043	4.167	0.38021	0	4B	12529345
RAC875_c7752_2913	1D	12939108	0.44211	1.042	0.4375	0	1D	12533342
Ex_c6145_1877	1D	12940652	0.41489	2.083	0.42188	0	1D	12534886
RAC875_c7752_1223	1D	12941215	0.43979	0.521	0.44271	0	1D	12535449
Ex_c6145_833	1D	12941695	0.47458	7.812	0.4375	0	1D	12535929
RAC875_c7752_549	1D	12941972	0.44385	2.604	0.44271	0	1D	12536206
RAC875_c7752_145	1D	12942614	0.44211	1.042	0.4375	0	1D	12536848
Excalibur_rep_c102143_58	5B	12622932	0.45856	5.729	0.47396	0	5B	12573396
Excalibur_rep_c110121_63	5B	12623956	0.47674	10.417	0.4712	0.521	5B	12574420
wsnp_RFL_Contig1899_1055139	5B	12626604	0.37838	3.646	0.38021	0	5B	12577068
wsnp_Ku_rep_c103274_90057407	5B	12626867	0.4709	1.562	0.46842	1.042	5B	12577331
RFL_Contig1899_2863	5B	12627010	0.48193	13.542	0.4712	0.521	5B	12577474
BobWhite_c685_1231	1A	14027876	0.2356	0.521	0.23438	0	1A	12590251
BS00086364_51	2A	22486882	0.05236	0.521	0.05208	0		12592477
BS00086365_51	2A	22486921	0.09605	7.812	0.08854	0		12592516
Kukri_c24446_306	2A	22487323	0.09091	8.333	0.08854	0		12592918
BobWhite_c18433_76	5D	12676526	0.12422	16.146	0.125	0	5D	12593745
BS00010629_51	2A	22488305	0.05435	4.167	0.05208	0		12593900
Excalibur_c20491_1244	2A	22488359	0.08602	3.125	0.08854	0		12593954
RAC875_c28831_558	5B	12376472	0.24324	3.646	0.26562	0	5D	12598923
CAP12_rep_c4571_181	4B	14356014	0.13757	1.562	0.13542	0	4B	12613315
CAP12_rep_c4571_271	4B	14356104	0.10465	10.417	0.09375	0	4B	12613405
Kukri_rep_c97145_758	3A	12814921	0.35754	6.771	0.34896	0	3A	12635599
Excalibur_c25600_345	7A	50463546	0.47849	3.125	0.48168	0.521	3A	12636743
wsnp_CD453605B_Ta_2_1	6B	15562593	0.35119	12.5	0.36458	0	6B	12662406
wsnp_Ra_c14920_23225219	4B	567451249	0.43229	0	0.43229	0	4A	12680715
BS00012313_51	2D	12910489	0.08377	0.521	0.08854	0	2D	12689134
tplb0022c16_494	7D	13856332	0.10106	2.083	0.09896	0	7A	12757282
BS00074370_51	1A	14238601	0.12865	10.938	0.11458	0	1A	12769806
wsnp_Ku_c10362_17156084	3B	15063108	0.43503	7.812	0.47644	0.521	3A	12781570
wsnp_Ex_c2573_4788116	3A	12960963	0.43455	0.521	0.43455	0.521	3A	12783178
BobWhite_c12752_410	3A	12961625	0.05435	4.167	0.05208	0	3A	12783840
RAC875_c38003_164	2B	26575965	0.34921	1.562	0.34896	0	2D	12785756
CAP11_c570_73	3A	12989768	0.43158	1.042	0.43455	0.521	3A	12812130
BS00084661_51	3A	12989779	0.43455	0.521	0.43455	0.521	3A	12812141
BS00022279_51	3A	12991610	0.41848	4.167	0.43455	0.521	3A	12813972
BS00110822_51	3A	12991666	0.40659	5.208	0.42708	0	3A	12814028
BS00110921_51	3A	12991730	0.43455	0.521	0.43455	0.521	3A	12814092
BS00022347_51	3A	13016291	0.41304	4.167	0.43455	0.521	3A	12839041
wsnp_Ex_rep_c68504_67334656	5B	12896158	0.24479	0	0.24479	0	5B	12847328
Kukri_rep_c111561_377	6B	15927704	0.36216	3.646	0.36979	0	6B	12888052
Tdurum_contig93710_409	4B	14630188	0.1117	2.083	0.10938	0	4B	12888652
wsnp_Ex_c10347_16946522	4B	14630312	0.11111	1.562	0.10938	0	4B	12888776
wsnp_Ku_c7180_12403155	4B	14633714	0.10995	0.521	0.10938	0	4B	12892178
BS00037094_51	4B	14635135	0.11053	1.042	0.11458	0	4B	12893599
Kukri_c40856_176	4B	14639941	0.14024	14.583	0.13542	0	4B	12898405
GENE-4592_95	7A	13591871	0.30939	5.729	0.29167	0	7A	12909662
GENE-4592_541	7A	13592034	0.07647	11.458	0.06771	0	7A	12909825
Tdurum_contig49158_617	7A	13593049	0.25967	5.729	0.26562	0	7A	12910840
GENE-1086_1111	2A	16048683	0.48125	16.667	0.49215	0.521	2A	12961300
RAC875_c37392_401	2A	16048981	0.30909	14.062	0.32812	0	2A	12961598
Ku_c17560_162	3A	13157304	0.40884	5.729	0.43455	0.521	3A	12980723
Ku_c17560_146	3A	13157320	0.43915	1.562	0.43455	0.521	3A	12980739
BS00073062_51	3A	13174353	0.42781	2.604	0.43455	0.521	3A	12997772
Tdurum_contig69003_459	7A	13082925	0.10526	1.042	0.10938	0	7D	13014966
Excalibur_rep_c101263_892	2A	16112360	0.16842	1.042	0.17188	0	2A	13024977
BS00071422_51	3A	13205387	0.14365	5.729	0.1466	0.521	3A	13029150
BS00088987_51	3A	13212139	0.39645	11.979	0.43455	0.521	3A	13035902
TA002103-1262	3A	13212963	0.13018	11.979	0.11979	0	3A	13036726
RAC875_c787_431	3A	13214078	0.125	0	0.125	0	3A	13037841
RAC875_c787_395	3A	13214114	0.43386	1.562	0.43455	0.521	3A	13037877
wsnp_Ex_c23633_32868822	3A	13214407	0.42458	6.771	0.4555	0.521	3A	13038170
tplb0045c06_1675	4B	14794308	0.40588	11.458	0.38542	0	4B	13052772
CAP12_c1406_397	3A	13266915	0.06842	1.042	0.07292	0	3A	13090678
BobWhite_c8415_728	7A	13779987	0.24706	11.458	0.24479	0	7A	13101147
Excalibur_c833_1405	7A	13780893	0.25134	2.604	0.25521	0	7A	13102053
BS00088103_51	3A	13327336	0.47753	7.292	0.44271	0	3A	13151099
RAC875_c6538_123	2B	15165553	0.17935	4.167	0.17708	0	2B	13166158
BS00003944_51	5B	13224795	0.2199	0.521	0.21875	0	5B	13178829
BobWhite_c26680_62	5D	13795905	0.27807	2.604	0.27604	0	5B	13179590
Kukri_c41943_535	1A	14706588	0.32447	2.083	0.33854	0	1A	13231004
Kukri_c97223_93	2B	15237299	0.40964	13.542	0.375	0	2B	13238144
Kukri_c7393_285	1B	13737082	0.27128	2.083	0.27604	0	1B	13245812
BS00104401_51	3A	13581305	0.41053	1.042	0.41361	0.521	3A	13405069
BobWhite_c22126_118	3A	13586127	0.14917	5.729	0.16146	0	3A	13409891
Tdurum_contig47622_234	4B	15152827	0.06316	1.042	0.0625	0	4B	13411331
RFL_Contig2277_1527	4B	15164128	0.37423	15.104	0.35417	0	4B	13422601
RAC875_c78169_98	2D	13637228	0.10106	2.083	0.09896	0	2D	13425060
Tdurum_contig44048_276	5A	13103250	0.28421	1.042	0.28125	0	5B	13428117
D_GB5Y7FA02IDDA9_183	7D	14046302	0.11801	16.146	0.23958	0	7D	13487465
BobWhite_c23392_496	3A	13799522	0.41799	1.562	0.42408	0.521	3A	13496832
RAC875_c82493_67	3A	13799789	0.14211	1.042	0.14062	0	3A	13497099
BobWhite_c23392_63	3A	13799953	0.05063	17.708	0.04567	0	3A	13497263
Kukri_s117068_130	4A	646318885	0.42246	2.604	0.42188	0	3A	13500849
Excalibur_rep_c109112_430	3A	13805521	0.4	11.458	0.43455	0.521	3A	13502831
BobWhite_c17021_269	3A	13820232	0.4385	2.604	0.44444	1.562	3A	13517542
BobWhite_c17021_297	3B	13256960	0.42408	0.521	0.42408	0.521	3A	13517570
Excalibur_c25195_410	3A	13858031	0.28302	17.188	0.35789	1.042	3A	13555341
Excalibur_c25195_1047	3A	13859665	0.3631	12.5	0.42932	0.521	3A	13556975
wsnp_Ex_rep_c68175_66950387	6A	16012168	0.14444	6.25	0.13542	0	6D	13600863
Excalibur_rep_c68175_305	6D	14608594	0.08696	4.167	0.09375	0	6D	13601788
wsnp_Ex_c65899_64135487	7D	14162018	0.24599	2.604	0.26042	0	7D	13603455
wsnp_Ku_c25372_35336531	7D	14163244	0.07303	7.292	0.06771	0	7D	13604681
Tdurum_contig10595_633	4A	13578461	0.15789	1.042	0.15625	0	4A	13656340
Excalibur_c64890_61	1A	15203123	0.23757	5.729	0.22917	0	1A	13663825
wsnp_Ex_c7252_12453079	1A	15213269	0.41053	1.042	0.40625	0	1A	13673971
wsnp_Ex_c7252_12452995	1A	15213353	0.30851	2.083	0.30729	0	1A	13674055
Tdurum_contig53796_360	5B	13764668	0.32787	4.688	0.31771	0	5B	13724804
Tdurum_contig8695_379	5B	13765801	0.32447	2.083	0.31771	0	5B	13725937
Excalibur_c74858_243	5A	12598456	0.2199	0.521	0.21875	0	5D	13731092
Kukri_rep_c84820_251	3A	14042191	0.45161	3.125	0.45026	0.521	3A	13740044
BobWhite_c1265_247	1A	15302268	0.18079	7.812	0.21875	0	1A	13762970
BS00019919_51	3B	19097211	0.1	1.042	0.09896	0	3B	13764920
RFL_Contig4531_1195	3B	19097449	0.36898	2.604	0.37368	1.042	3B	13765158
RAC875_c23587_548	1A	15306988	0.22995	2.604	0.22917	0	1A	13767690
IAAV3809	1A	15307032	0.29834	5.729	0.28125	0	1A	13767734
BS00081682_51	1A	15307347	0.35227	8.333	0.40104	0	1A	13768049
RAC875_c23587_271	1A	15307362	0.39474	1.042	0.40104	0	1A	13768064
BS00002660_51	2D	14053765	0.12766	2.083	0.13542	0	2D	13838431
CAP7_c3847_204	1A	15401028	0.08025	15.625	0.07812	0	1A	13861730
RAC875_c103396_446	5D	13968677	0.31609	9.375	0.29319	0.521	5D	13893237
wsnp_Ex_c22683_31887799	3A	14203429	0.42932	0.521	0.42708	0	3A	13901401
Kukri_c3982_192	3A	14204700	0.42781	2.604	0.42408	0.521	3A	13902672
RFL_Contig772_2612	2D	14120901	0.44785	15.104	0.47917	0	2D	13906653
Excalibur_c74666_291	3A	14211304	0.42408	0.521	0.42408	0.521	3A	13909276
Tdurum_contig67399_676	4B	15685972	0.09189	3.646	0.10417	0	4B	13945650
wsnp_Ex_c16864_25440739	3B	19292783	0.29189	3.646	0.29167	0	3B	13962441
RAC875_c34649_380	3B	19296734	0.34591	17.188	0.29319	0.521	3B	13966405
Excalibur_c17599_988	3B	19296926	0.47059	2.604	0.46354	0	3B	13966597
BobWhite_c11935_137	3B	19297399	0.30857	8.854	0.29319	0.521	3B	13967070
Tdurum_contig31139_143	4B	15716273	0.11458	0	0.11458	0	4B	13976576
Tdurum_contig31139_79	4B	15716337	0.10995	0.521	0.11458	0	4B	13976640
RAC875_c10850_316	4B	15716921	0.23529	2.604	0.24479	0	4B	13977224
RFL_Contig2582_455	3A	14340044	0.28191	2.083	0.29319	0.521	3A	14039855
Kukri_c22513_1780	2B	16019292	0.16931	1.562	0.16667	0	2B	14047211
RAC875_c20989_1049	2B	16019745	0.17204	3.125	0.16667	0	2B	14047664
Excalibur_c25445_1061	2B	16020098	0.16667	0	0.16667	0	2B	14048017
wsnp_Ex_c25445_34710489	2B	16020501	0.08621	9.375	0.16667	0	2B	14048420
BobWhite_c45060_188	2B	16023411	0.18079	7.812	0.16667	0	2B	14051330
BS00068327_51	1B	14812603	0.37912	5.208	0.39062	0	1B	14051570
Tdurum_contig83113_134	1A	15595413	0.12088	5.208	0.11458	0	1A	14056115
BobWhite_c4253_568	7B	14921773	0.11538	5.208	0.10938	0	7B	14063797
Kukri_c53004_344	7B	14928691	0.2514	6.771	0.27083	0	7B	14070731
Kukri_c76307_182	1B	14860063	0.1	1.042	0.09896	0	1B	14099030
Kukri_c76307_259	1B	14860140	0.24074	15.625	0.23438	0	1B	14099107
Tdurum_contig76559_124	4B	15849001	0.36316	1.042	0.36458	0	4B	14110484
Excalibur_c7581_1266	4B	15849101	0.36316	1.042	0.36458	0	4B	14110584
Excalibur_c7581_791	4B	15851044	0.35829	2.604	0.36458	0	4B	14112527
BS00010115_51	4A	594356624	0.28022	5.208	0.28646	0	4B	14118235
BS00009480_51	4B	15856440	0.27684	7.812	0.3125	0	4B	14118254
Excalibur_rep_c79414_306	4B	15856450	0.31551	2.604	0.3125	0	4B	14118264
IACX7746	4A	594356717	0.31053	1.042	0.3125	0	4B	14118327
IACX8647	4A	594356717	0.25	8.333	0.27083	0	4B	14118327
GENE-4933_1176	4B	15860922	0.14198	15.625	0.21875	0	4B	14122736
GENE-4933_1095	4B	15860995	0.26554	7.812	0.30729	0	4B	14122809
GENE-4933_1085	4B	15861005	0.32584	7.292	0.30729	0	4B	14122819
RFL_Contig3591_1832	3D	14123493	0.23913	4.167	0.23438	0	3D	14135159
Excalibur_c41820_354	3B	19491216	0.48925	3.125	0.47917	0	3B	14163529
BobWhite_c14495_230	7A	14879891	0.47027	3.646	0.46875	0	7A	14189397
Excalibur_c9166_913	7A	14880600	0.08947	1.042	0.08854	0	7A	14190106
Kukri_c74599_455	7A	14880643	0.23204	5.729	0.25521	0	7A	14190149
Kukri_c74599_85	7A	14881012	0.21466	0.521	0.21354	0	7A	14190518
wsnp_Ra_c8297_14095831	7A	14881239	0.26705	8.333	0.30729	0	7A	14190745
BS00080746_51	5B	14228781	0.4734	2.083	0.47917	0	5B	14191702
D_GBF1XID01CJH0V_94	1B	20968883	0.37363	5.208	0.39062	0	1D	14200875
BS00110224_51	2D	14461190	0.05759	0.521	0.05729	0	2D	14254588
RAC875_c20707_256	2D	14466091	0.10215	3.125	0.11458	0	2D	14259489
BS00068863_51	7A	15034009	0.49721	6.771	0.47917	0	7A	14345731
Kukri_c21443_482	6A	15832931	0.33333	6.25	0.3125	0	6A	14354327
BS00077492_51	1A	15899637	0.10638	2.083	0.10417	0	1A	14360263
D_GA8KES402IFV6C_200	4D	14788363	0.40123	15.625	0.42188	0	4D	14398857
wsnp_RFL_Contig3118_3061389	2D	14608449	0.28191	2.083	0.28646	0	2D	14402024
Kukri_c19434_936	2D	14621128	0.07895	1.042	0.07812	0	2D	14414703
wsnp_Ex_c7908_13430703	2D	14627163	0.07879	14.062	0.07812	0	2D	14420738
Kukri_c77179_54	2B	16405441	0.17576	14.062	0.17708	0	2B	14433360
D_contig13336_220	3D	14435697	0.10692	17.188	0.08854	0	3D	14448866
wsnp_Ex_c37410_45162707	5B	14542892	0.49724	5.729	0.48958	0	5B	14509928
wsnp_Ex_c37410_45162932	5B	14543094	0.46512	10.417	0.48691	0.521	5B	14510130
Ex_c37410_1026	5B	14543691	0.47568	3.646	0.48438	0	5B	14510727
JD_c51907_59	5B	14543773	0.47849	3.125	0.48958	0	5B	14510809
Tdurum_contig75516_339	6D	8676264	0.08377	0.521	0.08854	0	6B	14522274
Ex_c21793_378	1A	16064972	0.07895	1.042	0.07812	0	1A	14528863
Ex_c21793_457	1A	16065051	0.07937	1.562	0.07812	0	1A	14528942
RFL_Contig4222_294	1A	16066844	0.41989	5.729	0.43229	0	1A	14530736
Kukri_c102346_668	2D	14826937	0.07812	0	0.07812	0	2D	14620706
RAC875_c2808_1394	6D	15730189	0.36875	16.667	0.34375	0	6D	14624569
Excalibur_rep_c113334_99	6D	15730859	0.5	14.583	0.45833	0	6D	14625239
BS00064042_51	5B	14749958	0.49412	11.458	0.46597	0.521	5B	14718157
GENE-4440_118	7A	15422463	0.05208	0	0.05208	0	7A	14734185
GENE-4440_719	7A	15422697	0.20526	1.042	0.21354	0	7A	14734419
Excalibur_c38040_227	7A	15422747	0.2381	12.5	0.26042	0	7A	14734469
wsnp_Ex_c58019_59494143	2D	14978180	0.0733	0.521	0.07812	0	2D	14772787
wsnp_CAP7_c888_455397	2D	14984182	0.07812	0	0.07812	0	2D	14778789
D_contig16084_234	2D	14984570	0.08108	3.646	0.07812	0	2D	14779177
RAC875_rep_c104943_272	7A	15503050	0.48538	10.938	0.48958	0	7A	14814772
BS00100185_51	5B	15384813	0.11628	10.417	0.125	0	5A	14844540
RAC875_c20134_535	3A	15144942	0.4973	3.646	0.49479	0	3A	14851061
IAAV1155	3B	12196146	0.39227	5.729	0.42408	0.521	3A	14851151
RAC875_c61273_277	4D	15246437	0.30357	12.5	0.35417	0	4D	14858434
BS00067698_51	2D	15065724	0.08333	0	0.08333	0	2D	14860448
tplb0021d05_204	6B	17896849	0.36628	10.417	0.40625	0	6B	14879421
Excalibur_c64119_385	6B	17897031	0.08901	0.521	0.08854	0	6B	14879603
Excalibur_c13975_335	7D	15416214	0.47568	3.646	0.46875	0	7D	14882138
BS00070426_51	2D	15104359	0.06952	2.604	0.09375	0	2D	14899502
BobWhite_c27352_145	3B	20511469	0.45304	5.729	0.4712	0.521	3B	14983269
Ku_c35453_498	3B	20511827	0.4918	4.688	0.4712	0.521	3B	14983627
JD_c6012_1567	3B	32355399	0.46277	2.083	0.46875	0	3B	14985273
Ku_c663_1896	3B	20514123	0.4	1.042	0.39791	0.521	3B	14985922
wsnp_Ra_c18153_27161629	3B	20514728	0.47368	1.042	0.4712	0.521	3B	14986527
Kukri_c38338_485	7A	15727130	0.27174	4.167	0.28646	0	7A	15038852
CAP8_rep_c5825_165	5B	15108349	0.20994	5.729	0.19792	0	5B	15054963
Jagger_c8402_128	5B	15130195	0.33918	10.938	0.30366	0.521	5B	15076808
RAC875_c18129_2491	7A	15774259	0.08065	3.125	0.08333	0	7A	15085981
Kukri_c36885_58	7D	16822435	0.28723	2.083	0.28646	0	7A	15087009
Excalibur_c92401_157	3A	15381805	0.42932	0.521	0.42932	0.521	3A	15089000
wsnp_Ex_c14219_22169892	7A	15778218	0.08228	17.708	0.17188	0	7A	15089940
CAP11_c6193_139	3A	15382747	0.43316	2.604	0.42932	0.521	3A	15089942
CAP11_c6193_232	3A	15382840	0.48925	3.125	0.49738	0.521	3A	15090035
wsnp_Ku_c38569_47177068	7A	15778453	0.10897	18.75	0.09375	0	7A	15090175
BS00071755_51	2D	15320042	0.10929	4.688	0.11979	0	2D	15115131
BS00076782_51	5B	15178630	0.26543	15.625	0.23438	0	5B	15125760
wsnp_CAP12_c1388_706924	6B	18148250	0.42857	1.562	0.42188	0	6B	15133792
GENE-0815_86	1B	15869890	0.14201	11.979	0.23958	0	1B	15142138
Tdurum_contig76266_134	1A	13310237	0.22872	2.083	0.23438	0	1B	15166145
Tdurum_contig76266_221	1B	15893985	0.25543	4.167	0.25	0	1B	15166232
Ex_c67198_1838	1B	15895954	0.1875	0	0.1875	0	1B	15168201
RAC875_rep_c69640_88	1B	15895965	0.22917	0	0.22917	0	1B	15168212
Tdurum_contig44219_318	1B	15897339	0.25263	1.042	0.25	0	1B	15169586
Excalibur_rep_c67198_530	1A	13316231	0.25131	0.521	0.25	0	1B	15171386
Excalibur_c81014_100	6B	18224197	0.46196	4.167	0.46875	0	6B	15209994
Tdurum_contig20965_1446	7D	15753170	0.22013	17.188	0.22917	0	7D	15223520
RAC875_c15960_97	2D	15595275	0.14368	9.375	0.13021	0	2D	15264823
BS00105846_51	1B	16010743	0.25806	3.125	0.25	0	1B	15284478
BS00003802_51	1D	16561941	0.08092	9.896	0.11458	0	1D	15307638
RAC875_c29907_293	5A	16788949	0.25926	1.562	0.25654	0.521	5B	15321601
BS00011095_51	5B	15384799	0.19372	0.521	0.19271	0	5B	15321661
BS00100183_51	5A	16789051	0.18617	2.083	0.19271	0	5B	15321706
Excalibur_c29975_333	5B	15385332	0.23757	5.729	0.25521	0	5B	15322194
BS00110642_51	7D	15848410	0.30319	2.083	0.30729	0	7D	15322797
BS00110124_51	7D	15848602	0.31053	1.042	0.30729	0	7D	15322989
BobWhite_c1890_712	1A	17322110	0.22346	6.771	0.20833	0	1A	15435225
Tdurum_contig61492_458	1B	21384085	0.10497	5.729	0.09896	0	1A	15438623
RAC875_c54245_88	1B	21383983	0.1016	2.604	0.09896	0	1A	15438723
Tdurum_contig61492_684	1A	17325734	0.10053	1.562	0.09896	0	1A	15438849
Kukri_c38845_821	1B	16171492	0.26087	4.167	0.25	0	1B	15449332
BS00064956_51	3B	21041098	0.0625	8.333	0.05729	0	3B	15521996
wsnp_CAP7_c44_26549	7B	17091249	0.2328	1.562	0.23438	0	7B	15592759
RAC875_c1125_578	2A	18671044	0.08065	3.125	0.07812	0	2A	15608865
IACX6178	2A	18674936	0.05759	0.521	0.05729	0	2A	15612757
BS00021973_51	7A	16452000	0.16981	17.188	0.22917	0	7A	15689389
Ex_c8465_206	2B	17732983	0.46203	17.708	0.46875	0	2B	15727079
RAC875_c22368_641	2D	16057222	0.25263	1.042	0.25	0	2D	15728889
RAC875_c5243_236	1A	13808918	0.23158	1.042	0.22917	0	1B	15746013
RAC875_c5243_206	1B	16467164	0.22632	1.042	0.22917	0	1B	15746015
RAC875_c23552_811	6A	17387387	0.17045	8.333	0.15625	0	6A	15748588
Excalibur_rep_c107577_250	6A	17405510	0.18848	0.521	0.18848	0.521	6A	15767403
Excalibur_rep_c110867_88	6A	10642859	0.34783	16.146	0.38542	0	6B	15781163
Kukri_c52953_562	6A	10642859	0.3758	18.229	0.38542	0	6B	15781163
RAC875_c18689_1950	6B	18791851	0.07937	1.562	0.08333	0	6B	15781175
RAC875_c18689_1870	6B	18791931	0.48421	1.042	0.48958	0	6B	15781255
Ex_c21841_1883	6A	10641366	0.3822	0.521	0.38542	0	6B	15782647
Kukri_rep_c102263_1262	6A	10641360	0.45989	2.604	0.46875	0	6B	15782653
RAC875_c43458_126	3A	16073526	0.11732	6.771	0.10938	0	3A	15788140
CAP12_c259_307	2A	18940851	0.0582	1.562	0.05729	0	2A	15875831
BS00095511_51	2A	18941362	0.05851	2.083	0.05729	0	2A	15876342
Excalibur_c22240_938	1B	16599361	0.26064	2.083	0.27083	0	1B	15878212
Excalibur_rep_c102627_598	1B	16600116	0.18343	11.979	0.17708	0	1B	15878967
BS00064706_51	2A	18946930	0.40881	17.188	0.40104	0	2A	15881910
GENE-4606_1208	7B	720760981	0.49738	0.521	0.5	0	7D	15906733
GENE-1887_85	3D	15935043	0.12568	4.688	0.14062	0	3D	15925343
BS00080836_51	2A	19013274	0.05348	2.604	0.05729	0	2A	15948254
Kukri_rep_c113558_107	2A	19013763	0.0914	3.125	0.10938	0	2A	15948743
Excalibur_rep_c108189_683	2A	19014533	0.07812	0	0.07812	0	2A	15949513
RAC875_rep_c105053_57	2A	19014998	0.06111	6.25	0.05729	0	2A	15949978
Excalibur_rep_c107932_225	2A	19015331	0.0582	1.562	0.05729	0	2A	15950311
Excalibur_rep_c110303_320	2A	19019241	0.06316	1.042	0.06771	0	2A	15954221
Ex_c1334_889	3B	21485737	0.22222	1.562	0.21875	0	3B	15971197
Kukri_c46276_63	5B	16029658	0.48936	2.083	0.48438	0	5B	16002467
RAC875_c15696_921	5A	17810442	0.48333	6.25	0.48168	0.521	5B	16002724
BS00065732_51	5B	16060799	0.4593	10.417	0.49738	0.521	5B	16033785
RAC875_rep_c114631_389	5B	16061605	0.49171	5.729	0.5	0	5B	16034591
Excalibur_rep_c104354_205	5B	16062116	0.49474	1.042	0.49738	0.521	5B	16035102
wsnp_BE497169B_Ta_2_2	3B	21585511	0.38587	4.167	0.4	1.042	3B	16038488
Kukri_c13107_100	4A	15936001	0.30319	2.083	0.30208	0	4A	16040273
D_contig12658_773	3D	16064029	0.23125	16.667	0.20312	0	3D	16055845
BS00011510_51	4B	17789918	0.35638	2.083	0.35938	0	4B	16056666
wsnp_Ex_c37502_45236634	4A	593489983	0.35979	1.562	0.35938	0	4B	16058390
tplb0060n12_565	4B	17822234	0.15508	2.604	0.16146	0	4B	16088982
Kukri_c41625_244	6D	17227627	0.21875	0	0.21875	0	6D	16118610
D_contig35269_394	3D	16137692	0.1828	3.125	0.19792	0	3D	16132653
IACX4152	7D	16720142	0.05	6.25	0.04688	0	7D	16154395
wsnp_Ex_c28429_37553452	4A	16086950	0.46597	0.521	0.46875	0	4A	16191571
BobWhite_c12067_311	4A	16101119	0.39744	18.75	0.32292	0	4A	16205740
Kukri_c14150_109	3A	16498624	0.2013	19.792	0.23438	0	3A	16215674
RFL_Contig5906_694	1B	16958525	0.3141	18.75	0.40625	0	1B	16217086
RFL_Contig5906_985	1B	16958910	0.23529	2.604	0.22917	0	1B	16217471
Excalibur_c78792_203	7A	15727766	0.16304	4.167	0.17708	0	7D	16223688
Excalibur_c72517_251	6B	19266180	0.12973	3.646	0.13021	0	6B	16242230
Kukri_c64737_150	3B	21808509	0.47647	11.458	0.47917	0	3B	16264281
wsnp_Ex_c9763_16125630	6A	18575935	0.05759	0.521	0.05729	0	6D	16290655
RAC875_c2253_1255	6A	18576840	0.05236	0.521	0.05729	0	6D	16291560
Kukri_c10377_112	6D	17402771	0.09424	0.521	0.09375	0	6D	16295426
Kukri_c10377_88	6D	17402790	0.0582	1.562	0.05729	0	6D	16295445
Kukri_c49280_230	3A	20776874	0.12571	8.854	0.11458	0	3D	16316002
RAC875_c8907_453	7D	16888726	0.28191	2.083	0.28125	0	7D	16322979
Ex_c3802_71	2D	16718788	0.41667	6.25	0.41146	0	2D	16342851
BS00066615_51	6A	18396905	0.19022	4.167	0.1875	0	6A	16386958
BS00003761_51	1A	18272279	0.14062	0	0.14062	0	1A	16390706
RFL_Contig772_1037	2A	19231383	0.05729	0	0.05729	0	2A	16400726
Excalibur_rep_c112367_329	2A	19229653	0.05914	3.125	0.05729	0	2A	16402456
Excalibur_rep_c112367_293	2A	19229625	0.4386	10.938	0.49215	0.521	2A	16402484
Kukri_c3067_398	5A	289478868	0.47541	4.688	0.47396	0	2A	16402858
wsnp_Ku_c5308_9450093	5B	16609395	0.48901	5.208	0.49215	0.521	5B	16422184
wsnp_Ex_c12927_20480163	5B	16610709	0.5	3.125	0.49738	0.521	5B	16423498
wsnp_BF200531A_Ta_2_1	1A	18315479	0.15819	7.812	0.14583	0	1A	16434575
Kukri_c67545_299	6B	19463462	0.32544	11.979	0.31771	0	6B	16440720
tplb0041e10_1230	3B	21985466	0.11828	3.125	0.125	0	3B	16442359
GENE-1856_1005	3B	21985720	0.0582	1.562	0.0625	0	3B	16442613
GENE-1856_1151	3B	21985854	0.05435	4.167	0.0625	0	3B	16442747
BS00088683_51	3B	21987314	0.05882	2.604	0.0625	0	3B	16444207
BS00088684_51	3B	21987419	0.06283	0.521	0.0625	0	3B	16444312
Excalibur_rep_c104498_168	3B	21987734	0.06349	1.562	0.0625	0	3B	16444627
Kukri_rep_c101341_425	3A	25989410	0.06627	13.542	0.0625	0	3B	16451329
wsnp_Ex_c8240_13914674	3A	25988599	0.4593	10.417	0.47396	0	3B	16452140
Kukri_rep_c107316_393	3B	21996420	0.06316	1.042	0.0625	0	3B	16453313
Excalibur_rep_c87664_233	3A	25987374	0.14737	1.042	0.14737	1.042	3B	16453368
RAC875_c8885_74	3B	21998320	0.05495	5.208	0.0625	0	3B	16455213
BS00018764_51	3B	21998573	0.06316	1.042	0.0625	0	3B	16455466
Excalibur_c12491_220	4A	16402874	0.32461	0.521	0.32292	0	4A	16510403
wsnp_RFL_Contig2177_1500201	3D	16521388	0.12069	9.375	0.10938	0	3D	16517943
Ex_c829_634	4A	582840459	0.20856	2.604	0.20833	0	4D	16543540
wsnp_RFL_Contig1951_1127302	2A	19663446	0.45513	18.75	0.45312	0	2A	16551313
Tdurum_contig44092_939	6A	18572691	0.0625	16.667	0.05729	0	6A	16563080
GENE-4050_57	6A	18575122	0.06358	9.896	0.05729	0	6A	16565330
RAC875_c2253_1756	6A	18576224	0.05917	11.979	0.05729	0	6A	16566432
Ra_c2253_1271	6A	18576824	0.05525	5.729	0.05729	0	6A	16567032
wsnp_Ku_c10377_17180909	6A	18580199	0.17112	2.604	0.18229	0	6A	16570407
Ku_c10377_335	6A	18580468	0.12169	1.562	0.12565	0.521	6A	16570676
Excalibur_c5442_1691	6A	18581003	0.38503	2.604	0.3822	0.521	6A	16571211
tplb0057e06_1607	6A	18581355	0.06044	5.208	0.05729	0	6A	16571563
RAC875_c1673_663	4D	17001569	0.08901	0.521	0.09375	0	4D	16586567
BS00022178_51	1D	17533473	0.34375	0	0.34375	0	1D	16612783
Excalibur_c8289_153	3B	29729851	0.10989	5.208	0.10417	0	3D	16619323
Excalibur_c19015_465	6D	17753104	0.1129	3.125	0.11458	0	6D	16649566
BS00004112_51	2A	19785476	0.05729	0	0.05729	0	2A	16672522
Kukri_c93866_431	1B	17521326	0.30488	14.583	0.29167	0	1B	16693444
TA004646-0293	7D	17404489	0.07065	4.167	0.06771	0	7D	16710035
Kukri_c19434_1170	2A	19834717	0.05882	2.604	0.05729	0	2A	16720811
D_GBUVHFX01EZR9Q_294	4D	17156069	0.22414	9.375	0.20312	0	4D	16741188
RAC875_c47161_100	2A	19855408	0.05988	13.021	0.05729	0	2A	16741513
CAP11_rep_c6465_98	1D	17709468	0.3369	2.604	0.34375	0	1D	16788625
BS00104199_51	1D	17709714	0.34031	0.521	0.34375	0	1D	16788871
BS00023049_51	1D	17709734	0.34807	5.729	0.34375	0	1D	16788891
Excalibur_c1787_1199	2B	18910198	0.32099	15.625	0.27083	0	2B	16827942
D_GB5Y7FA01CWYQV_234	1D	17755396	0.29775	7.292	0.29167	0	1D	16835371
Tdurum_contig54649_915	2B	18952563	0.24528	17.188	0.24479	0	2B	16871354
RAC875_rep_c88193_940	2A	19988818	0.16575	5.729	0.18421	1.042	2A	16875841
CAP11_c1594_271	6A	19665777	0.05729	0	0.05729	0	6D	16882591
Excalibur_c3524_318	2B	18979260	0.19394	14.062	0.27083	0	2B	16898053
BS00011466_51	2A	20011651	0.25683	4.688	0.25	0	2A	16899319
wsnp_Ku_c20949_30631810	7A	17063102	0.31746	1.562	0.31771	0	7D	16924472
Ku_c7594_1179	4A	16857023	0.4593	10.417	0.4375	0	4A	16967117
Ex_c7626_392	4A	16857442	0.45055	5.208	0.45833	0	4A	16967536
Ex_c7626_444	4A	16857494	0.4709	1.562	0.46875	0	4A	16967588
Ra_c74035_586	4A	16857858	0.47619	1.562	0.46875	0	4A	16967952
GENE-3277_145	5A	18917492	0.5	2.083	0.49738	0.521	5A	16981870
BS00043055_51	2B	19071639	0.45143	8.854	0.4555	0.521	2B	16990725
Kukri_c15954_114	2A	20111573	0.18848	0.521	0.18848	0.521	2A	17000289
Kukri_c15954_189	2A	20111648	0.18848	0.521	0.18848	0.521	2A	17000364
Kukri_c10525_100	2A	20111907	0.17442	10.417	0.19895	0.521	2A	17000623
RAC875_c829_1215	2A	20112182	0.37853	7.812	0.36458	0	2A	17000898
BobWhite_c11608_78	2A	20112700	0.0582	1.562	0.05729	0	2A	17001416
Kukri_rep_c106598_114	4B	18766678	0.43429	8.854	0.46354	0	4B	17043959
Kukri_c49506_396	4B	18766720	0.05978	4.167	0.0625	0	4B	17044001
RAC875_c55270_272	6D	18155828	0.29189	3.646	0.30729	0	6D	17056117
wsnp_Ex_c19993_29024127	3B	22615787	0.33511	2.083	0.34555	0.521	3B	17081831
RFL_Contig4881_137	4B	18814206	0.14365	5.729	0.15104	0	4B	17091701
Kukri_c47664_191	2D	17648355	0.24444	6.25	0.25521	0	2D	17184387
GENE-3207_610	5A	19168405	0.07303	7.292	0.06771	0	5A	17222182
RAC875_rep_c73081_330	6B	20241148	0.3089	0.521	0.3125	0	6B	17226448
wsnp_JD_c11061_11602784	6B	20241298	0.29032	3.125	0.30729	0	6B	17226598
wsnp_Ex_c31082_39921435	6B	20244572	0.30682	8.333	0.30729	0	6B	17229872
Ra_c50341_279	6D	18337955	0.47059	11.458	0.44271	0	6D	17233756
tplb0035d20_506	4B	18976286	0.11518	0.521	0.11458	0	4B	17254323
Kukri_c8594_203	4B	18977163	0.11702	2.083	0.11458	0	4B	17255200
wsnp_Ex_c6739_11646407	4B	18980107	0.47872	2.083	0.48438	0	4B	17258144
Ex_c883_2618	4A	17146793	0.10053	1.562	0.09896	0	4A	17259259
Ku_c22706_1527	4A	17148728	0.07979	2.083	0.08854	0	4A	17261194
wsnp_Ex_c4752_8482625	4A	17153366	0.10811	3.646	0.10417	0	4A	17265832
Excalibur_rep_c101288_130	2D	17775654	0.25	4.167	0.25	0	2D	17312725
RAC875_c48625_142	2D	17775848	0.07735	5.729	0.08854	0	2D	17312919
RAC875_c48625_182	2D	17775888	0.06215	7.812	0.08854	0	2D	17312959
Excalibur_c12177_285	2D	17776144	0.08466	1.562	0.08854	0	2D	17313215
BobWhite_c33300_159	7A	18217528	0.35465	10.417	0.32812	0	7A	17331569
BS00068944_51	7A	18222429	0.25455	14.062	0.22396	0	7A	17336470
D_contig15871_196	2A	21757968	0.28272	0.521	0.28125	0	2D	17337141
Excalibur_c16851_835	1B	18203933	0.2328	1.562	0.22917	0	1B	17383825
RAC875_c23587_447	1B	18206021	0.22632	1.042	0.22917	0	1B	17385913
tplb0030b11_1170	4A	17276827	0.26347	13.021	0.23438	0	4A	17389531
IAAV8700	2B	19465489	0.44048	12.5	0.49738	0.521	2B	17389857
IAAV2464	2B	19466196	0.08377	0.521	0.08333	0	2B	17390564
RAC875_rep_c69222_996	2B	19466200	0.4375	8.333	0.47644	0.521	2B	17390568
Excalibur_c31042_178	2B	19466346	0.08333	0	0.08333	0	2B	17390714
Tdurum_contig51145_476	2B	19466702	0.39024	14.583	0.47644	0.521	2B	17391070
Excalibur_c33214_659	7A	18279190	0.09756	14.583	0.09375	0	7A	17394103
BS00028092_51	2B	19470117	0.29747	17.708	0.27083	0	2B	17394485
Excalibur_c6604_616	6A	11816229	0.3822	0.521	0.38542	0	6B	17397281
RFL_Contig3110_2172	6B	20432469	0.08901	0.521	0.08854	0	6B	17417769
Tdurum_contig52364_941	6B	20433206	0.39444	6.25	0.42708	0	6B	17418506
Kukri_c6364_1243	6B	20433716	0.47872	2.083	0.47396	0	6B	17419016
BS00022406_51	7A	18306205	0.13376	18.229	0.13542	0	7A	17421119
BS00065556_51	2B	19530481	0.49474	1.042	0.49215	0.521	2B	17456965
BS00081098_51	7A	18352599	0.23837	10.417	0.26562	0	7A	17467521
RAC875_c12959_869	4B	19191563	0.5	1.042	0.49479	0	4B	17469493
IAAV2271	4B	19192248	0.48663	2.604	0.49479	0	4B	17470178
Ra_c29107_289	6D	18602416	0.12921	7.292	0.14583	0	6D	17503522
Excalibur_c50559_81	6B	20548479	0.38983	7.812	0.4375	0	6B	17533779
Excalibur_c50559_622	6B	20549020	0.19231	5.208	0.22396	0	6B	17534320
RAC875_c371_251	3A	18123184	0.44379	11.979	0.48168	0.521	3A	17538514
Excalibur_c25566_423	3B	23084052	0.3871	3.125	0.39267	0.521	3B	17559164
Excalibur_c25566_1000	3B	23087039	0.39572	2.604	0.39267	0.521	3B	17562151
Excalibur_c42928_135	2B	19637108	0.19251	2.604	0.1875	0	2B	17564595
RAC875_c62831_255	2B	19637270	0.35484	3.125	0.36126	0.521	2B	17564757
Kukri_c56081_307	2B	19642919	0.19444	6.25	0.19271	0	2B	17570842
BS00110996_51	2B	19644580	0.19136	15.625	0.1875	0	2B	17572503
BS00065543_51	5B	17835049	0.06349	1.562	0.0625	0	5B	17575010
BS00049514_51	2D	18066746	0.22652	5.729	0.25	0	2D	17605478
Kukri_c46169_294	1D	19011676	0.37566	1.562	0.375	0	1D	17630408
CAP8_c1881_215	6D	17983854	0.13158	1.042	0.13158	1.042	6A	17638445
tplb0060j17_1091	6B	33837466	0.05236	0.521	0.05729	0	6A	17638601
tplb0060j17_1061	6A	19665886	0.32418	5.208	0.3125	0	6A	17638631
tplb0060j17_879	6A	19666068	0.05236	0.521	0.05729	0	6A	17638813
tplb0060j17_450	6A	19666497	0.13158	1.042	0.13089	0.521	6A	17639242
CAP8_c1305_148	1B	27652789	0.37234	2.083	0.375	0	1D	17642605
IACX11417	2B	30731467	0.05851	2.083	0.05729	0	2A	17656712
BobWhite_c44404_312	7B	19159081	0.09091	2.604	0.08854	0	7B	17656855
BS00019273_51	6A	19690029	0.12791	10.417	0.13542	0	6A	17663037
RAC875_c41786_587	6A	19691244	0.05263	1.042	0.05729	0	6A	17664252
RAC875_c99174_63	6A	19691485	0.05789	1.042	0.05729	0	6A	17664493
Excalibur_c6326_77	6A	12494855	0.22778	6.25	0.21875	0	6B	17686579
RAC875_c62256_904	6B	20717995	0.40698	10.417	0.4375	0	6B	17703295
RAC875_c62256_577	6B	20718320	0.29508	4.688	0.28125	0	6B	17703620
Excalibur_c55093_143	6B	20718383	0.41304	4.167	0.4375	0	6B	17703683
BS00105833_51	1B	18549670	0.32335	13.021	0.28125	0	1B	17731170
Kukri_rep_c111543_206	4A	17616318	0.46277	2.083	0.46354	0	4A	17733815
wsnp_Ex_c53843_56941644	4A	17617162	0.38172	3.125	0.375	0	4A	17734659
wsnp_Ra_c16264_24873670	3B	23293218	0.33511	2.083	0.33508	0.521	3B	17770842
Tdurum_contig44328_68	2B	19847971	0.44444	6.25	0.41885	0.521	2B	17778939
Tdurum_contig44328_448	2B	19848351	0.42778	6.25	0.43979	0.521	2B	17779319
Excalibur_c30167_243	2A	14915518	0.43011	3.125	0.43979	0.521	2B	17781653
RAC875_rep_c112048_259	2B	19856240	0.37912	5.208	0.36126	0.521	2B	17787208
Kukri_c27673_289	2B	19856273	0.40351	10.938	0.36126	0.521	2B	17787241
Kukri_c11756_1706	1B	18606484	0.32515	15.104	0.28125	0	1B	17789621
RAC875_c15942_571	1B	18607535	0.28272	0.521	0.28125	0	1B	17790672
BobWhite_c4083_743	4A	17685635	0.45745	2.083	0.46875	0	4A	17804126
RAC875_c16897_367	2D	18272271	0.2956	17.188	0.25	0	2D	17814778
Tdurum_contig95782_945	1B	18632151	0.24479	0	0.24479	0	1B	17815728
Kukri_c8602_267	1B	18632215	0.23118	3.125	0.22396	0	1B	17815792
BobWhite_c30050_125	4B	19567469	0.1828	3.125	0.18229	0	4B	17850776
wsnp_JD_c4559_5692668	5B	18198321	0.08235	11.458	0.07292	0	5B	17941968
RAC875_c54701_277	5B	18200193	0.08901	0.521	0.08854	0	5B	17943840
Excalibur_c11605_156	5B	18201482	0.07368	1.042	0.07292	0	5B	17945129
Tdurum_contig97240_912	5B	18237672	0.07692	11.979	0.07292	0	5B	17981634
RAC875_c3190_727	7D	18762786	0.11446	13.542	0.09896	0	7D	18003203
RAC875_c25800_836	6D	19106070	0.17895	1.042	0.18325	0.521	6D	18008268
IAAV1711	6D	19112038	0.34409	3.125	0.35417	0	6D	18014724
BS00039218_51	3B	23544112	0.20513	18.75	0.20312	0	3B	18026091
RAC875_c2440_755	4A	17938343	0.40252	17.188	0.39062	0	4A	18058608
RAC875_c29598_336	1D	19456122	0.17708	0	0.17708	0	1D	18067713
IAAV5327	1D	19456875	0.36875	16.667	0.38021	0	1D	18068466
Kukri_c80544_61	4B	19817088	0.15263	1.042	0.15104	0	4B	18090914
Kukri_c12113_837	7D	18863936	0.18717	2.604	0.18848	0.521	7D	18105960
Kukri_c439_857	4A	18000202	0.47802	5.208	0.45833	0	4A	18120466
Tdurum_contig10939_413	2B	20186321	0.3625	16.667	0.30729	0	2B	18122009
BS00066336_51	3B	94215980	0.39286	12.5	0.41146	0	5B	18138827
BS00023188_51	3B	23673669	0.36095	11.979	0.40838	0.521	3B	18156407
Tdurum_contig68677_480	4B	19891122	0.14211	1.042	0.15104	0	4B	18162479
Tdurum_contig68677_611	4B	19891253	0.15104	0	0.15104	0	4B	18162610
RAC875_c87052_193	2B	20240542	0.33735	13.542	0.29843	0.521	2B	18176513
Excalibur_c5592_178	2A	21288325	0.18023	10.417	0.17708	0	2A	18178703
IAAV731	5A	14006951	0.32275	1.562	0.31771	0	5D	18192931
BobWhite_c25359_132	2B	20260720	0.30769	5.208	0.29688	0	2B	18196691
Excalibur_c1408_509	2D	18689189	0.0565	7.812	0.05208	0	2D	18234063
BS00086387_51	2B	33187133	0.26087	4.167	0.27604	0	2D	18234363
Excalibur_c41459_69	2B	20327065	0.16201	6.771	0.15104	0	2B	18263036
Excalibur_c41459_96	2B	20327065	0.16201	6.771	0.15104	0	2B	18263036
BS00063295_51	2A	21410747	0.15882	11.458	0.19474	1.042	2A	18301137
BS00064174_51	2A	21410881	0.1345	10.938	0.15183	0.521	2A	18301271
JD_c29948_428	7A	19281959	0.36747	13.542	0.375	0	7A	18318265
wsnp_Ra_c10712_17572884	2B	20450336	0.38122	5.729	0.3822	0.521	2B	18386307
BobWhite_c930_401	2B	20451038	0.39779	5.729	0.3822	0.521	2B	18387009
Tdurum_contig78972_316	1B	19235268	0.0791	7.812	0.07812	0	1B	18419687
Tdurum_contig30537_228	4B	20151043	0.14201	11.979	0.125	0	4B	18424311
Excalibur_c30534_86	4B	20151356	0.27374	6.771	0.26562	0	4B	18424624
RFL_Contig5_632	3B	36183125	0.17297	3.646	0.16667	0	3D	18433729
Excalibur_c16580_388	7D	19332774	0.24457	4.167	0.24479	0	7D	18438307
JD_c9656_680	6A	20498895	0.19101	7.292	0.17708	0	6A	18464095
IAAV1469	1A	20348750	0.06383	2.083	0.0625	0	1A	18486432
RAC875_c59712_105	1A	20349014	0.05729	0	0.05729	0	1A	18486696
IACX22	3B	24018113	0.13873	9.896	0.17188	0	3B	18503508
BS00090324_51	3B	24018640	0.13068	8.333	0.1875	0	3B	18504035
IACX6214	3B	24071814	0.25269	3.125	0.25789	1.042	3B	18559010
Kukri_c29358_277	2A	21746425	0.28108	3.646	0.27604	0	2A	18636715
Kukri_c2514_583	5A	20575587	0.45455	2.604	0.45026	0.521	5A	18637920
Tdurum_contig25432_1020	5A	20575661	0.44737	1.042	0.45026	0.521	5A	18637994
Excalibur_rep_c113914_309	2D	19273034	0.46667	6.25	0.46073	0.521	2D	18644881
Excalibur_c33589_373	1B	19475498	0.23243	3.646	0.22917	0	1B	18659917
BobWhite_c761_293	7D	19582968	0.17553	2.083	0.17708	0	7D	18692712
BS00022951_51	6A	20726115	0.1746	1.562	0.17895	1.042	6A	18704912
RAC875_c38136_199	6A	20727167	0.26316	1.042	0.26042	0	6A	18705964
wsnp_Ex_c16491_24996576	6A	20727298	0.25654	0.521	0.26042	0	6A	18706095
wsnp_BE404947A_Ta_2_1	6A	20727702	0.18325	0.521	0.18229	0	6A	18706499
BS00096301_51	6A	20727792	0.20958	13.021	0.18229	0	6A	18706589
Kukri_c24705_248	6B	36319073	0.17021	2.083	0.18229	0	6A	18706615
Excalibur_c8197_381	6A	20728087	0.17297	3.646	0.17895	1.042	6A	18706884
Tdurum_contig13287_811	6A	20733538	0.18182	2.604	0.18325	0.521	6A	18712735
Excalibur_c9835_91	6A	20733591	0.18325	0.521	0.18229	0	6A	18712788
Excalibur_c9835_136	6A	20733636	0.15676	3.646	0.18325	0.521	6A	18712833
Tdurum_contig13287_613	6A	20733736	0.15591	3.125	0.17708	0	6A	18712933
BS00011010_51	6A	20734042	0.26178	0.521	0.26042	0	6A	18713239
Tdurum_contig13287_203	6A	20734146	0.15591	3.125	0.17801	0.521	6A	18713343
Rht-D1_wMAS000002	4D	18781062	0.17391	28.125	0.14062	0	4D	18781062
RFL_Contig5025_1629	7D	19697020	0.22703	3.646	0.24479	0	7D	18808529
Tdurum_contig57914_1144	3B	24460363	0.4	1.042	0.40625	0	3B	18822179
Tdurum_contig57914_1156	3B	24460375	0.41176	2.604	0.40838	0.521	3B	18822191
CAP11_c5660_100	3B	24460463	0.41398	3.125	0.40838	0.521	3B	18822279
BobWhite_c44628_61	3A	19876082	0.24737	1.042	0.25	0	3A	18853573
BS00026471_51	3B	24512182	0.40107	2.604	0.40314	0.521	3B	18873474
Tdurum_contig93663_457	7A	19831111	0.3545	1.562	0.34896	0	7A	18876986
wsnp_Ex_rep_c66476_64726880	7A	19832028	0.30688	1.562	0.30729	0	7A	18877903
wsnp_Ex_c13170_20800656	7A	19834808	0.32787	4.688	0.34896	0	7A	18880683
RAC875_c16644_491	7A	19841982	0.34921	1.562	0.34896	0	7A	18887857
RAC875_c16644_1722	7A	19844162	0.34921	1.562	0.34896	0	7A	18890037
Kukri_rep_c109397_59	5A	20843008	0.39247	3.125	0.39267	0.521	5A	18905966
Kukri_rep_c105784_515	5A	20846619	0.14124	7.812	0.13021	0	5A	18909577
BS00039972_51	2A	22020359	0.06452	3.125	0.08854	0	2A	18912003
BS00010796_51	7D	19800301	0.10582	1.562	0.11458	0	7D	18912564
Tdurum_contig20262_440	2B	21467058	0.13836	17.188	0.11979	0	2B	18931800
Excalibur_c14396_1629	2B	21474528	0.3172	3.125	0.31937	0.521	2B	18939270
Kukri_c1831_56	7A	19959136	0.30939	5.729	0.31771	0	7A	19005011
RAC875_rep_c71232_324	7A	19960395	0.37017	5.729	0.35079	0.521	7A	19006270
RAC875_c47463_213	1D	20560230	0.18478	4.167	0.1875	0	1D	19018942
Excalibur_rep_c107678_98	1B	19844120	0.09375	0	0.09375	0	1B	19028822
Kukri_c3882_2021	2A	22209653	0.08377	0.521	0.08854	0	2A	19102847
wsnp_BF473056D_Ta_2_1	1D	20668300	0.09259	15.625	0.08854	0	1D	19127012
IACX9354	1D	20669697	0.36538	18.75	0.31771	0	1D	19128409
D_F5XZDLF01A85DT_301	1D	20670603	0.08947	1.042	0.09896	0	1D	19129315
wsnp_Ku_c7890_13514597	5A	21164584	0.45455	2.604	0.45026	0.521	5A	19231334
wsnp_Ex_c807_1585614	5A	21165839	0.47568	3.646	0.48438	0	5A	19232589
RAC875_c61186_150	5A	21166068	0.45604	5.208	0.44503	0.521	5A	19232818
wsnp_Ex_c807_1586158	5A	21166635	0.47849	3.125	0.48691	0.521	5A	19233385
Tdurum_contig42309_627	5A	21166733	0.49457	4.167	0.48691	0.521	5A	19233483
wsnp_Ex_c807_1586396	5A	21166919	0.47594	2.604	0.48438	0	5A	19233669
RFL_Contig3228_2154	3B	24992180	0.14286	1.562	0.15104	0	3B	19263629
RAC875_c2654_1817	1A	22927645	0.27273	14.062	0.33854	0	1D	19267149
Tdurum_contig63427_344	3B	24997733	0.13904	2.604	0.14737	1.042	3B	19269182
Kukri_c18268_79	5A	21203982	0.13089	0.521	0.13542	0	5A	19271084
BobWhite_c51109_415	5A	21204063	0.35326	4.167	0.36458	0	5A	19271165
BobWhite_rep_c50066_63	5B	21415788	0.4709	1.562	0.46597	0.521	5A	19272129
wsnp_BF201102A_Ta_2_1	5D	28989127	0.37234	2.083	0.37696	0.521	5A	19272274
GENE-3622_277	5B	21415996	0.46597	0.521	0.46597	0.521	5A	19272337
BS00111119_51	5A	21205689	0.13542	0	0.13542	0	5A	19272788
GENE-3024_71	4D	19707446	0.13441	3.125	0.14062	0	4D	19301395
BobWhite_rep_c63088_181	3A	19964391	0.11236	7.292	0.10417	0	3A	19307592
wsnp_Ex_c2117_3976893	1D	20854912	0.08046	9.375	0.08333	0	1D	19313625
BobWhite_c33103_476	7A	20271243	0.28249	7.812	0.27604	0	7A	19318802
Excalibur_c5646_1421	3B	25119428	0.14737	1.042	0.15104	0	3B	19390877
Ra_c10565_1109	3B	25121835	0.14362	2.083	0.14737	1.042	3B	19393284
Ra_c10565_1214	3B	25121940	0.14286	1.562	0.14737	1.042	3B	19393389
BobWhite_c11327_185	7D	20298534	0.47368	1.042	0.47917	0	7D	19405480
BobWhite_c20322_153	7D	20298794	0.46739	4.167	0.47917	0	7D	19405740
IAAV912	7A	20372544	0.12105	1.042	0.11979	0	7A	19420519
Tdurum_contig13048_89	7A	20372649	0.3046	9.375	0.28125	0	7A	19420624
BS00009543_51	7A	20372811	0.05405	3.646	0.05208	0	7A	19420786
Kukri_c60322_490	5B	19685668	0.47872	2.083	0.4712	0.521	5B	19438710
Tdurum_contig25432_1377	5A	20576018	0.44681	2.083	0.4555	0.521	5B	19439455
wsnp_Ku_c7060_12212702	3A	20122015	0.46842	1.042	0.46354	0	3A	19471818
Ra_c6118_350	3A	20136153	0.46073	0.521	0.46073	0.521	3A	19485956
wsnp_Ex_c1493_2860766	1B	678745248	0.24599	2.604	0.25521	0	7A	19522977
RFL_Contig5031_526	2A	22862821	0.46809	2.083	0.46597	0.521	2A	19649665
RAC875_s118883_99	2A	22863403	0.08511	2.083	0.08854	0	2A	19650247
Excalibur_c13413_1008	2A	22864268	0.48387	19.271	0.42932	0.521	2A	19651112
IACX8278	2A	22865304	0.47312	3.125	0.46597	0.521	2A	19652148
Kukri_c23338_624	4B	22449714	0.45026	0.521	0.44792	0	4B	19746019
Tdurum_contig31514_449	4B	22454577	0.19412	11.458	0.17708	0	4B	19751230
RFL_Contig2226_629	4A	592154119	0.47619	1.562	0.47396	0	4B	19755447
BS00090274_51	7A	20765169	0.34884	10.417	0.34375	0	7A	19816970
Tdurum_contig92906_272	7A	20765199	0.26923	5.208	0.29167	0	7A	19817000
Tdurum_contig13898_648	3B	25640201	0.15957	2.083	0.15625	0	3B	19869806
tplb0024b08_1668	1D	21517834	0.0977	9.375	0.09896	0	1D	19878354
RAC875_c5799_224	3B	40588132	0.08377	0.521	0.08333	0	3D	19885933
RAC875_c5799_170	3B	40588186	0.0625	16.667	0.0625	0	3D	19885987
GENE-0249_161	1D	21526855	0.29787	2.083	0.29688	0	1D	19887375
D_F1BEJMU01DOR77_203	1D	21533262	0.08602	3.125	0.09896	0	1D	19893782
BobWhite_c20306_111	7D	20298286	0.46914	15.625	0.47917	0	7A	19899392
Kukri_c4606_620	1D	21541343	0.11892	3.646	0.11458	0	1D	19901863
Kukri_c28866_183	7A	20881361	0.29609	6.771	0.29167	0	7A	19934822
BS00099611_51	7A	20914549	0.19251	2.604	0.19372	0.521	7A	19969637
BS00099610_51	7A	20914579	0.41304	4.167	0.42708	0	7A	19969667
wsnp_CAP7_c2282_1107112	5A	21908244	0.15169	7.292	0.14062	0	5A	19980285
GENE-1872_376	3A	20644822	0.10795	8.333	0.09896	0	3A	20001783
Excalibur_c8483_1308	3A	20662767	0.22162	3.646	0.22917	0	3A	20019946
IACX2831	3A	20663679	0.15625	0	0.15625	0	3A	20020858
wsnp_CAP11_rep_c4157_1965583	3A	20663839	0.14737	1.042	0.15104	0	3A	20021018
Kukri_c17099_871	3A	20679984	0.11538	5.208	0.11458	0	3A	20037632
D_contig13475_402	1D	21682699	0.1	6.25	0.09375	0	1D	20045042
RAC875_c7724_1312	3B	25816438	0.14894	2.083	0.15104	0	3B	20052028
wsnp_Ex_c1558_2976128	3B	25816579	0.30851	2.083	0.3089	0.521	3B	20052169
Kukri_c33670_261	1A	24226293	0.25806	3.125	0.27604	0	1D	20056215
Excalibur_c22642_90	1A	24225580	0.26738	2.604	0.27083	0	1D	20056928
GENE-4277_295	7D	20962552	0.16092	9.375	0.23958	0	7D	20064069
BobWhite_c1764_139	1A	21987593	0.0625	8.333	0.06771	0	1A	20092842
GENE-0211_446	1A	21988245	0.22222	6.25	0.23958	0	1A	20093494
BS00022738_51	1A	21989017	0.07186	13.021	0.0625	0	1A	20094266
BobWhite_c46501_92	1A	21989064	0.06011	4.688	0.05729	0	1A	20094313
Excalibur_c24303_1145	1B	28019423	0.35979	1.562	0.36458	0	1A	20094453
Tdurum_contig11756_264	1A	21989460	0.23256	10.417	0.23438	0	1A	20094709
RAC875_c21119_305	7A	21040808	0.28571	1.562	0.28646	0	7A	20097243
Ku_c31251_565	7A	21108253	0.18681	5.208	0.18229	0	7A	20155968
Excalibur_c24882_848	7A	21116311	0.28877	2.604	0.28646	0	7A	20164026
CAP11_c1661_59	7A	21116390	0.28191	2.083	0.28646	0	7A	20164105
Tdurum_contig54860_525	7A	21123426	0.26012	9.896	0.28646	0	7A	20171141
Tdurum_contig54860_1393	7A	21125229	0.46032	1.562	0.46354	0	7A	20172944
RFL_Contig4104_670	1B	20978683	0.29508	4.688	0.28125	0	1B	20174583
Tdurum_contig75819_3136	7A	21132830	0.41176	2.604	0.42708	0	7A	20180545
Excalibur_c74403_580	7A	21158381	0.08556	2.604	0.08333	0	7A	20206798
Excalibur_c5010_1336	4B	22976175	0.31053	1.042	0.31771	0	4B	20279475
Excalibur_c1310_414	7D	21208095	0.28415	4.688	0.30729	0	7D	20310955
Excalibur_c5212_813	7D	21224879	0.39429	8.854	0.36458	0	7D	20327920
TA001702-0608	3A	20969017	0.15508	2.604	0.15625	0	3A	20328674
[truncated: 21,344 more rows]
