# Supplementary material for: Identification of Disease Resistance Parents and Genome-Wide Association Mapping of Resistance in Spring Wheat
Source: Plants (Basel). 2022 Oct 28;11(21):2905. doi: 10.3390/plants11212905 (PMC9658635; doi:10.3390/plants11212905)
Supplement: Supplementary file 1 [file plants-11-02905-s001.zip › Table S4 IBS distance summary.xlsx]

## Sheet: Sheet1
Table S4. Pairwise genetic distance between pairs of 196 cultivars and lines based on 23342 imputed and polymorphic SNPs.
Taxa	Genotype name (cultivar or line)	Western Canada wheat class (as of Sept 28, 2021)*	Year of registration or development	5604HR CL	5605HR CL	5700PR	5701PR	5702PR	AAC Bailey	AAC Brandon	AAC Chiffon	AAC Connery	AAC Crossfield	AAC Elie	AAC Entice	AAC Foray	AAC Iceberg	AAC Innova	AAC Penhold	AAC Proclaim	AAC Redwater	AAC Ryley	AAC Tenacious	AAC Viewfield	AAC Whitefox	AC Abbey	AC Andrew	AC Barrie	AC Cadillac	AC Cora	AC Corinne	AC Crystal	AC Domain	AC Eatonia	AC Elsa	AC Foremost	AC Intrepid	AC Karma	AC Majestic	AC Meena	AC Michael	AC Minto	AC Nanda	AC Phil	AC Reed	AC Splendor	AC Taber	AC Vista	AC2000
GID-001	5604HR CL	CWRS	2011
GID-002	5605HR CL	CNHR	2013	0.225302
GID-003	5700PR	CPSR	2001	0.393482	0.402015
GID-004	5701PR	CPSR	2002	0.346628	0.378716	0.295583
GID-005	5702PR	CPSR	2008	0.378545	0.379873	0.351372	0.313898
GID-006	AAC Bailey	CWRS	2012	0.32765	0.310299	0.426244	0.374989	0.403564
GID-007	AAC Brandon	CWRS	2013	0.267543	0.302887	0.419768	0.361923	0.360595	0.344401
GID-008	AAC Chiffon	CWSWS	2013	0.401122	0.410248	0.388122	0.429526	0.377902	0.396924	0.420358
GID-009	AAC Connery	CWRS	2015	0.25332	0.263731	0.404331	0.335961	0.38707	0.315526	0.267843	0.427298
GID-010	AAC Crossfield	CPSR	2016	0.335318	0.365778	0.324828	0.0883386	0.325808	0.372676	0.348042	0.423785	0.333305
GID-011	AAC Elie	CWRS	2013	0.263645	0.298475	0.417067	0.364707	0.361323	0.342044	0.0158084	0.418944	0.270457	0.350398
GID-012	AAC Entice	CPSR	2016	0.338531	0.369848	0.327702	0.0932654	0.328935	0.375375	0.349713	0.425885	0.336004	0.0135807	0.352669
GID-013	AAC Foray	CPSR	2014	0.372376	0.350998	0.320626	0.195485	0.33519	0.362694	0.378245	0.401037	0.371048	0.229929	0.383515	0.232542
GID-014	AAC Iceberg	CWHWS	2013	0.240211	0.284037	0.422856	0.362094	0.38887	0.318696	0.231514	0.405278	0.276669	0.332791	0.228986	0.334376	0.380987
GID-015	AAC Innova	CWSP	2013	0.419401	0.430565	0.33521	0.404629	0.392434	0.436362	0.439711	0.227113	0.456329	0.415106	0.43984	0.415836	0.378221	0.422879
GID-016	AAC Penhold	CPSR	2014	0.39144	0.390027	0.223799	0.330049	0.364365	0.420915	0.400137	0.398852	0.405021	0.318482	0.396153	0.318267	0.35434	0.383429	0.345027
GID-017	AAC Proclaim	CWSP	2013	0.409007	0.412885	0.384722	0.425943	0.40961	0.401939	0.426934	0.262185	0.424865	0.428313	0.429476	0.427925	0.420168	0.415945	0.29286	0.406723
GID-018	AAC Redwater	CNHR	2012	0.227615	0.3076	0.438036	0.344615	0.368992	0.303187	0.303744	0.434239	0.293805	0.345557	0.303359	0.345686	0.382444	0.253106	0.440055	0.402793	0.436802
GID-019	AAC Ryley	CPSR	2013	0.362908	0.355839	0.340609	0.352326	0.353997	0.380302	0.357039	0.392854	0.386856	0.332791	0.360081	0.330777	0.298046	0.361494	0.378135	0.32208	0.420771	0.379059
GID-020	AAC Tenacious	CPSR	2014	0.369848	0.361837	0.344468	0.390626	0.401551	0.370619	0.373833	0.397481	0.375718	0.404164	0.376275	0.405064	0.357424	0.375632	0.373368	0.349327	0.358199	0.381887	0.390198
GID-021	AAC Viewfield	CWRS	2016	0.303744	0.345257	0.436792	0.387156	0.392426	0.356525	0.214677	0.430854	0.299417	0.365907	0.217548	0.363893	0.377517	0.217505	0.436491	0.419201	0.425253	0.285023	0.360852	0.408063
GID-022	AAC Whitefox	CWHWS	2013	0.230837	0.269399	0.385877	0.356678	0.366318	0.338382	0.316573	0.416192	0.301105	0.348922	0.31276	0.348708	0.352907	0.287952	0.418961	0.380715	0.414426	0.263443	0.356635	0.368503	0.344166
GID-023	AC Abbey	CNHR	1998	0.372547	0.353397	0.402487	0.397609	0.408277	0.298261	0.383643	0.409862	0.34877	0.386556	0.37983	0.390798	0.396196	0.381158	0.4118	0.422971	0.394268	0.369506	0.379788	0.366678	0.408705	0.389455
GID-024	AC Andrew	CWSWS	2004	0.406092	0.419416	0.396527	0.430897	0.383986	0.410376	0.418559	0.058007	0.432097	0.429269	0.417059	0.431026	0.412861	0.409648	0.186147	0.403736	0.239086	0.431668	0.399537	0.388913	0.432911	0.417349	0.410119
GID-025	AC Barrie	CWRS	1994	0.274234	0.277075	0.3729	0.334496	0.359935	0.272899	0.324122	0.428332	0.289687	0.348786	0.32141	0.352703	0.343363	0.31448	0.412633	0.375603	0.416107	0.257317	0.388516	0.36609	0.341167	0.346959	0.338843	0.430312
GID-026	AC Cadillac	CWRS	1996	0.288921	0.281338	0.377444	0.325465	0.358324	0.316083	0.312098	0.407549	0.282281	0.331634	0.3082	0.335704	0.347699	0.343287	0.412487	0.374989	0.409481	0.271228	0.36822	0.363422	0.357296	0.348837	0.332191	0.41089	0.131198
GID-027	AC Cora	CNHR	1994	0.253669	0.241697	0.421105	0.352527	0.361409	0.255385	0.276538	0.422981	0.201794	0.356389	0.273149	0.361152	0.330258	0.312409	0.439102	0.426671	0.411412	0.273921	0.377027	0.329915	0.342487	0.294061	0.294774	0.425985	0.203699	0.203724
GID-028	AC Corinne	CWES	1999	0.385828	0.389641	0.367281	0.376103	0.267672	0.403222	0.386042	0.399237	0.406006	0.380987	0.386514	0.380002	0.405963	0.413461	0.40523	0.348685	0.387934	0.394782	0.383643	0.381244	0.44135	0.389113	0.426013	0.402151	0.344439	0.350013	0.403415
GID-029	AC Crystal	CNHR	1996	0.41963	0.406221	0.216767	0.387627	0.367621	0.431625	0.443407	0.385571	0.45326	0.385057	0.444049	0.388184	0.309871	0.428755	0.35091	0.2705	0.399311	0.442207	0.318482	0.317368	0.452789	0.417434	0.37816	0.395253	0.360709	0.378502	0.409422	0.379702
GID-030	AC Domain	CNHR	1993	0.180147	0.275212	0.397556	0.360209	0.379616	0.333519	0.274441	0.41179	0.295947	0.349156	0.270285	0.352712	0.358881	0.203496	0.413689	0.389084	0.417151	0.179933	0.384286	0.354297	0.265059	0.221282	0.409177	0.409048	0.314781	0.344658	0.307346	0.38827	0.415389
GID-031	AC Eatonia	CNHR	1993	0.337118	0.322337	0.384091	0.364065	0.410119	0.256747	0.366892	0.411104	0.333133	0.378031	0.362137	0.38193	0.362822	0.358581	0.395783	0.399623	0.384443	0.357039	0.386085	0.371262	0.384671	0.346566	0.288793	0.41436	0.329072	0.316554	0.248305	0.409177	0.390369	0.351212
GID-032	AC Elsa	CWRS	1996	0.341917	0.337668	0.387044	0.36286	0.359985	0.367323	0.385649	0.447277	0.326553	0.364019	0.382516	0.368525	0.38316	0.413072	0.432271	0.392301	0.455103	0.360328	0.375005	0.41569	0.415733	0.38426	0.359212	0.448908	0.263939	0.220291	0.297185	0.36213	0.368353	0.393803	0.342346
GID-033	AC Foremost	CNHR	1995	0.432225	0.424985	0.179117	0.398938	0.384586	0.444735	0.455745	0.389941	0.464056	0.396967	0.455445	0.399751	0.31544	0.436381	0.33455	0.224831	0.403534	0.448376	0.312398	0.308714	0.444135	0.43106	0.375503	0.397824	0.376377	0.387328	0.434137	0.394182	0.0754863	0.419587	0.394139	0.384919
GID-034	AC Intrepid	CWRS	1997	0.33519	0.329149	0.405961	0.37756	0.369634	0.29312	0.338232	0.410805	0.29102	0.374561	0.33459	0.379059	0.370919	0.371305	0.427516	0.425285	0.418918	0.317496	0.371562	0.352198	0.390969	0.360448	0.295776	0.413718	0.26188	0.256962	0.185961	0.403821	0.346543	0.377303	0.332919	0.254495	0.376017
GID-035	AC Karma	CPSW	1994	0.40395	0.377089	0.275429	0.385999	0.367107	0.413718	0.429183	0.374689	0.438009	0.381715	0.427684	0.383729	0.325808	0.394825	0.346487	0.291063	0.380608	0.419244	0.289264	0.318996	0.451161	0.396525	0.350141	0.365521	0.370222	0.385957	0.405303	0.36445	0.187131	0.395425	0.391655	0.402687	0.174192	0.386728
GID-036	AC Majestic	CNHR	1996	0.271528	0.255891	0.388079	0.369506	0.380601	0.229115	0.312955	0.433082	0.257433	0.375503	0.309571	0.378974	0.355668	0.290335	0.448729	0.406006	0.407498	0.261974	0.36942	0.325122	0.339045	0.249689	0.320367	0.437023	0.200413	0.27247	0.159444	0.398166	0.410633	0.281681	0.284766	0.333634	0.42777	0.271442	0.385957
GID-037	AC Meena	CWSWS	2001	0.388071	0.393567	0.358435	0.406106	0.375918	0.405033	0.408726	0.151844	0.419247	0.401039	0.406665	0.402456	0.378323	0.385365	0.275556	0.371194	0.243499	0.421351	0.37566	0.360201	0.41156	0.388357	0.394984	0.124104	0.413255	0.387341	0.396155	0.389702	0.357624	0.398763	0.39477	0.444507	0.353588	0.405935	0.325589	0.39872
GID-038	AC Michael	CNHR	1994	0.266344	0.238197	0.418396	0.351212	0.361451	0.254948	0.282495	0.430897	0.196727	0.359866	0.279368	0.362651	0.335575	0.324137	0.443791	0.428926	0.410386	0.279325	0.386257	0.334247	0.3462	0.303633	0.287165	0.433039	0.199423	0.201739	0.0347121	0.40335	0.412561	0.31257	0.248479	0.305867	0.436381	0.188116	0.410762	0.157013	0.406622
GID-039	AC Minto	CNHR	1991	0.268058	0.247965	0.43452	0.366035	0.367878	0.256833	0.289435	0.437152	0.216948	0.356096	0.285965	0.360252	0.344229	0.32765	0.455471	0.433639	0.415169	0.281467	0.375375	0.350441	0.355796	0.297978	0.274912	0.440922	0.212767	0.221275	0.0559084	0.413803	0.405878	0.315997	0.254134	0.300288	0.431754	0.182375	0.40742	0.14656	0.409284	0.0477251
GID-040	AC Nanda	CWSWS	1998	0.448505	0.427984	0.389408	0.414617	0.404892	0.411833	0.432182	0.272213	0.45266	0.414703	0.433939	0.415517	0.370791	0.421729	0.31849	0.394396	0.350442	0.453689	0.382572	0.404336	0.426999	0.422919	0.420144	0.266558	0.441245	0.440793	0.4392	0.419201	0.364493	0.432182	0.399966	0.462126	0.375718	0.442935	0.37409	0.433425	0.241036	0.447691	0.447434
GID-041	AC Phil	CWSWS	1996	0.410778	0.433105	0.387831	0.428777	0.378594	0.416735	0.427062	0.148468	0.440561	0.417077	0.426248	0.417549	0.412235	0.41772	0.277673	0.399421	0.191504	0.446132	0.406278	0.38408	0.437433	0.42266	0.400064	0.126655	0.437826	0.411506	0.418666	0.399164	0.367238	0.420591	0.406492	0.440392	0.37598	0.410349	0.360424	0.430319	0.122659	0.421748	0.411549	0.289458
GID-042	AC Reed	CWSWS	1991	0.406992	0.428712	0.38928	0.430683	0.377174	0.417616	0.427684	0.139877	0.43968	0.415089	0.425928	0.417531	0.417959	0.417316	0.272501	0.40772	0.186942	0.444392	0.406949	0.38707	0.437923	0.423733	0.404678	0.111773	0.439136	0.409819	0.422509	0.39354	0.377731	0.41843	0.406435	0.444573	0.384414	0.414617	0.360423	0.434239	0.118263	0.425199	0.416545	0.283138	0.0307049
GID-043	AC Splendor	CWRS	1997	0.285665	0.269257	0.386964	0.327778	0.342044	0.280953	0.312527	0.436424	0.258461	0.330092	0.3088	0.334333	0.354897	0.337289	0.435417	0.3857	0.442448	0.287422	0.364365	0.38133	0.377174	0.290951	0.351641	0.438908	0.202135	0.203496	0.156869	0.371433	0.404721	0.333091	0.306186	0.240247	0.426656	0.220718	0.399494	0.219347	0.416112	0.167466	0.183232	0.43591	0.452261	0.452832
GID-044	AC Taber	CNHR	1991	0.401637	0.399623	0.223971	0.392768	0.364193	0.421858	0.433553	0.376746	0.437323	0.385143	0.434024	0.388613	0.311499	0.417188	0.347819	0.274012	0.38983	0.429612	0.320795	0.318139	0.447991	0.406294	0.361109	0.3842	0.344783	0.367278	0.390457	0.374818	0.0355582	0.402622	0.388998	0.357796	0.088767	0.334633	0.178905	0.393925	0.346374	0.395168	0.387113	0.371605	0.357896	0.368906	0.39204
GID-045	AC Vista	CPSW	1999	0.397224	0.340202	0.320755	0.385186	0.34967	0.396281	0.418602	0.359995	0.430769	0.379959	0.417959	0.382401	0.255248	0.383643	0.353573	0.332148	0.387201	0.410033	0.198312	0.349799	0.41496	0.385042	0.377774	0.375332	0.374613	0.370405	0.376041	0.378888	0.261374	0.384157	0.388613	0.38891	0.251692	0.388484	0.22376	0.363551	0.335509	0.385357	0.366164	0.367535	0.366724	0.365264	0.388656	0.264887
GID-046	AC2000	CPSW	2000	0.390198	0.401722	0.291381	0.396581	0.384372	0.419416	0.440965	0.393154	0.426999	0.384329	0.44315	0.3836	0.367578	0.424428	0.371307	0.300274	0.380134	0.426313	0.314155	0.351769	0.459087	0.396311	0.385485	0.385271	0.405346	0.407934	0.445336	0.366035	0.234898	0.428112	0.433682	0.344792	0.242181	0.393282	0.168923	0.405278	0.356465	0.446963	0.43908	0.398466	0.379323	0.382744	0.390969	0.224274	0.290378
GID-047	Alikat	CNHR	1999	0.28031	0.269471	0.440437	0.369291	0.367021	0.275255	0.308371	0.417531	0.237255	0.360123	0.304301	0.364022	0.341487	0.337675	0.431939	0.433725	0.414695	0.283352	0.370491	0.357467	0.363936	0.321715	0.283652	0.418645	0.218879	0.220847	0.0592551	0.416888	0.399794	0.327992	0.26433	0.303807	0.422415	0.194542	0.397652	0.187859	0.401039	0.0676891	0.0754863	0.446063	0.401307	0.407806	0.178177	0.380773	0.366078	0.438823
GID-048	Alvena	CNHR	2006	0.334247	0.318439	0.38735	0.343715	0.344958	0.284037	0.315868	0.415089	0.292648	0.327264	0.314026	0.331334	0.348813	0.353397	0.430436	0.387842	0.417669	0.302673	0.377217	0.362394	0.36852	0.36649	0.321224	0.416031	0.1875	0.189187	0.197803	0.359781	0.358795	0.363594	0.344315	0.276683	0.388527	0.149516	0.380473	0.261589	0.404818	0.190686	0.190943	0.415603	0.402421	0.408448	0.215748	0.346971	0.376831	0.394739
GID-049	Amazon	CWES	1999	0.408705	0.407377	0.387393	0.389555	0.319681	0.414874	0.404807	0.431625	0.419716	0.379016	0.406221	0.377688	0.421729	0.431968	0.411843	0.367021	0.405516	0.416203	0.382958	0.398552	0.458401	0.415806	0.394139	0.434796	0.361054	0.366807	0.423925	0.0755719	0.386985	0.414832	0.423486	0.364748	0.398723	0.409562	0.363765	0.422586	0.429811	0.4234	0.41843	0.433853	0.419734	0.41813	0.391226	0.381244	0.376574	0.369806
GID-050	Benito	CWRS	1979	0.258547	0.231514	0.417024	0.352926	0.367792	0.244752	0.285922	0.421729	0.201697	0.356953	0.282538	0.360423	0.324865	0.309828	0.434859	0.424728	0.40125	0.281553	0.371176	0.33399	0.34303	0.296092	0.285108	0.424985	0.212853	0.208337	0.0367287	0.394096	0.401508	0.304687	0.237597	0.288614	0.428498	0.181176	0.397652	0.163868	0.392279	0.0381287	0.0679462	0.43184	0.416349	0.420401	0.168752	0.384029	0.36942	0.43351
GID-051	Bhishaj	CWSWS	2003	0.404807	0.403136	0.389837	0.43064	0.379102	0.399837	0.422586	0.0483249	0.427984	0.430469	0.420144	0.432739	0.398038	0.408962	0.233468	0.39611	0.271321	0.436466	0.391997	0.396624	0.43591	0.415892	0.407891	0.102048	0.428762	0.407634	0.416974	0.394782	0.379745	0.411533	0.408962	0.444874	0.387456	0.41029	0.36792	0.436424	0.178597	0.425413	0.432268	0.281381	0.155282	0.155728	0.437452	0.373061	0.357167	0.397095
GID-052	Biggar	CPSR	1989	0.436766	0.433553	0.196955	0.394482	0.382786	0.456045	0.463628	0.380259	0.473567	0.389084	0.463756	0.39264	0.309014	0.439722	0.325103	0.242396	0.394915	0.458401	0.312227	0.308628	0.452703	0.43603	0.386813	0.387627	0.392648	0.399323	0.442719	0.39264	0.061263	0.422586	0.397481	0.378653	0.0351298	0.377731	0.174021	0.445506	0.348263	0.446663	0.443064	0.365693	0.358153	0.370448	0.428884	0.0676035	0.246466	0.235241
GID-053	Bluesky	CWES	1987	0.415774	0.415903	0.330017	0.393197	0.345	0.405749	0.429869	0.390541	0.42687	0.381201	0.430597	0.383215	0.4234	0.452232	0.368902	0.370063	0.365223	0.439637	0.394996	0.401508	0.465556	0.421291	0.382615	0.400994	0.38688	0.384329	0.433536	0.16858	0.353954	0.424471	0.379145	0.343333	0.356353	0.395296	0.340159	0.430083	0.410572	0.433039	0.424042	0.419501	0.365781	0.358881	0.397438	0.352241	0.387927	0.345086
GID-054	Burnside	CWES	2004	0.387842	0.389598	0.372899	0.382572	0.281767	0.403693	0.398338	0.411276	0.393197	0.377945	0.397609	0.381073	0.422029	0.425842	0.42202	0.365264	0.404137	0.409048	0.385999	0.396967	0.452446	0.408265	0.409948	0.415046	0.339575	0.354254	0.404402	0.053166	0.373833	0.401422	0.412475	0.357796	0.393797	0.390155	0.356867	0.396753	0.404947	0.398852	0.391912	0.431154	0.396636	0.390498	0.371048	0.372119	0.373704	0.370705
GID-055	BW1039	CWRS		0.262702	0.287422	0.387736	0.327093	0.366635	0.340588	0.285451	0.421258	0.308157	0.315269	0.284551	0.31574	0.348299	0.25015	0.437092	0.372847	0.425469	0.26146	0.366849	0.386813	0.303145	0.288209	0.412561	0.428712	0.275482	0.291749	0.315455	0.36972	0.392211	0.246209	0.385271	0.378567	0.404892	0.356353	0.392126	0.33082	0.406708	0.323408	0.336432	0.422115	0.432548	0.433468	0.286522	0.3845	0.381201	0.407249
GID-056	BW278	CWRS		0.280182	0.330006	0.398113	0.3839	0.367149	0.355154	0.312612	0.416802	0.335575	0.372419	0.313512	0.374775	0.380601	0.266687	0.424811	0.409005	0.390993	0.269343	0.397524	0.356311	0.300146	0.28868	0.41616	0.420572	0.36312	0.375803	0.341114	0.389341	0.423314	0.137478	0.372247	0.408867	0.427513	0.408277	0.410205	0.332791	0.40791	0.343887	0.353312	0.451075	0.414035	0.412989	0.37726	0.409691	0.391226	0.435353
GID-057	BW493	CWRS		0.339003	0.32388	0.374786	0.369377	0.398038	0.33806	0.357724	0.419073	0.329363	0.370063	0.358881	0.367535	0.348171	0.361751	0.420603	0.354811	0.387287	0.320795	0.403821	0.32645	0.366592	0.356335	0.36128	0.42807	0.226024	0.239525	0.248906	0.361451	0.340331	0.358752	0.361837	0.334492	0.353097	0.305158	0.38857	0.287765	0.408125	0.247365	0.270242	0.437837	0.415149	0.419887	0.278854	0.336732	0.374389	0.41029
GID-058	SY Slate	CWRS	2016	0.259832	0.296804	0.403902	0.351984	0.366935	0.323323	0.302716	0.393454	0.259789	0.343244	0.29916	0.341316	0.379188	0.264416	0.426314	0.345729	0.406766	0.285237	0.372976	0.382229	0.309271	0.280325	0.375503	0.413504	0.299673	0.31484	0.302798	0.383986	0.413761	0.268015	0.377003	0.337453	0.43501	0.330948	0.417873	0.29599	0.406021	0.302202	0.310428	0.435181	0.424277	0.427684	0.30096	0.403307	0.417231	0.404207
GID-059	SY Chert	CWRS	2017	0.27307	0.300531	0.384477	0.342516	0.356439	0.307086	0.265401	0.416117	0.257604	0.331463	0.262274	0.330049	0.370748	0.278082	0.432369	0.367278	0.412583	0.249036	0.337289	0.388441	0.280439	0.287909	0.362008	0.416545	0.276171	0.290292	0.268343	0.379316	0.407292	0.29102	0.354854	0.343848	0.420915	0.308971	0.406606	0.279411	0.406793	0.269771	0.268743	0.441479	0.420763	0.419159	0.242824	0.390755	0.394311	0.410505
GID-060	AAC Concord	CNHR	2016	0.325593	0.311584	0.425858	0.382444	0.414703	0.201868	0.359652	0.424856	0.315269	0.380644	0.357724	0.377945	0.384543	0.327521	0.447183	0.401979	0.423012	0.295305	0.395639	0.385871	0.349242	0.358477	0.259532	0.432568	0.2927	0.335533	0.288509	0.417445	0.440708	0.341402	0.283138	0.397236	0.439765	0.353012	0.417745	0.2687	0.41156	0.284166	0.289821	0.424428	0.432633	0.437495	0.328164	0.428455	0.398852	0.429269
GID-061	AAC Redberry	CWRS	2016	0.287422	0.336218	0.41205	0.364665	0.367021	0.369334	0.213264	0.432696	0.280353	0.337503	0.215192	0.334719	0.380473	0.263902	0.436448	0.383772	0.423443	0.29509	0.372205	0.391055	0.139105	0.30419	0.401122	0.43878	0.373752	0.36188	0.32837	0.386985	0.448976	0.277868	0.388656	0.401828	0.441093	0.378074	0.440579	0.35374	0.428093	0.333219	0.346157	0.443749	0.438162	0.436681	0.348171	0.447605	0.426399	0.430169
GID-062	AAC Goodwin	CPSR	2017	0.281681	0.291834	0.402101	0.348214	0.374218	0.329149	0.241882	0.414103	0.298432	0.332362	0.238669	0.331377	0.368563	0.263988	0.434344	0.394653	0.400302	0.280182	0.386771	0.369463	0.282538	0.338639	0.363851	0.420358	0.220515	0.148102	0.247704	0.38707	0.421729	0.300745	0.347528	0.311231	0.424899	0.307557	0.413846	0.299846	0.393138	0.252592	0.26493	0.44255	0.410649	0.411661	0.260175	0.409305	0.386385	0.449704
GID-063	BW970 Pro	CWRS		0.297104	0.33082	0.43006	0.402279	0.39641	0.324522	0.321566	0.41496	0.317711	0.399537	0.317753	0.397952	0.416031	0.343672	0.431767	0.434667	0.38733	0.298689	0.436809	0.373061	0.303959	0.309375	0.35871	0.420444	0.342674	0.36822	0.294817	0.413032	0.455659	0.315568	0.376917	0.399768	0.46517	0.357681	0.454374	0.290678	0.411732	0.293377	0.294919	0.466541	0.418834	0.417745	0.340888	0.437752	0.431968	0.450047
GID-064	CDC Landmark	CWRS	2016	0.244709	0.289907	0.403945	0.350141	0.373661	0.319253	0.244324	0.411147	0.253663	0.342687	0.240511	0.345215	0.352669	0.266858	0.437564	0.38827	0.422797	0.260946	0.338403	0.362565	0.282752	0.253503	0.360637	0.413032	0.324509	0.339988	0.275466	0.402622	0.428027	0.248522	0.344401	0.384318	0.439422	0.354468	0.404978	0.267843	0.393267	0.280053	0.275512	0.420401	0.424834	0.425328	0.310085	0.40892	0.393968	0.436552
GID-065	Zealand	CWRS	2016	0.318653	0.313127	0.36964	0.355711	0.373576	0.32388	0.354426	0.399494	0.303702	0.351255	0.353012	0.349156	0.356696	0.36505	0.382343	0.3851	0.404956	0.321181	0.368906	0.341059	0.382915	0.334612	0.321823	0.390412	0.237948	0.2316	0.245001	0.365521	0.357938	0.352198	0.339945	0.287241	0.373447	0.193728	0.35254	0.291577	0.387899	0.241839	0.258718	0.42023	0.410821	0.411961	0.238454	0.346114	0.399195	0.373833
GID-066	BYT14-11	CWRS		0.310599	0.305586	0.421784	0.357253	0.34967	0.330906	0.273113	0.418088	0.258461	0.35374	0.275469	0.351469	0.351041	0.258632	0.437564	0.394782	0.420254	0.260603	0.377303	0.365993	0.268529	0.339668	0.353354	0.422714	0.231835	0.21849	0.22063	0.385314	0.391012	0.305501	0.349199	0.344363	0.407035	0.284723	0.411576	0.291834	0.413235	0.225645	0.243724	0.443964	0.429591	0.435267	0.2705	0.378331	0.396967	0.447005
GID-067	BW5020	CWRS		0.299503	0.334504	0.430403	0.377517	0.373361	0.34123	0.253877	0.405792	0.271613	0.358238	0.252806	0.354768	0.387328	0.219347	0.44787	0.394653	0.426158	0.270242	0.389684	0.377089	0.223074	0.335983	0.392554	0.409819	0.277419	0.30413	0.28881	0.398209	0.428412	0.270757	0.368777	0.406034	0.436209	0.359481	0.417188	0.294276	0.39112	0.291834	0.303316	0.422072	0.412278	0.415346	0.33866	0.415474	0.402922	0.44165
GID-068	BYT14-19	CWRS		0.270028	0.286865	0.400815	0.369891	0.377645	0.339602	0.293719	0.422843	0.263559	0.361152	0.293934	0.358624	0.379102	0.283266	0.431467	0.386599	0.417582	0.263731	0.377003	0.367064	0.286394	0.326171	0.367364	0.421301	0.201532	0.196427	0.239209	0.391526	0.400737	0.295433	0.36158	0.328913	0.410248	0.318267	0.417616	0.25272	0.397561	0.242053	0.259704	0.453432	0.420077	0.4234	0.274398	0.391055	0.384157	0.409862
GID-069	Canthatch	CWRS	1959	0.25105	0.249979	0.415266	0.333605	0.35721	0.259189	0.297447	0.415688	0.231385	0.323494	0.29569	0.322594	0.348471	0.321952	0.444607	0.396838	0.403361	0.30036	0.343629	0.360766	0.355497	0.28311	0.3082	0.420144	0.258609	0.253791	0.137132	0.380259	0.434881	0.312098	0.287936	0.273207	0.460672	0.256876	0.40832	0.214292	0.393095	0.135421	0.157184	0.427513	0.41442	0.420358	0.196213	0.416888	0.386514	0.38103
GID-070	Canuck	CWRS	1974	0.393368	0.392468	0.4506	0.429312	0.379316	0.344958	0.393582	0.409434	0.379102	0.413889	0.391055	0.411704	0.409048	0.404892	0.455041	0.458958	0.430209	0.372505	0.443535	0.408834	0.420615	0.426218	0.307857	0.416631	0.361226	0.346414	0.319832	0.404935	0.443792	0.41903	0.380644	0.38346	0.464013	0.359181	0.436081	0.377517	0.416541	0.318696	0.333605	0.422115	0.418234	0.421643	0.366464	0.426656	0.441607	0.446063
GID-071	Carberry	CWRS	2009	0.256105	0.310984	0.410978	0.335233	0.367406	0.351726	0.184689	0.417059	0.218619	0.322466	0.182332	0.326193	0.388484	0.180661	0.436491	0.382015	0.411463	0.265573	0.360595	0.394611	0.194328	0.306333	0.387799	0.418773	0.333936	0.329021	0.30653	0.399109	0.444049	0.231043	0.374047	0.394661	0.452189	0.369463	0.415003	0.324908	0.411345	0.314583	0.324437	0.437795	0.426591	0.422586	0.33716	0.430169	0.414018	0.433211
GID-072	Cardale	CWRS	2011	0.266687	0.299803	0.441209	0.380087	0.377046	0.344486	0.253449	0.433039	0.282495	0.377688	0.253406	0.380216	0.395896	0.268015	0.455514	0.427727	0.422107	0.295947	0.354554	0.375289	0.274055	0.276811	0.377731	0.439294	0.373149	0.369334	0.301939	0.422629	0.460543	0.291834	0.35087	0.411012	0.473396	0.359309	0.429269	0.306101	0.416026	0.305115	0.316168	0.442293	0.449261	0.449704	0.327007	0.444521	0.419201	0.430169
GID-073	CDC Abound	CWRS	2007	0.23447	0.291149	0.438979	0.366293	0.394696	0.33866	0.21849	0.407249	0.256705	0.348299	0.216477	0.35057	0.382444	0.111387	0.428633	0.402451	0.41866	0.233485	0.37983	0.39671	0.1936	0.29395	0.394696	0.40802	0.324725	0.339431	0.313696	0.427256	0.439894	0.165281	0.366207	0.404489	0.455402	0.371305	0.42567	0.318867	0.404174	0.32388	0.329106	0.427898	0.417634	0.414146	0.348428	0.427555	0.413032	0.447734
GID-074	CDC Alsask	CWRS	2005	0.273156	0.254691	0.412264	0.351598	0.367578	0.30066	0.315012	0.41963	0.244066	0.345	0.312741	0.349499	0.368092	0.339003	0.447097	0.41903	0.416419	0.311841	0.36942	0.358538	0.373747	0.33037	0.310085	0.426913	0.222194	0.202639	0.156011	0.372633	0.402408	0.347914	0.303616	0.153126	0.428969	0.200326	0.407377	0.237169	0.403315	0.171236	0.169094	0.452618	0.41352	0.417616	0.195185	0.388356	0.375632	0.400051
GID-076	CDC Bounty	CWRS	2000	0.273584	0.27594	0.398113	0.32735	0.347699	0.294062	0.300274	0.409434	0.247751	0.326322	0.296804	0.330563	0.342558	0.33052	0.417769	0.380816	0.409222	0.250407	0.366592	0.351598	0.34153	0.33384	0.318053	0.405407	0.157627	0.0916802	0.148116	0.362437	0.40395	0.324608	0.293334	0.235398	0.411062	0.235627	0.396667	0.237855	0.388199	0.143475	0.168837	0.443621	0.402764	0.406649	0.1921	0.386128	0.382058	0.413161
GID-077	CDC Bradwell	CWRS	2015	0.292006	0.317496	0.393739	0.336861	0.346928	0.319681	0.333005	0.430683	0.294533	0.334119	0.331934	0.334419	0.363379	0.332148	0.435417	0.35374	0.435079	0.260518	0.376446	0.394525	0.348214	0.310575	0.368777	0.440022	0.216081	0.231942	0.247018	0.371862	0.399837	0.330006	0.334633	0.269302	0.417402	0.304173	0.407377	0.276754	0.421136	0.249807	0.262317	0.447562	0.440004	0.444778	0.234513	0.384671	0.393454	0.397824
GID-078	CDC Go	CWRS	2004	0.258675	0.29659	0.416038	0.358538	0.407163	0.371348	0.246123	0.430683	0.273713	0.323408	0.242224	0.326879	0.395939	0.183061	0.442073	0.385957	0.437535	0.321266	0.381501	0.421515	0.244795	0.312331	0.395853	0.428112	0.387698	0.36972	0.352785	0.417274	0.430169	0.252549	0.403436	0.395777	0.446534	0.371091	0.418602	0.380173	0.416198	0.354083	0.363079	0.445078	0.439961	0.43758	0.365693	0.417659	0.433553	0.409905
GID-079	CDC Imagine	CWRS	2002	0.287722	0.275426	0.377916	0.342516	0.356696	0.254306	0.32238	0.377817	0.279796	0.348256	0.317711	0.351984	0.327907	0.34183	0.411843	0.385271	0.3922	0.291535	0.352112	0.321181	0.382915	0.320386	0.310856	0.387842	0.232352	0.236141	0.180297	0.36278	0.354597	0.346885	0.315183	0.339256	0.374989	0.15757	0.363422	0.242824	0.371581	0.178862	0.19737	0.405235	0.399636	0.403393	0.242224	0.346371	0.36038	0.389341
GID-080	CDC Kernen	CWRS	2010	0.288579	0.277483	0.396784	0.343972	0.363551	0.267586	0.300788	0.39958	0.236526	0.339088	0.29749	0.342644	0.362351	0.324608	0.422449	0.37816	0.400646	0.280053	0.366078	0.3474	0.355925	0.335211	0.311456	0.404978	0.204976	0.164682	0.16425	0.36595	0.39641	0.342944	0.302073	0.286812	0.409862	0.203839	0.396239	0.237512	0.390003	0.162154	0.183832	0.437109	0.413306	0.417359	0.208465	0.388099	0.390455	0.407249
GID-081	CDC Merlin	CWRS	1992	0.317124	0.28572	0.444402	0.371578	0.387216	0.285592	0.309027	0.444497	0.283921	0.370635	0.30727	0.373334	0.374191	0.294846	0.451926	0.424532	0.420531	0.312112	0.400368	0.397712	0.329806	0.327942	0.322351	0.445439	0.320003	0.301615	0.233212	0.423632	0.431558	0.330192	0.305942	0.360601	0.464804	0.28225	0.43927	0.267726	0.432234	0.228182	0.232552	0.438627	0.441823	0.440641	0.300244	0.418791	0.410694	0.442826
GID-082	CDC NRG003	CWSP	2010	0.401679	0.345515	0.320412	0.391355	0.349584	0.400137	0.423828	0.360852	0.437452	0.384072	0.423186	0.386085	0.259961	0.38827	0.355119	0.328035	0.384874	0.413204	0.200111	0.350913	0.416502	0.388641	0.383943	0.377902	0.379261	0.37726	0.380846	0.379573	0.26086	0.389812	0.394268	0.390885	0.250407	0.388913	0.228301	0.368606	0.338257	0.391183	0.370534	0.372247	0.364238	0.36475	0.393454	0.263259	0.0103676	0.287807
GID-083	CDC Osler	CNHR	2004	0.247949	0.25817	0.394283	0.33903	0.334865	0.285352	0.24241	0.4244	0.231417	0.343067	0.238932	0.346545	0.347533	0.323829	0.439504	0.394126	0.403888	0.270323	0.351527	0.340147	0.342036	0.283564	0.321338	0.4171	0.220375	0.19951	0.0902757	0.376433	0.414308	0.312707	0.291837	0.285554	0.439215	0.223644	0.416627	0.197922	0.387311	0.105982	0.131146	0.44338	0.41265	0.413793	0.165157	0.397647	0.38077	0.418646
GID-084	CDC Plentiful	CWRS	2012	0.303402	0.297704	0.374099	0.343715	0.344101	0.325422	0.346543	0.440365	0.312784	0.358453	0.344444	0.361066	0.367492	0.376874	0.42305	0.363251	0.440638	0.310385	0.381673	0.385271	0.379573	0.357963	0.376917	0.443792	0.140152	0.163996	0.269416	0.338017	0.387585	0.36445	0.355368	0.143213	0.398895	0.285837	0.40772	0.278468	0.435737	0.26206	0.280139	0.464185	0.448832	0.450947	0.224231	0.375589	0.391483	0.36972
GID-085	CDC Primepurple	CWSP	2013	0.371449	0.35714	0.301471	0.379504	0.367294	0.365451	0.402039	0.385416	0.395998	0.382332	0.398398	0.380832	0.333019	0.405038	0.354747	0.282936	0.393337	0.398312	0.342487	0.301272	0.432715	0.32777	0.380703	0.398955	0.380483	0.386359	0.362111	0.38246	0.289105	0.380961	0.363866	0.380601	0.284649	0.382931	0.336147	0.365023	0.379112	0.364637	0.377662	0.392185	0.391682	0.402682	0.375648	0.295617	0.328992	0.335933
GID-086	CDC Rama	CWES	2002	0.379445	0.38917	0.395026	0.384714	0.34997	0.373875	0.398938	0.414018	0.378974	0.378459	0.399323	0.380644	0.421515	0.416931	0.454827	0.380516	0.406421	0.384372	0.382915	0.406135	0.425114	0.400039	0.412861	0.417616	0.369619	0.353226	0.394105	0.185117	0.394225	0.388056	0.408534	0.360371	0.402451	0.375332	0.396281	0.386471	0.399708	0.383172	0.37983	0.420358	0.398093	0.393497	0.37953	0.388399	0.386042	0.34997
GID-087	CDC Stanley	CWRS	2010	0.271185	0.285451	0.417839	0.386042	0.37289	0.286008	0.311499	0.394182	0.28408	0.377731	0.308028	0.380002	0.383172	0.313726	0.434602	0.404378	0.416807	0.276283	0.387499	0.363936	0.335447	0.355864	0.33579	0.398552	0.148674	0.19587	0.191839	0.377945	0.411062	0.327436	0.328978	0.32681	0.418602	0.269643	0.400437	0.209751	0.385322	0.187259	0.198912	0.426399	0.408378	0.409562	0.252506	0.396067	0.39491	0.41616
GID-088	CDC Teal	CWRS	1991	0.290059	0.284381	0.397632	0.356175	0.362455	0.242698	0.311223	0.389556	0.271003	0.362025	0.306491	0.366456	0.335828	0.336344	0.42349	0.404267	0.402077	0.26554	0.362972	0.331484	0.376393	0.324234	0.310664	0.397815	0.220815	0.219082	0.161346	0.382587	0.367359	0.347314	0.314492	0.322072	0.397987	0.137996	0.387921	0.229062	0.390036	0.163548	0.177485	0.417301	0.412586	0.415236	0.228632	0.360133	0.372736	0.402331
GID-089	CDC Thrive	CWRS	2010	0.271986	0.261004	0.389729	0.328657	0.347362	0.267997	0.315916	0.387344	0.25976	0.331274	0.311583	0.335393	0.337709	0.330202	0.413485	0.373059	0.399776	0.266495	0.357186	0.337538	0.370785	0.310572	0.32677	0.385071	0.210517	0.186186	0.163401	0.353282	0.387001	0.312655	0.305877	0.283037	0.399786	0.21094	0.376877	0.232904	0.368609	0.157486	0.181038	0.420463	0.395893	0.398927	0.211369	0.3719	0.368855	0.393994
GID-090	CDC Titanium	CWRS	2014	0.28468	0.306658	0.400815	0.362522	0.341059	0.321095	0.309485	0.425756	0.29946	0.361923	0.306358	0.36505	0.369506	0.344529	0.429062	0.388656	0.40961	0.275641	0.386428	0.374775	0.360423	0.345837	0.367706	0.420615	0.224044	0.228986	0.270059	0.342773	0.407163	0.311884	0.352926	0.215356	0.42747	0.282795	0.419587	0.296333	0.420664	0.267501	0.276412	0.438866	0.430362	0.427684	0.233442	0.395082	0.412604	0.371476
GID-091	CDC Utmost	CWRS	2010	0.307686	0.309614	0.398156	0.382358	0.376403	0.326793	0.334804	0.423314	0.292134	0.386299	0.332362	0.388656	0.387199	0.36625	0.443404	0.417916	0.42228	0.338489	0.39264	0.377131	0.398338	0.341381	0.340159	0.431368	0.285468	0.239654	0.241655	0.371176	0.402151	0.362651	0.336775	0.147976	0.432825	0.232285	0.423229	0.296376	0.416026	0.250064	0.26206	0.441993	0.430576	0.43381	0.243167	0.389298	0.398595	0.363379
GID-092	CDC VR Morris	CWRS	2012	0.332962	0.328378	0.389451	0.315097	0.35721	0.326536	0.335575	0.420744	0.296933	0.321952	0.332105	0.325422	0.353526	0.352969	0.411285	0.366078	0.411679	0.287508	0.378588	0.359395	0.36792	0.328099	0.350099	0.419887	0.232352	0.16511	0.211877	0.388827	0.424856	0.362737	0.337289	0.28561	0.417916	0.279239	0.414832	0.268957	0.403916	0.21185	0.237555	0.440365	0.41802	0.421215	0.243167	0.418345	0.406049	0.428412
GID-093	CDC Walrus	CWES	2004	0.402536	0.374047	0.403045	0.40395	0.299803	0.365093	0.394011	0.37576	0.418516	0.396924	0.390969	0.399109	0.401165	0.40892	0.391575	0.380473	0.368455	0.393582	0.396838	0.385614	0.433039	0.396911	0.410076	0.375589	0.345472	0.361494	0.374324	0.128181	0.379788	0.385014	0.36625	0.389082	0.407292	0.377688	0.379445	0.373147	0.3812	0.375932	0.375246	0.397438	0.369338	0.363808	0.377774	0.376703	0.375032	0.411619
GID-094	CDC Whitewood	CWHWS	2013	0.241367	0.271399	0.429931	0.371476	0.366121	0.300317	0.274484	0.393925	0.305415	0.348171	0.277783	0.348642	0.359352	0.166095	0.410512	0.399237	0.422711	0.249293	0.352626	0.385443	0.243681	0.263229	0.388913	0.395639	0.301395	0.343501	0.314855	0.394996	0.418859	0.190429	0.366507	0.381572	0.429912	0.356096	0.402322	0.288921	0.397003	0.322723	0.319124	0.421343	0.420849	0.421558	0.326193	0.405578	0.378117	0.431068
GID-096	CDN Bison	CWES	2009	0.39581	0.401422	0.336664	0.360295	0.258804	0.427084	0.398081	0.428327	0.409648	0.364493	0.396667	0.367278	0.398038	0.411361	0.428117	0.370234	0.417539	0.397053	0.383086	0.412818	0.435053	0.402609	0.415089	0.435096	0.37599	0.370705	0.430662	0.144675	0.342558	0.397909	0.417359	0.347753	0.362694	0.387413	0.334419	0.419801	0.426332	0.428584	0.422757	0.451547	0.419349	0.412775	0.387413	0.342216	0.367278	0.344315
GID-097	Coleman	CWRS	2014	0.282554	0.293494	0.350584	0.320193	0.319614	0.326458	0.268434	0.397831	0.27306	0.327711	0.265976	0.329157	0.333446	0.3	0.394617	0.357494	0.412293	0.294361	0.350699	0.344578	0.284578	0.319926	0.349687	0.402169	0.241959	0.229398	0.239458	0.335277	0.375855	0.304193	0.328096	0.200733	0.375711	0.282892	0.389687	0.287759	0.400193	0.239133	0.257783	0.437398	0.406667	0.408145	0.242651	0.364771	0.361735	0.376819
GID-098	Columbus	CNHR	1980	0.252292	0.236227	0.398585	0.373061	0.386985	0.227444	0.309742	0.430811	0.259104	0.366892	0.306186	0.370534	0.364707	0.286951	0.453753	0.40742	0.415255	0.249507	0.376831	0.324394	0.33052	0.248018	0.319124	0.437837	0.181431	0.249807	0.153566	0.396324	0.419244	0.272899	0.285751	0.334363	0.440665	0.269857	0.397909	0.0505098	0.402628	0.150887	0.141033	0.437152	0.432505	0.431797	0.20114	0.404078	0.370705	0.41406
GID-099	Conquer	CNHR	2010	0.390541	0.381416	0.320926	0.395981	0.365693	0.395168	0.403436	0.418002	0.377731	0.386556	0.405021	0.38977	0.363808	0.389041	0.377791	0.353055	0.413273	0.405749	0.369848	0.339602	0.43381	0.389413	0.348128	0.428112	0.373407	0.386342	0.378787	0.397909	0.278254	0.406606	0.382872	0.36977	0.271999	0.341273	0.299931	0.391226	0.413922	0.386471	0.379959	0.421429	0.424063	0.423271	0.385657	0.27714	0.340931	0.340331
GID-100	Conway	CNHR	1986	0.264245	0.239868	0.42247	0.36188	0.367663	0.24668	0.282281	0.426656	0.205681	0.365907	0.279668	0.368863	0.332105	0.320752	0.447097	0.428969	0.41379	0.278682	0.382872	0.335318	0.34333	0.29862	0.293205	0.433425	0.201102	0.208208	0.0376298	0.404421	0.408834	0.314669	0.257519	0.304708	0.435995	0.183532	0.414403	0.152858	0.405978	0.0256619	0.0499957	0.444735	0.42102	0.427298	0.17205	0.392297	0.38163	0.442807
GID-101	Cutler	CPSR	1991	0.42597	0.435524	0.33006	0.369806	0.372933	0.433596	0.466198	0.368606	0.449147	0.372804	0.463242	0.375332	0.38133	0.445977	0.361688	0.351555	0.414738	0.454631	0.385485	0.425413	0.461529	0.41572	0.440708	0.386771	0.391787	0.411576	0.444692	0.37953	0.310171	0.441093	0.401165	0.37286	0.321052	0.401551	0.383515	0.435567	0.388457	0.449404	0.444692	0.374946	0.365738	0.36822	0.387585	0.317282	0.378588	0.384072
GID-102	Cypress	CWRS	1962	0.404378	0.40742	0.457333	0.420187	0.401122	0.365907	0.404935	0.39671	0.409648	0.400051	0.402236	0.398809	0.40078	0.406906	0.415579	0.428241	0.432278	0.396967	0.41179	0.424985	0.423743	0.412593	0.326664	0.398852	0.400353	0.406777	0.368103	0.397095	0.412475	0.408448	0.354554	0.431913	0.433725	0.395467	0.407077	0.396581	0.401254	0.371176	0.367149	0.372719	0.409064	0.41466	0.413461	0.404593	0.412347	0.43968
GID-103	Enchant	CPSR	2012	0.398081	0.35057	0.323456	0.371305	0.371005	0.39294	0.395039	0.403179	0.40078	0.365736	0.399537	0.367064	0.248479	0.391697	0.390072	0.350141	0.404353	0.40652	0.257861	0.326065	0.394825	0.396697	0.365607	0.416545	0.367467	0.385228	0.361323	0.388056	0.272513	0.384757	0.3851	0.397923	0.26463	0.375546	0.272599	0.360123	0.370722	0.370705	0.361451	0.375332	0.406921	0.407163	0.391055	0.279967	0.157142	0.317282
GID-104	Faller	CNHR	2018	0.310727	0.329449	0.420412	0.34273	0.372847	0.372847	0.247965	0.407077	0.281295	0.328849	0.250236	0.324865	0.385871	0.270157	0.439067	0.37666	0.41323	0.33776	0.36595	0.37983	0.264716	0.318244	0.387756	0.417188	0.377884	0.363251	0.355788	0.371219	0.446834	0.294576	0.402365	0.409296	0.455488	0.399409	0.425242	0.367621	0.411904	0.359781	0.363037	0.43818	0.420763	0.427855	0.373104	0.43441	0.420144	0.429912
GID-105	Fielder	CWSWS	1976	0.42597	0.421986	0.383576	0.429698	0.392383	0.408491	0.444692	0.192271	0.459686	0.428926	0.444135	0.425799	0.388356	0.417873	0.269624	0.381458	0.297867	0.440065	0.391997	0.384029	0.449533	0.423347	0.435738	0.170679	0.418561	0.429569	0.433837	0.396324	0.351212	0.42747	0.404164	0.457577	0.361837	0.426056	0.330991	0.429569	0.137845	0.44255	0.446406	0.20024	0.205635	0.201996	0.427598	0.348556	0.356653	0.356653
GID-106	Fieldstar	CWRS	2008	0.249432	0.282337	0.370207	0.354412	0.351152	0.300313	0.301901	0.398816	0.282938	0.361963	0.296538	0.363722	0.363036	0.306362	0.421888	0.381355	0.394873	0.274958	0.382942	0.327856	0.319276	0.237471	0.335879	0.405766	0.298892	0.339097	0.248958	0.367455	0.402162	0.296237	0.326526	0.370896	0.416148	0.327256	0.403278	0.224377	0.38789	0.250161	0.249217	0.449698	0.402605	0.402377	0.286241	0.385431	0.371616	0.41662
GID-107	FL62R1			0.331848	0.346286	0.395883	0.375161	0.388227	0.377603	0.291963	0.420487	0.310556	0.345429	0.29312	0.348299	0.400823	0.308928	0.421891	0.385528	0.434734	0.351941	0.35374	0.399751	0.310256	0.353121	0.391312	0.42597	0.38447	0.372976	0.360508	0.428926	0.407634	0.364193	0.367278	0.413888	0.412861	0.375718	0.399237	0.346157	0.405033	0.362737	0.355111	0.418259	0.418234	0.417274	0.366807	0.408148	0.398852	0.395939
GID-108	Garnet	CWRS	1923	0.413461	0.409048	0.446827	0.43184	0.415946	0.397267	0.413332	0.396881	0.41993	0.432182	0.41466	0.43411	0.406263	0.397995	0.390502	0.437752	0.37005	0.41119	0.422929	0.38103	0.404978	0.419105	0.401808	0.408191	0.407412	0.407977	0.391959	0.405578	0.429355	0.408191	0.394482	0.439294	0.440494	0.413204	0.427813	0.413032	0.412376	0.395682	0.404078	0.400908	0.405378	0.403693	0.431368	0.427727	0.404121	0.444821
GID-109	Glencross	CWES	2008	0.391569	0.379016	0.369082	0.386385	0.298175	0.410076	0.388184	0.415174	0.374989	0.388784	0.387799	0.392254	0.39928	0.419373	0.419143	0.382958	0.407412	0.396581	0.380559	0.372419	0.444778	0.403681	0.397053	0.420572	0.350637	0.358495	0.385308	0.10042	0.366849	0.393411	0.393668	0.360414	0.384157	0.377431	0.3456	0.396795	0.411947	0.382615	0.377474	0.429226	0.419306	0.411019	0.366121	0.365479	0.361409	0.377089
GID-110	Glenlea	CWES	1972	0.394696	0.395253	0.375472	0.382315	0.273199	0.41029	0.396967	0.408106	0.413161	0.373576	0.396153	0.37636	0.414232	0.425156	0.415064	0.361666	0.396251	0.404935	0.380516	0.39294	0.453989	0.405009	0.415089	0.41239	0.349217	0.35314	0.410838	0.0244623	0.372976	0.399366	0.41496	0.350586	0.386342	0.391954	0.354297	0.407292	0.400567	0.410248	0.403393	0.429698	0.393979	0.388956	0.376874	0.366635	0.368049	0.36248
GID-111	Glenn	CWRS	2009	0.295305	0.339988	0.40536	0.36792	0.372162	0.367192	0.213949	0.436038	0.290206	0.343415	0.21879	0.346457	0.384157	0.254134	0.447956	0.378202	0.418487	0.309142	0.374861	0.399109	0.123854	0.320943	0.421086	0.440922	0.36807	0.366764	0.35257	0.398038	0.436466	0.290292	0.390027	0.403588	0.435438	0.399323	0.445634	0.360166	0.418431	0.356525	0.367149	0.450861	0.435805	0.433853	0.364879	0.434838	0.422457	0.428455
GID-112	Go Early	CWRS	2015	0.279882	0.303402	0.398928	0.379059	0.380987	0.316297	0.288579	0.419416	0.274698	0.36098	0.284166	0.364193	0.390069	0.293719	0.435117	0.379916	0.418875	0.335875	0.385485	0.359781	0.34183	0.316102	0.352455	0.419673	0.307679	0.319724	0.263666	0.383472	0.381972	0.299632	0.379916	0.311875	0.41059	0.187944	0.405706	0.316554	0.409799	0.266044	0.277354	0.438437	0.43739	0.436509	0.271656	0.368777	0.431111	0.381416
GID-113	Goodeve	CWRS	2007	0.304202	0.287385	0.382731	0.355514	0.330357	0.30461	0.310503	0.404107	0.291283	0.362495	0.304519	0.366439	0.378088	0.317075	0.415322	0.369702	0.409506	0.30257	0.364897	0.358778	0.346131	0.321131	0.348171	0.402702	0.247779	0.230497	0.257572	0.350891	0.398803	0.296587	0.318254	0.161353	0.412855	0.242555	0.423009	0.247768	0.403435	0.252935	0.253615	0.436426	0.416772	0.419111	0.230452	0.390282	0.37351	0.38797
GID-114	GP112	CWSP		0.394096	0.398595	0.308276	0.373576	0.355711	0.383643	0.412047	0.393197	0.424728	0.362694	0.41209	0.361794	0.379016	0.38977	0.367829	0.331763	0.395863	0.399109	0.356696	0.354383	0.431454	0.401067	0.394439	0.40108	0.367898	0.37756	0.413499	0.277311	0.305287	0.399709	0.394396	0.379555	0.326622	0.395553	0.33519	0.388784	0.397904	0.422843	0.413332	0.412561	0.402464	0.407206	0.362223	0.3082	0.350741	0.327436
GID-115	CDC Throttle	CWSP	2016	0.352926	0.361794	0.36042	0.243981	0.295862	0.379316	0.375332	0.399494	0.355368	0.251607	0.375118	0.254648	0.293891	0.394439	0.424983	0.343629	0.413402	0.348599	0.324008	0.402493	0.38043	0.354064	0.400908	0.400865	0.347237	0.330392	0.365871	0.270414	0.384586	0.362308	0.398124	0.380542	0.388956	0.395082	0.373961	0.368863	0.386482	0.369848	0.377645	0.402922	0.418534	0.411276	0.359952	0.387499	0.364836	0.39174
GID-116	AAC Awesome	CWSP	2016	0.401551	0.4219	0.394125	0.433296	0.389213	0.407806	0.429012	0.0853397	0.432953	0.432439	0.429226	0.43214	0.405407	0.408791	0.244718	0.405107	0.257531	0.439722	0.402965	0.391997	0.428198	0.425961	0.399409	0.130152	0.436768	0.419116	0.425899	0.407035	0.404593	0.412561	0.41616	0.461654	0.405449	0.424257	0.389341	0.438566	0.199725	0.43501	0.438694	0.286865	0.185665	0.187516	0.44225	0.395596	0.372247	0.40772
GID-117	GP168	CWSP		0.413118	0.436466	0.428345	0.436981	0.382444	0.40335	0.419587	0.239397	0.420272	0.433382	0.418516	0.43094	0.428627	0.424728	0.359885	0.413932	0.333894	0.423014	0.414446	0.43501	0.425885	0.407837	0.406092	0.280781	0.419895	0.414489	0.414314	0.409691	0.434324	0.442978	0.435867	0.446762	0.43501	0.426741	0.433982	0.429226	0.319663	0.424985	0.427127	0.361152	0.277416	0.28091	0.419373	0.425071	0.421772	0.422886
GID-118	Grandin	CWRS	1998	0.245202	0.298669	0.437743	0.345738	0.388183	0.359786	0.191476	0.423626	0.249481	0.307054	0.188192	0.310123	0.393024	0.103951	0.444146	0.375692	0.425497	0.286653	0.369597	0.413857	0.196577	0.294277	0.400156	0.424101	0.360202	0.343275	0.332554	0.408022	0.459241	0.229729	0.38425	0.397359	0.47545	0.384812	0.439618	0.354901	0.416056	0.343231	0.352135	0.434258	0.435103	0.433091	0.339557	0.445453	0.429806	0.430714
GID-119	Harvest	CNHR	2002	0.215063	0.271999	0.389365	0.374304	0.370491	0.313426	0.261203	0.415688	0.302502	0.369677	0.257304	0.373661	0.362694	0.246551	0.417168	0.398809	0.40125	0.204824	0.38707	0.345857	0.282838	0.260315	0.359695	0.413118	0.294077	0.307857	0.271175	0.39174	0.406006	0.102348	0.310556	0.381228	0.408748	0.335104	0.397524	0.260218	0.400782	0.26206	0.257433	0.443107	0.416949	0.413846	0.316168	0.393154	0.373661	0.439037
GID-120	Helios	CWRS	2006	0.263253	0.263767	0.384635	0.340904	0.368931	0.269295	0.314635	0.417613	0.288922	0.342618	0.311678	0.34669	0.364731	0.307307	0.428676	0.37973	0.410423	0.247439	0.38603	0.351446	0.328605	0.338012	0.321148	0.420699	0.0635522	0.113478	0.217606	0.351446	0.381144	0.301436	0.318577	0.263931	0.388001	0.271866	0.385772	0.208914	0.400601	0.211399	0.222027	0.459182	0.431134	0.429526	0.215299	0.370345	0.378444	0.418213
GID-121	CDC Cordon CLPlus	CNHR	2018	0.267972	0.305715	0.383919	0.358324	0.387413	0.354083	0.2693	0.451375	0.274184	0.327478	0.266601	0.324694	0.367364	0.256362	0.457575	0.3854	0.417065	0.283866	0.362265	0.386771	0.302073	0.287823	0.371219	0.453003	0.350422	0.340802	0.313353	0.39204	0.422929	0.264759	0.384286	0.373417	0.438094	0.350655	0.400308	0.317753	0.432988	0.316254	0.324908	0.461743	0.45856	0.458187	0.325893	0.407763	0.418173	0.41089
GID-122	SY Rowyn	CPSR	2016	0.311627	0.323751	0.348628	0.294191	0.316254	0.349499	0.311413	0.398638	0.322295	0.305929	0.314797	0.301774	0.320281	0.328721	0.409653	0.340802	0.405904	0.312441	0.343972	0.340031	0.367149	0.309718	0.387199	0.40455	0.339101	0.325765	0.319317	0.347528	0.37379	0.320067	0.371048	0.363718	0.391098	0.351984	0.369163	0.329706	0.364753	0.330092	0.341487	0.424428	0.409749	0.410505	0.315568	0.36625	0.369977	0.37726
GID-123	Prosper	CNHR	2018	0.312184	0.333219	0.419382	0.343672	0.375075	0.374904	0.249336	0.408277	0.283438	0.330477	0.252035	0.324865	0.387927	0.273755	0.438294	0.378631	0.414006	0.336561	0.368263	0.382744	0.268143	0.319787	0.390583	0.416074	0.380897	0.366335	0.358878	0.372847	0.446149	0.295519	0.401851	0.408952	0.454545	0.399409	0.424128	0.370448	0.412677	0.36278	0.36655	0.438951	0.421706	0.429226	0.373019	0.433725	0.423828	0.429569
GID-124	AAC Castle	CPSR	2018	0.390798	0.392897	0.303774	0.222646	0.3064	0.400394	0.389641	0.411319	0.387756	0.255291	0.393454	0.254391	0.257476	0.403093	0.357695	0.31801	0.404137	0.368992	0.348942	0.365736	0.399966	0.382343	0.387456	0.413975	0.381543	0.36972	0.366343	0.335704	0.35314	0.381158	0.364964	0.38788	0.346371	0.380259	0.344058	0.403479	0.405892	0.371476	0.377645	0.402579	0.418749	0.422243	0.380002	0.350741	0.344015	0.367149
GID-125	HY320	CPSR	1985	0.439637	0.436766	0.202487	0.399666	0.386514	0.456516	0.463242	0.382358	0.476352	0.391869	0.465513	0.388998	0.312484	0.439422	0.325318	0.241239	0.394527	0.45673	0.308157	0.309699	0.448633	0.434873	0.392597	0.389041	0.397512	0.404078	0.444735	0.391312	0.0694456	0.426656	0.402665	0.383589	0.0411704	0.383001	0.179548	0.448034	0.349852	0.449105	0.446448	0.368306	0.359053	0.374604	0.432439	0.0739868	0.251821	0.235455
GID-126	Genesis	CPSW	1990	0.421086	0.407163	0.300815	0.374175	0.385014	0.400009	0.425928	0.31831	0.441008	0.36852	0.42597	0.369163	0.311584	0.412561	0.300369	0.299974	0.358974	0.426527	0.310428	0.325765	0.435395	0.410493	0.368734	0.309485	0.400956	0.386214	0.398653	0.401808	0.227401	0.415389	0.349499	0.413544	0.213863	0.379959	0.212235	0.405835	0.290248	0.403393	0.400566	0.315997	0.301371	0.304387	0.407035	0.2304	0.267886	0.28785
GID-127	CDC Terrain	CPSR	2016	0.37696	0.386085	0.336021	0.231171	0.317154	0.364622	0.366207	0.417359	0.366721	0.257304	0.370105	0.255634	0.302416	0.37409	0.386852	0.348899	0.383883	0.339817	0.34907	0.394482	0.373875	0.364947	0.385271	0.417188	0.341038	0.338831	0.370892	0.348428	0.366121	0.392169	0.371091	0.367795	0.368178	0.357253	0.37289	0.374647	0.396144	0.375204	0.385228	0.387456	0.428819	0.426142	0.339945	0.374347	0.378588	0.386728
GID-128	Infinity	CWRS	2004	0.323751	0.300231	0.358748	0.361751	0.380216	0.346029	0.368777	0.446149	0.33399	0.378202	0.367107	0.381673	0.35691	0.375975	0.435031	0.409648	0.423314	0.335447	0.409648	0.364322	0.387328	0.367775	0.349799	0.44692	0.234203	0.234042	0.249635	0.372076	0.362094	0.348128	0.337675	0.173598	0.377688	0.270799	0.391055	0.29102	0.430111	0.256533	0.271956	0.464656	0.436533	0.439508	0.271828	0.353526	0.370705	0.413204
GID-129	Invader	CWRS	1993	0.266408	0.279191	0.410244	0.368022	0.368324	0.321842	0.307596	0.410846	0.277685	0.362557	0.306262	0.363891	0.387562	0.320293	0.42207	0.392813	0.390074	0.304067	0.387777	0.402582	0.303206	0.294228	0.368582	0.416613	0.351222	0.341425	0.27096	0.412912	0.454056	0.288961	0.346546	0.356083	0.458489	0.325715	0.451775	0.304454	0.409965	0.26813	0.277728	0.437228	0.408236	0.40921	0.312115	0.440284	0.405509	0.4272
GID-130	Journey	CWRS	2002	0.278049	0.295548	0.395089	0.341954	0.369446	0.271616	0.304212	0.412163	0.261537	0.339381	0.299279	0.341997	0.373949	0.271402	0.438182	0.353363	0.430044	0.239321	0.346028	0.383213	0.327029	0.299382	0.356579	0.415509	0.289968	0.281266	0.261684	0.397881	0.419497	0.302968	0.361897	0.362148	0.433908	0.274232	0.41375	0.270544	0.411805	0.264153	0.269815	0.440985	0.434875	0.436524	0.269686	0.411177	0.399768	0.39964
GID-131	Kanata	CWHWS	2006	0.240639	0.287379	0.39241	0.374518	0.375932	0.293163	0.304001	0.405621	0.317453	0.366892	0.302331	0.369077	0.362994	0.253277	0.423179	0.406992	0.394958	0.261589	0.377089	0.334504	0.309014	0.213055	0.361366	0.409134	0.278495	0.326236	0.270317	0.398895	0.396795	0.167681	0.326793	0.382516	0.41676	0.341487	0.365264	0.193857	0.383819	0.27684	0.270071	0.413675	0.414035	0.411747	0.288022	0.383515	0.360338	0.410805
GID-132	Kane	CNHR	2006	0.214249	0.288322	0.38066	0.350955	0.359995	0.313212	0.269643	0.39928	0.294748	0.350013	0.263174	0.353654	0.352198	0.241025	0.420474	0.395168	0.399138	0.201354	0.382315	0.32645	0.278682	0.238249	0.36128	0.404678	0.283316	0.322894	0.27671	0.361537	0.395767	0.148745	0.347014	0.393975	0.405535	0.344486	0.374861	0.239097	0.382789	0.279239	0.284209	0.429612	0.407692	0.404892	0.317925	0.381887	0.380045	0.411576
GID-133	Katepwa	CNHR	1981	0.265144	0.247365	0.427916	0.356953	0.363508	0.261546	0.287379	0.433982	0.207266	0.348042	0.283309	0.352798	0.34123	0.326279	0.44903	0.434581	0.416591	0.279582	0.376403	0.340416	0.350056	0.304405	0.281253	0.436552	0.202092	0.208851	0.0298206	0.413546	0.399794	0.316854	0.258247	0.292048	0.425242	0.17295	0.401422	0.160783	0.41083	0.032388	0.0397567	0.450947	0.411121	0.417059	0.164982	0.381715	0.374218	0.43848
GID-134	Kenyon	CWRS	1985	0.265102	0.244838	0.418353	0.361366	0.372547	0.256362	0.283138	0.433339	0.203453	0.368992	0.280353	0.372804	0.336903	0.326836	0.441	0.437795	0.409524	0.282966	0.386214	0.3468	0.338274	0.307618	0.305801	0.43411	0.206095	0.208294	0.0525187	0.402879	0.4222	0.318267	0.25769	0.310974	0.444478	0.196984	0.413546	0.166995	0.409671	0.0385143	0.0672179	0.45099	0.421106	0.424471	0.17762	0.405664	0.386599	0.449404
GID-135	Lancer	CWRS	1985	0.340031	0.32585	0.385892	0.372633	0.413632	0.268572	0.374004	0.406992	0.341359	0.381972	0.369077	0.3845	0.364193	0.365264	0.385907	0.395253	0.380909	0.357039	0.381887	0.359095	0.395896	0.351108	0.279882	0.411619	0.329029	0.312355	0.259032	0.405235	0.391655	0.359609	0.043441	0.346466	0.389598	0.337032	0.39671	0.293934	0.390819	0.261246	0.26493	0.403736	0.396893	0.399837	0.304815	0.388313	0.3839	0.426741
GID-136	Laser	CWES	1999	0.390684	0.406239	0.338423	0.3771	0.299152	0.428137	0.427751	0.397412	0.39844	0.36073	0.427623	0.362316	0.399426	0.422695	0.419036	0.35276	0.391267	0.405125	0.382242	0.407868	0.464218	0.412827	0.409796	0.400497	0.360071	0.353231	0.398541	0.174966	0.315735	0.405039	0.423809	0.33299	0.330905	0.36283	0.330219	0.401311	0.387183	0.401526	0.394069	0.412239	0.378135	0.379028	0.371058	0.305279	0.381599	0.322635
GID-137	Laura	CWRS	1986	0.367835	0.366164	0.398371	0.389041	0.359095	0.387285	0.383472	0.436252	0.352455	0.386471	0.384372	0.390198	0.401765	0.403607	0.428633	0.3857	0.463478	0.382872	0.371048	0.421343	0.413846	0.390612	0.380687	0.445934	0.338843	0.323965	0.315627	0.392083	0.367364	0.398209	0.368992	0.115961	0.381673	0.244366	0.399409	0.358667	0.447889	0.32615	0.318696	0.441308	0.44249	0.448376	0.262445	0.358538	0.38917	0.343415
GID-138	Leader	CNHR	1981	0.357596	0.339388	0.405103	0.383001	0.418345	0.258547	0.3836	0.415988	0.345643	0.394568	0.381758	0.397095	0.378588	0.373404	0.399906	0.398081	0.398147	0.362094	0.391655	0.383001	0.401122	0.360277	0.269771	0.419244	0.334754	0.32238	0.260834	0.411918	0.398423	0.369377	0.0359866	0.348955	0.399109	0.340716	0.392768	0.299846	0.408683	0.263131	0.268015	0.385057	0.420206	0.420915	0.310556	0.394739	0.403864	0.438309
GID-139	Lillian	CNHR	2003	0.332705	0.310299	0.414837	0.380987	0.381801	0.178477	0.349285	0.450133	0.31227	0.377303	0.345814	0.381458	0.384114	0.382015	0.445981	0.396924	0.428313	0.342601	0.392297	0.388013	0.387456	0.335811	0.300917	0.451332	0.280303	0.323451	0.263795	0.384029	0.430597	0.362051	0.254862	0.32093	0.446191	0.335704	0.417059	0.255334	0.427449	0.264031	0.263945	0.399409	0.454789	0.454031	0.265873	0.424856	0.404935	0.41436
GID-140	Lovitt	CWRS	2002	0.262459	0.24549	0.395582	0.349445	0.369456	0.289026	0.302867	0.423276	0.238848	0.341561	0.302481	0.346317	0.330462	0.32622	0.440278	0.410507	0.410043	0.282856	0.376484	0.347088	0.352145	0.309655	0.311994	0.430561	0.161967	0.144106	0.113686	0.37914	0.381626	0.31825	0.285298	0.263007	0.405451	0.231778	0.39071	0.187942	0.400438	0.116382	0.127523	0.445644	0.412023	0.414063	0.203882	0.364914	0.369328	0.428376
GID-141	Manitou	CWRS	1965	0.256475	0.249014	0.431368	0.348585	0.367238	0.253002	0.294983	0.434091	0.227401	0.344726	0.292196	0.347599	0.35476	0.307333	0.458566	0.412393	0.410991	0.296955	0.363937	0.359305	0.356389	0.28342	0.295369	0.437822	0.242783	0.239065	0.109646	0.391638	0.437693	0.312736	0.255274	0.252459	0.464537	0.228816	0.421827	0.194683	0.406319	0.108576	0.128473	0.440094	0.430897	0.434863	0.17084	0.420369	0.395798	0.398671
GID-142	Marquis	CWRS	1923	0.325508	0.323665	0.410377	0.41029	0.382144	0.343587	0.351084	0.37636	0.338831	0.397438	0.345643	0.402108	0.377774	0.351684	0.4042	0.42717	0.382719	0.35751	0.386042	0.359566	0.377174	0.353036	0.317111	0.392297	0.327695	0.302459	0.260405	0.386342	0.398038	0.366764	0.331463	0.34226	0.418773	0.292434	0.390926	0.304344	0.391978	0.266173	0.27397	0.414403	0.404007	0.399709	0.325765	0.383472	0.366035	0.410162
GID-143	McKenzie	CNHR	1997	0.246808	0.292863	0.389494	0.349927	0.347228	0.313469	0.306658	0.405192	0.285408	0.36038	0.302159	0.36445	0.369591	0.328421	0.432626	0.400651	0.396725	0.263131	0.38163	0.363636	0.328978	0.236621	0.337803	0.411361	0.323347	0.337974	0.248563	0.388013	0.423614	0.319853	0.324137	0.374018	0.441864	0.320667	0.4225	0.246294	0.397819	0.247622	0.247537	0.460201	0.408207	0.406178	0.287165	0.405364	0.392211	0.424685
GID-144	Minnedosa	CWSP	2009	0.378947	0.326293	0.326086	0.374834	0.354998	0.375819	0.407609	0.367379	0.419005	0.37462	0.406795	0.377747	0.256373	0.373592	0.3669	0.343987	0.399716	0.39467	0.209631	0.350156	0.411465	0.371647	0.352513	0.384774	0.357927	0.354741	0.354302	0.397284	0.279937	0.377362	0.372435	0.381502	0.266227	0.367294	0.236451	0.34223	0.337671	0.360996	0.343473	0.374106	0.377539	0.376248	0.36935	0.283278	0.0510689	0.309156
GID-145	Muchmore	CNHR	2009	0.281595	0.331077	0.424657	0.353526	0.38887	0.366164	0.182846	0.435353	0.250536	0.336818	0.178776	0.339945	0.404293	0.180362	0.453968	0.383343	0.431545	0.287122	0.358324	0.406735	0.186145	0.324971	0.394182	0.43758	0.362302	0.363336	0.333948	0.414832	0.45446	0.253706	0.385228	0.421784	0.459943	0.394096	0.430897	0.333176	0.424013	0.342816	0.346843	0.435781	0.443947	0.441907	0.364622	0.438609	0.429141	0.433339
GID-146	Napayo	CWRS	1972	0.257647	0.258547	0.430789	0.347143	0.361923	0.258675	0.297618	0.423057	0.2313	0.340802	0.295262	0.341445	0.353354	0.307043	0.44787	0.409948	0.397802	0.292306	0.354683	0.360852	0.351041	0.289451	0.294405	0.427513	0.24759	0.243253	0.123745	0.383772	0.437795	0.318953	0.266087	0.253637	0.463671	0.230486	0.422971	0.20778	0.399279	0.123683	0.14219	0.433596	0.420334	0.425842	0.185503	0.419973	0.392768	0.394825
GID-147	Neepawa	CNHR	1969	0.259918	0.235198	0.421998	0.353354	0.358367	0.248351	0.27804	0.42687	0.195784	0.358067	0.274141	0.362822	0.332662	0.319853	0.442803	0.426613	0.409395	0.272813	0.384543	0.332277	0.343458	0.297292	0.285794	0.430811	0.193569	0.199597	0.0281902	0.40275	0.409477	0.308628	0.247708	0.298399	0.433296	0.17989	0.411104	0.151358	0.402585	0.0160226	0.0419844	0.443407	0.418063	0.4228	0.157784	0.389512	0.381501	0.443107
GID-148	Oslo	CNHR	1987	0.442207	0.445078	0.309734	0.405492	0.396367	0.439123	0.469754	0.40892	0.467012	0.398552	0.473053	0.396881	0.433039	0.4617	0.372982	0.357938	0.395044	0.439251	0.394268	0.410719	0.459686	0.432345	0.401508	0.407634	0.385589	0.399023	0.463615	0.380773	0.28965	0.477037	0.434282	0.35638	0.29222	0.400394	0.339945	0.436552	0.394856	0.467012	0.459215	0.408234	0.398779	0.398252	0.40742	0.292391	0.381887	0.336646
GID-149	Owens	CWSWS	1984	0.447177	0.413803	0.404588	0.445849	0.38043	0.404935	0.431197	0.261974	0.459815	0.452018	0.433125	0.450261	0.389941	0.423657	0.31819	0.407035	0.335186	0.436595	0.395467	0.380473	0.43501	0.425018	0.418645	0.25452	0.423123	0.434838	0.431949	0.389598	0.367963	0.440022	0.441565	0.460109	0.381844	0.428241	0.348428	0.428926	0.234766	0.434539	0.435224	0.278597	0.276602	0.269043	0.442978	0.357339	0.348642	0.363208
GID-150	Parata	CWRS	2015	0.215192	0.263131	0.416681	0.343844	0.378331	0.345857	0.233656	0.416245	0.266472	0.313169	0.232671	0.310128	0.359224	0.20838	0.43589	0.37289	0.428787	0.254563	0.358838	0.387113	0.254862	0.253631	0.41269	0.414446	0.342588	0.340117	0.287694	0.41149	0.433725	0.185417	0.371605	0.386207	0.455574	0.359738	0.42627	0.314926	0.414094	0.298004	0.309228	0.429526	0.430191	0.431454	0.29162	0.417274	0.411918	0.416545
GID-151	Park	CNHR	1963	0.287293	0.296676	0.425729	0.369591	0.362694	0.293891	0.309528	0.419373	0.290678	0.356996	0.304858	0.361152	0.373404	0.343287	0.453452	0.42717	0.400517	0.327693	0.36445	0.387242	0.379231	0.319272	0.302973	0.421258	0.295196	0.267843	0.210418	0.409562	0.44542	0.353312	0.313726	0.309	0.466841	0.29252	0.421601	0.263474	0.401855	0.20251	0.216819	0.432225	0.41412	0.413418	0.242995	0.428798	0.38797	0.386342
GID-152	Pasqua	CNHR	1990	0.267758	0.258975	0.401544	0.336432	0.367235	0.260132	0.301302	0.419973	0.227958	0.342858	0.298261	0.343844	0.35404	0.335918	0.431725	0.395382	0.401681	0.283823	0.375932	0.360252	0.360209	0.300934	0.329192	0.425114	0.192536	0.181047	0.142624	0.370577	0.424428	0.33866	0.297618	0.272177	0.437109	0.234599	0.41586	0.19964	0.408039	0.139534	0.158727	0.434024	0.428562	0.431583	0.166995	0.408063	0.405449	0.406992
GID-153	Pasteur	CWSP	2011	0.406863	0.391055	0.417453	0.427813	0.424257	0.416117	0.412989	0.379745	0.422757	0.408534	0.412261	0.409605	0.395382	0.39551	0.389299	0.408791	0.383279	0.416074	0.38797	0.354725	0.411147	0.386199	0.366592	0.386428	0.412147	0.399066	0.380975	0.409776	0.388313	0.409477	0.390541	0.422557	0.402279	0.391183	0.358838	0.380644	0.379139	0.390284	0.379659	0.385742	0.38438	0.382272	0.409262	0.387542	0.368992	0.393754
GID-154	Peace	CWRS	2004	0.324137	0.295562	0.380875	0.329749	0.339988	0.305544	0.311327	0.425542	0.295904	0.341487	0.310171	0.339731	0.32328	0.344743	0.406304	0.3845	0.423702	0.299589	0.383729	0.346457	0.356268	0.351493	0.336732	0.428284	0.146694	0.13495	0.154982	0.353269	0.356568	0.350998	0.30293	0.266941	0.376103	0.244795	0.383815	0.252763	0.412247	0.156242	0.176891	0.428455	0.428477	0.434924	0.188844	0.340031	0.375032	0.42807
GID-155	Pembina	CNHR	1959	0.294559	0.28946	0.421091	0.378321	0.358569	0.317952	0.33599	0.417395	0.293231	0.376949	0.33389	0.376221	0.372194	0.347729	0.443056	0.419452	0.401715	0.335476	0.383376	0.367524	0.388646	0.302888	0.359426	0.427506	0.312312	0.30467	0.225755	0.35617	0.452614	0.345244	0.330506	0.332589	0.473865	0.305013	0.417224	0.255056	0.407473	0.227849	0.24413	0.449272	0.428642	0.434319	0.260626	0.442159	0.396701	0.391045
GID-156	Pitic 62	CWES	1969	0.397481	0.373533	0.359005	0.41586	0.380516	0.383343	0.425885	0.303873	0.436766	0.393154	0.425585	0.391312	0.323794	0.403093	0.325146	0.366592	0.350743	0.411918	0.310385	0.367878	0.416588	0.390141	0.394225	0.299417	0.408359	0.407249	0.410366	0.43441	0.310213	0.394354	0.396324	0.420197	0.30096	0.405278	0.261289	0.390883	0.27934	0.42023	0.408234	0.315526	0.305442	0.305372	0.418559	0.310299	0.242824	0.343929
GID-157	Prodigy	CWRS	1998	0.256962	0.289907	0.398542	0.36822	0.363893	0.324908	0.271056	0.428798	0.284937	0.340031	0.269985	0.342301	0.372633	0.279882	0.432884	0.39264	0.402887	0.264459	0.347914	0.370791	0.272042	0.285166	0.379659	0.427341	0.294809	0.291492	0.242684	0.385143	0.429997	0.26583	0.338489	0.34608	0.439422	0.306658	0.411918	0.259532	0.40237	0.240382	0.249893	0.445078	0.424877	0.424214	0.274012	0.413375	0.393197	0.412561
GID-158	AAC Tisdale	CWRS	2017	0.243664	0.288606	0.397862	0.334577	0.380248	0.334534	0.244479	0.419486	0.184828	0.320297	0.246409	0.319225	0.364167	0.242721	0.428154	0.3721	0.407773	0.245722	0.383121	0.377203	0.253441	0.254139	0.382992	0.417942	0.334698	0.327716	0.272731	0.400403	0.447361	0.20181	0.345083	0.365538	0.450491	0.374887	0.420044	0.310691	0.407368	0.278914	0.288306	0.439427	0.421092	0.421159	0.311677	0.432394	0.418929	0.428578
GID-159	PT472	CWRS		0.261846	0.306186	0.402573	0.36882	0.357553	0.337332	0.34997	0.422629	0.355539	0.349027	0.347442	0.34907	0.371091	0.296333	0.422321	0.362308	0.43301	0.228558	0.36248	0.379959	0.343587	0.285038	0.381287	0.425542	0.298984	0.313255	0.319059	0.361837	0.374904	0.173978	0.376017	0.29973	0.379959	0.337675	0.387585	0.304858	0.419247	0.326921	0.3079	0.443621	0.425648	0.427298	0.289778	0.363851	0.355925	0.383258
GID-160	PT479	CWRS		0.262145	0.263045	0.412135	0.355239	0.351941	0.294019	0.25302	0.417616	0.276412	0.359524	0.252121	0.359481	0.353312	0.276497	0.434773	0.413761	0.405775	0.25859	0.374261	0.351984	0.30353	0.284481	0.36188	0.416074	0.276773	0.260432	0.19776	0.397609	0.431154	0.247194	0.324479	0.355993	0.449919	0.280482	0.4219	0.252806	0.396401	0.206495	0.226116	0.438609	0.415449	0.418602	0.244838	0.41616	0.38947	0.431283
GID-161	CDC Hughes	CWRS	2016	0.25889	0.30383	0.415566	0.364493	0.394182	0.326579	0.249679	0.428926	0.270071	0.357724	0.247665	0.354854	0.365907	0.27804	0.446883	0.397395	0.433527	0.270071	0.340245	0.367835	0.269086	0.269656	0.368392	0.431325	0.339618	0.355111	0.291899	0.414917	0.443064	0.267501	0.35841	0.396979	0.44889	0.371305	0.414275	0.285194	0.408425	0.29509	0.294662	0.426442	0.440219	0.441907	0.328378	0.424385	0.408491	0.431882
GID-162	PT595	CWRS		0.245009	0.306915	0.431432	0.371262	0.396667	0.342173	0.232114	0.408277	0.269043	0.345043	0.232414	0.343887	0.370877	0.131951	0.4191	0.393968	0.417712	0.232371	0.369291	0.382487	0.197884	0.290222	0.402493	0.408448	0.336045	0.347828	0.321419	0.424514	0.436981	0.164253	0.373061	0.407579	0.445463	0.38073	0.430126	0.330006	0.404432	0.332191	0.336561	0.424214	0.418791	0.418173	0.356396	0.424042	0.407977	0.44285
GID-163	PT771	CWRS		0.314412	0.325593	0.383877	0.325422	0.358453	0.361794	0.314712	0.396367	0.314969	0.32388	0.309528	0.323751	0.354683	0.300403	0.375258	0.369548	0.3922	0.291406	0.366121	0.35781	0.335147	0.312374	0.375161	0.380773	0.269843	0.258375	0.312495	0.370362	0.383515	0.326879	0.366464	0.33741	0.394225	0.327264	0.370662	0.336689	0.375875	0.318139	0.338531	0.415817	0.405721	0.402493	0.281595	0.374004	0.396667	0.387756
GID-164	PT778	CWRS		0.298603	0.299674	0.396355	0.378759	0.376232	0.276497	0.328892	0.381673	0.299417	0.382444	0.326365	0.382144	0.355754	0.345686	0.405531	0.392468	0.403965	0.288964	0.364279	0.331977	0.387627	0.344938	0.328507	0.388527	0.257404	0.265016	0.197546	0.378117	0.356482	0.356396	0.329663	0.313163	0.383558	0.128352	0.390326	0.263045	0.378881	0.201654	0.213992	0.406349	0.404564	0.410762	0.247622	0.349285	0.382144	0.388142
GID-165	PT780	CWRS		0.338045	0.314288	0.408798	0.395738	0.374731	0.312441	0.356474	0.420998	0.32172	0.393118	0.354025	0.392474	0.370994	0.377524	0.403677	0.407466	0.406638	0.331601	0.364035	0.345433	0.381605	0.33102	0.364679	0.409571	0.277495	0.247788	0.225067	0.394493	0.395266	0.37297	0.346164	0.286526	0.406263	0.176089	0.405705	0.2712	0.388925	0.229573	0.246928	0.442134	0.416849	0.416574	0.205516	0.393762	0.387319	0.401022
GID-166	Jake	CWRS	2018	0.290506	0.301088	0.407633	0.394054	0.365479	0.325722	0.351469	0.376146	0.308714	0.381116	0.354511	0.379102	0.386214	0.329192	0.41472	0.403393	0.403922	0.302973	0.38043	0.351298	0.355368	0.367604	0.374218	0.379745	0.226885	0.267372	0.271604	0.374732	0.389598	0.331248	0.361751	0.340758	0.408877	0.3073	0.399966	0.284337	0.377893	0.272299	0.284637	0.426527	0.398179	0.396239	0.30096	0.376917	0.384414	0.395296
GID-167	Rednet	CWRS	2018	0.287936	0.298089	0.429889	0.373918	0.367878	0.328121	0.31077	0.395939	0.281553	0.355839	0.312698	0.35314	0.368392	0.299117	0.440313	0.397995	0.4156	0.28181	0.382315	0.389855	0.299075	0.33534	0.364279	0.405278	0.231878	0.187002	0.235862	0.390841	0.421558	0.341359	0.348471	0.332732	0.428241	0.307472	0.412133	0.279796	0.387641	0.234856	0.245566	0.427384	0.408378	0.411404	0.28408	0.409819	0.400266	0.428627
GID-168	Ellerslie	CWRS	2018	0.296461	0.296418	0.400858	0.363936	0.35284	0.321738	0.320581	0.397267	0.31047	0.359995	0.317968	0.359352	0.360123	0.350741	0.427731	0.39144	0.420944	0.295048	0.382015	0.340288	0.366121	0.347037	0.345215	0.400951	0.185692	0.157913	0.184888	0.368006	0.383643	0.359395	0.32238	0.31063	0.394268	0.257047	0.408834	0.245223	0.379826	0.183489	0.197027	0.429483	0.403107	0.405535	0.226202	0.368649	0.380773	0.430811
GID-169	Tracker	CWRS	2018	0.316897	0.29312	0.399871	0.365436	0.356396	0.33112	0.32825	0.417017	0.323623	0.372804	0.327007	0.371048	0.345515	0.363122	0.423823	0.397138	0.442965	0.306058	0.38737	0.35841	0.380901	0.359891	0.368306	0.421558	0.178073	0.160012	0.193212	0.360338	0.369463	0.368092	0.326793	0.298442	0.390798	0.279453	0.399452	0.263516	0.400824	0.195699	0.213092	0.420187	0.422948	0.426399	0.222903	0.358752	0.381244	0.423571
GID-170	Red Bobs No. 222			0.353997	0.35087	0.42217	0.410076	0.39144	0.365736	0.378117	0.36595	0.38797	0.390541	0.373618	0.389898	0.36505	0.374861	0.381098	0.420015	0.373368	0.373233	0.372033	0.355068	0.403693	0.360191	0.352712	0.373147	0.362345	0.350056	0.308547	0.39641	0.389084	0.380687	0.349242	0.367023	0.409219	0.32992	0.379402	0.340888	0.376691	0.31514	0.302373	0.393711	0.35721	0.361366	0.356825	0.379145	0.347999	0.387585
GID-171	RL6077	CWRS		0.274698	0.307214	0.417496	0.412433	0.40425	0.336903	0.347828	0.415431	0.334719	0.411833	0.346671	0.410162	0.394482	0.29162	0.432068	0.411404	0.402327	0.243895	0.397781	0.361794	0.338617	0.155941	0.378288	0.417316	0.328728	0.372976	0.298206	0.414275	0.413375	0.258204	0.3468	0.389082	0.438994	0.355925	0.406006	0.227573	0.401812	0.307129	0.296504	0.445335	0.422091	0.424128	0.332705	0.397267	0.392426	0.412047
GID-172	Roblin	CWRS	1986	0.302373	0.295219	0.359434	0.31861	0.345729	0.308628	0.337375	0.431797	0.27337	0.327264	0.332876	0.331334	0.357467	0.349884	0.430866	0.37953	0.427968	0.28468	0.368135	0.391098	0.387028	0.314902	0.338446	0.434967	0.210658	0.20401	0.223719	0.369034	0.378845	0.365307	0.35117	0.256641	0.392211	0.243681	0.391783	0.257476	0.419504	0.231214	0.247665	0.442421	0.444847	0.444778	0.143432	0.362908	0.392683	0.374432
GID-173	SAAR			0.412989	0.411833	0.330875	0.409862	0.382744	0.419758	0.428455	0.333947	0.427427	0.422543	0.425156	0.4231	0.408877	0.40455	0.307111	0.373961	0.34708	0.415603	0.382529	0.361709	0.420872	0.395797	0.35841	0.339345	0.393896	0.385914	0.410409	0.363808	0.322552	0.41526	0.385528	0.413115	0.326322	0.393797	0.332919	0.422929	0.34968	0.415774	0.420915	0.385957	0.36231	0.358838	0.429183	0.306529	0.360123	0.365436
GID-174	Sadash	CWSWS	2007	0.428155	0.421943	0.407118	0.454674	0.408705	0.395425	0.423057	0.169094	0.439937	0.439251	0.4225	0.441093	0.411876	0.414489	0.281518	0.406349	0.25292	0.438737	0.388099	0.385186	0.431497	0.422704	0.398938	0.18983	0.427514	0.40425	0.412641	0.418045	0.374989	0.421343	0.402236	0.440925	0.382015	0.402108	0.364365	0.424385	0.212136	0.421343	0.408748	0.314326	0.180866	0.178991	0.429698	0.369763	0.357039	0.390626
GID-175	Shaw	CWRS	2009	0.253406	0.310599	0.377616	0.336475	0.377046	0.338232	0.290464	0.434753	0.286008	0.337503	0.289478	0.336775	0.383815	0.306315	0.444693	0.38917	0.420642	0.240768	0.379573	0.390198	0.320752	0.309632	0.356825	0.435181	0.290849	0.293934	0.283146	0.378502	0.413418	0.249079	0.355239	0.336595	0.41616	0.307043	0.418473	0.300703	0.419719	0.290035	0.293891	0.460543	0.436533	0.436938	0.275084	0.401165	0.406863	0.411747
GID-176	Sinton	CWRS	1975	0.287293	0.289307	0.413122	0.374047	0.371519	0.294491	0.315354	0.403265	0.271314	0.371648	0.313512	0.372462	0.385742	0.343972	0.423566	0.38827	0.387158	0.335318	0.386985	0.377902	0.360038	0.327628	0.34967	0.40712	0.305226	0.296033	0.197202	0.393454	0.432739	0.324008	0.331548	0.304107	0.447305	0.259447	0.448933	0.272128	0.399536	0.199083	0.212364	0.433339	0.390379	0.395339	0.260303	0.41963	0.406992	0.419244
GID-177	Snowbird	CWHWS	2004	0.21442	0.246508	0.403559	0.363122	0.370962	0.286308	0.29749	0.406735	0.303059	0.348128	0.29599	0.351598	0.349027	0.219004	0.413131	0.403564	0.42103	0.211636	0.33836	0.360809	0.293762	0.198059	0.386128	0.410933	0.283531	0.317068	0.267614	0.399751	0.409905	0.115928	0.322937	0.358182	0.417531	0.346286	0.388484	0.204224	0.394126	0.272642	0.267415	0.432439	0.421577	0.420401	0.284851	0.394568	0.343629	0.412261
GID-178	Snowhite475	CPSW	2006	0.402279	0.351855	0.323928	0.401294	0.374689	0.37349	0.424428	0.353997	0.433767	0.391954	0.423871	0.389855	0.301859	0.393411	0.366712	0.334719	0.39694	0.401465	0.257519	0.348685	0.440751	0.395454	0.340159	0.36505	0.360666	0.366121	0.384407	0.386342	0.225559	0.403007	0.394354	0.376894	0.225473	0.353012	0.150073	0.363551	0.337484	0.394953	0.378588	0.363079	0.371609	0.373918	0.3848	0.215106	0.137606	0.236998
GID-179	Snowhite476	CPSW	2006	0.394225	0.374218	0.263808	0.36822	0.355925	0.407591	0.435138	0.367963	0.421429	0.354254	0.438266	0.353526	0.298689	0.401294	0.336568	0.27654	0.388408	0.385357	0.25709	0.331206	0.427041	0.375402	0.369034	0.369934	0.369447	0.366207	0.386252	0.368777	0.210565	0.393068	0.361194	0.369297	0.164296	0.382401	0.166438	0.36415	0.330871	0.392897	0.382272	0.3474	0.367924	0.36852	0.367492	0.211079	0.224402	0.240339
GID-180	Snowstar	CWHWS	2009	0.272385	0.303444	0.412693	0.407806	0.400137	0.336047	0.350056	0.414318	0.332148	0.411147	0.3465	0.414703	0.39234	0.290249	0.43181	0.414746	0.403189	0.248522	0.403093	0.363251	0.343672	0.157312	0.371176	0.415603	0.323907	0.368349	0.296662	0.415046	0.406692	0.253063	0.341316	0.38479	0.436252	0.350613	0.401122	0.224659	0.401039	0.302588	0.292991	0.443278	0.422006	0.41993	0.32825	0.392811	0.388313	0.413332
GID-181	Somerset	CWRS	2005	0.270157	0.243724	0.400686	0.358024	0.372205	0.278896	0.285537	0.416802	0.14159	0.364793	0.28498	0.368777	0.350698	0.31981	0.437994	0.435567	0.401767	0.303959	0.396924	0.342773	0.34907	0.306161	0.292948	0.419973	0.235064	0.229715	0.110272	0.404507	0.418088	0.314755	0.267715	0.30591	0.434024	0.217976	0.410033	0.195442	0.396187	0.0964356	0.11203	0.44602	0.416735	0.417702	0.204267	0.403265	0.392511	0.445892
GID-182	Springfield	CWSWS	1972	0.437923	0.422372	0.442667	0.446877	0.368006	0.434753	0.420315	0.327007	0.434282	0.441479	0.421129	0.443064	0.414789	0.436852	0.369804	0.426913	0.380521	0.434881	0.427598	0.385528	0.432354	0.436244	0.411533	0.334804	0.452695	0.443064	0.42577	0.392854	0.426313	0.423229	0.444563	0.475688	0.436938	0.435867	0.405749	0.447691	0.35011	0.426827	0.437795	0.303187	0.362224	0.351298	0.458144	0.415774	0.398509	0.418387
GID-183	Stettler	CWRS	2008	0.260518	0.317025	0.412822	0.384286	0.372076	0.328892	0.234513	0.41059	0.298004	0.367235	0.232928	0.371219	0.380387	0.192443	0.41326	0.414617	0.399483	0.248222	0.374432	0.378631	0.190087	0.305947	0.378245	0.409391	0.293001	0.310984	0.282803	0.403693	0.425499	0.198355	0.35464	0.383202	0.429955	0.341916	0.402793	0.280224	0.396487	0.289435	0.289435	0.431154	0.411806	0.40712	0.322209	0.411276	0.387242	0.432739
GID-184	Sumai 3			0.444735	0.420787	0.415523	0.459429	0.387842	0.417659	0.436895	0.402965	0.434667	0.458315	0.438137	0.460757	0.383643	0.43124	0.381484	0.407163	0.34234	0.463885	0.388913	0.342044	0.43154	0.431102	0.415346	0.405364	0.427987	0.412604	0.421479	0.404721	0.389084	0.438866	0.418559	0.443329	0.376146	0.439337	0.396881	0.406435	0.389702	0.423357	0.431668	0.407677	0.406964	0.407206	0.450133	0.394396	0.368992	0.413461
GID-185	Superb	CWRS	2001	0.239954	0.297661	0.434691	0.368606	0.394525	0.336518	0.225002	0.409562	0.261846	0.346928	0.222732	0.349884	0.380302	0.119099	0.426658	0.400137	0.421418	0.23417	0.381373	0.394396	0.191115	0.286066	0.406863	0.410419	0.33484	0.348685	0.320132	0.427341	0.442893	0.146003	0.370148	0.409811	0.450004	0.37379	0.427298	0.32675	0.40864	0.330906	0.33519	0.426099	0.422863	0.418345	0.355539	0.429869	0.408834	0.450304
GID-186	SWS52	CWSWS	1905	0.385657	0.380302	0.389623	0.422629	0.385742	0.406306	0.405835	0.322723	0.416031	0.434024	0.404935	0.436038	0.377174	0.383643	0.363707	0.407377	0.377936	0.393411	0.366678	0.373276	0.415988	0.397168	0.381887	0.325122	0.40569	0.381801	0.384922	0.40682	0.386813	0.388013	0.396067	0.434531	0.383129	0.390284	0.36068	0.385657	0.29875	0.388699	0.397867	0.342601	0.340026	0.336903	0.408277	0.378502	0.350784	0.410076
GID-187	SY087	CWSP	2014	0.28151	0.326536	0.447213	0.367406	0.399409	0.346714	0.240596	0.425071	0.25302	0.342044	0.245523	0.341744	0.372676	0.170337	0.43619	0.40485	0.422624	0.242396	0.358581	0.390198	0.202853	0.308389	0.399409	0.426185	0.342846	0.342773	0.318673	0.444135	0.456602	0.229372	0.375289	0.412772	0.460972	0.383129	0.437495	0.321609	0.414867	0.330563	0.335361	0.434838	0.426934	0.425114	0.368392	0.443578	0.413803	0.443792
GID-188	SY 433	CWRS	2012	0.251264	0.263559	0.392839	0.342216	0.367621	0.287079	0.311884	0.423014	0.290035	0.336304	0.309185	0.338831	0.343115	0.232285	0.424811	0.398595	0.419651	0.220461	0.335875	0.368263	0.315526	0.235893	0.380045	0.426699	0.285684	0.318439	0.258946	0.401294	0.409905	0.146431	0.321823	0.372945	0.422415	0.351941	0.397738	0.198483	0.406235	0.26553	0.260903	0.428755	0.43379	0.432911	0.29222	0.394054	0.356739	0.418173
GID-189	SY479 VB	CWRS	2016	0.287422	0.328849	0.406561	0.351469	0.386214	0.345772	0.278297	0.431497	0.293719	0.331334	0.278597	0.335318	0.384243	0.310856	0.446367	0.405278	0.420556	0.296804	0.375375	0.377603	0.253577	0.300077	0.384072	0.430983	0.329847	0.328978	0.303913	0.403436	0.459087	0.310171	0.380173	0.380585	0.468683	0.336175	0.448291	0.281852	0.421523	0.309228	0.307257	0.442893	0.440304	0.437709	0.294791	0.448633	0.420744	0.40515
GID-190	SY637	CWRS	2016	0.295625	0.328038	0.367195	0.309707	0.306315	0.346799	0.349118	0.382862	0.336238	0.314215	0.347272	0.317864	0.334822	0.341776	0.417789	0.374576	0.423216	0.288456	0.362641	0.374104	0.371528	0.320588	0.386125	0.397802	0.224259	0.254282	0.307907	0.323702	0.36775	0.32323	0.379685	0.335541	0.381145	0.324518	0.365818	0.316748	0.384543	0.310265	0.329756	0.409737	0.417912	0.411282	0.271412	0.359936	0.369854	0.384193
GID-191	SY985	CPSR	2011	0.374342	0.379562	0.290155	0.200198	0.247347	0.386248	0.38793	0.408291	0.378397	0.22759	0.385644	0.231041	0.27159	0.406565	0.401202	0.34997	0.413278	0.375248	0.34846	0.39384	0.426452	0.373981	0.411742	0.413899	0.344487	0.349582	0.375054	0.28108	0.338927	0.377319	0.389483	0.352275	0.366707	0.376068	0.357907	0.381589	0.404895	0.378872	0.375162	0.415193	0.406106	0.403114	0.334225	0.33884	0.349754	0.351048
GID-192	SY995	CPSR	2014	0.331463	0.355497	0.25253	0.186616	0.323837	0.362994	0.360637	0.412818	0.350099	0.213092	0.361023	0.211593	0.260432	0.360637	0.391618	0.314455	0.415945	0.341445	0.339217	0.369206	0.39264	0.326428	0.383815	0.415903	0.328383	0.348942	0.357419	0.354168	0.298089	0.343244	0.372119	0.357152	0.327136	0.35811	0.324051	0.35314	0.377292	0.366378	0.375546	0.393797	0.419092	0.420829	0.315012	0.298946	0.34123	0.335832
GID-193	Unity	CNHR	2007	0.279967	0.311199	0.382461	0.352498	0.352969	0.310128	0.307429	0.405449	0.293891	0.363122	0.302245	0.366849	0.361537	0.340673	0.43297	0.402622	0.396725	0.294062	0.386685	0.342987	0.350484	0.260058	0.335747	0.411276	0.317407	0.346885	0.255084	0.382701	0.41239	0.308971	0.33519	0.375563	0.431325	0.327093	0.418387	0.23824	0.394727	0.255419	0.250193	0.451547	0.407821	0.406349	0.29659	0.394311	0.385443	0.441308
GID-194	Vesper	CNHR	2010	0.245009	0.294319	0.402616	0.368092	0.38013	0.314069	0.263045	0.418387	0.273498	0.351469	0.258975	0.355025	0.360338	0.248908	0.42275	0.410333	0.403448	0.271185	0.37666	0.358495	0.263088	0.319572	0.375418	0.417959	0.18806	0.234213	0.241354	0.388184	0.414617	0.254306	0.35721	0.347496	0.425756	0.310042	0.408791	0.262231	0.404603	0.244623	0.254049	0.442036	0.42312	0.418687	0.28091	0.401765	0.387156	0.432054
GID-195	Waskada	CWRS	2007	0.240511	0.298132	0.424271	0.363079	0.393368	0.322594	0.253149	0.417059	0.27337	0.343629	0.250536	0.347785	0.364665	0.184089	0.435804	0.398124	0.414566	0.215363	0.390755	0.377988	0.21849	0.274498	0.409991	0.418773	0.336949	0.356096	0.321205	0.417359	0.437966	0.119227	0.361194	0.413888	0.444735	0.383515	0.423743	0.321395	0.407652	0.329749	0.334719	0.427341	0.423163	0.419159	0.36098	0.426741	0.408191	0.443749
GID-196	Whitehawk	CWHWS	2012	0.239311	0.27714	0.391938	0.35117	0.391397	0.314026	0.347742	0.405921	0.318096	0.336261	0.346414	0.339474	0.351469	0.266001	0.413174	0.388613	0.424262	0.241753	0.35871	0.371905	0.332962	0.162153	0.388998	0.412433	0.297004	0.325593	0.290826	0.410505	0.407035	0.197712	0.351769	0.380799	0.414403	0.353612	0.39324	0.217205	0.393395	0.297618	0.289992	0.419973	0.421534	0.421215	0.287636	0.394953	0.359267	0.400823
GID-197	Wildcat	CWES	1987	0.393582	0.407849	0.339451	0.380002	0.303273	0.432054	0.429955	0.400394	0.402022	0.366892	0.43034	0.367278	0.39324	0.425242	0.416695	0.359952	0.395647	0.407163	0.383943	0.402536	0.46547	0.413407	0.40455	0.40365	0.363679	0.361023	0.391401	0.180319	0.310342	0.406392	0.414874	0.343977	0.32585	0.358881	0.331334	0.403522	0.388887	0.393111	0.38797	0.414703	0.381294	0.382272	0.373019	0.300146	0.381158	0.331805
GID-198	WR859 CL	CWRS	2009	0.264076	0.161539	0.388789	0.345188	0.373554	0.311381	0.289828	0.427457	0.259919	0.352387	0.289185	0.356286	0.334947	0.323678	0.418528	0.398663	0.41731	0.283829	0.371754	0.356243	0.351315	0.315427	0.337004	0.431314	0.19709	0.201088	0.203459	0.376553	0.404833	0.304782	0.320507	0.289393	0.417517	0.286786	0.396221	0.237767	0.409956	0.192819	0.210129	0.435341	0.432193	0.432471	0.232111	0.395835	0.368669	0.413746
	Min	0.0103676
	Max	0.490661
	Mean	0.349242
		Frequency (%)	No. of pairs
	< 0.050	0.225013	43
	0.051-0.100	0.282575	54
	0.101-0.200	3.24961	621
	0.201-0.310	18.6447	3563
	0.301-0.400	50.293	9611
	>0.400	27.3051	5218
	Total	100	19110
	Expected	19110
	Difference	0
[truncated: 150 more columns]
