# Supplementary material for: Identification of Disease Resistance Parents and Genome-Wide Association Mapping of Resistance in Spring Wheat
Source: Plants (Basel). 2022 Oct 28;11(21):2905. doi: 10.3390/plants11212905 (PMC9658635; doi:10.3390/plants11212905)
Supplement: Supplementary file 1 [file plants-11-02905-s001.zip › Table S5 RLPSI summary R1.xlsx]

## Sheet: Table S5A-3125 weights
Table S5. Summary of the the Kempthorne and Nordskog Restrictive Linear Phenotypic Selection Index (RLPSI) based on five phenotypic traits and 3,125 combinations of economic weights.
A) Summary of expected genetic gain (EGG) per trait, disease score (DS), grain yield (Yield),restricted linear phenotypic selection index (RLPSI), response to selection (RS), and correlation between the the RLPSI and net genetic merit (CGM) based on 3,125 economic weights. Acronyms: Yr - stripe rust; Lr - leaf rust; Ls - leaf spot; Cb - common bunt; Yld -grain yield.
Yr weights	Lr weights	Ls weights	Cb weights	Yld weights	Economic weights for all 5 traits	EGG.Yr	EGG.Lr	EGG.Ls	EGG.Cb	EGG.Yield	RS	CGM	DS.Yr	DS.Lr	DS.Ls	DS.Cb	Yield	Index	Selected weights	Comment
-1	-1	-1	-1	1	Wt(-1,-1,-1,-1,1)	-0.54881	-0.657833	-0.645079	-0.501651	0	2.35337	0.607323	1.915	1.35	3.16	1.495	4.84	-5.27983
-1	-1	-1	-1	3	Wt(-1,-1,-1,-1,3)	-0.54881	-0.657833	-0.645079	-0.501651	0	2.35337	0.425145	1.915	1.35	3.16	1.495	4.84	-5.27983
-1	-1	-1	-1	5	Wt(-1,-1,-1,-1,5)	-0.54881	-0.657833	-0.645079	-0.501651	-7.26513e-17	2.35337	0.307984	1.915	1.35	3.16	1.495	4.84	-5.27983
-1	-1	-1	-1	7	Wt(-1,-1,-1,-1,7)	-0.54881	-0.657833	-0.645079	-0.501651	-3.63257e-17	2.35337	0.237416	1.915	1.35	3.16	1.495	4.84	-5.27983
-1	-1	-1	-1	9	Wt(-1,-1,-1,-1,9)	-0.54881	-0.657833	-0.645079	-0.501651	-3.63257e-17	2.35337	0.191995	1.915	1.35	3.16	1.495	4.84	-5.27983
-1	-1	-1	-3	1	Wt(-1,-1,-1,-3,1)	-0.362858	-0.495433	-0.579121	-0.73369	-1.17477e-17	3.63848	0.661217	2.13	1.57	3.23	1.215	4.77	-6.37261
-1	-1	-1	-3	3	Wt(-1,-1,-1,-3,3)	-0.362858	-0.495433	-0.579121	-0.73369	-1.17477e-17	3.63848	0.539971	2.13	1.57	3.23	1.215	4.77	-6.37261
-1	-1	-1	-3	5	Wt(-1,-1,-1,-3,5)	-0.362858	-0.495433	-0.579121	-0.73369	-2.34955e-17	3.63848	0.426875	2.13	1.57	3.23	1.215	4.77	-6.37261
-1	-1	-1	-3	7	Wt(-1,-1,-1,-3,7)	-0.362858	-0.495433	-0.579121	-0.73369	0	3.63848	0.343777	2.13	1.57	3.23	1.215	4.77	-6.37261
-1	-1	-1	-3	9	Wt(-1,-1,-1,-3,9)	-0.362858	-0.495433	-0.579121	-0.73369	-2.34955e-17	3.63848	0.284546	2.13	1.57	3.23	1.215	4.77	-6.37261
-1	-1	-1	-5	1	Wt(-1,-1,-1,-5,1)	-0.260114	-0.396669	-0.519886	-0.801865	8.24219e-18	5.18599	0.682907	2.175	1.815	3.31	1.135	4.7	-7.34556
-1	-1	-1	-5	3	Wt(-1,-1,-1,-5,3)	-0.260114	-0.396669	-0.519886	-0.801865	-1.64844e-17	5.18599	0.609937	2.175	1.815	3.31	1.135	4.7	-7.34556
-1	-1	-1	-5	5	Wt(-1,-1,-1,-5,5)	-0.260114	-0.396669	-0.519886	-0.801865	-1.64844e-17	5.18599	0.521113	2.175	1.815	3.31	1.135	4.7	-7.34556
-1	-1	-1	-5	7	Wt(-1,-1,-1,-5,7)	-0.260114	-0.396669	-0.519886	-0.801865	-8.24219e-18	5.18599	0.441615	2.175	1.815	3.31	1.135	4.7	-7.34556
-1	-1	-1	-5	9	Wt(-1,-1,-1,-5,9)	-0.260114	-0.396669	-0.519886	-0.801865	-4.1211e-17	5.18599	0.377334	2.175	1.815	3.31	1.135	4.7	-7.34556
-1	-1	-1	-7	1	Wt(-1,-1,-1,-7,1)	-0.202014	-0.338969	-0.481723	-0.828121	-1.88036e-17	6.81955	0.691771	2.35	1.8	3.315	1.11	4.68	-8.26286
-1	-1	-1	-7	3	Wt(-1,-1,-1,-7,3)	-0.202014	-0.338969	-0.481723	-0.828121	0	6.81955	0.646395	2.35	1.8	3.315	1.11	4.68	-8.26286
-1	-1	-1	-7	5	Wt(-1,-1,-1,-7,5)	-0.202014	-0.338969	-0.481723	-0.828121	0	6.81955	0.581469	2.35	1.8	3.315	1.11	4.68	-8.26286
-1	-1	-1	-7	7	Wt(-1,-1,-1,-7,7)	-0.202014	-0.338969	-0.481723	-0.828121	-6.26785e-18	6.81955	0.514168	2.35	1.8	3.315	1.11	4.68	-8.26286
-1	-1	-1	-7	9	Wt(-1,-1,-1,-7,9)	-0.202014	-0.338969	-0.481723	-0.828121	-1.88036e-17	6.81955	0.453228	2.35	1.8	3.315	1.11	4.68	-8.26286
-1	-1	-1	-9	1	Wt(-1,-1,-1,-9,1)	-0.165654	-0.302264	-0.456338	-0.840597	-1.51045e-17	8.48963	0.695917	2.39	1.86	3.325	1.095	4.695	-9.15424
-1	-1	-1	-9	3	Wt(-1,-1,-1,-9,3)	-0.165654	-0.302264	-0.456338	-0.840597	-2.51742e-18	8.48963	0.6661	2.39	1.86	3.325	1.095	4.695	-9.15424
-1	-1	-1	-9	5	Wt(-1,-1,-1,-9,5)	-0.165654	-0.302264	-0.456338	-0.840597	5.03484e-18	8.48963	0.618865	2.39	1.86	3.325	1.095	4.695	-9.15424
-1	-1	-1	-9	7	Wt(-1,-1,-1,-9,7)	-0.165654	-0.302264	-0.456338	-0.840597	7.55226e-18	8.48963	0.56466	2.39	1.86	3.325	1.095	4.695	-9.15424
-1	-1	-1	-9	9	Wt(-1,-1,-1,-9,9)	-0.165654	-0.302264	-0.456338	-0.840597	-5.03484e-18	8.48963	0.510983	2.39	1.86	3.325	1.095	4.695	-9.15424
-1	-1	-3	-1	1	Wt(-1,-1,-3,-1,1)	-0.442745	-0.566788	-0.777734	-0.464762	0	3.8075	0.642006	1.995	1.665	2.95	1.555	4.77	-9.15045
-1	-1	-3	-1	3	Wt(-1,-1,-3,-1,3)	-0.442745	-0.566788	-0.777734	-0.464762	-2.24525e-17	3.8075	0.522862	1.995	1.665	2.95	1.555	4.77	-9.15045
-1	-1	-3	-1	5	Wt(-1,-1,-3,-1,5)	-0.442745	-0.566788	-0.777734	-0.464762	-2.24525e-17	3.8075	0.417915	1.995	1.665	2.95	1.555	4.77	-9.15045
-1	-1	-3	-1	7	Wt(-1,-1,-3,-1,7)	-0.442745	-0.566788	-0.777734	-0.464762	-2.24525e-17	3.8075	0.340413	1.995	1.665	2.95	1.555	4.77	-9.15045
-1	-1	-3	-1	9	Wt(-1,-1,-3,-1,9)	-0.442745	-0.566788	-0.777734	-0.464762	-6.73575e-17	3.8075	0.28433	1.995	1.665	2.95	1.555	4.77	-9.15045
-1	-1	-3	-3	1	Wt(-1,-1,-3,-3,1)	-0.345995	-0.486878	-0.716476	-0.657607	0	4.95512	0.667344	2.055	1.77	3.015	1.305	4.77	-10.2951
-1	-1	-3	-3	3	Wt(-1,-1,-3,-3,3)	-0.345995	-0.486878	-0.716476	-0.657607	3.45048e-17	4.95512	0.582001	2.055	1.77	3.015	1.305	4.77	-10.2951
-1	-1	-3	-3	5	Wt(-1,-1,-3,-3,5)	-0.345995	-0.486878	-0.716476	-0.657607	0	4.95512	0.490719	2.055	1.77	3.015	1.305	4.77	-10.2951
-1	-1	-3	-3	7	Wt(-1,-1,-3,-3,7)	-0.345995	-0.486878	-0.716476	-0.657607	-5.17573e-17	4.95512	0.413559	2.055	1.77	3.015	1.305	4.77	-10.2951
-1	-1	-3	-3	9	Wt(-1,-1,-3,-3,9)	-0.345995	-0.486878	-0.716476	-0.657607	0	4.95512	0.352789	2.055	1.77	3.015	1.305	4.77	-10.2951
-1	-1	-3	-5	1	Wt(-1,-1,-3,-5,1)	-0.273688	-0.418747	-0.649895	-0.745393	-2.68446e-17	6.36908	0.681985	2.235	1.88	3.12	1.165	4.745	-11.3292
-1	-1	-3	-5	3	Wt(-1,-1,-3,-5,3)	-0.273688	-0.418747	-0.649895	-0.745393	-1.34223e-17	6.36908	0.624326	2.235	1.88	3.12	1.165	4.745	-11.3292
-1	-1	-3	-5	5	Wt(-1,-1,-3,-5,5)	-0.273688	-0.418747	-0.649895	-0.745393	0	6.36908	0.552174	2.235	1.88	3.12	1.165	4.745	-11.3292
-1	-1	-3	-5	7	Wt(-1,-1,-3,-5,7)	-0.273688	-0.418747	-0.649895	-0.745393	-2.68446e-17	6.36908	0.482642	2.235	1.88	3.12	1.165	4.745	-11.3292
-1	-1	-3	-5	9	Wt(-1,-1,-3,-5,9)	-0.273688	-0.418747	-0.649895	-0.745393	-1.34223e-17	6.36908	0.422397	2.235	1.88	3.12	1.165	4.745	-11.3292
-1	-1	-3	-7	1	Wt(-1,-1,-3,-7,1)	-0.224063	-0.36945	-0.597923	-0.788643	-1.08106e-17	7.90778	0.689782	2.38	1.9	3.17	1.125	4.68	-12.2773
-1	-1	-3	-7	3	Wt(-1,-1,-3,-7,3)	-0.224063	-0.36945	-0.597923	-0.788643	0	7.90778	0.650499	2.38	1.9	3.17	1.125	4.68	-12.2773
-1	-1	-3	-7	5	Wt(-1,-1,-3,-7,5)	-0.224063	-0.36945	-0.597923	-0.788643	1.08106e-17	7.90778	0.595642	2.38	1.9	3.17	1.125	4.68	-12.2773
-1	-1	-3	-7	7	Wt(-1,-1,-3,-7,7)	-0.224063	-0.36945	-0.597923	-0.788643	-1.08106e-17	7.90778	0.537002	2.38	1.9	3.17	1.125	4.68	-12.2773
-1	-1	-3	-7	9	Wt(-1,-1,-3,-7,9)	-0.224063	-0.36945	-0.597923	-0.788643	-1.08106e-17	7.90778	0.48164	2.38	1.9	3.17	1.125	4.68	-12.2773
-1	-1	-3	-9	1	Wt(-1,-1,-3,-9,1)	-0.189314	-0.333937	-0.559071	-0.812267	-8.98844e-18	9.51087	0.694091	2.38	1.9	3.17	1.125	4.68	-13.1938
-1	-1	-3	-9	3	Wt(-1,-1,-3,-9,3)	-0.189314	-0.333937	-0.559071	-0.812267	-1.79769e-17	9.51087	0.666526	2.38	1.9	3.17	1.125	4.68	-13.1938
-1	-1	-3	-9	5	Wt(-1,-1,-3,-9,5)	-0.189314	-0.333937	-0.559071	-0.812267	-8.98844e-18	9.51087	0.624976	2.38	1.9	3.17	1.125	4.68	-13.1938
-1	-1	-3	-9	7	Wt(-1,-1,-3,-9,7)	-0.189314	-0.333937	-0.559071	-0.812267	-8.98844e-18	9.51087	0.57702	2.38	1.9	3.17	1.125	4.68	-13.1938
-1	-1	-3	-9	9	Wt(-1,-1,-3,-9,9)	-0.189314	-0.333937	-0.559071	-0.812267	-8.98844e-18	9.51087	0.528466	2.38	1.9	3.17	1.125	4.68	-13.1938
-1	-1	-5	-1	1	Wt(-1,-1,-5,-1,1)	-0.384726	-0.511987	-0.814665	-0.436266	-3.16253e-17	5.4063	0.658219	2.1	1.875	2.87	1.57	4.74	-12.8665
-1	-1	-5	-1	3	Wt(-1,-1,-5,-1,3)	-0.384726	-0.511987	-0.814665	-0.436266	-3.16253e-17	5.4063	0.577802	2.1	1.875	2.87	1.57	4.74	-12.8665
-1	-1	-5	-1	5	Wt(-1,-1,-5,-1,5)	-0.384726	-0.511987	-0.814665	-0.436266	-3.16253e-17	5.4063	0.494032	2.1	1.875	2.87	1.57	4.74	-12.8665
-1	-1	-5	-1	7	Wt(-1,-1,-5,-1,7)	-0.384726	-0.511987	-0.814665	-0.436266	-6.32505e-17	5.4063	0.422056	2.1	1.875	2.87	1.57	4.74	-12.8665
-1	-1	-5	-1	9	Wt(-1,-1,-5,-1,9)	-0.384726	-0.511987	-0.814665	-0.436266	-3.16253e-17	5.4063	0.364054	2.1	1.875	2.87	1.57	4.74	-12.8665
-1	-1	-5	-3	1	Wt(-1,-1,-5,-3,1)	-0.326773	-0.468385	-0.773808	-0.596245	-2.64958e-17	6.45293	0.672332	2.16	1.98	2.935	1.32	4.74	-14.0914
-1	-1	-5	-3	3	Wt(-1,-1,-5,-3,3)	-0.326773	-0.468385	-0.773808	-0.596245	-5.29916e-17	6.45293	0.610555	2.16	1.98	2.935	1.32	4.74	-14.0914
-1	-1	-5	-3	5	Wt(-1,-1,-5,-3,5)	-0.326773	-0.468385	-0.773808	-0.596245	-2.64958e-17	6.45293	0.538852	2.16	1.98	2.935	1.32	4.74	-14.0914
-1	-1	-5	-3	7	Wt(-1,-1,-5,-3,7)	-0.326773	-0.468385	-0.773808	-0.596245	-2.64958e-17	6.45293	0.471589	2.16	1.98	2.935	1.32	4.74	-14.0914
-1	-1	-5	-3	9	Wt(-1,-1,-5,-3,9)	-0.326773	-0.468385	-0.773808	-0.596245	-2.64958e-17	6.45293	0.4138	2.16	1.98	2.935	1.32	4.74	-14.0914
-1	-1	-5	-5	1	Wt(-1,-1,-5,-5,1)	-0.27591	-0.423023	-0.720627	-0.688888	0	7.74651	0.682307	2.185	1.945	2.99	1.255	4.73	-15.1621
-1	-1	-5	-5	3	Wt(-1,-1,-5,-5,3)	-0.27591	-0.423023	-0.720627	-0.688888	0	7.74651	0.636795	2.185	1.945	2.99	1.255	4.73	-15.1621
-1	-1	-5	-5	5	Wt(-1,-1,-5,-5,5)	-0.27591	-0.423023	-0.720627	-0.688888	0	7.74651	0.578698	2.185	1.945	2.99	1.255	4.73	-15.1621
-1	-1	-5	-5	7	Wt(-1,-1,-5,-5,7)	-0.27591	-0.423023	-0.720627	-0.688888	-2.20713e-17	7.74651	0.519311	2.185	1.945	2.99	1.255	4.73	-15.1621
-1	-1	-5	-5	9	Wt(-1,-1,-5,-5,9)	-0.27591	-0.423023	-0.720627	-0.688888	-4.41427e-17	7.74651	0.464637	2.185	1.945	2.99	1.255	4.73	-15.1621
-1	-1	-5	-7	1	Wt(-1,-1,-5,-7,1)	-0.235868	-0.384553	-0.672022	-0.743247	-1.86182e-17	9.18326	0.688691	2.235	1.955	2.995	1.24	4.73	-16.1947
-1	-1	-5	-7	3	Wt(-1,-1,-5,-7,3)	-0.235868	-0.384553	-0.672022	-0.743247	-3.72364e-17	9.18326	0.655299	2.235	1.955	2.995	1.24	4.73	-16.1947
-1	-1	-5	-7	5	Wt(-1,-1,-5,-7,5)	-0.235868	-0.384553	-0.672022	-0.743247	-1.86182e-17	9.18326	0.609391	2.235	1.955	2.995	1.24	4.73	-16.1947
-1	-1	-5	-7	7	Wt(-1,-1,-5,-7,7)	-0.235868	-0.384553	-0.672022	-0.743247	1.86182e-17	9.18326	0.558962	2.235	1.955	2.995	1.24	4.73	-16.1947
-1	-1	-5	-7	9	Wt(-1,-1,-5,-7,9)	-0.235868	-0.384553	-0.672022	-0.743247	0	9.18326	0.509503	2.235	1.955	2.995	1.24	4.73	-16.1947
-1	-1	-5	-9	1	Wt(-1,-1,-5,-9,1)	-0.205006	-0.353639	-0.631473	-0.776631	-1.59705e-17	10.7057	0.692731	2.225	2.015	3.13	1.15	4.68	-17.1569
-1	-1	-5	-9	3	Wt(-1,-1,-5,-9,3)	-0.205006	-0.353639	-0.631473	-0.776631	-3.19411e-17	10.7057	0.66791	2.225	2.015	3.13	1.15	4.68	-17.1569
-1	-1	-5	-9	5	Wt(-1,-1,-5,-9,5)	-0.205006	-0.353639	-0.631473	-0.776631	-7.98527e-18	10.7057	0.631805	2.225	2.015	3.13	1.15	4.68	-17.1569
-1	-1	-5	-9	7	Wt(-1,-1,-5,-9,7)	-0.205006	-0.353639	-0.631473	-0.776631	-7.98527e-18	10.7057	0.589826	2.225	2.015	3.13	1.15	4.68	-17.1569
-1	-1	-5	-9	9	Wt(-1,-1,-5,-9,9)	-0.205006	-0.353639	-0.631473	-0.776631	-1.59705e-17	10.7057	0.546401	2.225	2.015	3.13	1.15	4.68	-17.1569
-1	-1	-7	-1	1	Wt(-1,-1,-7,-1,1)	-0.350839	-0.478991	-0.82918	-0.417976	-2.42448e-17	7.05207	0.6667	2.08	1.84	2.86	1.66	4.755	-16.5467
-1	-1	-7	-1	3	Wt(-1,-1,-7,-1,3)	-0.350839	-0.478991	-0.82918	-0.417976	0	7.05207	0.608752	2.08	1.84	2.86	1.66	4.755	-16.5467
-1	-1	-7	-1	5	Wt(-1,-1,-7,-1,5)	-0.350839	-0.478991	-0.82918	-0.417976	-2.42448e-17	7.05207	0.543051	2.08	1.84	2.86	1.66	4.755	-16.5467
-1	-1	-7	-1	7	Wt(-1,-1,-7,-1,7)	-0.350839	-0.478991	-0.82918	-0.417976	-4.84895e-17	7.05207	0.48073	2.08	1.84	2.86	1.66	4.755	-16.5467
-1	-1	-7	-1	9	Wt(-1,-1,-7,-1,9)	-0.350839	-0.478991	-0.82918	-0.417976	-2.42448e-17	7.05207	0.42613	2.08	1.84	2.86	1.66	4.755	-16.5467
-1	-1	-7	-3	1	Wt(-1,-1,-7,-3,1)	-0.31164	-0.452283	-0.801431	-0.552414	0	8.03118	0.675779	2.13	1.99	2.91	1.395	4.715	-17.8357
-1	-1	-7	-3	3	Wt(-1,-1,-7,-3,3)	-0.31164	-0.452283	-0.801431	-0.552414	-2.1289e-17	8.03118	0.628951	2.13	1.99	2.91	1.395	4.715	-17.8357
-1	-1	-7	-3	5	Wt(-1,-1,-7,-3,5)	-0.31164	-0.452283	-0.801431	-0.552414	0	8.03118	0.572217	2.13	1.99	2.91	1.395	4.715	-17.8357
-1	-1	-7	-3	7	Wt(-1,-1,-7,-3,7)	-0.31164	-0.452283	-0.801431	-0.552414	-2.1289e-17	8.03118	0.515154	2.13	1.99	2.91	1.395	4.715	-17.8357
-1	-1	-7	-3	9	Wt(-1,-1,-7,-3,9)	-0.31164	-0.452283	-0.801431	-0.552414	-2.1289e-17	8.03118	0.462739	2.13	1.99	2.91	1.395	4.715	-17.8357
-1	-1	-7	-5	1	Wt(-1,-1,-7,-5,1)	-0.274222	-0.421036	-0.761015	-0.641864	0	9.23168	0.682958	2.365	2.08	2.91	1.295	4.72	-18.9346
-1	-1	-7	-5	3	Wt(-1,-1,-7,-5,3)	-0.274222	-0.421036	-0.761015	-0.641864	0	9.23168	0.646303	2.365	2.08	2.91	1.295	4.72	-18.9346
-1	-1	-7	-5	5	Wt(-1,-1,-7,-5,5)	-0.274222	-0.421036	-0.761015	-0.641864	-1.85205e-17	9.23168	0.599078	2.365	2.08	2.91	1.295	4.72	-18.9346
-1	-1	-7	-5	7	Wt(-1,-1,-7,-5,7)	-0.274222	-0.421036	-0.761015	-0.641864	-1.85205e-17	9.23168	0.548749	2.365	2.08	2.91	1.295	4.72	-18.9346
-1	-1	-7	-5	9	Wt(-1,-1,-7,-5,9)	-0.274222	-0.421036	-0.761015	-0.641864	0	9.23168	0.500147	2.365	2.08	2.91	1.295	4.72	-18.9346
-1	-1	-7	-7	1	Wt(-1,-1,-7,-7,1)	-0.242023	-0.39149	-0.719808	-0.700899	-1.61626e-17	10.5785	0.688138	2.385	2.045	2.945	1.255	4.72	-19.9921
-1	-1	-7	-7	3	Wt(-1,-1,-7,-7,3)	-0.242023	-0.39149	-0.719808	-0.700899	-1.61626e-17	10.5785	0.659701	2.385	2.045	2.945	1.255	4.72	-19.9921
-1	-1	-7	-7	5	Wt(-1,-1,-7,-7,5)	-0.242023	-0.39149	-0.719808	-0.700899	-1.61626e-17	10.5785	0.621122	2.385	2.045	2.945	1.255	4.72	-19.9921
-1	-1	-7	-7	7	Wt(-1,-1,-7,-7,7)	-0.242023	-0.39149	-0.719808	-0.700899	-1.61626e-17	10.5785	0.577862	2.385	2.045	2.945	1.255	4.72	-19.9921
-1	-1	-7	-7	9	Wt(-1,-1,-7,-7,9)	-0.242023	-0.39149	-0.719808	-0.700899	0	10.5785	0.534093	2.385	2.045	2.945	1.255	4.72	-19.9921
-1	-1	-7	-9	1	Wt(-1,-1,-7,-9,1)	-0.215341	-0.365638	-0.682345	-0.740562	0	12.0225	0.691765	2.235	1.955	2.995	1.24	4.73	-21.0291
-1	-1	-7	-9	3	Wt(-1,-1,-7,-9,3)	-0.215341	-0.365638	-0.682345	-0.740562	-1.42214e-17	12.0225	0.669617	2.235	1.955	2.995	1.24	4.73	-21.0291
-1	-1	-7	-9	5	Wt(-1,-1,-7,-9,5)	-0.215341	-0.365638	-0.682345	-0.740562	0	12.0225	0.638277	2.235	1.955	2.995	1.24	4.73	-21.0291
-1	-1	-7	-9	7	Wt(-1,-1,-7,-9,7)	-0.215341	-0.365638	-0.682345	-0.740562	-2.84427e-17	12.0225	0.601619	2.235	1.955	2.995	1.24	4.73	-21.0291
-1	-1	-7	-9	9	Wt(-1,-1,-7,-9,9)	-0.215341	-0.365638	-0.682345	-0.740562	-1.42214e-17	12.0225	0.562993	2.235	1.955	2.995	1.24	4.73	-21.0291
-1	-1	-9	-1	1	Wt(-1,-1,-9,-1,1)	-0.329004	-0.457408	-0.836241	-0.405656	0	8.71823	0.671746	2.13	1.835	2.835	1.735	4.8	-20.2183
-1	-1	-9	-1	3	Wt(-1,-1,-9,-1,3)	-0.329004	-0.457408	-0.836241	-0.405656	0	8.71823	0.627576	2.13	1.835	2.835	1.735	4.8	-20.2183
-1	-1	-9	-1	5	Wt(-1,-1,-9,-1,5)	-0.329004	-0.457408	-0.836241	-0.405656	0	8.71823	0.575299	2.13	1.835	2.835	1.735	4.8	-20.2183
-1	-1	-9	-1	7	Wt(-1,-1,-9,-1,7)	-0.329004	-0.457408	-0.836241	-0.405656	0	8.71823	0.522472	2.13	1.835	2.835	1.735	4.8	-20.2183
-1	-1	-9	-1	9	Wt(-1,-1,-9,-1,9)	-0.329004	-0.457408	-0.836241	-0.405656	3.92226e-17	8.71823	0.473267	2.13	1.835	2.835	1.735	4.8	-20.2183
-1	-1	-9	-3	1	Wt(-1,-1,-9,-3,1)	-0.300195	-0.439593	-0.816492	-0.520756	-1.77168e-17	9.65049	0.678185	2.34	2.015	2.875	1.41	4.705	-21.5289
-1	-1	-9	-3	3	Wt(-1,-1,-9,-3,3)	-0.300195	-0.439593	-0.816492	-0.520756	-5.31504e-17	9.65049	0.641185	2.34	2.015	2.875	1.41	4.705	-21.5289
-1	-1	-9	-3	5	Wt(-1,-1,-9,-3,5)	-0.300195	-0.439593	-0.816492	-0.520756	0	9.65049	0.595416	2.34	2.015	2.875	1.41	4.705	-21.5289
-1	-1	-9	-3	7	Wt(-1,-1,-9,-3,7)	-0.300195	-0.439593	-0.816492	-0.520756	-1.77168e-17	9.65049	0.547242	2.34	2.015	2.875	1.41	4.705	-21.5289
-1	-1	-9	-3	9	Wt(-1,-1,-9,-3,9)	-0.300195	-0.439593	-0.816492	-0.520756	-5.31504e-17	9.65049	0.500763	2.34	2.015	2.875	1.41	4.705	-21.5289
-1	-1	-9	-5	1	Wt(-1,-1,-9,-5,1)	-0.271399	-0.417135	-0.785568	-0.604304	0	10.7802	0.683628	2.365	2.08	2.91	1.295	4.72	-22.6558
-1	-1	-9	-5	3	Wt(-1,-1,-9,-5,3)	-0.271399	-0.417135	-0.785568	-0.604304	-1.58602e-17	10.7802	0.653396	2.365	2.08	2.91	1.295	4.72	-22.6558
-1	-1	-9	-5	5	Wt(-1,-1,-9,-5,5)	-0.271399	-0.417135	-0.785568	-0.604304	-1.58602e-17	10.7802	0.614386	2.365	2.08	2.91	1.295	4.72	-22.6558
-1	-1	-9	-5	7	Wt(-1,-1,-9,-5,7)	-0.271399	-0.417135	-0.785568	-0.604304	-4.75806e-17	10.7802	0.571624	2.365	2.08	2.91	1.295	4.72	-22.6558
-1	-1	-9	-5	9	Wt(-1,-1,-9,-5,9)	-0.271399	-0.417135	-0.785568	-0.604304	-1.58602e-17	10.7802	0.528819	2.365	2.08	2.91	1.295	4.72	-22.6558
-1	-1	-9	-7	1	Wt(-1,-1,-9,-7,1)	-0.245142	-0.394236	-0.751548	-0.664082	0	12.0519	0.687881	2.365	2.08	2.91	1.295	4.72	-23.7379
-1	-1	-9	-7	3	Wt(-1,-1,-9,-7,3)	-0.245142	-0.394236	-0.751548	-0.664082	0	12.0519	0.663431	2.365	2.08	2.91	1.295	4.72	-23.7379
-1	-1	-9	-7	5	Wt(-1,-1,-9,-7,5)	-0.245142	-0.394236	-0.751548	-0.664082	-1.41866e-17	12.0519	0.630681	2.365	2.08	2.91	1.295	4.72	-23.7379
-1	-1	-9	-7	7	Wt(-1,-1,-9,-7,7)	-0.245142	-0.394236	-0.751548	-0.664082	-1.41866e-17	12.0519	0.593429	2.365	2.08	2.91	1.295	4.72	-23.7379
-1	-1	-9	-7	9	Wt(-1,-1,-9,-7,9)	-0.245142	-0.394236	-0.751548	-0.664082	1.41866e-17	12.0519	0.554817	2.365	2.08	2.91	1.295	4.72	-23.7379
-1	-1	-9	-9	1	Wt(-1,-1,-9,-9,1)	-0.222201	-0.372861	-0.718535	-0.70705	-2.54706e-17	13.4253	0.691088	2.385	2.045	2.945	1.255	4.72	-24.7905
-1	-1	-9	-9	3	Wt(-1,-1,-9,-9,3)	-0.222201	-0.372861	-0.718535	-0.70705	-2.54706e-17	13.4253	0.67133	2.385	2.045	2.945	1.255	4.72	-24.7905
-1	-1	-9	-9	5	Wt(-1,-1,-9,-9,5)	-0.222201	-0.372861	-0.718535	-0.70705	-1.27353e-17	13.4253	0.644001	2.385	2.045	2.945	1.255	4.72	-24.7905
-1	-1	-9	-9	7	Wt(-1,-1,-9,-9,7)	-0.222201	-0.372861	-0.718535	-0.70705	0	13.4253	0.611907	2.385	2.045	2.945	1.255	4.72	-24.7905
-1	-1	-9	-9	9	Wt(-1,-1,-9,-9,9)	-0.222201	-0.372861	-0.718535	-0.70705	-1.27353e-17	13.4253	0.577587	2.385	2.045	2.945	1.255	4.72	-24.7905
-1	-3	-1	-1	1	Wt(-1,-3,-1,-1,1)	-0.539833	-0.785368	-0.556059	-0.374987	-2.23382e-17	3.82698	0.644807	2.03	1.175	3.165	1.74	4.8	-7.30147
-1	-3	-1	-1	3	Wt(-1,-3,-1,-1,3)	-0.539833	-0.785368	-0.556059	-0.374987	0	3.82698	0.526437	2.03	1.175	3.165	1.74	4.8	-7.30147
-1	-3	-1	-1	5	Wt(-1,-3,-1,-1,5)	-0.539833	-0.785368	-0.556059	-0.374987	-2.23382e-17	3.82698	0.421107	2.03	1.175	3.165	1.74	4.8	-7.30147
-1	-3	-1	-1	7	Wt(-1,-3,-1,-1,7)	-0.539833	-0.785368	-0.556059	-0.374987	2.23382e-17	3.82698	0.343045	2.03	1.175	3.165	1.74	4.8	-7.30147
-1	-3	-1	-1	9	Wt(-1,-3,-1,-1,9)	-0.539833	-0.785368	-0.556059	-0.374987	-4.46764e-17	3.82698	0.28649	2.03	1.175	3.165	1.74	4.8	-7.30147
-1	-3	-1	-3	1	Wt(-1,-3,-1,-3,1)	-0.433345	-0.674459	-0.562111	-0.604932	-5.30582e-17	4.83363	0.667264	2.34	1.265	3.315	1.26	4.83	-8.48205
-1	-3	-1	-3	3	Wt(-1,-3,-1,-3,3)	-0.433345	-0.674459	-0.562111	-0.604932	-3.53721e-17	4.83363	0.579404	2.34	1.265	3.315	1.26	4.83	-8.48205
-1	-3	-1	-3	5	Wt(-1,-3,-1,-3,5)	-0.433345	-0.674459	-0.562111	-0.604932	-1.76861e-17	4.83363	0.486196	2.34	1.265	3.315	1.26	4.83	-8.48205
-1	-3	-1	-3	7	Wt(-1,-3,-1,-3,7)	-0.433345	-0.674459	-0.562111	-0.604932	-3.53721e-17	4.83363	0.408223	2.34	1.265	3.315	1.26	4.83	-8.48205
-1	-3	-1	-3	9	Wt(-1,-3,-1,-3,9)	-0.433345	-0.674459	-0.562111	-0.604932	-5.30582e-17	4.83363	0.347316	2.34	1.265	3.315	1.26	4.83	-8.48205
-1	-3	-1	-5	1	Wt(-1,-3,-1,-5,1)	-0.344277	-0.569856	-0.536044	-0.71552	0	6.16749	0.681712	2.415	1.285	3.325	1.22	4.815	-9.49277
-1	-3	-1	-5	3	Wt(-1,-3,-1,-5,3)	-0.344277	-0.569856	-0.536044	-0.71552	0	6.16749	0.621524	2.415	1.285	3.325	1.22	4.815	-9.49277
-1	-3	-1	-5	5	Wt(-1,-3,-1,-5,5)	-0.344277	-0.569856	-0.536044	-0.71552	-1.3861e-17	6.16749	0.546823	2.415	1.285	3.325	1.22	4.815	-9.49277
-1	-3	-1	-5	7	Wt(-1,-3,-1,-5,7)	-0.344277	-0.569856	-0.536044	-0.71552	-1.3861e-17	6.16749	0.475729	2.415	1.285	3.325	1.22	4.815	-9.49277
-1	-3	-1	-5	9	Wt(-1,-3,-1,-5,9)	-0.344277	-0.569856	-0.536044	-0.71552	0	6.16749	0.414817	2.415	1.285	3.325	1.22	4.815	-9.49277
-1	-3	-1	-7	1	Wt(-1,-3,-1,-7,1)	-0.280962	-0.49208	-0.508527	-0.770536	0	7.65948	0.689656	2.415	1.285	3.325	1.22	4.815	-10.4971
-1	-3	-1	-7	3	Wt(-1,-3,-1,-7,3)	-0.280962	-0.49208	-0.508527	-0.770536	0	7.65948	0.648579	2.415	1.285	3.325	1.22	4.815	-10.4971
-1	-3	-1	-7	5	Wt(-1,-3,-1,-7,5)	-0.280962	-0.49208	-0.508527	-0.770536	2.23221e-17	7.65948	0.591457	2.415	1.285	3.325	1.22	4.815	-10.4971
-1	-3	-1	-7	7	Wt(-1,-3,-1,-7,7)	-0.280962	-0.49208	-0.508527	-0.770536	1.11611e-17	7.65948	0.531001	2.415	1.285	3.325	1.22	4.815	-10.4971
-1	-3	-1	-7	9	Wt(-1,-3,-1,-7,9)	-0.280962	-0.49208	-0.508527	-0.770536	-1.11611e-17	7.65948	0.474518	2.415	1.285	3.325	1.22	4.815	-10.4971
-1	-3	-1	-9	1	Wt(-1,-3,-1,-9,1)	-0.236181	-0.43577	-0.485642	-0.800459	-9.25868e-18	9.23326	0.69407	2.43	1.355	3.45	1.18	4.745	-11.4769
-1	-3	-1	-9	3	Wt(-1,-3,-1,-9,3)	-0.236181	-0.43577	-0.485642	-0.800459	-1.85174e-17	9.23326	0.665332	2.43	1.355	3.45	1.18	4.745	-11.4769
-1	-3	-1	-9	5	Wt(-1,-3,-1,-9,5)	-0.236181	-0.43577	-0.485642	-0.800459	0	9.23326	0.622041	2.43	1.355	3.45	1.18	4.745	-11.4769
-1	-3	-1	-9	7	Wt(-1,-3,-1,-9,7)	-0.236181	-0.43577	-0.485642	-0.800459	0	9.23326	0.572414	2.43	1.355	3.45	1.18	4.745	-11.4769
-1	-3	-1	-9	9	Wt(-1,-3,-1,-9,9)	-0.236181	-0.43577	-0.485642	-0.800459	-9.25868e-18	9.23326	0.522587	2.43	1.355	3.45	1.18	4.745	-11.4769
-1	-3	-3	-1	1	Wt(-1,-3,-3,-1,1)	-0.482062	-0.708458	-0.699764	-0.396618	0	5.10334	0.65504	1.945	1.245	3.11	1.71	4.805	-11.2564
-1	-3	-3	-1	3	Wt(-1,-3,-3,-1,3)	-0.482062	-0.708458	-0.699764	-0.396618	-3.35027e-17	5.10334	0.568621	1.945	1.245	3.11	1.71	4.805	-11.2564
-1	-3	-3	-1	5	Wt(-1,-3,-3,-1,5)	-0.482062	-0.708458	-0.699764	-0.396618	-6.70054e-17	5.10334	0.4811	1.945	1.245	3.11	1.71	4.805	-11.2564
-1	-3	-3	-1	7	Wt(-1,-3,-3,-1,7)	-0.482062	-0.708458	-0.699764	-0.396618	-3.35027e-17	5.10334	0.407789	1.945	1.245	3.11	1.71	4.805	-11.2564
-1	-3	-3	-1	9	Wt(-1,-3,-3,-1,9)	-0.482062	-0.708458	-0.699764	-0.396618	-3.35027e-17	5.10334	0.349813	1.945	1.245	3.11	1.71	4.805	-11.2564
-1	-3	-3	-3	1	Wt(-1,-3,-3,-3,1)	-0.408507	-0.63521	-0.682832	-0.576616	0	6.09248	0.670176	2.315	1.34	3.15	1.335	4.755	-12.543
-1	-3	-3	-3	3	Wt(-1,-3,-3,-3,3)	-0.408507	-0.63521	-0.682832	-0.576616	0	6.09248	0.603262	2.315	1.34	3.15	1.335	4.755	-12.543
-1	-3	-3	-3	5	Wt(-1,-3,-3,-3,5)	-0.408507	-0.63521	-0.682832	-0.576616	0	6.09248	0.527361	2.315	1.34	3.15	1.335	4.755	-12.543
-1	-3	-3	-3	7	Wt(-1,-3,-3,-3,7)	-0.408507	-0.63521	-0.682832	-0.576616	0	6.09248	0.457862	2.315	1.34	3.15	1.335	4.755	-12.543
-1	-3	-3	-3	9	Wt(-1,-3,-3,-3,9)	-0.408507	-0.63521	-0.682832	-0.576616	0	6.09248	0.399325	2.315	1.34	3.15	1.335	4.755	-12.543
-1	-3	-3	-5	1	Wt(-1,-3,-3,-5,1)	-0.342122	-0.560504	-0.645392	-0.679749	0	7.35855	0.681131	2.35	1.35	3.2	1.27	4.775	-13.62
-1	-3	-3	-5	3	Wt(-1,-3,-3,-5,3)	-0.342122	-0.560504	-0.645392	-0.679749	0	7.35855	0.632005	2.35	1.35	3.2	1.27	4.775	-13.62
-1	-3	-3	-5	5	Wt(-1,-3,-3,-5,5)	-0.342122	-0.560504	-0.645392	-0.679749	0	7.35855	0.570216	2.35	1.35	3.2	1.27	4.775	-13.62
-1	-3	-3	-5	7	Wt(-1,-3,-3,-5,7)	-0.342122	-0.560504	-0.645392	-0.679749	-2.3235e-17	7.35855	0.50824	2.35	1.35	3.2	1.27	4.775	-13.62
-1	-3	-3	-5	9	Wt(-1,-3,-3,-5,9)	-0.342122	-0.560504	-0.645392	-0.679749	-2.3235e-17	7.35855	0.452168	2.35	1.35	3.2	1.27	4.775	-13.62
-1	-3	-3	-7	1	Wt(-1,-3,-3,-7,1)	-0.289916	-0.498599	-0.607811	-0.739065	-2.92013e-17	8.7826	0.688098	2.43	1.31	3.3	1.22	4.78	-14.6334
-1	-3	-3	-7	3	Wt(-1,-3,-3,-7,3)	-0.289916	-0.498599	-0.607811	-0.739065	-2.92013e-17	8.7826	0.65234	2.43	1.31	3.3	1.22	4.78	-14.6334
-1	-3	-3	-7	5	Wt(-1,-3,-3,-7,5)	-0.289916	-0.498599	-0.607811	-0.739065	-9.73378e-18	8.7826	0.603578	2.43	1.31	3.3	1.22	4.78	-14.6334
-1	-3	-3	-7	7	Wt(-1,-3,-3,-7,7)	-0.289916	-0.498599	-0.607811	-0.739065	-9.73378e-18	8.7826	0.550723	2.43	1.31	3.3	1.22	4.78	-14.6334
-1	-3	-3	-7	9	Wt(-1,-3,-3,-7,9)	-0.289916	-0.498599	-0.607811	-0.739065	-2.92013e-17	8.7826	0.499599	2.43	1.31	3.3	1.22	4.78	-14.6334
-1	-3	-3	-9	1	Wt(-1,-3,-3,-9,1)	-0.250009	-0.449884	-0.575492	-0.774796	-1.66007e-17	10.2993	0.692447	2.34	1.42	3.265	1.205	4.775	-15.6373
-1	-3	-3	-9	3	Wt(-1,-3,-3,-9,3)	-0.250009	-0.449884	-0.575492	-0.774796	0	10.2993	0.666099	2.34	1.42	3.265	1.205	4.775	-15.6373
-1	-3	-3	-9	5	Wt(-1,-3,-3,-9,5)	-0.250009	-0.449884	-0.575492	-0.774796	-1.66007e-17	10.2993	0.627906	2.34	1.42	3.265	1.205	4.775	-15.6373
-1	-3	-3	-9	7	Wt(-1,-3,-3,-9,7)	-0.250009	-0.449884	-0.575492	-0.774796	-2.49011e-17	10.2993	0.583892	2.34	1.42	3.265	1.205	4.775	-15.6373
-1	-3	-3	-9	9	Wt(-1,-3,-3,-9,9)	-0.250009	-0.449884	-0.575492	-0.774796	0	10.2993	0.538833	2.34	1.42	3.265	1.205	4.775	-15.6373
-1	-3	-5	-1	1	Wt(-1,-3,-5,-1,1)	-0.434197	-0.642767	-0.762761	-0.3975	0	6.5738	0.663028	2.04	1.34	3	1.81	4.8	-15.1511
-1	-3	-5	-1	3	Wt(-1,-3,-5,-1,3)	-0.434197	-0.642767	-0.762761	-0.3975	-2.60086e-17	6.5738	0.599143	2.04	1.34	3	1.81	4.8	-15.1511
-1	-3	-5	-1	5	Wt(-1,-3,-5,-1,5)	-0.434197	-0.642767	-0.762761	-0.3975	0	6.5738	0.528724	2.04	1.34	3	1.81	4.8	-15.1511
-1	-3	-5	-1	7	Wt(-1,-3,-5,-1,7)	-0.434197	-0.642767	-0.762761	-0.3975	-2.60086e-17	6.5738	0.463782	2.04	1.34	3	1.81	4.8	-15.1511
-1	-3	-5	-1	9	Wt(-1,-3,-5,-1,9)	-0.434197	-0.642767	-0.762761	-0.3975	0	6.5738	0.408195	2.04	1.34	3	1.81	4.8	-15.1511
-1	-3	-5	-3	1	Wt(-1,-3,-5,-3,1)	-0.38306	-0.595236	-0.74449	-0.545026	0	7.52629	0.673319	2.295	1.475	3.08	1.32	4.74	-16.4905
-1	-3	-5	-3	3	Wt(-1,-3,-5,-3,3)	-0.38306	-0.595236	-0.74449	-0.545026	-2.27171e-17	7.52629	0.621761	2.295	1.475	3.08	1.32	4.74	-16.4905
-1	-3	-5	-3	5	Wt(-1,-3,-5,-3,5)	-0.38306	-0.595236	-0.74449	-0.545026	-4.54342e-17	7.52629	0.560622	2.295	1.475	3.08	1.32	4.74	-16.4905
-1	-3	-5	-3	7	Wt(-1,-3,-5,-3,7)	-0.38306	-0.595236	-0.74449	-0.545026	-4.54342e-17	7.52629	0.500585	2.295	1.475	3.08	1.32	4.74	-16.4905
-1	-3	-5	-3	9	Wt(-1,-3,-5,-3,9)	-0.38306	-0.595236	-0.74449	-0.545026	-2.27171e-17	7.52629	0.446607	2.295	1.475	3.08	1.32	4.74	-16.4905
-1	-3	-5	-5	1	Wt(-1,-3,-5,-5,1)	-0.333928	-0.542963	-0.710155	-0.641198	0	8.71958	0.681483	2.32	1.475	3.095	1.295	4.75	-17.5914
-1	-3	-5	-5	3	Wt(-1,-3,-5,-5,3)	-0.333928	-0.542963	-0.710155	-0.641198	-1.96082e-17	8.71958	0.641437	2.32	1.475	3.095	1.295	4.75	-17.5914
-1	-3	-5	-5	5	Wt(-1,-3,-5,-5,5)	-0.333928	-0.542963	-0.710155	-0.641198	-1.96082e-17	8.71958	0.590575	2.32	1.475	3.095	1.295	4.75	-17.5914
-1	-3	-5	-5	7	Wt(-1,-3,-5,-5,7)	-0.333928	-0.542963	-0.710155	-0.641198	0	8.71958	0.537351	2.32	1.475	3.095	1.295	4.75	-17.5914
-1	-3	-5	-5	9	Wt(-1,-3,-5,-5,9)	-0.333928	-0.542963	-0.710155	-0.641198	-1.96082e-17	8.71958	0.486863	2.32	1.475	3.095	1.295	4.75	-17.5914
-1	-3	-5	-7	1	Wt(-1,-3,-5,-7,1)	-0.292043	-0.495501	-0.673519	-0.703181	-1.69814e-17	10.0684	0.687294	2.33	1.485	3.13	1.255	4.76	-18.6473
-1	-3	-5	-7	3	Wt(-1,-3,-5,-7,3)	-0.292043	-0.495501	-0.673519	-0.703181	-1.69814e-17	10.0684	0.656536	2.33	1.485	3.13	1.255	4.76	-18.6473
-1	-3	-5	-7	5	Wt(-1,-3,-5,-7,5)	-0.292043	-0.495501	-0.673519	-0.703181	-3.39628e-17	10.0684	0.615162	2.33	1.485	3.13	1.255	4.76	-18.6473
-1	-3	-5	-7	7	Wt(-1,-3,-5,-7,7)	-0.292043	-0.495501	-0.673519	-0.703181	0	10.0684	0.56937	2.33	1.485	3.13	1.255	4.76	-18.6473
-1	-3	-5	-7	9	Wt(-1,-3,-5,-7,9)	-0.292043	-0.495501	-0.673519	-0.703181	0	10.0684	0.523683	2.33	1.485	3.13	1.255	4.76	-18.6473
-1	-3	-5	-9	1	Wt(-1,-3,-5,-9,1)	-0.257774	-0.455225	-0.639877	-0.743937	-2.96878e-17	11.5183	0.691293	2.425	1.555	3.195	1.18	4.745	-19.6571
-1	-3	-5	-9	3	Wt(-1,-3,-5,-9,3)	-0.257774	-0.455225	-0.639877	-0.743937	-1.48439e-17	11.5183	0.667575	2.425	1.555	3.195	1.18	4.745	-19.6571
-1	-3	-5	-9	5	Wt(-1,-3,-5,-9,5)	-0.257774	-0.455225	-0.639877	-0.743937	-1.48439e-17	11.5183	0.63416	2.425	1.555	3.195	1.18	4.745	-19.6571
-1	-3	-5	-9	7	Wt(-1,-3,-5,-9,7)	-0.257774	-0.455225	-0.639877	-0.743937	0	11.5183	0.595423	2.425	1.555	3.195	1.18	4.745	-19.6571
-1	-3	-5	-9	9	Wt(-1,-3,-5,-9,9)	-0.257774	-0.455225	-0.639877	-0.743937	0	11.5183	0.555036	2.425	1.555	3.195	1.18	4.745	-19.6571
-1	-3	-7	-1	1	Wt(-1,-3,-7,-1,1)	-0.399387	-0.594477	-0.793895	-0.393679	-2.10205e-17	8.13376	0.668495	2.075	1.52	2.895	1.86	4.8	-18.9215
-1	-3	-7	-1	3	Wt(-1,-3,-7,-1,3)	-0.399387	-0.594477	-0.793895	-0.393679	2.10205e-17	8.13376	0.619557	2.075	1.52	2.895	1.86	4.8	-18.9215
-1	-3	-7	-1	5	Wt(-1,-3,-7,-1,5)	-0.399387	-0.594477	-0.793895	-0.393679	0	8.13376	0.562912	2.075	1.52	2.895	1.86	4.8	-18.9215
-1	-3	-7	-1	7	Wt(-1,-3,-7,-1,7)	-0.399387	-0.594477	-0.793895	-0.393679	-2.10205e-17	8.13376	0.507035	2.075	1.52	2.895	1.86	4.8	-18.9215
-1	-3	-7	-1	9	Wt(-1,-3,-7,-1,9)	-0.399387	-0.594477	-0.793895	-0.393679	0	8.13376	0.456108	2.075	1.52	2.895	1.86	4.8	-18.9215
-1	-3	-7	-3	1	Wt(-1,-3,-7,-3,1)	-0.362031	-0.562269	-0.778404	-0.518214	0	9.05231	0.675883	2.175	1.54	3.04	1.395	4.705	-20.359
-1	-3	-7	-3	3	Wt(-1,-3,-7,-3,3)	-0.362031	-0.562269	-0.778404	-0.518214	-3.7775e-17	9.05231	0.635049	2.175	1.54	3.04	1.395	4.705	-20.359
-1	-3	-7	-3	5	Wt(-1,-3,-7,-3,5)	-0.362031	-0.562269	-0.778404	-0.518214	-3.7775e-17	9.05231	0.585395	2.175	1.54	3.04	1.395	4.705	-20.359
-1	-3	-7	-3	7	Wt(-1,-3,-7,-3,7)	-0.362031	-0.562269	-0.778404	-0.518214	-1.88875e-17	9.05231	0.534178	2.175	1.54	3.04	1.395	4.705	-20.359
-1	-3	-7	-3	9	Wt(-1,-3,-7,-3,9)	-0.362031	-0.562269	-0.778404	-0.518214	-1.88875e-17	9.05231	0.485709	2.175	1.54	3.04	1.395	4.705	-20.359
-1	-3	-7	-5	1	Wt(-1,-3,-7,-5,1)	-0.324661	-0.524847	-0.749841	-0.606913	1.67909e-17	10.1827	0.68212	2.2	1.58	3.04	1.335	4.73	-21.487
-1	-3	-7	-5	3	Wt(-1,-3,-7,-5,3)	-0.324661	-0.524847	-0.749841	-0.606913	0	10.1827	0.649021	2.2	1.58	3.04	1.335	4.73	-21.487
-1	-3	-7	-5	5	Wt(-1,-3,-7,-5,5)	-0.324661	-0.524847	-0.749841	-0.606913	0	10.1827	0.606816	2.2	1.58	3.04	1.335	4.73	-21.487
-1	-3	-7	-5	7	Wt(-1,-3,-7,-5,7)	-0.324661	-0.524847	-0.749841	-0.606913	1.67909e-17	10.1827	0.561272	2.2	1.58	3.04	1.335	4.73	-21.487
-1	-3	-7	-5	9	Wt(-1,-3,-7,-5,9)	-0.324661	-0.524847	-0.749841	-0.606913	-1.67909e-17	10.1827	0.516408	2.2	1.58	3.04	1.335	4.73	-21.487
-1	-3	-7	-7	1	Wt(-1,-3,-7,-7,1)	-0.29092	-0.488456	-0.717515	-0.669057	-1.49164e-17	11.4623	0.686931	2.43	1.575	3.07	1.27	4.7	-22.5673
-1	-3	-7	-7	3	Wt(-1,-3,-7,-7,3)	-0.29092	-0.488456	-0.717515	-0.669057	-2.98327e-17	11.4623	0.660413	2.43	1.575	3.07	1.27	4.7	-22.5673
-1	-3	-7	-7	5	Wt(-1,-3,-7,-7,5)	-0.29092	-0.488456	-0.717515	-0.669057	-1.49164e-17	11.4623	0.625162	2.43	1.575	3.07	1.27	4.7	-22.5673
-1	-3	-7	-7	7	Wt(-1,-3,-7,-7,7)	-0.29092	-0.488456	-0.717515	-0.669057	-4.47491e-17	11.4623	0.585528	2.43	1.575	3.07	1.27	4.7	-22.5673
-1	-3	-7	-7	9	Wt(-1,-3,-7,-7,9)	-0.29092	-0.488456	-0.717515	-0.669057	-1.49164e-17	11.4623	0.544964	2.43	1.575	3.07	1.27	4.7	-22.5673
-1	-3	-7	-9	1	Wt(-1,-3,-7,-9,1)	-0.261803	-0.455628	-0.686042	-0.712858	-1.33089e-17	12.8467	0.690501	2.395	1.64	3.07	1.245	4.71	-23.6024
-1	-3	-7	-9	3	Wt(-1,-3,-7,-9,3)	-0.261803	-0.455628	-0.686042	-0.712858	-2.66178e-17	12.8467	0.669271	2.395	1.64	3.07	1.245	4.71	-23.6024
-1	-3	-7	-9	5	Wt(-1,-3,-7,-9,5)	-0.261803	-0.455628	-0.686042	-0.712858	0	12.8467	0.640036	2.395	1.64	3.07	1.245	4.71	-23.6024
-1	-3	-7	-9	7	Wt(-1,-3,-7,-9,7)	-0.261803	-0.455628	-0.686042	-0.712858	-2.66178e-17	12.8467	0.605984	2.395	1.64	3.07	1.245	4.71	-23.6024
-1	-3	-7	-9	9	Wt(-1,-3,-7,-9,9)	-0.261803	-0.455628	-0.686042	-0.712858	-1.33089e-17	12.8467	0.569924	2.395	1.64	3.07	1.245	4.71	-23.6024
-1	-3	-9	-1	1	Wt(-1,-3,-9,-1,1)	-0.373983	-0.559043	-0.811109	-0.389217	0	9.74031	0.672283	2.075	1.52	2.895	1.86	4.8	-22.6418
-1	-3	-9	-1	3	Wt(-1,-3,-9,-1,3)	-0.373983	-0.559043	-0.811109	-0.389217	0	9.74031	0.633429	2.075	1.52	2.895	1.86	4.8	-22.6418
-1	-3	-9	-1	5	Wt(-1,-3,-9,-1,5)	-0.373983	-0.559043	-0.811109	-0.389217	-3.51068e-17	9.74031	0.587237	2.075	1.52	2.895	1.86	4.8	-22.6418
-1	-3	-9	-1	7	Wt(-1,-3,-9,-1,7)	-0.373983	-0.559043	-0.811109	-0.389217	0	9.74031	0.539548	2.075	1.52	2.895	1.86	4.8	-22.6418
-1	-3	-9	-1	9	Wt(-1,-3,-9,-1,9)	-0.373983	-0.559043	-0.811109	-0.389217	0	9.74031	0.493977	2.075	1.52	2.895	1.86	4.8	-22.6418
-1	-3	-9	-3	1	Wt(-1,-3,-9,-3,1)	-0.345353	-0.536149	-0.798565	-0.49667	0	10.6309	0.677872	2.195	1.73	2.94	1.455	4.705	-24.1421
-1	-3	-9	-3	3	Wt(-1,-3,-9,-3,3)	-0.345353	-0.536149	-0.798565	-0.49667	-3.21658e-17	10.6309	0.644606	2.195	1.73	2.94	1.455	4.705	-24.1421
-1	-3	-9	-3	5	Wt(-1,-3,-9,-3,5)	-0.345353	-0.536149	-0.798565	-0.49667	-3.21658e-17	10.6309	0.603648	2.195	1.73	2.94	1.455	4.705	-24.1421
-1	-3	-9	-3	7	Wt(-1,-3,-9,-3,7)	-0.345353	-0.536149	-0.798565	-0.49667	-3.21658e-17	10.6309	0.559961	2.195	1.73	2.94	1.455	4.705	-24.1421
-1	-3	-9	-3	9	Wt(-1,-3,-9,-3,9)	-0.345353	-0.536149	-0.798565	-0.49667	-3.21658e-17	10.6309	0.516992	2.195	1.73	2.94	1.455	4.705	-24.1421
-1	-3	-9	-5	1	Wt(-1,-3,-9,-5,1)	-0.31599	-0.508494	-0.775304	-0.578073	-2.92027e-17	11.7096	0.682791	2.22	1.68	3.005	1.335	4.71	-25.3189
-1	-3	-9	-5	3	Wt(-1,-3,-9,-5,3)	-0.31599	-0.508494	-0.775304	-0.578073	-2.92027e-17	11.7096	0.654947	2.22	1.68	3.005	1.335	4.71	-25.3189
-1	-3	-9	-5	5	Wt(-1,-3,-9,-5,5)	-0.31599	-0.508494	-0.775304	-0.578073	-2.92027e-17	11.7096	0.61947	2.22	1.68	3.005	1.335	4.71	-25.3189
-1	-3	-9	-5	7	Wt(-1,-3,-9,-5,7)	-0.31599	-0.508494	-0.775304	-0.578073	-2.92027e-17	11.7096	0.580359	2.22	1.68	3.005	1.335	4.71	-25.3189
-1	-3	-9	-5	9	Wt(-1,-3,-9,-5,9)	-0.31599	-0.508494	-0.775304	-0.578073	-2.92027e-17	11.7096	0.540703	2.22	1.68	3.005	1.335	4.71	-25.3189
-1	-3	-9	-7	1	Wt(-1,-3,-9,-7,1)	-0.288398	-0.480206	-0.747716	-0.638697	0	12.9293	0.686808	2.315	1.675	3.005	1.32	4.715	-26.4337
-1	-3	-9	-7	3	Wt(-1,-3,-9,-7,3)	-0.288398	-0.480206	-0.747716	-0.638697	2.64477e-17	12.9293	0.66376	2.315	1.675	3.005	1.32	4.715	-26.4337
-1	-3	-9	-7	5	Wt(-1,-3,-9,-7,5)	-0.288398	-0.480206	-0.747716	-0.638697	0	12.9293	0.633465	2.315	1.675	3.005	1.32	4.715	-26.4337
-1	-3	-9	-7	7	Wt(-1,-3,-9,-7,7)	-0.288398	-0.480206	-0.747716	-0.638697	0	12.9293	0.599024	2.315	1.675	3.005	1.32	4.715	-26.4337
-1	-3	-9	-7	9	Wt(-1,-3,-9,-7,9)	-0.288398	-0.480206	-0.747716	-0.638697	-2.64477e-17	12.9293	0.563066	2.315	1.675	3.005	1.32	4.715	-26.4337
-1	-3	-9	-9	1	Wt(-1,-3,-9,-9,1)	-0.263609	-0.453432	-0.71955	-0.683798	1.19949e-17	14.254	0.689963	2.345	1.755	3.045	1.23	4.73	-27.4681
-1	-3	-9	-9	3	Wt(-1,-3,-9,-9,3)	-0.263609	-0.453432	-0.71955	-0.683798	-1.19949e-17	14.254	0.670946	2.345	1.755	3.045	1.23	4.73	-27.4681
-1	-3	-9	-9	5	Wt(-1,-3,-9,-9,5)	-0.263609	-0.453432	-0.71955	-0.683798	-1.19949e-17	14.254	0.645253	2.345	1.755	3.045	1.23	4.73	-27.4681
-1	-3	-9	-9	7	Wt(-1,-3,-9,-9,7)	-0.263609	-0.453432	-0.71955	-0.683798	2.39898e-17	14.254	0.615236	2.345	1.755	3.045	1.23	4.73	-27.4681
-1	-3	-9	-9	9	Wt(-1,-3,-9,-9,9)	-0.263609	-0.453432	-0.71955	-0.683798	1.19949e-17	14.254	0.583049	2.345	1.755	3.045	1.23	4.73	-27.4681
-1	-5	-1	-1	1	Wt(-1,-5,-1,-1,1)	-0.522209	-0.82056	-0.503388	-0.310637	-3.14349e-17	5.43903	0.661588	2.225	1.12	3.225	1.7	4.805	-9.21515
-1	-5	-1	-1	3	Wt(-1,-5,-1,-1,3)	-0.522209	-0.82056	-0.503388	-0.310637	-3.14349e-17	5.43903	0.582437	2.225	1.12	3.225	1.7	4.805	-9.21515
-1	-5	-1	-1	5	Wt(-1,-5,-1,-1,5)	-0.522209	-0.82056	-0.503388	-0.310637	0	5.43903	0.49871	2.225	1.12	3.225	1.7	4.805	-9.21515
-1	-5	-1	-1	7	Wt(-1,-5,-1,-1,7)	-0.522209	-0.82056	-0.503388	-0.310637	0	5.43903	0.426272	2.225	1.12	3.225	1.7	4.805	-9.21515
-1	-5	-1	-1	9	Wt(-1,-5,-1,-1,9)	-0.522209	-0.82056	-0.503388	-0.310637	-3.14349e-17	5.43903	0.367714	2.225	1.12	3.225	1.7	4.805	-9.21515
-1	-5	-1	-3	1	Wt(-1,-5,-1,-3,1)	-0.45754	-0.75234	-0.530572	-0.506899	0	6.27051	0.672953	2.5	1.2	3.355	1.31	4.775	-10.4969
-1	-5	-1	-3	3	Wt(-1,-5,-1,-3,3)	-0.45754	-0.75234	-0.530572	-0.506899	0	6.27051	0.609217	2.5	1.2	3.355	1.31	4.775	-10.4969
-1	-5	-1	-3	5	Wt(-1,-5,-1,-3,5)	-0.45754	-0.75234	-0.530572	-0.506899	-5.45333e-17	6.27051	0.535377	2.5	1.2	3.355	1.31	4.775	-10.4969
-1	-5	-1	-3	7	Wt(-1,-5,-1,-3,7)	-0.45754	-0.75234	-0.530572	-0.506899	-5.45333e-17	6.27051	0.466679	2.5	1.2	3.355	1.31	4.775	-10.4969
-1	-5	-1	-3	9	Wt(-1,-5,-1,-3,9)	-0.45754	-0.75234	-0.530572	-0.506899	0	6.27051	0.408159	2.5	1.2	3.355	1.31	4.775	-10.4969
-1	-5	-1	-5	1	Wt(-1,-5,-1,-5,1)	-0.390686	-0.670362	-0.527974	-0.629296	-2.3052e-17	7.41695	0.682257	2.45	1.25	3.34	1.235	4.835	-11.5299
-1	-5	-1	-5	3	Wt(-1,-5,-1,-5,3)	-0.390686	-0.670362	-0.527974	-0.629296	-2.3052e-17	7.41695	0.634138	2.45	1.25	3.34	1.235	4.835	-11.5299
-1	-5	-1	-5	5	Wt(-1,-5,-1,-5,5)	-0.390686	-0.670362	-0.527974	-0.629296	0	7.41695	0.573022	2.45	1.25	3.34	1.235	4.835	-11.5299
-1	-5	-1	-5	7	Wt(-1,-5,-1,-5,7)	-0.390686	-0.670362	-0.527974	-0.629296	0	7.41695	0.511338	2.45	1.25	3.34	1.235	4.835	-11.5299
-1	-5	-1	-5	9	Wt(-1,-5,-1,-5,9)	-0.390686	-0.670362	-0.527974	-0.629296	-2.3052e-17	7.41695	0.455298	2.45	1.25	3.34	1.235	4.835	-11.5299
-1	-5	-1	-7	1	Wt(-1,-5,-1,-7,1)	-0.334235	-0.596943	-0.514529	-0.703146	-1.95278e-17	8.75551	0.688605	2.525	1.255	3.355	1.22	4.805	-12.5386
-1	-5	-1	-7	3	Wt(-1,-5,-1,-7,3)	-0.334235	-0.596943	-0.514529	-0.703146	9.7639e-18	8.75551	0.652991	2.525	1.255	3.355	1.22	4.805	-12.5386
-1	-5	-1	-7	5	Wt(-1,-5,-1,-7,5)	-0.334235	-0.596943	-0.514529	-0.703146	9.7639e-18	8.75551	0.60416	2.525	1.255	3.355	1.22	4.805	-12.5386
-1	-5	-1	-7	7	Wt(-1,-5,-1,-7,7)	-0.334235	-0.596943	-0.514529	-0.703146	-9.7639e-18	8.75551	0.551134	2.525	1.255	3.355	1.22	4.805	-12.5386
-1	-5	-1	-7	9	Wt(-1,-5,-1,-7,9)	-0.334235	-0.596943	-0.514529	-0.703146	0	8.75551	0.499821	2.525	1.255	3.355	1.22	4.805	-12.5386
-1	-5	-1	-9	1	Wt(-1,-5,-1,-9,1)	-0.289406	-0.536783	-0.498876	-0.748744	-8.37222e-18	10.2109	0.69272	2.525	1.255	3.355	1.22	4.805	-13.5433
-1	-5	-1	-9	3	Wt(-1,-5,-1,-9,3)	-0.289406	-0.536783	-0.498876	-0.748744	-8.37222e-18	10.2109	0.66624	2.525	1.255	3.355	1.22	4.805	-13.5433
-1	-5	-1	-9	5	Wt(-1,-5,-1,-9,5)	-0.289406	-0.536783	-0.498876	-0.748744	-2.51167e-17	10.2109	0.627693	2.525	1.255	3.355	1.22	4.805	-13.5433
-1	-5	-1	-9	7	Wt(-1,-5,-1,-9,7)	-0.289406	-0.536783	-0.498876	-0.748744	-8.37222e-18	10.2109	0.583258	2.525	1.255	3.355	1.22	4.805	-13.5433
-1	-5	-1	-9	9	Wt(-1,-5,-1,-9,9)	-0.289406	-0.536783	-0.498876	-0.748744	-1.67444e-17	10.2109	0.537818	2.525	1.255	3.355	1.22	4.805	-13.5433
-1	-5	-3	-1	1	Wt(-1,-5,-3,-1,1)	-0.49086	-0.76986	-0.634505	-0.34579	2.59468e-17	6.58947	0.664361	2.165	1.15	3.175	1.685	4.8	-13.2203
-1	-5	-3	-1	3	Wt(-1,-5,-3,-1,3)	-0.49086	-0.76986	-0.634505	-0.34579	-2.59468e-17	6.58947	0.600972	2.165	1.15	3.175	1.685	4.8	-13.2203
-1	-5	-3	-1	5	Wt(-1,-5,-3,-1,5)	-0.49086	-0.76986	-0.634505	-0.34579	5.18936e-17	6.58947	0.530661	2.165	1.15	3.175	1.685	4.8	-13.2203
-1	-5	-3	-1	7	Wt(-1,-5,-3,-1,7)	-0.49086	-0.76986	-0.634505	-0.34579	2.59468e-17	6.58947	0.465615	2.165	1.15	3.175	1.685	4.8	-13.2203
-1	-5	-3	-1	9	Wt(-1,-5,-3,-1,9)	-0.49086	-0.76986	-0.634505	-0.34579	-2.59468e-17	6.58947	0.409849	2.165	1.15	3.175	1.685	4.8	-13.2203
-1	-5	-3	-3	1	Wt(-1,-5,-3,-3,1)	-0.437971	-0.715027	-0.640214	-0.505658	0	7.45072	0.673707	2.33	1.215	3.21	1.415	4.775	-14.5593
-1	-5	-3	-3	3	Wt(-1,-5,-3,-3,3)	-0.437971	-0.715027	-0.640214	-0.505658	2.29475e-17	7.45072	0.621639	2.33	1.215	3.21	1.415	4.775	-14.5593
-1	-5	-3	-3	5	Wt(-1,-5,-3,-3,5)	-0.437971	-0.715027	-0.640214	-0.505658	2.29475e-17	7.45072	0.559836	2.33	1.215	3.21	1.415	4.775	-14.5593
-1	-5	-3	-3	7	Wt(-1,-5,-3,-3,7)	-0.437971	-0.715027	-0.640214	-0.505658	0	7.45072	0.499259	2.33	1.215	3.21	1.415	4.775	-14.5593
-1	-5	-3	-3	9	Wt(-1,-5,-3,-3,9)	-0.437971	-0.715027	-0.640214	-0.505658	2.29475e-17	7.45072	0.44493	2.33	1.215	3.21	1.415	4.775	-14.5593
-1	-5	-3	-5	1	Wt(-1,-5,-3,-5,1)	-0.383815	-0.650822	-0.624834	-0.612871	0	8.57678	0.681548	2.345	1.27	3.26	1.285	4.82	-15.6864
-1	-5	-3	-5	3	Wt(-1,-5,-3,-5,3)	-0.383815	-0.650822	-0.624834	-0.612871	0	8.57678	0.640684	2.345	1.27	3.26	1.285	4.82	-15.6864
-1	-5	-3	-5	5	Wt(-1,-5,-3,-5,5)	-0.383815	-0.650822	-0.624834	-0.612871	0	8.57678	0.58881	2.345	1.27	3.26	1.285	4.82	-15.6864
-1	-5	-3	-5	7	Wt(-1,-5,-3,-5,7)	-0.383815	-0.650822	-0.624834	-0.612871	-1.99347e-17	8.57678	0.534729	2.345	1.27	3.26	1.285	4.82	-15.6864
-1	-5	-3	-5	9	Wt(-1,-5,-3,-5,9)	-0.383815	-0.650822	-0.624834	-0.612871	-1.99347e-17	8.57678	0.48365	2.345	1.27	3.26	1.285	4.82	-15.6864
-1	-5	-3	-7	1	Wt(-1,-5,-3,-7,1)	-0.336178	-0.590884	-0.602184	-0.682907	-1.73096e-17	9.8775	0.68729	2.415	1.285	3.325	1.22	4.815	-16.6949
-1	-5	-3	-7	3	Wt(-1,-5,-3,-7,3)	-0.336178	-0.590884	-0.602184	-0.682907	0	9.8775	0.655752	2.415	1.285	3.325	1.22	4.815	-16.6949
-1	-5	-3	-7	5	Wt(-1,-5,-3,-7,5)	-0.336178	-0.590884	-0.602184	-0.682907	0	9.8775	0.613337	2.415	1.285	3.325	1.22	4.815	-16.6949
-1	-5	-3	-7	7	Wt(-1,-5,-3,-7,7)	-0.336178	-0.590884	-0.602184	-0.682907	0	9.8775	0.566566	2.415	1.285	3.325	1.22	4.815	-16.6949
-1	-5	-3	-7	9	Wt(-1,-5,-3,-7,9)	-0.336178	-0.590884	-0.602184	-0.682907	-1.73096e-17	9.8775	0.520119	2.415	1.285	3.325	1.22	4.815	-16.6949
-1	-5	-3	-9	1	Wt(-1,-5,-3,-9,1)	-0.29659	-0.539372	-0.578878	-0.729177	0	11.2927	0.691295	2.415	1.285	3.325	1.22	4.815	-17.6992
-1	-5	-3	-9	3	Wt(-1,-5,-3,-9,3)	-0.29659	-0.539372	-0.578878	-0.729177	1.51404e-17	11.2927	0.666941	2.415	1.285	3.325	1.22	4.815	-17.6992
-1	-5	-3	-9	5	Wt(-1,-5,-3,-9,5)	-0.29659	-0.539372	-0.578878	-0.729177	0	11.2927	0.632607	2.415	1.285	3.325	1.22	4.815	-17.6992
-1	-5	-3	-9	7	Wt(-1,-5,-3,-9,7)	-0.29659	-0.539372	-0.578878	-0.729177	-3.02808e-17	11.2927	0.59292	2.415	1.285	3.325	1.22	4.815	-17.6992
-1	-5	-3	-9	9	Wt(-1,-5,-3,-9,9)	-0.29659	-0.539372	-0.578878	-0.729177	-3.02808e-17	11.2927	0.551714	2.415	1.285	3.325	1.22	4.815	-17.6992
-1	-5	-5	-1	1	Wt(-1,-5,-5,-1,1)	-0.457059	-0.715797	-0.7084	-0.361191	-2.15355e-17	7.93924	0.667898	1.945	1.225	3.115	1.74	4.82	-17.1913
-1	-5	-5	-1	3	Wt(-1,-5,-5,-1,3)	-0.457059	-0.715797	-0.7084	-0.361191	-4.30711e-17	7.93924	0.617366	1.945	1.225	3.115	1.74	4.82	-17.1913
-1	-5	-5	-1	5	Wt(-1,-5,-5,-1,5)	-0.457059	-0.715797	-0.7084	-0.361191	-6.46066e-17	7.93924	0.559192	1.945	1.225	3.115	1.74	4.82	-17.1913
-1	-5	-5	-1	7	Wt(-1,-5,-5,-1,7)	-0.457059	-0.715797	-0.7084	-0.361191	-2.15355e-17	7.93924	0.502227	1.945	1.225	3.115	1.74	4.82	-17.1913
-1	-5	-5	-1	9	Wt(-1,-5,-5,-1,9)	-0.457059	-0.715797	-0.7084	-0.361191	-2.15355e-17	7.93924	0.450674	1.945	1.225	3.115	1.74	4.82	-17.1913
-1	-5	-5	-3	1	Wt(-1,-5,-5,-3,1)	-0.415507	-0.674529	-0.705861	-0.494933	3.88482e-17	8.80226	0.67525	2.29	1.285	3.15	1.425	4.725	-18.5587
-1	-5	-5	-3	3	Wt(-1,-5,-5,-3,3)	-0.415507	-0.674529	-0.705861	-0.494933	1.94241e-17	8.80226	0.632777	2.29	1.285	3.15	1.425	4.725	-18.5587
-1	-5	-5	-3	5	Wt(-1,-5,-5,-3,5)	-0.415507	-0.674529	-0.705861	-0.494933	-1.94241e-17	8.80226	0.581415	2.29	1.285	3.15	1.425	4.725	-18.5587
-1	-5	-5	-3	7	Wt(-1,-5,-5,-3,7)	-0.415507	-0.674529	-0.705861	-0.494933	0	8.80226	0.528858	2.29	1.285	3.15	1.425	4.725	-18.5587
-1	-5	-5	-3	9	Wt(-1,-5,-5,-3,9)	-0.415507	-0.674529	-0.705861	-0.494933	1.94241e-17	8.80226	0.479518	2.29	1.285	3.15	1.425	4.725	-18.5587
-1	-5	-5	-5	1	Wt(-1,-5,-5,-5,1)	-0.372573	-0.625846	-0.687531	-0.590832	1.72814e-17	9.89362	0.681625	2.37	1.295	3.185	1.325	4.77	-19.713
-1	-5	-5	-5	3	Wt(-1,-5,-5,-5,3)	-0.372573	-0.625846	-0.687531	-0.590832	-1.72814e-17	9.89362	0.647107	2.37	1.295	3.185	1.325	4.77	-19.713
-1	-5	-5	-5	5	Wt(-1,-5,-5,-5,5)	-0.372573	-0.625846	-0.687531	-0.590832	-1.72814e-17	9.89362	0.60328	2.37	1.295	3.185	1.325	4.77	-19.713
-1	-5	-5	-5	7	Wt(-1,-5,-5,-5,7)	-0.372573	-0.625846	-0.687531	-0.590832	0	9.89362	0.556323	2.37	1.295	3.185	1.325	4.77	-19.713
-1	-5	-5	-5	9	Wt(-1,-5,-5,-5,9)	-0.372573	-0.625846	-0.687531	-0.590832	0	9.89362	0.510423	2.37	1.295	3.185	1.325	4.77	-19.713
-1	-5	-5	-7	1	Wt(-1,-5,-5,-7,1)	-0.333271	-0.578334	-0.663097	-0.658004	0	11.1465	0.686596	2.425	1.305	3.21	1.285	4.76	-20.7896
-1	-5	-5	-7	3	Wt(-1,-5,-5,-7,3)	-0.333271	-0.578334	-0.663097	-0.658004	0	11.1465	0.658955	2.425	1.305	3.21	1.285	4.76	-20.7896
-1	-5	-5	-7	5	Wt(-1,-5,-5,-7,5)	-0.333271	-0.578334	-0.663097	-0.658004	-1.5339e-17	11.1465	0.622304	2.425	1.305	3.21	1.285	4.76	-20.7896
-1	-5	-5	-7	7	Wt(-1,-5,-5,-7,7)	-0.333271	-0.578334	-0.663097	-0.658004	-1.5339e-17	11.1465	0.581332	2.425	1.305	3.21	1.285	4.76	-20.7896
-1	-5	-5	-7	9	Wt(-1,-5,-5,-7,9)	-0.333271	-0.578334	-0.663097	-0.658004	-1.5339e-17	11.1465	0.53968	2.425	1.305	3.21	1.285	4.76	-20.7896
-1	-5	-5	-9	1	Wt(-1,-5,-5,-9,1)	-0.299183	-0.53554	-0.637785	-0.705172	1.36646e-17	12.5124	0.690294	2.43	1.31	3.3	1.22	4.78	-21.8249
-1	-5	-5	-9	3	Wt(-1,-5,-5,-9,3)	-0.299183	-0.53554	-0.637785	-0.705172	0	12.5124	0.668213	2.43	1.31	3.3	1.22	4.78	-21.8249
-1	-5	-5	-9	5	Wt(-1,-5,-5,-9,5)	-0.299183	-0.53554	-0.637785	-0.705172	1.36646e-17	12.5124	0.637834	2.43	1.31	3.3	1.22	4.78	-21.8249
-1	-5	-5	-9	7	Wt(-1,-5,-5,-9,7)	-0.299183	-0.53554	-0.637785	-0.705172	-1.36646e-17	12.5124	0.6026	2.43	1.31	3.3	1.22	4.78	-21.8249
-1	-5	-5	-9	9	Wt(-1,-5,-5,-9,9)	-0.299183	-0.53554	-0.637785	-0.705172	0	12.5124	0.565494	2.43	1.31	3.3	1.22	4.78	-21.8249
-1	-5	-7	-1	1	Wt(-1,-5,-7,-1,1)	-0.427836	-0.669241	-0.751606	-0.367609	3.63666e-17	9.40289	0.671031	2.08	1.3	3.015	1.8	4.81	-21.0567
-1	-5	-7	-1	3	Wt(-1,-5,-7,-1,3)	-0.427836	-0.669241	-0.751606	-0.367609	-3.63666e-17	9.40289	0.630144	2.08	1.3	3.015	1.8	4.81	-21.0567
-1	-5	-7	-1	5	Wt(-1,-5,-7,-1,5)	-0.427836	-0.669241	-0.751606	-0.367609	3.63666e-17	9.40289	0.581925	2.08	1.3	3.015	1.8	4.81	-21.0567
-1	-5	-7	-1	7	Wt(-1,-5,-7,-1,7)	-0.427836	-0.669241	-0.751606	-0.367609	0	9.40289	0.532642	2.08	1.3	3.015	1.8	4.81	-21.0567
-1	-5	-7	-1	9	Wt(-1,-5,-7,-1,9)	-0.427836	-0.669241	-0.751606	-0.367609	0	9.40289	0.48601	2.08	1.3	3.015	1.8	4.81	-21.0567
-1	-5	-7	-3	1	Wt(-1,-5,-7,-3,1)	-0.394984	-0.638287	-0.746399	-0.482133	-3.33364e-17	10.2576	0.676843	2.2	1.295	3.125	1.485	4.74	-22.5158
-1	-5	-7	-3	3	Wt(-1,-5,-7,-3,3)	-0.394984	-0.638287	-0.746399	-0.482133	0	10.2576	0.641749	2.2	1.295	3.125	1.485	4.74	-22.5158
-1	-5	-7	-3	5	Wt(-1,-5,-7,-3,5)	-0.394984	-0.638287	-0.746399	-0.482133	0	10.2576	0.598836	2.2	1.295	3.125	1.485	4.74	-22.5158
-1	-5	-7	-3	7	Wt(-1,-5,-7,-3,7)	-0.394984	-0.638287	-0.746399	-0.482133	0	10.2576	0.553488	2.2	1.295	3.125	1.485	4.74	-22.5158
-1	-5	-7	-3	9	Wt(-1,-5,-7,-3,9)	-0.394984	-0.638287	-0.746399	-0.482133	0	10.2576	0.509309	2.2	1.295	3.125	1.485	4.74	-22.5158
-1	-5	-7	-5	1	Wt(-1,-5,-7,-5,1)	-0.36068	-0.60125	-0.728848	-0.56878	0	11.3128	0.68203	2.315	1.34	3.15	1.335	4.755	-23.6852
-1	-5	-7	-5	3	Wt(-1,-5,-7,-5,3)	-0.36068	-0.60125	-0.728848	-0.56878	0	11.3128	0.652675	2.315	1.34	3.15	1.335	4.755	-23.6852
-1	-5	-7	-5	5	Wt(-1,-5,-7,-5,5)	-0.36068	-0.60125	-0.728848	-0.56878	0	11.3128	0.615463	2.315	1.34	3.15	1.335	4.755	-23.6852
-1	-5	-7	-5	7	Wt(-1,-5,-7,-5,7)	-0.36068	-0.60125	-0.728848	-0.56878	3.02271e-17	11.3128	0.574759	2.315	1.34	3.15	1.335	4.755	-23.6852
-1	-5	-7	-5	9	Wt(-1,-5,-7,-5,9)	-0.36068	-0.60125	-0.728848	-0.56878	3.02271e-17	11.3128	0.533838	2.315	1.34	3.15	1.335	4.755	-23.6852
-1	-5	-7	-7	1	Wt(-1,-5,-7,-7,1)	-0.328252	-0.563702	-0.70574	-0.632974	0	12.5178	0.686281	2.415	1.455	3.115	1.27	4.75	-24.7888
-1	-5	-7	-7	3	Wt(-1,-5,-7,-7,3)	-0.328252	-0.563702	-0.70574	-0.632974	-2.73173e-17	12.5178	0.662045	2.415	1.455	3.115	1.27	4.75	-24.7888
-1	-5	-7	-7	5	Wt(-1,-5,-7,-7,5)	-0.328252	-0.563702	-0.70574	-0.632974	-2.73173e-17	12.5178	0.630293	2.415	1.455	3.115	1.27	4.75	-24.7888
-1	-5	-7	-7	7	Wt(-1,-5,-7,-7,7)	-0.328252	-0.563702	-0.70574	-0.632974	0	12.5178	0.594418	2.415	1.455	3.115	1.27	4.75	-24.7888
-1	-5	-7	-7	9	Wt(-1,-5,-7,-7,9)	-0.328252	-0.563702	-0.70574	-0.632974	-2.73173e-17	12.5178	0.55723	2.415	1.455	3.115	1.27	4.75	-24.7888
-1	-5	-7	-9	1	Wt(-1,-5,-7,-9,1)	-0.299106	-0.528484	-0.681193	-0.680404	0	13.8335	0.689614	2.415	1.455	3.115	1.27	4.75	-25.845
-1	-5	-7	-9	3	Wt(-1,-5,-7,-9,3)	-0.299106	-0.528484	-0.681193	-0.680404	-1.23595e-17	13.8335	0.669687	2.415	1.455	3.115	1.27	4.75	-25.845
-1	-5	-7	-9	5	Wt(-1,-5,-7,-9,5)	-0.299106	-0.528484	-0.681193	-0.680404	-3.70786e-17	13.8335	0.642812	2.415	1.455	3.115	1.27	4.75	-25.845
-1	-5	-7	-9	7	Wt(-1,-5,-7,-9,7)	-0.299106	-0.528484	-0.681193	-0.680404	1.23595e-17	13.8335	0.611558	2.415	1.455	3.115	1.27	4.75	-25.845
-1	-5	-7	-9	9	Wt(-1,-5,-7,-9,9)	-0.299106	-0.528484	-0.681193	-0.680404	-2.47191e-17	13.8335	0.578238	2.415	1.455	3.115	1.27	4.75	-25.845
-1	-5	-9	-1	1	Wt(-1,-5,-9,-1,1)	-0.403948	-0.631262	-0.778284	-0.369975	0	10.9348	0.673576	2.08	1.3	3.015	1.8	4.81	-24.897
-1	-5	-9	-1	3	Wt(-1,-5,-9,-1,3)	-0.403948	-0.631262	-0.778284	-0.369975	-3.12719e-17	10.9348	0.639824	2.08	1.3	3.015	1.8	4.81	-24.897
-1	-5	-9	-1	5	Wt(-1,-5,-9,-1,5)	-0.403948	-0.631262	-0.778284	-0.369975	-6.25438e-17	10.9348	0.59946	2.08	1.3	3.015	1.8	4.81	-24.897
-1	-5	-9	-1	7	Wt(-1,-5,-9,-1,7)	-0.403948	-0.631262	-0.778284	-0.369975	0	10.9348	0.556915	2.08	1.3	3.015	1.8	4.81	-24.897
-1	-5	-9	-1	9	Wt(-1,-5,-9,-1,9)	-0.403948	-0.631262	-0.778284	-0.369975	0	10.9348	0.515232	2.08	1.3	3.015	1.8	4.81	-24.897
-1	-5	-9	-3	1	Wt(-1,-5,-9,-3,1)	-0.377454	-0.607658	-0.77255	-0.46989	0	11.7784	0.678262	2.15	1.475	3.015	1.545	4.7	-26.4206
-1	-5	-9	-3	3	Wt(-1,-5,-9,-3,3)	-0.377454	-0.607658	-0.77255	-0.46989	0	11.7784	0.648774	2.15	1.475	3.015	1.545	4.7	-26.4206
-1	-5	-9	-3	5	Wt(-1,-5,-9,-3,5)	-0.377454	-0.607658	-0.77255	-0.46989	0	11.7784	0.612531	2.15	1.475	3.015	1.545	4.7	-26.4206
-1	-5	-9	-3	7	Wt(-1,-5,-9,-3,7)	-0.377454	-0.607658	-0.77255	-0.46989	2.90322e-17	11.7784	0.573339	2.15	1.475	3.015	1.545	4.7	-26.4206
-1	-5	-9	-3	9	Wt(-1,-5,-9,-3,9)	-0.377454	-0.607658	-0.77255	-0.46989	0	11.7784	0.53404	2.15	1.475	3.015	1.545	4.7	-26.4206
-1	-5	-9	-5	1	Wt(-1,-5,-9,-5,1)	-0.349563	-0.579029	-0.756892	-0.5487	-2.67145e-17	12.8002	0.682541	2.295	1.475	3.08	1.32	4.74	-27.6062
-1	-5	-9	-5	3	Wt(-1,-5,-9,-5,3)	-0.349563	-0.579029	-0.756892	-0.5487	-2.67145e-17	12.8002	0.657295	2.295	1.475	3.08	1.32	4.74	-27.6062
-1	-5	-9	-5	5	Wt(-1,-5,-9,-5,5)	-0.349563	-0.579029	-0.756892	-0.5487	-2.67145e-17	12.8002	0.625409	2.295	1.475	3.08	1.32	4.74	-27.6062
-1	-5	-9	-5	7	Wt(-1,-5,-9,-5,7)	-0.349563	-0.579029	-0.756892	-0.5487	-2.67145e-17	12.8002	0.590007	2.295	1.475	3.08	1.32	4.74	-27.6062
-1	-5	-9	-5	9	Wt(-1,-5,-9,-5,9)	-0.349563	-0.579029	-0.756892	-0.5487	-2.67145e-17	12.8002	0.553623	2.295	1.475	3.08	1.32	4.74	-27.6062
-1	-5	-9	-7	1	Wt(-1,-5,-9,-7,1)	-0.322547	-0.549104	-0.736135	-0.609716	-4.89856e-17	13.9613	0.686182	2.36	1.445	3.09	1.31	4.76	-28.7041
-1	-5	-9	-7	3	Wt(-1,-5,-9,-7,3)	-0.322547	-0.549104	-0.736135	-0.609716	-7.34785e-17	13.9613	0.664817	2.36	1.445	3.09	1.31	4.76	-28.7041
-1	-5	-9	-7	5	Wt(-1,-5,-9,-7,5)	-0.322547	-0.549104	-0.736135	-0.609716	2.44928e-17	13.9613	0.637134	2.36	1.445	3.09	1.31	4.76	-28.7041
-1	-5	-9	-7	7	Wt(-1,-5,-9,-7,7)	-0.322547	-0.549104	-0.736135	-0.609716	-7.34785e-17	13.9613	0.605617	2.36	1.445	3.09	1.31	4.76	-28.7041
-1	-5	-9	-7	9	Wt(-1,-5,-9,-7,9)	-0.322547	-0.549104	-0.736135	-0.609716	2.44928e-17	13.9613	0.572435	2.36	1.445	3.09	1.31	4.76	-28.7041
-1	-5	-9	-9	1	Wt(-1,-5,-9,-9,1)	-0.297567	-0.520081	-0.713498	-0.6567	0	15.2298	0.689159	2.415	1.455	3.115	1.27	4.75	-29.7731
-1	-5	-9	-9	3	Wt(-1,-5,-9,-9,3)	-0.297567	-0.520081	-0.713498	-0.6567	0	15.2298	0.671168	2.415	1.455	3.115	1.27	4.75	-29.7731
-1	-5	-9	-9	5	Wt(-1,-5,-9,-9,5)	-0.297567	-0.520081	-0.713498	-0.6567	-2.24529e-17	15.2298	0.64731	2.415	1.455	3.115	1.27	4.75	-29.7731
-1	-5	-9	-9	7	Wt(-1,-5,-9,-9,7)	-0.297567	-0.520081	-0.713498	-0.6567	0	15.2298	0.61952	2.415	1.455	3.115	1.27	4.75	-29.7731
-1	-5	-9	-9	9	Wt(-1,-5,-9,-9,9)	-0.297567	-0.520081	-0.713498	-0.6567	-2.24529e-17	15.2298	0.589597	2.415	1.455	3.115	1.27	4.75	-29.7731
-1	-7	-1	-1	1	Wt(-1,-7,-1,-1,1)	-0.509413	-0.83437	-0.471809	-0.273974	0	7.09579	0.670179	2.255	1.11	3.24	1.715	4.8	-11.0931
-1	-7	-1	-1	3	Wt(-1,-7,-1,-1,3)	-0.509413	-0.83437	-0.471809	-0.273974	2.40954e-17	7.09579	0.613629	2.255	1.11	3.24	1.715	4.8	-11.0931
-1	-7	-1	-1	5	Wt(-1,-7,-1,-1,5)	-0.509413	-0.83437	-0.471809	-0.273974	2.40954e-17	7.09579	0.548345	2.255	1.11	3.24	1.715	4.8	-11.0931
-1	-7	-1	-1	7	Wt(-1,-7,-1,-1,7)	-0.509413	-0.83437	-0.471809	-0.273974	0	7.09579	0.485842	2.255	1.11	3.24	1.715	4.8	-11.0931
-1	-7	-1	-1	9	Wt(-1,-7,-1,-1,9)	-0.509413	-0.83437	-0.471809	-0.273974	-2.40954e-17	7.09579	0.43081	2.255	1.11	3.24	1.715	4.8	-11.0931
-1	-7	-1	-3	1	Wt(-1,-7,-1,-3,1)	-0.466089	-0.789954	-0.503634	-0.439176	0	7.81693	0.676989	2.425	1.155	3.315	1.425	4.8	-12.4338
-1	-7	-1	-3	3	Wt(-1,-7,-1,-3,3)	-0.466089	-0.789954	-0.503634	-0.439176	-4.3745e-17	7.81693	0.629013	2.425	1.155	3.315	1.425	4.8	-12.4338
-1	-7	-1	-3	5	Wt(-1,-7,-1,-3,5)	-0.466089	-0.789954	-0.503634	-0.439176	-2.18725e-17	7.81693	0.570606	2.425	1.155	3.315	1.425	4.8	-12.4338
-1	-7	-1	-3	7	Wt(-1,-7,-1,-3,7)	-0.466089	-0.789954	-0.503634	-0.439176	0	7.81693	0.512074	2.425	1.155	3.315	1.425	4.8	-12.4338
-1	-7	-1	-3	9	Wt(-1,-7,-1,-3,9)	-0.466089	-0.789954	-0.503634	-0.439176	0	7.81693	0.458627	2.425	1.155	3.315	1.425	4.8	-12.4338
-1	-7	-1	-5	1	Wt(-1,-7,-1,-5,1)	-0.416277	-0.728867	-0.513066	-0.557966	-1.93823e-17	8.82124	0.683284	2.45	1.25	3.34	1.235	4.835	-13.5499
-1	-7	-1	-5	3	Wt(-1,-7,-1,-5,3)	-0.416277	-0.728867	-0.513066	-0.557966	1.93823e-17	8.82124	0.644587	2.45	1.25	3.34	1.235	4.835	-13.5499
-1	-7	-1	-5	5	Wt(-1,-7,-1,-5,5)	-0.416277	-0.728867	-0.513066	-0.557966	0	8.82124	0.594707	2.45	1.25	3.34	1.235	4.835	-13.5499
-1	-7	-1	-5	7	Wt(-1,-7,-1,-5,7)	-0.416277	-0.728867	-0.513066	-0.557966	-3.87646e-17	8.82124	0.542017	2.45	1.25	3.34	1.235	4.835	-13.5499
-1	-7	-1	-5	9	Wt(-1,-7,-1,-5,9)	-0.416277	-0.728867	-0.513066	-0.557966	-3.87646e-17	8.82124	0.491706	2.45	1.25	3.34	1.235	4.835	-13.5499
-1	-7	-1	-7	1	Wt(-1,-7,-1,-7,1)	-0.369193	-0.666802	-0.510265	-0.639557	0	10.024	0.688223	2.525	1.255	3.355	1.22	4.805	-14.5588
-1	-7	-1	-7	3	Wt(-1,-7,-1,-7,3)	-0.369193	-0.666802	-0.510265	-0.639557	3.41134e-17	10.024	0.65775	2.525	1.255	3.355	1.22	4.805	-14.5588
-1	-7	-1	-7	5	Wt(-1,-7,-1,-7,5)	-0.369193	-0.666802	-0.510265	-0.639557	0	10.024	0.616369	2.525	1.255	3.355	1.22	4.805	-14.5588
-1	-7	-1	-7	7	Wt(-1,-7,-1,-7,7)	-0.369193	-0.666802	-0.510265	-0.639557	-3.41134e-17	10.024	0.570394	2.525	1.255	3.355	1.22	4.805	-14.5588
-1	-7	-1	-7	9	Wt(-1,-7,-1,-7,9)	-0.369193	-0.666802	-0.510265	-0.639557	1.70567e-17	10.024	0.524454	2.525	1.255	3.355	1.22	4.805	-14.5588
-1	-7	-1	-9	1	Wt(-1,-7,-1,-9,1)	-0.328233	-0.610661	-0.502002	-0.695269	0	11.3623	0.691827	2.525	1.255	3.355	1.22	4.805	-15.5635
-1	-7	-1	-9	3	Wt(-1,-7,-1,-9,3)	-0.328233	-0.610661	-0.502002	-0.695269	0	11.3623	0.667972	2.525	1.255	3.355	1.22	4.805	-15.5635
-1	-7	-1	-9	5	Wt(-1,-7,-1,-9,5)	-0.328233	-0.610661	-0.502002	-0.695269	-1.50477e-17	11.3623	0.634106	2.525	1.255	3.355	1.22	4.805	-15.5635
-1	-7	-1	-9	7	Wt(-1,-7,-1,-9,7)	-0.328233	-0.610661	-0.502002	-0.695269	0	11.3623	0.594787	2.525	1.255	3.355	1.22	4.805	-15.5635
-1	-7	-1	-9	9	Wt(-1,-7,-1,-9,9)	-0.328233	-0.610661	-0.502002	-0.695269	0	11.3623	0.553828	2.525	1.255	3.355	1.22	4.805	-15.5635
-1	-7	-3	-1	1	Wt(-1,-7,-3,-1,1)	-0.491129	-0.800044	-0.586942	-0.310327	0	8.16259	0.670489	2.255	1.13	3.175	1.685	4.81	-15.1208
-1	-7	-3	-1	3	Wt(-1,-7,-3,-1,3)	-0.491129	-0.800044	-0.586942	-0.310327	0	8.16259	0.622297	2.255	1.13	3.175	1.685	4.81	-15.1208
-1	-7	-3	-1	5	Wt(-1,-7,-3,-1,5)	-0.491129	-0.800044	-0.586942	-0.310327	-4.18925e-17	8.16259	0.56595	2.255	1.13	3.175	1.685	4.81	-15.1208
-1	-7	-3	-1	7	Wt(-1,-7,-3,-1,7)	-0.491129	-0.800044	-0.586942	-0.310327	-2.09463e-17	8.16259	0.510058	2.255	1.13	3.175	1.685	4.81	-15.1208
-1	-7	-3	-1	9	Wt(-1,-7,-3,-1,9)	-0.491129	-0.800044	-0.586942	-0.310327	-4.18925e-17	8.16259	0.458955	2.255	1.13	3.175	1.685	4.81	-15.1208
-1	-7	-3	-3	1	Wt(-1,-7,-3,-3,1)	-0.452156	-0.759823	-0.602487	-0.450413	1.9147e-17	8.92962	0.676709	2.44	1.185	3.24	1.415	4.765	-16.521
-1	-7	-3	-3	3	Wt(-1,-7,-3,-3,3)	-0.452156	-0.759823	-0.602487	-0.450413	1.9147e-17	8.92962	0.635454	2.44	1.185	3.24	1.415	4.765	-16.521
-1	-7	-3	-3	5	Wt(-1,-7,-3,-3,5)	-0.452156	-0.759823	-0.602487	-0.450413	-1.9147e-17	8.92962	0.585083	2.44	1.185	3.24	1.415	4.765	-16.521
-1	-7	-3	-3	7	Wt(-1,-7,-3,-3,7)	-0.452156	-0.759823	-0.602487	-0.450413	0	8.92962	0.533154	2.44	1.185	3.24	1.415	4.765	-16.521
-1	-7	-3	-3	9	Wt(-1,-7,-3,-3,9)	-0.452156	-0.759823	-0.602487	-0.450413	0	8.92962	0.484117	2.44	1.185	3.24	1.415	4.765	-16.521
-1	-7	-3	-5	1	Wt(-1,-7,-3,-5,1)	-0.409081	-0.70819	-0.6005	-0.554422	0	9.94002	0.682415	2.445	1.245	3.25	1.3	4.815	-17.7045
-1	-7	-3	-5	3	Wt(-1,-7,-3,-5,3)	-0.409081	-0.70819	-0.6005	-0.554422	-3.44015e-17	9.94002	0.648403	2.445	1.245	3.25	1.3	4.815	-17.7045
-1	-7	-3	-5	5	Wt(-1,-7,-3,-5,5)	-0.409081	-0.70819	-0.6005	-0.554422	-3.44015e-17	9.94002	0.604962	2.445	1.245	3.25	1.3	4.815	-17.7045
-1	-7	-3	-5	7	Wt(-1,-7,-3,-5,7)	-0.409081	-0.70819	-0.6005	-0.554422	-1.72007e-17	9.94002	0.558237	2.445	1.245	3.25	1.3	4.815	-17.7045
-1	-7	-3	-5	9	Wt(-1,-7,-3,-5,9)	-0.409081	-0.70819	-0.6005	-0.554422	0	9.94002	0.512439	2.445	1.245	3.25	1.3	4.815	-17.7045
-1	-7	-3	-7	1	Wt(-1,-7,-3,-7,1)	-0.367998	-0.655474	-0.589339	-0.629052	1.53649e-17	11.1277	0.687036	2.525	1.255	3.355	1.22	4.805	-18.7329
-1	-7	-3	-7	3	Wt(-1,-7,-3,-7,3)	-0.367998	-0.655474	-0.589339	-0.629052	0	11.1277	0.659526	2.525	1.255	3.355	1.22	4.805	-18.7329
-1	-7	-3	-7	5	Wt(-1,-7,-3,-7,5)	-0.367998	-0.655474	-0.589339	-0.629052	0	11.1277	0.622899	2.525	1.255	3.355	1.22	4.805	-18.7329
-1	-7	-3	-7	7	Wt(-1,-7,-3,-7,7)	-0.367998	-0.655474	-0.589339	-0.629052	-1.53649e-17	11.1277	0.581877	2.525	1.255	3.355	1.22	4.805	-18.7329
-1	-7	-3	-7	9	Wt(-1,-7,-3,-7,9)	-0.367998	-0.655474	-0.589339	-0.629052	-3.07297e-17	11.1277	0.540139	2.525	1.255	3.355	1.22	4.805	-18.7329
-1	-7	-3	-9	1	Wt(-1,-7,-3,-9,1)	-0.331431	-0.606689	-0.574425	-0.682274	-2.74837e-17	12.442	0.690558	2.525	1.255	3.355	1.22	4.805	-19.7376
-1	-7	-3	-9	3	Wt(-1,-7,-3,-9,3)	-0.331431	-0.606689	-0.574425	-0.682274	-2.74837e-17	12.442	0.668438	2.525	1.255	3.355	1.22	4.805	-19.7376
-1	-7	-3	-9	5	Wt(-1,-7,-3,-9,5)	-0.331431	-0.606689	-0.574425	-0.682274	0	12.442	0.637904	2.525	1.255	3.355	1.22	4.805	-19.7376
-1	-7	-3	-9	7	Wt(-1,-7,-3,-9,7)	-0.331431	-0.606689	-0.574425	-0.682274	-1.37418e-17	12.442	0.602458	2.525	1.255	3.355	1.22	4.805	-19.7376
-1	-7	-3	-9	9	Wt(-1,-7,-3,-9,9)	-0.331431	-0.606689	-0.574425	-0.682274	-4.12255e-17	12.442	0.56513	2.525	1.255	3.355	1.22	4.805	-19.7376
-1	-7	-5	-1	1	Wt(-1,-7,-5,-1,1)	-0.467572	-0.758248	-0.662009	-0.33154	-3.63125e-17	9.4169	0.671871	2.255	1.13	3.175	1.685	4.81	-19.1184
-1	-7	-5	-1	3	Wt(-1,-7,-5,-1,3)	-0.467572	-0.758248	-0.662009	-0.33154	-3.63125e-17	9.4169	0.631282	2.255	1.13	3.175	1.685	4.81	-19.1184
-1	-7	-5	-1	5	Wt(-1,-7,-5,-1,5)	-0.467572	-0.758248	-0.662009	-0.33154	-3.63125e-17	9.4169	0.58321	2.255	1.13	3.175	1.685	4.81	-19.1184
-1	-7	-5	-1	7	Wt(-1,-7,-5,-1,7)	-0.467572	-0.758248	-0.662009	-0.33154	-3.63125e-17	9.4169	0.533957	2.255	1.13	3.175	1.685	4.81	-19.1184
-1	-7	-5	-1	9	Wt(-1,-7,-5,-1,9)	-0.467572	-0.758248	-0.662009	-0.33154	-7.26251e-17	9.4169	0.487282	2.255	1.13	3.175	1.685	4.81	-19.1184
-1	-7	-5	-3	1	Wt(-1,-7,-5,-3,1)	-0.43427	-0.724622	-0.668595	-0.451835	-3.35079e-17	10.2051	0.677249	2.265	1.18	3.175	1.565	4.775	-20.5429
-1	-7	-5	-3	3	Wt(-1,-7,-5,-3,3)	-0.43427	-0.724622	-0.668595	-0.451835	0	10.2051	0.642057	2.265	1.18	3.175	1.565	4.775	-20.5429
-1	-7	-5	-3	5	Wt(-1,-7,-5,-3,5)	-0.43427	-0.724622	-0.668595	-0.451835	-3.35079e-17	10.2051	0.598928	2.265	1.18	3.175	1.565	4.775	-20.5429
-1	-7	-5	-3	7	Wt(-1,-7,-5,-3,7)	-0.43427	-0.724622	-0.668595	-0.451835	-6.70158e-17	10.2051	0.553335	2.265	1.18	3.175	1.565	4.775	-20.5429
-1	-7	-5	-3	9	Wt(-1,-7,-5,-3,9)	-0.43427	-0.724622	-0.668595	-0.451835	-3.35079e-17	10.2051	0.508935	2.265	1.18	3.175	1.565	4.775	-20.5429
-1	-7	-5	-5	1	Wt(-1,-7,-5,-5,1)	-0.398056	-0.682634	-0.661461	-0.544366	0	11.2056	0.68221	2.345	1.24	3.185	1.415	4.74	-21.7541
-1	-7	-5	-5	3	Wt(-1,-7,-5,-5,3)	-0.398056	-0.682634	-0.661461	-0.544366	0	11.2056	0.652563	2.345	1.24	3.185	1.415	4.74	-21.7541
-1	-7	-5	-5	5	Wt(-1,-7,-5,-5,5)	-0.398056	-0.682634	-0.661461	-0.544366	-3.0516e-17	11.2056	0.614932	2.345	1.24	3.185	1.415	4.74	-21.7541
-1	-7	-5	-5	7	Wt(-1,-7,-5,-5,7)	-0.398056	-0.682634	-0.661461	-0.544366	-3.0516e-17	11.2056	0.573799	2.345	1.24	3.185	1.415	4.74	-21.7541
-1	-7	-5	-5	9	Wt(-1,-7,-5,-5,9)	-0.398056	-0.682634	-0.661461	-0.544366	-3.0516e-17	11.2056	0.532509	2.345	1.24	3.185	1.415	4.74	-21.7541
-1	-7	-5	-7	1	Wt(-1,-7,-5,-7,1)	-0.362994	-0.639105	-0.646969	-0.61364	0	12.367	0.686361	2.425	1.305	3.21	1.285	4.76	-22.8516
-1	-7	-5	-7	3	Wt(-1,-7,-5,-7,3)	-0.362994	-0.639105	-0.646969	-0.61364	2.76502e-17	12.367	0.661775	2.425	1.305	3.21	1.285	4.76	-22.8516
-1	-7	-5	-7	5	Wt(-1,-7,-5,-7,5)	-0.362994	-0.639105	-0.646969	-0.61364	-2.76502e-17	12.367	0.62953	2.425	1.305	3.21	1.285	4.76	-22.8516
-1	-7	-5	-7	7	Wt(-1,-7,-5,-7,7)	-0.362994	-0.639105	-0.646969	-0.61364	0	12.367	0.593135	2.425	1.305	3.21	1.285	4.76	-22.8516
-1	-7	-5	-7	9	Wt(-1,-7,-5,-7,9)	-0.362994	-0.639105	-0.646969	-0.61364	2.76502e-17	12.367	0.555482	2.425	1.305	3.21	1.285	4.76	-22.8516
-1	-7	-5	-9	1	Wt(-1,-7,-5,-9,1)	-0.331019	-0.597752	-0.629388	-0.665125	-2.50544e-17	13.6483	0.689657	2.47	1.29	3.285	1.235	4.8	-23.8948
-1	-7	-5	-9	3	Wt(-1,-7,-5,-9,3)	-0.331019	-0.597752	-0.629388	-0.665125	0	13.6483	0.669394	2.47	1.29	3.285	1.235	4.8	-23.8948
-1	-7	-5	-9	5	Wt(-1,-7,-5,-9,5)	-0.331019	-0.597752	-0.629388	-0.665125	0	13.6483	0.642031	2.47	1.29	3.285	1.235	4.8	-23.8948
-1	-7	-5	-9	7	Wt(-1,-7,-5,-9,7)	-0.331019	-0.597752	-0.629388	-0.665125	-3.75816e-17	13.6483	0.610239	2.47	1.29	3.285	1.235	4.8	-23.8948
-1	-7	-5	-9	9	Wt(-1,-7,-5,-9,9)	-0.331019	-0.597752	-0.629388	-0.665125	-3.75816e-17	13.6483	0.576412	2.47	1.29	3.285	1.235	4.8	-23.8948
-1	-7	-7	-1	1	Wt(-1,-7,-7,-1,1)	-0.444458	-0.718047	-0.711276	-0.343825	0	10.7935	0.673522	2.155	1.17	3.1	1.825	4.855	-23.0741
-1	-7	-7	-1	3	Wt(-1,-7,-7,-1,3)	-0.444458	-0.718047	-0.711276	-0.343825	0	10.7935	0.639219	2.155	1.17	3.1	1.825	4.855	-23.0741
-1	-7	-7	-1	5	Wt(-1,-7,-7,-1,5)	-0.444458	-0.718047	-0.711276	-0.343825	-3.16811e-17	10.7935	0.598216	2.155	1.17	3.1	1.825	4.855	-23.0741
-1	-7	-7	-1	7	Wt(-1,-7,-7,-1,7)	-0.444458	-0.718047	-0.711276	-0.343825	0	10.7935	0.555093	2.155	1.17	3.1	1.825	4.855	-23.0741
-1	-7	-7	-1	9	Wt(-1,-7,-7,-1,9)	-0.444458	-0.718047	-0.711276	-0.343825	0	10.7935	0.512956	2.155	1.17	3.1	1.825	4.855	-23.0741
-1	-7	-7	-3	1	Wt(-1,-7,-7,-3,1)	-0.416399	-0.690675	-0.713232	-0.448674	-2.95046e-17	11.5898	0.678094	2.185	1.205	3.125	1.625	4.795	-24.5227
-1	-7	-7	-3	3	Wt(-1,-7,-7,-3,3)	-0.416399	-0.690675	-0.713232	-0.448674	0	11.5898	0.64796	2.185	1.205	3.125	1.625	4.795	-24.5227
-1	-7	-7	-3	5	Wt(-1,-7,-7,-3,5)	-0.416399	-0.690675	-0.713232	-0.448674	0	11.5898	0.61096	2.185	1.205	3.125	1.625	4.795	-24.5227
-1	-7	-7	-3	7	Wt(-1,-7,-7,-3,7)	-0.416399	-0.690675	-0.713232	-0.448674	-2.95046e-17	11.5898	0.571058	2.185	1.205	3.125	1.625	4.795	-24.5227
-1	-7	-7	-3	9	Wt(-1,-7,-7,-3,9)	-0.416399	-0.690675	-0.713232	-0.448674	-2.95046e-17	11.5898	0.53118	2.185	1.205	3.125	1.625	4.795	-24.5227
-1	-7	-7	-5	1	Wt(-1,-7,-7,-5,1)	-0.386093	-0.656862	-0.704257	-0.531977	-2.71955e-17	12.5738	0.682353	2.345	1.24	3.185	1.415	4.74	-25.749
-1	-7	-7	-5	3	Wt(-1,-7,-7,-5,3)	-0.386093	-0.656862	-0.704257	-0.531977	-2.71955e-17	12.5738	0.656472	2.345	1.24	3.185	1.415	4.74	-25.749
-1	-7	-7	-5	5	Wt(-1,-7,-7,-5,5)	-0.386093	-0.656862	-0.704257	-0.531977	-2.71955e-17	12.5738	0.623809	2.345	1.24	3.185	1.415	4.74	-25.749
-1	-7	-7	-5	7	Wt(-1,-7,-7,-5,7)	-0.386093	-0.656862	-0.704257	-0.531977	-2.71955e-17	12.5738	0.587646	2.345	1.24	3.185	1.415	4.74	-25.749
-1	-7	-7	-5	9	Wt(-1,-7,-7,-5,9)	-0.386093	-0.656862	-0.704257	-0.531977	-2.71955e-17	12.5738	0.550608	2.345	1.24	3.185	1.415	4.74	-25.749
-1	-7	-7	-7	1	Wt(-1,-7,-7,-7,1)	-0.356313	-0.621203	-0.689093	-0.596699	0	13.7053	0.68602	2.425	1.305	3.21	1.285	4.76	-26.8749
-1	-7	-7	-7	3	Wt(-1,-7,-7,-7,3)	-0.356313	-0.621203	-0.689093	-0.596699	0	13.7053	0.664086	2.425	1.305	3.21	1.285	4.76	-26.8749
-1	-7	-7	-7	5	Wt(-1,-7,-7,-7,5)	-0.356313	-0.621203	-0.689093	-0.596699	0	13.7053	0.635676	2.425	1.305	3.21	1.285	4.76	-26.8749
-1	-7	-7	-7	7	Wt(-1,-7,-7,-7,7)	-0.356313	-0.621203	-0.689093	-0.596699	-2.49504e-17	13.7053	0.603409	2.425	1.305	3.21	1.285	4.76	-26.8749
-1	-7	-7	-7	9	Wt(-1,-7,-7,-7,9)	-0.356313	-0.621203	-0.689093	-0.596699	-2.49504e-17	13.7053	0.569548	2.425	1.305	3.21	1.285	4.76	-26.8749
-1	-7	-7	-9	1	Wt(-1,-7,-7,-9,1)	-0.32855	-0.586477	-0.671085	-0.646582	0	14.9507	0.689038	2.425	1.305	3.21	1.285	4.76	-27.9454
-1	-7	-7	-9	3	Wt(-1,-7,-7,-9,3)	-0.32855	-0.586477	-0.671085	-0.646582	0	14.9507	0.670564	2.425	1.305	3.21	1.285	4.76	-27.9454
-1	-7	-7	-9	5	Wt(-1,-7,-7,-9,5)	-0.32855	-0.586477	-0.671085	-0.646582	0	14.9507	0.646061	2.425	1.305	3.21	1.285	4.76	-27.9454
-1	-7	-7	-9	7	Wt(-1,-7,-7,-9,7)	-0.32855	-0.586477	-0.671085	-0.646582	2.28719e-17	14.9507	0.617575	2.425	1.305	3.21	1.285	4.76	-27.9454
-1	-7	-7	-9	9	Wt(-1,-7,-7,-9,9)	-0.32855	-0.586477	-0.671085	-0.646582	-2.28719e-17	14.9507	0.58699	2.425	1.305	3.21	1.285	4.76	-27.9454
-1	-7	-9	-1	1	Wt(-1,-7,-9,-1,1)	-0.423747	-0.682389	-0.744432	-0.350989	0	12.2513	0.67511	2.105	1.29	3.02	2.01	4.74	-26.9597
-1	-7	-9	-1	3	Wt(-1,-7,-9,-1,3)	-0.423747	-0.682389	-0.744432	-0.350989	-2.79113e-17	12.2513	0.645833	2.105	1.29	3.02	2.01	4.74	-26.9597
-1	-7	-9	-1	5	Wt(-1,-7,-9,-1,5)	-0.423747	-0.682389	-0.744432	-0.350989	-2.79113e-17	12.2513	0.610655	2.105	1.29	3.02	2.01	4.74	-26.9597
-1	-7	-9	-1	7	Wt(-1,-7,-9,-1,7)	-0.423747	-0.682389	-0.744432	-0.350989	0	12.2513	0.572915	2.105	1.29	3.02	2.01	4.74	-26.9597
-1	-7	-9	-1	9	Wt(-1,-7,-9,-1,9)	-0.423747	-0.682389	-0.744432	-0.350989	-5.58227e-17	12.2513	0.53511	2.105	1.29	3.02	2.01	4.74	-26.9597
-1	-7	-9	-3	1	Wt(-1,-7,-9,-3,1)	-0.400046	-0.660184	-0.74407	-0.443642	-2.62054e-17	13.0489	0.678999	2.245	1.22	3.1	1.625	4.8	-28.4465
-1	-7	-9	-3	3	Wt(-1,-7,-9,-3,3)	-0.400046	-0.660184	-0.74407	-0.443642	-2.62054e-17	13.0489	0.652969	2.245	1.22	3.1	1.625	4.8	-28.4465
-1	-7	-9	-3	5	Wt(-1,-7,-9,-3,5)	-0.400046	-0.660184	-0.74407	-0.443642	0	13.0489	0.621016	2.245	1.22	3.1	1.625	4.8	-28.4465
-1	-7	-9	-3	7	Wt(-1,-7,-9,-3,7)	-0.400046	-0.660184	-0.74407	-0.443642	-2.62054e-17	13.0489	0.586039	2.245	1.22	3.1	1.625	4.8	-28.4465
-1	-7	-9	-3	9	Wt(-1,-7,-9,-3,9)	-0.400046	-0.660184	-0.74407	-0.443642	0	13.0489	0.550345	2.245	1.22	3.1	1.625	4.8	-28.4465
-1	-7	-9	-5	1	Wt(-1,-7,-9,-5,1)	-0.374529	-0.632854	-0.734829	-0.519316	-2.43997e-17	14.0146	0.682658	2.29	1.285	3.15	1.425	4.725	-29.7206
-1	-7	-9	-5	3	Wt(-1,-7,-9,-5,3)	-0.374529	-0.632854	-0.734829	-0.519316	-2.43997e-17	14.0146	0.659929	2.29	1.285	3.15	1.425	4.725	-29.7206
-1	-7	-9	-5	5	Wt(-1,-7,-9,-5,5)	-0.374529	-0.632854	-0.734829	-0.519316	0	14.0146	0.631414	2.29	1.285	3.15	1.425	4.725	-29.7206
-1	-7	-9	-5	7	Wt(-1,-7,-9,-5,7)	-0.374529	-0.632854	-0.734829	-0.519316	-2.43997e-17	14.0146	0.59954	2.29	1.285	3.15	1.425	4.725	-29.7206
-1	-7	-9	-5	9	Wt(-1,-7,-9,-5,9)	-0.374529	-0.632854	-0.734829	-0.519316	-2.43997e-17	14.0146	0.566362	2.29	1.285	3.15	1.425	4.725	-29.7206
-1	-7	-9	-7	1	Wt(-1,-7,-9,-7,1)	-0.349134	-0.603572	-0.720244	-0.579972	-2.26216e-17	15.1161	0.685886	2.315	1.34	3.15	1.335	4.755	-30.8641
-1	-7	-9	-7	3	Wt(-1,-7,-9,-7,3)	-0.349134	-0.603572	-0.720244	-0.579972	-4.52432e-17	15.1161	0.666264	2.315	1.34	3.15	1.335	4.755	-30.8641
-1	-7	-9	-7	5	Wt(-1,-7,-9,-7,5)	-0.349134	-0.603572	-0.720244	-0.579972	-2.26216e-17	15.1161	0.641129	2.315	1.34	3.15	1.335	4.755	-30.8641
-1	-7	-9	-7	7	Wt(-1,-7,-9,-7,7)	-0.349134	-0.603572	-0.720244	-0.579972	-2.26216e-17	15.1161	0.612454	2.315	1.34	3.15	1.335	4.755	-30.8641
-1	-7	-9	-7	9	Wt(-1,-7,-9,-7,9)	-0.349134	-0.603572	-0.720244	-0.579972	0	15.1161	0.58201	2.315	1.34	3.15	1.335	4.755	-30.8641
-1	-7	-9	-9	1	Wt(-1,-7,-9,-9,1)	-0.325016	-0.574426	-0.702941	-0.628187	0	16.3261	0.688622	2.34	1.34	3.165	1.31	4.765	-31.9656
-1	-7	-9	-9	3	Wt(-1,-7,-9,-9,3)	-0.325016	-0.574426	-0.702941	-0.628187	0	16.3261	0.671785	2.34	1.34	3.165	1.31	4.765	-31.9656
-1	-7	-9	-9	5	Wt(-1,-7,-9,-9,5)	-0.325016	-0.574426	-0.702941	-0.628187	-2.0945e-17	16.3261	0.649795	2.34	1.34	3.165	1.31	4.765	-31.9656
-1	-7	-9	-9	7	Wt(-1,-7,-9,-9,7)	-0.325016	-0.574426	-0.702941	-0.628187	-2.0945e-17	16.3261	0.624227	2.34	1.34	3.165	1.31	4.765	-31.9656
-1	-7	-9	-9	9	Wt(-1,-7,-9,-9,9)	-0.325016	-0.574426	-0.702941	-0.628187	-4.189e-17	16.3261	0.59657	2.34	1.34	3.165	1.31	4.765	-31.9656
-1	-9	-1	-1	1	Wt(-1,-9,-1,-1,1)	-0.500352	-0.841087	-0.451185	-0.250635	0	8.77196	0.675221	2.36	1.09	3.32	1.665	4.815	-12.9614
-1	-9	-1	-1	3	Wt(-1,-9,-1,-1,3)	-0.500352	-0.841087	-0.451185	-0.250635	-1.94912e-17	8.77196	0.632431	2.36	1.09	3.32	1.665	4.815	-12.9614
-1	-9	-1	-1	5	Wt(-1,-9,-1,-1,5)	-0.500352	-0.841087	-0.451185	-0.250635	1.94912e-17	8.77196	0.580791	2.36	1.09	3.32	1.665	4.815	-12.9614
-1	-9	-1	-1	7	Wt(-1,-9,-1,-1,7)	-0.500352	-0.841087	-0.451185	-0.250635	0	8.77196	0.528041	2.36	1.09	3.32	1.665	4.815	-12.9614
-1	-9	-1	-1	9	Wt(-1,-9,-1,-1,9)	-0.500352	-0.841087	-0.451185	-0.250635	0	8.77196	0.478591	2.36	1.09	3.32	1.665	4.815	-12.9614
-1	-9	-1	-3	1	Wt(-1,-9,-1,-3,1)	-0.469022	-0.810319	-0.48272	-0.391493	0	9.41909	0.679803	2.455	1.145	3.33	1.44	4.795	-14.35
-1	-9	-1	-3	3	Wt(-1,-9,-1,-3,3)	-0.469022	-0.810319	-0.48272	-0.391493	0	9.41909	0.642246	2.455	1.145	3.33	1.44	4.795	-14.35
-1	-9	-1	-3	5	Wt(-1,-9,-1,-3,5)	-0.469022	-0.810319	-0.48272	-0.391493	1.8152e-17	9.41909	0.595337	2.455	1.145	3.33	1.44	4.795	-14.35
-1	-9	-1	-3	7	Wt(-1,-9,-1,-3,7)	-0.469022	-0.810319	-0.48272	-0.391493	1.8152e-17	9.41909	0.545936	2.455	1.145	3.33	1.44	4.795	-14.35
-1	-9	-1	-3	9	Wt(-1,-9,-1,-3,9)	-0.469022	-0.810319	-0.48272	-0.391493	0	9.41909	0.498411	2.455	1.145	3.33	1.44	4.795	-14.35
-1	-9	-1	-5	1	Wt(-1,-9,-1,-5,1)	-0.43097	-0.764439	-0.497783	-0.501724	-4.97151e-17	10.3173	0.684319	2.5	1.2	3.355	1.31	4.775	-15.5135
-1	-9	-1	-5	3	Wt(-1,-9,-1,-5,3)	-0.43097	-0.764439	-0.497783	-0.501724	-3.31434e-17	10.3173	0.652632	2.5	1.2	3.355	1.31	4.775	-15.5135
-1	-9	-1	-5	5	Wt(-1,-9,-1,-5,5)	-0.43097	-0.764439	-0.497783	-0.501724	-1.65717e-17	10.3173	0.611524	2.5	1.2	3.355	1.31	4.775	-15.5135
-1	-9	-1	-5	7	Wt(-1,-9,-1,-5,7)	-0.43097	-0.764439	-0.497783	-0.501724	-3.31434e-17	10.3173	0.566665	2.5	1.2	3.355	1.31	4.775	-15.5135
-1	-9	-1	-5	9	Wt(-1,-9,-1,-5,9)	-0.43097	-0.764439	-0.497783	-0.501724	-3.31434e-17	10.3173	0.522123	2.5	1.2	3.355	1.31	4.775	-15.5135
-1	-9	-1	-7	1	Wt(-1,-9,-1,-7,1)	-0.392299	-0.713695	-0.501845	-0.5843	0	11.4075	0.688192	2.525	1.255	3.355	1.22	4.805	-16.5789
-1	-9	-1	-7	3	Wt(-1,-9,-1,-7,3)	-0.392299	-0.713695	-0.501845	-0.5843	-1.4988e-17	11.4075	0.662072	2.525	1.255	3.355	1.22	4.805	-16.5789
-1	-9	-1	-7	5	Wt(-1,-9,-1,-7,5)	-0.392299	-0.713695	-0.501845	-0.5843	0	11.4075	0.626917	2.525	1.255	3.355	1.22	4.805	-16.5789
-1	-9	-1	-7	7	Wt(-1,-9,-1,-7,7)	-0.392299	-0.713695	-0.501845	-0.5843	-2.9976e-17	11.4075	0.587165	2.525	1.255	3.355	1.22	4.805	-16.5789
-1	-9	-1	-7	9	Wt(-1,-9,-1,-7,9)	-0.392299	-0.713695	-0.501845	-0.5843	1.4988e-17	11.4075	0.546369	2.525	1.255	3.355	1.22	4.805	-16.5789
-1	-9	-1	-9	1	Wt(-1,-9,-1,-9,1)	-0.356316	-0.664236	-0.499509	-0.64512	2.70531e-17	12.64	0.691275	2.525	1.255	3.355	1.22	4.805	-17.5836
-1	-9	-1	-9	3	Wt(-1,-9,-1,-9,3)	-0.356316	-0.664236	-0.499509	-0.64512	0	12.64	0.669966	2.525	1.255	3.355	1.22	4.805	-17.5836
-1	-9	-1	-9	5	Wt(-1,-9,-1,-9,5)	-0.356316	-0.664236	-0.499509	-0.64512	0	12.64	0.640316	2.525	1.255	3.355	1.22	4.805	-17.5836
-1	-9	-1	-9	7	Wt(-1,-9,-1,-9,7)	-0.356316	-0.664236	-0.499509	-0.64512	-5.41061e-17	12.64	0.605676	2.525	1.255	3.355	1.22	4.805	-17.5836
-1	-9	-1	-9	9	Wt(-1,-9,-1,-9,9)	-0.356316	-0.664236	-0.499509	-0.64512	0	12.64	0.568991	2.525	1.255	3.355	1.22	4.805	-17.5836
-1	-9	-3	-1	1	Wt(-1,-9,-3,-1,1)	-0.489045	-0.816689	-0.552191	-0.285003	0	9.78082	0.674631	2.285	1.12	3.19	1.7	4.805	-17.0127
-1	-9	-3	-1	3	Wt(-1,-9,-3,-1,3)	-0.489045	-0.816689	-0.552191	-0.285003	3.49614e-17	9.78082	0.636633	2.285	1.12	3.19	1.7	4.805	-17.0127
-1	-9	-3	-1	5	Wt(-1,-9,-3,-1,5)	-0.489045	-0.816689	-0.552191	-0.285003	3.49614e-17	9.78082	0.590887	2.285	1.12	3.19	1.7	4.805	-17.0127
-1	-9	-3	-1	7	Wt(-1,-9,-3,-1,7)	-0.489045	-0.816689	-0.552191	-0.285003	3.49614e-17	9.78082	0.543314	2.285	1.12	3.19	1.7	4.805	-17.0127
-1	-9	-3	-1	9	Wt(-1,-9,-3,-1,9)	-0.489045	-0.816689	-0.552191	-0.285003	0	9.78082	0.49765	2.285	1.12	3.19	1.7	4.805	-17.0127
-1	-9	-3	-3	1	Wt(-1,-9,-3,-3,1)	-0.459235	-0.786623	-0.571653	-0.408134	0	10.4782	0.679065	2.365	1.125	3.225	1.6	4.79	-18.4397
-1	-9	-3	-3	3	Wt(-1,-9,-3,-3,3)	-0.459235	-0.786623	-0.571653	-0.408134	0	10.4782	0.64558	2.365	1.125	3.225	1.6	4.79	-18.4397
-1	-9	-3	-3	5	Wt(-1,-9,-3,-3,5)	-0.459235	-0.786623	-0.571653	-0.408134	0	10.4782	0.604059	2.365	1.125	3.225	1.6	4.79	-18.4397
-1	-9	-3	-3	7	Wt(-1,-9,-3,-3,7)	-0.459235	-0.786623	-0.571653	-0.408134	0	10.4782	0.559702	2.365	1.125	3.225	1.6	4.79	-18.4397
-1	-9	-3	-3	9	Wt(-1,-9,-3,-3,9)	-0.459235	-0.786623	-0.571653	-0.408134	0	10.4782	0.516111	2.365	1.125	3.225	1.6	4.79	-18.4397
-1	-9	-3	-5	1	Wt(-1,-9,-3,-5,1)	-0.424755	-0.74558	-0.577282	-0.505904	0	11.3963	0.683357	2.495	1.195	3.265	1.375	4.755	-19.6637
-1	-9	-3	-5	3	Wt(-1,-9,-3,-5,3)	-0.424755	-0.74558	-0.577282	-0.505904	-3.00054e-17	11.3963	0.654745	2.495	1.195	3.265	1.375	4.755	-19.6637
-1	-9	-3	-5	5	Wt(-1,-9,-3,-5,5)	-0.424755	-0.74558	-0.577282	-0.505904	-3.00054e-17	11.3963	0.618126	2.495	1.195	3.265	1.375	4.755	-19.6637
-1	-9	-3	-5	7	Wt(-1,-9,-3,-5,7)	-0.424755	-0.74558	-0.577282	-0.505904	3.00054e-17	11.3963	0.577817	2.495	1.195	3.265	1.375	4.755	-19.6637
-1	-9	-3	-5	9	Wt(-1,-9,-3,-5,9)	-0.424755	-0.74558	-0.577282	-0.505904	-3.00054e-17	11.3963	0.537108	2.495	1.195	3.265	1.375	4.755	-19.6637
-1	-9	-3	-7	1	Wt(-1,-9,-3,-7,1)	-0.389964	-0.700859	-0.574046	-0.580973	1.36927e-17	12.4866	0.687082	2.45	1.25	3.34	1.235	4.835	-20.7531
-1	-9	-3	-7	3	Wt(-1,-9,-3,-7,3)	-0.389964	-0.700859	-0.574046	-0.580973	-1.36927e-17	12.4866	0.663086	2.45	1.25	3.34	1.235	4.835	-20.7531
-1	-9	-3	-7	5	Wt(-1,-9,-3,-7,5)	-0.389964	-0.700859	-0.574046	-0.580973	-4.10781e-17	12.4866	0.631421	2.45	1.25	3.34	1.235	4.835	-20.7531
-1	-9	-3	-7	7	Wt(-1,-9,-3,-7,7)	-0.389964	-0.700859	-0.574046	-0.580973	-2.73854e-17	12.4866	0.595515	2.45	1.25	3.34	1.235	4.835	-20.7531
-1	-9	-3	-7	9	Wt(-1,-9,-3,-7,9)	-0.389964	-0.700859	-0.574046	-0.580973	0	12.4866	0.558224	2.45	1.25	3.34	1.235	4.835	-20.7531
-1	-9	-3	-9	1	Wt(-1,-9,-3,-9,1)	-0.35731	-0.656975	-0.565864	-0.637824	-2.49452e-17	13.7081	0.690122	2.525	1.255	3.355	1.22	4.805	-21.7578
-1	-9	-3	-9	3	Wt(-1,-9,-3,-9,3)	-0.35731	-0.656975	-0.565864	-0.637824	0	13.7081	0.670175	2.525	1.255	3.355	1.22	4.805	-21.7578
-1	-9	-3	-9	5	Wt(-1,-9,-3,-9,5)	-0.35731	-0.656975	-0.565864	-0.637824	-3.74178e-17	13.7081	0.643109	2.525	1.255	3.355	1.22	4.805	-21.7578
-1	-9	-3	-9	7	Wt(-1,-9,-3,-9,7)	-0.35731	-0.656975	-0.565864	-0.637824	0	13.7081	0.611565	2.525	1.255	3.355	1.22	4.805	-21.7578
-1	-9	-3	-9	9	Wt(-1,-9,-3,-9,9)	-0.35731	-0.656975	-0.565864	-0.637824	-2.49452e-17	13.7081	0.577921	2.525	1.255	3.355	1.22	4.805	-21.7578
-1	-9	-5	-1	1	Wt(-1,-9,-5,-1,1)	-0.472331	-0.784365	-0.624367	-0.30804	0	10.9615	0.674957	2.255	1.13	3.175	1.685	4.81	-21.0159
-1	-9	-5	-1	3	Wt(-1,-9,-5,-1,3)	-0.472331	-0.784365	-0.624367	-0.30804	-3.11957e-17	10.9615	0.641674	2.255	1.13	3.175	1.685	4.81	-21.0159
-1	-9	-5	-1	5	Wt(-1,-9,-5,-1,5)	-0.472331	-0.784365	-0.624367	-0.30804	3.11957e-17	10.9615	0.601583	2.255	1.13	3.175	1.685	4.81	-21.0159
-1	-9	-5	-1	7	Wt(-1,-9,-5,-1,7)	-0.472331	-0.784365	-0.624367	-0.30804	0	10.9615	0.559143	2.255	1.13	3.175	1.685	4.81	-21.0159
-1	-9	-5	-1	9	Wt(-1,-9,-5,-1,9)	-0.472331	-0.784365	-0.624367	-0.30804	0	10.9615	0.517446	2.255	1.13	3.175	1.685	4.81	-21.0159
-1	-9	-5	-3	1	Wt(-1,-9,-5,-3,1)	-0.44538	-0.757304	-0.635883	-0.416239	-2.92535e-17	11.6892	0.679028	2.27	1.155	3.175	1.625	4.775	-22.464
-1	-9	-5	-3	3	Wt(-1,-9,-5,-3,3)	-0.44538	-0.757304	-0.635883	-0.416239	0	11.6892	0.649488	2.27	1.155	3.175	1.625	4.775	-22.464
-1	-9	-5	-3	5	Wt(-1,-9,-5,-3,5)	-0.44538	-0.757304	-0.635883	-0.416239	2.92535e-17	11.6892	0.613016	2.27	1.155	3.175	1.625	4.775	-22.464
-1	-9	-5	-3	7	Wt(-1,-9,-5,-3,7)	-0.44538	-0.757304	-0.635883	-0.416239	0	11.6892	0.573515	2.27	1.155	3.175	1.625	4.775	-22.464
-1	-9	-5	-3	9	Wt(-1,-9,-5,-3,9)	-0.44538	-0.757304	-0.635883	-0.416239	-2.92535e-17	11.6892	0.533901	2.27	1.155	3.175	1.625	4.775	-22.464
-1	-9	-5	-5	1	Wt(-1,-9,-5,-5,1)	-0.415048	-0.722038	-0.63603	-0.503818	-2.71118e-17	12.6126	0.682944	2.44	1.185	3.24	1.415	4.765	-23.7174
-1	-9	-5	-5	3	Wt(-1,-9,-5,-5,3)	-0.415048	-0.722038	-0.63603	-0.503818	2.71118e-17	12.6126	0.657357	2.44	1.185	3.24	1.415	4.765	-23.7174
-1	-9	-5	-5	5	Wt(-1,-9,-5,-5,5)	-0.415048	-0.722038	-0.63603	-0.503818	0	12.6126	0.624935	2.44	1.185	3.24	1.415	4.765	-23.7174
-1	-9	-5	-5	7	Wt(-1,-9,-5,-5,7)	-0.415048	-0.722038	-0.63603	-0.503818	2.71118e-17	12.6126	0.588941	2.44	1.185	3.24	1.415	4.765	-23.7174
-1	-9	-5	-5	9	Wt(-1,-9,-5,-5,9)	-0.415048	-0.722038	-0.63603	-0.503818	2.71118e-17	12.6126	0.552004	2.44	1.185	3.24	1.415	4.765	-23.7174
-1	-9	-5	-7	1	Wt(-1,-9,-5,-7,1)	-0.384421	-0.6837	-0.628903	-0.572841	-2.49743e-17	13.6921	0.686396	2.445	1.245	3.25	1.3	4.815	-24.872
-1	-9	-5	-7	3	Wt(-1,-9,-5,-7,3)	-0.384421	-0.6837	-0.628903	-0.572841	0	13.6921	0.66457	2.445	1.245	3.25	1.3	4.815	-24.872
-1	-9	-5	-7	5	Wt(-1,-9,-5,-7,5)	-0.384421	-0.6837	-0.628903	-0.572841	0	13.6921	0.636209	2.445	1.245	3.25	1.3	4.815	-24.872
-1	-9	-5	-7	7	Wt(-1,-9,-5,-7,7)	-0.384421	-0.6837	-0.628903	-0.572841	0	13.6921	0.603945	2.445	1.245	3.25	1.3	4.815	-24.872
-1	-9	-5	-7	9	Wt(-1,-9,-5,-7,9)	-0.384421	-0.6837	-0.628903	-0.572841	0	13.6921	0.570054	2.445	1.245	3.25	1.3	4.815	-24.872
-1	-9	-5	-9	1	Wt(-1,-9,-5,-9,1)	-0.355331	-0.645624	-0.617707	-0.626593	-2.29593e-17	14.8938	0.689286	2.515	1.26	3.315	1.235	4.81	-25.9228
-1	-9	-5	-9	3	Wt(-1,-9,-5,-9,3)	-0.355331	-0.645624	-0.617707	-0.626593	-4.59186e-17	14.8938	0.670815	2.515	1.26	3.315	1.235	4.81	-25.9228
-1	-9	-5	-9	5	Wt(-1,-9,-5,-9,5)	-0.355331	-0.645624	-0.617707	-0.626593	-2.29593e-17	14.8938	0.64625	2.515	1.26	3.315	1.235	4.81	-25.9228
-1	-9	-5	-9	7	Wt(-1,-9,-5,-9,7)	-0.355331	-0.645624	-0.617707	-0.626593	2.29593e-17	14.8938	0.61766	2.515	1.26	3.315	1.235	4.81	-25.9228
-1	-9	-5	-9	9	Wt(-1,-9,-5,-9,9)	-0.355331	-0.645624	-0.617707	-0.626593	0	14.8938	0.586953	2.515	1.26	3.315	1.235	4.81	-25.9228
-1	-9	-7	-1	1	Wt(-1,-9,-7,-1,1)	-0.454293	-0.750766	-0.675701	-0.32334	2.78815e-17	12.2644	0.675715	2.22	1.16	3.105	1.785	4.86	-25.011
-1	-9	-7	-1	3	Wt(-1,-9,-7,-1,3)	-0.454293	-0.750766	-0.675701	-0.32334	2.78815e-17	12.2644	0.646632	2.22	1.16	3.105	1.785	4.86	-25.011
-1	-9	-7	-1	5	Wt(-1,-9,-7,-1,5)	-0.454293	-0.750766	-0.675701	-0.32334	-2.78815e-17	12.2644	0.611577	2.22	1.16	3.105	1.785	4.86	-25.011
-1	-9	-7	-1	7	Wt(-1,-9,-7,-1,7)	-0.454293	-0.750766	-0.675701	-0.32334	2.78815e-17	12.2644	0.573897	2.22	1.16	3.105	1.785	4.86	-25.011
-1	-9	-7	-1	9	Wt(-1,-9,-7,-1,9)	-0.454293	-0.750766	-0.675701	-0.32334	2.78815e-17	12.2644	0.536102	2.22	1.16	3.105	1.785	4.86	-25.011
-1	-9	-7	-3	1	Wt(-1,-9,-7,-3,1)	-0.430469	-0.727311	-0.682259	-0.419261	2.6284e-17	13.0099	0.679361	2.27	1.155	3.175	1.625	4.775	-26.4553
-1	-9	-7	-3	3	Wt(-1,-9,-7,-3,3)	-0.430469	-0.727311	-0.682259	-0.419261	0	13.0099	0.653336	2.27	1.155	3.175	1.625	4.775	-26.4553
-1	-9	-7	-3	5	Wt(-1,-9,-7,-3,5)	-0.430469	-0.727311	-0.682259	-0.419261	0	13.0099	0.621319	2.27	1.155	3.175	1.625	4.775	-26.4553
-1	-9	-7	-3	7	Wt(-1,-9,-7,-3,7)	-0.430469	-0.727311	-0.682259	-0.419261	0	13.0099	0.586239	2.27	1.155	3.175	1.625	4.775	-26.4553
-1	-9	-7	-3	9	Wt(-1,-9,-7,-3,9)	-0.430469	-0.727311	-0.682259	-0.419261	0	13.0099	0.550431	2.27	1.155	3.175	1.625	4.775	-26.4553
-1	-9	-7	-5	1	Wt(-1,-9,-7,-5,1)	-0.404087	-0.697525	-0.679463	-0.498445	2.45474e-17	13.9303	0.682867	2.345	1.24	3.185	1.415	4.74	-27.7437
-1	-9	-7	-5	3	Wt(-1,-9,-7,-5,3)	-0.404087	-0.697525	-0.679463	-0.498445	-2.45474e-17	13.9303	0.660028	2.345	1.24	3.185	1.415	4.74	-27.7437
-1	-9	-7	-5	5	Wt(-1,-9,-7,-5,5)	-0.404087	-0.697525	-0.679463	-0.498445	2.45474e-17	13.9303	0.631329	2.345	1.24	3.185	1.415	4.74	-27.7437
-1	-9	-7	-5	7	Wt(-1,-9,-7,-5,7)	-0.404087	-0.697525	-0.679463	-0.498445	-2.45474e-17	13.9303	0.599239	2.345	1.24	3.185	1.415	4.74	-27.7437
-1	-9	-7	-5	9	Wt(-1,-9,-7,-5,9)	-0.404087	-0.697525	-0.679463	-0.498445	0	13.9303	0.565848	2.345	1.24	3.185	1.415	4.74	-27.7437
-1	-9	-7	-7	1	Wt(-1,-9,-7,-7,1)	-0.377347	-0.665037	-0.670566	-0.562406	0	14.9935	0.686007	2.405	1.26	3.2	1.34	4.79	-28.9228
-1	-9	-7	-7	3	Wt(-1,-9,-7,-7,3)	-0.377347	-0.665037	-0.670566	-0.562406	-2.28067e-17	14.9935	0.66622	2.405	1.26	3.2	1.34	4.79	-28.9228
-1	-9	-7	-7	5	Wt(-1,-9,-7,-7,5)	-0.377347	-0.665037	-0.670566	-0.562406	4.56134e-17	14.9935	0.640837	2.405	1.26	3.2	1.34	4.79	-28.9228
-1	-9	-7	-7	7	Wt(-1,-9,-7,-7,7)	-0.377347	-0.665037	-0.670566	-0.562406	-2.28067e-17	14.9935	0.611879	2.405	1.26	3.2	1.34	4.79	-28.9228
-1	-9	-7	-7	9	Wt(-1,-9,-7,-7,9)	-0.377347	-0.665037	-0.670566	-0.562406	0	14.9935	0.581157	2.405	1.26	3.2	1.34	4.79	-28.9228
-1	-9	-7	-9	1	Wt(-1,-9,-7,-9,1)	-0.351637	-0.632336	-0.658148	-0.613515	-4.22911e-17	16.1713	0.688697	2.425	1.305	3.21	1.285	4.76	-30.0075
-1	-9	-7	-9	3	Wt(-1,-9,-7,-9,3)	-0.351637	-0.632336	-0.658148	-0.613515	0	16.1713	0.671678	2.425	1.305	3.21	1.285	4.76	-30.0075
-1	-9	-7	-9	5	Wt(-1,-9,-7,-9,5)	-0.351637	-0.632336	-0.658148	-0.613515	-4.22911e-17	16.1713	0.649418	2.425	1.305	3.21	1.285	4.76	-30.0075
-1	-9	-7	-9	7	Wt(-1,-9,-7,-9,7)	-0.351637	-0.632336	-0.658148	-0.613515	-2.11455e-17	16.1713	0.623539	2.425	1.305	3.21	1.285	4.76	-30.0075
-1	-9	-7	-9	9	Wt(-1,-9,-7,-9,9)	-0.351637	-0.632336	-0.658148	-0.613515	-2.11455e-17	16.1713	0.595569	2.425	1.305	3.21	1.285	4.76	-30.0075
-1	-9	-9	-1	1	Wt(-1,-9,-9,-1,1)	-0.436907	-0.718993	-0.71259	-0.333554	-2.50428e-17	13.6547	0.676628	2.215	1.185	3.085	1.995	4.785	-28.9469
-1	-9	-9	-1	3	Wt(-1,-9,-9,-1,3)	-0.436907	-0.718993	-0.71259	-0.333554	2.50428e-17	13.6547	0.651123	2.215	1.185	3.085	1.995	4.785	-28.9469
-1	-9	-9	-1	5	Wt(-1,-9,-9,-1,5)	-0.436907	-0.718993	-0.71259	-0.333554	-2.50428e-17	13.6547	0.620391	2.215	1.185	3.085	1.995	4.785	-28.9469
-1	-9	-9	-1	7	Wt(-1,-9,-9,-1,7)	-0.436907	-0.718993	-0.71259	-0.333554	0	13.6547	0.58695	2.215	1.185	3.085	1.995	4.785	-28.9469
-1	-9	-9	-1	9	Wt(-1,-9,-9,-1,9)	-0.436907	-0.718993	-0.71259	-0.333554	-2.50428e-17	13.6547	0.552818	2.215	1.185	3.085	1.995	4.785	-28.9469
-1	-9	-9	-3	1	Wt(-1,-9,-9,-3,1)	-0.415999	-0.69897	-0.716116	-0.419399	-4.74604e-17	14.41	0.679864	2.245	1.22	3.1	1.625	4.8	-30.431
-1	-9	-9	-3	3	Wt(-1,-9,-9,-3,3)	-0.415999	-0.69897	-0.716116	-0.419399	0	14.41	0.656852	2.245	1.22	3.1	1.625	4.8	-30.431
-1	-9	-9	-3	5	Wt(-1,-9,-9,-3,5)	-0.415999	-0.69897	-0.716116	-0.419399	-4.74604e-17	14.41	0.62865	2.245	1.22	3.1	1.625	4.8	-30.431
-1	-9	-9	-3	7	Wt(-1,-9,-9,-3,7)	-0.415999	-0.69897	-0.716116	-0.419399	0	14.41	0.59747	2.245	1.22	3.1	1.625	4.8	-30.431
-1	-9	-9	-3	9	Wt(-1,-9,-9,-3,9)	-0.415999	-0.69897	-0.716116	-0.419399	0	14.41	0.565168	2.245	1.22	3.1	1.625	4.8	-30.431
-1	-9	-9	-5	1	Wt(-1,-9,-9,-5,1)	-0.393081	-0.673923	-0.711878	-0.491575	-4.4632e-17	15.3232	0.682982	2.345	1.24	3.185	1.415	4.74	-31.7386
-1	-9	-9	-5	3	Wt(-1,-9,-9,-5,3)	-0.393081	-0.673923	-0.711878	-0.491575	2.2316e-17	15.3232	0.662548	2.345	1.24	3.185	1.415	4.74	-31.7386
-1	-9	-9	-5	5	Wt(-1,-9,-9,-5,5)	-0.393081	-0.673923	-0.711878	-0.491575	-2.2316e-17	15.3232	0.637064	2.345	1.24	3.185	1.415	4.74	-31.7386
-1	-9	-9	-5	7	Wt(-1,-9,-9,-5,7)	-0.393081	-0.673923	-0.711878	-0.491575	2.2316e-17	15.3232	0.608414	2.345	1.24	3.185	1.415	4.74	-31.7386
-1	-9	-9	-5	9	Wt(-1,-9,-9,-5,9)	-0.393081	-0.673923	-0.711878	-0.491575	0	15.3232	0.578254	2.345	1.24	3.185	1.415	4.74	-31.7386
-1	-9	-9	-7	1	Wt(-1,-9,-9,-7,1)	-0.369745	-0.646458	-0.702427	-0.551167	-6.26749e-17	16.3679	0.685816	2.37	1.295	3.185	1.325	4.77	-32.9309
-1	-9	-9	-7	3	Wt(-1,-9,-9,-7,3)	-0.369745	-0.646458	-0.702427	-0.551167	0	16.3679	0.667867	2.37	1.295	3.185	1.325	4.77	-32.9309
-1	-9	-9	-7	5	Wt(-1,-9,-9,-7,5)	-0.369745	-0.646458	-0.702427	-0.551167	-2.08916e-17	16.3679	0.645098	2.37	1.295	3.185	1.325	4.77	-32.9309
-1	-9	-9	-7	7	Wt(-1,-9,-9,-7,7)	-0.369745	-0.646458	-0.702427	-0.551167	-2.08916e-17	16.3679	0.619071	2.37	1.295	3.185	1.325	4.77	-32.9309
-1	-9	-9	-7	9	Wt(-1,-9,-9,-7,9)	-0.369745	-0.646458	-0.702427	-0.551167	0	16.3679	0.591228	2.37	1.295	3.185	1.325	4.77	-32.9309
-1	-9	-9	-9	1	Wt(-1,-9,-9,-9,1)	-0.347056	-0.618451	-0.689831	-0.599887	-1.95171e-17	17.5206	0.688292	2.425	1.305	3.21	1.285	4.76	-34.0307
-1	-9	-9	-9	3	Wt(-1,-9,-9,-9,3)	-0.347056	-0.618451	-0.689831	-0.599887	-3.90343e-17	17.5206	0.672631	2.425	1.305	3.21	1.285	4.76	-34.0307
-1	-9	-9	-9	5	Wt(-1,-9,-9,-9,5)	-0.347056	-0.618451	-0.689831	-0.599887	-1.95171e-17	17.5206	0.652439	2.425	1.305	3.21	1.285	4.76	-34.0307
-1	-9	-9	-9	7	Wt(-1,-9,-9,-9,7)	-0.347056	-0.618451	-0.689831	-0.599887	-5.85514e-17	17.5206	0.628991	2.425	1.305	3.21	1.285	4.76	-34.0307
-1	-9	-9	-9	9	Wt(-1,-9,-9,-9,9)	-0.347056	-0.618451	-0.689831	-0.599887	1.95171e-17	17.5206	0.603515	2.425	1.305	3.21	1.285	4.76	-34.0307
-3	-1	-1	-1	1	Wt(-3,-1,-1,-1,1)	-0.729337	-0.632662	-0.520922	-0.329411	0	3.671	0.628118	1.77	1.57	3.15	1.57	4.8	-8.36265
-3	-1	-1	-1	3	Wt(-3,-1,-1,-1,3)	-0.729337	-0.632662	-0.520922	-0.329411	0	3.671	0.503931	1.77	1.57	3.15	1.57	4.8	-8.36265
-3	-1	-1	-1	5	Wt(-3,-1,-1,-1,5)	-0.729337	-0.632662	-0.520922	-0.329411	-4.65746e-17	3.671	0.400305	1.77	1.57	3.15	1.57	4.8	-8.36265
-3	-1	-1	-1	7	Wt(-3,-1,-1,-1,7)	-0.729337	-0.632662	-0.520922	-0.329411	0	3.671	0.325428	1.77	1.57	3.15	1.57	4.8	-8.36265
-3	-1	-1	-1	9	Wt(-3,-1,-1,-1,9)	-0.729337	-0.632662	-0.520922	-0.329411	0	3.671	0.271722	1.77	1.57	3.15	1.57	4.8	-8.36265
-3	-1	-1	-3	1	Wt(-3,-1,-1,-3,1)	-0.586465	-0.558488	-0.542086	-0.584758	0	4.61424	0.655705	1.8	1.915	3.24	1.32	4.7	-9.55181
-3	-1	-1	-3	3	Wt(-3,-1,-1,-3,3)	-0.586465	-0.558488	-0.542086	-0.584758	-7.41078e-17	4.61424	0.559851	1.8	1.915	3.24	1.32	4.7	-9.55181
-3	-1	-1	-3	5	Wt(-3,-1,-1,-3,5)	-0.586465	-0.558488	-0.542086	-0.584758	-3.70539e-17	4.61424	0.465021	1.8	1.915	3.24	1.32	4.7	-9.55181
-3	-1	-1	-3	7	Wt(-3,-1,-1,-3,7)	-0.586465	-0.558488	-0.542086	-0.584758	-3.70539e-17	4.61424	0.388437	1.8	1.915	3.24	1.32	4.7	-9.55181
-3	-1	-1	-3	9	Wt(-3,-1,-1,-3,9)	-0.586465	-0.558488	-0.542086	-0.584758	-1.11162e-16	4.61424	0.329687	1.8	1.915	3.24	1.32	4.7	-9.55181
-3	-1	-1	-5	1	Wt(-3,-1,-1,-5,1)	-0.461855	-0.478187	-0.521898	-0.707133	0	5.92132	0.674763	1.89	1.92	3.41	1.215	4.68	-10.6107
-3	-1	-1	-5	3	Wt(-3,-1,-1,-5,3)	-0.461855	-0.478187	-0.521898	-0.707133	0	5.92132	0.607784	1.89	1.92	3.41	1.215	4.68	-10.6107
-3	-1	-1	-5	5	Wt(-3,-1,-1,-5,5)	-0.461855	-0.478187	-0.521898	-0.707133	0	5.92132	0.529736	1.89	1.92	3.41	1.215	4.68	-10.6107
-3	-1	-1	-5	7	Wt(-3,-1,-1,-5,7)	-0.461855	-0.478187	-0.521898	-0.707133	-1.44373e-17	5.92132	0.458075	1.89	1.92	3.41	1.215	4.68	-10.6107
-3	-1	-1	-5	9	Wt(-3,-1,-1,-5,9)	-0.461855	-0.478187	-0.521898	-0.707133	0	5.92132	0.397981	1.89	1.92	3.41	1.215	4.68	-10.6107
-3	-1	-1	-7	1	Wt(-3,-1,-1,-7,1)	-0.373347	-0.416918	-0.497077	-0.766842	0	7.40193	0.685423	2.035	1.9	3.395	1.15	4.675	-11.5867
-3	-1	-1	-7	3	Wt(-3,-1,-1,-7,3)	-0.373347	-0.416918	-0.497077	-0.766842	-1.15494e-17	7.40193	0.639365	2.035	1.9	3.395	1.15	4.675	-11.5867
-3	-1	-1	-7	5	Wt(-3,-1,-1,-7,5)	-0.373347	-0.416918	-0.497077	-0.766842	0	7.40193	0.57878	2.035	1.9	3.395	1.15	4.675	-11.5867
-3	-1	-1	-7	7	Wt(-3,-1,-1,-7,7)	-0.373347	-0.416918	-0.497077	-0.766842	-2.30988e-17	7.40193	0.516716	2.035	1.9	3.395	1.15	4.675	-11.5867
-3	-1	-1	-7	9	Wt(-3,-1,-1,-7,9)	-0.373347	-0.416918	-0.497077	-0.766842	0	7.40193	0.459956	2.035	1.9	3.395	1.15	4.675	-11.5867
-3	-1	-1	-9	1	Wt(-3,-1,-1,-9,1)	-0.311261	-0.372384	-0.475816	-0.79873	9.52983e-18	8.97055	0.69136	2.035	1.9	3.395	1.15	4.675	-12.528
-3	-1	-1	-9	3	Wt(-3,-1,-1,-9,3)	-0.311261	-0.372384	-0.475816	-0.79873	-1.90597e-17	8.97055	0.659061	2.035	1.9	3.395	1.15	4.675	-12.528
-3	-1	-1	-9	5	Wt(-3,-1,-1,-9,5)	-0.311261	-0.372384	-0.475816	-0.79873	-2.85895e-17	8.97055	0.6128	2.035	1.9	3.395	1.15	4.675	-12.528
-3	-1	-1	-9	7	Wt(-3,-1,-1,-9,7)	-0.311261	-0.372384	-0.475816	-0.79873	9.52983e-18	8.97055	0.561276	2.035	1.9	3.395	1.15	4.675	-12.528
-3	-1	-1	-9	9	Wt(-3,-1,-1,-9,9)	-0.311261	-0.372384	-0.475816	-0.79873	-9.52983e-18	8.97055	0.510559	2.035	1.9	3.395	1.15	4.675	-12.528
-3	-1	-3	-1	1	Wt(-3,-1,-3,-1,1)	-0.626833	-0.598432	-0.684754	-0.366982	3.48918e-17	4.90018	0.642761	1.785	1.55	3.025	1.67	4.86	-12.2552
-3	-1	-3	-1	3	Wt(-3,-1,-3,-1,3)	-0.626833	-0.598432	-0.684754	-0.366982	0	4.90018	0.55041	1.785	1.55	3.025	1.67	4.86	-12.2552
-3	-1	-3	-1	5	Wt(-3,-1,-3,-1,5)	-0.626833	-0.598432	-0.684754	-0.366982	-3.48918e-17	4.90018	0.461951	1.785	1.55	3.025	1.67	4.86	-12.2552
-3	-1	-3	-1	7	Wt(-3,-1,-3,-1,7)	-0.626833	-0.598432	-0.684754	-0.366982	-3.48918e-17	4.90018	0.389958	1.785	1.55	3.025	1.67	4.86	-12.2552
-3	-1	-3	-1	9	Wt(-3,-1,-3,-1,9)	-0.626833	-0.598432	-0.684754	-0.366982	0	4.90018	0.333874	1.785	1.55	3.025	1.67	4.86	-12.2552
-3	-1	-3	-3	1	Wt(-3,-1,-3,-3,1)	-0.530272	-0.545089	-0.674652	-0.562245	0	5.8466	0.66124	1.92	1.76	3.055	1.33	4.81	-13.5124
-3	-1	-3	-3	3	Wt(-3,-1,-3,-3,3)	-0.530272	-0.545089	-0.674652	-0.562245	-2.92436e-17	5.8466	0.588148	1.92	1.76	3.055	1.33	4.81	-13.5124
-3	-1	-3	-3	5	Wt(-3,-1,-3,-3,5)	-0.530272	-0.545089	-0.674652	-0.562245	-2.92436e-17	5.8466	0.509698	1.92	1.76	3.055	1.33	4.81	-13.5124
-3	-1	-3	-3	7	Wt(-3,-1,-3,-3,7)	-0.530272	-0.545089	-0.674652	-0.562245	0	5.8466	0.440131	1.92	1.76	3.055	1.33	4.81	-13.5124
-3	-1	-3	-3	9	Wt(-3,-1,-3,-3,9)	-0.530272	-0.545089	-0.674652	-0.562245	-8.77309e-17	5.8466	0.382645	1.92	1.76	3.055	1.33	4.81	-13.5124
-3	-1	-3	-5	1	Wt(-3,-1,-3,-5,1)	-0.441142	-0.48519	-0.639149	-0.673371	-2.41051e-17	7.09292	0.675172	1.935	1.81	3.08	1.305	4.75	-14.6087
-3	-1	-3	-5	3	Wt(-3,-1,-3,-5,3)	-0.441142	-0.48519	-0.639149	-0.673371	0	7.09292	0.620897	1.935	1.81	3.08	1.305	4.75	-14.6087
-3	-1	-3	-5	5	Wt(-3,-1,-3,-5,5)	-0.441142	-0.48519	-0.639149	-0.673371	-4.82103e-17	7.09292	0.555972	1.935	1.81	3.08	1.305	4.75	-14.6087
-3	-1	-3	-5	7	Wt(-3,-1,-3,-5,7)	-0.441142	-0.48519	-0.639149	-0.673371	4.82103e-17	7.09292	0.492827	1.935	1.81	3.08	1.305	4.75	-14.6087
-3	-1	-3	-5	9	Wt(-3,-1,-3,-5,9)	-0.441142	-0.48519	-0.639149	-0.673371	-2.41051e-17	7.09292	0.436837	1.935	1.81	3.08	1.305	4.75	-14.6087
-3	-1	-3	-7	1	Wt(-3,-1,-3,-7,1)	-0.371127	-0.434386	-0.602048	-0.736349	2.0095e-17	8.50835	0.684135	1.995	2.11	3.18	1.175	4.75	-15.6372
-3	-1	-3	-7	3	Wt(-3,-1,-3,-7,3)	-0.371127	-0.434386	-0.602048	-0.736349	0	8.50835	0.644448	1.995	2.11	3.18	1.175	4.75	-15.6372
-3	-1	-3	-7	5	Wt(-3,-1,-3,-7,5)	-0.371127	-0.434386	-0.602048	-0.736349	2.0095e-17	8.50835	0.592711	1.995	2.11	3.18	1.175	4.75	-15.6372
-3	-1	-3	-7	7	Wt(-3,-1,-3,-7,7)	-0.371127	-0.434386	-0.602048	-0.736349	-2.0095e-17	8.50835	0.538175	1.995	2.11	3.18	1.175	4.75	-15.6372
-3	-1	-3	-7	9	Wt(-3,-1,-3,-7,9)	-0.371127	-0.434386	-0.602048	-0.736349	0	8.50835	0.486434	1.995	2.11	3.18	1.175	4.75	-15.6372
-3	-1	-3	-9	1	Wt(-3,-1,-3,-9,1)	-0.317954	-0.394193	-0.569919	-0.773743	-1.70609e-17	10.0215	0.689739	2.06	2.05	3.205	1.15	4.74	-16.5868
-3	-1	-3	-9	3	Wt(-3,-1,-3,-9,3)	-0.317954	-0.394193	-0.569919	-0.773743	0	10.0215	0.660455	2.06	2.05	3.205	1.15	4.74	-16.5868
-3	-1	-3	-9	5	Wt(-3,-1,-3,-9,5)	-0.317954	-0.394193	-0.569919	-0.773743	-1.70609e-17	10.0215	0.619727	2.06	2.05	3.205	1.15	4.74	-16.5868
-3	-1	-3	-9	7	Wt(-3,-1,-3,-9,7)	-0.317954	-0.394193	-0.569919	-0.773743	1.70609e-17	10.0215	0.573948	2.06	2.05	3.205	1.15	4.74	-16.5868
-3	-1	-3	-9	9	Wt(-3,-1,-3,-9,9)	-0.317954	-0.394193	-0.569919	-0.773743	0	10.0215	0.527905	2.06	2.05	3.205	1.15	4.74	-16.5868
-3	-1	-5	-1	1	Wt(-3,-1,-5,-1,1)	-0.545813	-0.557868	-0.7557	-0.375964	-5.38526e-17	6.34977	0.654181	1.905	1.68	2.93	1.69	4.805	-16.0822
-3	-1	-5	-1	3	Wt(-3,-1,-5,-1,3)	-0.545813	-0.557868	-0.7557	-0.375964	-2.69263e-17	6.34977	0.585576	1.905	1.68	2.93	1.69	4.805	-16.0822
-3	-1	-5	-1	5	Wt(-3,-1,-5,-1,5)	-0.545813	-0.557868	-0.7557	-0.375964	0	6.34977	0.513223	1.905	1.68	2.93	1.69	4.805	-16.0822
-3	-1	-5	-1	7	Wt(-3,-1,-5,-1,7)	-0.545813	-0.557868	-0.7557	-0.375964	-2.69263e-17	6.34977	0.448227	1.905	1.68	2.93	1.69	4.805	-16.0822
-3	-1	-5	-1	9	Wt(-3,-1,-5,-1,9)	-0.545813	-0.557868	-0.7557	-0.375964	-2.69263e-17	6.34977	0.393478	1.905	1.68	2.93	1.69	4.805	-16.0822
-3	-1	-5	-3	1	Wt(-3,-1,-5,-3,1)	-0.4807	-0.522291	-0.741107	-0.533213	2.35194e-17	7.26957	0.666484	1.89	1.805	2.995	1.43	4.81	-17.3705
-3	-1	-5	-3	3	Wt(-3,-1,-5,-3,3)	-0.4807	-0.522291	-0.741107	-0.533213	-2.35194e-17	7.26957	0.610396	1.89	1.805	2.995	1.43	4.81	-17.3705
-3	-1	-5	-3	5	Wt(-3,-1,-5,-3,5)	-0.4807	-0.522291	-0.741107	-0.533213	-4.70388e-17	7.26957	0.54668	1.89	1.805	2.995	1.43	4.81	-17.3705
-3	-1	-5	-3	7	Wt(-3,-1,-5,-3,7)	-0.4807	-0.522291	-0.741107	-0.533213	0	7.26957	0.485784	1.89	1.805	2.995	1.43	4.81	-17.3705
-3	-1	-5	-3	9	Wt(-3,-1,-5,-3,9)	-0.4807	-0.522291	-0.741107	-0.533213	0	7.26957	0.432	1.89	1.805	2.995	1.43	4.81	-17.3705
-3	-1	-5	-5	1	Wt(-3,-1,-5,-5,1)	-0.417158	-0.479693	-0.707645	-0.635257	-2.02442e-17	8.44567	0.676521	1.905	1.9	3.03	1.305	4.87	-18.4801
-3	-1	-5	-5	3	Wt(-3,-1,-5,-5,3)	-0.417158	-0.479693	-0.707645	-0.635257	0	8.44567	0.632644	1.905	1.9	3.03	1.305	4.87	-18.4801
-3	-1	-5	-5	5	Wt(-3,-1,-5,-5,5)	-0.417158	-0.479693	-0.707645	-0.635257	-6.07325e-17	8.44567	0.579088	1.905	1.9	3.03	1.305	4.87	-18.4801
-3	-1	-5	-5	7	Wt(-3,-1,-5,-5,7)	-0.417158	-0.479693	-0.707645	-0.635257	-2.02442e-17	8.44567	0.524469	1.905	1.9	3.03	1.305	4.87	-18.4801
-3	-1	-5	-5	9	Wt(-3,-1,-5,-5,9)	-0.417158	-0.479693	-0.707645	-0.635257	-4.04884e-17	8.44567	0.473575	1.905	1.9	3.03	1.305	4.87	-18.4801
-3	-1	-5	-7	1	Wt(-3,-1,-5,-7,1)	-0.362951	-0.439993	-0.670904	-0.700392	0	9.78611	0.683735	1.955	1.985	3.04	1.265	4.86	-19.5611
-3	-1	-5	-7	3	Wt(-3,-1,-5,-7,3)	-0.362951	-0.439993	-0.670904	-0.700392	0	9.78611	0.649927	1.955	1.985	3.04	1.265	4.86	-19.5611
-3	-1	-5	-7	5	Wt(-3,-1,-5,-7,5)	-0.362951	-0.439993	-0.670904	-0.700392	0	9.78611	0.606084	1.955	1.985	3.04	1.265	4.86	-19.5611
-3	-1	-5	-7	7	Wt(-3,-1,-5,-7,7)	-0.362951	-0.439993	-0.670904	-0.700392	1.74713e-17	9.78611	0.558689	1.955	1.985	3.04	1.265	4.86	-19.5611
-3	-1	-5	-7	9	Wt(-3,-1,-5,-7,9)	-0.362951	-0.439993	-0.670904	-0.700392	0	9.78611	0.512195	1.955	1.985	3.04	1.265	4.86	-19.5611
-3	-1	-5	-9	1	Wt(-3,-1,-5,-9,1)	-0.318777	-0.406004	-0.636968	-0.742781	0	11.2322	0.688712	2.06	2.065	3.155	1.16	4.785	-20.5647
-3	-1	-5	-9	3	Wt(-3,-1,-5,-9,3)	-0.318777	-0.406004	-0.636968	-0.742781	0	11.2322	0.662614	2.06	2.065	3.155	1.16	4.785	-20.5647
-3	-1	-5	-9	5	Wt(-3,-1,-5,-9,5)	-0.318777	-0.406004	-0.636968	-0.742781	-1.52219e-17	11.2322	0.627081	2.06	2.065	3.155	1.16	4.785	-20.5647
-3	-1	-5	-9	7	Wt(-3,-1,-5,-9,7)	-0.318777	-0.406004	-0.636968	-0.742781	0	11.2322	0.586761	2.06	2.065	3.155	1.16	4.785	-20.5647
-3	-1	-5	-9	9	Wt(-3,-1,-5,-9,9)	-0.318777	-0.406004	-0.636968	-0.742781	-1.52219e-17	11.2322	0.545373	2.06	2.065	3.155	1.16	4.785	-20.5647
-3	-1	-7	-1	1	Wt(-3,-1,-7,-1,1)	-0.488645	-0.525644	-0.790144	-0.376776	0	7.89936	0.661867	1.945	1.82	2.885	1.705	4.78	-19.7919
-3	-1	-7	-1	3	Wt(-3,-1,-7,-1,3)	-0.488645	-0.525644	-0.790144	-0.376776	0	7.89936	0.609372	1.945	1.82	2.885	1.705	4.78	-19.7919
-3	-1	-7	-1	5	Wt(-3,-1,-7,-1,5)	-0.488645	-0.525644	-0.790144	-0.376776	-4.32885e-17	7.89936	0.550691	1.945	1.82	2.885	1.705	4.78	-19.7919
-3	-1	-7	-1	7	Wt(-3,-1,-7,-1,7)	-0.488645	-0.525644	-0.790144	-0.376776	-4.32885e-17	7.89936	0.494092	1.945	1.82	2.885	1.705	4.78	-19.7919
-3	-1	-7	-1	9	Wt(-3,-1,-7,-1,9)	-0.488645	-0.525644	-0.790144	-0.376776	0	7.89936	0.443276	1.945	1.82	2.885	1.705	4.78	-19.7919
-3	-1	-7	-3	1	Wt(-3,-1,-7,-3,1)	-0.442344	-0.501275	-0.776997	-0.507929	-3.88976e-17	8.79107	0.670518	1.915	2.085	2.925	1.42	4.845	-21.149
-3	-1	-7	-3	3	Wt(-3,-1,-7,-3,3)	-0.442344	-0.501275	-0.776997	-0.507929	0	8.79107	0.626349	1.915	2.085	2.925	1.42	4.845	-21.149
-3	-1	-7	-3	5	Wt(-3,-1,-7,-3,5)	-0.442344	-0.501275	-0.776997	-0.507929	-3.88976e-17	8.79107	0.57443	1.915	2.085	2.925	1.42	4.845	-21.149
-3	-1	-7	-3	7	Wt(-3,-1,-7,-3,7)	-0.442344	-0.501275	-0.776997	-0.507929	-3.88976e-17	8.79107	0.522065	1.915	2.085	2.925	1.42	4.845	-21.149
-3	-1	-7	-3	9	Wt(-3,-1,-7,-3,9)	-0.442344	-0.501275	-0.776997	-0.507929	-3.88976e-17	8.79107	0.473285	1.915	2.085	2.925	1.42	4.845	-21.149
-3	-1	-7	-5	1	Wt(-3,-1,-7,-5,1)	-0.395469	-0.470565	-0.749032	-0.60109	-1.72604e-17	9.90564	0.677975	2.005	2.1	2.935	1.335	4.82	-22.2896
-3	-1	-7	-5	3	Wt(-3,-1,-7,-5,3)	-0.395469	-0.470565	-0.749032	-0.60109	1.72604e-17	9.90564	0.641996	2.005	2.1	2.935	1.335	4.82	-22.2896
-3	-1	-7	-5	5	Wt(-3,-1,-7,-5,5)	-0.395469	-0.470565	-0.749032	-0.60109	-5.17813e-17	9.90564	0.597565	2.005	2.1	2.935	1.335	4.82	-22.2896
-3	-1	-7	-5	7	Wt(-3,-1,-7,-5,7)	-0.395469	-0.470565	-0.749032	-0.60109	-5.17813e-17	9.90564	0.550632	2.005	2.1	2.935	1.335	4.82	-22.2896
-3	-1	-7	-5	9	Wt(-3,-1,-7,-5,9)	-0.395469	-0.470565	-0.749032	-0.60109	-1.72604e-17	9.90564	0.505109	2.005	2.1	2.935	1.335	4.82	-22.2896
-3	-1	-7	-7	1	Wt(-3,-1,-7,-7,1)	-0.353065	-0.439824	-0.716555	-0.665956	0	11.1766	0.683778	2.04	1.995	2.955	1.31	4.825	-23.3942
-3	-1	-7	-7	3	Wt(-3,-1,-7,-7,3)	-0.353065	-0.439824	-0.716555	-0.665956	0	11.1766	0.654883	2.04	1.995	2.955	1.31	4.825	-23.3942
-3	-1	-7	-7	5	Wt(-3,-1,-7,-7,5)	-0.353065	-0.439824	-0.716555	-0.665956	1.52977e-17	11.1766	0.61761	2.04	1.995	2.955	1.31	4.825	-23.3942
-3	-1	-7	-7	7	Wt(-3,-1,-7,-7,7)	-0.353065	-0.439824	-0.716555	-0.665956	-1.52977e-17	11.1766	0.576525	2.04	1.995	2.955	1.31	4.825	-23.3942
-3	-1	-7	-7	9	Wt(-3,-1,-7,-7,9)	-0.353065	-0.439824	-0.716555	-0.665956	1.52977e-17	11.1766	0.535088	2.04	1.995	2.955	1.31	4.825	-23.3942
-3	-1	-7	-9	1	Wt(-3,-1,-7,-9,1)	-0.31655	-0.411756	-0.684715	-0.711348	1.36165e-17	12.5565	0.688099	2.145	2.155	3	1.23	4.74	-24.4432
-3	-1	-7	-9	3	Wt(-3,-1,-7,-9,3)	-0.31655	-0.411756	-0.684715	-0.711348	0	12.5565	0.664944	2.145	2.155	3	1.23	4.74	-24.4432
-3	-1	-7	-9	5	Wt(-3,-1,-7,-9,5)	-0.31655	-0.411756	-0.684715	-0.711348	2.72329e-17	12.5565	0.633952	2.145	2.155	3	1.23	4.74	-24.4432
-3	-1	-7	-9	7	Wt(-3,-1,-7,-9,7)	-0.31655	-0.411756	-0.684715	-0.711348	-1.36165e-17	12.5565	0.598511	2.145	2.155	3	1.23	4.74	-24.4432
-3	-1	-7	-9	9	Wt(-3,-1,-7,-9,9)	-0.31655	-0.411756	-0.684715	-0.711348	-2.72329e-17	12.5565	0.561487	2.145	2.155	3	1.23	4.74	-24.4432
-3	-1	-9	-1	1	Wt(-3,-1,-9,-1,1)	-0.447802	-0.501273	-0.808908	-0.375289	-3.59944e-17	9.50014	0.6671	2.02	1.815	2.86	1.72	4.775	-23.4975
-3	-1	-9	-1	3	Wt(-3,-1,-9,-1,3)	-0.447802	-0.501273	-0.808908	-0.375289	3.59944e-17	9.50014	0.625559	2.02	1.815	2.86	1.72	4.775	-23.4975
-3	-1	-9	-1	5	Wt(-3,-1,-9,-1,5)	-0.447802	-0.501273	-0.808908	-0.375289	-3.59944e-17	9.50014	0.577536	2.02	1.815	2.86	1.72	4.775	-23.4975
-3	-1	-9	-1	7	Wt(-3,-1,-9,-1,7)	-0.447802	-0.501273	-0.808908	-0.375289	-3.59944e-17	9.50014	0.528884	2.02	1.815	2.86	1.72	4.775	-23.4975
-3	-1	-9	-1	9	Wt(-3,-1,-9,-1,9)	-0.447802	-0.501273	-0.808908	-0.375289	3.59944e-17	9.50014	0.483014	2.02	1.815	2.86	1.72	4.775	-23.4975
-3	-1	-9	-3	1	Wt(-3,-1,-9,-3,1)	-0.413093	-0.483869	-0.798021	-0.487493	0	10.3678	0.67353	2.045	2.03	2.89	1.48	4.73	-24.8634
-3	-1	-9	-3	3	Wt(-3,-1,-9,-3,3)	-0.413093	-0.483869	-0.798021	-0.487493	-6.5964e-17	10.3678	0.637757	2.045	2.03	2.89	1.48	4.73	-24.8634
-3	-1	-9	-3	5	Wt(-3,-1,-9,-3,5)	-0.413093	-0.483869	-0.798021	-0.487493	-3.2982e-17	10.3678	0.5949	2.045	2.03	2.89	1.48	4.73	-24.8634
-3	-1	-9	-3	7	Wt(-3,-1,-9,-3,7)	-0.413093	-0.483869	-0.798021	-0.487493	-3.2982e-17	10.3678	0.550035	2.045	2.03	2.89	1.48	4.73	-24.8634
-3	-1	-9	-3	9	Wt(-3,-1,-9,-3,9)	-0.413093	-0.483869	-0.798021	-0.487493	-3.2982e-17	10.3678	0.506506	2.045	2.03	2.89	1.48	4.73	-24.8634
-3	-1	-9	-5	1	Wt(-3,-1,-9,-5,1)	-0.377155	-0.461095	-0.77527	-0.572366	-2.99122e-17	11.4318	0.679283	2.065	2.115	2.91	1.335	4.825	-26.0449
-3	-1	-9	-5	3	Wt(-3,-1,-9,-5,3)	-0.377155	-0.461095	-0.77527	-0.572366	-2.99122e-17	11.4318	0.64923	2.065	2.115	2.91	1.335	4.825	-26.0449
-3	-1	-9	-5	5	Wt(-3,-1,-9,-5,5)	-0.377155	-0.461095	-0.77527	-0.572366	-2.99122e-17	11.4318	0.611932	2.065	2.115	2.91	1.335	4.825	-26.0449
-3	-1	-9	-5	7	Wt(-3,-1,-9,-5,7)	-0.377155	-0.461095	-0.77527	-0.572366	-2.99122e-17	11.4318	0.571542	2.065	2.115	2.91	1.335	4.825	-26.0449
-3	-1	-9	-5	9	Wt(-3,-1,-9,-5,9)	-0.377155	-0.461095	-0.77527	-0.572366	-2.99122e-17	11.4318	0.531133	2.065	2.115	2.91	1.335	4.825	-26.0449
-3	-1	-9	-7	1	Wt(-3,-1,-9,-7,1)	-0.343303	-0.437064	-0.747607	-0.635319	2.70474e-17	12.6427	0.684017	2.07	2.115	2.93	1.31	4.815	-27.1606
-3	-1	-9	-7	3	Wt(-3,-1,-9,-7,3)	-0.343303	-0.437064	-0.747607	-0.635319	0	12.6427	0.659093	2.07	2.115	2.93	1.31	4.815	-27.1606
-3	-1	-9	-7	5	Wt(-3,-1,-9,-7,5)	-0.343303	-0.437064	-0.747607	-0.635319	0	12.6427	0.627141	2.07	2.115	2.93	1.31	4.815	-27.1606
-3	-1	-9	-7	7	Wt(-3,-1,-9,-7,7)	-0.343303	-0.437064	-0.747607	-0.635319	0	12.6427	0.591424	2.07	2.115	2.93	1.31	4.815	-27.1606
-3	-1	-9	-7	9	Wt(-3,-1,-9,-7,9)	-0.343303	-0.437064	-0.747607	-0.635319	-2.70474e-17	12.6427	0.554603	2.07	2.115	2.93	1.31	4.815	-27.1606
-3	-1	-9	-9	1	Wt(-3,-1,-9,-9,1)	-0.312913	-0.413985	-0.719138	-0.681917	-2.44912e-17	13.9622	0.687751	2.16	2.1	2.955	1.255	4.81	-28.2408
-3	-1	-9	-9	3	Wt(-3,-1,-9,-9,3)	-0.312913	-0.413985	-0.719138	-0.681917	-2.44912e-17	13.9622	0.667166	2.16	2.1	2.955	1.255	4.81	-28.2408
-3	-1	-9	-9	5	Wt(-3,-1,-9,-9,5)	-0.312913	-0.413985	-0.719138	-0.681917	0	13.9622	0.640016	2.16	2.1	2.955	1.255	4.81	-28.2408
-3	-1	-9	-9	7	Wt(-3,-1,-9,-9,7)	-0.312913	-0.413985	-0.719138	-0.681917	-2.44912e-17	13.9622	0.608793	2.16	2.1	2.955	1.255	4.81	-28.2408
-3	-1	-9	-9	9	Wt(-3,-1,-9,-9,9)	-0.312913	-0.413985	-0.719138	-0.681917	-2.44912e-17	13.9622	0.575709	2.16	2.1	2.955	1.255	4.81	-28.2408
-3	-3	-1	-1	1	Wt(-3,-3,-1,-1,1)	-0.681137	-0.745899	-0.497709	-0.288844	-3.37386e-17	5.06766	0.647878	1.85	1.29	3.12	1.71	4.855	-10.4885
-3	-3	-1	-1	3	Wt(-3,-3,-1,-1,3)	-0.681137	-0.745899	-0.497709	-0.288844	-3.37386e-17	5.06766	0.559328	1.85	1.29	3.12	1.71	4.855	-10.4885
-3	-3	-1	-1	5	Wt(-3,-3,-1,-1,5)	-0.681137	-0.745899	-0.497709	-0.288844	0	5.06766	0.472324	1.85	1.29	3.12	1.71	4.855	-10.4885
-3	-3	-1	-1	7	Wt(-3,-3,-1,-1,7)	-0.681137	-0.745899	-0.497709	-0.288844	0	5.06766	0.400304	1.85	1.29	3.12	1.71	4.855	-10.4885
-3	-3	-1	-1	9	Wt(-3,-3,-1,-1,9)	-0.681137	-0.745899	-0.497709	-0.288844	0	5.06766	0.343593	1.85	1.29	3.12	1.71	4.855	-10.4885
-3	-3	-1	-3	1	Wt(-3,-3,-1,-3,1)	-0.592433	-0.686732	-0.529582	-0.5026	-2.91029e-17	5.87488	0.662946	1.965	1.37	3.19	1.42	4.815	-11.8416
-3	-3	-1	-3	3	Wt(-3,-3,-1,-3,3)	-0.592433	-0.686732	-0.529582	-0.5026	0	5.87488	0.590639	1.965	1.37	3.19	1.42	4.815	-11.8416
-3	-3	-1	-3	5	Wt(-3,-3,-1,-3,5)	-0.592433	-0.686732	-0.529582	-0.5026	0	5.87488	0.512387	1.965	1.37	3.19	1.42	4.815	-11.8416
-3	-3	-1	-3	7	Wt(-3,-3,-1,-3,7)	-0.592433	-0.686732	-0.529582	-0.5026	0	5.87488	0.442698	1.965	1.37	3.19	1.42	4.815	-11.8416
-3	-3	-1	-3	9	Wt(-3,-3,-1,-3,9)	-0.592433	-0.686732	-0.529582	-0.5026	-5.82057e-17	5.87488	0.384977	1.965	1.37	3.19	1.42	4.815	-11.8416
-3	-3	-1	-5	1	Wt(-3,-3,-1,-5,1)	-0.499767	-0.610823	-0.526979	-0.63257	0	7.0216	0.675642	2	1.48	3.335	1.28	4.78	-12.9623
-3	-3	-1	-5	3	Wt(-3,-3,-1,-5,3)	-0.499767	-0.610823	-0.526979	-0.63257	-2.435e-17	7.0216	0.620851	2	1.48	3.335	1.28	4.78	-12.9623
-3	-3	-1	-5	5	Wt(-3,-3,-1,-5,5)	-0.499767	-0.610823	-0.526979	-0.63257	-4.86999e-17	7.0216	0.555223	2	1.48	3.335	1.28	4.78	-12.9623
-3	-3	-1	-5	7	Wt(-3,-3,-1,-5,7)	-0.499767	-0.610823	-0.526979	-0.63257	0	7.0216	0.491515	2	1.48	3.335	1.28	4.78	-12.9623
-3	-3	-1	-5	9	Wt(-3,-3,-1,-5,9)	-0.499767	-0.610823	-0.526979	-0.63257	0	7.0216	0.435171	2	1.48	3.335	1.28	4.78	-12.9623
-3	-3	-1	-7	1	Wt(-3,-3,-1,-7,1)	-0.422712	-0.542863	-0.512489	-0.708603	-2.04286e-17	8.36943	0.684271	2.08	1.485	3.335	1.24	4.755	-14.0003
-3	-3	-1	-7	3	Wt(-3,-3,-1,-7,3)	-0.422712	-0.542863	-0.512489	-0.708603	0	8.36943	0.643794	2.08	1.485	3.335	1.24	4.755	-14.0003
-3	-3	-1	-7	5	Wt(-3,-3,-1,-7,5)	-0.422712	-0.542863	-0.512489	-0.708603	2.04286e-17	8.36943	0.591028	2.08	1.485	3.335	1.24	4.755	-14.0003
-3	-3	-1	-7	7	Wt(-3,-3,-1,-7,7)	-0.422712	-0.542863	-0.512489	-0.708603	0	8.36943	0.535607	2.08	1.485	3.335	1.24	4.755	-14.0003
-3	-3	-1	-7	9	Wt(-3,-3,-1,-7,9)	-0.422712	-0.542863	-0.512489	-0.708603	-2.04286e-17	8.36943	0.483257	2.08	1.485	3.335	1.24	4.755	-14.0003
-3	-3	-1	-9	1	Wt(-3,-3,-1,-9,1)	-0.362601	-0.487793	-0.495957	-0.754322	-1.73826e-17	9.83604	0.689805	2.185	1.43	3.39	1.205	4.8	-14.9974
-3	-3	-1	-9	3	Wt(-3,-3,-1,-9,3)	-0.362601	-0.487793	-0.495957	-0.754322	-1.73826e-17	9.83604	0.659817	2.185	1.43	3.39	1.205	4.8	-14.9974
-3	-3	-1	-9	5	Wt(-3,-3,-1,-9,5)	-0.362601	-0.487793	-0.495957	-0.754322	-1.73826e-17	9.83604	0.618083	2.185	1.43	3.39	1.205	4.8	-14.9974
-3	-3	-1	-9	7	Wt(-3,-3,-1,-9,7)	-0.362601	-0.487793	-0.495957	-0.754322	1.73826e-17	9.83604	0.571329	2.185	1.43	3.39	1.205	4.8	-14.9974
-3	-3	-1	-9	9	Wt(-3,-3,-1,-9,9)	-0.362601	-0.487793	-0.495957	-0.754322	-1.73826e-17	9.83604	0.524517	2.185	1.43	3.39	1.205	4.8	-14.9974
-3	-3	-3	-1	1	Wt(-3,-3,-3,-1,1)	-0.61858	-0.706062	-0.637777	-0.330165	0	6.21742	0.653702	1.87	1.29	3.095	1.735	4.825	-14.4184
-3	-3	-3	-1	3	Wt(-3,-3,-3,-1,3)	-0.61858	-0.706062	-0.637777	-0.330165	0	6.21742	0.583348	1.87	1.29	3.095	1.735	4.825	-14.4184
-3	-3	-3	-1	5	Wt(-3,-3,-3,-1,5)	-0.61858	-0.706062	-0.637777	-0.330165	-2.74995e-17	6.21742	0.509601	1.87	1.29	3.095	1.735	4.825	-14.4184
-3	-3	-3	-1	7	Wt(-3,-3,-3,-1,7)	-0.61858	-0.706062	-0.637777	-0.330165	2.74995e-17	6.21742	0.443839	1.87	1.29	3.095	1.735	4.825	-14.4184
-3	-3	-3	-1	9	Wt(-3,-3,-3,-1,9)	-0.61858	-0.706062	-0.637777	-0.330165	-2.74995e-17	6.21742	0.388793	1.87	1.29	3.095	1.735	4.825	-14.4184
-3	-3	-3	-3	1	Wt(-3,-3,-3,-3,1)	-0.54881	-0.657833	-0.645079	-0.501651	-2.42171e-17	7.06012	0.665619	1.915	1.35	3.16	1.495	4.84	-15.8395
-3	-3	-3	-3	3	Wt(-3,-3,-3,-3,3)	-0.54881	-0.657833	-0.645079	-0.501651	-2.42171e-17	7.06012	0.607323	1.915	1.35	3.16	1.495	4.84	-15.8395
-3	-3	-3	-3	5	Wt(-3,-3,-3,-3,5)	-0.54881	-0.657833	-0.645079	-0.501651	-2.42171e-17	7.06012	0.541652	1.915	1.35	3.16	1.495	4.84	-15.8395
-3	-3	-3	-3	7	Wt(-3,-3,-3,-3,7)	-0.54881	-0.657833	-0.645079	-0.501651	-2.42171e-17	7.06012	0.479523	1.915	1.35	3.16	1.495	4.84	-15.8395
-3	-3	-3	-3	9	Wt(-3,-3,-3,-3,9)	-0.54881	-0.657833	-0.645079	-0.501651	-2.42171e-17	7.06012	0.425145	1.915	1.35	3.16	1.495	4.84	-15.8395
-3	-3	-3	-5	1	Wt(-3,-3,-3,-5,1)	-0.476907	-0.598537	-0.628406	-0.614639	-2.08896e-17	8.18475	0.675815	1.97	1.47	3.18	1.345	4.78	-16.9845
-3	-3	-3	-5	3	Wt(-3,-3,-3,-5,3)	-0.476907	-0.598537	-0.628406	-0.614639	0	8.18475	0.629954	1.97	1.47	3.18	1.345	4.78	-16.9845
-3	-3	-3	-5	5	Wt(-3,-3,-3,-5,5)	-0.476907	-0.598537	-0.628406	-0.614639	2.08896e-17	8.18475	0.574367	1.97	1.47	3.18	1.345	4.78	-16.9845
-3	-3	-3	-5	7	Wt(-3,-3,-3,-5,7)	-0.476907	-0.598537	-0.628406	-0.614639	-2.08896e-17	8.18475	0.51823	1.97	1.47	3.18	1.345	4.78	-16.9845
-3	-3	-3	-5	9	Wt(-3,-3,-3,-5,9)	-0.476907	-0.598537	-0.628406	-0.614639	-2.08896e-17	8.18475	0.466417	1.97	1.47	3.18	1.345	4.78	-16.9845
-3	-3	-3	-7	1	Wt(-3,-3,-3,-7,1)	-0.414267	-0.54294	-0.603939	-0.686881	0	9.49161	0.683277	2.05	1.475	3.18	1.305	4.755	-18.0819
-3	-3	-3	-7	3	Wt(-3,-3,-3,-7,3)	-0.414267	-0.54294	-0.603939	-0.686881	1.80134e-17	9.49161	0.647924	2.05	1.475	3.18	1.305	4.755	-18.0819
-3	-3	-3	-7	5	Wt(-3,-3,-3,-7,5)	-0.414267	-0.54294	-0.603939	-0.686881	0	9.49161	0.602287	2.05	1.475	3.18	1.305	4.755	-18.0819
-3	-3	-3	-7	7	Wt(-3,-3,-3,-7,7)	-0.414267	-0.54294	-0.603939	-0.686881	-3.60267e-17	9.49161	0.553345	2.05	1.475	3.18	1.305	4.755	-18.0819
-3	-3	-3	-7	9	Wt(-3,-3,-3,-7,9)	-0.414267	-0.54294	-0.603939	-0.686881	-1.80134e-17	9.49161	0.505742	2.05	1.475	3.18	1.305	4.755	-18.0819
-3	-3	-3	-9	1	Wt(-3,-3,-3,-9,1)	-0.362858	-0.495433	-0.579121	-0.73369	-1.56637e-17	10.9154	0.688447	2.13	1.57	3.23	1.215	4.77	-19.1178
-3	-3	-3	-9	3	Wt(-3,-3,-3,-9,3)	-0.362858	-0.495433	-0.579121	-0.73369	0	10.9154	0.661217	2.13	1.57	3.23	1.215	4.77	-19.1178
-3	-3	-3	-9	5	Wt(-3,-3,-3,-9,5)	-0.362858	-0.495433	-0.579121	-0.73369	-3.13273e-17	10.9154	0.624228	2.13	1.57	3.23	1.215	4.77	-19.1178
-3	-3	-3	-9	7	Wt(-3,-3,-3,-9,7)	-0.362858	-0.495433	-0.579121	-0.73369	-3.13273e-17	10.9154	0.582503	2.13	1.57	3.23	1.215	4.77	-19.1178
-3	-3	-3	-9	9	Wt(-3,-3,-3,-9,9)	-0.362858	-0.495433	-0.579121	-0.73369	0	10.9154	0.539971	2.13	1.57	3.23	1.215	4.77	-19.1178
-3	-3	-5	-1	1	Wt(-3,-3,-5,-1,1)	-0.559644	-0.659906	-0.713841	-0.348679	-4.5133e-17	7.57653	0.659772	1.87	1.35	3.035	1.845	4.805	-18.314
-3	-3	-5	-1	3	Wt(-3,-3,-5,-1,3)	-0.559644	-0.659906	-0.713841	-0.348679	0	7.57653	0.604216	1.87	1.35	3.035	1.845	4.805	-18.314
-3	-3	-5	-1	5	Wt(-3,-3,-5,-1,5)	-0.559644	-0.659906	-0.713841	-0.348679	4.5133e-17	7.57653	0.54295	1.87	1.35	3.035	1.845	4.805	-18.314
-3	-3	-5	-1	7	Wt(-3,-3,-5,-1,7)	-0.559644	-0.659906	-0.713841	-0.348679	0	7.57653	0.484708	1.87	1.35	3.035	1.845	4.805	-18.314
-3	-3	-5	-1	9	Wt(-3,-3,-5,-1,9)	-0.559644	-0.659906	-0.713841	-0.348679	0	7.57653	0.433078	1.87	1.35	3.035	1.845	4.805	-18.314
-3	-3	-5	-3	1	Wt(-3,-3,-5,-3,1)	-0.506803	-0.623795	-0.712022	-0.490404	-4.05968e-17	8.42312	0.668811	1.915	1.495	3.12	1.42	4.81	-19.8031
-3	-3	-5	-3	3	Wt(-3,-3,-5,-3,3)	-0.506803	-0.623795	-0.712022	-0.490404	-4.05968e-17	8.42312	0.621844	1.915	1.495	3.12	1.42	4.81	-19.8031
-3	-3	-5	-3	5	Wt(-3,-3,-5,-3,5)	-0.506803	-0.623795	-0.712022	-0.490404	0	8.42312	0.56729	1.915	1.495	3.12	1.42	4.81	-19.8031
-3	-3	-5	-3	7	Wt(-3,-3,-5,-3,7)	-0.506803	-0.623795	-0.712022	-0.490404	0	8.42312	0.513023	1.915	1.495	3.12	1.42	4.81	-19.8031
-3	-3	-5	-3	9	Wt(-3,-3,-5,-3,9)	-0.506803	-0.623795	-0.712022	-0.490404	0	8.42312	0.463117	1.915	1.495	3.12	1.42	4.81	-19.8031
-3	-3	-5	-5	1	Wt(-3,-3,-5,-5,1)	-0.451875	-0.579232	-0.692545	-0.590891	-1.79776e-17	9.5105	0.676775	2.06	1.575	3.09	1.32	4.76	-20.9679
-3	-3	-5	-5	3	Wt(-3,-3,-5,-5,3)	-0.451875	-0.579232	-0.692545	-0.590891	-3.59551e-17	9.5105	0.638531	2.06	1.575	3.09	1.32	4.76	-20.9679
-3	-3	-5	-5	5	Wt(-3,-3,-5,-5,5)	-0.451875	-0.579232	-0.692545	-0.590891	-1.79776e-17	9.5105	0.591724	2.06	1.575	3.09	1.32	4.76	-20.9679
-3	-3	-5	-5	7	Wt(-3,-3,-5,-5,7)	-0.451875	-0.579232	-0.692545	-0.590891	-1.79776e-17	9.5105	0.542853	2.06	1.575	3.09	1.32	4.76	-20.9679
-3	-3	-5	-5	9	Wt(-3,-3,-5,-5,9)	-0.451875	-0.579232	-0.692545	-0.590891	-3.59551e-17	9.5105	0.495999	2.06	1.575	3.09	1.32	4.76	-20.9679
-3	-3	-5	-7	1	Wt(-3,-3,-5,-7,1)	-0.401845	-0.535324	-0.666494	-0.660285	3.17622e-17	10.766	0.682996	2.055	1.62	3.105	1.29	4.75	-22.0565
-3	-3	-5	-7	3	Wt(-3,-3,-5,-7,3)	-0.401845	-0.535324	-0.666494	-0.660285	-1.58811e-17	10.766	0.652387	2.055	1.62	3.105	1.29	4.75	-22.0565
-3	-3	-5	-7	5	Wt(-3,-3,-5,-7,5)	-0.401845	-0.535324	-0.666494	-0.660285	0	10.766	0.613136	2.055	1.62	3.105	1.29	4.75	-22.0565
-3	-3	-5	-7	7	Wt(-3,-3,-5,-7,7)	-0.401845	-0.535324	-0.666494	-0.660285	1.58811e-17	10.766	0.57026	2.055	1.62	3.105	1.29	4.75	-22.0565
-3	-3	-5	-7	9	Wt(-3,-3,-5,-7,9)	-0.401845	-0.535324	-0.666494	-0.660285	3.17622e-17	10.766	0.527436	2.055	1.62	3.105	1.29	4.75	-22.0565
-3	-3	-5	-9	1	Wt(-3,-3,-5,-9,1)	-0.358802	-0.495802	-0.63971	-0.708348	0	12.1375	0.687611	2.11	1.71	3.09	1.24	4.775	-23.1118
-3	-3	-5	-9	3	Wt(-3,-3,-5,-9,3)	-0.358802	-0.495802	-0.63971	-0.708348	-1.40866e-17	12.1375	0.663197	2.11	1.71	3.09	1.24	4.775	-23.1118
-3	-3	-5	-9	5	Wt(-3,-3,-5,-9,5)	-0.358802	-0.495802	-0.63971	-0.708348	-1.40866e-17	12.1375	0.630634	2.11	1.71	3.09	1.24	4.775	-23.1118
-3	-3	-5	-9	7	Wt(-3,-3,-5,-9,7)	-0.358802	-0.495802	-0.63971	-0.708348	0	12.1375	0.593642	2.11	1.71	3.09	1.24	4.775	-23.1118
-3	-3	-5	-9	9	Wt(-3,-3,-5,-9,9)	-0.358802	-0.495802	-0.63971	-0.708348	-2.81732e-17	12.1375	0.555297	2.11	1.71	3.09	1.24	4.775	-23.1118
-3	-3	-7	-1	1	Wt(-3,-3,-7,-1,1)	-0.512017	-0.619777	-0.756978	-0.356947	-7.55595e-17	9.05118	0.664708	1.91	1.385	3.025	1.795	4.76	-22.1685
-3	-3	-7	-1	3	Wt(-3,-3,-7,-1,3)	-0.512017	-0.619777	-0.756978	-0.356947	0	9.05118	0.620159	1.91	1.385	3.025	1.795	4.76	-22.1685
-3	-3	-7	-1	5	Wt(-3,-3,-7,-1,5)	-0.512017	-0.619777	-0.756978	-0.356947	-3.77798e-17	9.05118	0.569348	1.91	1.385	3.025	1.795	4.76	-22.1685
-3	-3	-7	-1	7	Wt(-3,-3,-7,-1,7)	-0.512017	-0.619777	-0.756978	-0.356947	-3.77798e-17	9.05118	0.518638	1.91	1.385	3.025	1.795	4.76	-22.1685
-3	-3	-7	-1	9	Wt(-3,-3,-7,-1,9)	-0.512017	-0.619777	-0.756978	-0.356947	-3.77798e-17	9.05118	0.471489	1.91	1.385	3.025	1.795	4.76	-22.1685
-3	-3	-7	-3	1	Wt(-3,-3,-7,-3,1)	-0.471461	-0.592905	-0.752282	-0.477192	-3.45732e-17	9.89065	0.671648	1.995	1.605	3.01	1.445	4.79	-23.6619
-3	-3	-7	-3	3	Wt(-3,-3,-7,-3,3)	-0.471461	-0.592905	-0.752282	-0.477192	-6.91464e-17	9.89065	0.633252	1.995	1.605	3.01	1.445	4.79	-23.6619
-3	-3	-7	-3	5	Wt(-3,-3,-7,-3,5)	-0.471461	-0.592905	-0.752282	-0.477192	-3.45732e-17	9.89065	0.587768	1.995	1.605	3.01	1.445	4.79	-23.6619
-3	-3	-7	-3	7	Wt(-3,-3,-7,-3,7)	-0.471461	-0.592905	-0.752282	-0.477192	0	9.89065	0.540787	1.995	1.605	3.01	1.445	4.79	-23.6619
-3	-3	-7	-3	9	Wt(-3,-3,-7,-3,9)	-0.471461	-0.592905	-0.752282	-0.477192	3.45732e-17	9.89065	0.495799	1.995	1.605	3.01	1.445	4.79	-23.6619
-3	-3	-7	-5	1	Wt(-3,-3,-7,-5,1)	-0.428866	-0.559301	-0.733969	-0.567525	0	10.9399	0.677924	2.065	1.695	3.025	1.33	4.74	-24.8359
-3	-3	-7	-5	3	Wt(-3,-3,-7,-5,3)	-0.428866	-0.559301	-0.733969	-0.567525	-3.12572e-17	10.9399	0.645754	2.065	1.695	3.025	1.33	4.74	-24.8359
-3	-3	-7	-5	5	Wt(-3,-3,-7,-5,5)	-0.428866	-0.559301	-0.733969	-0.567525	-6.25145e-17	10.9399	0.606164	2.065	1.695	3.025	1.33	4.74	-24.8359
-3	-3	-7	-5	7	Wt(-3,-3,-7,-5,7)	-0.428866	-0.559301	-0.733969	-0.567525	3.12572e-17	10.9399	0.563764	2.065	1.695	3.025	1.33	4.74	-24.8359
-3	-3	-7	-5	9	Wt(-3,-3,-7,-5,9)	-0.428866	-0.559301	-0.733969	-0.567525	3.12572e-17	10.9399	0.521827	2.065	1.695	3.025	1.33	4.74	-24.8359
-3	-3	-7	-7	1	Wt(-3,-3,-7,-7,1)	-0.388683	-0.524771	-0.709655	-0.633825	0	12.1447	0.683086	2.065	1.625	3.075	1.305	4.755	-25.951
-3	-3	-7	-7	3	Wt(-3,-3,-7,-7,3)	-0.388683	-0.524771	-0.709655	-0.633825	-5.63128e-17	12.1447	0.656526	2.065	1.625	3.075	1.305	4.755	-25.951
-3	-3	-7	-7	5	Wt(-3,-3,-7,-7,5)	-0.388683	-0.524771	-0.709655	-0.633825	-2.81564e-17	12.1447	0.622678	2.065	1.625	3.075	1.305	4.755	-25.951
-3	-3	-7	-7	7	Wt(-3,-3,-7,-7,7)	-0.388683	-0.524771	-0.709655	-0.633825	0	12.1447	0.585166	2.065	1.625	3.075	1.305	4.755	-25.951
-3	-3	-7	-7	9	Wt(-3,-3,-7,-7,9)	-0.388683	-0.524771	-0.709655	-0.633825	-5.63128e-17	12.1447	0.546861	2.065	1.625	3.075	1.305	4.755	-25.951
-3	-3	-7	-9	1	Wt(-3,-3,-7,-9,1)	-0.352745	-0.492276	-0.683897	-0.682337	-2.53986e-17	13.4634	0.68713	2.11	1.71	3.09	1.24	4.775	-27.0201
-3	-3	-7	-9	3	Wt(-3,-3,-7,-9,3)	-0.352745	-0.492276	-0.683897	-0.682337	2.53986e-17	13.4634	0.665313	2.11	1.71	3.09	1.24	4.775	-27.0201
-3	-3	-7	-9	5	Wt(-3,-3,-7,-9,5)	-0.352745	-0.492276	-0.683897	-0.682337	-5.07973e-17	13.4634	0.636643	2.11	1.71	3.09	1.24	4.775	-27.0201
-3	-3	-7	-9	7	Wt(-3,-3,-7,-9,7)	-0.352745	-0.492276	-0.683897	-0.682337	-2.53986e-17	13.4634	0.603885	2.11	1.71	3.09	1.24	4.775	-27.0201
-3	-3	-7	-9	9	Wt(-3,-3,-7,-9,9)	-0.352745	-0.492276	-0.683897	-0.682337	-2.53986e-17	13.4634	0.569438	2.11	1.71	3.09	1.24	4.775	-27.0201
-3	-3	-9	-1	1	Wt(-3,-3,-9,-1,1)	-0.474696	-0.587133	-0.783015	-0.360589	-3.22802e-17	10.5932	0.668513	2.02	1.585	2.885	1.87	4.8	-25.943
-3	-3	-9	-1	3	Wt(-3,-3,-9,-1,3)	-0.474696	-0.587133	-0.783015	-0.360589	9.68407e-17	10.5932	0.632029	2.02	1.585	2.885	1.87	4.8	-25.943
-3	-3	-9	-1	5	Wt(-3,-3,-9,-1,5)	-0.474696	-0.587133	-0.783015	-0.360589	0	10.5932	0.589545	2.02	1.585	2.885	1.87	4.8	-25.943
-3	-3	-9	-1	7	Wt(-3,-3,-9,-1,7)	-0.474696	-0.587133	-0.783015	-0.360589	3.22802e-17	10.5932	0.545627	2.02	1.585	2.885	1.87	4.8	-25.943
-3	-3	-9	-1	9	Wt(-3,-3,-9,-1,9)	-0.474696	-0.587133	-0.783015	-0.360589	3.22802e-17	10.5932	0.50323	2.02	1.585	2.885	1.87	4.8	-25.943
-3	-3	-9	-3	1	Wt(-3,-3,-9,-3,1)	-0.442745	-0.566788	-0.777734	-0.464762	-2.99367e-17	11.4225	0.673982	1.995	1.665	2.95	1.555	4.77	-27.4513
-3	-3	-9	-3	3	Wt(-3,-3,-9,-3,3)	-0.442745	-0.566788	-0.777734	-0.464762	-2.99367e-17	11.4225	0.642006	1.995	1.665	2.95	1.555	4.77	-27.4513
-3	-3	-9	-3	5	Wt(-3,-3,-9,-3,5)	-0.442745	-0.566788	-0.777734	-0.464762	-5.98734e-17	11.4225	0.603701	1.995	1.665	2.95	1.555	4.77	-27.4513
-3	-3	-9	-3	7	Wt(-3,-3,-9,-3,7)	-0.442745	-0.566788	-0.777734	-0.464762	0	11.4225	0.563044	1.995	1.665	2.95	1.555	4.77	-27.4513
-3	-3	-9	-3	9	Wt(-3,-3,-9,-3,9)	-0.442745	-0.566788	-0.777734	-0.464762	0	11.4225	0.522862	1.995	1.665	2.95	1.555	4.77	-27.4513
-3	-3	-9	-5	1	Wt(-3,-3,-9,-5,1)	-0.408927	-0.541004	-0.761634	-0.546557	-2.74941e-17	12.4373	0.679031	2.06	1.745	3	1.345	4.74	-28.6667
-3	-3	-9	-5	3	Wt(-3,-3,-9,-5,3)	-0.408927	-0.541004	-0.761634	-0.546557	-5.49881e-17	12.4373	0.651616	2.06	1.745	3	1.345	4.74	-28.6667
-3	-3	-9	-5	5	Wt(-3,-3,-9,-5,5)	-0.408927	-0.541004	-0.761634	-0.546557	-8.24822e-17	12.4373	0.617822	2.06	1.745	3	1.345	4.74	-28.6667
-3	-3	-9	-5	7	Wt(-3,-3,-9,-5,7)	-0.408927	-0.541004	-0.761634	-0.546557	-2.74941e-17	12.4373	0.580955	2.06	1.745	3	1.345	4.74	-28.6667
-3	-3	-9	-5	9	Wt(-3,-3,-9,-5,9)	-0.408927	-0.541004	-0.761634	-0.546557	-8.24822e-17	12.4373	0.543583	2.06	1.745	3	1.345	4.74	-28.6667
-3	-3	-9	-7	1	Wt(-3,-3,-9,-7,1)	-0.376184	-0.513611	-0.740039	-0.609485	-2.51506e-17	13.5961	0.683347	2.065	1.695	3.025	1.33	4.74	-29.7895
-3	-3	-9	-7	3	Wt(-3,-3,-9,-7,3)	-0.376184	-0.513611	-0.740039	-0.609485	0	13.5961	0.66014	2.065	1.695	3.025	1.33	4.74	-29.7895
-3	-3	-9	-7	5	Wt(-3,-3,-9,-7,5)	-0.376184	-0.513611	-0.740039	-0.609485	-2.51506e-17	13.5961	0.630755	2.065	1.695	3.025	1.33	4.74	-29.7895
-3	-3	-9	-7	7	Wt(-3,-3,-9,-7,7)	-0.376184	-0.513611	-0.740039	-0.609485	-5.03013e-17	13.5961	0.597844	2.065	1.695	3.025	1.33	4.74	-29.7895
-3	-3	-9	-7	9	Wt(-3,-3,-9,-7,9)	-0.376184	-0.513611	-0.740039	-0.609485	-2.51506e-17	13.5961	0.563635	2.065	1.695	3.025	1.33	4.74	-29.7895
-3	-3	-9	-9	1	Wt(-3,-3,-9,-9,1)	-0.345995	-0.486878	-0.716476	-0.657607	-2.30032e-17	14.8654	0.686878	2.055	1.77	3.015	1.305	4.77	-30.8853
-3	-3	-9	-9	3	Wt(-3,-3,-9,-9,3)	-0.345995	-0.486878	-0.716476	-0.657607	-2.30032e-17	14.8654	0.667344	2.055	1.77	3.015	1.305	4.77	-30.8853
-3	-3	-9	-9	5	Wt(-3,-3,-9,-9,5)	-0.345995	-0.486878	-0.716476	-0.657607	0	14.8654	0.642004	2.055	1.77	3.015	1.305	4.77	-30.8853
-3	-3	-9	-9	7	Wt(-3,-3,-9,-9,7)	-0.345995	-0.486878	-0.716476	-0.657607	-2.30032e-17	14.8654	0.612933	2.055	1.77	3.015	1.305	4.77	-30.8853
-3	-3	-9	-9	9	Wt(-3,-3,-9,-9,9)	-0.345995	-0.486878	-0.716476	-0.657607	-2.30032e-17	14.8654	0.582001	2.055	1.77	3.015	1.305	4.77	-30.8853
-3	-5	-1	-1	1	Wt(-3,-5,-1,-1,1)	-0.639182	-0.792133	-0.473719	-0.259878	-5.17183e-17	6.61181	0.659991	1.91	1.205	3.19	1.865	4.81	-12.5007
-3	-5	-1	-1	3	Wt(-3,-5,-1,-1,3)	-0.639182	-0.792133	-0.473719	-0.259878	-5.17183e-17	6.61181	0.59553	1.91	1.205	3.19	1.865	4.81	-12.5007
-3	-5	-1	-1	5	Wt(-3,-5,-1,-1,5)	-0.639182	-0.792133	-0.473719	-0.259878	-5.17183e-17	6.61181	0.525531	1.91	1.205	3.19	1.865	4.81	-12.5007
-3	-5	-1	-1	7	Wt(-3,-5,-1,-1,7)	-0.639182	-0.792133	-0.473719	-0.259878	-2.58591e-17	6.61181	0.461304	1.91	1.205	3.19	1.865	4.81	-12.5007
-3	-5	-1	-1	9	Wt(-3,-5,-1,-1,9)	-0.639182	-0.792133	-0.473719	-0.259878	-2.58591e-17	6.61181	0.406393	1.91	1.205	3.19	1.865	4.81	-12.5007
-3	-5	-1	-3	1	Wt(-3,-5,-1,-3,1)	-0.581347	-0.750371	-0.508427	-0.438206	-2.33607e-17	7.31894	0.668977	2.05	1.275	3.21	1.485	4.765	-13.9314
-3	-5	-1	-3	3	Wt(-3,-5,-1,-3,3)	-0.581347	-0.750371	-0.508427	-0.438206	0	7.31894	0.613985	2.05	1.275	3.21	1.485	4.765	-13.9314
-3	-5	-1	-3	5	Wt(-3,-5,-1,-3,5)	-0.581347	-0.750371	-0.508427	-0.438206	-2.33607e-17	7.31894	0.55072	2.05	1.275	3.21	1.485	4.765	-13.9314
-3	-5	-1	-3	7	Wt(-3,-5,-1,-3,7)	-0.581347	-0.750371	-0.508427	-0.438206	-2.33607e-17	7.31894	0.489826	2.05	1.275	3.21	1.485	4.765	-13.9314
-3	-5	-1	-3	9	Wt(-3,-5,-1,-3,9)	-0.581347	-0.750371	-0.508427	-0.438206	0	7.31894	0.435816	2.05	1.275	3.21	1.485	4.765	-13.9314
-3	-5	-1	-5	1	Wt(-3,-5,-1,-5,1)	-0.514288	-0.689922	-0.517482	-0.563826	-2.05276e-17	8.32909	0.677468	2.145	1.345	3.38	1.27	4.805	-15.0984
-3	-5	-1	-5	3	Wt(-3,-5,-1,-5,3)	-0.514288	-0.689922	-0.517482	-0.563826	-2.05276e-17	8.32909	0.633151	2.145	1.345	3.38	1.27	4.805	-15.0984
-3	-5	-1	-5	5	Wt(-3,-5,-1,-5,5)	-0.514288	-0.689922	-0.517482	-0.563826	2.05276e-17	8.32909	0.578807	2.145	1.345	3.38	1.27	4.805	-15.0984
-3	-5	-1	-5	7	Wt(-3,-5,-1,-5,7)	-0.514288	-0.689922	-0.517482	-0.563826	-4.10551e-17	8.32909	0.523421	2.145	1.345	3.38	1.27	4.805	-15.0984
-3	-5	-1	-5	9	Wt(-3,-5,-1,-5,9)	-0.514288	-0.689922	-0.517482	-0.563826	-4.10551e-17	8.32909	0.471934	2.145	1.345	3.38	1.27	4.805	-15.0984
-3	-5	-1	-7	1	Wt(-3,-5,-1,-7,1)	-0.451708	-0.628597	-0.513188	-0.64789	1.79097e-17	9.54653	0.684104	2.145	1.345	3.38	1.27	4.805	-16.1524
-3	-5	-1	-7	3	Wt(-3,-5,-1,-7,3)	-0.451708	-0.628597	-0.513188	-0.64789	1.79097e-17	9.54653	0.649356	2.145	1.345	3.38	1.27	4.805	-16.1524
-3	-5	-1	-7	5	Wt(-3,-5,-1,-7,5)	-0.451708	-0.628597	-0.513188	-0.64789	-1.79097e-17	9.54653	0.604192	2.145	1.345	3.38	1.27	4.805	-16.1524
-3	-5	-1	-7	7	Wt(-3,-5,-1,-7,7)	-0.451708	-0.628597	-0.513188	-0.64789	-1.79097e-17	9.54653	0.55554	2.145	1.345	3.38	1.27	4.805	-16.1524
-3	-5	-1	-7	9	Wt(-3,-5,-1,-7,9)	-0.451708	-0.628597	-0.513188	-0.64789	0	9.54653	0.508067	2.145	1.345	3.38	1.27	4.805	-16.1524
-3	-5	-1	-9	1	Wt(-3,-5,-1,-9,1)	-0.398177	-0.573784	-0.503408	-0.703909	1.56829e-17	10.902	0.688894	2.355	1.32	3.405	1.205	4.805	-17.1797
-3	-5	-1	-9	3	Wt(-3,-5,-1,-9,3)	-0.398177	-0.573784	-0.503408	-0.703909	1.56829e-17	10.902	0.661834	2.355	1.32	3.405	1.205	4.805	-17.1797
-3	-5	-1	-9	5	Wt(-3,-5,-1,-9,5)	-0.398177	-0.573784	-0.503408	-0.703909	1.56829e-17	10.902	0.624904	2.355	1.32	3.405	1.205	4.805	-17.1797
-3	-5	-1	-9	7	Wt(-3,-5,-1,-9,7)	-0.398177	-0.573784	-0.503408	-0.703909	3.13658e-17	10.902	0.583154	2.355	1.32	3.405	1.205	4.805	-17.1797
-3	-5	-1	-9	9	Wt(-3,-5,-1,-9,9)	-0.398177	-0.573784	-0.503408	-0.703909	0	10.902	0.540551	2.355	1.32	3.405	1.205	4.805	-17.1797
-3	-5	-3	-1	1	Wt(-3,-5,-3,-1,1)	-0.600852	-0.760417	-0.594987	-0.300049	-4.4469e-17	7.68965	0.66193	1.945	1.225	3.115	1.74	4.82	-16.4528
-3	-5	-3	-1	3	Wt(-3,-5,-3,-1,3)	-0.600852	-0.760417	-0.594987	-0.300049	-4.4469e-17	7.68965	0.607755	1.945	1.225	3.115	1.74	4.82	-16.4528
-3	-5	-3	-1	5	Wt(-3,-5,-3,-1,5)	-0.600852	-0.760417	-0.594987	-0.300049	-4.4469e-17	7.68965	0.547393	1.945	1.225	3.115	1.74	4.82	-16.4528
-3	-5	-3	-1	7	Wt(-3,-5,-3,-1,7)	-0.600852	-0.760417	-0.594987	-0.300049	-4.4469e-17	7.68965	0.489564	1.945	1.225	3.115	1.74	4.82	-16.4528
-3	-5	-3	-1	9	Wt(-3,-5,-3,-1,9)	-0.600852	-0.760417	-0.594987	-0.300049	-8.89381e-17	7.68965	0.438009	1.945	1.225	3.115	1.74	4.82	-16.4528
-3	-5	-3	-3	1	Wt(-3,-5,-3,-3,1)	-0.550432	-0.722439	-0.611432	-0.44946	4.0486e-17	8.44617	0.669856	1.97	1.3	3.16	1.545	4.785	-17.9341
-3	-5	-3	-3	3	Wt(-3,-5,-3,-3,3)	-0.550432	-0.722439	-0.611432	-0.44946	0	8.44617	0.623311	1.97	1.3	3.16	1.545	4.785	-17.9341
-3	-5	-3	-3	5	Wt(-3,-5,-3,-3,5)	-0.550432	-0.722439	-0.611432	-0.44946	4.0486e-17	8.44617	0.568965	1.97	1.3	3.16	1.545	4.785	-17.9341
-3	-5	-3	-3	7	Wt(-3,-5,-3,-3,7)	-0.550432	-0.722439	-0.611432	-0.44946	0	8.44617	0.514741	1.97	1.3	3.16	1.545	4.785	-17.9341
-3	-5	-3	-3	9	Wt(-3,-5,-3,-3,9)	-0.550432	-0.722439	-0.611432	-0.44946	0	8.44617	0.46478	1.97	1.3	3.16	1.545	4.785	-17.9341
-3	-5	-3	-5	1	Wt(-3,-5,-3,-5,1)	-0.494451	-0.671884	-0.608137	-0.558657	-1.80726e-17	9.46047	0.677236	2.115	1.335	3.225	1.335	4.805	-19.1594
-3	-5	-3	-5	3	Wt(-3,-5,-3,-5,3)	-0.494451	-0.671884	-0.608137	-0.558657	0	9.46047	0.638886	2.115	1.335	3.225	1.335	4.805	-19.1594
-3	-5	-3	-5	5	Wt(-3,-5,-3,-5,5)	-0.494451	-0.671884	-0.608137	-0.558657	3.61453e-17	9.46047	0.591834	2.115	1.335	3.225	1.335	4.805	-19.1594
-3	-5	-3	-5	7	Wt(-3,-5,-3,-5,7)	-0.494451	-0.671884	-0.608137	-0.558657	-1.80726e-17	9.46047	0.542691	2.115	1.335	3.225	1.335	4.805	-19.1594
-3	-5	-3	-5	9	Wt(-3,-5,-3,-5,9)	-0.494451	-0.671884	-0.608137	-0.558657	-3.61453e-17	9.46047	0.4956	2.115	1.335	3.225	1.335	4.805	-19.1594
-3	-5	-3	-7	1	Wt(-3,-5,-3,-7,1)	-0.441537	-0.620199	-0.595003	-0.635516	-1.60402e-17	10.6592	0.683201	2.115	1.335	3.225	1.335	4.805	-20.2774
-3	-5	-3	-7	3	Wt(-3,-5,-3,-7,3)	-0.441537	-0.620199	-0.595003	-0.635516	3.20803e-17	10.6592	0.652276	2.115	1.335	3.225	1.335	4.805	-20.2774
-3	-5	-3	-7	5	Wt(-3,-5,-3,-7,5)	-0.441537	-0.620199	-0.595003	-0.635516	3.20803e-17	10.6592	0.612561	2.115	1.335	3.225	1.335	4.805	-20.2774
-3	-5	-3	-7	7	Wt(-3,-5,-3,-7,7)	-0.441537	-0.620199	-0.595003	-0.635516	-1.60402e-17	10.6592	0.569215	2.115	1.335	3.225	1.335	4.805	-20.2774
-3	-5	-3	-7	9	Wt(-3,-5,-3,-7,9)	-0.441537	-0.620199	-0.595003	-0.635516	-3.20803e-17	10.6592	0.525997	2.115	1.335	3.225	1.335	4.805	-20.2774
-3	-5	-3	-9	1	Wt(-3,-5,-3,-9,1)	-0.395015	-0.572721	-0.578222	-0.689322	-4.27895e-17	11.9872	0.687715	2.185	1.35	3.29	1.27	4.8	-21.3396
-3	-5	-3	-9	3	Wt(-3,-5,-3,-9,3)	-0.395015	-0.572721	-0.578222	-0.689322	1.42632e-17	11.9872	0.662945	2.185	1.35	3.29	1.27	4.8	-21.3396
-3	-5	-3	-9	5	Wt(-3,-5,-3,-9,5)	-0.395015	-0.572721	-0.578222	-0.689322	-1.42632e-17	11.9872	0.62986	2.185	1.35	3.29	1.27	4.8	-21.3396
-3	-5	-3	-9	7	Wt(-3,-5,-3,-9,7)	-0.395015	-0.572721	-0.578222	-0.689322	1.42632e-17	11.9872	0.592317	2.185	1.35	3.29	1.27	4.8	-21.3396
-3	-5	-3	-9	9	Wt(-3,-5,-3,-9,9)	-0.395015	-0.572721	-0.578222	-0.689322	-1.42632e-17	11.9872	0.553482	2.185	1.35	3.29	1.27	4.8	-21.3396
-3	-5	-5	-1	1	Wt(-3,-5,-5,-1,1)	-0.559532	-0.720513	-0.671539	-0.323172	3.81556e-17	8.96203	0.66489	1.89	1.25	3.1	1.825	4.825	-20.3847
-3	-5	-5	-1	3	Wt(-3,-5,-5,-1,3)	-0.559532	-0.720513	-0.671539	-0.323172	3.81556e-17	8.96203	0.619851	1.89	1.25	3.1	1.825	4.825	-20.3847
-3	-5	-5	-1	5	Wt(-3,-5,-5,-1,5)	-0.559532	-0.720513	-0.671539	-0.323172	0	8.96203	0.568486	1.89	1.25	3.1	1.825	4.825	-20.3847
-3	-5	-5	-1	7	Wt(-3,-5,-5,-1,7)	-0.559532	-0.720513	-0.671539	-0.323172	0	8.96203	0.51731	1.89	1.25	3.1	1.825	4.825	-20.3847
-3	-5	-5	-1	9	Wt(-3,-5,-5,-1,9)	-0.559532	-0.720513	-0.671539	-0.323172	0	8.96203	0.469831	1.89	1.25	3.1	1.825	4.825	-20.3847
-3	-5	-5	-3	1	Wt(-3,-5,-5,-3,1)	-0.51775	-0.689044	-0.678326	-0.450196	0	9.74069	0.671519	1.945	1.245	3.11	1.71	4.805	-21.8841
-3	-5	-5	-3	3	Wt(-3,-5,-5,-3,3)	-0.51775	-0.689044	-0.678326	-0.450196	-3.51055e-17	9.74069	0.632367	1.945	1.245	3.11	1.71	4.805	-21.8841
-3	-5	-5	-3	5	Wt(-3,-5,-5,-3,5)	-0.51775	-0.689044	-0.678326	-0.450196	0	9.74069	0.586054	1.945	1.245	3.11	1.71	4.805	-21.8841
-3	-5	-5	-3	7	Wt(-3,-5,-5,-3,7)	-0.51775	-0.689044	-0.678326	-0.450196	0	9.74069	0.53837	1.945	1.245	3.11	1.71	4.805	-21.8841
-3	-5	-5	-3	9	Wt(-3,-5,-5,-3,9)	-0.51775	-0.689044	-0.678326	-0.450196	-3.51055e-17	9.74069	0.492873	1.945	1.245	3.11	1.71	4.805	-21.8841
-3	-5	-5	-5	1	Wt(-3,-5,-5,-5,1)	-0.47214	-0.64848	-0.669901	-0.546819	-3.18319e-17	10.7424	0.677706	2.04	1.41	3.165	1.36	4.785	-23.1707
-3	-5	-5	-5	3	Wt(-3,-5,-5,-5,3)	-0.47214	-0.64848	-0.669901	-0.546819	-6.36637e-17	10.7424	0.64473	2.04	1.41	3.165	1.36	4.785	-23.1707
-3	-5	-5	-5	5	Wt(-3,-5,-5,-5,5)	-0.47214	-0.64848	-0.669901	-0.546819	-3.18319e-17	10.7424	0.604213	2.04	1.41	3.165	1.36	4.785	-23.1707
-3	-5	-5	-5	7	Wt(-3,-5,-5,-5,7)	-0.47214	-0.64848	-0.669901	-0.546819	-3.18319e-17	10.7424	0.560978	2.04	1.41	3.165	1.36	4.785	-23.1707
-3	-5	-5	-5	9	Wt(-3,-5,-5,-5,9)	-0.47214	-0.64848	-0.669901	-0.546819	-6.36637e-17	10.7424	0.518392	2.04	1.41	3.165	1.36	4.785	-23.1707
-3	-5	-5	-7	1	Wt(-3,-5,-5,-7,1)	-0.428225	-0.60622	-0.653623	-0.618172	-2.87086e-17	11.9111	0.682885	2.12	1.415	3.165	1.32	4.76	-24.279
-3	-5	-5	-7	3	Wt(-3,-5,-5,-7,3)	-0.428225	-0.60622	-0.653623	-0.618172	2.87086e-17	11.9111	0.655592	2.12	1.415	3.165	1.32	4.76	-24.279
-3	-5	-5	-7	5	Wt(-3,-5,-5,-7,5)	-0.428225	-0.60622	-0.653623	-0.618172	-2.87086e-17	11.9111	0.620847	2.12	1.415	3.165	1.32	4.76	-24.279
-3	-5	-5	-7	7	Wt(-3,-5,-5,-7,7)	-0.428225	-0.60622	-0.653623	-0.618172	0	11.9111	0.58247	2.12	1.415	3.165	1.32	4.76	-24.279
-3	-5	-5	-7	9	Wt(-3,-5,-5,-7,9)	-0.428225	-0.60622	-0.653623	-0.618172	-2.87086e-17	11.9111	0.54344	2.12	1.415	3.165	1.32	4.76	-24.279
-3	-5	-5	-9	1	Wt(-3,-5,-5,-9,1)	-0.388513	-0.566202	-0.634305	-0.670486	2.59006e-17	13.2024	0.686981	2.12	1.415	3.165	1.32	4.76	-25.3841
-3	-5	-5	-9	3	Wt(-3,-5,-5,-9,3)	-0.388513	-0.566202	-0.634305	-0.670486	-2.59006e-17	13.2024	0.664546	2.12	1.415	3.165	1.32	4.76	-25.3841
-3	-5	-5	-9	5	Wt(-3,-5,-5,-9,5)	-0.388513	-0.566202	-0.634305	-0.670486	-2.59006e-17	13.2024	0.635077	2.12	1.415	3.165	1.32	4.76	-25.3841
-3	-5	-5	-9	7	Wt(-3,-5,-5,-9,7)	-0.388513	-0.566202	-0.634305	-0.670486	-2.59006e-17	13.2024	0.601498	2.12	1.415	3.165	1.32	4.76	-25.3841
-3	-5	-5	-9	9	Wt(-3,-5,-5,-9,9)	-0.388513	-0.566202	-0.634305	-0.670486	2.59006e-17	13.2024	0.566314	2.12	1.415	3.165	1.32	4.76	-25.3841
-3	-5	-7	-1	1	Wt(-3,-5,-7,-1,1)	-0.522205	-0.682325	-0.720393	-0.336499	-3.30149e-17	10.3575	0.667819	1.87	1.35	3.035	1.845	4.805	-24.2861
-3	-5	-7	-1	3	Wt(-3,-5,-7,-1,3)	-0.522205	-0.682325	-0.720393	-0.336499	0	10.3575	0.63018	1.87	1.35	3.035	1.845	4.805	-24.2861
-3	-5	-7	-1	5	Wt(-3,-5,-7,-1,5)	-0.522205	-0.682325	-0.720393	-0.336499	-3.30149e-17	10.3575	0.586521	1.87	1.35	3.035	1.845	4.805	-24.2861
-3	-5	-7	-1	7	Wt(-3,-5,-7,-1,7)	-0.522205	-0.682325	-0.720393	-0.336499	-3.30149e-17	10.3575	0.541631	1.87	1.35	3.035	1.845	4.805	-24.2861
-3	-5	-7	-1	9	Wt(-3,-5,-7,-1,9)	-0.522205	-0.682325	-0.720393	-0.336499	-3.30149e-17	10.3575	0.498535	1.87	1.35	3.035	1.845	4.805	-24.2861
-3	-5	-7	-3	1	Wt(-3,-5,-7,-3,1)	-0.487909	-0.656985	-0.722381	-0.446345	-3.06838e-17	11.1444	0.673298	2.02	1.285	3.085	1.65	4.775	-25.8107
-3	-5	-7	-3	3	Wt(-3,-5,-7,-3,3)	-0.487909	-0.656985	-0.722381	-0.446345	0	11.1444	0.640168	2.02	1.285	3.085	1.65	4.775	-25.8107
-3	-5	-7	-3	5	Wt(-3,-5,-7,-3,5)	-0.487909	-0.656985	-0.722381	-0.446345	-3.06838e-17	11.1444	0.60063	2.02	1.285	3.085	1.65	4.775	-25.8107
-3	-5	-7	-3	7	Wt(-3,-5,-7,-3,7)	-0.487909	-0.656985	-0.722381	-0.446345	-3.06838e-17	11.1444	0.558897	2.02	1.285	3.085	1.65	4.775	-25.8107
-3	-5	-7	-3	9	Wt(-3,-5,-7,-3,9)	-0.487909	-0.656985	-0.722381	-0.446345	-6.13677e-17	11.1444	0.517892	2.02	1.285	3.085	1.65	4.775	-25.8107
-3	-5	-7	-5	1	Wt(-3,-5,-7,-5,1)	-0.450729	-0.62472	-0.712399	-0.532944	2.81968e-17	12.1273	0.678455	2.07	1.395	3.135	1.395	4.785	-27.1443
-3	-5	-7	-5	3	Wt(-3,-5,-7,-5,3)	-0.450729	-0.62472	-0.712399	-0.532944	-2.81968e-17	12.1273	0.649997	2.07	1.395	3.135	1.395	4.785	-27.1443
-3	-5	-7	-5	5	Wt(-3,-5,-7,-5,5)	-0.450729	-0.62472	-0.712399	-0.532944	0	12.1273	0.615027	2.07	1.395	3.135	1.395	4.785	-27.1443
-3	-5	-7	-5	7	Wt(-3,-5,-7,-5,7)	-0.450729	-0.62472	-0.712399	-0.532944	2.81968e-17	12.1273	0.577069	2.07	1.395	3.135	1.395	4.785	-27.1443
-3	-5	-7	-5	9	Wt(-3,-5,-7,-5,9)	-0.450729	-0.62472	-0.712399	-0.532944	2.81968e-17	12.1273	0.538806	2.07	1.395	3.135	1.395	4.785	-27.1443
-3	-5	-7	-7	1	Wt(-3,-5,-7,-7,1)	-0.414303	-0.590423	-0.695817	-0.599581	0	13.2628	0.682904	2.12	1.415	3.165	1.32	4.76	-28.2581
-3	-5	-7	-7	3	Wt(-3,-5,-7,-7,3)	-0.414303	-0.590423	-0.695817	-0.599581	0	13.2628	0.658813	2.12	1.415	3.165	1.32	4.76	-28.2581
-3	-5	-7	-7	5	Wt(-3,-5,-7,-7,5)	-0.414303	-0.590423	-0.695817	-0.599581	0	13.2628	0.628378	2.12	1.415	3.165	1.32	4.76	-28.2581
-3	-5	-7	-7	7	Wt(-3,-5,-7,-7,7)	-0.414303	-0.590423	-0.695817	-0.599581	0	13.2628	0.594433	2.12	1.415	3.165	1.32	4.76	-28.2581
-3	-5	-7	-7	9	Wt(-3,-5,-7,-7,9)	-0.414303	-0.590423	-0.695817	-0.599581	0	13.2628	0.559326	2.12	1.415	3.165	1.32	4.76	-28.2581
-3	-5	-7	-9	1	Wt(-3,-5,-7,-9,1)	-0.380536	-0.557017	-0.676363	-0.65043	-2.35583e-17	14.5151	0.686557	2.12	1.415	3.165	1.32	4.76	-29.3632
-3	-5	-7	-9	3	Wt(-3,-5,-7,-9,3)	-0.380536	-0.557017	-0.676363	-0.65043	0	14.5151	0.666303	2.12	1.415	3.165	1.32	4.76	-29.3632
-3	-5	-7	-9	5	Wt(-3,-5,-7,-9,5)	-0.380536	-0.557017	-0.676363	-0.65043	0	14.5151	0.640063	2.12	1.415	3.165	1.32	4.76	-29.3632
-3	-5	-7	-9	7	Wt(-3,-5,-7,-9,7)	-0.380536	-0.557017	-0.676363	-0.65043	0	14.5151	0.610059	2.12	1.415	3.165	1.32	4.76	-29.3632
-3	-5	-7	-9	9	Wt(-3,-5,-7,-9,9)	-0.380536	-0.557017	-0.676363	-0.65043	0	14.5151	0.57827	2.12	1.415	3.165	1.32	4.76	-29.3632
-3	-5	-9	-1	1	Wt(-3,-5,-9,-1,1)	-0.49042	-0.64881	-0.752547	-0.344329	0	11.8326	0.670386	1.93	1.37	2.99	1.885	4.825	-28.1356
-3	-5	-9	-1	3	Wt(-3,-5,-9,-1,3)	-0.49042	-0.64881	-0.752547	-0.344329	0	11.8326	0.638566	1.93	1.37	2.99	1.885	4.825	-28.1356
-3	-5	-9	-1	5	Wt(-3,-5,-9,-1,5)	-0.49042	-0.64881	-0.752547	-0.344329	2.88992e-17	11.8326	0.60125	1.93	1.37	2.99	1.885	4.825	-28.1356
-3	-5	-9	-1	7	Wt(-3,-5,-9,-1,7)	-0.49042	-0.64881	-0.752547	-0.344329	2.88992e-17	11.8326	0.561952	1.93	1.37	2.99	1.885	4.825	-28.1356
-3	-5	-9	-1	9	Wt(-3,-5,-9,-1,9)	-0.49042	-0.64881	-0.752547	-0.344329	0	11.8326	0.523161	1.93	1.37	2.99	1.885	4.825	-28.1356
-3	-5	-9	-3	1	Wt(-3,-5,-9,-3,1)	-0.462065	-0.628454	-0.752216	-0.440799	0	12.6208	0.674944	1.995	1.345	3.045	1.71	4.745	-29.6892
-3	-5	-9	-3	3	Wt(-3,-5,-9,-3,3)	-0.462065	-0.628454	-0.752216	-0.440799	-2.70943e-17	12.6208	0.646605	1.995	1.345	3.045	1.71	4.745	-29.6892
-3	-5	-9	-3	5	Wt(-3,-5,-9,-3,5)	-0.462065	-0.628454	-0.752216	-0.440799	2.70943e-17	12.6208	0.61262	1.995	1.345	3.045	1.71	4.745	-29.6892
-3	-5	-9	-3	7	Wt(-3,-5,-9,-3,7)	-0.462065	-0.628454	-0.752216	-0.440799	-2.70943e-17	12.6208	0.576071	1.995	1.345	3.045	1.71	4.745	-29.6892
-3	-5	-9	-3	9	Wt(-3,-5,-9,-3,9)	-0.462065	-0.628454	-0.752216	-0.440799	-2.70943e-17	12.6208	0.5393	1.995	1.345	3.045	1.71	4.745	-29.6892
-3	-5	-9	-5	1	Wt(-3,-5,-9,-5,1)	-0.431425	-0.602643	-0.742259	-0.519167	-5.03475e-17	13.5837	0.67927	2.135	1.5	3.05	1.395	4.76	-31.0392
-3	-5	-9	-5	3	Wt(-3,-5,-9,-5,3)	-0.431425	-0.602643	-0.742259	-0.519167	0	13.5837	0.654517	2.135	1.5	3.05	1.395	4.76	-31.0392
-3	-5	-9	-5	5	Wt(-3,-5,-9,-5,5)	-0.431425	-0.602643	-0.742259	-0.519167	-2.51738e-17	13.5837	0.624144	2.135	1.5	3.05	1.395	4.76	-31.0392
-3	-5	-9	-5	7	Wt(-3,-5,-9,-5,7)	-0.431425	-0.602643	-0.742259	-0.519167	0	13.5837	0.59075	2.135	1.5	3.05	1.395	4.76	-31.0392
-3	-5	-9	-5	9	Wt(-3,-5,-9,-5,9)	-0.431425	-0.602643	-0.742259	-0.519167	-5.03475e-17	13.5837	0.556454	2.135	1.5	3.05	1.395	4.76	-31.0392
-3	-5	-9	-7	1	Wt(-3,-5,-9,-7,1)	-0.400974	-0.574705	-0.726611	-0.581551	-2.32829e-17	14.6868	0.683096	2.185	1.52	3.08	1.32	4.735	-32.1791
-3	-5	-9	-7	3	Wt(-3,-5,-9,-7,3)	-0.400974	-0.574705	-0.726611	-0.581551	0	14.6868	0.66174	2.185	1.52	3.08	1.32	4.735	-32.1791
-3	-5	-9	-7	5	Wt(-3,-5,-9,-7,5)	-0.400974	-0.574705	-0.726611	-0.581551	-2.32829e-17	14.6868	0.634952	2.185	1.52	3.08	1.32	4.735	-32.1791
-3	-5	-9	-7	7	Wt(-3,-5,-9,-7,7)	-0.400974	-0.574705	-0.726611	-0.581551	-2.32829e-17	14.6868	0.60486	2.185	1.52	3.08	1.32	4.735	-32.1791
-3	-5	-9	-7	9	Wt(-3,-5,-9,-7,9)	-0.400974	-0.574705	-0.726611	-0.581551	-2.32829e-17	14.6868	0.573307	2.185	1.52	3.08	1.32	4.735	-32.1791
-3	-5	-9	-9	1	Wt(-3,-5,-9,-9,1)	-0.372158	-0.546823	-0.708165	-0.630779	-2.15049e-17	15.9011	0.686338	2.185	1.52	3.08	1.32	4.735	-33.2852
-3	-5	-9	-9	3	Wt(-3,-5,-9,-9,3)	-0.372158	-0.546823	-0.708165	-0.630779	4.30098e-17	15.9011	0.668034	2.185	1.52	3.08	1.32	4.735	-33.2852
-3	-5	-9	-9	5	Wt(-3,-5,-9,-9,5)	-0.372158	-0.546823	-0.708165	-0.630779	0	15.9011	0.644602	2.185	1.52	3.08	1.32	4.735	-33.2852
-3	-5	-9	-9	7	Wt(-3,-5,-9,-9,7)	-0.372158	-0.546823	-0.708165	-0.630779	-2.15049e-17	15.9011	0.617746	2.185	1.52	3.08	1.32	4.735	-33.2852
-3	-5	-9	-9	9	Wt(-3,-5,-9,-9,9)	-0.372158	-0.546823	-0.708165	-0.630779	-4.30098e-17	15.9011	0.589029	2.185	1.52	3.08	1.32	4.735	-33.2852
-3	-7	-1	-1	1	Wt(-3,-7,-1,-1,1)	-0.608282	-0.81439	-0.455197	-0.239973	0	8.22075	0.667467	1.96	1.14	3.33	2.015	4.775	-14.4273
-3	-7	-1	-1	3	Wt(-3,-7,-1,-1,3)	-0.608282	-0.81439	-0.455197	-0.239973	4.15962e-17	8.22075	0.618625	1.96	1.14	3.33	2.015	4.775	-14.4273
-3	-7	-1	-1	5	Wt(-3,-7,-1,-1,5)	-0.608282	-0.81439	-0.455197	-0.239973	4.15962e-17	8.22075	0.562472	1.96	1.14	3.33	2.015	4.775	-14.4273
-3	-7	-1	-1	7	Wt(-3,-7,-1,-1,7)	-0.608282	-0.81439	-0.455197	-0.239973	0	8.22075	0.507154	1.96	1.14	3.33	2.015	4.775	-14.4273
-3	-7	-1	-1	9	Wt(-3,-7,-1,-1,9)	-0.608282	-0.81439	-0.455197	-0.239973	0	8.22075	0.456699	1.96	1.14	3.33	2.015	4.775	-14.4273
-3	-7	-1	-3	1	Wt(-3,-7,-1,-3,1)	-0.567814	-0.784605	-0.488989	-0.390836	0	8.85718	0.673377	2.005	1.22	3.185	1.625	4.815	-15.952
-3	-7	-1	-3	3	Wt(-3,-7,-1,-3,3)	-0.567814	-0.784605	-0.488989	-0.390836	-1.93036e-17	8.85718	0.630394	2.005	1.22	3.185	1.625	4.815	-15.952
-3	-7	-1	-3	5	Wt(-3,-7,-1,-3,5)	-0.567814	-0.784605	-0.488989	-0.390836	1.93036e-17	8.85718	0.579102	2.005	1.22	3.185	1.625	4.815	-15.952
-3	-7	-1	-3	7	Wt(-3,-7,-1,-3,7)	-0.567814	-0.784605	-0.488989	-0.390836	-1.93036e-17	8.85718	0.526908	2.005	1.22	3.185	1.625	4.815	-15.952
-3	-7	-1	-3	9	Wt(-3,-7,-1,-3,9)	-0.567814	-0.784605	-0.488989	-0.390836	0	8.85718	0.478014	2.005	1.22	3.185	1.625	4.815	-15.952
-3	-7	-1	-5	1	Wt(-3,-7,-1,-5,1)	-0.518184	-0.738038	-0.504061	-0.507194	0	9.76085	0.679321	2.165	1.275	3.31	1.335	4.86	-17.173
-3	-7	-1	-5	3	Wt(-3,-7,-1,-5,3)	-0.518184	-0.738038	-0.504061	-0.507194	-1.75165e-17	9.76085	0.643121	2.165	1.275	3.31	1.335	4.86	-17.173
-3	-7	-1	-5	5	Wt(-3,-7,-1,-5,5)	-0.518184	-0.738038	-0.504061	-0.507194	1.75165e-17	9.76085	0.598062	2.165	1.275	3.31	1.335	4.86	-17.173
-3	-7	-1	-5	7	Wt(-3,-7,-1,-5,7)	-0.518184	-0.738038	-0.504061	-0.507194	0	9.76085	0.550392	2.165	1.275	3.31	1.335	4.86	-17.173
-3	-7	-1	-5	9	Wt(-3,-7,-1,-5,9)	-0.518184	-0.738038	-0.504061	-0.507194	-1.75165e-17	9.76085	0.504205	2.165	1.275	3.31	1.335	4.86	-17.173
-3	-7	-1	-7	1	Wt(-3,-7,-1,-7,1)	-0.468153	-0.68644	-0.507034	-0.592675	-3.14719e-17	10.8653	0.684417	2.34	1.265	3.315	1.26	4.83	-18.2298
-3	-7	-1	-7	3	Wt(-3,-7,-1,-7,3)	-0.468153	-0.68644	-0.507034	-0.592675	-4.72078e-17	10.8653	0.654704	2.34	1.265	3.315	1.26	4.83	-18.2298
-3	-7	-1	-7	5	Wt(-3,-7,-1,-7,5)	-0.468153	-0.68644	-0.507034	-0.592675	-4.72078e-17	10.8653	0.616179	2.34	1.265	3.315	1.26	4.83	-18.2298
-3	-7	-1	-7	7	Wt(-3,-7,-1,-7,7)	-0.468153	-0.68644	-0.507034	-0.592675	-3.14719e-17	10.8653	0.57379	2.34	1.265	3.315	1.26	4.83	-18.2298
-3	-7	-1	-7	9	Wt(-3,-7,-1,-7,9)	-0.468153	-0.68644	-0.507034	-0.592675	-1.57359e-17	10.8653	0.531228	2.34	1.265	3.315	1.26	4.83	-18.2298
-3	-7	-1	-9	1	Wt(-3,-7,-1,-9,1)	-0.422204	-0.6366	-0.503319	-0.6544	5.64475e-17	12.1157	0.688442	2.375	1.28	3.415	1.22	4.82	-19.2397
-3	-7	-1	-9	3	Wt(-3,-7,-1,-9,3)	-0.422204	-0.6366	-0.503319	-0.6544	1.41119e-17	12.1157	0.664326	2.375	1.28	3.415	1.22	4.82	-19.2397
-3	-7	-1	-9	5	Wt(-3,-7,-1,-9,5)	-0.422204	-0.6366	-0.503319	-0.6544	4.23356e-17	12.1157	0.631897	2.375	1.28	3.415	1.22	4.82	-19.2397
-3	-7	-1	-9	7	Wt(-3,-7,-1,-9,7)	-0.422204	-0.6366	-0.503319	-0.6544	1.41119e-17	12.1157	0.594908	2.375	1.28	3.415	1.22	4.82	-19.2397
-3	-7	-1	-9	9	Wt(-3,-7,-1,-9,9)	-0.422204	-0.6366	-0.503319	-0.6544	1.41119e-17	12.1157	0.556481	2.375	1.28	3.415	1.22	4.82	-19.2397
-3	-7	-3	-1	1	Wt(-3,-7,-3,-1,1)	-0.583648	-0.790298	-0.560976	-0.277154	3.69953e-17	9.24311	0.667756	1.96	1.205	3.13	1.825	4.8	-18.4378
-3	-7	-3	-1	3	Wt(-3,-7,-3,-1,3)	-0.583648	-0.790298	-0.560976	-0.277154	-3.69953e-17	9.24311	0.624976	1.96	1.205	3.13	1.825	4.8	-18.4378
-3	-7	-3	-1	5	Wt(-3,-7,-3,-1,5)	-0.583648	-0.790298	-0.560976	-0.277154	0	9.24311	0.575474	1.96	1.205	3.13	1.825	4.8	-18.4378
-3	-7	-3	-1	7	Wt(-3,-7,-3,-1,7)	-0.583648	-0.790298	-0.560976	-0.277154	-3.69953e-17	9.24311	0.525525	1.96	1.205	3.13	1.825	4.8	-18.4378
-3	-7	-3	-1	9	Wt(-3,-7,-3,-1,9)	-0.583648	-0.790298	-0.560976	-0.277154	-3.69953e-17	9.24311	0.478692	1.96	1.205	3.13	1.825	4.8	-18.4378
-3	-7	-3	-3	1	Wt(-3,-7,-3,-3,1)	-0.546013	-0.761047	-0.581325	-0.407813	0	9.93278	0.673323	2	1.2	3.145	1.7	4.82	-19.9415
-3	-7	-3	-3	3	Wt(-3,-7,-3,-3,3)	-0.546013	-0.761047	-0.581325	-0.407813	3.44266e-17	9.93278	0.635562	2	1.2	3.145	1.7	4.82	-19.9415
-3	-7	-3	-3	5	Wt(-3,-7,-3,-3,5)	-0.546013	-0.761047	-0.581325	-0.407813	0	9.93278	0.59045	2	1.2	3.145	1.7	4.82	-19.9415
-3	-7	-3	-3	7	Wt(-3,-7,-3,-3,7)	-0.546013	-0.761047	-0.581325	-0.407813	0	9.93278	0.543609	2	1.2	3.145	1.7	4.82	-19.9415
-3	-7	-3	-3	9	Wt(-3,-7,-3,-3,9)	-0.546013	-0.761047	-0.581325	-0.407813	0	9.93278	0.498604	2	1.2	3.145	1.7	4.82	-19.9415
-3	-7	-3	-5	1	Wt(-3,-7,-3,-5,1)	-0.502247	-0.719805	-0.586174	-0.510311	0	10.8554	0.678787	2.155	1.28	3.21	1.425	4.74	-21.2523
-3	-7	-3	-5	3	Wt(-3,-7,-3,-5,3)	-0.502247	-0.719805	-0.586174	-0.510311	6.30009e-17	10.8554	0.646566	2.155	1.28	3.21	1.425	4.74	-21.2523
-3	-7	-3	-5	5	Wt(-3,-7,-3,-5,5)	-0.502247	-0.719805	-0.586174	-0.510311	0	10.8554	0.606714	2.155	1.28	3.21	1.425	4.74	-21.2523
-3	-7	-3	-5	7	Wt(-3,-7,-3,-5,7)	-0.502247	-0.719805	-0.586174	-0.510311	0	10.8554	0.563967	2.155	1.28	3.21	1.425	4.74	-21.2523
-3	-7	-3	-5	9	Wt(-3,-7,-3,-5,9)	-0.502247	-0.719805	-0.586174	-0.510311	3.15004e-17	10.8554	0.521686	2.155	1.28	3.21	1.425	4.74	-21.2523
-3	-7	-3	-7	1	Wt(-3,-7,-3,-7,1)	-0.458365	-0.674759	-0.581417	-0.587808	0	11.9573	0.683529	2.34	1.265	3.315	1.26	4.83	-22.3691
-3	-7	-3	-7	3	Wt(-3,-7,-3,-7,3)	-0.458365	-0.674759	-0.581417	-0.587808	0	11.9573	0.656591	2.34	1.265	3.315	1.26	4.83	-22.3691
-3	-7	-3	-7	5	Wt(-3,-7,-3,-7,5)	-0.458365	-0.674759	-0.581417	-0.587808	-5.71954e-17	11.9573	0.622141	2.34	1.265	3.315	1.26	4.83	-22.3691
-3	-7	-3	-7	7	Wt(-3,-7,-3,-7,7)	-0.458365	-0.674759	-0.581417	-0.587808	0	11.9573	0.583971	2.34	1.265	3.315	1.26	4.83	-22.3691
-3	-7	-3	-7	9	Wt(-3,-7,-3,-7,9)	-0.458365	-0.674759	-0.581417	-0.587808	2.85977e-17	11.9573	0.545065	2.34	1.265	3.315	1.26	4.83	-22.3691
-3	-7	-3	-9	1	Wt(-3,-7,-3,-9,1)	-0.417591	-0.630823	-0.571582	-0.645585	-2.59181e-17	13.1935	0.687377	2.34	1.265	3.315	1.26	4.83	-23.4122
-3	-7	-3	-9	3	Wt(-3,-7,-3,-9,3)	-0.417591	-0.630823	-0.571582	-0.645585	-2.59181e-17	13.1935	0.665073	2.34	1.265	3.315	1.26	4.83	-23.4122
-3	-7	-3	-9	5	Wt(-3,-7,-3,-9,5)	-0.417591	-0.630823	-0.571582	-0.645585	0	13.1935	0.635672	2.34	1.265	3.315	1.26	4.83	-23.4122
-3	-7	-3	-9	7	Wt(-3,-7,-3,-9,7)	-0.417591	-0.630823	-0.571582	-0.645585	-2.59181e-17	13.1935	0.602107	2.34	1.265	3.315	1.26	4.83	-23.4122
-3	-7	-3	-9	9	Wt(-3,-7,-3,-9,9)	-0.417591	-0.630823	-0.571582	-0.645585	2.59181e-17	13.1935	0.566902	2.34	1.265	3.315	1.26	4.83	-23.4122
-3	-7	-5	-1	1	Wt(-3,-7,-5,-1,1)	-0.55432	-0.757878	-0.634693	-0.301704	-3.27437e-17	10.4433	0.669048	1.945	1.225	3.115	1.74	4.82	-22.3857
-3	-7	-5	-1	3	Wt(-3,-7,-5,-1,3)	-0.55432	-0.757878	-0.634693	-0.301704	0	10.4433	0.632052	1.945	1.225	3.115	1.74	4.82	-22.3857
-3	-7	-5	-1	5	Wt(-3,-7,-5,-1,5)	-0.55432	-0.757878	-0.634693	-0.301704	-3.27437e-17	10.4433	0.588896	1.945	1.225	3.115	1.74	4.82	-22.3857
-3	-7	-5	-1	7	Wt(-3,-7,-5,-1,7)	-0.55432	-0.757878	-0.634693	-0.301704	0	10.4433	0.544332	1.945	1.225	3.115	1.74	4.82	-22.3857
-3	-7	-5	-1	9	Wt(-3,-7,-5,-1,9)	-0.55432	-0.757878	-0.634693	-0.301704	0	10.4433	0.501406	1.945	1.225	3.115	1.74	4.82	-22.3857
-3	-7	-5	-3	1	Wt(-3,-7,-5,-3,1)	-0.521088	-0.731723	-0.646457	-0.415583	3.06288e-17	11.1644	0.674025	1.945	1.245	3.11	1.71	4.805	-23.8938
-3	-7	-5	-3	3	Wt(-3,-7,-5,-3,3)	-0.521088	-0.731723	-0.646457	-0.415583	3.06288e-17	11.1644	0.641149	1.945	1.245	3.11	1.71	4.805	-23.8938
-3	-7	-5	-3	5	Wt(-3,-7,-5,-3,5)	-0.521088	-0.731723	-0.646457	-0.415583	3.06288e-17	11.1644	0.601774	1.945	1.245	3.11	1.71	4.805	-23.8938
-3	-7	-5	-3	7	Wt(-3,-7,-5,-3,7)	-0.521088	-0.731723	-0.646457	-0.415583	0	11.1644	0.560118	1.945	1.245	3.11	1.71	4.805	-23.8938
-3	-7	-5	-3	9	Wt(-3,-7,-5,-3,9)	-0.521088	-0.731723	-0.646457	-0.415583	0	11.1644	0.519125	1.945	1.245	3.11	1.71	4.805	-23.8938
-3	-7	-5	-5	1	Wt(-3,-7,-5,-5,1)	-0.483547	-0.696723	-0.645655	-0.5069	-2.82827e-17	12.0905	0.678862	2.155	1.28	3.21	1.425	4.74	-25.272
-3	-7	-5	-5	3	Wt(-3,-7,-5,-5,3)	-0.483547	-0.696723	-0.645655	-0.5069	-2.82827e-17	12.0905	0.650412	2.155	1.28	3.21	1.425	4.74	-25.272
-3	-7	-5	-5	5	Wt(-3,-7,-5,-5,5)	-0.483547	-0.696723	-0.645655	-0.5069	0	12.0905	0.615368	2.155	1.28	3.21	1.425	4.74	-25.272
-3	-7	-5	-5	7	Wt(-3,-7,-5,-5,7)	-0.483547	-0.696723	-0.645655	-0.5069	0	12.0905	0.577294	2.155	1.28	3.21	1.425	4.74	-25.272
-3	-7	-5	-5	9	Wt(-3,-7,-5,-5,9)	-0.483547	-0.696723	-0.645655	-0.5069	-2.82827e-17	12.0905	0.538904	2.155	1.28	3.21	1.425	4.74	-25.272
-3	-7	-5	-7	1	Wt(-3,-7,-5,-7,1)	-0.445803	-0.658514	-0.637046	-0.578034	-1.03791e-16	13.1785	0.683131	2.16	1.325	3.225	1.335	4.775	-26.4159
-3	-7	-5	-7	3	Wt(-3,-7,-5,-7,3)	-0.445803	-0.658514	-0.637046	-0.578034	-2.59477e-17	13.1785	0.658916	2.16	1.325	3.225	1.335	4.775	-26.4159
-3	-7	-5	-7	5	Wt(-3,-7,-5,-7,5)	-0.445803	-0.658514	-0.637046	-0.578034	-5.18954e-17	13.1785	0.62827	2.16	1.325	3.225	1.335	4.775	-26.4159
-3	-7	-5	-7	7	Wt(-3,-7,-5,-7,7)	-0.445803	-0.658514	-0.637046	-0.578034	-2.59477e-17	13.1785	0.594082	2.16	1.325	3.225	1.335	4.775	-26.4159
-3	-7	-5	-7	9	Wt(-3,-7,-5,-7,9)	-0.445803	-0.658514	-0.637046	-0.578034	-2.59477e-17	13.1785	0.558741	2.16	1.325	3.225	1.335	4.775	-26.4159
-3	-7	-5	-9	1	Wt(-3,-7,-5,-9,1)	-0.410216	-0.620686	-0.62427	-0.632765	-2.37604e-17	14.3917	0.68669	2.275	1.32	3.23	1.295	4.775	-27.5231
-3	-7	-5	-9	3	Wt(-3,-7,-5,-9,3)	-0.410216	-0.620686	-0.62427	-0.632765	-4.75207e-17	14.3917	0.666258	2.275	1.32	3.23	1.295	4.775	-27.5231
-3	-7	-5	-9	5	Wt(-3,-7,-5,-9,5)	-0.410216	-0.620686	-0.62427	-0.632765	2.37604e-17	14.3917	0.639745	2.275	1.32	3.23	1.295	4.775	-27.5231
-3	-7	-5	-9	7	Wt(-3,-7,-5,-9,7)	-0.410216	-0.620686	-0.62427	-0.632765	2.37604e-17	14.3917	0.609432	2.275	1.32	3.23	1.295	4.775	-27.5231
-3	-7	-5	-9	9	Wt(-3,-7,-5,-9,9)	-0.410216	-0.620686	-0.62427	-0.632765	2.37604e-17	14.3917	0.577341	2.275	1.32	3.23	1.295	4.775	-27.5231
-3	-7	-7	-1	1	Wt(-3,-7,-7,-1,1)	-0.525464	-0.724456	-0.685936	-0.317821	2.90603e-17	11.767	0.670678	1.93	1.23	3.11	1.785	4.82	-26.3262
-3	-7	-7	-1	3	Wt(-3,-7,-7,-1,3)	-0.525464	-0.724456	-0.685936	-0.317821	-2.90603e-17	11.767	0.638708	1.93	1.23	3.11	1.785	4.82	-26.3262
-3	-7	-7	-1	5	Wt(-3,-7,-7,-1,5)	-0.525464	-0.724456	-0.685936	-0.317821	0	11.767	0.60117	1.93	1.23	3.11	1.785	4.82	-26.3262
-3	-7	-7	-1	7	Wt(-3,-7,-7,-1,7)	-0.525464	-0.724456	-0.685936	-0.317821	0	11.767	0.561639	1.93	1.23	3.11	1.785	4.82	-26.3262
-3	-7	-7	-1	9	Wt(-3,-7,-7,-1,9)	-0.525464	-0.724456	-0.685936	-0.317821	0	11.767	0.52264	1.93	1.23	3.11	1.785	4.82	-26.3262
-3	-7	-7	-3	1	Wt(-3,-7,-7,-3,1)	-0.496709	-0.701998	-0.692502	-0.4181	-2.73431e-17	12.5059	0.675031	1.945	1.245	3.11	1.71	4.805	-27.8267
-3	-7	-7	-3	3	Wt(-3,-7,-7,-3,3)	-0.496709	-0.701998	-0.692502	-0.4181	-2.73431e-17	12.5059	0.646393	1.945	1.245	3.11	1.71	4.805	-27.8267
-3	-7	-7	-3	5	Wt(-3,-7,-7,-3,5)	-0.496709	-0.701998	-0.692502	-0.4181	-2.73431e-17	12.5059	0.612033	1.945	1.245	3.11	1.71	4.805	-27.8267
-3	-7	-7	-3	7	Wt(-3,-7,-7,-3,7)	-0.496709	-0.701998	-0.692502	-0.4181	2.73431e-17	12.5059	0.575112	1.945	1.245	3.11	1.71	4.805	-27.8267
-3	-7	-7	-3	9	Wt(-3,-7,-7,-3,9)	-0.496709	-0.701998	-0.692502	-0.4181	-5.46863e-17	12.5059	0.538018	1.945	1.245	3.11	1.71	4.805	-27.8267
-3	-7	-7	-5	1	Wt(-3,-7,-7,-5,1)	-0.464764	-0.672784	-0.688852	-0.500301	0	13.4273	0.679252	2.13	1.31	3.12	1.5	4.745	-29.2401
-3	-7	-7	-5	3	Wt(-3,-7,-7,-5,3)	-0.464764	-0.672784	-0.688852	-0.500301	-2.5467e-17	13.4273	0.654134	2.13	1.31	3.12	1.5	4.745	-29.2401
-3	-7	-7	-5	5	Wt(-3,-7,-7,-5,5)	-0.464764	-0.672784	-0.688852	-0.500301	0	13.4273	0.623308	2.13	1.31	3.12	1.5	4.745	-29.2401
-3	-7	-7	-5	7	Wt(-3,-7,-7,-5,7)	-0.464764	-0.672784	-0.688852	-0.500301	0	13.4273	0.589458	2.13	1.31	3.12	1.5	4.745	-29.2401
-3	-7	-7	-5	9	Wt(-3,-7,-7,-5,9)	-0.464764	-0.672784	-0.688852	-0.500301	-2.5467e-17	13.4273	0.554754	2.13	1.31	3.12	1.5	4.745	-29.2401
-3	-7	-7	-7	1	Wt(-3,-7,-7,-7,1)	-0.432472	-0.640729	-0.678688	-0.566122	-7.07672e-17	14.4962	0.683039	2.14	1.375	3.175	1.335	4.775	-30.4277
-3	-7	-7	-7	3	Wt(-3,-7,-7,-7,3)	-0.432472	-0.640729	-0.678688	-0.566122	0	14.4962	0.661311	2.14	1.375	3.175	1.335	4.775	-30.4277
-3	-7	-7	-7	5	Wt(-3,-7,-7,-7,5)	-0.432472	-0.640729	-0.678688	-0.566122	0	14.4962	0.63405	2.14	1.375	3.175	1.335	4.775	-30.4277
-3	-7	-7	-7	7	Wt(-3,-7,-7,-7,7)	-0.432472	-0.640729	-0.678688	-0.566122	0	14.4962	0.603465	2.14	1.375	3.175	1.335	4.775	-30.4277
-3	-7	-7	-7	9	Wt(-3,-7,-7,-7,9)	-0.432472	-0.640729	-0.678688	-0.566122	0	14.4962	0.571459	2.14	1.375	3.175	1.335	4.775	-30.4277
-3	-7	-7	-9	1	Wt(-3,-7,-7,-9,1)	-0.401585	-0.608485	-0.664903	-0.618237	-2.18045e-17	15.6826	0.686277	2.12	1.415	3.165	1.32	4.76	-31.5334
-3	-7	-7	-9	3	Wt(-3,-7,-7,-9,3)	-0.401585	-0.608485	-0.664903	-0.618237	0	15.6826	0.667626	2.12	1.415	3.165	1.32	4.76	-31.5334
-3	-7	-7	-9	5	Wt(-3,-7,-7,-9,5)	-0.401585	-0.608485	-0.664903	-0.618237	-4.3609e-17	15.6826	0.643742	2.12	1.415	3.165	1.32	4.76	-31.5334
-3	-7	-7	-9	7	Wt(-3,-7,-7,-9,7)	-0.401585	-0.608485	-0.664903	-0.618237	-2.18045e-17	15.6826	0.616397	2.12	1.415	3.165	1.32	4.76	-31.5334
-3	-7	-7	-9	9	Wt(-3,-7,-7,-9,9)	-0.401585	-0.608485	-0.664903	-0.618237	0	15.6826	0.58721	2.12	1.415	3.165	1.32	4.76	-31.5334
-3	-7	-9	-1	1	Wt(-3,-7,-9,-1,1)	-0.499151	-0.69322	-0.722053	-0.328511	2.59507e-17	13.177	0.67232	1.94	1.29	3.035	1.86	4.84	-30.2236
-3	-7	-9	-1	3	Wt(-3,-7,-9,-1,3)	-0.499151	-0.69322	-0.722053	-0.328511	0	13.177	0.644547	1.94	1.29	3.035	1.86	4.84	-30.2236
-3	-7	-9	-1	5	Wt(-3,-7,-9,-1,5)	-0.499151	-0.69322	-0.722053	-0.328511	0	13.177	0.611801	1.94	1.29	3.035	1.86	4.84	-30.2236
-3	-7	-9	-1	7	Wt(-3,-7,-9,-1,7)	-0.499151	-0.69322	-0.722053	-0.328511	-2.59507e-17	13.177	0.57677	1.94	1.29	3.035	1.86	4.84	-30.2236
-3	-7	-9	-1	9	Wt(-3,-7,-9,-1,9)	-0.499151	-0.69322	-0.722053	-0.328511	0	13.177	0.541512	1.94	1.29	3.035	1.86	4.84	-30.2236
-3	-7	-9	-3	1	Wt(-3,-7,-9,-3,1)	-0.474374	-0.674223	-0.725527	-0.417769	-2.45554e-17	13.9257	0.676106	2.02	1.285	3.085	1.65	4.775	-31.7579
-3	-7	-9	-3	3	Wt(-3,-7,-9,-3,3)	-0.474374	-0.674223	-0.725527	-0.417769	2.45554e-17	13.9257	0.651026	2.02	1.285	3.085	1.65	4.775	-31.7579
-3	-7	-9	-3	5	Wt(-3,-7,-9,-3,5)	-0.474374	-0.674223	-0.725527	-0.417769	0	13.9257	0.620924	2.02	1.285	3.085	1.65	4.775	-31.7579
-3	-7	-9	-3	7	Wt(-3,-7,-9,-3,7)	-0.474374	-0.674223	-0.725527	-0.417769	0	13.9257	0.588182	2.02	1.285	3.085	1.65	4.775	-31.7579
-3	-7	-9	-3	9	Wt(-3,-7,-9,-3,9)	-0.474374	-0.674223	-0.725527	-0.417769	4.91107e-17	13.9257	0.554714	2.02	1.285	3.085	1.65	4.775	-31.7579
-3	-7	-9	-5	1	Wt(-3,-7,-9,-5,1)	-0.447134	-0.64991	-0.720602	-0.492421	-2.30452e-17	14.8383	0.679781	2.13	1.31	3.12	1.5	4.745	-33.172
-3	-7	-9	-5	3	Wt(-3,-7,-9,-5,3)	-0.447134	-0.64991	-0.720602	-0.492421	-2.30452e-17	14.8383	0.657516	2.13	1.31	3.12	1.5	4.745	-33.172
-3	-7	-9	-5	5	Wt(-3,-7,-9,-5,5)	-0.447134	-0.64991	-0.720602	-0.492421	-4.60904e-17	14.8383	0.630296	2.13	1.31	3.12	1.5	4.745	-33.172
-3	-7	-9	-5	7	Wt(-3,-7,-9,-5,7)	-0.447134	-0.64991	-0.720602	-0.492421	2.30452e-17	14.8383	0.600159	2.13	1.31	3.12	1.5	4.745	-33.172
-3	-7	-9	-5	9	Wt(-3,-7,-9,-5,9)	-0.447134	-0.64991	-0.720602	-0.492421	2.30452e-17	14.8383	0.568833	2.13	1.31	3.12	1.5	4.745	-33.172
-3	-7	-9	-7	1	Wt(-3,-7,-9,-7,1)	-0.419439	-0.623049	-0.710134	-0.553656	-2.15247e-17	15.8865	0.683128	2.205	1.385	3.15	1.335	4.75	-34.3981
-3	-7	-9	-7	3	Wt(-3,-7,-9,-7,3)	-0.419439	-0.623049	-0.710134	-0.553656	-4.30494e-17	15.8865	0.66359	2.205	1.385	3.15	1.335	4.75	-34.3981
-3	-7	-9	-7	5	Wt(-3,-7,-9,-7,5)	-0.419439	-0.623049	-0.710134	-0.553656	-2.15247e-17	15.8865	0.639271	2.205	1.385	3.15	1.335	4.75	-34.3981
-3	-7	-9	-7	7	Wt(-3,-7,-9,-7,7)	-0.419439	-0.623049	-0.710134	-0.553656	-4.30494e-17	15.8865	0.611867	2.205	1.385	3.15	1.335	4.75	-34.3981
-3	-7	-9	-7	9	Wt(-3,-7,-9,-7,9)	-0.419439	-0.623049	-0.710134	-0.553656	-2.15247e-17	15.8865	0.582895	2.205	1.385	3.15	1.335	4.75	-34.3981
-3	-7	-9	-9	1	Wt(-3,-7,-9,-9,1)	-0.392608	-0.595624	-0.696413	-0.603369	-2.00614e-17	17.0452	0.686052	2.12	1.415	3.165	1.32	4.76	-35.5125
-3	-7	-9	-9	3	Wt(-3,-7,-9,-9,3)	-0.392608	-0.595624	-0.696413	-0.603369	-2.00614e-17	17.0452	0.669028	2.12	1.415	3.165	1.32	4.76	-35.5125
-3	-7	-9	-9	5	Wt(-3,-7,-9,-9,5)	-0.392608	-0.595624	-0.696413	-0.603369	-2.00614e-17	17.0452	0.647475	2.12	1.415	3.165	1.32	4.76	-35.5125
-3	-7	-9	-9	7	Wt(-3,-7,-9,-9,7)	-0.392608	-0.595624	-0.696413	-0.603369	-2.00614e-17	17.0452	0.622778	2.12	1.415	3.165	1.32	4.76	-35.5125
-3	-7	-9	-9	9	Wt(-3,-7,-9,-9,9)	-0.392608	-0.595624	-0.696413	-0.603369	-2.00614e-17	17.0452	0.596236	2.12	1.415	3.165	1.32	4.76	-35.5125
-3	-9	-1	-1	1	Wt(-3,-9,-1,-1,1)	-0.585523	-0.826575	-0.44125	-0.225824	3.46708e-17	9.86282	0.672363	1.96	1.14	3.33	2.015	4.775	-16.3286
-3	-9	-1	-1	3	Wt(-3,-9,-1,-1,3)	-0.585523	-0.826575	-0.44125	-0.225824	3.46708e-17	9.86282	0.633913	1.96	1.14	3.33	2.015	4.775	-16.3286
-3	-9	-1	-1	5	Wt(-3,-9,-1,-1,5)	-0.585523	-0.826575	-0.44125	-0.225824	0	9.86282	0.588276	1.96	1.14	3.33	2.015	4.775	-16.3286
-3	-9	-1	-1	7	Wt(-3,-9,-1,-1,7)	-0.585523	-0.826575	-0.44125	-0.225824	-3.46708e-17	9.86282	0.541111	1.96	1.14	3.33	2.015	4.775	-16.3286
-3	-9	-1	-1	9	Wt(-3,-9,-1,-1,9)	-0.585523	-0.826575	-0.44125	-0.225824	3.46708e-17	9.86282	0.49595	1.96	1.14	3.33	2.015	4.775	-16.3286
-3	-9	-1	-3	1	Wt(-3,-9,-1,-3,1)	-0.555472	-0.804632	-0.472908	-0.355683	0	10.4481	0.676564	2.12	1.165	3.19	1.68	4.785	-17.9136
-3	-9	-1	-3	3	Wt(-3,-9,-1,-3,3)	-0.555472	-0.804632	-0.472908	-0.355683	-3.27287e-17	10.4481	0.641972	2.12	1.165	3.19	1.68	4.785	-17.9136
-3	-9	-1	-3	5	Wt(-3,-9,-1,-3,5)	-0.555472	-0.804632	-0.472908	-0.355683	-3.27287e-17	10.4481	0.599841	2.12	1.165	3.19	1.68	4.785	-17.9136
-3	-9	-1	-3	7	Wt(-3,-9,-1,-3,7)	-0.555472	-0.804632	-0.472908	-0.355683	-3.27287e-17	10.4481	0.555289	2.12	1.165	3.19	1.68	4.785	-17.9136
-3	-9	-1	-3	9	Wt(-3,-9,-1,-3,9)	-0.555472	-0.804632	-0.472908	-0.355683	0	10.4481	0.511778	2.12	1.165	3.19	1.68	4.785	-17.9136
-3	-9	-1	-5	1	Wt(-3,-9,-1,-5,1)	-0.517523	-0.768556	-0.490698	-0.461873	3.03427e-17	11.2696	0.680935	2.325	1.18	3.325	1.41	4.805	-19.1668
-3	-9	-1	-5	3	Wt(-3,-9,-1,-5,3)	-0.517523	-0.768556	-0.490698	-0.461873	3.03427e-17	11.2696	0.650867	2.325	1.18	3.325	1.41	4.805	-19.1668
-3	-9	-1	-5	5	Wt(-3,-9,-1,-5,5)	-0.517523	-0.768556	-0.490698	-0.461873	-3.03427e-17	11.2696	0.613154	2.325	1.18	3.325	1.41	4.805	-19.1668
-3	-9	-1	-5	7	Wt(-3,-9,-1,-5,7)	-0.517523	-0.768556	-0.490698	-0.461873	0	11.2696	0.572165	2.325	1.18	3.325	1.41	4.805	-19.1668
-3	-9	-1	-5	9	Wt(-3,-9,-1,-5,9)	-0.517523	-0.768556	-0.490698	-0.461873	3.03427e-17	11.2696	0.531133	2.325	1.18	3.325	1.41	4.805	-19.1668
-3	-9	-1	-7	1	Wt(-3,-9,-1,-7,1)	-0.477272	-0.726034	-0.498281	-0.545113	0	12.2802	0.684918	2.34	1.265	3.315	1.26	4.83	-20.2637
-3	-9	-1	-7	3	Wt(-3,-9,-1,-7,3)	-0.477272	-0.726034	-0.498281	-0.545113	0	12.2802	0.659372	2.34	1.265	3.315	1.26	4.83	-20.2637
-3	-9	-1	-7	5	Wt(-3,-9,-1,-7,5)	-0.477272	-0.726034	-0.498281	-0.545113	-2.78458e-17	12.2802	0.626371	2.34	1.265	3.315	1.26	4.83	-20.2637
-3	-9	-1	-7	7	Wt(-3,-9,-1,-7,7)	-0.477272	-0.726034	-0.498281	-0.545113	0	12.2802	0.589467	2.34	1.265	3.315	1.26	4.83	-20.2637
-3	-9	-1	-7	9	Wt(-3,-9,-1,-7,9)	-0.477272	-0.726034	-0.498281	-0.545113	-2.78458e-17	12.2802	0.551532	2.34	1.265	3.315	1.26	4.83	-20.2637
-3	-9	-1	-9	1	Wt(-3,-9,-1,-9,1)	-0.438313	-0.682461	-0.499212	-0.608985	-2.54482e-17	13.4372	0.688278	2.375	1.28	3.415	1.22	4.82	-21.2868
-3	-9	-1	-9	3	Wt(-3,-9,-1,-9,3)	-0.438313	-0.682461	-0.499212	-0.608985	0	13.4372	0.666848	2.375	1.28	3.415	1.22	4.82	-21.2868
-3	-9	-1	-9	5	Wt(-3,-9,-1,-9,5)	-0.438313	-0.682461	-0.499212	-0.608985	0	13.4372	0.638386	2.375	1.28	3.415	1.22	4.82	-21.2868
-3	-9	-1	-9	7	Wt(-3,-9,-1,-9,7)	-0.438313	-0.682461	-0.499212	-0.608985	-2.54482e-17	13.4372	0.605685	2.375	1.28	3.415	1.22	4.82	-21.2868
-3	-9	-1	-9	9	Wt(-3,-9,-1,-9,9)	-0.438313	-0.682461	-0.499212	-0.608985	-2.54482e-17	13.4372	0.571183	2.375	1.28	3.415	1.22	4.82	-21.2868
-3	-9	-3	-1	1	Wt(-3,-9,-3,-1,1)	-0.568951	-0.808109	-0.534457	-0.259733	-6.30736e-17	10.8429	0.67193	2.03	1.175	3.165	1.74	4.8	-20.3877
-3	-9	-3	-1	3	Wt(-3,-9,-3,-1,3)	-0.568951	-0.808109	-0.534457	-0.259733	-3.15368e-17	10.8429	0.637239	2.03	1.175	3.165	1.74	4.8	-20.3877
-3	-9	-3	-1	5	Wt(-3,-9,-3,-1,5)	-0.568951	-0.808109	-0.534457	-0.259733	0	10.8429	0.596187	2.03	1.175	3.165	1.74	4.8	-20.3877
-3	-9	-3	-1	7	Wt(-3,-9,-3,-1,7)	-0.568951	-0.808109	-0.534457	-0.259733	3.15368e-17	10.8429	0.553226	2.03	1.175	3.165	1.74	4.8	-20.3877
-3	-9	-3	-1	9	Wt(-3,-9,-3,-1,9)	-0.568951	-0.808109	-0.534457	-0.259733	-3.15368e-17	10.8429	0.511353	2.03	1.175	3.165	1.74	4.8	-20.3877
-3	-9	-3	-3	1	Wt(-3,-9,-3,-3,1)	-0.539833	-0.785368	-0.556059	-0.374987	-5.95685e-17	11.4809	0.676048	2.03	1.175	3.165	1.74	4.8	-21.9044
-3	-9	-3	-3	3	Wt(-3,-9,-3,-3,3)	-0.539833	-0.785368	-0.556059	-0.374987	0	11.4809	0.644807	2.03	1.175	3.165	1.74	4.8	-21.9044
-3	-9	-3	-3	5	Wt(-3,-9,-3,-3,5)	-0.539833	-0.785368	-0.556059	-0.374987	-2.97843e-17	11.4809	0.606981	2.03	1.175	3.165	1.74	4.8	-21.9044
-3	-9	-3	-3	7	Wt(-3,-9,-3,-3,7)	-0.539833	-0.785368	-0.556059	-0.374987	-2.97843e-17	11.4809	0.566564	2.03	1.175	3.165	1.74	4.8	-21.9044
-3	-9	-3	-3	9	Wt(-3,-9,-3,-3,9)	-0.539833	-0.785368	-0.556059	-0.374987	-5.95685e-17	11.4809	0.526437	2.03	1.175	3.165	1.74	4.8	-21.9044
-3	-9	-3	-5	1	Wt(-3,-9,-3,-5,1)	-0.505017	-0.751972	-0.565572	-0.469951	-2.77349e-17	12.3293	0.680222	2.27	1.2	3.21	1.475	4.77	-23.2632
-3	-9	-3	-5	3	Wt(-3,-9,-3,-5,3)	-0.505017	-0.751972	-0.565572	-0.469951	0	12.3293	0.652853	2.27	1.2	3.21	1.475	4.77	-23.2632
-3	-9	-3	-5	5	Wt(-3,-9,-3,-5,5)	-0.505017	-0.751972	-0.565572	-0.469951	0	12.3293	0.61887	2.27	1.2	3.21	1.475	4.77	-23.2632
-3	-9	-3	-5	7	Wt(-3,-9,-3,-5,7)	-0.505017	-0.751972	-0.565572	-0.469951	0	12.3293	0.581686	2.27	1.2	3.21	1.475	4.77	-23.2632
-3	-9	-3	-5	9	Wt(-3,-9,-3,-5,9)	-0.505017	-0.751972	-0.565572	-0.469951	-5.54699e-17	12.3293	0.543956	2.27	1.2	3.21	1.475	4.77	-23.2632
-3	-9	-3	-7	1	Wt(-3,-9,-3,-7,1)	-0.468629	-0.713654	-0.56654	-0.545638	2.56184e-17	13.3479	0.68403	2.34	1.265	3.315	1.26	4.83	-24.4031
-3	-9	-3	-7	3	Wt(-3,-9,-3,-7,3)	-0.468629	-0.713654	-0.56654	-0.545638	0	13.3479	0.660494	2.34	1.265	3.315	1.26	4.83	-24.4031
-3	-9	-3	-7	5	Wt(-3,-9,-3,-7,5)	-0.468629	-0.713654	-0.56654	-0.545638	0	13.3479	0.630527	2.34	1.265	3.315	1.26	4.83	-24.4031
-3	-9	-3	-7	7	Wt(-3,-9,-3,-7,7)	-0.468629	-0.713654	-0.56654	-0.545638	-2.56184e-17	13.3479	0.596931	2.34	1.265	3.315	1.26	4.83	-24.4031
-3	-9	-3	-7	9	Wt(-3,-9,-3,-7,9)	-0.468629	-0.713654	-0.56654	-0.545638	-2.56184e-17	13.3479	0.562051	2.34	1.265	3.315	1.26	4.83	-24.4031
-3	-9	-3	-9	1	Wt(-3,-9,-3,-9,1)	-0.433345	-0.674459	-0.562111	-0.604932	0	14.5009	0.687289	2.34	1.265	3.315	1.26	4.83	-25.4461
-3	-9	-3	-9	3	Wt(-3,-9,-3,-9,3)	-0.433345	-0.674459	-0.562111	-0.604932	0	14.5009	0.667264	2.34	1.265	3.315	1.26	4.83	-25.4461
-3	-9	-3	-9	5	Wt(-3,-9,-3,-9,5)	-0.433345	-0.674459	-0.562111	-0.604932	0	14.5009	0.641158	2.34	1.265	3.315	1.26	4.83	-25.4461
-3	-9	-3	-9	7	Wt(-3,-9,-3,-9,7)	-0.433345	-0.674459	-0.562111	-0.604932	2.35814e-17	14.5009	0.611205	2.34	1.265	3.315	1.26	4.83	-25.4461
-3	-9	-3	-9	9	Wt(-3,-9,-3,-9,9)	-0.433345	-0.674459	-0.562111	-0.604932	-2.35814e-17	14.5009	0.579404	2.34	1.265	3.315	1.26	4.83	-25.4461
-3	-9	-5	-1	1	Wt(-3,-9,-5,-1,1)	-0.547634	-0.782005	-0.603946	-0.284132	-2.85321e-17	11.9848	0.672327	1.96	1.205	3.13	1.825	4.8	-24.3588
-3	-9	-5	-1	3	Wt(-3,-9,-5,-1,3)	-0.547634	-0.782005	-0.603946	-0.284132	-5.70641e-17	11.9848	0.641426	1.96	1.205	3.13	1.825	4.8	-24.3588
-3	-9	-5	-1	5	Wt(-3,-9,-5,-1,5)	-0.547634	-0.782005	-0.603946	-0.284132	-5.70641e-17	11.9848	0.604869	1.96	1.205	3.13	1.825	4.8	-24.3588
-3	-9	-5	-1	7	Wt(-3,-9,-5,-1,7)	-0.547634	-0.782005	-0.603946	-0.284132	-2.85321e-17	11.9848	0.566111	1.96	1.205	3.13	1.825	4.8	-24.3588
-3	-9	-5	-1	9	Wt(-3,-9,-5,-1,9)	-0.547634	-0.782005	-0.603946	-0.284132	-2.85321e-17	11.9848	0.527651	1.96	1.205	3.13	1.825	4.8	-24.3588
-3	-9	-5	-3	1	Wt(-3,-9,-5,-3,1)	-0.520761	-0.760499	-0.61834	-0.386638	2.70138e-17	12.6584	0.676176	2	1.2	3.145	1.7	4.82	-25.8794
-3	-9	-5	-3	3	Wt(-3,-9,-5,-3,3)	-0.520761	-0.760499	-0.61834	-0.386638	0	12.6584	0.648244	2	1.2	3.145	1.7	4.82	-25.8794
-3	-9	-5	-3	5	Wt(-3,-9,-5,-3,5)	-0.520761	-0.760499	-0.61834	-0.386638	0	12.6584	0.614538	2	1.2	3.145	1.7	4.82	-25.8794
-3	-9	-5	-3	7	Wt(-3,-9,-5,-3,7)	-0.520761	-0.760499	-0.61834	-0.386638	0	12.6584	0.578146	2	1.2	3.145	1.7	4.82	-25.8794
-3	-9	-5	-3	9	Wt(-3,-9,-5,-3,9)	-0.520761	-0.760499	-0.61834	-0.386638	0	12.6584	0.541432	2	1.2	3.145	1.7	4.82	-25.8794
-3	-9	-5	-5	1	Wt(-3,-9,-5,-5,1)	-0.489697	-0.730858	-0.622502	-0.472128	2.52923e-17	13.52	0.680022	2.27	1.2	3.21	1.475	4.77	-27.2882
-3	-9	-5	-5	3	Wt(-3,-9,-5,-5,3)	-0.489697	-0.730858	-0.622502	-0.472128	-2.52923e-17	13.52	0.655327	2.27	1.2	3.21	1.475	4.77	-27.2882
-3	-9	-5	-5	5	Wt(-3,-9,-5,-5,5)	-0.489697	-0.730858	-0.622502	-0.472128	0	13.52	0.62489	2.27	1.2	3.21	1.475	4.77	-27.2882
-3	-9	-5	-5	7	Wt(-3,-9,-5,-5,7)	-0.489697	-0.730858	-0.622502	-0.472128	0	13.52	0.591356	2.27	1.2	3.21	1.475	4.77	-27.2882
-3	-9	-5	-5	9	Wt(-3,-9,-5,-5,9)	-0.489697	-0.730858	-0.622502	-0.472128	-2.52923e-17	13.52	0.556884	2.27	1.2	3.21	1.475	4.77	-27.2882
-3	-9	-5	-7	1	Wt(-3,-9,-5,-7,1)	-0.457437	-0.697273	-0.619504	-0.541553	-2.35242e-17	14.5362	0.683552	2.27	1.28	3.225	1.335	4.78	-28.47
-3	-9	-5	-7	3	Wt(-3,-9,-5,-7,3)	-0.457437	-0.697273	-0.619504	-0.541553	-4.70484e-17	14.5362	0.662051	2.27	1.28	3.225	1.335	4.78	-28.47
-3	-9	-5	-7	5	Wt(-3,-9,-5,-7,5)	-0.457437	-0.697273	-0.619504	-0.541553	-2.35242e-17	14.5362	0.634985	2.27	1.28	3.225	1.335	4.78	-28.47
-3	-9	-5	-7	7	Wt(-3,-9,-5,-7,7)	-0.457437	-0.697273	-0.619504	-0.541553	0	14.5362	0.60455	2.27	1.28	3.225	1.335	4.78	-28.47
-3	-9	-5	-7	9	Wt(-3,-9,-5,-7,9)	-0.457437	-0.697273	-0.619504	-0.541553	2.35242e-17	14.5362	0.572646	2.27	1.28	3.225	1.335	4.78	-28.47
-3	-9	-5	-9	1	Wt(-3,-9,-5,-9,1)	-0.425981	-0.662768	-0.611995	-0.597123	0	15.6769	0.686623	2.295	1.28	3.24	1.31	4.79	-29.5662
-3	-9	-5	-9	3	Wt(-3,-9,-5,-9,3)	-0.425981	-0.662768	-0.611995	-0.597123	-4.36248e-17	15.6769	0.668074	2.295	1.28	3.24	1.31	4.79	-29.5662
-3	-9	-5	-9	5	Wt(-3,-9,-5,-9,5)	-0.425981	-0.662768	-0.611995	-0.597123	-2.18124e-17	15.6769	0.644253	2.295	1.28	3.24	1.31	4.79	-29.5662
-3	-9	-5	-9	7	Wt(-3,-9,-5,-9,7)	-0.425981	-0.662768	-0.611995	-0.597123	-2.18124e-17	15.6769	0.616939	2.295	1.28	3.24	1.31	4.79	-29.5662
-3	-9	-5	-9	9	Wt(-3,-9,-5,-9,9)	-0.425981	-0.662768	-0.611995	-0.597123	-2.18124e-17	15.6769	0.587755	2.295	1.28	3.24	1.31	4.79	-29.5662
-3	-9	-7	-1	1	Wt(-3,-9,-7,-1,1)	-0.525225	-0.753555	-0.655356	-0.30153	-5.16282e-17	13.2467	0.673146	1.96	1.205	3.13	1.825	4.8	-28.3104
-3	-9	-7	-1	3	Wt(-3,-9,-7,-1,3)	-0.525225	-0.753555	-0.655356	-0.30153	0	13.2467	0.645728	1.96	1.205	3.13	1.825	4.8	-28.3104
-3	-9	-7	-1	5	Wt(-3,-9,-7,-1,5)	-0.525225	-0.753555	-0.655356	-0.30153	-5.16282e-17	13.2467	0.613284	1.96	1.205	3.13	1.825	4.8	-28.3104
-3	-9	-7	-1	7	Wt(-3,-9,-7,-1,7)	-0.525225	-0.753555	-0.655356	-0.30153	-2.58141e-17	13.2467	0.57848	1.96	1.205	3.13	1.825	4.8	-28.3104
-3	-9	-7	-1	9	Wt(-3,-9,-7,-1,9)	-0.525225	-0.753555	-0.655356	-0.30153	-2.58141e-17	13.2467	0.543373	1.96	1.205	3.13	1.825	4.8	-28.3104
-3	-9	-7	-3	1	Wt(-3,-9,-7,-3,1)	-0.501024	-0.734132	-0.664833	-0.393237	0	13.9438	0.676655	1.945	1.225	3.115	1.74	4.82	-29.8346
-3	-9	-7	-3	3	Wt(-3,-9,-7,-3,3)	-0.501024	-0.734132	-0.664833	-0.393237	2.45235e-17	13.9438	0.651743	1.945	1.225	3.115	1.74	4.82	-29.8346
-3	-9	-7	-3	5	Wt(-3,-9,-7,-3,5)	-0.501024	-0.734132	-0.664833	-0.393237	-2.45235e-17	13.9438	0.621764	1.945	1.225	3.115	1.74	4.82	-29.8346
-3	-9	-7	-3	7	Wt(-3,-9,-7,-3,7)	-0.501024	-0.734132	-0.664833	-0.393237	-2.45235e-17	13.9438	0.589097	1.945	1.225	3.115	1.74	4.82	-29.8346
-3	-9	-7	-3	9	Wt(-3,-9,-7,-3,9)	-0.501024	-0.734132	-0.664833	-0.393237	0	13.9438	0.555664	1.945	1.225	3.115	1.74	4.82	-29.8346
-3	-9	-7	-5	1	Wt(-3,-9,-7,-5,1)	-0.473654	-0.708372	-0.665713	-0.47077	0	14.8101	0.680134	2.15	1.26	3.17	1.5	4.745	-31.2841
-3	-9	-7	-5	3	Wt(-3,-9,-7,-5,3)	-0.473654	-0.708372	-0.665713	-0.47077	2.3089e-17	14.8101	0.657906	2.15	1.26	3.17	1.5	4.745	-31.2841
-3	-9	-7	-5	5	Wt(-3,-9,-7,-5,5)	-0.473654	-0.708372	-0.665713	-0.47077	0	14.8101	0.630676	2.15	1.26	3.17	1.5	4.745	-31.2841
-3	-9	-7	-5	7	Wt(-3,-9,-7,-5,7)	-0.473654	-0.708372	-0.665713	-0.47077	-4.6178e-17	14.8101	0.600495	2.15	1.26	3.17	1.5	4.745	-31.2841
-3	-9	-7	-5	9	Wt(-3,-9,-7,-5,9)	-0.473654	-0.708372	-0.665713	-0.47077	-2.3089e-17	14.8101	0.569108	2.15	1.26	3.17	1.5	4.745	-31.2841
-3	-9	-7	-7	1	Wt(-3,-9,-7,-7,1)	-0.445291	-0.67933	-0.660536	-0.534906	2.1618e-17	15.8179	0.683354	2.325	1.285	3.185	1.35	4.765	-32.5047
-3	-9	-7	-7	3	Wt(-3,-9,-7,-7,3)	-0.445291	-0.67933	-0.660536	-0.534906	0	15.8179	0.663771	2.325	1.285	3.185	1.35	4.765	-32.5047
-3	-9	-7	-7	5	Wt(-3,-9,-7,-7,5)	-0.445291	-0.67933	-0.660536	-0.534906	4.32359e-17	15.8179	0.639355	2.325	1.285	3.185	1.35	4.765	-32.5047
-3	-9	-7	-7	7	Wt(-3,-9,-7,-7,7)	-0.445291	-0.67933	-0.660536	-0.534906	-2.1618e-17	15.8179	0.611825	2.325	1.285	3.185	1.35	4.765	-32.5047
-3	-9	-7	-7	9	Wt(-3,-9,-7,-7,9)	-0.445291	-0.67933	-0.660536	-0.534906	0	15.8179	0.582717	2.325	1.285	3.185	1.35	4.765	-32.5047
-3	-9	-7	-9	1	Wt(-3,-9,-7,-9,1)	-0.417442	-0.649281	-0.651479	-0.587303	-2.01837e-17	16.9419	0.686199	2.295	1.28	3.24	1.31	4.79	-33.6245
-3	-9	-7	-9	3	Wt(-3,-9,-7,-9,3)	-0.417442	-0.649281	-0.651479	-0.587303	2.01837e-17	16.9419	0.669086	2.295	1.28	3.24	1.31	4.79	-33.6245
-3	-9	-7	-9	5	Wt(-3,-9,-7,-9,5)	-0.417442	-0.649281	-0.651479	-0.587303	2.01837e-17	16.9419	0.647387	2.295	1.28	3.24	1.31	4.79	-33.6245
-3	-9	-7	-9	7	Wt(-3,-9,-7,-9,7)	-0.417442	-0.649281	-0.651479	-0.587303	0	16.9419	0.622513	2.295	1.28	3.24	1.31	4.79	-33.6245
-3	-9	-7	-9	9	Wt(-3,-9,-7,-9,9)	-0.417442	-0.649281	-0.651479	-0.587303	0	16.9419	0.595786	2.295	1.28	3.24	1.31	4.79	-33.6245
-3	-9	-9	-1	1	Wt(-3,-9,-9,-1,1)	-0.503627	-0.725607	-0.693572	-0.313978	0	14.5975	0.674135	1.955	1.22	3.105	1.825	4.825	-32.2587
-3	-9	-9	-1	3	Wt(-3,-9,-9,-1,3)	-0.503627	-0.725607	-0.693572	-0.313978	0	14.5975	0.649776	1.955	1.22	3.105	1.825	4.825	-32.2587
-3	-9	-9	-1	5	Wt(-3,-9,-9,-1,5)	-0.503627	-0.725607	-0.693572	-0.313978	-2.34254e-17	14.5975	0.620956	1.955	1.22	3.105	1.825	4.825	-32.2587
-3	-9	-9	-1	7	Wt(-3,-9,-9,-1,7)	-0.503627	-0.725607	-0.693572	-0.313978	-4.68508e-17	14.5975	0.589738	1.955	1.22	3.105	1.825	4.825	-32.2587
-3	-9	-9	-1	9	Wt(-3,-9,-9,-1,9)	-0.503627	-0.725607	-0.693572	-0.313978	-2.34254e-17	14.5975	0.557797	1.955	1.22	3.105	1.825	4.825	-32.2587
-3	-9	-9	-3	1	Wt(-3,-9,-9,-3,1)	-0.482062	-0.708458	-0.699764	-0.396618	-2.23351e-17	15.31	0.677297	1.945	1.245	3.11	1.71	4.805	-33.7693
-3	-9	-9	-3	3	Wt(-3,-9,-9,-3,3)	-0.482062	-0.708458	-0.699764	-0.396618	-2.23351e-17	15.31	0.65504	1.945	1.245	3.11	1.71	4.805	-33.7693
-3	-9	-9	-3	5	Wt(-3,-9,-9,-3,5)	-0.482062	-0.708458	-0.699764	-0.396618	-4.46702e-17	15.31	0.628329	1.945	1.245	3.11	1.71	4.805	-33.7693
-3	-9	-9	-3	7	Wt(-3,-9,-9,-3,7)	-0.482062	-0.708458	-0.699764	-0.396618	2.23351e-17	15.31	0.599004	1.945	1.245	3.11	1.71	4.805	-33.7693
-3	-9	-9	-3	9	Wt(-3,-9,-9,-3,9)	-0.482062	-0.708458	-0.699764	-0.396618	0	15.31	0.568621	1.945	1.245	3.11	1.71	4.805	-33.7693
-3	-9	-9	-5	1	Wt(-3,-9,-9,-5,1)	-0.458028	-0.686263	-0.698714	-0.467431	-2.11394e-17	16.176	0.680421	2.02	1.285	3.085	1.65	4.775	-35.2314
-3	-9	-9	-5	3	Wt(-3,-9,-9,-5,3)	-0.458028	-0.686263	-0.698714	-0.467431	-4.22788e-17	16.176	0.660387	2.02	1.285	3.085	1.65	4.775	-35.2314
-3	-9	-9	-5	5	Wt(-3,-9,-9,-5,5)	-0.458028	-0.686263	-0.698714	-0.467431	0	16.176	0.635981	2.02	1.285	3.085	1.65	4.775	-35.2314
-3	-9	-9	-5	7	Wt(-3,-9,-9,-5,7)	-0.458028	-0.686263	-0.698714	-0.467431	0	16.176	0.608801	2.02	1.285	3.085	1.65	4.775	-35.2314
-3	-9	-9	-5	9	Wt(-3,-9,-9,-5,9)	-0.458028	-0.686263	-0.698714	-0.467431	0	16.176	0.580253	2.02	1.285	3.085	1.65	4.775	-35.2314
-3	-9	-9	-7	1	Wt(-3,-9,-9,-7,1)	-0.433127	-0.66127	-0.692478	-0.52702	-1.9913e-17	17.1723	0.683335	2.29	1.285	3.15	1.425	4.725	-36.4833
-3	-9	-9	-7	3	Wt(-3,-9,-9,-7,3)	-0.433127	-0.66127	-0.692478	-0.52702	-3.9826e-17	17.1723	0.665496	2.29	1.285	3.15	1.425	4.725	-36.4833
-3	-9	-9	-7	5	Wt(-3,-9,-9,-7,5)	-0.433127	-0.66127	-0.692478	-0.52702	-1.9913e-17	17.1723	0.643439	2.29	1.285	3.15	1.425	4.725	-36.4833
-3	-9	-9	-7	7	Wt(-3,-9,-9,-7,7)	-0.433127	-0.66127	-0.692478	-0.52702	0	17.1723	0.618517	2.29	1.285	3.15	1.425	4.725	-36.4833
-3	-9	-9	-7	9	Wt(-3,-9,-9,-7,9)	-0.433127	-0.66127	-0.692478	-0.52702	-3.9826e-17	17.1723	0.591974	2.29	1.285	3.15	1.425	4.725	-36.4833
-3	-9	-9	-9	1	Wt(-3,-9,-9,-9,1)	-0.408507	-0.63521	-0.682832	-0.576616	-3.74179e-17	18.2774	0.685948	2.315	1.34	3.15	1.335	4.755	-37.629
-3	-9	-9	-9	3	Wt(-3,-9,-9,-9,3)	-0.408507	-0.63521	-0.682832	-0.576616	-3.74179e-17	18.2774	0.670176	2.315	1.34	3.15	1.335	4.755	-37.629
-3	-9	-9	-9	5	Wt(-3,-9,-9,-9,5)	-0.408507	-0.63521	-0.682832	-0.576616	0	18.2774	0.650395	2.315	1.34	3.15	1.335	4.755	-37.629
-3	-9	-9	-9	7	Wt(-3,-9,-9,-9,7)	-0.408507	-0.63521	-0.682832	-0.576616	0	18.2774	0.627732	2.315	1.34	3.15	1.335	4.755	-37.629
-3	-9	-9	-9	9	Wt(-3,-9,-9,-9,9)	-0.408507	-0.63521	-0.682832	-0.576616	0	18.2774	0.603262	2.315	1.34	3.15	1.335	4.755	-37.629
-5	-1	-1	-1	1	Wt(-5,-1,-1,-1,1)	-0.782586	-0.596464	-0.444236	-0.238434	3.29302e-17	5.19207	0.641829	1.6	1.855	3.265	1.92	4.705	-11.2615
-5	-1	-1	-1	3	Wt(-5,-1,-1,-1,3)	-0.782586	-0.596464	-0.444236	-0.238434	6.58604e-17	5.19207	0.554632	1.6	1.855	3.265	1.92	4.705	-11.2615
-5	-1	-1	-1	5	Wt(-5,-1,-1,-1,5)	-0.782586	-0.596464	-0.444236	-0.238434	-3.29302e-17	5.19207	0.470167	1.6	1.855	3.265	1.92	4.705	-11.2615
-5	-1	-1	-1	7	Wt(-5,-1,-1,-1,7)	-0.782586	-0.596464	-0.444236	-0.238434	6.58604e-17	5.19207	0.400119	1.6	1.855	3.265	1.92	4.705	-11.2615
-5	-1	-1	-1	9	Wt(-5,-1,-1,-1,9)	-0.782586	-0.596464	-0.444236	-0.238434	0	5.19207	0.344653	1.6	1.855	3.265	1.92	4.705	-11.2615
-5	-1	-1	-3	1	Wt(-5,-1,-1,-3,1)	-0.69278	-0.5674	-0.49022	-0.461676	0	5.90655	0.656684	1.79	1.91	3.225	1.345	4.685	-12.5709
-5	-1	-1	-3	3	Wt(-5,-1,-1,-3,3)	-0.69278	-0.5674	-0.49022	-0.461676	-2.89468e-17	5.90655	0.58314	1.79	1.91	3.225	1.345	4.685	-12.5709
-5	-1	-1	-3	5	Wt(-5,-1,-1,-3,5)	-0.69278	-0.5674	-0.49022	-0.461676	0	5.90655	0.505724	1.79	1.91	3.225	1.345	4.685	-12.5709
-5	-1	-1	-3	7	Wt(-5,-1,-1,-3,7)	-0.69278	-0.5674	-0.49022	-0.461676	-2.89468e-17	5.90655	0.43741	1.79	1.91	3.225	1.345	4.685	-12.5709
-5	-1	-1	-3	9	Wt(-5,-1,-1,-3,9)	-0.69278	-0.5674	-0.49022	-0.461676	-5.78936e-17	5.90655	0.380949	1.79	1.91	3.225	1.345	4.685	-12.5709
-5	-1	-1	-5	1	Wt(-5,-1,-1,-5,1)	-0.590031	-0.516323	-0.498946	-0.603666	0	6.98376	0.670502	1.775	2.065	3.28	1.27	4.78	-13.6566
-5	-1	-1	-5	3	Wt(-5,-1,-1,-5,3)	-0.590031	-0.516323	-0.498946	-0.603666	0	6.98376	0.613274	1.775	2.065	3.28	1.27	4.78	-13.6566
-5	-1	-1	-5	5	Wt(-5,-1,-1,-5,5)	-0.590031	-0.516323	-0.498946	-0.603666	0	6.98376	0.547023	1.775	2.065	3.28	1.27	4.78	-13.6566
-5	-1	-1	-5	7	Wt(-5,-1,-1,-5,7)	-0.590031	-0.516323	-0.498946	-0.603666	-4.89638e-17	6.98376	0.483741	1.775	2.065	3.28	1.27	4.78	-13.6566
-5	-1	-1	-5	9	Wt(-5,-1,-1,-5,9)	-0.590031	-0.516323	-0.498946	-0.603666	2.44819e-17	6.98376	0.428216	1.775	2.065	3.28	1.27	4.78	-13.6566
-5	-1	-1	-7	1	Wt(-5,-1,-1,-7,1)	-0.500923	-0.466039	-0.491772	-0.688706	-2.06409e-17	8.28337	0.680434	1.815	2.065	3.37	1.23	4.76	-14.7028
-5	-1	-1	-7	3	Wt(-5,-1,-1,-7,3)	-0.500923	-0.466039	-0.491772	-0.688706	0	8.28337	0.637392	1.815	2.065	3.37	1.23	4.76	-14.7028
-5	-1	-1	-7	5	Wt(-5,-1,-1,-7,5)	-0.500923	-0.466039	-0.491772	-0.688706	0	8.28337	0.583248	1.815	2.065	3.37	1.23	4.76	-14.7028
-5	-1	-1	-7	7	Wt(-5,-1,-1,-7,7)	-0.500923	-0.466039	-0.491772	-0.688706	0	8.28337	0.527449	1.815	2.065	3.37	1.23	4.76	-14.7028
-5	-1	-1	-7	9	Wt(-5,-1,-1,-7,9)	-0.500923	-0.466039	-0.491772	-0.688706	-4.12817e-17	8.28337	0.475327	1.815	2.065	3.37	1.23	4.76	-14.7028
-5	-1	-1	-9	1	Wt(-5,-1,-1,-9,1)	-0.429991	-0.423491	-0.479855	-0.740361	0	9.71655	0.687007	1.87	2.075	3.395	1.19	4.75	-15.6884
-5	-1	-1	-9	3	Wt(-5,-1,-1,-9,3)	-0.429991	-0.423491	-0.479855	-0.740361	0	9.71655	0.654758	1.87	2.075	3.395	1.19	4.75	-15.6884
-5	-1	-1	-9	5	Wt(-5,-1,-1,-9,5)	-0.429991	-0.423491	-0.479855	-0.740361	0	9.71655	0.611437	1.87	2.075	3.395	1.19	4.75	-15.6884
-5	-1	-1	-9	7	Wt(-5,-1,-1,-9,7)	-0.429991	-0.423491	-0.479855	-0.740361	-5.2789e-17	9.71655	0.563843	1.87	2.075	3.395	1.19	4.75	-15.6884
-5	-1	-1	-9	9	Wt(-5,-1,-1,-9,9)	-0.429991	-0.423491	-0.479855	-0.740361	0	9.71655	0.516779	1.87	2.075	3.395	1.19	4.75	-15.6884
-5	-1	-3	-1	1	Wt(-5,-1,-3,-1,1)	-0.713123	-0.593032	-0.599882	-0.292288	-5.47071e-17	6.25058	0.647433	1.705	1.66	3.1	1.77	4.805	-15.2736
-5	-1	-3	-1	3	Wt(-5,-1,-3,-1,3)	-0.713123	-0.593032	-0.599882	-0.292288	-5.47071e-17	6.25058	0.576314	1.705	1.66	3.1	1.77	4.805	-15.2736
-5	-1	-3	-1	5	Wt(-5,-1,-3,-1,5)	-0.713123	-0.593032	-0.599882	-0.292288	2.73536e-17	6.25058	0.503399	1.705	1.66	3.1	1.77	4.805	-15.2736
-5	-1	-3	-1	7	Wt(-5,-1,-3,-1,7)	-0.713123	-0.593032	-0.599882	-0.292288	2.73536e-17	6.25058	0.438876	1.705	1.66	3.1	1.77	4.805	-15.2736
-5	-1	-3	-1	9	Wt(-5,-1,-3,-1,9)	-0.713123	-0.593032	-0.599882	-0.292288	5.47071e-17	6.25058	0.384967	1.705	1.66	3.1	1.77	4.805	-15.2736
-5	-1	-3	-3	1	Wt(-5,-1,-3,-3,1)	-0.638563	-0.563857	-0.617566	-0.471993	0	7.02535	0.659825	1.775	1.96	3.185	1.345	4.755	-16.5922
-5	-1	-3	-3	3	Wt(-5,-1,-3,-3,3)	-0.638563	-0.563857	-0.617566	-0.471993	-2.4337e-17	7.02535	0.599587	1.775	1.96	3.185	1.345	4.755	-16.5922
-5	-1	-3	-3	5	Wt(-5,-1,-3,-3,5)	-0.638563	-0.563857	-0.617566	-0.471993	-4.86739e-17	7.02535	0.533617	1.775	1.96	3.185	1.345	4.755	-16.5922
-5	-1	-3	-3	7	Wt(-5,-1,-3,-3,7)	-0.638563	-0.563857	-0.617566	-0.471993	-4.86739e-17	7.02535	0.472046	1.775	1.96	3.185	1.345	4.755	-16.5922
-5	-1	-3	-3	9	Wt(-5,-1,-3,-3,9)	-0.638563	-0.563857	-0.617566	-0.471993	2.4337e-17	7.02535	0.418515	1.775	1.96	3.185	1.345	4.755	-16.5922
-5	-1	-3	-5	1	Wt(-5,-1,-3,-5,1)	-0.557441	-0.520519	-0.608408	-0.593251	0	8.0992	0.671107	1.8	2.03	3.175	1.305	4.755	-17.7055
-5	-1	-3	-5	3	Wt(-5,-1,-3,-5,3)	-0.557441	-0.520519	-0.608408	-0.593251	0	8.0992	0.622889	1.8	2.03	3.175	1.305	4.755	-17.7055
-5	-1	-3	-5	5	Wt(-5,-1,-3,-5,5)	-0.557441	-0.520519	-0.608408	-0.593251	-2.11102e-17	8.0992	0.56621	1.8	2.03	3.175	1.305	4.755	-17.7055
-5	-1	-3	-5	7	Wt(-5,-1,-3,-5,7)	-0.557441	-0.520519	-0.608408	-0.593251	2.11102e-17	8.0992	0.509923	1.8	2.03	3.175	1.305	4.755	-17.7055
-5	-1	-3	-5	9	Wt(-5,-1,-3,-5,9)	-0.557441	-0.520519	-0.608408	-0.593251	0	8.0992	0.458482	1.8	2.03	3.175	1.305	4.755	-17.7055
-5	-1	-3	-7	1	Wt(-5,-1,-3,-7,1)	-0.484908	-0.477092	-0.588763	-0.671707	-1.82474e-17	9.36987	0.679666	1.79	2.13	3.255	1.255	4.765	-18.7761
-5	-1	-3	-7	3	Wt(-5,-1,-3,-7,3)	-0.484908	-0.477092	-0.588763	-0.671707	0	9.36987	0.642051	1.79	2.13	3.255	1.255	4.765	-18.7761
-5	-1	-3	-7	5	Wt(-5,-1,-3,-7,5)	-0.484908	-0.477092	-0.588763	-0.671707	-3.64948e-17	9.36987	0.594968	1.79	2.13	3.255	1.255	4.765	-18.7761
-5	-1	-3	-7	7	Wt(-5,-1,-3,-7,7)	-0.484908	-0.477092	-0.588763	-0.671707	0	9.36987	0.545369	1.79	2.13	3.255	1.255	4.765	-18.7761
-5	-1	-3	-7	9	Wt(-5,-1,-3,-7,9)	-0.484908	-0.477092	-0.588763	-0.671707	1.82474e-17	9.36987	0.497677	1.79	2.13	3.255	1.255	4.765	-18.7761
-5	-1	-3	-9	1	Wt(-5,-1,-3,-9,1)	-0.424616	-0.438784	-0.567022	-0.722774	0	10.7679	0.685721	1.865	2.245	3.205	1.215	4.75	-19.7957
-5	-1	-3	-9	3	Wt(-5,-1,-3,-9,3)	-0.424616	-0.438784	-0.567022	-0.722774	1.58783e-17	10.7679	0.656524	1.865	2.245	3.205	1.215	4.75	-19.7957
-5	-1	-3	-9	5	Wt(-5,-1,-3,-9,5)	-0.424616	-0.438784	-0.567022	-0.722774	1.58783e-17	10.7679	0.618043	1.865	2.245	3.205	1.215	4.75	-19.7957
-5	-1	-3	-9	7	Wt(-5,-1,-3,-9,7)	-0.424616	-0.438784	-0.567022	-0.722774	0	10.7679	0.575397	1.865	2.245	3.205	1.215	4.75	-19.7957
-5	-1	-3	-9	9	Wt(-5,-1,-3,-9,9)	-0.424616	-0.438784	-0.567022	-0.722774	-1.58783e-17	10.7679	0.532444	1.865	2.245	3.205	1.215	4.75	-19.7957
-5	-1	-5	-1	1	Wt(-5,-1,-5,-1,1)	-0.642871	-0.571991	-0.688067	-0.320132	0	7.54682	0.654126	1.75	1.63	3.03	1.785	4.83	-19.1575
-5	-1	-5	-1	3	Wt(-5,-1,-5,-1,3)	-0.642871	-0.571991	-0.688067	-0.320132	-4.53107e-17	7.54682	0.597073	1.75	1.63	3.03	1.785	4.83	-19.1575
-5	-1	-5	-1	5	Wt(-5,-1,-5,-1,5)	-0.642871	-0.571991	-0.688067	-0.320132	0	7.54682	0.535604	1.75	1.63	3.03	1.785	4.83	-19.1575
-5	-1	-5	-1	7	Wt(-5,-1,-5,-1,7)	-0.642871	-0.571991	-0.688067	-0.320132	0	7.54682	0.477845	1.75	1.63	3.03	1.785	4.83	-19.1575
-5	-1	-5	-1	9	Wt(-5,-1,-5,-1,9)	-0.642871	-0.571991	-0.688067	-0.320132	0	7.54682	0.426947	1.75	1.63	3.03	1.785	4.83	-19.1575
-5	-1	-5	-3	1	Wt(-5,-1,-5,-3,1)	-0.585	-0.547947	-0.69305	-0.46808	-4.09894e-17	8.34244	0.663769	1.85	1.875	2.98	1.445	4.87	-20.507
-5	-1	-5	-3	3	Wt(-5,-1,-5,-3,3)	-0.585	-0.547947	-0.69305	-0.46808	-4.09894e-17	8.34244	0.614822	1.85	1.875	2.98	1.445	4.87	-20.507
-5	-1	-5	-3	5	Wt(-5,-1,-5,-3,5)	-0.585	-0.547947	-0.69305	-0.46808	-4.09894e-17	8.34244	0.559419	1.85	1.875	2.98	1.445	4.87	-20.507
-5	-1	-5	-3	7	Wt(-5,-1,-5,-3,7)	-0.585	-0.547947	-0.69305	-0.46808	-8.19788e-17	8.34244	0.505108	1.85	1.875	2.98	1.445	4.87	-20.507
-5	-1	-5	-3	9	Wt(-5,-1,-5,-3,9)	-0.585	-0.547947	-0.69305	-0.46808	0	8.34244	0.455593	1.85	1.875	2.98	1.445	4.87	-20.507
-5	-1	-5	-5	1	Wt(-5,-1,-5,-5,1)	-0.522728	-0.513856	-0.678376	-0.574356	0	9.39116	0.672618	1.905	1.955	3.03	1.32	4.81	-21.6557
-5	-1	-5	-5	3	Wt(-5,-1,-5,-5,3)	-0.522728	-0.513856	-0.678376	-0.574356	0	9.39116	0.632302	1.905	1.955	3.03	1.32	4.81	-21.6557
-5	-1	-5	-5	5	Wt(-5,-1,-5,-5,5)	-0.522728	-0.513856	-0.678376	-0.574356	0	9.39116	0.584256	1.905	1.955	3.03	1.32	4.81	-21.6557
-5	-1	-5	-5	7	Wt(-5,-1,-5,-5,7)	-0.522728	-0.513856	-0.678376	-0.574356	-3.64121e-17	9.39116	0.534887	1.905	1.955	3.03	1.32	4.81	-21.6557
-5	-1	-5	-5	9	Wt(-5,-1,-5,-5,9)	-0.522728	-0.513856	-0.678376	-0.574356	0	9.39116	0.488043	1.905	1.955	3.03	1.32	4.81	-21.6557
-5	-1	-5	-7	1	Wt(-5,-1,-5,-7,1)	-0.465022	-0.478441	-0.655451	-0.648206	-3.22041e-17	10.6182	0.679704	1.895	2.02	3.09	1.28	4.76	-22.7237
-5	-1	-5	-7	3	Wt(-5,-1,-5,-7,3)	-0.465022	-0.478441	-0.655451	-0.648206	-3.22041e-17	10.6182	0.647173	1.895	2.02	3.09	1.28	4.76	-22.7237
-5	-1	-5	-7	5	Wt(-5,-1,-5,-7,5)	-0.465022	-0.478441	-0.655451	-0.648206	-3.22041e-17	10.6182	0.606544	1.895	2.02	3.09	1.28	4.76	-22.7237
-5	-1	-5	-7	7	Wt(-5,-1,-5,-7,7)	-0.465022	-0.478441	-0.655451	-0.648206	-3.22041e-17	10.6182	0.562878	1.895	2.02	3.09	1.28	4.76	-22.7237
-5	-1	-5	-7	9	Wt(-5,-1,-5,-7,9)	-0.465022	-0.478441	-0.655451	-0.648206	0	10.6182	0.519746	1.895	2.02	3.09	1.28	4.76	-22.7237
-5	-1	-5	-9	1	Wt(-5,-1,-5,-9,1)	-0.414941	-0.445711	-0.630693	-0.699455	-5.71396e-17	11.969	0.685038	1.89	2.125	3.115	1.255	4.76	-23.7805
-5	-1	-5	-9	3	Wt(-5,-1,-5,-9,3)	-0.414941	-0.445711	-0.630693	-0.699455	-2.85698e-17	11.969	0.65895	1.89	2.125	3.115	1.255	4.76	-23.7805
-5	-1	-5	-9	5	Wt(-5,-1,-5,-9,5)	-0.414941	-0.445711	-0.630693	-0.699455	0	11.969	0.625039	1.89	2.125	3.115	1.255	4.76	-23.7805
-5	-1	-5	-9	7	Wt(-5,-1,-5,-9,7)	-0.414941	-0.445711	-0.630693	-0.699455	-8.57095e-17	11.969	0.587122	1.89	2.125	3.115	1.255	4.76	-23.7805
-5	-1	-5	-9	9	Wt(-5,-1,-5,-9,9)	-0.414941	-0.445711	-0.630693	-0.699455	-5.71396e-17	11.969	0.548254	1.89	2.125	3.115	1.255	4.76	-23.7805
-5	-1	-7	-1	1	Wt(-5,-1,-7,-1,1)	-0.584272	-0.548721	-0.739088	-0.334691	3.80861e-17	8.97839	0.659851	1.91	1.84	2.9	1.745	4.77	-22.9659
-5	-1	-7	-1	3	Wt(-5,-1,-7,-1,3)	-0.584272	-0.548721	-0.739088	-0.334691	-3.80861e-17	8.97839	0.613714	1.91	1.84	2.9	1.745	4.77	-22.9659
-5	-1	-7	-1	5	Wt(-5,-1,-7,-1,5)	-0.584272	-0.548721	-0.739088	-0.334691	-3.80861e-17	8.97839	0.562216	1.91	1.84	2.9	1.745	4.77	-22.9659
-5	-1	-7	-1	7	Wt(-5,-1,-7,-1,7)	-0.584272	-0.548721	-0.739088	-0.334691	3.80861e-17	8.97839	0.511462	1.91	1.84	2.9	1.745	4.77	-22.9659
-5	-1	-7	-1	9	Wt(-5,-1,-7,-1,9)	-0.584272	-0.548721	-0.739088	-0.334691	-3.80861e-17	8.97839	0.464633	1.91	1.84	2.9	1.745	4.77	-22.9659
-5	-1	-7	-3	1	Wt(-5,-1,-7,-3,1)	-0.539427	-0.529876	-0.738886	-0.459596	-3.49715e-17	9.778	0.667333	1.885	1.98	2.945	1.445	4.85	-24.3158
-5	-1	-7	-3	3	Wt(-5,-1,-7,-3,3)	-0.539427	-0.529876	-0.738886	-0.459596	3.49715e-17	9.778	0.627164	1.885	1.98	2.945	1.445	4.85	-24.3158
-5	-1	-7	-3	5	Wt(-5,-1,-7,-3,5)	-0.539427	-0.529876	-0.738886	-0.459596	-3.49715e-17	9.778	0.58065	1.885	1.98	2.945	1.445	4.85	-24.3158
-5	-1	-7	-3	7	Wt(-5,-1,-7,-3,7)	-0.539427	-0.529876	-0.738886	-0.459596	0	9.778	0.533273	1.885	1.98	2.945	1.445	4.85	-24.3158
-5	-1	-7	-3	9	Wt(-5,-1,-7,-3,9)	-0.539427	-0.529876	-0.738886	-0.459596	3.49715e-17	9.778	0.488322	1.885	1.98	2.945	1.445	4.85	-24.3158
-5	-1	-7	-5	1	Wt(-5,-1,-7,-5,1)	-0.491201	-0.503465	-0.723743	-0.554153	3.16726e-17	10.7964	0.674295	1.925	2.01	2.97	1.345	4.85	-25.4941
-5	-1	-7	-5	3	Wt(-5,-1,-7,-5,3)	-0.491201	-0.503465	-0.723743	-0.554153	-3.16726e-17	10.7964	0.640371	1.925	2.01	2.97	1.345	4.85	-25.4941
-5	-1	-7	-5	5	Wt(-5,-1,-7,-5,5)	-0.491201	-0.503465	-0.723743	-0.554153	-6.33453e-17	10.7964	0.599571	1.925	2.01	2.97	1.345	4.85	-25.4941
-5	-1	-7	-5	7	Wt(-5,-1,-7,-5,7)	-0.491201	-0.503465	-0.723743	-0.554153	-3.16726e-17	10.7964	0.556507	1.925	2.01	2.97	1.345	4.85	-25.4941
-5	-1	-7	-5	9	Wt(-5,-1,-7,-5,9)	-0.491201	-0.503465	-0.723743	-0.554153	-3.16726e-17	10.7964	0.514338	1.925	2.01	2.97	1.345	4.85	-25.4941
-5	-1	-7	-7	1	Wt(-5,-1,-7,-7,1)	-0.445142	-0.475048	-0.701524	-0.623796	0	11.978	0.680123	1.905	1.9	3.03	1.305	4.87	-26.6099
-5	-1	-7	-7	3	Wt(-5,-1,-7,-7,3)	-0.445142	-0.475048	-0.701524	-0.623796	-2.85483e-17	11.978	0.651956	1.905	1.9	3.03	1.305	4.87	-26.6099
-5	-1	-7	-7	5	Wt(-5,-1,-7,-7,5)	-0.445142	-0.475048	-0.701524	-0.623796	-2.85483e-17	11.978	0.61686	1.905	1.9	3.03	1.305	4.87	-26.6099
-5	-1	-7	-7	7	Wt(-5,-1,-7,-7,7)	-0.445142	-0.475048	-0.701524	-0.623796	-2.85483e-17	11.978	0.578526	1.905	1.9	3.03	1.305	4.87	-26.6099
-5	-1	-7	-7	9	Wt(-5,-1,-7,-7,9)	-0.445142	-0.475048	-0.701524	-0.623796	-2.85483e-17	11.978	0.539783	1.905	1.9	3.03	1.305	4.87	-26.6099
-5	-1	-7	-9	1	Wt(-5,-1,-7,-9,1)	-0.403684	-0.447663	-0.677137	-0.674797	-2.57509e-17	13.2792	0.684742	1.895	2.02	3.09	1.28	4.76	-27.6953
-5	-1	-7	-9	3	Wt(-5,-1,-7,-9,3)	-0.403684	-0.447663	-0.677137	-0.674797	2.57509e-17	13.2792	0.661511	1.895	2.02	3.09	1.28	4.76	-27.6953
-5	-1	-7	-9	5	Wt(-5,-1,-7,-9,5)	-0.403684	-0.447663	-0.677137	-0.674797	2.57509e-17	13.2792	0.63165	1.895	2.02	3.09	1.28	4.76	-27.6953
-5	-1	-7	-9	7	Wt(-5,-1,-7,-9,7)	-0.403684	-0.447663	-0.677137	-0.674797	-5.15018e-17	13.2792	0.598011	1.895	2.02	3.09	1.28	4.76	-27.6953
-5	-1	-7	-9	9	Wt(-5,-1,-7,-9,9)	-0.403684	-0.447663	-0.677137	-0.674797	-2.57509e-17	13.2792	0.562995	1.895	2.02	3.09	1.28	4.76	-27.6953
-5	-1	-9	-1	1	Wt(-5,-1,-9,-1,1)	-0.537655	-0.52779	-0.770152	-0.34261	-6.51954e-17	10.49	0.664367	1.91	1.9	2.89	1.82	4.75	-26.6777
-5	-1	-9	-1	3	Wt(-5,-1,-9,-1,3)	-0.537655	-0.52779	-0.770152	-0.34261	-3.25977e-17	10.49	0.626428	1.91	1.9	2.89	1.82	4.75	-26.6777
-5	-1	-9	-1	5	Wt(-5,-1,-9,-1,5)	-0.537655	-0.52779	-0.770152	-0.34261	-3.25977e-17	10.49	0.58309	1.91	1.9	2.89	1.82	4.75	-26.6777
-5	-1	-9	-1	7	Wt(-5,-1,-9,-1,7)	-0.537655	-0.52779	-0.770152	-0.34261	0	10.49	0.538829	1.91	1.9	2.89	1.82	4.75	-26.6777
-5	-1	-9	-1	9	Wt(-5,-1,-9,-1,9)	-0.537655	-0.52779	-0.770152	-0.34261	-3.25977e-17	10.49	0.496446	1.91	1.9	2.89	1.82	4.75	-26.6777
-5	-1	-9	-3	1	Wt(-5,-1,-9,-3,1)	-0.502237	-0.513075	-0.767962	-0.450338	-6.05924e-17	11.2869	0.670282	1.915	2.085	2.925	1.42	4.845	-28.0885
-5	-1	-9	-3	3	Wt(-5,-1,-9,-3,3)	-0.502237	-0.513075	-0.767962	-0.450338	-3.02962e-17	11.2869	0.636789	1.915	2.085	2.925	1.42	4.845	-28.0885
-5	-1	-9	-3	5	Wt(-5,-1,-9,-3,5)	-0.502237	-0.513075	-0.767962	-0.450338	-3.02962e-17	11.2869	0.597451	1.915	2.085	2.925	1.42	4.845	-28.0885
-5	-1	-9	-3	7	Wt(-5,-1,-9,-3,7)	-0.502237	-0.513075	-0.767962	-0.450338	-3.02962e-17	11.2869	0.556233	1.915	2.085	2.925	1.42	4.845	-28.0885
-5	-1	-9	-3	9	Wt(-5,-1,-9,-3,9)	-0.502237	-0.513075	-0.767962	-0.450338	-3.02962e-17	11.2869	0.515858	1.915	2.085	2.925	1.42	4.845	-28.0885
-5	-1	-9	-5	1	Wt(-5,-1,-9,-5,1)	-0.464103	-0.492461	-0.754058	-0.535336	0	12.2762	0.675858	1.915	2.085	2.925	1.42	4.845	-29.2887
-5	-1	-9	-5	3	Wt(-5,-1,-9,-5,3)	-0.464103	-0.492461	-0.754058	-0.535336	5.57098e-17	12.2762	0.646979	1.915	2.085	2.925	1.42	4.845	-29.2887
-5	-1	-9	-5	5	Wt(-5,-1,-9,-5,5)	-0.464103	-0.492461	-0.754058	-0.535336	-2.78549e-17	12.2762	0.612076	1.915	2.085	2.925	1.42	4.845	-29.2887
-5	-1	-9	-5	7	Wt(-5,-1,-9,-5,7)	-0.464103	-0.492461	-0.754058	-0.535336	0	12.2762	0.574493	1.915	2.085	2.925	1.42	4.845	-29.2887
-5	-1	-9	-5	9	Wt(-5,-1,-9,-5,9)	-0.464103	-0.492461	-0.754058	-0.535336	-2.78549e-17	12.2762	0.53675	1.915	2.085	2.925	1.42	4.845	-29.2887
-5	-1	-9	-7	1	Wt(-5,-1,-9,-7,1)	-0.426835	-0.469616	-0.733935	-0.600869	-2.54897e-17	13.4153	0.680689	1.925	2.01	2.97	1.345	4.85	-30.4242
-5	-1	-9	-7	3	Wt(-5,-1,-9,-7,3)	-0.426835	-0.469616	-0.733935	-0.600869	0	13.4153	0.656139	1.925	2.01	2.97	1.345	4.85	-30.4242
-5	-1	-9	-7	5	Wt(-5,-1,-9,-7,5)	-0.426835	-0.469616	-0.733935	-0.600869	-5.09794e-17	13.4153	0.625653	1.925	2.01	2.97	1.345	4.85	-30.4242
-5	-1	-9	-7	7	Wt(-5,-1,-9,-7,7)	-0.426835	-0.469616	-0.733935	-0.600869	-2.54897e-17	13.4153	0.591945	1.925	2.01	2.97	1.345	4.85	-30.4242
-5	-1	-9	-7	9	Wt(-5,-1,-9,-7,9)	-0.426835	-0.469616	-0.733935	-0.600869	2.54897e-17	13.4153	0.557237	1.925	2.01	2.97	1.345	4.85	-30.4242
-5	-1	-9	-9	1	Wt(-5,-1,-9,-9,1)	-0.3923	-0.446817	-0.711342	-0.651	0	14.6694	0.684679	1.925	2.01	2.97	1.345	4.85	-31.5503
-5	-1	-9	-9	3	Wt(-5,-1,-9,-9,3)	-0.3923	-0.446817	-0.711342	-0.651	-2.33105e-17	14.6694	0.663951	1.925	2.01	2.97	1.345	4.85	-31.5503
-5	-1	-9	-9	5	Wt(-5,-1,-9,-9,5)	-0.3923	-0.446817	-0.711342	-0.651	-2.33105e-17	14.6694	0.637571	1.925	2.01	2.97	1.345	4.85	-31.5503
-5	-1	-9	-9	7	Wt(-5,-1,-9,-9,7)	-0.3923	-0.446817	-0.711342	-0.651	-2.33105e-17	14.6694	0.607684	1.925	2.01	2.97	1.345	4.85	-31.5503
-5	-1	-9	-9	9	Wt(-5,-1,-9,-9,9)	-0.3923	-0.446817	-0.711342	-0.651	-4.66211e-17	14.6694	0.576178	1.925	2.01	2.97	1.345	4.85	-31.5503
-5	-3	-1	-1	1	Wt(-5,-3,-1,-1,1)	-0.744161	-0.700585	-0.448627	-0.229582	5.26017e-17	6.50077	0.652429	1.78	1.255	3.285	1.985	4.83	-13.5737
-5	-3	-1	-1	3	Wt(-5,-3,-1,-1,3)	-0.744161	-0.700585	-0.448627	-0.229582	2.63008e-17	6.50077	0.585037	1.78	1.255	3.285	1.985	4.83	-13.5737
-5	-3	-1	-1	5	Wt(-5,-3,-1,-1,5)	-0.744161	-0.700585	-0.448627	-0.229582	0	6.50077	0.514282	1.78	1.255	3.285	1.985	4.83	-13.5737
-5	-3	-1	-1	7	Wt(-5,-3,-1,-1,7)	-0.744161	-0.700585	-0.448627	-0.229582	2.63008e-17	6.50077	0.450516	1.78	1.255	3.285	1.985	4.83	-13.5737
-5	-3	-1	-1	9	Wt(-5,-3,-1,-1,9)	-0.744161	-0.700585	-0.448627	-0.229582	2.63008e-17	6.50077	0.39653	1.78	1.255	3.285	1.985	4.83	-13.5737
-5	-3	-1	-3	1	Wt(-5,-3,-1,-3,1)	-0.680037	-0.672005	-0.489861	-0.416633	2.38928e-17	7.15596	0.662341	1.845	1.53	3.185	1.42	4.775	-14.964
-5	-3	-1	-3	3	Wt(-5,-3,-1,-3,3)	-0.680037	-0.672005	-0.489861	-0.416633	0	7.15596	0.603892	1.845	1.53	3.185	1.42	4.775	-14.964
-5	-3	-1	-3	5	Wt(-5,-3,-1,-3,5)	-0.680037	-0.672005	-0.489861	-0.416633	2.38928e-17	7.15596	0.539054	1.845	1.53	3.185	1.42	4.775	-14.964
-5	-3	-1	-3	7	Wt(-5,-3,-1,-3,7)	-0.680037	-0.672005	-0.489861	-0.416633	-2.38928e-17	7.15596	0.477959	1.845	1.53	3.185	1.42	4.775	-14.964
-5	-3	-1	-3	9	Wt(-5,-3,-1,-3,9)	-0.680037	-0.672005	-0.489861	-0.416633	0	7.15596	0.424471	1.845	1.53	3.185	1.42	4.775	-14.964
-5	-3	-1	-5	1	Wt(-5,-3,-1,-5,1)	-0.602027	-0.622729	-0.503566	-0.549799	0	8.13088	0.67223	1.89	1.57	3.265	1.345	4.74	-16.1604
-5	-3	-1	-5	3	Wt(-5,-3,-1,-5,3)	-0.602027	-0.622729	-0.503566	-0.549799	0	8.13088	0.624554	1.89	1.57	3.265	1.345	4.74	-16.1604
-5	-3	-1	-5	5	Wt(-5,-3,-1,-5,5)	-0.602027	-0.622729	-0.503566	-0.549799	-2.10279e-17	8.13088	0.568168	1.89	1.57	3.265	1.345	4.74	-16.1604
-5	-3	-1	-5	7	Wt(-5,-3,-1,-5,7)	-0.602027	-0.622729	-0.503566	-0.549799	0	8.13088	0.511968	1.89	1.57	3.265	1.345	4.74	-16.1604
-5	-3	-1	-5	9	Wt(-5,-3,-1,-5,9)	-0.602027	-0.622729	-0.503566	-0.549799	-4.20559e-17	8.13088	0.460484	1.89	1.57	3.265	1.345	4.74	-16.1604
-5	-3	-1	-7	1	Wt(-5,-3,-1,-7,1)	-0.527966	-0.570228	-0.502202	-0.639012	-1.83336e-17	9.3258	0.680164	1.94	1.575	3.345	1.28	4.74	-17.2369
-5	-3	-1	-7	3	Wt(-5,-3,-1,-7,3)	-0.527966	-0.570228	-0.502202	-0.639012	-3.66672e-17	9.3258	0.642499	1.94	1.575	3.345	1.28	4.74	-17.2369
-5	-3	-1	-7	5	Wt(-5,-3,-1,-7,5)	-0.527966	-0.570228	-0.502202	-0.639012	0	9.3258	0.595209	1.94	1.575	3.345	1.28	4.74	-17.2369
-5	-3	-1	-7	7	Wt(-5,-3,-1,-7,7)	-0.527966	-0.570228	-0.502202	-0.639012	1.83336e-17	9.3258	0.54536	1.94	1.575	3.345	1.28	4.74	-17.2369
-5	-3	-1	-7	9	Wt(-5,-3,-1,-7,9)	-0.527966	-0.570228	-0.502202	-0.639012	1.83336e-17	9.3258	0.497441	1.94	1.575	3.345	1.28	4.74	-17.2369
-5	-3	-1	-9	1	Wt(-5,-3,-1,-9,1)	-0.464272	-0.522388	-0.494275	-0.698249	-1.60284e-17	10.667	0.685965	1.965	1.645	3.335	1.24	4.74	-18.2869
-5	-3	-1	-9	3	Wt(-5,-3,-1,-9,3)	-0.464272	-0.522388	-0.494275	-0.698249	-1.60284e-17	10.667	0.656509	1.965	1.645	3.335	1.24	4.74	-18.2869
-5	-3	-1	-9	5	Wt(-5,-3,-1,-9,5)	-0.464272	-0.522388	-0.494275	-0.698249	-1.60284e-17	10.667	0.617605	1.965	1.645	3.335	1.24	4.74	-18.2869
-5	-3	-1	-9	7	Wt(-5,-3,-1,-9,7)	-0.464272	-0.522388	-0.494275	-0.698249	-4.80853e-17	10.667	0.574513	1.965	1.645	3.335	1.24	4.74	-18.2869
-5	-3	-1	-9	9	Wt(-5,-3,-1,-9,9)	-0.464272	-0.522388	-0.494275	-0.698249	3.20568e-17	10.667	0.531174	1.965	1.645	3.335	1.24	4.74	-18.2869
-5	-3	-3	-1	1	Wt(-5,-3,-3,-1,1)	-0.694117	-0.685154	-0.578388	-0.276153	0	7.53737	0.65514	1.82	1.335	3.06	1.81	4.855	-17.5118
-5	-3	-3	-1	3	Wt(-5,-3,-3,-1,3)	-0.694117	-0.685154	-0.578388	-0.276153	4.53675e-17	7.53737	0.598159	1.82	1.335	3.06	1.81	4.855	-17.5118
-5	-3	-3	-1	5	Wt(-5,-3,-3,-1,5)	-0.694117	-0.685154	-0.578388	-0.276153	0	7.53737	0.536573	1.82	1.335	3.06	1.81	4.855	-17.5118
-5	-3	-3	-1	7	Wt(-5,-3,-3,-1,7)	-0.694117	-0.685154	-0.578388	-0.276153	-4.53675e-17	7.53737	0.478636	1.82	1.335	3.06	1.81	4.855	-17.5118
-5	-3	-3	-1	9	Wt(-5,-3,-3,-1,9)	-0.694117	-0.685154	-0.578388	-0.276153	4.53675e-17	7.53737	0.427563	1.82	1.335	3.06	1.81	4.855	-17.5118
-5	-3	-3	-3	1	Wt(-5,-3,-3,-3,1)	-0.637389	-0.656563	-0.599588	-0.432609	0	8.25322	0.663971	1.84	1.455	3.145	1.48	4.84	-18.9445
-5	-3	-3	-3	3	Wt(-5,-3,-3,-3,3)	-0.637389	-0.656563	-0.599588	-0.432609	-4.14325e-17	8.25322	0.614432	1.84	1.455	3.145	1.48	4.84	-18.9445
-5	-3	-3	-3	5	Wt(-5,-3,-3,-3,5)	-0.637389	-0.656563	-0.599588	-0.432609	0	8.25322	0.558382	1.84	1.455	3.145	1.48	4.84	-18.9445
-5	-3	-3	-3	7	Wt(-5,-3,-3,-3,7)	-0.637389	-0.656563	-0.599588	-0.432609	-4.14325e-17	8.25322	0.503557	1.84	1.455	3.145	1.48	4.84	-18.9445
-5	-3	-3	-3	9	Wt(-5,-3,-3,-3,9)	-0.637389	-0.656563	-0.599588	-0.432609	-8.2865e-17	8.25322	0.4537	1.84	1.455	3.145	1.48	4.84	-18.9445
-5	-3	-3	-5	1	Wt(-5,-3,-3,-5,1)	-0.572433	-0.613997	-0.599309	-0.547558	-7.40165e-17	9.23987	0.672503	1.91	1.565	3.19	1.345	4.74	-20.1657
-5	-3	-3	-5	3	Wt(-5,-3,-3,-5,3)	-0.572433	-0.613997	-0.599309	-0.547558	-3.70083e-17	9.23987	0.631341	1.91	1.565	3.19	1.345	4.74	-20.1657
-5	-3	-3	-5	5	Wt(-5,-3,-3,-5,5)	-0.572433	-0.613997	-0.599309	-0.547558	-3.70083e-17	9.23987	0.582367	1.91	1.565	3.19	1.345	4.74	-20.1657
-5	-3	-3	-5	7	Wt(-5,-3,-3,-5,7)	-0.572433	-0.613997	-0.599309	-0.547558	-7.40165e-17	9.23987	0.532231	1.91	1.565	3.19	1.345	4.74	-20.1657
-5	-3	-3	-5	9	Wt(-5,-3,-3,-5,9)	-0.572433	-0.613997	-0.599309	-0.547558	-7.40165e-17	9.23987	0.484852	1.91	1.565	3.19	1.345	4.74	-20.1657
-5	-3	-3	-7	1	Wt(-5,-3,-3,-7,1)	-0.510322	-0.568845	-0.587922	-0.628395	-3.28147e-17	10.4207	0.679529	1.91	1.565	3.19	1.345	4.74	-21.2962
-5	-3	-3	-7	3	Wt(-5,-3,-3,-7,3)	-0.510322	-0.568845	-0.587922	-0.628395	0	10.4207	0.646159	1.91	1.565	3.19	1.345	4.74	-21.2962
-5	-3	-3	-7	5	Wt(-5,-3,-3,-7,5)	-0.510322	-0.568845	-0.587922	-0.628395	-3.28147e-17	10.4207	0.604545	1.91	1.565	3.19	1.345	4.74	-21.2962
-5	-3	-3	-7	7	Wt(-5,-3,-3,-7,7)	-0.510322	-0.568845	-0.587922	-0.628395	-3.28147e-17	10.4207	0.559992	1.91	1.565	3.19	1.345	4.74	-21.2962
-5	-3	-3	-7	9	Wt(-5,-3,-3,-7,9)	-0.510322	-0.568845	-0.587922	-0.628395	-3.28147e-17	10.4207	0.516178	1.91	1.565	3.19	1.345	4.74	-21.2962
-5	-3	-3	-9	1	Wt(-5,-3,-3,-9,1)	-0.455526	-0.526723	-0.57216	-0.684768	1.4567e-17	11.7372	0.684895	1.925	1.645	3.245	1.28	4.76	-22.3959
-5	-3	-3	-9	3	Wt(-5,-3,-3,-9,3)	-0.455526	-0.526723	-0.57216	-0.684768	-2.9134e-17	11.7372	0.658086	1.925	1.645	3.245	1.28	4.76	-22.3959
-5	-3	-3	-9	5	Wt(-5,-3,-3,-9,5)	-0.455526	-0.526723	-0.57216	-0.684768	1.4567e-17	11.7372	0.623264	1.925	1.645	3.245	1.28	4.76	-22.3959
-5	-3	-3	-9	7	Wt(-5,-3,-3,-9,7)	-0.455526	-0.526723	-0.57216	-0.684768	-2.9134e-17	11.7372	0.584457	1.925	1.645	3.245	1.28	4.76	-22.3959
-5	-3	-3	-9	9	Wt(-5,-3,-3,-9,9)	-0.455526	-0.526723	-0.57216	-0.684768	-1.4567e-17	11.7372	0.544842	1.925	1.645	3.245	1.28	4.76	-22.3959
-5	-3	-5	-1	1	Wt(-5,-3,-5,-1,1)	-0.640577	-0.657447	-0.660687	-0.30406	3.89346e-17	8.78272	0.659069	1.82	1.335	3.06	1.81	4.855	-21.4046
-5	-3	-5	-1	3	Wt(-5,-3,-5,-1,3)	-0.640577	-0.657447	-0.660687	-0.30406	0	8.78272	0.611579	1.82	1.335	3.06	1.81	4.855	-21.4046
-5	-3	-5	-1	5	Wt(-5,-3,-5,-1,5)	-0.640577	-0.657447	-0.660687	-0.30406	-3.89346e-17	8.78272	0.55883	1.82	1.335	3.06	1.81	4.855	-21.4046
-5	-3	-5	-1	7	Wt(-5,-3,-5,-1,7)	-0.640577	-0.657447	-0.660687	-0.30406	3.89346e-17	8.78272	0.507161	1.82	1.335	3.06	1.81	4.855	-21.4046
-5	-3	-5	-1	9	Wt(-5,-3,-5,-1,9)	-0.640577	-0.657447	-0.660687	-0.30406	0	8.78272	0.459767	1.82	1.335	3.06	1.81	4.855	-21.4046
-5	-3	-5	-3	1	Wt(-5,-3,-5,-3,1)	-0.59344	-0.632686	-0.670778	-0.436516	3.58865e-17	9.52869	0.666456	1.81	1.5	3.085	1.58	4.84	-22.9112
-5	-3	-5	-3	3	Wt(-5,-3,-5,-3,3)	-0.59344	-0.632686	-0.670778	-0.436516	-3.58865e-17	9.52869	0.624824	1.81	1.5	3.085	1.58	4.84	-22.9112
-5	-3	-5	-3	5	Wt(-5,-3,-5,-3,5)	-0.59344	-0.632686	-0.670778	-0.436516	-3.58865e-17	9.52869	0.576873	1.81	1.5	3.085	1.58	4.84	-22.9112
-5	-3	-5	-3	7	Wt(-5,-3,-5,-3,7)	-0.59344	-0.632686	-0.670778	-0.436516	-3.58865e-17	9.52869	0.52837	1.81	1.5	3.085	1.58	4.84	-22.9112
-5	-3	-5	-3	9	Wt(-5,-3,-5,-3,9)	-0.59344	-0.632686	-0.670778	-0.436516	-3.58865e-17	9.52869	0.482664	1.81	1.5	3.085	1.58	4.84	-22.9112
-5	-3	-5	-5	1	Wt(-5,-3,-5,-5,1)	-0.54088	-0.597959	-0.664337	-0.537546	3.2543e-17	10.5077	0.673537	1.865	1.635	3.15	1.37	4.745	-24.1285
-5	-3	-5	-5	3	Wt(-5,-3,-5,-5,3)	-0.54088	-0.597959	-0.664337	-0.537546	0	10.5077	0.63826	1.865	1.635	3.15	1.37	4.745	-24.1285
-5	-3	-5	-5	5	Wt(-5,-3,-5,-5,5)	-0.54088	-0.597959	-0.664337	-0.537546	0	10.5077	0.596028	1.865	1.635	3.15	1.37	4.745	-24.1285
-5	-3	-5	-5	7	Wt(-5,-3,-5,-5,7)	-0.54088	-0.597959	-0.664337	-0.537546	0	10.5077	0.551746	1.865	1.635	3.15	1.37	4.745	-24.1285
-5	-3	-5	-5	9	Wt(-5,-3,-5,-5,9)	-0.54088	-0.597959	-0.664337	-0.537546	0	10.5077	0.508681	1.865	1.635	3.15	1.37	4.745	-24.1285
-5	-3	-5	-7	1	Wt(-5,-3,-5,-7,1)	-0.489839	-0.560635	-0.649133	-0.612058	-2.93239e-17	11.6612	0.679548	1.875	1.655	3.115	1.355	4.805	-25.2733
-5	-3	-5	-7	3	Wt(-5,-3,-5,-7,3)	-0.489839	-0.560635	-0.649133	-0.612058	0	11.6612	0.650237	1.875	1.655	3.115	1.355	4.805	-25.2733
-5	-3	-5	-7	5	Wt(-5,-3,-5,-7,5)	-0.489839	-0.560635	-0.649133	-0.612058	0	11.6612	0.613842	1.875	1.655	3.115	1.355	4.805	-25.2733
-5	-3	-5	-7	7	Wt(-5,-3,-5,-7,7)	-0.489839	-0.560635	-0.649133	-0.612058	-2.93239e-17	11.6612	0.574313	1.875	1.655	3.115	1.355	4.805	-25.2733
-5	-3	-5	-7	9	Wt(-5,-3,-5,-7,9)	-0.489839	-0.560635	-0.649133	-0.612058	-2.93239e-17	11.6612	0.534609	1.875	1.655	3.115	1.355	4.805	-25.2733
-5	-3	-5	-9	1	Wt(-5,-3,-5,-9,1)	-0.443559	-0.524792	-0.630374	-0.666503	-2.64207e-17	12.9426	0.684337	1.935	1.65	3.13	1.315	4.785	-26.3876
-5	-3	-5	-9	3	Wt(-5,-3,-5,-9,3)	-0.443559	-0.524792	-0.630374	-0.666503	2.64207e-17	12.9426	0.660188	1.935	1.65	3.13	1.315	4.785	-26.3876
-5	-3	-5	-9	5	Wt(-5,-3,-5,-9,5)	-0.443559	-0.524792	-0.630374	-0.666503	-2.64207e-17	12.9426	0.629217	1.935	1.65	3.13	1.315	4.785	-26.3876
-5	-3	-5	-9	7	Wt(-5,-3,-5,-9,7)	-0.443559	-0.524792	-0.630374	-0.666503	-2.64207e-17	12.9426	0.594481	1.935	1.65	3.13	1.315	4.785	-26.3876
-5	-3	-5	-9	9	Wt(-5,-3,-5,-9,9)	-0.443559	-0.524792	-0.630374	-0.666503	0	12.9426	0.558516	1.935	1.65	3.13	1.315	4.785	-26.3876
-5	-3	-7	-1	1	Wt(-5,-3,-7,-1,1)	-0.592518	-0.628333	-0.713138	-0.320804	0	10.1604	0.662887	1.875	1.39	3.025	1.81	4.79	-25.2948
-5	-3	-7	-1	3	Wt(-5,-3,-7,-1,3)	-0.592518	-0.628333	-0.713138	-0.320804	0	10.1604	0.623194	1.875	1.39	3.025	1.81	4.79	-25.2948
-5	-3	-7	-1	5	Wt(-5,-3,-7,-1,5)	-0.592518	-0.628333	-0.713138	-0.320804	-3.36554e-17	10.1604	0.57818	1.875	1.39	3.025	1.81	4.79	-25.2948
-5	-3	-7	-1	7	Wt(-5,-3,-7,-1,7)	-0.592518	-0.628333	-0.713138	-0.320804	-3.36554e-17	10.1604	0.532597	1.875	1.39	3.025	1.81	4.79	-25.2948
-5	-3	-7	-1	9	Wt(-5,-3,-7,-1,9)	-0.592518	-0.628333	-0.713138	-0.320804	-3.36554e-17	10.1604	0.489308	1.875	1.39	3.025	1.81	4.79	-25.2948
-5	-3	-7	-3	1	Wt(-5,-3,-7,-3,1)	-0.553923	-0.607923	-0.717461	-0.434834	3.13139e-17	10.9201	0.668969	1.83	1.605	3.05	1.53	4.81	-26.7925
-5	-3	-7	-3	3	Wt(-5,-3,-7,-3,3)	-0.553923	-0.607923	-0.717461	-0.434834	3.13139e-17	10.9201	0.633815	1.83	1.605	3.05	1.53	4.81	-26.7925
-5	-3	-7	-3	5	Wt(-5,-3,-7,-3,5)	-0.553923	-0.607923	-0.717461	-0.434834	-3.13139e-17	10.9201	0.592798	1.83	1.605	3.05	1.53	4.81	-26.7925
-5	-3	-7	-3	7	Wt(-5,-3,-7,-3,7)	-0.553923	-0.607923	-0.717461	-0.434834	-3.13139e-17	10.9201	0.550172	1.83	1.605	3.05	1.53	4.81	-26.7925
-5	-3	-7	-3	9	Wt(-5,-3,-7,-3,9)	-0.553923	-0.607923	-0.717461	-0.434834	0	10.9201	0.508762	1.83	1.605	3.05	1.53	4.81	-26.7925
-5	-3	-7	-5	1	Wt(-5,-3,-7,-5,1)	-0.511426	-0.580049	-0.708854	-0.524872	2.8775e-17	11.8836	0.674807	1.93	1.685	3.065	1.355	4.78	-28.0455
-5	-3	-7	-5	3	Wt(-5,-3,-7,-5,3)	-0.511426	-0.580049	-0.708854	-0.524872	-2.8775e-17	11.8836	0.644477	1.93	1.685	3.065	1.355	4.78	-28.0455
-5	-3	-7	-5	5	Wt(-5,-3,-7,-5,5)	-0.511426	-0.580049	-0.708854	-0.524872	-2.8775e-17	11.8836	0.608017	1.93	1.685	3.065	1.355	4.78	-28.0455
-5	-3	-7	-5	7	Wt(-5,-3,-7,-5,7)	-0.511426	-0.580049	-0.708854	-0.524872	-2.8775e-17	11.8836	0.569043	1.93	1.685	3.065	1.355	4.78	-28.0455
-5	-3	-7	-5	9	Wt(-5,-3,-7,-5,9)	-0.511426	-0.580049	-0.708854	-0.524872	-5.75501e-17	11.8836	0.5302	1.93	1.685	3.065	1.355	4.78	-28.0455
-5	-3	-7	-7	1	Wt(-5,-3,-7,-7,1)	-0.469509	-0.549574	-0.692986	-0.594073	2.62925e-17	13.0057	0.679901	1.955	1.755	3.055	1.315	4.78	-29.1776
-5	-3	-7	-7	3	Wt(-5,-3,-7,-7,3)	-0.469509	-0.549574	-0.692986	-0.594073	-2.62925e-17	13.0057	0.65415	1.955	1.755	3.055	1.315	4.78	-29.1776
-5	-3	-7	-7	5	Wt(-5,-3,-7,-7,5)	-0.469509	-0.549574	-0.692986	-0.594073	0	13.0057	0.6223	1.955	1.755	3.055	1.315	4.78	-29.1776
-5	-3	-7	-7	7	Wt(-5,-3,-7,-7,7)	-0.469509	-0.549574	-0.692986	-0.594073	-2.62925e-17	13.0057	0.587295	1.955	1.755	3.055	1.315	4.78	-29.1776
-5	-3	-7	-7	9	Wt(-5,-3,-7,-7,9)	-0.469509	-0.549574	-0.692986	-0.594073	-2.62925e-17	13.0057	0.551493	1.955	1.755	3.055	1.315	4.78	-29.1776
-5	-3	-7	-9	1	Wt(-5,-3,-7,-9,1)	-0.430559	-0.519484	-0.673861	-0.646736	-2.39985e-17	14.2489	0.684111	1.955	1.755	3.055	1.315	4.78	-30.2771
-5	-3	-7	-9	3	Wt(-5,-3,-7,-9,3)	-0.430559	-0.519484	-0.673861	-0.646736	-2.39985e-17	14.2489	0.662421	1.955	1.755	3.055	1.315	4.78	-30.2771
-5	-3	-7	-9	5	Wt(-5,-3,-7,-9,5)	-0.430559	-0.519484	-0.673861	-0.646736	-2.39985e-17	14.2489	0.63489	1.955	1.755	3.055	1.315	4.78	-30.2771
-5	-3	-7	-9	7	Wt(-5,-3,-7,-9,7)	-0.430559	-0.519484	-0.673861	-0.646736	-2.39985e-17	14.2489	0.603848	1.955	1.755	3.055	1.315	4.78	-30.2771
-5	-3	-7	-9	9	Wt(-5,-3,-7,-9,9)	-0.430559	-0.519484	-0.673861	-0.646736	-2.39985e-17	14.2489	0.571306	1.955	1.755	3.055	1.315	4.78	-30.2771
-5	-3	-9	-1	1	Wt(-5,-3,-9,-1,1)	-0.551855	-0.601721	-0.747534	-0.3311	0	11.6233	0.666191	1.88	1.47	2.99	1.82	4.795	-29.1309
-5	-3	-9	-1	3	Wt(-5,-3,-9,-1,3)	-0.551855	-0.601721	-0.747534	-0.3311	0	11.6233	0.632673	1.88	1.47	2.99	1.82	4.795	-29.1309
-5	-3	-9	-1	5	Wt(-5,-3,-9,-1,5)	-0.551855	-0.601721	-0.747534	-0.3311	0	11.6233	0.594117	1.88	1.47	2.99	1.82	4.795	-29.1309
-5	-3	-9	-1	7	Wt(-5,-3,-9,-1,7)	-0.551855	-0.601721	-0.747534	-0.3311	-5.88387e-17	11.6233	0.554055	1.88	1.47	2.99	1.82	4.795	-29.1309
-5	-3	-9	-1	9	Wt(-5,-3,-9,-1,9)	-0.551855	-0.601721	-0.747534	-0.3311	-2.94194e-17	11.6233	0.514904	1.88	1.47	2.99	1.82	4.795	-29.1309
-5	-3	-9	-3	1	Wt(-5,-3,-9,-3,1)	-0.520088	-0.585101	-0.748911	-0.430839	0	12.3885	0.671222	1.865	1.65	2.965	1.63	4.835	-30.6331
-5	-3	-9	-3	3	Wt(-5,-3,-9,-3,3)	-0.520088	-0.585101	-0.748911	-0.430839	2.76024e-17	12.3885	0.641233	1.865	1.65	2.965	1.63	4.835	-30.6331
-5	-3	-9	-3	5	Wt(-5,-3,-9,-3,5)	-0.520088	-0.585101	-0.748911	-0.430839	-2.76024e-17	12.3885	0.605952	1.865	1.65	2.965	1.63	4.835	-30.6331
-5	-3	-9	-3	7	Wt(-5,-3,-9,-3,7)	-0.520088	-0.585101	-0.748911	-0.430839	-5.52048e-17	12.3885	0.568521	1.865	1.65	2.965	1.63	4.835	-30.6331
-5	-3	-9	-3	9	Wt(-5,-3,-9,-3,9)	-0.520088	-0.585101	-0.748911	-0.430839	2.76024e-17	12.3885	0.531246	1.865	1.65	2.965	1.63	4.835	-30.6331
-5	-3	-9	-5	1	Wt(-5,-3,-9,-5,1)	-0.485352	-0.562687	-0.739965	-0.511944	-2.56446e-17	13.3342	0.676071	1.9	1.73	3.005	1.455	4.78	-31.903
-5	-3	-9	-5	3	Wt(-5,-3,-9,-5,3)	-0.485352	-0.562687	-0.739965	-0.511944	-2.56446e-17	13.3342	0.649787	1.9	1.73	3.005	1.455	4.78	-31.903
-5	-3	-9	-5	5	Wt(-5,-3,-9,-5,5)	-0.485352	-0.562687	-0.739965	-0.511944	-2.56446e-17	13.3342	0.618136	1.9	1.73	3.005	1.455	4.78	-31.903
-5	-3	-9	-5	7	Wt(-5,-3,-9,-5,7)	-0.485352	-0.562687	-0.739965	-0.511944	0	13.3342	0.583799	1.9	1.73	3.005	1.455	4.78	-31.903
-5	-3	-9	-5	9	Wt(-5,-3,-9,-5,9)	-0.485352	-0.562687	-0.739965	-0.511944	-2.56446e-17	13.3342	0.548888	1.9	1.73	3.005	1.455	4.78	-31.903
-5	-3	-9	-7	1	Wt(-5,-3,-9,-7,1)	-0.450636	-0.537776	-0.724836	-0.576446	0	14.4252	0.6804	2.01	1.76	3.015	1.33	4.765	-33.0458
-5	-3	-9	-7	3	Wt(-5,-3,-9,-7,3)	-0.450636	-0.537776	-0.724836	-0.576446	-2.37052e-17	14.4252	0.65767	2.01	1.76	3.015	1.33	4.765	-33.0458
-5	-3	-9	-7	5	Wt(-5,-3,-9,-7,5)	-0.450636	-0.537776	-0.724836	-0.576446	-2.37052e-17	14.4252	0.629676	2.01	1.76	3.015	1.33	4.765	-33.0458
-5	-3	-9	-7	7	Wt(-5,-3,-9,-7,7)	-0.450636	-0.537776	-0.724836	-0.576446	0	14.4252	0.598629	2.01	1.76	3.015	1.33	4.765	-33.0458
-5	-3	-9	-7	9	Wt(-5,-3,-9,-7,9)	-0.450636	-0.537776	-0.724836	-0.576446	0	14.4252	0.566397	2.01	1.76	3.015	1.33	4.765	-33.0458
-5	-3	-9	-9	1	Wt(-5,-3,-9,-9,1)	-0.417711	-0.512575	-0.706606	-0.627238	-4.37533e-17	15.6309	0.684088	1.955	1.755	3.055	1.315	4.78	-34.1518
-5	-3	-9	-9	3	Wt(-5,-3,-9,-9,3)	-0.417711	-0.512575	-0.706606	-0.627238	-4.37533e-17	15.6309	0.664577	1.955	1.755	3.055	1.315	4.78	-34.1518
-5	-3	-9	-9	5	Wt(-5,-3,-9,-9,5)	-0.417711	-0.512575	-0.706606	-0.627238	0	15.6309	0.640041	1.955	1.755	3.055	1.315	4.78	-34.1518
-5	-3	-9	-9	7	Wt(-5,-3,-9,-9,7)	-0.417711	-0.512575	-0.706606	-0.627238	0	15.6309	0.612262	1.955	1.755	3.055	1.315	4.78	-34.1518
-5	-3	-9	-9	9	Wt(-5,-3,-9,-9,9)	-0.417711	-0.512575	-0.706606	-0.627238	-4.37533e-17	15.6309	0.582838	1.955	1.755	3.055	1.315	4.78	-34.1518
-5	-5	-1	-1	1	Wt(-5,-5,-1,-1,1)	-0.704854	-0.755069	-0.4429	-0.219414	0	7.96193	0.660578	1.785	1.24	3.26	2.085	4.815	-15.5921
-5	-5	-1	-1	3	Wt(-5,-5,-1,-1,3)	-0.704854	-0.755069	-0.4429	-0.219414	0	7.96193	0.608046	1.785	1.24	3.26	2.085	4.815	-15.5921
-5	-5	-1	-1	5	Wt(-5,-5,-1,-1,5)	-0.704854	-0.755069	-0.4429	-0.219414	0	7.96193	0.54973	1.785	1.24	3.26	2.085	4.815	-15.5921
-5	-5	-1	-1	7	Wt(-5,-5,-1,-1,7)	-0.704854	-0.755069	-0.4429	-0.219414	0	7.96193	0.493592	1.785	1.24	3.26	2.085	4.815	-15.5921
-5	-5	-1	-1	9	Wt(-5,-5,-1,-1,9)	-0.704854	-0.755069	-0.4429	-0.219414	0	7.96193	0.443188	1.785	1.24	3.26	2.085	4.815	-15.5921
-5	-5	-1	-3	1	Wt(-5,-5,-1,-3,1)	-0.65858	-0.731623	-0.480488	-0.377809	-7.98492e-17	8.56493	0.667373	1.83	1.335	3.12	1.645	4.88	-17.1471
-5	-5	-1	-3	3	Wt(-5,-5,-1,-3,3)	-0.65858	-0.731623	-0.480488	-0.377809	0	8.56493	0.620726	1.83	1.335	3.12	1.645	4.88	-17.1471
-5	-5	-1	-3	5	Wt(-5,-5,-1,-3,5)	-0.65858	-0.731623	-0.480488	-0.377809	0	8.56493	0.56698	1.83	1.335	3.12	1.645	4.88	-17.1471
-5	-5	-1	-3	7	Wt(-5,-5,-1,-3,7)	-0.65858	-0.731623	-0.480488	-0.377809	-3.99246e-17	8.56493	0.513575	1.83	1.335	3.12	1.645	4.88	-17.1471
-5	-5	-1	-3	9	Wt(-5,-5,-1,-3,9)	-0.65858	-0.731623	-0.480488	-0.377809	-3.99246e-17	8.56493	0.46438	1.83	1.335	3.12	1.645	4.88	-17.1471
-5	-5	-1	-5	1	Wt(-5,-5,-1,-5,1)	-0.600012	-0.69012	-0.497879	-0.500048	-3.619e-17	9.44878	0.67446	1.945	1.375	3.265	1.42	4.815	-18.398
-5	-5	-1	-5	3	Wt(-5,-5,-1,-5,3)	-0.600012	-0.69012	-0.497879	-0.500048	0	9.44878	0.634952	1.945	1.375	3.265	1.42	4.815	-18.398
-5	-5	-1	-5	5	Wt(-5,-5,-1,-5,5)	-0.600012	-0.69012	-0.497879	-0.500048	0	9.44878	0.587399	1.945	1.375	3.265	1.42	4.815	-18.398
-5	-5	-1	-5	7	Wt(-5,-5,-1,-5,7)	-0.600012	-0.69012	-0.497879	-0.500048	0	9.44878	0.538238	1.945	1.375	3.265	1.42	4.815	-18.398
-5	-5	-1	-5	9	Wt(-5,-5,-1,-5,9)	-0.600012	-0.69012	-0.497879	-0.500048	0	9.44878	0.4914	1.945	1.375	3.265	1.42	4.815	-18.398
-5	-5	-1	-7	1	Wt(-5,-5,-1,-7,1)	-0.540456	-0.642629	-0.502069	-0.589371	0	10.5431	0.680632	2	1.48	3.335	1.28	4.78	-19.5105
-5	-5	-1	-7	3	Wt(-5,-5,-1,-7,3)	-0.540456	-0.642629	-0.502069	-0.589371	-3.24337e-17	10.5431	0.648112	2	1.48	3.335	1.28	4.78	-19.5105
-5	-5	-1	-7	5	Wt(-5,-5,-1,-7,5)	-0.540456	-0.642629	-0.502069	-0.589371	-3.24337e-17	10.5431	0.607258	2	1.48	3.335	1.28	4.78	-19.5105
-5	-5	-1	-7	7	Wt(-5,-5,-1,-7,7)	-0.540456	-0.642629	-0.502069	-0.589371	-6.48674e-17	10.5431	0.563264	2	1.48	3.335	1.28	4.78	-19.5105
-5	-5	-1	-7	9	Wt(-5,-5,-1,-7,9)	-0.540456	-0.642629	-0.502069	-0.589371	-3.24337e-17	10.5431	0.519796	2	1.48	3.335	1.28	4.78	-19.5105
-5	-5	-1	-9	1	Wt(-5,-5,-1,-9,1)	-0.485757	-0.596281	-0.498954	-0.653362	-2.9005e-17	11.7894	0.685533	2.055	1.455	3.345	1.255	4.8	-20.563
-5	-5	-1	-9	3	Wt(-5,-5,-1,-9,3)	-0.485757	-0.596281	-0.498954	-0.653362	-2.9005e-17	11.7894	0.659116	2.055	1.455	3.345	1.255	4.8	-20.563
-5	-5	-1	-9	5	Wt(-5,-5,-1,-9,5)	-0.485757	-0.596281	-0.498954	-0.653362	0	11.7894	0.624629	2.055	1.455	3.345	1.255	4.8	-20.563
-5	-5	-1	-9	7	Wt(-5,-5,-1,-9,7)	-0.485757	-0.596281	-0.498954	-0.653362	-1.45025e-17	11.7894	0.586065	2.055	1.455	3.345	1.255	4.8	-20.563
-5	-5	-1	-9	9	Wt(-5,-5,-1,-9,9)	-0.485757	-0.596281	-0.498954	-0.653362	-2.9005e-17	11.7894	0.546598	2.055	1.455	3.345	1.255	4.8	-20.563
-5	-5	-3	-1	1	Wt(-5,-5,-3,-1,1)	-0.669907	-0.738561	-0.554272	-0.260545	0	8.9657	0.661547	1.855	1.275	3.095	1.81	4.84	-19.588
-5	-5	-3	-1	3	Wt(-5,-5,-3,-1,3)	-0.669907	-0.738561	-0.554272	-0.260545	-7.62799e-17	8.9657	0.615637	1.855	1.275	3.095	1.81	4.84	-19.588
-5	-5	-3	-1	5	Wt(-5,-5,-3,-1,5)	-0.669907	-0.738561	-0.554272	-0.260545	-7.62799e-17	8.9657	0.564085	1.855	1.275	3.095	1.81	4.84	-19.588
-5	-5	-3	-1	7	Wt(-5,-5,-3,-1,7)	-0.669907	-0.738561	-0.554272	-0.260545	-3.81399e-17	8.9657	0.513135	1.855	1.275	3.095	1.81	4.84	-19.588
-5	-5	-3	-1	9	Wt(-5,-5,-3,-1,9)	-0.669907	-0.738561	-0.554272	-0.260545	-3.81399e-17	8.9657	0.466064	1.855	1.275	3.095	1.81	4.84	-19.588
-5	-5	-3	-3	1	Wt(-5,-5,-3,-3,1)	-0.626781	-0.714162	-0.577299	-0.397254	-3.5515e-17	9.62838	0.667925	1.83	1.335	3.12	1.645	4.88	-21.1036
-5	-5	-3	-3	3	Wt(-5,-5,-3,-3,3)	-0.626781	-0.714162	-0.577299	-0.397254	0	9.62838	0.62713	1.83	1.335	3.12	1.645	4.88	-21.1036
-5	-5	-3	-3	5	Wt(-5,-5,-3,-3,5)	-0.626781	-0.714162	-0.577299	-0.397254	3.5515e-17	9.62838	0.579819	1.83	1.335	3.12	1.645	4.88	-21.1036
-5	-5	-3	-3	7	Wt(-5,-5,-3,-3,7)	-0.626781	-0.714162	-0.577299	-0.397254	0	9.62838	0.53171	1.83	1.335	3.12	1.645	4.88	-21.1036
-5	-5	-3	-3	9	Wt(-5,-5,-3,-3,9)	-0.626781	-0.714162	-0.577299	-0.397254	3.5515e-17	9.62838	0.486189	1.83	1.335	3.12	1.645	4.88	-21.1036
-5	-5	-3	-5	1	Wt(-5,-5,-3,-5,1)	-0.575573	-0.676869	-0.583535	-0.504407	3.24591e-17	10.5349	0.674349	1.905	1.435	3.175	1.42	4.815	-22.4024
-5	-5	-3	-5	3	Wt(-5,-5,-3,-5,3)	-0.575573	-0.676869	-0.583535	-0.504407	3.24591e-17	10.5349	0.639393	1.905	1.435	3.175	1.42	4.815	-22.4024
-5	-5	-3	-5	5	Wt(-5,-5,-3,-5,5)	-0.575573	-0.676869	-0.583535	-0.504407	-3.24591e-17	10.5349	0.597372	1.905	1.435	3.175	1.42	4.815	-22.4024
-5	-5	-3	-5	7	Wt(-5,-5,-3,-5,7)	-0.575573	-0.676869	-0.583535	-0.504407	3.24591e-17	10.5349	0.553195	1.905	1.435	3.175	1.42	4.815	-22.4024
-5	-5	-3	-5	9	Wt(-5,-5,-3,-5,9)	-0.575573	-0.676869	-0.583535	-0.504407	6.49181e-17	10.5349	0.510153	1.905	1.435	3.175	1.42	4.815	-22.4024
-5	-5	-3	-7	1	Wt(-5,-5,-3,-7,1)	-0.52392	-0.635109	-0.579318	-0.585023	0	11.6283	0.679989	1.97	1.47	3.18	1.345	4.78	-23.5573
-5	-5	-3	-7	3	Wt(-5,-5,-3,-7,3)	-0.52392	-0.635109	-0.579318	-0.585023	2.94069e-17	11.6283	0.650705	1.97	1.47	3.18	1.345	4.78	-23.5573
-5	-5	-3	-7	5	Wt(-5,-5,-3,-7,5)	-0.52392	-0.635109	-0.579318	-0.585023	0	11.6283	0.614247	1.97	1.47	3.18	1.345	4.78	-23.5573
-5	-5	-3	-7	7	Wt(-5,-5,-3,-7,7)	-0.52392	-0.635109	-0.579318	-0.585023	-2.94069e-17	11.6283	0.574604	1.97	1.47	3.18	1.345	4.78	-23.5573
-5	-5	-3	-7	9	Wt(-5,-5,-3,-7,9)	-0.52392	-0.635109	-0.579318	-0.585023	0	11.6283	0.534774	1.97	1.47	3.18	1.345	4.78	-23.5573
-5	-5	-3	-9	1	Wt(-5,-5,-3,-9,1)	-0.475933	-0.594021	-0.569588	-0.64472	0	12.861	0.684585	1.97	1.47	3.18	1.345	4.78	-24.6862
-5	-5	-3	-9	3	Wt(-5,-5,-3,-9,3)	-0.475933	-0.594021	-0.569588	-0.64472	0	12.861	0.660323	1.97	1.47	3.18	1.345	4.78	-24.6862
-5	-5	-3	-9	5	Wt(-5,-5,-3,-9,5)	-0.475933	-0.594021	-0.569588	-0.64472	-2.65882e-17	12.861	0.629142	1.97	1.47	3.18	1.345	4.78	-24.6862
-5	-5	-3	-9	7	Wt(-5,-5,-3,-9,7)	-0.475933	-0.594021	-0.569588	-0.64472	0	12.861	0.594161	1.97	1.47	3.18	1.345	4.78	-24.6862
-5	-5	-3	-9	9	Wt(-5,-5,-3,-9,9)	-0.475933	-0.594021	-0.569588	-0.64472	0	12.861	0.557957	1.97	1.47	3.18	1.345	4.78	-24.6862
-5	-5	-5	-1	1	Wt(-5,-5,-5,-1,1)	-0.630197	-0.712044	-0.631394	-0.288	3.36693e-17	10.1562	0.663637	1.82	1.335	3.06	1.81	4.855	-23.511
-5	-5	-5	-1	3	Wt(-5,-5,-5,-1,3)	-0.630197	-0.712044	-0.631394	-0.288	3.36693e-17	10.1562	0.624063	1.82	1.335	3.06	1.81	4.855	-23.511
-5	-5	-5	-1	5	Wt(-5,-5,-5,-1,5)	-0.630197	-0.712044	-0.631394	-0.288	0	10.1562	0.57906	1.82	1.335	3.06	1.81	4.855	-23.511
-5	-5	-5	-1	7	Wt(-5,-5,-5,-1,7)	-0.630197	-0.712044	-0.631394	-0.288	0	10.1562	0.533423	1.82	1.335	3.06	1.81	4.855	-23.511
-5	-5	-5	-1	9	Wt(-5,-5,-5,-1,9)	-0.630197	-0.712044	-0.631394	-0.288	-3.36693e-17	10.1562	0.490049	1.82	1.335	3.06	1.81	4.855	-23.511
-5	-5	-5	-3	1	Wt(-5,-5,-5,-3,1)	-0.592283	-0.689664	-0.645022	-0.406635	-6.30049e-17	10.8548	0.669293	1.87	1.29	3.095	1.735	4.825	-25.038
-5	-5	-5	-3	3	Wt(-5,-5,-5,-3,3)	-0.592283	-0.689664	-0.645022	-0.406635	0	10.8548	0.633951	1.87	1.29	3.095	1.735	4.825	-25.038
-5	-5	-5	-3	5	Wt(-5,-5,-5,-3,5)	-0.592283	-0.689664	-0.645022	-0.406635	0	10.8548	0.592668	1.87	1.29	3.095	1.735	4.825	-25.038
-5	-5	-5	-3	7	Wt(-5,-5,-5,-3,7)	-0.592283	-0.689664	-0.645022	-0.406635	3.15025e-17	10.8548	0.549772	1.87	1.29	3.095	1.735	4.825	-25.038
-5	-5	-5	-3	9	Wt(-5,-5,-5,-3,9)	-0.592283	-0.689664	-0.645022	-0.406635	0	10.8548	0.508132	1.87	1.29	3.095	1.735	4.825	-25.038
-5	-5	-5	-5	1	Wt(-5,-5,-5,-5,1)	-0.54881	-0.657833	-0.645079	-0.501651	-5.81211e-17	11.7669	0.674898	1.915	1.35	3.16	1.495	4.84	-26.3991
-5	-5	-5	-5	3	Wt(-5,-5,-5,-5,3)	-0.54881	-0.657833	-0.645079	-0.501651	-2.90605e-17	11.7669	0.644217	1.915	1.35	3.16	1.495	4.84	-26.3991
-5	-5	-5	-5	5	Wt(-5,-5,-5,-5,5)	-0.54881	-0.657833	-0.645079	-0.501651	2.90605e-17	11.7669	0.607323	1.915	1.35	3.16	1.495	4.84	-26.3991
-5	-5	-5	-5	7	Wt(-5,-5,-5,-5,7)	-0.54881	-0.657833	-0.645079	-0.501651	-5.81211e-17	11.7669	0.567927	1.915	1.35	3.16	1.495	4.84	-26.3991
-5	-5	-5	-5	9	Wt(-5,-5,-5,-5,9)	-0.54881	-0.657833	-0.645079	-0.501651	0	11.7669	0.52873	1.915	1.35	3.16	1.495	4.84	-26.3991
-5	-5	-5	-7	1	Wt(-5,-5,-5,-7,1)	-0.504897	-0.622328	-0.636685	-0.575367	-2.6617e-17	12.8471	0.67989	1.97	1.47	3.18	1.345	4.78	-27.5549
-5	-5	-5	-7	3	Wt(-5,-5,-5,-7,3)	-0.504897	-0.622328	-0.636685	-0.575367	0	12.8471	0.653734	1.97	1.47	3.18	1.345	4.78	-27.5549
-5	-5	-5	-7	5	Wt(-5,-5,-5,-7,5)	-0.504897	-0.622328	-0.636685	-0.575367	0	12.8471	0.62138	1.97	1.47	3.18	1.345	4.78	-27.5549
-5	-5	-5	-7	7	Wt(-5,-5,-5,-7,7)	-0.504897	-0.622328	-0.636685	-0.575367	-5.32339e-17	12.8471	0.585872	1.97	1.47	3.18	1.345	4.78	-27.5549
-5	-5	-5	-7	9	Wt(-5,-5,-5,-7,9)	-0.504897	-0.622328	-0.636685	-0.575367	0	12.8471	0.549628	1.97	1.47	3.18	1.345	4.78	-27.5549
-5	-5	-5	-9	1	Wt(-5,-5,-5,-9,1)	-0.463489	-0.586878	-0.623796	-0.631776	-2.43264e-17	14.0568	0.68407	2.05	1.475	3.18	1.305	4.755	-28.6825
-5	-5	-5	-9	3	Wt(-5,-5,-5,-9,3)	-0.463489	-0.586878	-0.623796	-0.631776	-2.43264e-17	14.0568	0.661986	2.05	1.475	3.18	1.305	4.755	-28.6825
-5	-5	-5	-9	5	Wt(-5,-5,-5,-9,5)	-0.463489	-0.586878	-0.623796	-0.631776	0	14.0568	0.63395	2.05	1.475	3.18	1.305	4.755	-28.6825
-5	-5	-5	-9	7	Wt(-5,-5,-5,-9,7)	-0.463489	-0.586878	-0.623796	-0.631776	-4.86528e-17	14.0568	0.60238	2.05	1.475	3.18	1.305	4.755	-28.6825
-5	-5	-5	-9	9	Wt(-5,-5,-5,-9,9)	-0.463489	-0.586878	-0.623796	-0.631776	-4.86528e-17	14.0568	0.569355	2.05	1.475	3.18	1.305	4.755	-28.6825
-5	-5	-7	-1	1	Wt(-5,-5,-7,-1,1)	-0.592101	-0.683338	-0.684566	-0.306219	0	11.4754	0.666012	1.82	1.335	3.06	1.81	4.855	-27.4038
-5	-5	-7	-1	3	Wt(-5,-5,-7,-1,3)	-0.592101	-0.683338	-0.684566	-0.306219	0	11.4754	0.63194	1.82	1.335	3.06	1.81	4.855	-27.4038
-5	-5	-7	-1	5	Wt(-5,-5,-7,-1,5)	-0.592101	-0.683338	-0.684566	-0.306219	0	11.4754	0.592788	1.82	1.335	3.06	1.81	4.855	-27.4038
-5	-5	-7	-1	7	Wt(-5,-5,-7,-1,7)	-0.592101	-0.683338	-0.684566	-0.306219	-2.97987e-17	11.4754	0.552197	1.82	1.335	3.06	1.81	4.855	-27.4038
-5	-5	-7	-1	9	Wt(-5,-5,-7,-1,9)	-0.592101	-0.683338	-0.684566	-0.306219	-2.97987e-17	11.4754	0.51263	1.82	1.335	3.06	1.81	4.855	-27.4038
-5	-5	-7	-3	1	Wt(-5,-5,-7,-3,1)	-0.559514	-0.663883	-0.692469	-0.410244	-5.60806e-17	12.195	0.670913	1.87	1.29	3.095	1.735	4.825	-28.9598
-5	-5	-7	-3	3	Wt(-5,-5,-7,-3,3)	-0.559514	-0.663883	-0.692469	-0.410244	-5.60806e-17	12.195	0.640276	1.87	1.29	3.095	1.735	4.825	-28.9598
-5	-5	-7	-3	5	Wt(-5,-5,-7,-3,5)	-0.559514	-0.663883	-0.692469	-0.410244	-2.80403e-17	12.195	0.604288	1.87	1.29	3.095	1.735	4.825	-28.9598
-5	-5	-7	-3	7	Wt(-5,-5,-7,-3,7)	-0.559514	-0.663883	-0.692469	-0.410244	0	12.195	0.566212	1.87	1.29	3.095	1.735	4.825	-28.9598
-5	-5	-7	-3	9	Wt(-5,-5,-7,-3,9)	-0.559514	-0.663883	-0.692469	-0.410244	0	12.195	0.528413	1.87	1.29	3.095	1.735	4.825	-28.9598
-5	-5	-7	-5	1	Wt(-5,-5,-7,-5,1)	-0.522903	-0.637265	-0.689397	-0.495422	-2.60957e-17	13.1037	0.675739	1.92	1.45	3.15	1.42	4.805	-30.3722
-5	-5	-7	-5	3	Wt(-5,-5,-7,-5,3)	-0.522903	-0.637265	-0.689397	-0.495422	-2.60957e-17	13.1037	0.648801	1.92	1.45	3.15	1.42	4.805	-30.3722
-5	-5	-7	-5	5	Wt(-5,-5,-7,-5,5)	-0.522903	-0.637265	-0.689397	-0.495422	-2.60957e-17	13.1037	0.616411	1.92	1.45	3.15	1.42	4.805	-30.3722
-5	-5	-7	-5	7	Wt(-5,-5,-7,-5,7)	-0.522903	-0.637265	-0.689397	-0.495422	-2.60957e-17	13.1037	0.581371	1.92	1.45	3.15	1.42	4.805	-30.3722
-5	-5	-7	-5	9	Wt(-5,-5,-7,-5,9)	-0.522903	-0.637265	-0.689397	-0.495422	2.60957e-17	13.1037	0.545865	1.92	1.45	3.15	1.42	4.805	-30.3722
-5	-5	-7	-7	1	Wt(-5,-5,-7,-7,1)	-0.485744	-0.607478	-0.679318	-0.56341	0	14.1652	0.680102	1.98	1.475	3.15	1.36	4.785	-31.5456
-5	-5	-7	-7	3	Wt(-5,-5,-7,-7,3)	-0.485744	-0.607478	-0.679318	-0.56341	0	14.1652	0.656768	1.98	1.475	3.15	1.36	4.785	-31.5456
-5	-5	-7	-7	5	Wt(-5,-5,-7,-7,5)	-0.485744	-0.607478	-0.679318	-0.56341	-2.41402e-17	14.1652	0.628062	1.98	1.475	3.15	1.36	4.785	-31.5456
-5	-5	-7	-7	7	Wt(-5,-5,-7,-7,7)	-0.485744	-0.607478	-0.679318	-0.56341	0	14.1652	0.596309	1.98	1.475	3.15	1.36	4.785	-31.5456
-5	-5	-7	-7	9	Wt(-5,-5,-7,-7,9)	-0.485744	-0.607478	-0.679318	-0.56341	-2.41402e-17	14.1652	0.56345	1.98	1.475	3.15	1.36	4.785	-31.5456
-5	-5	-7	-9	1	Wt(-5,-5,-7,-9,1)	-0.450187	-0.577252	-0.665353	-0.617012	0	15.3478	0.683846	2.04	1.47	3.165	1.32	4.765	-32.6685
-5	-5	-7	-9	3	Wt(-5,-5,-7,-9,3)	-0.450187	-0.577252	-0.665353	-0.617012	2.22802e-17	15.3478	0.663806	2.04	1.47	3.165	1.32	4.765	-32.6685
-5	-5	-7	-9	5	Wt(-5,-5,-7,-9,5)	-0.450187	-0.577252	-0.665353	-0.617012	-2.22802e-17	15.3478	0.638622	2.04	1.47	3.165	1.32	4.765	-32.6685
-5	-5	-7	-9	7	Wt(-5,-5,-7,-9,7)	-0.450187	-0.577252	-0.665353	-0.617012	0	15.3478	0.610173	2.04	1.47	3.165	1.32	4.765	-32.6685
-5	-5	-7	-9	9	Wt(-5,-5,-7,-9,9)	-0.450187	-0.577252	-0.665353	-0.617012	-4.45604e-17	15.3478	0.580126	2.04	1.47	3.165	1.32	4.765	-32.6685
-5	-5	-9	-1	1	Wt(-5,-5,-9,-1,1)	-0.557969	-0.655975	-0.721739	-0.31846	0	12.8838	0.668291	1.87	1.35	3.035	1.845	4.805	-31.2697
-5	-5	-9	-1	3	Wt(-5,-5,-9,-1,3)	-0.557969	-0.655975	-0.721739	-0.31846	0	12.8838	0.638803	1.87	1.35	3.035	1.845	4.805	-31.2697
-5	-5	-9	-1	5	Wt(-5,-5,-9,-1,5)	-0.557969	-0.655975	-0.721739	-0.31846	0	12.8838	0.604666	1.87	1.35	3.035	1.845	4.805	-31.2697
-5	-5	-9	-1	7	Wt(-5,-5,-9,-1,7)	-0.557969	-0.655975	-0.721739	-0.31846	2.65411e-17	12.8838	0.568641	1.87	1.35	3.035	1.845	4.805	-31.2697
-5	-5	-9	-1	9	Wt(-5,-5,-9,-1,9)	-0.557969	-0.655975	-0.721739	-0.31846	-2.65411e-17	12.8838	0.532763	1.87	1.35	3.035	1.845	4.805	-31.2697
-5	-5	-9	-3	1	Wt(-5,-5,-9,-3,1)	-0.530091	-0.639414	-0.726212	-0.410702	0	13.6155	0.672515	1.86	1.37	3.05	1.76	4.81	-32.8648
-5	-5	-9	-3	3	Wt(-5,-5,-9,-3,3)	-0.530091	-0.639414	-0.726212	-0.410702	2.51148e-17	13.6155	0.645807	1.86	1.37	3.05	1.76	4.81	-32.8648
-5	-5	-9	-3	5	Wt(-5,-5,-9,-3,5)	-0.530091	-0.639414	-0.726212	-0.410702	2.51148e-17	13.6155	0.614324	1.86	1.37	3.05	1.76	4.81	-32.8648
-5	-5	-9	-3	7	Wt(-5,-5,-9,-3,7)	-0.530091	-0.639414	-0.726212	-0.410702	0	13.6155	0.580534	1.86	1.37	3.05	1.76	4.81	-32.8648
-5	-5	-9	-3	9	Wt(-5,-5,-9,-3,9)	-0.530091	-0.639414	-0.726212	-0.410702	2.51148e-17	13.6155	0.546358	1.86	1.37	3.05	1.76	4.81	-32.8648
-5	-5	-9	-5	1	Wt(-5,-5,-9,-5,1)	-0.499168	-0.617261	-0.721715	-0.487782	-2.35561e-17	14.5165	0.676666	1.915	1.565	3.07	1.445	4.795	-34.3059
-5	-5	-9	-5	3	Wt(-5,-5,-9,-5,3)	-0.499168	-0.617261	-0.721715	-0.487782	-2.35561e-17	14.5165	0.652908	1.915	1.565	3.07	1.445	4.795	-34.3059
-5	-5	-9	-5	5	Wt(-5,-5,-9,-5,5)	-0.499168	-0.617261	-0.721715	-0.487782	-2.35561e-17	14.5165	0.624368	1.915	1.565	3.07	1.445	4.795	-34.3059
-5	-5	-9	-5	7	Wt(-5,-5,-9,-5,7)	-0.499168	-0.617261	-0.721715	-0.487782	2.35561e-17	14.5165	0.593176	1.915	1.565	3.07	1.445	4.795	-34.3059
-5	-5	-9	-5	9	Wt(-5,-5,-9,-5,9)	-0.499168	-0.617261	-0.721715	-0.487782	0	14.5165	0.561085	1.915	1.565	3.07	1.445	4.795	-34.3059
-5	-5	-9	-7	1	Wt(-5,-5,-9,-7,1)	-0.467617	-0.592323	-0.711292	-0.550855	-6.59403e-17	15.5573	0.680472	1.985	1.62	3.075	1.345	4.78	-35.4927
-5	-5	-9	-7	3	Wt(-5,-5,-9,-7,3)	-0.467617	-0.592323	-0.711292	-0.550855	-2.19801e-17	15.5573	0.6596	1.985	1.62	3.075	1.345	4.78	-35.4927
-5	-5	-9	-7	5	Wt(-5,-5,-9,-7,5)	-0.467617	-0.592323	-0.711292	-0.550855	-2.19801e-17	15.5573	0.634057	1.985	1.62	3.075	1.345	4.78	-35.4927
-5	-5	-9	-7	7	Wt(-5,-5,-9,-7,7)	-0.467617	-0.592323	-0.711292	-0.550855	-2.19801e-17	15.5573	0.605629	1.985	1.62	3.075	1.345	4.78	-35.4927
-5	-5	-9	-7	9	Wt(-5,-5,-9,-7,9)	-0.467617	-0.592323	-0.711292	-0.550855	0	15.5573	0.575868	1.985	1.62	3.075	1.345	4.78	-35.4927
-5	-5	-9	-9	1	Wt(-5,-5,-9,-9,1)	-0.437028	-0.56663	-0.697395	-0.601893	-2.04616e-17	16.7119	0.683808	2.065	1.625	3.075	1.305	4.755	-36.6113
-5	-5	-9	-9	3	Wt(-5,-5,-9,-9,3)	-0.437028	-0.56663	-0.697395	-0.601893	0	16.7119	0.665613	2.065	1.625	3.075	1.305	4.755	-36.6113
-5	-5	-9	-9	5	Wt(-5,-5,-9,-9,5)	-0.437028	-0.56663	-0.697395	-0.601893	-2.04616e-17	16.7119	0.64295	2.065	1.625	3.075	1.305	4.755	-36.6113
-5	-5	-9	-9	7	Wt(-5,-5,-9,-9,7)	-0.437028	-0.56663	-0.697395	-0.601893	-2.04616e-17	16.7119	0.617287	2.065	1.625	3.075	1.305	4.755	-36.6113
-5	-5	-9	-9	9	Wt(-5,-5,-9,-9,9)	-0.437028	-0.56663	-0.697395	-0.601893	0	16.7119	0.589963	2.065	1.625	3.075	1.305	4.755	-36.6113
-5	-7	-1	-1	1	Wt(-5,-7,-1,-1,1)	-0.671861	-0.785784	-0.435143	-0.210558	3.59741e-17	9.5055	0.666465	1.83	1.185	3.315	2.25	4.775	-17.5748
-5	-7	-1	-1	3	Wt(-5,-7,-1,-1,3)	-0.671861	-0.785784	-0.435143	-0.210558	-3.59741e-17	9.5055	0.624601	1.83	1.185	3.315	2.25	4.775	-17.5748
-5	-7	-1	-1	5	Wt(-5,-7,-1,-1,5)	-0.671861	-0.785784	-0.435143	-0.210558	0	9.5055	0.576454	1.83	1.185	3.315	2.25	4.775	-17.5748
-5	-7	-1	-1	7	Wt(-5,-7,-1,-1,7)	-0.671861	-0.785784	-0.435143	-0.210558	-3.59741e-17	9.5055	0.527813	1.83	1.185	3.315	2.25	4.775	-17.5748
-5	-7	-1	-1	9	Wt(-5,-7,-1,-1,9)	-0.671861	-0.785784	-0.435143	-0.210558	0	9.5055	0.482024	1.83	1.185	3.315	2.25	4.775	-17.5748
-5	-7	-1	-3	1	Wt(-5,-7,-1,-3,1)	-0.637257	-0.76726	-0.469396	-0.346728	0	10.0667	0.671353	1.925	1.245	3.135	1.685	4.835	-19.1902
-5	-7	-1	-3	3	Wt(-5,-7,-1,-3,3)	-0.637257	-0.76726	-0.469396	-0.346728	0	10.0667	0.633489	1.925	1.245	3.135	1.685	4.835	-19.1902
-5	-7	-1	-3	5	Wt(-5,-7,-1,-3,5)	-0.637257	-0.76726	-0.469396	-0.346728	0	10.0667	0.588783	1.925	1.245	3.135	1.685	4.835	-19.1902
-5	-7	-1	-3	7	Wt(-5,-7,-1,-3,7)	-0.637257	-0.76726	-0.469396	-0.346728	0	10.0667	0.542565	1.925	1.245	3.135	1.685	4.835	-19.1902
-5	-7	-1	-3	9	Wt(-5,-7,-1,-3,9)	-0.637257	-0.76726	-0.469396	-0.346728	-3.39686e-17	10.0667	0.498198	1.925	1.245	3.135	1.685	4.835	-19.1902
-5	-7	-1	-5	1	Wt(-5,-7,-1,-5,1)	-0.5925	-0.733596	-0.488643	-0.457848	-3.14422e-17	10.8756	0.676583	1.995	1.325	3.21	1.435	4.82	-20.504
-5	-7	-1	-5	3	Wt(-5,-7,-1,-5,3)	-0.5925	-0.733596	-0.488643	-0.457848	-6.28844e-17	10.8756	0.643579	1.995	1.325	3.21	1.435	4.82	-20.504
-5	-7	-1	-5	5	Wt(-5,-7,-1,-5,5)	-0.5925	-0.733596	-0.488643	-0.457848	0	10.8756	0.603395	1.995	1.325	3.21	1.435	4.82	-20.504
-5	-7	-1	-5	7	Wt(-5,-7,-1,-5,7)	-0.5925	-0.733596	-0.488643	-0.457848	-6.28844e-17	10.8756	0.560651	1.995	1.325	3.21	1.435	4.82	-20.504
-5	-7	-1	-5	9	Wt(-5,-7,-1,-5,9)	-0.5925	-0.733596	-0.488643	-0.457848	-6.28844e-17	10.8756	0.518572	1.995	1.325	3.21	1.435	4.82	-20.504
-5	-7	-1	-7	1	Wt(-5,-7,-1,-7,1)	-0.544746	-0.692899	-0.496841	-0.544395	0	11.8816	0.681404	2.145	1.345	3.38	1.27	4.805	-21.6561
-5	-7	-1	-7	3	Wt(-5,-7,-1,-7,3)	-0.544746	-0.692899	-0.496841	-0.544395	0	11.8816	0.653342	2.145	1.345	3.38	1.27	4.805	-21.6561
-5	-7	-1	-7	5	Wt(-5,-7,-1,-7,5)	-0.544746	-0.692899	-0.496841	-0.544395	-2.87799e-17	11.8816	0.618091	2.145	1.345	3.38	1.27	4.805	-21.6561
-5	-7	-1	-7	7	Wt(-5,-7,-1,-7,7)	-0.544746	-0.692899	-0.496841	-0.544395	0	11.8816	0.579454	2.145	1.345	3.38	1.27	4.805	-21.6561
-5	-7	-1	-7	9	Wt(-5,-7,-1,-7,9)	-0.544746	-0.692899	-0.496841	-0.544395	0	11.8816	0.540357	2.145	1.345	3.38	1.27	4.805	-21.6561
-5	-7	-1	-9	1	Wt(-5,-7,-1,-9,1)	-0.498581	-0.650897	-0.4979	-0.610249	-2.62246e-17	13.0393	0.685483	2.145	1.345	3.38	1.27	4.805	-22.7101
-5	-7	-1	-9	3	Wt(-5,-7,-1,-9,3)	-0.498581	-0.650897	-0.4979	-0.610249	0	13.0393	0.661956	2.145	1.345	3.38	1.27	4.805	-22.7101
-5	-7	-1	-9	5	Wt(-5,-7,-1,-9,5)	-0.498581	-0.650897	-0.4979	-0.610249	0	13.0393	0.631522	2.145	1.345	3.38	1.27	4.805	-22.7101
-5	-7	-1	-9	7	Wt(-5,-7,-1,-9,7)	-0.498581	-0.650897	-0.4979	-0.610249	0	13.0393	0.597193	2.145	1.345	3.38	1.27	4.805	-22.7101
-5	-7	-1	-9	9	Wt(-5,-7,-1,-9,9)	-0.498581	-0.650897	-0.4979	-0.610249	0	13.0393	0.561497	2.145	1.345	3.38	1.27	4.805	-22.7101
-5	-7	-3	-1	1	Wt(-5,-7,-3,-1,1)	-0.647132	-0.771072	-0.53249	-0.247232	-3.26356e-17	10.4779	0.666506	1.86	1.25	3.13	1.895	4.815	-21.6149
-5	-7	-3	-1	3	Wt(-5,-7,-3,-1,3)	-0.647132	-0.771072	-0.53249	-0.247232	0	10.4779	0.628931	1.86	1.25	3.13	1.895	4.815	-21.6149
-5	-7	-3	-1	5	Wt(-5,-7,-3,-1,5)	-0.647132	-0.771072	-0.53249	-0.247232	-3.26356e-17	10.4779	0.585656	1.86	1.25	3.13	1.895	4.815	-21.6149
-5	-7	-3	-1	7	Wt(-5,-7,-3,-1,7)	-0.647132	-0.771072	-0.53249	-0.247232	-3.26356e-17	10.4779	0.541265	1.86	1.25	3.13	1.895	4.815	-21.6149
-5	-7	-3	-1	9	Wt(-5,-7,-3,-1,9)	-0.647132	-0.771072	-0.53249	-0.247232	-3.26356e-17	10.4779	0.498656	1.86	1.25	3.13	1.895	4.815	-21.6149
-5	-7	-3	-3	1	Wt(-5,-7,-3,-3,1)	-0.613658	-0.75104	-0.555899	-0.367641	0	11.0962	0.671264	1.925	1.245	3.135	1.685	4.835	-23.1532
-5	-7	-3	-3	3	Wt(-5,-7,-3,-3,3)	-0.613658	-0.75104	-0.555899	-0.367641	-3.0817e-17	11.0962	0.63729	1.925	1.245	3.135	1.685	4.835	-23.1532
-5	-7	-3	-3	5	Wt(-5,-7,-3,-3,5)	-0.613658	-0.75104	-0.555899	-0.367641	0	11.0962	0.597231	1.925	1.245	3.135	1.685	4.835	-23.1532
-5	-7	-3	-3	7	Wt(-5,-7,-3,-3,7)	-0.613658	-0.75104	-0.555899	-0.367641	-6.1634e-17	11.0962	0.555263	1.925	1.245	3.135	1.685	4.835	-23.1532
-5	-7	-3	-3	9	Wt(-5,-7,-3,-3,9)	-0.613658	-0.75104	-0.555899	-0.367641	0	11.0962	0.51423	1.925	1.245	3.135	1.685	4.835	-23.1532
-5	-7	-3	-5	1	Wt(-5,-7,-3,-5,1)	-0.57298	-0.719638	-0.566227	-0.466595	2.86535e-17	11.934	0.676185	1.96	1.325	3.175	1.51	4.78	-24.5285
-5	-7	-3	-5	3	Wt(-5,-7,-3,-5,3)	-0.57298	-0.719638	-0.566227	-0.466595	0	11.934	0.646359	1.96	1.325	3.175	1.51	4.78	-24.5285
-5	-7	-3	-5	5	Wt(-5,-7,-3,-5,5)	-0.57298	-0.719638	-0.566227	-0.466595	5.7307e-17	11.934	0.610254	1.96	1.325	3.175	1.51	4.78	-24.5285
-5	-7	-3	-5	7	Wt(-5,-7,-3,-5,7)	-0.57298	-0.719638	-0.566227	-0.466595	0	11.934	0.571482	1.96	1.325	3.175	1.51	4.78	-24.5285
-5	-7	-3	-5	9	Wt(-5,-7,-3,-5,9)	-0.57298	-0.719638	-0.566227	-0.466595	0	11.934	0.532718	1.96	1.325	3.175	1.51	4.78	-24.5285
-5	-7	-3	-7	1	Wt(-5,-7,-3,-7,1)	-0.530292	-0.682894	-0.567339	-0.545014	-2.64079e-17	12.9488	0.680714	2.06	1.36	3.215	1.36	4.785	-25.7365
-5	-7	-3	-7	3	Wt(-5,-7,-3,-7,3)	-0.530292	-0.682894	-0.567339	-0.545014	2.64079e-17	12.9488	0.655051	2.06	1.36	3.215	1.36	4.785	-25.7365
-5	-7	-3	-7	5	Wt(-5,-7,-3,-7,5)	-0.530292	-0.682894	-0.567339	-0.545014	0	12.9488	0.623151	2.06	1.36	3.215	1.36	4.785	-25.7365
-5	-7	-3	-7	7	Wt(-5,-7,-3,-7,7)	-0.530292	-0.682894	-0.567339	-0.545014	-5.28158e-17	12.9488	0.588011	2.06	1.36	3.215	1.36	4.785	-25.7365
-5	-7	-3	-7	9	Wt(-5,-7,-3,-7,9)	-0.530292	-0.682894	-0.567339	-0.545014	0	12.9488	0.552032	2.06	1.36	3.215	1.36	4.785	-25.7365
-5	-7	-3	-9	1	Wt(-5,-7,-3,-9,1)	-0.488947	-0.645077	-0.562695	-0.606011	-2.42476e-17	14.1025	0.684601	2.115	1.335	3.225	1.335	4.805	-26.8596
-5	-7	-3	-9	3	Wt(-5,-7,-3,-9,3)	-0.488947	-0.645077	-0.562695	-0.606011	-2.42476e-17	14.1025	0.662776	2.115	1.335	3.225	1.335	4.805	-26.8596
-5	-7	-3	-9	5	Wt(-5,-7,-3,-9,5)	-0.488947	-0.645077	-0.562695	-0.606011	2.42476e-17	14.1025	0.634964	2.115	1.335	3.225	1.335	4.805	-26.8596
-5	-7	-3	-9	7	Wt(-5,-7,-3,-9,7)	-0.488947	-0.645077	-0.562695	-0.606011	0	14.1025	0.603569	2.115	1.335	3.225	1.335	4.805	-26.8596
-5	-7	-3	-9	9	Wt(-5,-7,-3,-9,9)	-0.488947	-0.645077	-0.562695	-0.606011	-2.42476e-17	14.1025	0.570664	2.115	1.335	3.225	1.335	4.805	-26.8596
-5	-7	-5	-1	1	Wt(-5,-7,-5,-1,1)	-0.61753	-0.747868	-0.604421	-0.273656	2.94317e-17	11.6185	0.667481	1.89	1.25	3.1	1.825	4.825	-25.5518
-5	-7	-5	-1	3	Wt(-5,-7,-5,-1,3)	-0.61753	-0.747868	-0.604421	-0.273656	0	11.6185	0.634192	1.89	1.25	3.1	1.825	4.825	-25.5518
-5	-7	-5	-1	5	Wt(-5,-7,-5,-1,5)	-0.61753	-0.747868	-0.604421	-0.273656	0	11.6185	0.59571	1.89	1.25	3.1	1.825	4.825	-25.5518
-5	-7	-5	-1	7	Wt(-5,-7,-5,-1,7)	-0.61753	-0.747868	-0.604421	-0.273656	2.94317e-17	11.6185	0.555613	1.89	1.25	3.1	1.825	4.825	-25.5518
-5	-7	-5	-1	9	Wt(-5,-7,-5,-1,9)	-0.61753	-0.747868	-0.604421	-0.273656	-2.94317e-17	11.6185	0.516362	1.89	1.25	3.1	1.825	4.825	-25.5518
-5	-7	-5	-3	1	Wt(-5,-7,-5,-3,1)	-0.586821	-0.72858	-0.62006	-0.380307	2.78567e-17	12.2754	0.671885	1.945	1.245	3.11	1.71	4.805	-27.0919
-5	-7	-5	-3	3	Wt(-5,-7,-5,-3,3)	-0.586821	-0.72858	-0.62006	-0.380307	0	12.2754	0.641701	1.945	1.245	3.11	1.71	4.805	-27.0919
-5	-7	-5	-3	5	Wt(-5,-7,-5,-3,5)	-0.586821	-0.72858	-0.62006	-0.380307	2.78567e-17	12.2754	0.606091	1.945	1.245	3.11	1.71	4.805	-27.0919
-5	-7	-5	-3	7	Wt(-5,-7,-5,-3,7)	-0.586821	-0.72858	-0.62006	-0.380307	-2.78567e-17	12.2754	0.568292	1.945	1.245	3.11	1.71	4.805	-27.0919
-5	-7	-5	-3	9	Wt(-5,-7,-5,-3,9)	-0.586821	-0.72858	-0.62006	-0.380307	0	12.2754	0.530668	1.945	1.245	3.11	1.71	4.805	-27.0919
-5	-7	-5	-5	1	Wt(-5,-7,-5,-5,1)	-0.550908	-0.700663	-0.62467	-0.469036	-2.60481e-17	13.1277	0.676353	1.97	1.3	3.16	1.545	4.785	-28.5163
-5	-7	-5	-5	3	Wt(-5,-7,-5,-5,3)	-0.550908	-0.700663	-0.62467	-0.469036	0	13.1277	0.649624	1.97	1.3	3.16	1.545	4.785	-28.5163
-5	-7	-5	-5	5	Wt(-5,-7,-5,-5,5)	-0.550908	-0.700663	-0.62467	-0.469036	0	13.1277	0.617386	1.97	1.3	3.16	1.545	4.785	-28.5163
-5	-7	-5	-5	7	Wt(-5,-7,-5,-5,7)	-0.550908	-0.700663	-0.62467	-0.469036	0	13.1277	0.58244	1.97	1.3	3.16	1.545	4.785	-28.5163
-5	-7	-5	-5	9	Wt(-5,-7,-5,-5,9)	-0.550908	-0.700663	-0.62467	-0.469036	-2.60481e-17	13.1277	0.54698	1.97	1.3	3.16	1.545	4.785	-28.5163
-5	-7	-5	-7	1	Wt(-5,-7,-5,-7,1)	-0.513492	-0.668493	-0.621598	-0.540751	2.4183e-17	14.1402	0.680484	1.965	1.37	3.19	1.42	4.815	-29.7613
-5	-7	-5	-7	3	Wt(-5,-7,-5,-7,3)	-0.513492	-0.668493	-0.621598	-0.540751	-2.4183e-17	14.1402	0.6572	1.965	1.37	3.19	1.42	4.815	-29.7613
-5	-7	-5	-7	5	Wt(-5,-7,-5,-7,5)	-0.513492	-0.668493	-0.621598	-0.540751	-2.4183e-17	14.1402	0.628489	1.965	1.37	3.19	1.42	4.815	-29.7613
-5	-7	-5	-7	7	Wt(-5,-7,-5,-7,7)	-0.513492	-0.668493	-0.621598	-0.540751	-2.4183e-17	14.1402	0.596695	1.965	1.37	3.19	1.42	4.815	-29.7613
-5	-7	-5	-7	9	Wt(-5,-7,-5,-7,9)	-0.513492	-0.668493	-0.621598	-0.540751	-4.8366e-17	14.1402	0.563772	1.965	1.37	3.19	1.42	4.815	-29.7613
-5	-7	-5	-9	1	Wt(-5,-7,-5,-9,1)	-0.477035	-0.635242	-0.613738	-0.59782	0	15.2809	0.684087	2.105	1.39	3.19	1.32	4.795	-30.9038
-5	-7	-5	-9	3	Wt(-5,-7,-5,-9,3)	-0.477035	-0.635242	-0.613738	-0.59782	0	15.2809	0.664005	2.105	1.39	3.19	1.32	4.795	-30.9038
-5	-7	-5	-9	5	Wt(-5,-7,-5,-9,5)	-0.477035	-0.635242	-0.613738	-0.59782	0	15.2809	0.638721	2.105	1.39	3.19	1.32	4.795	-30.9038
-5	-7	-5	-9	7	Wt(-5,-7,-5,-9,7)	-0.477035	-0.635242	-0.613738	-0.59782	0	15.2809	0.61014	2.105	1.39	3.19	1.32	4.795	-30.9038
-5	-7	-5	-9	9	Wt(-5,-7,-5,-9,9)	-0.477035	-0.635242	-0.613738	-0.59782	-4.47553e-17	15.2809	0.579951	2.105	1.39	3.19	1.32	4.795	-30.9038
-5	-7	-7	-1	1	Wt(-5,-7,-7,-1,1)	-0.587526	-0.721819	-0.657124	-0.292521	0	12.8828	0.668869	1.89	1.25	3.1	1.825	4.825	-29.4784
-5	-7	-7	-1	3	Wt(-5,-7,-7,-1,3)	-0.587526	-0.721819	-0.657124	-0.292521	2.65433e-17	12.8828	0.639487	1.89	1.25	3.1	1.825	4.825	-29.4784
-5	-7	-7	-1	5	Wt(-5,-7,-7,-1,5)	-0.587526	-0.721819	-0.657124	-0.292521	0	12.8828	0.605397	1.89	1.25	3.1	1.825	4.825	-29.4784
-5	-7	-7	-1	7	Wt(-5,-7,-7,-1,7)	-0.587526	-0.721819	-0.657124	-0.292521	0	12.8828	0.569373	1.89	1.25	3.1	1.825	4.825	-29.4784
-5	-7	-7	-1	9	Wt(-5,-7,-7,-1,9)	-0.587526	-0.721819	-0.657124	-0.292521	2.65433e-17	12.8828	0.533466	1.89	1.25	3.1	1.825	4.825	-29.4784
-5	-7	-7	-3	1	Wt(-5,-7,-7,-3,1)	-0.56008	-0.704262	-0.667481	-0.387564	-2.52078e-17	13.5653	0.672842	1.87	1.29	3.095	1.735	4.825	-31.017
-5	-7	-7	-3	3	Wt(-5,-7,-7,-3,3)	-0.56008	-0.704262	-0.667481	-0.387564	-2.52078e-17	13.5653	0.646081	1.87	1.29	3.095	1.735	4.825	-31.017
-5	-7	-7	-3	5	Wt(-5,-7,-7,-3,5)	-0.56008	-0.704262	-0.667481	-0.387564	-5.04156e-17	13.5653	0.61449	1.87	1.29	3.095	1.735	4.825	-31.017
-5	-7	-7	-3	7	Wt(-5,-7,-7,-3,7)	-0.56008	-0.704262	-0.667481	-0.387564	-2.52078e-17	13.5653	0.580568	1.87	1.29	3.095	1.735	4.825	-31.017
-5	-7	-7	-3	9	Wt(-5,-7,-7,-3,9)	-0.56008	-0.704262	-0.667481	-0.387564	0	13.5653	0.546258	1.87	1.29	3.095	1.735	4.825	-31.017
-5	-7	-7	-5	1	Wt(-5,-7,-7,-5,1)	-0.528761	-0.680023	-0.668623	-0.467749	-2.37087e-17	14.4231	0.67683	1.955	1.305	3.135	1.585	4.785	-32.4874
-5	-7	-7	-5	3	Wt(-5,-7,-7,-5,3)	-0.528761	-0.680023	-0.668623	-0.467749	2.37087e-17	14.4231	0.652919	1.955	1.305	3.135	1.585	4.785	-32.4874
-5	-7	-7	-5	5	Wt(-5,-7,-7,-5,5)	-0.528761	-0.680023	-0.668623	-0.467749	0	14.4231	0.624168	1.955	1.305	3.135	1.585	4.785	-32.4874
-5	-7	-7	-5	7	Wt(-5,-7,-7,-5,7)	-0.528761	-0.680023	-0.668623	-0.467749	-2.37087e-17	14.4231	0.592746	1.955	1.305	3.135	1.585	4.785	-32.4874
-5	-7	-7	-5	9	Wt(-5,-7,-7,-5,9)	-0.528761	-0.680023	-0.668623	-0.467749	2.37087e-17	14.4231	0.560437	1.955	1.305	3.135	1.585	4.785	-32.4874
-5	-7	-7	-7	1	Wt(-5,-7,-7,-7,1)	-0.496215	-0.652272	-0.663297	-0.533829	0	15.4269	0.680543	2.04	1.41	3.165	1.36	4.785	-33.7536
-5	-7	-7	-7	3	Wt(-5,-7,-7,-7,3)	-0.496215	-0.652272	-0.663297	-0.533829	2.2166e-17	15.4269	0.659467	2.04	1.41	3.165	1.36	4.785	-33.7536
-5	-7	-7	-7	5	Wt(-5,-7,-7,-7,5)	-0.496215	-0.652272	-0.663297	-0.533829	0	15.4269	0.633656	2.04	1.41	3.165	1.36	4.785	-33.7536
-5	-7	-7	-7	7	Wt(-5,-7,-7,-7,7)	-0.496215	-0.652272	-0.663297	-0.533829	-2.2166e-17	15.4269	0.604938	2.04	1.41	3.165	1.36	4.785	-33.7536
-5	-7	-7	-7	9	Wt(-5,-7,-7,-7,9)	-0.496215	-0.652272	-0.663297	-0.533829	-2.2166e-17	15.4269	0.574901	2.04	1.41	3.165	1.36	4.785	-33.7536
-5	-7	-7	-9	1	Wt(-5,-7,-7,-9,1)	-0.46427	-0.623378	-0.653867	-0.587563	0	16.5501	0.683832	2.12	1.415	3.165	1.32	4.76	-34.8921
-5	-7	-7	-9	3	Wt(-5,-7,-7,-9,3)	-0.46427	-0.623378	-0.653867	-0.587563	-2.06615e-17	16.5501	0.665418	2.12	1.415	3.165	1.32	4.76	-34.8921
-5	-7	-7	-9	5	Wt(-5,-7,-7,-9,5)	-0.46427	-0.623378	-0.653867	-0.587563	2.06615e-17	16.5501	0.642465	2.12	1.415	3.165	1.32	4.76	-34.8921
-5	-7	-7	-9	7	Wt(-5,-7,-7,-9,7)	-0.46427	-0.623378	-0.653867	-0.587563	-2.06615e-17	16.5501	0.616485	2.12	1.415	3.165	1.32	4.76	-34.8921
-5	-7	-7	-9	9	Wt(-5,-7,-7,-9,9)	-0.46427	-0.623378	-0.653867	-0.587563	0	16.5501	0.588851	2.12	1.415	3.165	1.32	4.76	-34.8921
-5	-7	-9	-1	1	Wt(-5,-7,-9,-1,1)	-0.559298	-0.695961	-0.695944	-0.306051	4.80344e-17	14.2378	0.670369	1.84	1.315	3.06	1.87	4.84	-33.3819
-5	-7	-9	-1	3	Wt(-5,-7,-9,-1,3)	-0.559298	-0.695961	-0.695944	-0.306051	9.60689e-17	14.2378	0.644392	1.84	1.315	3.06	1.87	4.84	-33.3819
-5	-7	-9	-1	5	Wt(-5,-7,-9,-1,5)	-0.559298	-0.695961	-0.695944	-0.306051	-4.80344e-17	14.2378	0.614173	1.84	1.315	3.06	1.87	4.84	-33.3819
-5	-7	-9	-1	7	Wt(-5,-7,-9,-1,7)	-0.559298	-0.695961	-0.695944	-0.306051	0	14.2378	0.581861	1.84	1.315	3.06	1.87	4.84	-33.3819
-5	-7	-9	-1	9	Wt(-5,-7,-9,-1,9)	-0.559298	-0.695961	-0.695944	-0.306051	-4.80344e-17	14.2378	0.549146	1.84	1.315	3.06	1.87	4.84	-33.3819
-5	-7	-9	-3	1	Wt(-5,-7,-9,-3,1)	-0.535028	-0.680408	-0.702785	-0.391399	4.5785e-17	14.9373	0.673914	1.87	1.29	3.095	1.735	4.825	-34.9388
-5	-7	-9	-3	3	Wt(-5,-7,-9,-3,3)	-0.535028	-0.680408	-0.702785	-0.391399	-2.28925e-17	14.9373	0.650132	1.87	1.29	3.095	1.735	4.825	-34.9388
-5	-7	-9	-3	5	Wt(-5,-7,-9,-3,5)	-0.535028	-0.680408	-0.702785	-0.391399	-4.5785e-17	14.9373	0.622058	1.87	1.29	3.095	1.735	4.825	-34.9388
-5	-7	-9	-3	7	Wt(-5,-7,-9,-3,7)	-0.535028	-0.680408	-0.702785	-0.391399	-4.5785e-17	14.9373	0.591627	1.87	1.29	3.095	1.735	4.825	-34.9388
-5	-7	-9	-3	9	Wt(-5,-7,-9,-3,9)	-0.535028	-0.680408	-0.702785	-0.391399	2.28925e-17	14.9373	0.560422	1.87	1.29	3.095	1.735	4.825	-34.9388
-5	-7	-9	-5	1	Wt(-5,-7,-9,-5,1)	-0.507787	-0.659567	-0.701907	-0.464408	-2.16492e-17	15.7951	0.677452	1.95	1.285	3.1	1.675	4.79	-36.4358
-5	-7	-9	-5	3	Wt(-5,-7,-9,-5,3)	-0.507787	-0.659567	-0.701907	-0.464408	-2.16492e-17	15.7951	0.65602	1.95	1.285	3.1	1.675	4.79	-36.4358
-5	-7	-9	-5	5	Wt(-5,-7,-9,-5,5)	-0.507787	-0.659567	-0.701907	-0.464408	-4.32984e-17	15.7951	0.630328	1.95	1.285	3.1	1.675	4.79	-36.4358
-5	-7	-9	-5	7	Wt(-5,-7,-9,-5,7)	-0.507787	-0.659567	-0.701907	-0.464408	-4.32984e-17	15.7951	0.602063	1.95	1.285	3.1	1.675	4.79	-36.4358
-5	-7	-9	-5	9	Wt(-5,-7,-9,-5,9)	-0.507787	-0.659567	-0.701907	-0.464408	-2.16492e-17	15.7951	0.572671	1.95	1.285	3.1	1.675	4.79	-36.4358
-5	-7	-9	-7	1	Wt(-5,-7,-9,-7,1)	-0.479491	-0.635754	-0.695519	-0.525663	-2.037e-17	16.787	0.680769	1.99	1.39	3.135	1.435	4.81	-37.7179
-5	-7	-9	-7	3	Wt(-5,-7,-9,-7,3)	-0.479491	-0.635754	-0.695519	-0.525663	2.037e-17	16.787	0.661676	1.99	1.39	3.135	1.435	4.81	-37.7179
-5	-7	-9	-7	5	Wt(-5,-7,-9,-7,5)	-0.479491	-0.635754	-0.695519	-0.525663	-4.07399e-17	16.787	0.638433	1.99	1.39	3.135	1.435	4.81	-37.7179
-5	-7	-9	-7	7	Wt(-5,-7,-9,-7,7)	-0.479491	-0.635754	-0.695519	-0.525663	-2.037e-17	16.787	0.612477	1.99	1.39	3.135	1.435	4.81	-37.7179
-5	-7	-9	-7	9	Wt(-5,-7,-9,-7,9)	-0.479491	-0.635754	-0.695519	-0.525663	2.037e-17	16.787	0.585094	1.99	1.39	3.135	1.435	4.81	-37.7179
-5	-7	-9	-9	1	Wt(-5,-7,-9,-9,1)	-0.451514	-0.610757	-0.685532	-0.576457	-1.91133e-17	17.8908	0.683752	2.12	1.415	3.165	1.32	4.76	-38.8712
-5	-7	-9	-9	3	Wt(-5,-7,-9,-9,3)	-0.451514	-0.610757	-0.685532	-0.576457	0	17.8908	0.666872	2.12	1.415	3.165	1.32	4.76	-38.8712
-5	-7	-9	-9	5	Wt(-5,-7,-9,-9,5)	-0.451514	-0.610757	-0.685532	-0.576457	1.91133e-17	17.8908	0.646017	2.12	1.415	3.165	1.32	4.76	-38.8712
-5	-7	-9	-9	7	Wt(-5,-7,-9,-9,7)	-0.451514	-0.610757	-0.685532	-0.576457	1.91133e-17	17.8908	0.622388	2.12	1.415	3.165	1.32	4.76	-38.8712
-5	-7	-9	-9	9	Wt(-5,-7,-9,-9,9)	-0.451514	-0.610757	-0.685532	-0.576457	-3.82266e-17	17.8908	0.597104	2.12	1.415	3.165	1.32	4.76	-38.8712
-5	-9	-1	-1	1	Wt(-5,-9,-1,-1,1)	-0.645279	-0.804418	-0.427693	-0.203291	0	11.0971	0.670745	1.885	1.16	3.33	2.165	4.77	-19.5032
-5	-9	-1	-1	3	Wt(-5,-9,-1,-1,3)	-0.645279	-0.804418	-0.427693	-0.203291	3.08144e-17	11.0971	0.63657	1.885	1.16	3.33	2.165	4.77	-19.5032
-5	-9	-1	-1	5	Wt(-5,-9,-1,-1,5)	-0.645279	-0.804418	-0.427693	-0.203291	9.24432e-17	11.0971	0.596415	1.885	1.16	3.33	2.165	4.77	-19.5032
-5	-9	-1	-1	7	Wt(-5,-9,-1,-1,7)	-0.645279	-0.804418	-0.427693	-0.203291	-3.08144e-17	11.0971	0.554428	1.885	1.16	3.33	2.165	4.77	-19.5032
-5	-9	-1	-1	9	Wt(-5,-9,-1,-1,9)	-0.645279	-0.804418	-0.427693	-0.203291	-3.08144e-17	11.0971	0.513425	1.885	1.16	3.33	2.165	4.77	-19.5032
-5	-9	-1	-3	1	Wt(-5,-9,-1,-3,1)	-0.61843	-0.789761	-0.458927	-0.322133	-2.94144e-17	11.6253	0.674429	1.975	1.2	3.21	1.7	4.835	-21.1872
-5	-9	-1	-3	3	Wt(-5,-9,-1,-3,3)	-0.61843	-0.789761	-0.458927	-0.322133	2.94144e-17	11.6253	0.643077	1.975	1.2	3.21	1.7	4.835	-21.1872
-5	-9	-1	-3	5	Wt(-5,-9,-1,-3,5)	-0.61843	-0.789761	-0.458927	-0.322133	5.88287e-17	11.6253	0.605519	1.975	1.2	3.21	1.7	4.835	-21.1872
-5	-9	-1	-3	7	Wt(-5,-9,-1,-3,7)	-0.61843	-0.789761	-0.458927	-0.322133	0	11.6253	0.565564	1.975	1.2	3.21	1.7	4.835	-21.1872
-5	-9	-1	-3	9	Wt(-5,-9,-1,-3,9)	-0.61843	-0.789761	-0.458927	-0.322133	0	11.6253	0.525951	1.975	1.2	3.21	1.7	4.835	-21.1872
-5	-9	-1	-5	1	Wt(-5,-9,-1,-5,1)	-0.583351	-0.76257	-0.478776	-0.422985	0	12.3736	0.678423	2.05	1.275	3.21	1.485	4.765	-22.5552
-5	-9	-1	-5	3	Wt(-5,-9,-1,-5,3)	-0.583351	-0.76257	-0.478776	-0.422985	0	12.3736	0.650496	2.05	1.275	3.21	1.485	4.765	-22.5552
-5	-9	-1	-5	5	Wt(-5,-9,-1,-5,5)	-0.583351	-0.76257	-0.478776	-0.422985	2.76356e-17	12.3736	0.616276	2.05	1.275	3.21	1.485	4.765	-22.5552
-5	-9	-1	-5	7	Wt(-5,-9,-1,-5,7)	-0.583351	-0.76257	-0.478776	-0.422985	-2.76356e-17	12.3736	0.5791	2.05	1.275	3.21	1.485	4.765	-22.5552
-5	-9	-1	-5	9	Wt(-5,-9,-1,-5,9)	-0.583351	-0.76257	-0.478776	-0.422985	-2.76356e-17	12.3736	0.541533	2.05	1.275	3.21	1.485	4.765	-22.5552
-5	-9	-1	-7	1	Wt(-5,-9,-1,-7,1)	-0.544677	-0.728323	-0.489535	-0.505289	-2.57013e-17	13.3048	0.682251	2.1	1.305	3.3	1.345	4.84	-23.7421
-5	-9	-1	-7	3	Wt(-5,-9,-1,-7,3)	-0.544677	-0.728323	-0.489535	-0.505289	-5.14025e-17	13.3048	0.657899	2.1	1.305	3.3	1.345	4.84	-23.7421
-5	-9	-1	-7	5	Wt(-5,-9,-1,-7,5)	-0.544677	-0.728323	-0.489535	-0.505289	-2.57013e-17	13.3048	0.627352	2.1	1.305	3.3	1.345	4.84	-23.7421
-5	-9	-1	-7	7	Wt(-5,-9,-1,-7,7)	-0.544677	-0.728323	-0.489535	-0.505289	-5.14025e-17	13.3048	0.593414	2.1	1.305	3.3	1.345	4.84	-23.7421
-5	-9	-1	-7	9	Wt(-5,-9,-1,-7,9)	-0.544677	-0.728323	-0.489535	-0.505289	-2.57013e-17	13.3048	0.55839	2.1	1.305	3.3	1.345	4.84	-23.7421
-5	-9	-1	-9	1	Wt(-5,-9,-1,-9,1)	-0.505821	-0.691393	-0.49377	-0.57091	4.75474e-17	14.3836	0.685648	2.145	1.345	3.38	1.27	4.805	-24.8186
-5	-9	-1	-9	3	Wt(-5,-9,-1,-9,3)	-0.505821	-0.691393	-0.49377	-0.57091	0	14.3836	0.6647	2.145	1.345	3.38	1.27	4.805	-24.8186
-5	-9	-1	-9	5	Wt(-5,-9,-1,-9,5)	-0.505821	-0.691393	-0.49377	-0.57091	-4.75474e-17	14.3836	0.637823	2.145	1.345	3.38	1.27	4.805	-24.8186
-5	-9	-1	-9	7	Wt(-5,-9,-1,-9,7)	-0.505821	-0.691393	-0.49377	-0.57091	2.37737e-17	14.3836	0.607293	2.145	1.345	3.38	1.27	4.805	-24.8186
-5	-9	-1	-9	9	Wt(-5,-9,-1,-9,9)	-0.505821	-0.691393	-0.49377	-0.57091	0	14.3836	0.575111	2.145	1.345	3.38	1.27	4.805	-24.8186
-5	-9	-3	-1	1	Wt(-5,-9,-3,-1,1)	-0.627366	-0.791928	-0.51396	-0.236247	0	12.0423	0.670309	1.925	1.185	3.205	1.95	4.79	-23.599
-5	-9	-3	-1	3	Wt(-5,-9,-3,-1,3)	-0.627366	-0.791928	-0.51396	-0.236247	0	12.0423	0.638995	1.925	1.185	3.205	1.95	4.79	-23.599
-5	-9	-3	-1	5	Wt(-5,-9,-3,-1,5)	-0.627366	-0.791928	-0.51396	-0.236247	0	12.0423	0.602349	1.925	1.185	3.205	1.95	4.79	-23.599
-5	-9	-3	-1	7	Wt(-5,-9,-3,-1,7)	-0.627366	-0.791928	-0.51396	-0.236247	-2.83958e-17	12.0423	0.563723	1.925	1.185	3.205	1.95	4.79	-23.599
-5	-9	-3	-1	9	Wt(-5,-9,-3,-1,9)	-0.627366	-0.791928	-0.51396	-0.236247	-2.83958e-17	12.0423	0.525513	1.925	1.185	3.205	1.95	4.79	-23.599
-5	-9	-3	-3	1	Wt(-5,-9,-3,-3,1)	-0.600714	-0.775574	-0.53692	-0.343296	0	12.6244	0.673982	1.945	1.225	3.115	1.74	4.82	-25.1556
-5	-9	-3	-3	3	Wt(-5,-9,-3,-3,3)	-0.600714	-0.775574	-0.53692	-0.343296	-5.41732e-17	12.6244	0.645279	1.945	1.225	3.115	1.74	4.82	-25.1556
-5	-9	-3	-3	5	Wt(-5,-9,-3,-3,5)	-0.600714	-0.775574	-0.53692	-0.343296	-5.41732e-17	12.6244	0.611089	1.945	1.225	3.115	1.74	4.82	-25.1556
-5	-9	-3	-3	7	Wt(-5,-9,-3,-3,7)	-0.600714	-0.775574	-0.53692	-0.343296	2.70866e-17	12.6244	0.574467	1.945	1.225	3.115	1.74	4.82	-25.1556
-5	-9	-3	-3	9	Wt(-5,-9,-3,-3,9)	-0.600714	-0.775574	-0.53692	-0.343296	-2.70866e-17	12.6244	0.537715	1.945	1.225	3.115	1.74	4.82	-25.1556
-5	-9	-3	-5	1	Wt(-5,-9,-3,-5,1)	-0.567882	-0.749407	-0.549601	-0.434386	-2.55096e-17	13.4048	0.677844	2.05	1.275	3.21	1.485	4.765	-26.5794
-5	-9	-3	-5	3	Wt(-5,-9,-3,-5,3)	-0.567882	-0.749407	-0.549601	-0.434386	-2.55096e-17	13.4048	0.652163	2.05	1.275	3.21	1.485	4.765	-26.5794
-5	-9	-3	-5	5	Wt(-5,-9,-3,-5,5)	-0.567882	-0.749407	-0.549601	-0.434386	5.10193e-17	13.4048	0.620959	2.05	1.275	3.21	1.485	4.765	-26.5794
-5	-9	-3	-5	7	Wt(-5,-9,-3,-5,7)	-0.567882	-0.749407	-0.549601	-0.434386	2.55096e-17	13.4048	0.586904	2.05	1.275	3.21	1.485	4.765	-26.5794
-5	-9	-3	-5	9	Wt(-5,-9,-3,-5,9)	-0.567882	-0.749407	-0.549601	-0.434386	-2.55096e-17	13.4048	0.552134	2.05	1.275	3.21	1.485	4.765	-26.5794
-5	-9	-3	-7	1	Wt(-5,-9,-3,-7,1)	-0.53243	-0.717718	-0.554398	-0.509489	-2.38273e-17	14.3512	0.681521	2.055	1.32	3.225	1.395	4.8	-27.8246
-5	-9	-3	-7	3	Wt(-5,-9,-3,-7,3)	-0.53243	-0.717718	-0.554398	-0.509489	-2.38273e-17	14.3512	0.658945	2.055	1.32	3.225	1.395	4.8	-27.8246
-5	-9	-3	-7	5	Wt(-5,-9,-3,-7,5)	-0.53243	-0.717718	-0.554398	-0.509489	0	14.3512	0.630949	2.055	1.32	3.225	1.395	4.8	-27.8246
-5	-9	-3	-7	7	Wt(-5,-9,-3,-7,7)	-0.53243	-0.717718	-0.554398	-0.509489	2.38273e-17	14.3512	0.599791	2.055	1.32	3.225	1.395	4.8	-27.8246
-5	-9	-3	-7	9	Wt(-5,-9,-3,-7,9)	-0.53243	-0.717718	-0.554398	-0.509489	-2.38273e-17	14.3512	0.567383	2.055	1.32	3.225	1.395	4.8	-27.8246
-5	-9	-3	-9	1	Wt(-5,-9,-3,-9,1)	-0.496964	-0.683893	-0.553697	-0.570248	0	15.4332	0.684805	2.115	1.335	3.225	1.335	4.805	-28.9582
-5	-9	-3	-9	3	Wt(-5,-9,-3,-9,3)	-0.496964	-0.683893	-0.553697	-0.570248	2.21569e-17	15.4332	0.665185	2.115	1.335	3.225	1.335	4.805	-28.9582
-5	-9	-3	-9	5	Wt(-5,-9,-3,-9,5)	-0.496964	-0.683893	-0.553697	-0.570248	-2.21569e-17	15.4332	0.640371	2.115	1.335	3.225	1.335	4.805	-28.9582
-5	-9	-3	-9	7	Wt(-5,-9,-3,-9,7)	-0.496964	-0.683893	-0.553697	-0.570248	-4.43138e-17	15.4332	0.612218	2.115	1.335	3.225	1.335	4.805	-28.9582
-5	-9	-3	-9	9	Wt(-5,-9,-3,-9,9)	-0.496964	-0.683893	-0.553697	-0.570248	2.21569e-17	15.4332	0.582387	2.115	1.335	3.225	1.335	4.805	-28.9582
-5	-9	-5	-1	1	Wt(-5,-9,-5,-1,1)	-0.604955	-0.772187	-0.580849	-0.261336	-2.60236e-17	13.14	0.670622	1.89	1.25	3.1	1.825	4.825	-27.5696
-5	-9	-5	-1	3	Wt(-5,-9,-5,-1,3)	-0.604955	-0.772187	-0.580849	-0.261336	-2.60236e-17	13.14	0.642274	1.89	1.25	3.1	1.825	4.825	-27.5696
-5	-9	-5	-1	5	Wt(-5,-9,-5,-1,5)	-0.604955	-0.772187	-0.580849	-0.261336	-2.60236e-17	13.14	0.609149	1.89	1.25	3.1	1.825	4.825	-27.5696
-5	-9	-5	-1	7	Wt(-5,-9,-5,-1,7)	-0.604955	-0.772187	-0.580849	-0.261336	0	13.14	0.573919	1.89	1.25	3.1	1.825	4.825	-27.5696
-5	-9	-5	-1	9	Wt(-5,-9,-5,-1,9)	-0.604955	-0.772187	-0.580849	-0.261336	0	13.14	0.5386	1.89	1.25	3.1	1.825	4.825	-27.5696
-5	-9	-5	-3	1	Wt(-5,-9,-5,-3,1)	-0.579728	-0.755818	-0.597427	-0.357735	0	13.7613	0.674128	1.945	1.225	3.115	1.74	4.82	-29.0962
-5	-9	-5	-3	3	Wt(-5,-9,-5,-3,3)	-0.579728	-0.755818	-0.597427	-0.357735	2.48487e-17	13.7613	0.648104	1.945	1.225	3.115	1.74	4.82	-29.0962
-5	-9	-5	-3	5	Wt(-5,-9,-5,-3,5)	-0.579728	-0.755818	-0.597427	-0.357735	4.96974e-17	13.7613	0.617213	1.945	1.225	3.115	1.74	4.82	-29.0962
-5	-9	-5	-3	7	Wt(-5,-9,-5,-3,7)	-0.579728	-0.755818	-0.597427	-0.357735	-2.48487e-17	13.7613	0.58388	1.945	1.225	3.115	1.74	4.82	-29.0962
-5	-9	-5	-3	9	Wt(-5,-9,-5,-3,9)	-0.579728	-0.755818	-0.597427	-0.357735	2.48487e-17	13.7613	0.550019	1.945	1.225	3.115	1.74	4.82	-29.0962
-5	-9	-5	-5	1	Wt(-5,-9,-5,-5,1)	-0.549834	-0.731751	-0.605038	-0.440323	-4.69658e-17	14.5617	0.677742	1.97	1.3	3.16	1.545	4.785	-30.577
-5	-9	-5	-5	3	Wt(-5,-9,-5,-5,3)	-0.549834	-0.731751	-0.605038	-0.440323	0	14.5617	0.654323	1.97	1.3	3.16	1.545	4.785	-30.577
-5	-9	-5	-5	5	Wt(-5,-9,-5,-5,5)	-0.549834	-0.731751	-0.605038	-0.440323	4.69658e-17	14.5617	0.626042	1.97	1.3	3.16	1.545	4.785	-30.577
-5	-9	-5	-5	7	Wt(-5,-9,-5,-5,7)	-0.549834	-0.731751	-0.605038	-0.440323	0	14.5617	0.595023	1.97	1.3	3.16	1.545	4.785	-30.577
-5	-9	-5	-5	9	Wt(-5,-9,-5,-5,9)	-0.549834	-0.731751	-0.605038	-0.440323	-2.34829e-17	14.5617	0.563029	1.97	1.3	3.16	1.545	4.785	-30.577
-5	-9	-5	-7	1	Wt(-5,-9,-5,-7,1)	-0.51795	-0.703261	-0.605885	-0.509285	-4.40843e-17	15.5135	0.681179	2.055	1.32	3.225	1.395	4.8	-31.87
-5	-9	-5	-7	3	Wt(-5,-9,-5,-7,3)	-0.51795	-0.703261	-0.605885	-0.509285	-2.20422e-17	15.5135	0.660411	2.055	1.32	3.225	1.395	4.8	-31.87
-5	-9	-5	-7	5	Wt(-5,-9,-5,-7,5)	-0.51795	-0.703261	-0.605885	-0.509285	-2.20422e-17	15.5135	0.634889	2.055	1.32	3.225	1.395	4.8	-31.87
-5	-9	-5	-7	7	Wt(-5,-9,-5,-7,7)	-0.51795	-0.703261	-0.605885	-0.509285	-2.20422e-17	15.5135	0.60642	2.055	1.32	3.225	1.395	4.8	-31.87
-5	-9	-5	-7	9	Wt(-5,-9,-5,-7,9)	-0.51795	-0.703261	-0.605885	-0.509285	-2.20422e-17	15.5135	0.576577	2.055	1.32	3.225	1.395	4.8	-31.87
-5	-9	-5	-9	1	Wt(-5,-9,-5,-9,1)	-0.486052	-0.672942	-0.60205	-0.565966	-2.06111e-17	16.5907	0.684277	2.115	1.335	3.225	1.335	4.805	-33.0045
-5	-9	-5	-9	3	Wt(-5,-9,-5,-9,3)	-0.486052	-0.672942	-0.60205	-0.565966	-2.06111e-17	16.5907	0.666039	2.115	1.335	3.225	1.335	4.805	-33.0045
-5	-9	-5	-9	5	Wt(-5,-9,-5,-9,5)	-0.486052	-0.672942	-0.60205	-0.565966	-2.06111e-17	16.5907	0.643244	2.115	1.335	3.225	1.335	4.805	-33.0045
-5	-9	-5	-9	7	Wt(-5,-9,-5,-9,7)	-0.486052	-0.672942	-0.60205	-0.565966	-4.12221e-17	16.5907	0.617392	2.115	1.335	3.225	1.335	4.805	-33.0045
-5	-9	-5	-9	9	Wt(-5,-9,-5,-9,9)	-0.486052	-0.672942	-0.60205	-0.565966	0	16.5907	0.589855	2.115	1.335	3.225	1.335	4.805	-33.0045
-5	-9	-7	-1	1	Wt(-5,-9,-7,-1,1)	-0.5812	-0.749301	-0.632202	-0.280242	-4.76409e-17	14.3554	0.671358	1.89	1.25	3.1	1.825	4.825	-31.4962
-5	-9	-7	-1	3	Wt(-5,-9,-7,-1,3)	-0.5812	-0.749301	-0.632202	-0.280242	-4.76409e-17	14.3554	0.645824	1.89	1.25	3.1	1.825	4.825	-31.4962
-5	-9	-7	-1	5	Wt(-5,-9,-7,-1,5)	-0.5812	-0.749301	-0.632202	-0.280242	0	14.3554	0.616007	1.89	1.25	3.1	1.825	4.825	-31.4962
-5	-9	-7	-1	7	Wt(-5,-9,-7,-1,7)	-0.5812	-0.749301	-0.632202	-0.280242	0	14.3554	0.584023	1.89	1.25	3.1	1.825	4.825	-31.4962
-5	-9	-7	-1	9	Wt(-5,-9,-7,-1,9)	-0.5812	-0.749301	-0.632202	-0.280242	0	14.3554	0.551553	1.89	1.25	3.1	1.825	4.825	-31.4962
-5	-9	-7	-3	1	Wt(-5,-9,-7,-3,1)	-0.557954	-0.733827	-0.64409	-0.367342	2.27894e-17	15.0049	0.674619	1.945	1.245	3.11	1.71	4.805	-33.0345
-5	-9	-7	-3	3	Wt(-5,-9,-7,-3,3)	-0.557954	-0.733827	-0.64409	-0.367342	-2.27894e-17	15.0049	0.651111	1.945	1.245	3.11	1.71	4.805	-33.0345
-5	-9	-7	-3	5	Wt(-5,-9,-7,-3,5)	-0.557954	-0.733827	-0.64409	-0.367342	0	15.0049	0.623279	1.945	1.245	3.11	1.71	4.805	-33.0345
-5	-9	-7	-3	7	Wt(-5,-9,-7,-3,7)	-0.557954	-0.733827	-0.64409	-0.367342	2.27894e-17	15.0049	0.59304	1.945	1.245	3.11	1.71	4.805	-33.0345
-5	-9	-7	-3	9	Wt(-5,-9,-7,-3,9)	-0.557954	-0.733827	-0.64409	-0.367342	-2.27894e-17	15.0049	0.561976	1.945	1.245	3.11	1.71	4.805	-33.0345
-5	-9	-7	-5	1	Wt(-5,-9,-7,-5,1)	-0.531126	-0.712247	-0.648266	-0.442622	-4.3239e-17	15.8168	0.677939	1.945	1.245	3.11	1.71	4.805	-34.5215
-5	-9	-7	-5	3	Wt(-5,-9,-7,-5,3)	-0.531126	-0.712247	-0.648266	-0.442622	-6.48585e-17	15.8168	0.656651	1.945	1.245	3.11	1.71	4.805	-34.5215
-5	-9	-7	-5	5	Wt(-5,-9,-7,-5,5)	-0.531126	-0.712247	-0.648266	-0.442622	-4.3239e-17	15.8168	0.631071	1.945	1.245	3.11	1.71	4.805	-34.5215
-5	-9	-7	-5	7	Wt(-5,-9,-7,-5,7)	-0.531126	-0.712247	-0.648266	-0.442622	2.16195e-17	15.8168	0.602886	1.945	1.245	3.11	1.71	4.805	-34.5215
-5	-9	-7	-5	9	Wt(-5,-9,-7,-5,9)	-0.531126	-0.712247	-0.648266	-0.442622	-2.16195e-17	15.8168	0.573542	1.945	1.245	3.11	1.71	4.805	-34.5215
-5	-9	-7	-7	1	Wt(-5,-9,-7,-7,1)	-0.50272	-0.687037	-0.646634	-0.506322	4.07871e-17	16.7676	0.681102	1.97	1.3	3.16	1.545	4.785	-35.8811
-5	-9	-7	-7	3	Wt(-5,-9,-7,-7,3)	-0.50272	-0.687037	-0.646634	-0.506322	0	16.7676	0.66206	1.97	1.3	3.16	1.545	4.785	-35.8811
-5	-9	-7	-7	5	Wt(-5,-9,-7,-7,5)	-0.50272	-0.687037	-0.646634	-0.506322	2.03936e-17	16.7676	0.638835	1.97	1.3	3.16	1.545	4.785	-35.8811
-5	-9	-7	-7	7	Wt(-5,-9,-7,-7,7)	-0.50272	-0.687037	-0.646634	-0.506322	2.03936e-17	16.7676	0.612871	1.97	1.3	3.16	1.545	4.785	-35.8811
-5	-9	-7	-7	9	Wt(-5,-9,-7,-7,9)	-0.50272	-0.687037	-0.646634	-0.506322	6.11807e-17	16.7676	0.585461	1.97	1.3	3.16	1.545	4.785	-35.8811
-5	-9	-7	-9	1	Wt(-5,-9,-7,-9,1)	-0.474241	-0.660186	-0.640957	-0.559501	-3.83459e-17	17.8351	0.68398	2.13	1.36	3.2	1.335	4.77	-37.048
-5	-9	-7	-9	3	Wt(-5,-9,-7,-9,3)	-0.474241	-0.660186	-0.640957	-0.559501	-3.83459e-17	17.8351	0.667091	2.13	1.36	3.2	1.335	4.77	-37.048
-5	-9	-7	-9	5	Wt(-5,-9,-7,-9,5)	-0.474241	-0.660186	-0.640957	-0.559501	-5.75189e-17	17.8351	0.646191	2.13	1.36	3.2	1.335	4.77	-37.048
-5	-9	-7	-9	7	Wt(-5,-9,-7,-9,7)	-0.474241	-0.660186	-0.640957	-0.559501	0	17.8351	0.622492	2.13	1.36	3.2	1.335	4.77	-37.048
-5	-9	-7	-9	9	Wt(-5,-9,-7,-9,9)	-0.474241	-0.660186	-0.640957	-0.559501	-1.9173e-17	17.8351	0.597125	2.13	1.36	3.2	1.335	4.77	-37.048
-5	-9	-9	-1	1	Wt(-5,-9,-9,-1,1)	-0.557919	-0.725781	-0.671646	-0.29449	-4.36694e-17	15.6609	0.672294	1.89	1.25	3.1	1.825	4.825	-35.4229
-5	-9	-9	-1	3	Wt(-5,-9,-9,-1,3)	-0.557919	-0.725781	-0.671646	-0.29449	-8.73388e-17	15.6609	0.649309	1.89	1.25	3.1	1.825	4.825	-35.4229
-5	-9	-9	-1	5	Wt(-5,-9,-9,-1,5)	-0.557919	-0.725781	-0.671646	-0.29449	-4.36694e-17	15.6609	0.622484	1.89	1.25	3.1	1.825	4.825	-35.4229
-5	-9	-9	-1	7	Wt(-5,-9,-9,-1,7)	-0.557919	-0.725781	-0.671646	-0.29449	-4.36694e-17	15.6609	0.593497	1.89	1.25	3.1	1.825	4.825	-35.4229
-5	-9	-9	-1	9	Wt(-5,-9,-9,-1,9)	-0.557919	-0.725781	-0.671646	-0.29449	-4.36694e-17	15.6609	0.563735	1.89	1.25	3.1	1.825	4.825	-35.4229
-5	-9	-9	-3	1	Wt(-5,-9,-9,-3,1)	-0.536796	-0.7116	-0.680169	-0.373587	-4.18785e-17	16.3307	0.675286	1.945	1.245	3.11	1.71	4.805	-36.9674
-5	-9	-9	-3	3	Wt(-5,-9,-9,-3,3)	-0.536796	-0.7116	-0.680169	-0.373587	4.18785e-17	16.3307	0.654048	1.945	1.245	3.11	1.71	4.805	-36.9674
-5	-9	-9	-3	5	Wt(-5,-9,-9,-3,5)	-0.536796	-0.7116	-0.680169	-0.373587	-4.18785e-17	16.3307	0.628964	1.945	1.245	3.11	1.71	4.805	-36.9674
-5	-9	-9	-3	7	Wt(-5,-9,-9,-3,7)	-0.536796	-0.7116	-0.680169	-0.373587	0	16.3307	0.601553	1.945	1.245	3.11	1.71	4.805	-36.9674
-5	-9	-9	-3	9	Wt(-5,-9,-9,-3,9)	-0.536796	-0.7116	-0.680169	-0.373587	-4.18785e-17	16.3307	0.573112	1.945	1.245	3.11	1.71	4.805	-36.9674
-5	-9	-9	-5	1	Wt(-5,-9,-9,-5,1)	-0.512867	-0.692502	-0.682077	-0.442596	-3.98811e-17	17.1485	0.678308	1.945	1.245	3.11	1.71	4.805	-38.4544
-5	-9	-9	-5	3	Wt(-5,-9,-9,-5,3)	-0.512867	-0.692502	-0.682077	-0.442596	-1.19643e-16	17.1485	0.658954	1.945	1.245	3.11	1.71	4.805	-38.4544
-5	-9	-9	-5	5	Wt(-5,-9,-9,-5,5)	-0.512867	-0.692502	-0.682077	-0.442596	-3.98811e-17	17.1485	0.635803	1.945	1.245	3.11	1.71	4.805	-38.4544
-5	-9	-9	-5	7	Wt(-5,-9,-9,-5,7)	-0.512867	-0.692502	-0.682077	-0.442596	-3.98811e-17	17.1485	0.610196	1.945	1.245	3.11	1.71	4.805	-38.4544
-5	-9	-9	-5	9	Wt(-5,-9,-9,-5,9)	-0.512867	-0.692502	-0.682077	-0.442596	-3.98811e-17	17.1485	0.583318	1.945	1.245	3.11	1.71	4.805	-38.4544
-5	-9	-9	-7	1	Wt(-5,-9,-9,-7,1)	-0.487642	-0.670365	-0.678971	-0.501746	0	18.0945	0.681195	2.045	1.34	3.135	1.485	4.755	-39.8428
-5	-9	-9	-7	3	Wt(-5,-9,-9,-7,3)	-0.487642	-0.670365	-0.678971	-0.501746	0	18.0945	0.663742	2.045	1.34	3.135	1.485	4.755	-39.8428
-5	-9	-9	-7	5	Wt(-5,-9,-9,-7,5)	-0.487642	-0.670365	-0.678971	-0.501746	0	18.0945	0.642596	2.045	1.34	3.135	1.485	4.755	-39.8428
-5	-9	-9	-7	7	Wt(-5,-9,-9,-7,7)	-0.487642	-0.670365	-0.678971	-0.501746	0	18.0945	0.618915	2.045	1.34	3.135	1.485	4.755	-39.8428
-5	-9	-9	-7	9	Wt(-5,-9,-9,-7,9)	-0.487642	-0.670365	-0.678971	-0.501746	-3.77963e-17	18.0945	0.593759	2.045	1.34	3.135	1.485	4.755	-39.8428
-5	-9	-9	-9	1	Wt(-5,-9,-9,-9,1)	-0.462274	-0.646722	-0.672322	-0.551856	0	19.1495	0.683847	2.12	1.415	3.165	1.32	4.76	-41.0414
-5	-9	-9	-9	3	Wt(-5,-9,-9,-9,3)	-0.462274	-0.646722	-0.672322	-0.551856	-3.57139e-17	19.1495	0.668224	2.12	1.415	3.165	1.32	4.76	-41.0414
-5	-9	-9	-9	5	Wt(-5,-9,-9,-9,5)	-0.462274	-0.646722	-0.672322	-0.551856	0	19.1495	0.649059	2.12	1.415	3.165	1.32	4.76	-41.0414
-5	-9	-9	-9	7	Wt(-5,-9,-9,-9,7)	-0.462274	-0.646722	-0.672322	-0.551856	-3.57139e-17	19.1495	0.627333	2.12	1.415	3.165	1.32	4.76	-41.0414
-5	-9	-9	-9	9	Wt(-5,-9,-9,-9,9)	-0.462274	-0.646722	-0.672322	-0.551856	-3.57139e-17	19.1495	0.603977	2.12	1.415	3.165	1.32	4.76	-41.0414
-7	-1	-1	-1	1	Wt(-7,-1,-1,-1,1)	-0.803579	-0.570896	-0.398273	-0.186795	5.04278e-17	6.78102	0.649915	1.545	2.06	3.355	2.025	4.675	-14.0699
-7	-1	-1	-1	3	Wt(-7,-1,-1,-1,3)	-0.803579	-0.570896	-0.398273	-0.186795	-5.04278e-17	6.78102	0.585049	1.545	2.06	3.355	2.025	4.675	-14.0699
-7	-1	-1	-1	5	Wt(-7,-1,-1,-1,5)	-0.803579	-0.570896	-0.398273	-0.186795	0	6.78102	0.517139	1.545	2.06	3.355	2.025	4.675	-14.0699
-7	-1	-1	-1	7	Wt(-7,-1,-1,-1,7)	-0.803579	-0.570896	-0.398273	-0.186795	0	6.78102	0.455462	1.545	2.06	3.355	2.025	4.675	-14.0699
-7	-1	-1	-1	9	Wt(-7,-1,-1,-1,9)	-0.803579	-0.570896	-0.398273	-0.186795	-5.04278e-17	6.78102	0.402733	1.545	2.06	3.355	2.025	4.675	-14.0699
-7	-1	-1	-3	1	Wt(-7,-1,-1,-3,1)	-0.745247	-0.561305	-0.447561	-0.374898	4.65222e-17	7.35029	0.658955	1.65	2.15	3.305	1.485	4.74	-15.526
-7	-1	-1	-3	3	Wt(-7,-1,-1,-3,3)	-0.745247	-0.561305	-0.447561	-0.374898	9.30444e-17	7.35029	0.601355	1.65	2.15	3.305	1.485	4.74	-15.526
-7	-1	-1	-3	5	Wt(-7,-1,-1,-3,5)	-0.745247	-0.561305	-0.447561	-0.374898	0	7.35029	0.538231	1.65	2.15	3.305	1.485	4.74	-15.526
-7	-1	-1	-3	7	Wt(-7,-1,-1,-3,7)	-0.745247	-0.561305	-0.447561	-0.374898	4.65222e-17	7.35029	0.478751	1.65	2.15	3.305	1.485	4.74	-15.526
-7	-1	-1	-3	9	Wt(-7,-1,-1,-3,9)	-0.745247	-0.561305	-0.447561	-0.374898	0	7.35029	0.426466	1.65	2.15	3.305	1.485	4.74	-15.526
-7	-1	-1	-5	1	Wt(-7,-1,-1,-5,1)	-0.667625	-0.531078	-0.470269	-0.514625	0	8.24785	0.668755	1.775	2.065	3.28	1.27	4.78	-16.682
-7	-1	-1	-5	3	Wt(-7,-1,-1,-5,3)	-0.667625	-0.531078	-0.470269	-0.514625	4.14595e-17	8.24785	0.620679	1.775	2.065	3.28	1.27	4.78	-16.682
-7	-1	-1	-5	5	Wt(-7,-1,-1,-5,5)	-0.667625	-0.531078	-0.470269	-0.514625	-4.14595e-17	8.24785	0.564896	1.775	2.065	3.28	1.27	4.78	-16.682
-7	-1	-1	-5	7	Wt(-7,-1,-1,-5,7)	-0.667625	-0.531078	-0.470269	-0.514625	0	8.24785	0.509653	1.775	2.065	3.28	1.27	4.78	-16.682
-7	-1	-1	-5	9	Wt(-7,-1,-1,-5,9)	-0.667625	-0.531078	-0.470269	-0.514625	0	8.24785	0.459109	1.775	2.065	3.28	1.27	4.78	-16.682
-7	-1	-1	-7	1	Wt(-7,-1,-1,-7,1)	-0.590108	-0.494113	-0.476306	-0.611252	0	9.37993	0.677087	1.76	2.26	3.33	1.245	4.795	-17.7358
-7	-1	-1	-7	3	Wt(-7,-1,-1,-7,3)	-0.590108	-0.494113	-0.476306	-0.611252	-1.82278e-17	9.37993	0.638385	1.76	2.26	3.33	1.245	4.795	-17.7358
-7	-1	-1	-7	5	Wt(-7,-1,-1,-7,5)	-0.590108	-0.494113	-0.476306	-0.611252	-3.64556e-17	9.37993	0.590896	1.76	2.26	3.33	1.245	4.795	-17.7358
-7	-1	-1	-7	7	Wt(-7,-1,-1,-7,7)	-0.590108	-0.494113	-0.476306	-0.611252	0	9.37993	0.541367	1.76	2.26	3.33	1.245	4.795	-17.7358
-7	-1	-1	-7	9	Wt(-7,-1,-1,-7,9)	-0.590108	-0.494113	-0.476306	-0.611252	-1.82278e-17	9.37993	0.493994	1.76	2.26	3.33	1.245	4.795	-17.7358
-7	-1	-1	-9	1	Wt(-7,-1,-1,-9,1)	-0.521344	-0.458131	-0.473824	-0.676755	0	10.6722	0.683426	1.795	2.275	3.43	1.205	4.785	-18.7567
-7	-1	-1	-9	3	Wt(-7,-1,-1,-9,3)	-0.521344	-0.458131	-0.473824	-0.676755	0	10.6722	0.652731	1.795	2.275	3.43	1.205	4.785	-18.7567
-7	-1	-1	-9	5	Wt(-7,-1,-1,-9,5)	-0.521344	-0.458131	-0.473824	-0.676755	-1.60207e-17	10.6722	0.613182	1.795	2.275	3.43	1.205	4.785	-18.7567
-7	-1	-1	-9	7	Wt(-7,-1,-1,-9,7)	-0.521344	-0.458131	-0.473824	-0.676755	0	10.6722	0.569934	1.795	2.275	3.43	1.205	4.785	-18.7567
-7	-1	-1	-9	9	Wt(-7,-1,-1,-9,9)	-0.521344	-0.458131	-0.473824	-0.676755	0	10.6722	0.526757	1.795	2.275	3.43	1.205	4.785	-18.7567
-7	-1	-3	-1	1	Wt(-7,-1,-3,-1,1)	-0.756439	-0.580109	-0.536435	-0.240225	4.42672e-17	7.72471	0.651845	1.575	1.915	3.23	2.045	4.73	-18.1472
-7	-1	-3	-1	3	Wt(-7,-1,-3,-1,3)	-0.756439	-0.580109	-0.536435	-0.240225	0	7.72471	0.595721	1.575	1.915	3.23	2.045	4.73	-18.1472
-7	-1	-3	-1	5	Wt(-7,-1,-3,-1,5)	-0.756439	-0.580109	-0.536435	-0.240225	0	7.72471	0.535649	1.575	1.915	3.23	2.045	4.73	-18.1472
-7	-1	-3	-1	7	Wt(-7,-1,-3,-1,7)	-0.756439	-0.580109	-0.536435	-0.240225	0	7.72471	0.479138	1.575	1.915	3.23	2.045	4.73	-18.1472
-7	-1	-3	-1	9	Wt(-7,-1,-3,-1,9)	-0.756439	-0.580109	-0.536435	-0.240225	0	7.72471	0.429155	1.575	1.915	3.23	2.045	4.73	-18.1472
-7	-1	-3	-3	1	Wt(-7,-1,-3,-3,1)	-0.701476	-0.565731	-0.565389	-0.399553	0	8.37089	0.660352	1.71	2.115	3.155	1.46	4.735	-19.565
-7	-1	-3	-3	3	Wt(-7,-1,-3,-3,3)	-0.701476	-0.565731	-0.565389	-0.399553	0	8.37089	0.610675	1.71	2.115	3.155	1.46	4.735	-19.565
-7	-1	-3	-3	5	Wt(-7,-1,-3,-3,5)	-0.701476	-0.565731	-0.565389	-0.399553	0	8.37089	0.555319	1.71	2.115	3.155	1.46	4.735	-19.565
-7	-1	-3	-3	7	Wt(-7,-1,-3,-3,7)	-0.701476	-0.565731	-0.565389	-0.399553	-8.17002e-17	8.37089	0.501444	1.71	2.115	3.155	1.46	4.735	-19.565
-7	-1	-3	-3	9	Wt(-7,-1,-3,-3,9)	-0.701476	-0.565731	-0.565389	-0.399553	0	8.37089	0.452483	1.71	2.115	3.155	1.46	4.735	-19.565
-7	-1	-3	-5	1	Wt(-7,-1,-3,-5,1)	-0.634708	-0.536769	-0.572443	-0.519924	-3.67821e-17	9.29667	0.669064	1.74	2.07	3.215	1.36	4.735	-20.7326
-7	-1	-3	-5	3	Wt(-7,-1,-3,-5,3)	-0.634708	-0.536769	-0.572443	-0.519924	-3.67821e-17	9.29667	0.627098	1.74	2.07	3.215	1.36	4.735	-20.7326
-7	-1	-3	-5	5	Wt(-7,-1,-3,-5,5)	-0.634708	-0.536769	-0.572443	-0.519924	-3.67821e-17	9.29667	0.578109	1.74	2.07	3.215	1.36	4.735	-20.7326
-7	-1	-3	-5	7	Wt(-7,-1,-3,-5,7)	-0.634708	-0.536769	-0.572443	-0.519924	-7.35643e-17	9.29667	0.528397	1.74	2.07	3.215	1.36	4.735	-20.7326
-7	-1	-3	-5	9	Wt(-7,-1,-3,-5,9)	-0.634708	-0.536769	-0.572443	-0.519924	-3.67821e-17	9.29667	0.481607	1.74	2.07	3.215	1.36	4.735	-20.7326
-7	-1	-3	-7	1	Wt(-7,-1,-3,-7,1)	-0.568608	-0.502947	-0.56683	-0.606309	0	10.4279	0.676539	1.79	2.13	3.255	1.255	4.765	-21.8123
-7	-1	-3	-7	3	Wt(-7,-1,-3,-7,3)	-0.568608	-0.502947	-0.56683	-0.606309	-3.27921e-17	10.4279	0.642056	1.79	2.13	3.255	1.255	4.765	-21.8123
-7	-1	-3	-7	5	Wt(-7,-1,-3,-7,5)	-0.568608	-0.502947	-0.56683	-0.606309	0	10.4279	0.599949	1.79	2.13	3.255	1.255	4.765	-21.8123
-7	-1	-3	-7	7	Wt(-7,-1,-3,-7,7)	-0.568608	-0.502947	-0.56683	-0.606309	-3.27921e-17	10.4279	0.555369	1.79	2.13	3.255	1.255	4.765	-21.8123
-7	-1	-3	-7	9	Wt(-7,-1,-3,-7,9)	-0.568608	-0.502947	-0.56683	-0.606309	0	10.4279	0.511807	1.79	2.13	3.255	1.255	4.765	-21.8123
-7	-1	-3	-9	1	Wt(-7,-1,-3,-9,1)	-0.509016	-0.469811	-0.555302	-0.667357	-2.9214e-17	11.705	0.682412	1.79	2.13	3.255	1.255	4.765	-22.8534
-7	-1	-3	-9	3	Wt(-7,-1,-3,-9,3)	-0.509016	-0.469811	-0.555302	-0.667357	-2.9214e-17	11.705	0.654423	1.79	2.13	3.255	1.255	4.765	-22.8534
-7	-1	-3	-9	5	Wt(-7,-1,-3,-9,5)	-0.509016	-0.469811	-0.555302	-0.667357	2.9214e-17	11.705	0.618859	1.79	2.13	3.255	1.255	4.765	-22.8534
-7	-1	-3	-9	7	Wt(-7,-1,-3,-9,7)	-0.509016	-0.469811	-0.555302	-0.667357	2.9214e-17	11.705	0.579712	1.79	2.13	3.255	1.255	4.765	-22.8534
-7	-1	-3	-9	9	Wt(-7,-1,-3,-9,9)	-0.509016	-0.469811	-0.555302	-0.667357	0	11.705	0.540057	1.79	2.13	3.255	1.255	4.765	-22.8534
-7	-1	-5	-1	1	Wt(-7,-1,-5,-1,1)	-0.701182	-0.572312	-0.62805	-0.274817	-3.84403e-17	8.89565	0.655544	1.665	1.835	3.105	1.985	4.74	-22.1328
-7	-1	-5	-1	3	Wt(-7,-1,-5,-1,3)	-0.701182	-0.572312	-0.62805	-0.274817	3.84403e-17	8.89565	0.607982	1.665	1.835	3.105	1.985	4.74	-22.1328
-7	-1	-5	-1	5	Wt(-7,-1,-5,-1,5)	-0.701182	-0.572312	-0.62805	-0.274817	3.84403e-17	8.89565	0.555829	1.665	1.835	3.105	1.985	4.74	-22.1328
-7	-1	-5	-1	7	Wt(-7,-1,-5,-1,7)	-0.701182	-0.572312	-0.62805	-0.274817	-3.84403e-17	8.89565	0.50498	1.665	1.835	3.105	1.985	4.74	-22.1328
-7	-1	-5	-1	9	Wt(-7,-1,-5,-1,9)	-0.701182	-0.572312	-0.62805	-0.274817	0	8.89565	0.458381	1.665	1.835	3.105	1.985	4.74	-22.1328
-7	-1	-5	-3	1	Wt(-7,-1,-5,-3,1)	-0.653687	-0.557652	-0.644272	-0.410356	7.13448e-17	9.58589	0.662921	1.745	2.005	3.125	1.445	4.755	-23.5281
-7	-1	-5	-3	3	Wt(-7,-1,-5,-3,3)	-0.653687	-0.557652	-0.644272	-0.410356	-3.56724e-17	9.58589	0.62067	1.745	2.005	3.125	1.445	4.755	-23.5281
-7	-1	-5	-3	5	Wt(-7,-1,-5,-3,5)	-0.653687	-0.557652	-0.644272	-0.410356	0	9.58589	0.572776	1.745	2.005	3.125	1.445	4.755	-23.5281
-7	-1	-5	-3	7	Wt(-7,-1,-5,-3,7)	-0.653687	-0.557652	-0.644272	-0.410356	0	9.58589	0.524699	1.745	2.005	3.125	1.445	4.755	-23.5281
-7	-1	-5	-3	9	Wt(-7,-1,-5,-3,9)	-0.653687	-0.557652	-0.644272	-0.410356	0	9.58589	0.479554	1.745	2.005	3.125	1.445	4.755	-23.5281
-7	-1	-5	-5	1	Wt(-7,-1,-5,-5,1)	-0.598557	-0.532493	-0.643254	-0.515613	0	10.5167	0.67029	1.785	2.035	3.15	1.345	4.755	-24.7251
-7	-1	-5	-5	3	Wt(-7,-1,-5,-5,3)	-0.598557	-0.532493	-0.643254	-0.515613	0	10.5167	0.63406	1.785	2.035	3.15	1.345	4.755	-24.7251
-7	-1	-5	-5	5	Wt(-7,-1,-5,-5,5)	-0.598557	-0.532493	-0.643254	-0.515613	6.503e-17	10.5167	0.59146	1.785	2.035	3.15	1.345	4.755	-24.7251
-7	-1	-5	-5	7	Wt(-7,-1,-5,-5,7)	-0.598557	-0.532493	-0.643254	-0.515613	3.2515e-17	10.5167	0.547226	1.785	2.035	3.15	1.345	4.755	-24.7251
-7	-1	-5	-5	9	Wt(-7,-1,-5,-5,9)	-0.598557	-0.532493	-0.643254	-0.515613	-3.2515e-17	10.5167	0.504447	1.785	2.035	3.15	1.345	4.755	-24.7251
-7	-1	-5	-7	1	Wt(-7,-1,-5,-7,1)	-0.543703	-0.503379	-0.632294	-0.594255	-2.94011e-17	11.6306	0.67673	1.8	2.03	3.175	1.305	4.755	-25.8281
-7	-1	-5	-7	3	Wt(-7,-1,-5,-7,3)	-0.543703	-0.503379	-0.632294	-0.594255	-2.94011e-17	11.6306	0.646335	1.8	2.03	3.175	1.305	4.755	-25.8281
-7	-1	-5	-7	5	Wt(-7,-1,-5,-7,5)	-0.543703	-0.503379	-0.632294	-0.594255	0	11.6306	0.609303	1.8	2.03	3.175	1.305	4.755	-25.8281
-7	-1	-5	-7	7	Wt(-7,-1,-5,-7,7)	-0.543703	-0.503379	-0.632294	-0.594255	2.94011e-17	11.6306	0.569524	1.8	2.03	3.175	1.305	4.755	-25.8281
-7	-1	-5	-7	9	Wt(-7,-1,-5,-7,9)	-0.543703	-0.503379	-0.632294	-0.594255	-2.94011e-17	11.6306	0.529846	1.8	2.03	3.175	1.305	4.755	-25.8281
-7	-1	-5	-9	1	Wt(-7,-1,-5,-9,1)	-0.493189	-0.474308	-0.616689	-0.652211	0	12.88	0.681969	1.795	2.135	3.2	1.28	4.755	-26.905
-7	-1	-5	-9	3	Wt(-7,-1,-5,-9,3)	-0.493189	-0.474308	-0.616689	-0.652211	-2.65491e-17	12.88	0.656739	1.795	2.135	3.2	1.28	4.755	-26.905
-7	-1	-5	-9	5	Wt(-7,-1,-5,-9,5)	-0.493189	-0.474308	-0.616689	-0.652211	-2.65491e-17	12.88	0.625001	1.795	2.135	3.2	1.28	4.755	-26.905
-7	-1	-5	-9	7	Wt(-7,-1,-5,-9,7)	-0.493189	-0.474308	-0.616689	-0.652211	0	12.88	0.589819	1.795	2.135	3.2	1.28	4.755	-26.905
-7	-1	-5	-9	9	Wt(-7,-1,-5,-9,9)	-0.493189	-0.474308	-0.616689	-0.652211	-2.65491e-17	12.88	0.553672	1.795	2.135	3.2	1.28	4.755	-26.905
-7	-1	-7	-1	1	Wt(-7,-1,-7,-1,1)	-0.649146	-0.558047	-0.688139	-0.296954	0	10.216	0.659465	1.725	1.665	3.02	1.96	4.835	-26.0207
-7	-1	-7	-1	3	Wt(-7,-1,-7,-1,3)	-0.649146	-0.558047	-0.688139	-0.296954	6.69443e-17	10.216	0.619267	1.725	1.665	3.02	1.96	4.835	-26.0207
-7	-1	-7	-1	5	Wt(-7,-1,-7,-1,5)	-0.649146	-0.558047	-0.688139	-0.296954	3.34722e-17	10.216	0.574298	1.725	1.665	3.02	1.96	4.835	-26.0207
-7	-1	-7	-1	7	Wt(-7,-1,-7,-1,7)	-0.649146	-0.558047	-0.688139	-0.296954	3.34722e-17	10.216	0.529073	1.725	1.665	3.02	1.96	4.835	-26.0207
-7	-1	-7	-1	9	Wt(-7,-1,-7,-1,9)	-0.649146	-0.558047	-0.688139	-0.296954	3.34722e-17	10.216	0.486268	1.725	1.665	3.02	1.96	4.835	-26.0207
-7	-1	-7	-3	1	Wt(-7,-1,-7,-3,1)	-0.609329	-0.544844	-0.697033	-0.413757	3.12837e-17	10.9307	0.665675	1.755	1.885	3.065	1.47	4.865	-27.4467
-7	-1	-7	-3	3	Wt(-7,-1,-7,-3,3)	-0.609329	-0.544844	-0.697033	-0.413757	-3.12837e-17	10.9307	0.629723	1.755	1.885	3.065	1.47	4.865	-27.4467
-7	-1	-7	-3	5	Wt(-7,-1,-7,-3,5)	-0.609329	-0.544844	-0.697033	-0.413757	3.12837e-17	10.9307	0.588416	1.755	1.885	3.065	1.47	4.865	-27.4467
-7	-1	-7	-3	7	Wt(-7,-1,-7,-3,7)	-0.609329	-0.544844	-0.697033	-0.413757	3.12837e-17	10.9307	0.545856	1.755	1.885	3.065	1.47	4.865	-27.4467
-7	-1	-7	-3	9	Wt(-7,-1,-7,-3,9)	-0.609329	-0.544844	-0.697033	-0.413757	0	10.9307	0.504719	1.755	1.885	3.065	1.47	4.865	-27.4467
-7	-1	-7	-5	1	Wt(-7,-1,-7,-5,1)	-0.564226	-0.523817	-0.692353	-0.50708	0	11.8553	0.671817	1.85	2.015	3.005	1.405	4.82	-28.6517
-7	-1	-7	-5	3	Wt(-7,-1,-7,-5,3)	-0.564226	-0.523817	-0.692353	-0.50708	0	11.8553	0.640529	1.85	2.015	3.005	1.405	4.82	-28.6517
-7	-1	-7	-5	5	Wt(-7,-1,-7,-5,5)	-0.564226	-0.523817	-0.692353	-0.50708	-2.88438e-17	11.8553	0.603532	1.85	2.015	3.005	1.405	4.82	-28.6517
-7	-1	-7	-5	7	Wt(-7,-1,-7,-5,7)	-0.564226	-0.523817	-0.692353	-0.50708	-2.88438e-17	11.8553	0.564369	1.85	2.015	3.005	1.405	4.82	-28.6517
-7	-1	-7	-5	9	Wt(-7,-1,-7,-5,9)	-0.564226	-0.523817	-0.692353	-0.50708	0	11.8553	0.525584	1.85	2.015	3.005	1.405	4.82	-28.6517
-7	-1	-7	-7	1	Wt(-7,-1,-7,-7,1)	-0.518948	-0.499384	-0.679573	-0.579417	-5.28316e-17	12.9449	0.677292	1.865	2.135	3.09	1.305	4.73	-29.7629
-7	-1	-7	-7	3	Wt(-7,-1,-7,-7,3)	-0.518948	-0.499384	-0.679573	-0.579417	-2.64158e-17	12.9449	0.650538	1.865	2.135	3.09	1.305	4.73	-29.7629
-7	-1	-7	-7	5	Wt(-7,-1,-7,-7,5)	-0.518948	-0.499384	-0.679573	-0.579417	-5.28316e-17	12.9449	0.618005	1.865	2.135	3.09	1.305	4.73	-29.7629
-7	-1	-7	-7	7	Wt(-7,-1,-7,-7,7)	-0.518948	-0.499384	-0.679573	-0.579417	-5.28316e-17	12.9449	0.582623	1.865	2.135	3.09	1.305	4.73	-29.7629
-7	-1	-7	-7	9	Wt(-7,-1,-7,-7,9)	-0.518948	-0.499384	-0.679573	-0.579417	0	12.9449	0.54669	1.865	2.135	3.09	1.305	4.73	-29.7629
-7	-1	-7	-9	1	Wt(-7,-1,-7,-9,1)	-0.47639	-0.474451	-0.66278	-0.634776	-2.41463e-17	14.1616	0.681887	1.895	2.02	3.09	1.28	4.76	-30.8335
-7	-1	-7	-9	3	Wt(-7,-1,-7,-9,3)	-0.47639	-0.474451	-0.66278	-0.634776	-2.41463e-17	14.1616	0.659226	1.895	2.02	3.09	1.28	4.76	-30.8335
-7	-1	-7	-9	5	Wt(-7,-1,-7,-9,5)	-0.47639	-0.474451	-0.66278	-0.634776	0	14.1616	0.630953	1.895	2.02	3.09	1.28	4.76	-30.8335
-7	-1	-7	-9	7	Wt(-7,-1,-7,-9,7)	-0.47639	-0.474451	-0.66278	-0.634776	-2.41463e-17	14.1616	0.599415	1.895	2.02	3.09	1.28	4.76	-30.8335
-7	-1	-7	-9	9	Wt(-7,-1,-7,-9,9)	-0.47639	-0.474451	-0.66278	-0.634776	2.41463e-17	14.1616	0.5666	1.895	2.02	3.09	1.28	4.76	-30.8335
-7	-1	-9	-1	1	Wt(-7,-1,-9,-1,1)	-0.603857	-0.542409	-0.728246	-0.311362	-5.87799e-17	11.635	0.663015	1.91	1.9	2.89	1.82	4.75	-29.8278
-7	-1	-9	-1	3	Wt(-7,-1,-9,-1,3)	-0.603857	-0.542409	-0.728246	-0.311362	0	11.635	0.628826	1.91	1.9	2.89	1.82	4.75	-29.8278
-7	-1	-9	-1	5	Wt(-7,-1,-9,-1,5)	-0.603857	-0.542409	-0.728246	-0.311362	-2.93899e-17	11.635	0.590016	1.91	1.9	2.89	1.82	4.75	-29.8278
-7	-1	-9	-1	7	Wt(-7,-1,-9,-1,7)	-0.603857	-0.542409	-0.728246	-0.311362	-5.87799e-17	11.635	0.550003	1.91	1.9	2.89	1.82	4.75	-29.8278
-7	-1	-9	-1	9	Wt(-7,-1,-9,-1,9)	-0.603857	-0.542409	-0.728246	-0.311362	-2.93899e-17	11.635	0.511079	1.91	1.9	2.89	1.82	4.75	-29.8278
-7	-1	-9	-3	1	Wt(-7,-1,-9,-3,1)	-0.570623	-0.531058	-0.73301	-0.413466	-5.53189e-17	12.3629	0.668218	1.85	2	2.96	1.485	4.84	-31.2446
-7	-1	-9	-3	3	Wt(-7,-1,-9,-3,3)	-0.570623	-0.531058	-0.73301	-0.413466	0	12.3629	0.637404	1.85	2	2.96	1.485	4.84	-31.2446
-7	-1	-9	-3	5	Wt(-7,-1,-9,-3,5)	-0.570623	-0.531058	-0.73301	-0.413466	-2.76595e-17	12.3629	0.601666	1.85	2	2.96	1.485	4.84	-31.2446
-7	-1	-9	-3	7	Wt(-7,-1,-9,-3,7)	-0.570623	-0.531058	-0.73301	-0.413466	-2.76595e-17	12.3629	0.564081	1.85	2	2.96	1.485	4.84	-31.2446
-7	-1	-9	-3	9	Wt(-7,-1,-9,-3,9)	-0.570623	-0.531058	-0.73301	-0.413466	-2.76595e-17	12.3629	0.526864	1.85	2	2.96	1.485	4.84	-31.2446
-7	-1	-9	-5	1	Wt(-7,-1,-9,-5,1)	-0.533518	-0.513683	-0.726933	-0.497162	5.15122e-17	13.2765	0.673348	1.875	1.945	2.97	1.405	4.87	-32.467
-7	-1	-9	-5	3	Wt(-7,-1,-9,-5,3)	-0.533518	-0.513683	-0.726933	-0.497162	2.57561e-17	13.2765	0.646167	1.875	1.945	2.97	1.405	4.87	-32.467
-7	-1	-9	-5	5	Wt(-7,-1,-9,-5,5)	-0.533518	-0.513683	-0.726933	-0.497162	0	13.2765	0.613918	1.875	1.945	2.97	1.405	4.87	-32.467
-7	-1	-9	-5	7	Wt(-7,-1,-9,-5,7)	-0.533518	-0.513683	-0.726933	-0.497162	5.15122e-17	13.2765	0.57926	1.875	1.945	2.97	1.405	4.87	-32.467
-7	-1	-9	-5	9	Wt(-7,-1,-9,-5,9)	-0.533518	-0.513683	-0.726933	-0.497162	2.57561e-17	13.2765	0.54425	1.875	1.945	2.97	1.405	4.87	-32.467
-7	-1	-9	-7	1	Wt(-7,-1,-9,-7,1)	-0.495939	-0.493322	-0.714079	-0.564109	-2.38454e-17	14.3404	0.678003	1.925	2.01	2.97	1.345	4.85	-33.616
-7	-1	-9	-7	3	Wt(-7,-1,-9,-7,3)	-0.495939	-0.493322	-0.714079	-0.564109	0	14.3404	0.654372	1.925	2.01	2.97	1.345	4.85	-33.616
-7	-1	-9	-7	5	Wt(-7,-1,-9,-7,5)	-0.495939	-0.493322	-0.714079	-0.564109	4.76908e-17	14.3404	0.625704	1.925	2.01	2.97	1.345	4.85	-33.616
-7	-1	-9	-7	7	Wt(-7,-1,-9,-7,7)	-0.495939	-0.493322	-0.714079	-0.564109	-2.38454e-17	14.3404	0.59422	1.925	2.01	2.97	1.345	4.85	-33.616
-7	-1	-9	-7	9	Wt(-7,-1,-9,-7,9)	-0.495939	-0.493322	-0.714079	-0.564109	-2.38454e-17	14.3404	0.561757	1.925	2.01	2.97	1.345	4.85	-33.616
-7	-1	-9	-9	1	Wt(-7,-1,-9,-9,1)	-0.459987	-0.472114	-0.697593	-0.617027	0	15.5236	0.682016	1.905	1.955	3.03	1.32	4.81	-34.7348
-7	-1	-9	-9	3	Wt(-7,-1,-9,-9,3)	-0.459987	-0.472114	-0.697593	-0.617027	0	15.5236	0.661645	1.905	1.955	3.03	1.32	4.81	-34.7348
[truncated: 1,139 more rows]

## Sheet: Table S5B-Corr
B) Pearson correlation coefficients based on all 3,125 economic weights
Trait	Parameter	EGG	BLUE	RS	Cor
Common bunt	EGG
	BLUE	0.9299
	RS	0.0035	-0.0109
	CGM	-0.1462	-0.1356	0.4465
	Index	-0.162	-0.1382	-0.9398	-0.3685
Leaf rust	EGG
	BLUE	0.8307
	RS	-0.1737	-0.1898
	CGM	0.0058	-0.0589	0.4465
	Index	0.1428	0.0905	-0.9398	-0.3685
Leaf spot	EGG
	BLUE	0.7767
	RS	-0.1571	-0.0911
	CGM	-0.0663	0.0204	0.4465
	Index	0.3251	0.3231	-0.9598	-0.3685
Stripe rust	EGG
	BLUE	0.8286
	RS	-0.0715	-0.072
	CGM	0.1183	0.1096	0.4465
	Index	0.2126	0.2864	-0.9598	-0.3685
	EGG: Expected genetic gain
	BLUE: best linear unbiased estimator
	RS: Response to selection
	CGM: correlation between the index and the net genetic merit
	Index: Kempthorne and Nordskog Restrictive Linear Phenotypic Selection Index

## Sheet: Table S5C-ANOVA
C) Oneway analyses of varaince comparing statistical differences among 5 economic weights per trait.
			Analysis of variance					Comparisons of means using Tukey-Kramer HSD
Trait	Parameter	Source	DF	Sum of Squares	Mean Square	F Ratio	Prob > F	Weights	Mean	Significant
Stripe rust (Yr)	EGG	Yr weights	4	31.0239	7.75598	1420.07	<.0001	Yr=-1	-0.363044	A
		Error	3120	17.0405	0.00546			Yr=-3	-0.466505	B
		Total	3124	48.0644				Yr=-5	-0.543169	C
								Yr=-7	-0.600291	D
								Yr=-9	-0.643335	E
	RS	Yr weights	4	7116.25	1779.06	213.038	<.0001	Yr=-9	14.5425	A
		Error	3120	26054.8	8.35			Yr=-7	13.2969	B
		Total	3124	33171.1				Yr=-5	12.1507	C
								Yr=-3	11.1372	D
								Yr=-1	10.3025	E
	Index	Yr weights	4	64615.8	16153.9	362.911	<.0001	Yr=-1	-19.42	A
		Error	3120	138878	44.5			Yr=-3	-22.8404	B
		Total	3124	203494				Yr=-5	-26.0749	C
								Yr=-7	-29.2189	D
								Yr=-9	-32.3042	E
	CGM	Yr weights	4	0.157107	0.039277	9.1381	<.0001	Yr=-9	0.613496	A
		Error	3120	13.4101	0.004298			Yr=-7	0.608105	AB
		Total	3124	13.5672				Yr=-5	0.60253	BC
								Yr=-3	0.597351	C
								Yr=-1	0.593887	C
	Yr score	Yr weights	4	103.983	25.9956	2028.86	<.0001	Yr=-1	2.314	A
		Error	3120	39.9763	0.0128			Yr=-3	2.06656	B
		Total	3124	143.959				Yr=-5	1.92872	C
								Yr=-7	1.8538	D
								Yr=-9	1.80748	E
	Yield	Yr weights	4	0.600776	0.150194	84.3057	<.0001	Yr=-7	4.8066	A
		Error	3120	5.5584	0.001782			Yr=-9	4.8038	AB
		Total	3124	6.15918				Yr=-5	4.79796	B
								Yr=-3	4.78636	C
Leaf rust (Lr)	EGG	Lr weights	4	20.2923	5.07308	1572.57	<.0001	Lr=-1	-0.493387	A
		Error	3120	10.065	0.00323			Lr=-3	-0.582316	B
		Total	3124	30.3574				Lr=-5	-0.643971	C
								Lr=-7	-0.687875	D
								Lr=-9	-0.71993	E
	RS	Lr weights	4	10065.3	2516.33	339.783	<.0001	Lr=-9	14.9223	A
		Error	3120	23105.7	7.41			Lr=-7	13.5129	B
		Total	3124	33171.1				Lr=-5	12.1786	C
								Lr=-3	10.9488	D
								Lr=-1	9.86744	E
	Index	Lr weights	4	30680.4	7670.09	138.477	<.0001	Lr=-1	-21.3807	A
		Error	3120	172813	55.39			Lr=-3	-23.8746	B
		Total	3124	203494				Lr=-5	-26.1043	C
								Lr=-7	-28.2224	D
								Lr=-9	-30.2764	E
	CGM	Lr weights	4	0.780137	0.195034	47.5876	<.0001	Lr=-9	0.623974	A
		Error	3120	12.7871	0.004098			Lr=-7	0.615007	A
		Total	3124	13.5672				Lr=-5	0.604451	B
								Lr=-3	0.59237	C
								Lr=-1	0.579568	D
	Lr score	Lr weights	4	215.316	53.8289	3473.45	<.0001	Lr=-1	1.99316	A
		Error	3120	48.3513	0.0155			Lr=-3	1.56372	B
		Total	3124	263.667				Lr=-5	1.40496	C
								Lr=-7	1.31268	D
								Lr=-9	1.26872	E
	Yield	Lr weights	4	0.824726	0.206182	120.591	<.0001	Lr=-7	4.80744	A
		Error	3120	5.33445	0.00171			Lr=-9	4.8062	A
		Total	3124	6.15918				Lr=-5	4.80132	A
								Lr=-3	4.78324	B
								Lr=-1	4.7652	C
Leaf spot (Ls)	EGG	Ls weights	4	21.2387	5.30967	2617.41	<.0001	Ls=-1	-0.478914	A
		Error	3120	6.32921	0.00203			Ls=-3	-0.569562	B
		Total	3124	27.5679				Ls=-5	-0.632655	C
								Ls=-7	-0.677717	D
								Ls=-9	-0.710701	E
	RS	Ls weights	4	9706.38	2426.6	322.654	<.0001	Ls=-9	14.8789	A
		Error	3120	23464.7	7.52			Ls=-7	13.4888	B
		Total	3124	33171.1				Ls=-5	12.176	C
								Ls=-3	10.9702	D
								Ls=-1	9.91604	E
	Index	Ls weights	4	98191.7	24547.9	727.333	<.0001	Ls=-1	-17.9905	A
		Error	3120	105302	33.8			Ls=-3	-22.0401	B
		Total	3124	203494				Ls=-5	-26.0215	C
								Ls=-7	-29.956	D
								Ls=-9	-33.8503	E
	CGM	Ls weights	4	0.632496	0.158124	38.1412	<.0001	Ls=-9	0.622111	A
		Error	3120	12.9347	0.004146			Ls=-7	0.613769	AB
		Total	3124	13.5672				Ls=-5	0.60409	B
								Ls=-3	0.593241	C
	Ls score	Ls weights	4	21.5965	5.39912	912.938	<.0001	Ls=-1	3.29188	A
		Error	3120	18.4517	0.00591			Ls=-3	3.18828	B
		Total	3124	40.0482				Ls=-5	3.13324	C
								Ls=-7	3.09228	D
								Ls=-9	3.05324	E
	Yield	Ls weights	4	0.014758	0.00369	1.8734	0.1123	Ls=-7	4.79452	A
		Error	3120	6.14442	0.001969			Ls=-5	4.79404	A
		Total	3124	6.15918				Ls=-3	4.79384	A
								Ls=-9	4.79244	A
								Ls=-1	4.78856	A
Common bunt (Cb)	EGG	Cb weights	4	46.2826	11.5706	1905.2	<.0001	Cb=-1	-0.286307	A
		Error	3120	18.9484	0.0061			Cb=-3	-0.409732	B
		Total	3124	65.231				Cb=-5	-0.503648	C
								Cb=-7	-0.574659	D
								Cb=-9	-0.628592	E
	RS	Cb weights	4	6079.5	1519.88	175.036	<.0001	Cb=-9	14.4069	A
		Error	3120	27091.6	8.68			Cb=-7	13.2012	B
		Total	3124	33171.1				Cb=-5	12.1196	C
								Cb=-3	11.2019	D
								Cb=-1	10.5004	E
	Index	Cb weights	4	9892.64	2473.16	39.8565	<.0001	Cb=-1	-23.3161	A
		Error	3120	193601	62.05			Cb=-3	-24.8088	B
		Total	3124	203494				Cb=-5	-26.1015	C
								Cb=-7	-27.2664	CD
								Cb=-9	-28.3656	D
	CGM	Cb weights	4	1.36218	0.340546	87.0543	<.0001	Cb=-9	0.6315	A
		Error	3120	12.2051	0.003912			Cb=-7	0.618703	B
		Total	3124	13.5672				Cb=-5	0.604013	C
								Cb=-3	0.588131	D
								Cb=-1	0.573023	E
	Cb score	Cb weights	4	140.98	35.2451	2244.07	<.0001	Cb=-1	1.8818	A
		Error	3120	49.0022	0.0157			Cb=-3	1.59068	B
		Total	3124	189.982				Cb=-5	1.438	C
								Cb=-7	1.33948	D
								Cb=-9	1.2942	E
	Yield	Cb weights	4	0.600328	0.150082	84.2361	<.0001	Cb=-3	4.80908	A
		Error	3120	5.55885	0.001782			Cb=-1	4.80796	A
		Total	3124	6.15918				Cb=-5	4.78964	B
								Cb=-7	4.78276	C
								Cb=-9	4.77396	D
Grain yield (Yld)	EGG.Yr	Yield weights	4	1.5407e-29	3.85e-30	0	1	Yld=9	-0.523269	A
		Error	3120	48.0644	0.015405			Yld=3	-0.523269	A
		C. Total	3124	48.0644				Yld=5	-0.523269	A
								Yld=7	-0.523269	A
								Yld=1	-0.523269	A
	EGG.Lr	Yield weights	4	0	0	0	1	Yld=1	-0.625496	A
		Error	3120	30.3574	0.00973			Yld=3	-0.625496	A
		C. Total	3124	30.3574				Yld=5	-0.625496	A
								Yld=7	-0.625496	A
								Yld=9	-0.625496	A
	EGG.Ls	Yield weights	4	2.3111e-29	5.78e-30	0	1	Yld=3	-0.61391	A
		Error	3120	27.5679	0.008836			Yld=5	-0.61391	A
		C. Total	3124	27.5679				Yld=7	-0.61391	A
								Yld=1	-0.61391	A
								Yld=9	-0.61391	A
	EGG.Cb	Yield weights	4	3.8519e-30	9.63e-31	0	1	Yld=1	-0.480587	A
		Error	3120	65.231	0.020907			Yld=5	-0.480587	A
		C. Total	3124	65.231				Yld=7	-0.480587	A
								Yld=3	-0.480587	A
								Yld=9	-0.480587	A
	RS	Yield weights	4	0	0	0	1	Yld=1	12.286	A
		Error	3120	33171.1	10.6317			Yld=3	12.286	A
		C. Total	3124	33171.1				Yld=5	12.286	A
								Yld=7	12.286	A
								Yld=9	12.286	A
	CGM	Yield weights	4	8.8184	2.2046	1448.43	<.0001*	Yld=1	0.675378	A
		Error	3120	4.74884	0.00152			Yld=3	0.643124	B
		C. Total	3124	13.5672				Yld=5	0.604967	C
								Yld=7	0.565283	D
								Yld=9	0.526617	E
	EGG: Expected genetic gain
	BLUE: best linear unbiased estimator
	RS: Response to selection
	CGM: correlation between the index and the net genetic merit
	Index: Kempthorne and Nordskog Restrictive Linear Phenotypic Selection Index
	DS: Disease score
	Yr: Stripe rust
	Lr: Leaf rust
	CLs: Leaf spot
	Cb: Common bunt
	Yld: Grain yield
Fit Group
Oneway Analysis of EGG.Yr By Yld wt.
Oneway Anova
Summary of Fit
Rsquare	0
Adj Rsquare	-0.00128
Root Mean Square Error	0.124118
Mean of Response	-0.52327
Observations (or Sum Wgts)	3125
Analysis of Variance
Source	DF	Sum of Squares	Mean Square	F Ratio	Prob > F
Yld wt.	4	1.5407e-29	3.85e-30	0	1
Error	3120	48.0644	0.015405
C. Total	3124	48.0644
Means for Oneway Anova
Level	Number	Mean	Std Error	Lower 95%	Upper 95%
Yld=1	625	-0.52327	0.00496	-0.533	-0.5135
Yld=3	625	-0.52327	0.00496	-0.533	-0.5135
Yld=5	625	-0.52327	0.00496	-0.533	-0.5135
Yld=7	625	-0.52327	0.00496	-0.533	-0.5135
Yld=9	625	-0.52327	0.00496	-0.533	-0.5135
Std Error uses a pooled estimate of error variance
Means Comparisons
Comparisons for all pairs using Tukey-Kramer HSD
Connecting Letters Report
Level		Mean
Yld=9	A	-0.523269
Yld=3	A	-0.523269
Yld=5	A	-0.523269
Yld=7	A	-0.523269
Yld=1	A	-0.523269
Levels not connected by same letter are significantly different.
Ordered Differences Report
Level	- Level	Difference	Std Err Dif	Lower CL	Upper CL	p-Value
Yld=9	Yld=1	2.22e-16	0.0070212	-0.019164	0.0191637	1
Yld=9	Yld=3	1.11e-16	0.0070212	-0.019164	0.0191637	1
Yld=9	Yld=5	1.11e-16	0.0070212	-0.019164	0.0191637	1
Yld=9	Yld=7	1.11e-16	0.0070212	-0.019164	0.0191637	1
Yld=3	Yld=1	1.11e-16	0.0070212	-0.019164	0.0191637	1
Yld=5	Yld=1	1.11e-16	0.0070212	-0.019164	0.0191637	1
Yld=7	Yld=1	1.11e-16	0.0070212	-0.019164	0.0191637	1
Yld=5	Yld=3	0	0.0070212	-0.019164	0.0191637	1
Yld=7	Yld=3	0	0.0070212	-0.019164	0.0191637	1
Yld=7	Yld=5	0	0.0070212	-0.019164	0.0191637	1
Oneway Analysis of EGG.Lr By Yld wt.
Oneway Anova
Summary of Fit
Rsquare	0
Adj Rsquare	-0.00128
Root Mean Square Error	0.09864
Mean of Response	-0.6255
Observations (or Sum Wgts)	3125
Analysis of Variance
Source	DF	Sum of Squares	Mean Square	F Ratio	Prob > F
Yld wt.	4	0	0	0	1
Error	3120	30.3574	0.00973
C. Total	3124	30.3574
Means for Oneway Anova
Level	Number	Mean	Std Error	Lower 95%	Upper 95%
Yld=1	625	-0.6255	0.00395	-0.6332	-0.6178
Yld=3	625	-0.6255	0.00395	-0.6332	-0.6178
Yld=5	625	-0.6255	0.00395	-0.6332	-0.6178
Yld=7	625	-0.6255	0.00395	-0.6332	-0.6178
Yld=9	625	-0.6255	0.00395	-0.6332	-0.6178
Std Error uses a pooled estimate of error variance
Means Comparisons
Comparisons for all pairs using Tukey-Kramer HSD
Connecting Letters Report
Level		Mean
Yld=1	A	-0.625496
Yld=3	A	-0.625496
Yld=5	A	-0.625496
Yld=7	A	-0.625496
Yld=9	A	-0.625496
Levels not connected by same letter are significantly different.
Ordered Differences Report
Level	- Level	Difference	Std Err Dif	Lower CL	Upper CL	p-Value
Yld=3	Yld=1	0	0.0055799	-0.01523	0.01523	1
Yld=5	Yld=1	0	0.0055799	-0.01523	0.01523	1
Yld=5	Yld=3	0	0.0055799	-0.01523	0.01523	1
Yld=7	Yld=1	0	0.0055799	-0.01523	0.01523	1
Yld=7	Yld=3	0	0.0055799	-0.01523	0.01523	1
Yld=7	Yld=5	0	0.0055799	-0.01523	0.01523	1
Yld=9	Yld=1	0	0.0055799	-0.01523	0.01523	1
Yld=9	Yld=3	0	0.0055799	-0.01523	0.01523	1
Yld=9	Yld=5	0	0.0055799	-0.01523	0.01523	1
Yld=9	Yld=7	0	0.0055799	-0.01523	0.01523	1
Oneway Analysis of EGG.Ls By Yld wt.
Oneway Anova
Summary of Fit
Rsquare	-2.2e-16
Adj Rsquare	-0.00128
Root Mean Square Error	0.093999
Mean of Response	-0.61391
Observations (or Sum Wgts)	3125
Analysis of Variance
Source	DF	Sum of Squares	Mean Square	F Ratio	Prob > F
Yld wt.	4	2.3111e-29	5.78e-30	0	1
Error	3120	27.5679	0.008836
C. Total	3124	27.5679
Means for Oneway Anova
Level	Number	Mean	Std Error	Lower 95%	Upper 95%
Yld=1	625	-0.61391	0.00376	-0.6213	-0.6065
Yld=3	625	-0.61391	0.00376	-0.6213	-0.6065
Yld=5	625	-0.61391	0.00376	-0.6213	-0.6065
Yld=7	625	-0.61391	0.00376	-0.6213	-0.6065
Yld=9	625	-0.61391	0.00376	-0.6213	-0.6065
Std Error uses a pooled estimate of error variance
Means Comparisons
Comparisons for all pairs using Tukey-Kramer HSD
Connecting Letters Report
Level		Mean
Yld=3	A	-0.61391
Yld=5	A	-0.61391
Yld=7	A	-0.61391
Yld=1	A	-0.61391
Yld=9	A	-0.61391
Levels not connected by same letter are significantly different.
Ordered Differences Report
Level	- Level	Difference	Std Err Dif	Lower CL	Upper CL	p-Value
Yld=3	Yld=1	1.11e-16	0.0053174	-0.014513	0.0145134	1
Yld=5	Yld=1	1.11e-16	0.0053174	-0.014513	0.0145134	1
Yld=7	Yld=1	1.11e-16	0.0053174	-0.014513	0.0145134	1
Yld=3	Yld=9	1.11e-16	0.0053174	-0.014513	0.0145134	1
Yld=5	Yld=9	1.11e-16	0.0053174	-0.014513	0.0145134	1
Yld=7	Yld=9	1.11e-16	0.0053174	-0.014513	0.0145134	1
Yld=5	Yld=3	0	0.0053174	-0.014513	0.0145134	1
Yld=7	Yld=3	0	0.0053174	-0.014513	0.0145134	1
Yld=7	Yld=5	0	0.0053174	-0.014513	0.0145134	1
Yld=9	Yld=1	0	0.0053174	-0.014513	0.0145134	1
Oneway Analysis of EGG.Cb By Yld wt.
Oneway Anova
Summary of Fit
Rsquare	0
Adj Rsquare	-0.00128
Root Mean Square Error	0.144594
Mean of Response	-0.48059
Observations (or Sum Wgts)	3125
Analysis of Variance
Source	DF	Sum of Squares	Mean Square	F Ratio	Prob > F
Yld wt.	4	3.8519e-30	9.63e-31	0	1
Error	3120	65.231	0.020907
C. Total	3124	65.231
Means for Oneway Anova
Level	Number	Mean	Std Error	Lower 95%	Upper 95%
Yld=1	625	-0.48059	0.00578	-0.4919	-0.4692
Yld=3	625	-0.48059	0.00578	-0.4919	-0.4692
Yld=5	625	-0.48059	0.00578	-0.4919	-0.4692
Yld=7	625	-0.48059	0.00578	-0.4919	-0.4692
Yld=9	625	-0.48059	0.00578	-0.4919	-0.4692
Std Error uses a pooled estimate of error variance
Means Comparisons
Comparisons for all pairs using Tukey-Kramer HSD
Connecting Letters Report
Level		Mean
Yld=1	A	-0.480587
Yld=5	A	-0.480587
Yld=7	A	-0.480587
Yld=3	A	-0.480587
Yld=9	A	-0.480587
Levels not connected by same letter are significantly different.
Ordered Differences Report
Level	- Level	Difference	Std Err Dif	Lower CL	Upper CL	p-Value
Yld=1	Yld=3	5.551e-17	0.0081795	-0.022325	0.0223252	1
Yld=5	Yld=3	5.551e-17	0.0081795	-0.022325	0.0223252	1
Yld=7	Yld=3	5.551e-17	0.0081795	-0.022325	0.0223252	1
Yld=1	Yld=9	5.551e-17	0.0081795	-0.022325	0.0223252	1
Yld=5	Yld=9	5.551e-17	0.0081795	-0.022325	0.0223252	1
Yld=7	Yld=9	5.551e-17	0.0081795	-0.022325	0.0223252	1
Yld=5	Yld=1	0	0.0081795	-0.022325	0.0223252	1
Yld=7	Yld=1	0	0.0081795	-0.022325	0.0223252	1
Yld=7	Yld=5	0	0.0081795	-0.022325	0.0223252	1
Yld=9	Yld=3	0	0.0081795	-0.022325	0.0223252	1
Oneway Analysis of EGG.Con_Yield By Yld wt.
Oneway Anova
Summary of Fit
Rsquare	0.003837
Adj Rsquare	0.00256
Root Mean Square Error	2.81e-17
Mean of Response	-1.1e-17
Observations (or Sum Wgts)	3125
Analysis of Variance
Source	DF	Sum of Squares	Mean Square	F Ratio	Prob > F
Yld wt.	4	9.5223e-33	2.381e-33	3.0044	0.0174
Error	3120	2.4722e-30	7.924e-34
C. Total	3124	2.4817e-30
Means for Oneway Anova
Level	Number	Mean	Std Error	Lower 95%	Upper 95%
Yld=1	625	-8.71e-18	1.126e-18	-1.09e-17	-6.5e-18
Yld=3	625	-9.11e-18	1.126e-18	-1.13e-17	-6.9e-18
Yld=5	625	-1.13e-17	1.126e-18	-1.35e-17	-9.05e-18
Yld=7	625	-1.22e-17	1.126e-18	-1.44e-17	-1e-17
Yld=9	625	-1.32e-17	1.126e-18	-1.54e-17	-1.1e-17
Std Error uses a pooled estimate of error variance
Means Comparisons
Comparisons for all pairs using Tukey-Kramer HSD
Connecting Letters Report
Level			Mean
Yld=1	A		-8.713e-18
Yld=3	A	B	-9.107e-18
Yld=5	A	B	-1.126e-17
Yld=7	A	B	-1.222e-17
Yld=9		B	-1.322e-17
Levels not connected by same letter are significantly different.
Ordered Differences Report
Level	- Level	Difference	Std Err Dif	Lower CL	Upper CL	p-Value
Yld=1	Yld=9	4.507e-18	1.592e-18	1.603e-19	8.853e-18	0.0377	+++++++
Yld=3	Yld=9	4.112e-18	1.592e-18	-2.34e-19	8.458e-18	0.0739	++++++
Yld=1	Yld=7	3.503e-18	1.592e-18	-8.43e-19	7.85e-18	0.1798	+++++
Yld=3	Yld=7	3.109e-18	1.592e-18	-1.24e-18	7.455e-18	0.29	+++++
Yld=1	Yld=5	2.544e-18	1.592e-18	-1.8e-18	6.89e-18	0.4989	++++
Yld=3	Yld=5	2.149e-18	1.592e-18	-2.2e-18	6.496e-18	0.6599	+++
Yld=5	Yld=9	1.962e-18	1.592e-18	-2.38e-18	6.309e-18	0.7324	+++
Yld=7	Yld=9	1.003e-18	1.592e-18	-3.34e-18	5.349e-18	0.9703	++
Yld=5	Yld=7	9.594e-19	1.592e-18	-3.39e-18	5.306e-18	0.9747	+
Yld=1	Yld=3	3.948e-19	1.592e-18	-3.95e-18	4.741e-18	0.9992	+
Oneway Analysis of RS By Yld wt.
Oneway Anova
Summary of Fit
Rsquare	0
Adj Rsquare	-0.00128
Root Mean Square Error	3.26064
Mean of Response	12.286
Observations (or Sum Wgts)	3125
Analysis of Variance
Source	DF	Sum of Squares	Mean Square	F Ratio	Prob > F
Yld wt.	4	0	0	0	1
Error	3120	33171.1	10.6317
C. Total	3124	33171.1
Means for Oneway Anova
Level	Number	Mean	Std Error	Lower 95%	Upper 95%
Yld=1	625	12.286	0.13043	12.03	12.542
Yld=3	625	12.286	0.13043	12.03	12.542
Yld=5	625	12.286	0.13043	12.03	12.542
Yld=7	625	12.286	0.13043	12.03	12.542
Yld=9	625	12.286	0.13043	12.03	12.542
Std Error uses a pooled estimate of error variance
Means Comparisons
Comparisons for all pairs using Tukey-Kramer HSD
Connecting Letters Report
Level		Mean
Yld=1	A	12.286
Yld=3	A	12.286
Yld=5	A	12.286
Yld=7	A	12.286
Yld=9	A	12.286
Levels not connected by same letter are significantly different.
Ordered Differences Report
Level	- Level	Difference	Std Err Dif	Lower CL	Upper CL	p-Value
Yld=3	Yld=1	0	0.184449	-0.503441	0.503441	1
Yld=5	Yld=1	0	0.184449	-0.503441	0.503441	1
Yld=5	Yld=3	0	0.184449	-0.503441	0.503441	1
Yld=7	Yld=1	0	0.184449	-0.503441	0.503441	1
Yld=7	Yld=3	0	0.184449	-0.503441	0.503441	1
Yld=7	Yld=5	0	0.184449	-0.503441	0.503441	1
Yld=9	Yld=1	0	0.184449	-0.503441	0.503441	1
Yld=9	Yld=3	0	0.184449	-0.503441	0.503441	1
Yld=9	Yld=5	0	0.184449	-0.503441	0.503441	1
Yld=9	Yld=7	0	0.184449	-0.503441	0.503441	1
Oneway Analysis of Cor By Yld wt.
Oneway Anova
Summary of Fit
Rsquare	0.649977
Adj Rsquare	0.649529
Root Mean Square Error	0.039014
Mean of Response	0.603074
Observations (or Sum Wgts)	3125
Analysis of Variance
Source	DF	Sum of Squares	Mean Square	F Ratio	Prob > F
Yld wt.	4	8.8184	2.2046	1448.43	<.0001
Error	3120	4.74884	0.00152
C. Total	3124	13.5672
Means for Oneway Anova
Level	Number	Mean	Std Error	Lower 95%	Upper 95%
Yld=1	625	0.675378	0.00156	0.67232	0.67844
Yld=3	625	0.643124	0.00156	0.64006	0.64618
Yld=5	625	0.604967	0.00156	0.60191	0.60803
Yld=7	625	0.565283	0.00156	0.56222	0.56834
Yld=9	625	0.526617	0.00156	0.52356	0.52968
Std Error uses a pooled estimate of error variance
Means Comparisons
Comparisons for all pairs using Tukey-Kramer HSD
Connecting Letters Report
Level						Mean
Yld=1	A					0.675378
Yld=3		B				0.643124
Yld=5			C			0.604967
Yld=7				D		0.565283
Yld=9					E	0.526617
Levels not connected by same letter are significantly different.
Ordered Differences Report
Level	- Level	Difference	Std Err Dif	Lower CL	Upper CL	p-Value
Yld=1	Yld=9	0.148762	0.0022069	0.142738	0.154786	<.0001	+++++++++++++++++++
Yld=3	Yld=9	0.116507	0.0022069	0.110484	0.122531	<.0001	+++++++++++++++
Yld=1	Yld=7	0.110096	0.0022069	0.104072	0.116119	<.0001	++++++++++++++
Yld=5	Yld=9	0.0783507	0.0022069	0.072327	0.0843744	<.0001	++++++++++
Yld=3	Yld=7	0.0778412	0.0022069	0.0718175	0.0838649	<.0001	++++++++++
Yld=1	Yld=5	0.0704111	0.0022069	0.0643875	0.0764348	<.0001	+++++++++
Yld=5	Yld=7	0.0396845	0.0022069	0.0336608	0.0457082	<.0001	+++++
Yld=7	Yld=9	0.0386662	0.0022069	0.0326425	0.0446899	<.0001	+++++
Yld=3	Yld=5	0.0381567	0.0022069	0.032133	0.0441804	<.0001	+++++
Yld=1	Yld=3	0.0322544	0.0022069	0.0262307	0.0382781	<.0001	++++

## Sheet: Table S5D Selected 4 wts
D) The 20 top economic weights and the four best weights used for selecting cultivars and lines to serve as parents in new crosses
Yr weights	Lr weights	Ls weights	Cb weights	Yld weights	Economic weights for all 5 traits	EGG.Yr	EGG.Lr	EGG.Ls	EGG.Cb	EGG.Con_Yield	RS	CGM	DS.Yr	DS.Lr	DS.Ls	DS.Cb	Yield	Index	Selected weights	Comment
-7	-9	-9	-9	1	Wt(-7,-9,-9,-9,1)	-0.508811	-0.653958	-0.659428	-0.526618	0	20.1217	0.682016	1.98	1.385	3.165	1.42	4.805	-44.3299	Yes (final)	RLPSI < -44; RS > 19; CGM > 0.60; EGG for Yr, Lr and Cb < -0.50
-7	-9	-9	-9	3	Wt(-7,-9,-9,-9,3)	-0.508811	-0.653958	-0.659428	-0.526618	0	20.1217	0.666727	1.98	1.385	3.165	1.42	4.805	-44.3299	Yes (top 20 weight)	RLPSI < -44; RS > 19; CGM > 0.60; EGG for Yr, Lr and Cb < -0.50
-7	-9	-9	-9	5	Wt(-7,-9,-9,-9,5)	-0.508811	-0.653958	-0.659428	-0.526618	0	20.1217	0.648305	1.98	1.385	3.165	1.42	4.805	-44.3299	Yes (top 20 weight)	RLPSI < -44; RS > 19; CGM > 0.60; EGG for Yr, Lr and Cb < -0.50
-7	-9	-9	-9	7	Wt(-7,-9,-9,-9,7)	-0.508811	-0.653958	-0.659428	-0.526618	-3.39883e-17	20.1217	0.627597	1.98	1.385	3.165	1.42	4.805	-44.3299	Yes (top 20 weight)	RLPSI < -44; RS > 19; CGM > 0.60; EGG for Yr, Lr and Cb < -0.50
-7	-9	-9	-9	9	Wt(-7,-9,-9,-9,9)	-0.508811	-0.653958	-0.659428	-0.526618	0	20.1217	0.605405	1.98	1.385	3.165	1.42	4.805	-44.3299	Yes (top 20 weight)	RLPSI < -44; RS > 19; CGM > 0.60; EGG for Yr, Lr and Cb < -0.50
-9	-7	-9	-9	1	Wt(-9,-7,-9,-9,1)	-0.545359	-0.627092	-0.656117	-0.521283	0	19.8945	0.680079	1.84	1.455	3.145	1.48	4.84	-45.2978	Yes (final)	RLPSI < -44; RS > 19; CGM > 0.60; EGG for Yr, Lr and Cb < -0.50
-9	-7	-9	-9	3	Wt(-9,-7,-9,-9,3)	-0.545359	-0.627092	-0.656117	-0.521283	3.43765e-17	19.8945	0.664104	1.84	1.455	3.145	1.48	4.84	-45.2978	Yes (top 20 weight)	RLPSI < -44; RS > 19; CGM > 0.60; EGG for Yr, Lr and Cb < -0.50
-9	-7	-9	-9	5	Wt(-9,-7,-9,-9,5)	-0.545359	-0.627092	-0.656117	-0.521283	3.43765e-17	19.8945	0.645054	1.84	1.455	3.145	1.48	4.84	-45.2978	Yes (top 20 weight)	RLPSI < -44; RS > 19; CGM > 0.60; EGG for Yr, Lr and Cb < -0.50
-9	-7	-9	-9	7	Wt(-9,-7,-9,-9,7)	-0.545359	-0.627092	-0.656117	-0.521283	3.43765e-17	19.8945	0.623804	1.84	1.455	3.145	1.48	4.84	-45.2978	Yes (top 20 weight)	RLPSI < -44; RS > 19; CGM > 0.60; EGG for Yr, Lr and Cb < -0.50
-9	-7	-9	-9	9	Wt(-9,-7,-9,-9,9)	-0.545359	-0.627092	-0.656117	-0.521283	3.43765e-17	19.8945	0.601171	1.84	1.455	3.145	1.48	4.84	-45.2978	Yes (top 20 weight)	RLPSI < -44; RS > 19; CGM > 0.60; EGG for Yr, Lr and Cb < -0.50
-9	-9	-7	-9	1	Wt(-9,-9,-7,-9,1)	-0.56372	-0.668806	-0.613422	-0.5038	-6.86619e-17	19.9209	0.680461	1.905	1.435	3.175	1.42	4.815	-43.5235	Yes (final)	RLPSI < -44; RS > 19; CGM > 0.60; EGG for Yr, Lr and Cb < -0.50
-9	-9	-7	-9	3	Wt(-9,-9,-7,-9,3)	-0.56372	-0.668806	-0.613422	-0.5038	-3.43309e-17	19.9209	0.664587	1.905	1.435	3.175	1.42	4.815	-43.5235	Yes (top 20 weight)	RLPSI < -44; RS > 19; CGM > 0.60; EGG for Yr, Lr and Cb < -0.50
-9	-9	-7	-9	5	Wt(-9,-9,-7,-9,5)	-0.56372	-0.668806	-0.613422	-0.5038	-3.43309e-17	19.9209	0.645625	1.905	1.435	3.175	1.42	4.815	-43.5235	Yes (top 20 weight)	RLPSI < -44; RS > 19; CGM > 0.60; EGG for Yr, Lr and Cb < -0.50
-9	-9	-7	-9	7	Wt(-9,-9,-7,-9,7)	-0.56372	-0.668806	-0.613422	-0.5038	-3.43309e-17	19.9209	0.624446	1.905	1.435	3.175	1.42	4.815	-43.5235	Yes (top 20 weight)	RLPSI < -44; RS > 19; CGM > 0.60; EGG for Yr, Lr and Cb < -0.50
-9	-9	-7	-9	9	Wt(-9,-9,-7,-9,9)	-0.56372	-0.668806	-0.613422	-0.5038	-6.86619e-17	19.9209	0.601866	1.905	1.435	3.175	1.42	4.815	-43.5235	Yes (top 20 weight)	RLPSI < -44; RS > 19; CGM > 0.60; EGG for Yr, Lr and Cb < -0.50
-9	-9	-9	-9	1	Wt(-9,-9,-9,-9,1)	-0.54881	-0.657833	-0.645079	-0.501651	-3.22895e-17	21.1804	0.680451	1.915	1.35	3.16	1.495	4.84	-47.5185	Yes (final)	RLPSI < -44; RS > 19; CGM > 0.60; EGG for Yr, Lr and Cb < -0.50
-9	-9	-9	-9	3	Wt(-9,-9,-9,-9,3)	-0.54881	-0.657833	-0.645079	-0.501651	0	21.1804	0.665619	1.915	1.35	3.16	1.495	4.84	-47.5185	Yes (top 20 weight)	RLPSI < -44; RS > 19; CGM > 0.60; EGG for Yr, Lr and Cb < -0.50
-9	-9	-9	-9	5	Wt(-9,-9,-9,-9,5)	-0.54881	-0.657833	-0.645079	-0.501651	-3.22895e-17	21.1804	0.648008	1.915	1.35	3.16	1.495	4.84	-47.5185	Yes (top 20 weight)	RLPSI < -44; RS > 19; CGM > 0.60; EGG for Yr, Lr and Cb < -0.50
-9	-9	-9	-9	7	Wt(-9,-9,-9,-9,7)	-0.54881	-0.657833	-0.645079	-0.501651	3.22895e-17	21.1804	0.628347	1.915	1.35	3.16	1.495	4.84	-47.5185	Yes (top 20 weight)	RLPSI < -44; RS > 19; CGM > 0.60; EGG for Yr, Lr and Cb < -0.50
-9	-9	-9	-9	9	Wt(-9,-9,-9,-9,9)	-0.54881	-0.657833	-0.645079	-0.501651	0	21.1804	0.607323	1.915	1.35	3.16	1.495	4.84	-47.5185	Yes (top 20 weight)	RLPSI < -44; RS > 19; CGM > 0.60; EGG for Yr, Lr and Cb < -0.50

## Sheet: Table S5E selected GIDs 4 wts
E) Details of the selected lines and cultivars based on four economic weights
Economic weights	GID	Name	Class	Stripe rust score	Leaf rust score	Leaf spot score	Common bunt score	Grain yield (t ha-1)	Index	Selected final
Wt(-9,-9,-9,-9,1)	GID-114	GP112	CWSP	1.3	1.1	2.7	1	5.1	-40.1197	Yes (Final)
Wt(-9,-9,-9,-9,1)	GID-002	5605HR CL	CWRS	2.2	1	2.3	1.5	4.9	-41.3695	Yes (Final)
Wt(-9,-9,-9,-9,1)	GID-190	SY637	CWRS	2.3	1	3	1	4.3	-42.0506	Yes (Final)
Wt(-9,-9,-9,-9,1)	GID-066	BYT14-11	CWRS	1.2	1.6	3.2	1	4.3	-42.062	Yes (Final)
Wt(-9,-9,-9,-9,1)	GID-169	Tracker	CWRS	1.6	1.5	2.5	1.5	4.9	-44.0421	Yes (Final)
Wt(-9,-9,-9,-9,1)	GID-016	AAC Penhold	CPSR	2.2	1	3	1.3	5.2	-45.6881	Yes (Final)
Wt(-9,-9,-9,-9,1)	GID-074	CDC Alsask	CWRS	2.4	1.8	2.7	1	4.6	-46.8263	Yes (Final)
Wt(-9,-9,-9,-9,1)	GID-166	Jake	CWRS	1.8	1.7	2.2	2.3	4.5	-47.0035	Yes (Final)
Wt(-9,-9,-9,-9,1)	GID-153	Pasteur	CWSP	2.1	1	2.8	1.8	5.9	-47.0332	Yes (Final)
Wt(-9,-9,-9,-9,1)	GID-061	AAC Redberry	CWRS	1.5	1.2	3.7	1.5	5	-47.8357	Yes (Final)
Wt(-9,-9,-9,-9,1)	GID-192	SY995	CPSR	2.3	1.5	3.2	1	5.1	-48.5459	Yes (Final)
Wt(-9,-9,-9,-9,1)	GID-124	AAC Castle	CPSR	1.7	1.9	3.2	1.3	5	-48.7358	Yes (Final)
Wt(-9,-9,-9,-9,1)	GID-071	Carberry	CWRS	1.8	1.6	3.7	1.3	4.5	-48.7768	Yes (Final)
Wt(-9,-9,-9,-9,1)	GID-060	AAC Concord	CNHR	1.7	1.6	3.3	1.8	4.7	-49.2876	Yes (Final)
Wt(-9,-9,-9,-9,1)	GID-145	MuchMore	CWRS	1.9	1.8	4	1	4.9	-51.1366	Yes (Final)
Wt(-9,-9,-9,-9,1)	GID-077	CDC Bradwell	CWRS	2.3	1.8	3.5	1.5	4.3	-51.369	Yes (Final)
Wt(-9,-9,-9,-9,1)	GID-011	AAC Elie	CWRS	1.6	1.9	3.5	1.8	4.9	-51.5771	Yes (Final)
Wt(-9,-9,-9,-9,1)	GID-004	5701PR	CPSR	1.8	1.4	3.2	2.5	5	-52.2658	Yes (Final)
Wt(-9,-9,-9,-9,1)	GID-006	AAC Bailey	CWRS	3.1	1	3.8	1.3	4.5	-52.3147	Yes (Final)
Wt(-9,-9,-9,-9,1)	GID-007	AAC Brandon	CWRS	1.5	1.1	3.7	2.5	5.2	-52.3292	Yes (Final)
Wt(-7,-9,-9,-9,1)	GID-114	GP112	CWSP	1.3	1.1	2.7	1	5.1	-37.4779	Yes (Final)
Wt(-7,-9,-9,-9,1)	GID-002	5605HR CL	CWRS	2.2	1	2.3	1.5	4.9	-37.8956	Yes (Final)
Wt(-7,-9,-9,-9,1)	GID-190	SY637	CWRS	2.3	1	3	1	4.3	-38.6384	Yes (Final)
Wt(-7,-9,-9,-9,1)	GID-066	BYT14-11	CWRS	1.2	1.6	3.2	1	4.3	-39.7316	Yes (Final)
Wt(-7,-9,-9,-9,1)	GID-169	Tracker	CWRS	1.6	1.5	2.5	1.5	4.9	-41.1576	Yes (Final)
Wt(-7,-9,-9,-9,1)	GID-016	AAC Penhold	CPSR	2.2	1	3	1.3	5.2	-42.1341	Yes (Final)
Wt(-7,-9,-9,-9,1)	GID-074	CDC Alsask	CWRS	2.4	1.8	2.7	1	4.6	-43.2337	Yes (Final)
Wt(-7,-9,-9,-9,1)	GID-153	Pasteur	CWSP	2.1	1	2.8	1.8	5.9	-43.3912	Yes (Final)
Wt(-7,-9,-9,-9,1)	GID-166	Jake	CWRS	1.8	1.7	2.2	2.3	4.5	-44.0285	Yes (Final)
Wt(-7,-9,-9,-9,1)	GID-192	SY995	CPSR	2.3	1.5	3.2	1	5.1	-44.919	Yes (Final)
Wt(-7,-9,-9,-9,1)	GID-061	AAC Redberry	CWRS	1.5	1.2	3.7	1.5	5	-45.0241	Yes (Final)
Wt(-7,-9,-9,-9,1)	GID-124	AAC Castle	CPSR	1.7	1.9	3.2	1.3	5	-45.7258	Yes (Final)
Wt(-7,-9,-9,-9,1)	GID-071	Carberry	CWRS	1.8	1.6	3.7	1.3	4.5	-45.8025	Yes (Final)
Wt(-7,-9,-9,-9,1)	GID-060	AAC Concord	CNHR	1.7	1.6	3.3	1.8	4.7	-46.3583	Yes (Final)
Wt(-7,-9,-9,-9,1)	GID-077	CDC Bradwell	CWRS	2.3	1.8	3.5	1.5	4.3	-47.9554	Yes (Final)
Wt(-7,-9,-9,-9,1)	GID-145	MuchMore	CWRS	1.9	1.8	4	1	4.9	-47.9569	Yes (Final)
Wt(-7,-9,-9,-9,1)	GID-006	AAC Bailey	CWRS	3.1	1	3.8	1.3	4.5	-48.0613	Yes (Final)
Wt(-7,-9,-9,-9,1)	GID-011	AAC Elie	CWRS	1.6	1.9	3.5	1.8	4.9	-48.6925	Yes (Final)
Wt(-7,-9,-9,-9,1)	GID-004	5701PR	CPSR	1.8	1.4	3.2	2.5	5	-49.1583	Yes (Final)
Wt(-7,-9,-9,-9,1)	GID-132	Kane	CNHR	2.8	1.8	3.8	1	4.5	-49.2554	Yes (Final)
Wt(-9,-7,-9,-9,1)	GID-114	GP112	CWSP	1.3	1.1	2.7	1	5.1	-38.2055	Yes (Final)
Wt(-9,-7,-9,-9,1)	GID-066	BYT14-11	CWRS	1.2	1.6	3.2	1	4.3	-39.7851	Yes (Final)
Wt(-9,-7,-9,-9,1)	GID-002	5605HR CL	CWRS	2.2	1	2.3	1.5	4.9	-40.0783	Yes (Final)
Wt(-9,-7,-9,-9,1)	GID-190	SY637	CWRS	2.3	1	3	1	4.3	-40.6597	Yes (Final)
Wt(-9,-7,-9,-9,1)	GID-169	Tracker	CWRS	1.6	1.5	2.5	1.5	4.9	-41.766	Yes (Final)
Wt(-9,-7,-9,-9,1)	GID-016	AAC Penhold	CPSR	2.2	1	3	1.3	5.2	-44.0525	Yes (Final)
Wt(-9,-7,-9,-9,1)	GID-074	CDC Alsask	CWRS	2.4	1.8	2.7	1	4.6	-44.3024	Yes (Final)
Wt(-9,-7,-9,-9,1)	GID-166	Jake	CWRS	1.8	1.7	2.2	2.3	4.5	-44.5952	Yes (Final)
Wt(-9,-7,-9,-9,1)	GID-153	Pasteur	CWSP	2.1	1	2.8	1.8	5.9	-45.5797	Yes (Final)
Wt(-9,-7,-9,-9,1)	GID-061	AAC Redberry	CWRS	1.5	1.2	3.7	1.5	5	-45.8391	Yes (Final)
Wt(-9,-7,-9,-9,1)	GID-124	AAC Castle	CPSR	1.7	1.9	3.2	1.3	5	-46.049	Yes (Final)
Wt(-9,-7,-9,-9,1)	GID-192	SY995	CPSR	2.3	1.5	3.2	1	5.1	-46.2365	Yes (Final)
Wt(-9,-7,-9,-9,1)	GID-071	Carberry	CWRS	1.8	1.6	3.7	1.3	4.5	-46.4669	Yes (Final)
Wt(-9,-7,-9,-9,1)	GID-060	AAC Concord	CNHR	1.7	1.6	3.3	1.8	4.7	-46.9453	Yes (Final)
Wt(-9,-7,-9,-9,1)	GID-009	AAC Connery	CWRS	1.6	3.1	3.5	1	4.5	-48.5589	Yes (Final)
Wt(-9,-7,-9,-9,1)	GID-145	MuchMore	CWRS	1.9	1.8	4	1	4.9	-48.5645	Yes (Final)
Wt(-9,-7,-9,-9,1)	GID-077	CDC Bradwell	CWRS	2.3	1.8	3.5	1.5	4.3	-48.894	Yes (Final)
Wt(-9,-7,-9,-9,1)	GID-011	AAC Elie	CWRS	1.6	1.9	3.5	1.8	4.9	-48.9068	Yes (Final)
Wt(-9,-7,-9,-9,1)	GID-004	5701PR	CPSR	1.8	1.4	3.2	2.5	5	-50.0719	Yes (Final)
Wt(-9,-7,-9,-9,1)	GID-007	AAC Brandon	CWRS	1.5	1.1	3.7	2.5	5.2	-50.3988	Yes (Final)
Wt(-9,-9,-7,-9,1)	GID-114	GP112	CWSP	1.3	1.1	2.7	1	5.1	-36.5367	Yes (Final)
Wt(-9,-9,-7,-9,1)	GID-066	BYT14-11	CWRS	1.2	1.6	3.2	1	4.3	-38.1312	Yes (Final)
Wt(-9,-9,-7,-9,1)	GID-002	5605HR CL	CWRS	2.2	1	2.3	1.5	4.9	-38.2175	Yes (Final)
Wt(-9,-9,-7,-9,1)	GID-190	SY637	CWRS	2.3	1	3	1	4.3	-38.3177	Yes (Final)
Wt(-9,-9,-7,-9,1)	GID-169	Tracker	CWRS	1.6	1.5	2.5	1.5	4.9	-40.6923	Yes (Final)
Wt(-9,-9,-7,-9,1)	GID-016	AAC Penhold	CPSR	2.2	1	3	1.3	5.2	-41.7922	Yes (Final)
Wt(-9,-9,-7,-9,1)	GID-153	Pasteur	CWSP	2.1	1	2.8	1.8	5.9	-43.2078	Yes (Final)
Wt(-9,-9,-7,-9,1)	GID-061	AAC Redberry	CWRS	1.5	1.2	3.7	1.5	5	-43.2863	Yes (Final)
Wt(-9,-9,-7,-9,1)	GID-074	CDC Alsask	CWRS	2.4	1.8	2.7	1	4.6	-43.3338	Yes (Final)
Wt(-9,-9,-7,-9,1)	GID-166	Jake	CWRS	1.8	1.7	2.2	2.3	4.5	-44.0218	Yes (Final)
Wt(-9,-9,-7,-9,1)	GID-071	Carberry	CWRS	1.8	1.6	3.7	1.3	4.5	-44.3177	Yes (Final)
Wt(-9,-9,-7,-9,1)	GID-192	SY995	CPSR	2.3	1.5	3.2	1	5.1	-44.4706	Yes (Final)
Wt(-9,-9,-7,-9,1)	GID-124	AAC Castle	CPSR	1.7	1.9	3.2	1.3	5	-44.6782	Yes (Final)
Wt(-9,-9,-7,-9,1)	GID-060	AAC Concord	CNHR	1.7	1.6	3.3	1.8	4.7	-45.1863	Yes (Final)
Wt(-9,-9,-7,-9,1)	GID-145	MuchMore	CWRS	1.9	1.8	4	1	4.9	-46.3094	Yes (Final)
Wt(-9,-9,-7,-9,1)	GID-077	CDC Bradwell	CWRS	2.3	1.8	3.5	1.5	4.3	-47.1431	Yes (Final)
Wt(-9,-9,-7,-9,1)	GID-011	AAC Elie	CWRS	1.6	1.9	3.5	1.8	4.9	-47.2424	Yes (Final)
Wt(-9,-9,-7,-9,1)	GID-007	AAC Brandon	CWRS	1.5	1.1	3.7	2.5	5.2	-47.744	Yes (Final)
Wt(-9,-9,-7,-9,1)	GID-006	AAC Bailey	CWRS	3.1	1	3.8	1.3	4.5	-47.7579	Yes (Final)
Wt(-9,-9,-7,-9,1)	GID-009	AAC Connery	CWRS	1.6	3.1	3.5	1	4.5	-48.0837	Yes (Final)

## Sheet: Table S5F Summary
F) Summary of 22 selected cultivars and lines based on 4 economic weights (17 of the 22 genotypes were selected using all 4 weights)
Name	GID	Class	No. of economic weights	Stripe rust score	Leaf rust score	Leaf spot score	Common bunt score	Grain yield (t ha-1)	Index	Resistance group
5605HR CL	GID-002	CWRS	4	2.2	1	2.3	1.5	4.9	-39.3902	b
5701PR	GID-004	CPSR	3	1.8	1.4	3.2	2.5	5	-50.4987	c
AAC Bailey	GID-006	CWRS	3	3.1	1	3.8	1.3	4.5	-49.378	b
AAC Brandon	GID-007	CWRS	3	1.5	1.1	3.7	2.5	5.2	-50.1573	c
AAC Castle	GID-124	CPSR	4	1.7	1.9	3.2	1.3	5	-46.2972	a
AAC Concord	GID-060	CNHR	4	1.7	1.6	3.3	1.8	4.7	-46.9444	a
AAC Connery	GID-009	CWRS	2	1.6	3.1	3.5	1	4.5	-48.3213	d
AAC Elie	GID-011	CWRS	4	1.6	1.9	3.5	1.8	4.9	-49.1047	a
AAC Penhold	GID-016	CPSR	4	2.2	1	3	1.3	5.2	-43.4167	b
AAC Redberry	GID-061	CWRS	4	1.5	1.2	3.7	1.5	5	-45.4963	a
BYT14-11	GID-066	CWRS	4	1.2	1.6	3.2	1	4.3	-39.9275	a
Carberry	GID-071	CWRS	4	1.8	1.6	3.7	1.3	4.5	-46.341	a
CDC Alsask	GID-074	CWRS	4	2.4	1.8	2.7	1	4.6	-44.4241	b
CDC Bradwell	GID-077	CWRS	4	2.3	1.8	3.5	1.5	4.3	-48.8404	b
GP112	GID-114	CWSP	4	1.3	1.1	2.7	1	5.1	-38.0849	a
Jake	GID-166	CWRS	4	1.8	1.7	2.2	2.3	4.5	-44.9122	c
Kane	GID-132	CNHR	1	2.8	1.8	3.8	1	4.5	-49.2554	b
MuchMore	GID-145	CWRS	4	1.9	1.8	4	1	4.9	-48.4919	a
Pasteur	GID-153	CWSP	4	2.1	1	2.8	1.8	5.9	-44.803	b
SY637	GID-190	CWRS	4	2.3	1	3	1	4.3	-39.9166	b
SY995	GID-192	CPSR	4	2.3	1.5	3.2	1	5.1	-46.043	b
Tracker	GID-169	CWRS	4	1.6	1.5	2.5	1.5	4.9	-41.9145	a
	Disease rating system classification:
		R to HR: 0-20% (or <2 in a 1-9 scale)
		MR: 20-40% (2-4 in a 1-9 scale)
		I: 40-50% (4-5 in a 1-9 scale)
		MS: 50-70% (5-6 a in 1-9 scale)
		S: 70-100% (7-9 in a 1-9 scale)
