# Supplementary material for: Identification of Disease Resistance Parents and Genome-Wide Association Mapping of Resistance in Spring Wheat
Source: Plants (Basel). 2022 Oct 28;11(21):2905. doi: 10.3390/plants11212905 (PMC9658635; doi:10.3390/plants11212905)
Supplement: Supplementary file 1 [file plants-11-02905-s001.zip › Table S6 GWAS detail results R1.xlsx]

## Sheet: Table S6A
Table S6. Significant marker trait associations identified based on disease scores recorded in individual and combined environments and weighted mixed linear model.
A) Significant marker trait associations identified based on disease scores recorded in individual and combined environments.
Trait-Year-Location	Trait	Marker	Chr (IWGSC RefSeq v2.0)	Position (IWGSC RefSeq v2.0)	Chr (IWGSC RefSeq v1.0)	Position (IWGSC RefSeq v1.0)	P value	Marker R2 (%)	Genetic variance	Residual varinace	-2LnLikelihood	Significance
Yr-2016-Edm	Stripe rust	Excalibur_c19908_459	1A	343935539	1A	342383352	0.00011135	7.491	2.55031	1.48565	810.87	p < 0.00031
Yr-2016-Edm	Stripe rust	BS00022665_51	2A	5811999	2A	3962492	1.13e-05	9.555	2.2503	1.64303	807.132	p < 0.00031
Yr-2016-Edm	Stripe rust	TA002254-0660	2A	6827683	2A	4900877	0.00014622	7.241	2.45839	1.56544	811.347	p < 0.00031
Yr-2016-Edm	Stripe rust	tplb0032i02_1127	2A	7598988	2A	62722759	6.9073e-05	7.935	3.1858	1.03853	810.903	p < 0.00031
Yr-2016-Edm	Stripe rust	Excalibur_c4748_360	2A	15308414	2A	12336524	0.00023493	6.81	2.53296	1.52414	812.638	p < 0.00031
Yr-2016-Edm	Stripe rust	RAC875_c2300_1021	2A	15311992	2A	12340102	0.00023493	6.81	2.53296	1.52414	812.638	p < 0.00031
Yr-2016-Edm	Stripe rust	BS00086533_51	2B	812244914	2B	794050908	2.1734e-06	11.034	2.332	1.52062	803.907	p < 0.00031
Yr-2016-Edm	Stripe rust	Lr34_wMAS000004	7D	48955909	7D	47418536	2.3357e-06	10.988	3.12981	0.97344	804.591	p < 0.00031
Yr-2016-Edm	Stripe rust	wsnp_BE499546B_Ta_2_1	4B	638809518	4B	639844869	0.0002118	6.941	2.63254	1.46028	807.871	p < 0.00031
Yr-2016-Edm	Stripe rust	RAC875_c48025_483	4B	666204303	4B	666053528	5.7169e-05	8.098	2.63485	1.40067	809.916	p < 0.00031
Yr-2016-Edm	Stripe rust	Excalibur_c26571_507	4B	672284740	4B	671760828	0.00026571	6.702	2.8109	1.32534	812.946	p < 0.00031
Yr-2016-Edm	Stripe rust	Excalibur_c11045_236	5A	547615657	5A	547042483	0.0001311	7.332	2.10459	1.85503	811.968	p < 0.00031
Yr-2016-Leth	Stripe rust	BS00110397_51	2B	26595878	2B	23555095	0.0001785	7.088	2.59981	1.92871	835.787	p < 0.00031
Yr-2016-Leth	Stripe rust	RAC875_c15695_487	2B	123342107	2B	115384304	0.00025342	6.771	3.18717	1.50998	837.658	p < 0.00031
Yr-2016-Leth	Stripe rust	IAAV6424	2B	700111716	2B	691780816	0.00027186	6.704	2.72602	1.84534	836.741	p < 0.00031
Yr-2016-Leth	Stripe rust	Excalibur_c35631_1020	2D	553135236	2D	550229124	5.6942e-05	8.131	2.5943	1.88789	834.504	p < 0.00031
Yr-2016-Leth	Stripe rust	Lr34_wMAS000004	7D	48955909	7D	47418536	1.6358e-06	11.339	3.08722	1.39825	827.76	p < 0.00031
Yr-2016-Leth	Stripe rust	wsnp_BE499546B_Ta_2_1	4B	638809518	4B	639844869	2.6678e-05	8.866	2.75913	1.74854	828.04	p < 0.00031
Yr-2016-Leth	Stripe rust	RAC875_c36213_352	4B	638812344	4B	639847695	0.00010959	7.572	2.70787	1.84288	830.692	p < 0.00031
Yr-2016-Leth	Stripe rust	Excalibur_c49297_159	4B	638813440	4B	639848791	0.00010617	7.563	2.68936	1.83721	835.078	p < 0.00031
Yr-2017-Leth	Stripe rust	RAC875_c102223_220	1A	497942015	1B	536706387	5.7122e-05	8.039	0.22417	2.17354	716.613	p < 0.00031
Yr-2017-Leth	Stripe rust	Tdurum_contig16865_174	1B	540583488	1B	533963879	3.4647e-06	10.671	0.2695	2.05583	704.564	p < 0.00031
Yr-2017-Leth	Stripe rust	RFL_Contig4977_2333	1B	542155702	1B	535546139	9.5241e-05	7.692	0.22951	2.19894	706.932	p < 0.00031
Yr-2017-Leth	Stripe rust	CAP12_c1129_220	1B	542406384	1B	535797834	0.00013042	7.362	0.21133	2.23238	712.461	p < 0.00031
Yr-2017-Leth	Stripe rust	CAP7_c1625_317	1B	542406522	1B	535797972	0.00024668	6.829	0.26782	2.1668	708.166	p < 0.00031
Yr-2017-Leth	Stripe rust	Tdurum_contig42016_333	1B	542407791	1B	535799241	0.00025966	6.746	0.26067	2.16592	712.158	p < 0.00031
Yr-2017-Leth	Stripe rust	BS00066006_51	1B	547332148	1B	540726745	8.7265e-05	7.732	0.22076	2.20756	711.546	p < 0.00031
Yr-2017-Leth	Stripe rust	Excalibur_c40993_1129	1B	547335426	1B	540730023	0.0001329	7.313	0.22641	2.19745	714.026	p < 0.00031
Yr-2017-Leth	Stripe rust	Excalibur_c21451_352	1B	547487795	1B	540847896	0.0001329	7.313	0.22641	2.19745	714.026	p < 0.00031
Yr-2017-Leth	Stripe rust	BS00038643_51	1B	549553218	1B	542927221	4.636e-05	8.302	0.20629	2.21381	710.607	p < 0.00031
Yr-2017-Leth	Stripe rust	Excalibur_c8613_1266	1B	549646127	1B	543011530	2.4098e-05	8.877	0.17056	2.2552	710.197	p < 0.00031
Yr-2017-Leth	Stripe rust	GENE-0480_265	1B	549650291	1B	543015694	2.4098e-05	8.877	0.17056	2.2552	710.197	p < 0.00031
Yr-2017-Leth	Stripe rust	IAAV3567	1B	551960797	1B	545207315	1.3946e-05	9.375	0.17607	2.23194	708.973	p < 0.00031
Yr-2017-Leth	Stripe rust	Ku_c3647_2429	1B	551961673	1B	545208191	1.3946e-05	9.375	0.17607	2.23194	708.973	p < 0.00031
Yr-2017-Leth	Stripe rust	Ku_c3647_769	1B	551965291	1B	545211809	1.3946e-05	9.375	0.17607	2.23194	708.973	p < 0.00031
Yr-2017-Leth	Stripe rust	wsnp_Ku_c23096_32987510	1B	555356254	1B	548626957	0.00013071	7.367	0.23312	2.1992	712.121	p < 0.00031
Yr-2017-Leth	Stripe rust	BobWhite_c33069_114	1B	555402825	1B	548674118	4.304e-06	10.405	0.14115	2.26243	707.764	p < 0.00031
Yr-2017-Leth	Stripe rust	wsnp_JD_c6331_7499499	1B	555695646	1B	548967544	0.00028645	6.649	0.22883	2.22566	713.666	p < 0.00031
Yr-2017-Leth	Stripe rust	Ra_c698_1987	1B	556508464	1B	549784589	1.3088e-05	9.425	0.16534	2.24841	709.154	p < 0.00031
Yr-2017-Leth	Stripe rust	wsnp_Ex_rep_c69766_68723140	1B	557730504	1B	551011546	8.129e-05	7.758	0.14106	2.3385	713.502	p < 0.00031
Yr-2017-Leth	Stripe rust	GENE-0120_431	1B	557732029	1B	551013071	9.9747e-05	7.541	0.1512	2.31326	715.363	p < 0.00031
Yr-2017-Leth	Stripe rust	GENE-0120_397	1B	557732063	1B	551013105	9.9747e-05	7.541	0.1512	2.31326	715.363	p < 0.00031
Yr-2017-Leth	Stripe rust	wsnp_Ex_c16551_25061517	5A	6014755	5A	4848394	2.3812e-05	8.786	0.14835	2.27523	716.968	p < 0.00031
Yr-2017-Leth	Stripe rust	wsnp_Ex_c16551_25060833	5A	6015819	5A	4849458	2.3812e-05	8.786	0.14835	2.27523	716.968	p < 0.00031
Yr-2017-Leth	Stripe rust	IAAV1592	5A	6015827	5A	4849466	2.3812e-05	8.786	0.14835	2.27523	716.968	p < 0.00031
Yr-2017-Leth	Stripe rust	Ra_c2139_968	5A	6016551	5A	4850190	2.3812e-05	8.786	0.14835	2.27523	716.968	p < 0.00031
Yr-2017-Leth	Stripe rust	Ra_c2139_967	5A	6016552	5A	4850191	2.3812e-05	8.786	0.14835	2.27523	716.968	p < 0.00031
Yr-2017-Leth	Stripe rust	wsnp_BF474606A_Td_2_1	5A	6016853	5A	4850492	2.3812e-05	8.786	0.14835	2.27523	716.968	p < 0.00031
Yr-2017-Leth	Stripe rust	IAAV5087	5A	6016957	5A	4850596	2.3812e-05	8.786	0.14835	2.27523	716.968	p < 0.00031
Yr-2017-Leth	Stripe rust	GENE-3111_152	5D	7544172	5D	7412388	6.4282e-05	7.903	0.15955	2.28078	718.557	p < 0.00031
Yr-2017-Leth	Stripe rust	Ku_c22875_172	7A	519096025	7A	515006880	0.00024426	6.671	0.11058	2.40595	722.924	p < 0.00031
Yr-2017-Leth	Stripe rust	Tdurum_contig76683_147	7A	569228586	7A	565340970	0.00016057	7.131	0.33488	2.04691	717.481	p < 0.00031
Yr-2017-Leth	Stripe rust	Tdurum_contig93706_108	7A	570417453	7B	528752976	0.000158	7.196	0.43252	1.93971	713.155	p < 0.00031
Yr-2017-Leth	Stripe rust	Kukri_c12317_1332	7A	571457818	7A	567577585	0.000158	7.196	0.43252	1.93971	713.155	p < 0.00031
Yr-2017-Leth	Stripe rust	Tdurum_contig66023_89	7A	728048332	7A	721918528	0.00023135	6.746	0.15165	2.32732	721.234	p < 0.00031
Yr-2017-Leth	Stripe rust	RAC875_c58060_75	7B	532908227	7B	528752467	0.00014163	7.259	0.43142	1.92927	716.928	p < 0.00031
Yr-2017-Leth	Stripe rust	Tdurum_contig93706_517	7B	532908327	7B	528752567	0.00014163	7.259	0.43142	1.92927	716.928	p < 0.00031
Yr-2017-Leth	Stripe rust	Kukri_c29470_185	7B	532908354	7B	528752594	0.00014163	7.259	0.43142	1.92927	716.928	p < 0.00031
Yr-2017-Leth	Stripe rust	Tdurum_contig93706_390	7B	532908454	7B	528752694	0.00014163	7.259	0.43142	1.92927	716.928	p < 0.00031
Yr-2017-Leth	Stripe rust	RAC875_rep_c106651_635	7B	532922558	7B	528767102	0.00014163	7.259	0.43142	1.92927	716.928	p < 0.00031
Yr-2017-Leth	Stripe rust	RAC875_rep_c106651_490	7B	532922803	7B	528767347	0.00014163	7.259	0.43142	1.92927	716.928	p < 0.00031
Yr-2017-Leth	Stripe rust	Excalibur_rep_c111831_114	7B	532922860	7B	528767404	0.00014163	7.259	0.43142	1.92927	716.928	p < 0.00031
Yr-2017-Leth	Stripe rust	GENE-3849_389	7B	532922968	7B	528767512	0.00014163	7.259	0.43142	1.92927	716.928	p < 0.00031
Yr-2017-Leth	Stripe rust	Tdurum_contig68339_71	7B	533018119	7B	528862856	0.00014163	7.259	0.43142	1.92927	716.928	p < 0.00031
Yr-2017-Leth	Stripe rust	Tdurum_contig19022_1524	7B	534521607	7B	530376010	0.00014163	7.259	0.43142	1.92927	716.928	p < 0.00031
Yr-2017-Leth	Stripe rust	Tdurum_contig19022_1555	7B	534521638	7B	530376041	0.00014163	7.259	0.43142	1.92927	716.928	p < 0.00031
Yr-2017-Leth	Stripe rust	Kukri_c12317_336	7B	534521738	7B	530376141	0.00014163	7.259	0.43142	1.92927	716.928	p < 0.00031
Yr-2017-Leth	Stripe rust	Tdurum_contig4937_234	7B	535769831	Ukn	380532036	0.00014163	7.259	0.43142	1.92927	716.928	p < 0.00031
Yr-2017-Leth	Stripe rust	Tdurum_contig89487_388	7B	535773385	7B	531645663	0.00014163	7.259	0.43142	1.92927	716.928	p < 0.00031
Yr-2017-Leth	Stripe rust	Excalibur_c41771_990	7B	535773950	7B	531646228	0.000158	7.196	0.43252	1.93971	713.155	p < 0.00031
Yr-2017-Leth	Stripe rust	Tdurum_contig25895_484	7B	535784056	7B	531656334	0.00014163	7.259	0.43142	1.92927	716.928	p < 0.00031
Yr-2017-Leth	Stripe rust	RAC875_c68398_75	7B	535784156	7B	531656434	0.00014163	7.259	0.43142	1.92927	716.928	p < 0.00031
Yr-2017-Leth	Stripe rust	BS00071424_51	7B	600098356	7A	636898869	0.00024057	6.749	0.26059	2.15618	718.887	p < 0.00031
Yr-2017-Leth	Stripe rust	RAC875_c15681_1839	7D	502453850	7D	500628803	0.00014163	7.259	0.43142	1.92927	716.928	p < 0.00031
Yr-2017-Leth	Stripe rust	Kukri_c12317_179	7D	502911441	7B	530376298	0.00014163	7.259	0.43142	1.92927	716.928	p < 0.00031
Yr-2018-Cres	Stripe rust	Kukri_c45015_363	2A	121822260	2A	117180709	0.00021954	6.825	0.45304	1.08267	636.161	p < 0.00031
Yr-2018-Cres	Stripe rust	Kukri_c45015_145	2A	121822478	2A	117180927	0.00021954	6.825	0.45304	1.08267	636.161	p < 0.00031
Yr-2018-Cres	Stripe rust	wsnp_Ex_c12219_19526749	2A	122031744	2A	117390803	0.00021954	6.825	0.45304	1.08267	636.161	p < 0.00031
Yr-2018-Cres	Stripe rust	wsnp_Ex_c3695_6740339	2A	764617313	2A	759830539	7.3561e-05	7.823	0.50233	1.01686	634.107	p < 0.00031
Yr-2018-Cres	Stripe rust	BS00086533_51	2B	812244914	2B	794050908	0.00029892	6.535	0.39653	1.14863	637.246	p < 0.00031
Yr-2018-Cres	Stripe rust	RAC875_c259_1339	2D	635291344	2A	759830867	0.00020417	6.902	0.5248	1.01063	636.041	p < 0.00031
Yr-2018-Cres	Stripe rust	BS00036168_51	3A	688709273	3A	688617143	0.00011775	7.381	0.41012	1.11891	635.213	p < 0.00031
Yr-2018-Cres	Stripe rust	wsnp_CAP12_c15_9559	3A	688763805	3A	688673158	0.000245	6.721	0.42373	1.11543	636.52	p < 0.00031
Yr-2018-Cres	Stripe rust	wsnp_CAP11_c68_106078	3A	688763853	3A	688673206	0.000245	6.721	0.42373	1.11543	636.52	p < 0.00031
Yr-2018-Cres	Stripe rust	RAC875_c15109_106	3B	747116982	3A	688675438	0.00018441	6.97	0.38865	1.14998	636.328	p < 0.00031
Yr-2018-Cres	Stripe rust	IAAV7323	4B	5666794	4B	6149764	0.00027379	6.635	0.52004	1.0195	636.427	p < 0.00031
Yr-2018-Cres	Stripe rust	wsnp_BE499546B_Ta_2_1	4B	638809518	4B	639844869	9.3007e-05	7.636	0.43485	1.09388	631.013	p < 0.00031
Yr-2018-Cres	Stripe rust	RAC875_c36213_352	4B	638812344	4B	639847695	5.8315e-05	8.06	0.43477	1.08673	630.076	p < 0.00031
Yr-2018-Cres	Stripe rust	Excalibur_c49297_159	4B	638813440	4B	639848791	6.1429e-05	7.972	0.42872	1.0887	633.856	p < 0.00031
Yr-2018-Cres	Stripe rust	wsnp_JD_c3181_4176512	5B	288574238	5B	285504929	2.3863e-05	8.802	0.35294	1.15942	632.863	p < 0.00031
Yr-2018-Cres	Stripe rust	RAC875_c13610_1599	6A	2053373	6B	167586	0.00022545	6.793	0.4083	1.13104	636.508	p < 0.00031
Yr-2018-Cres	Stripe rust	RAC875_c37871_249	6A	2054698	6A	1500170	0.00021339	6.841	0.40194	1.13726	636.48	p < 0.00031
Yr-2018-Cres	Stripe rust	BS00062956_51	6B	10229961	6B	8387579	0.00023459	6.756	0.40394	1.13651	636.614	p < 0.00031
Yr-2018-Cres	Stripe rust	IACX9205	6B	10230547	6B	8388165	0.00025295	6.722	0.40414	1.14399	633.252	p < 0.00031
Yr-2018-Cres	Stripe rust	RAC875_rep_c77197_202	6B	10690464	6B	8781473	0.00020104	6.936	0.42708	1.11524	632.573	p < 0.00031
Yr-2018-Cres	Stripe rust	RAC875_c58425_110	6B	10690475	6B	8781484	0.00025295	6.722	0.40414	1.14399	633.252	p < 0.00031
Yr-2018-Cres	Stripe rust	BS00009825_51	6B	10909413	6B	9003351	0.00023459	6.756	0.40394	1.13651	636.614	p < 0.00031
Yr-2018-Cres	Stripe rust	BS00003748_51	6B	10909829	6B	9003767	0.00025295	6.722	0.40414	1.14399	633.252	p < 0.00031
Yr-2018-Cres	Stripe rust	BS00003622_51	6B	10909871	6B	9003809	0.00012245	7.382	0.40863	1.12759	631.817	p < 0.00031
Yr-2018-Cres	Stripe rust	Kukri_c21405_2131	6D	2387759	6D	2406212	0.0002335	6.762	0.41114	1.12844	636.572	p < 0.00031
Yr-2018-Edm	Stripe rust	Excalibur_c16154_246	1B	484771257	1B	478566699	9.6927e-05	7.607	1.1288	0.57004	643.833	p < 0.00031
Yr-2018-Edm	Stripe rust	BS00066006_51	1B	547332148	1B	540726745	0.00017292	7.142	0.94505	0.73013	640.367	p < 0.00031
Yr-2018-Edm	Stripe rust	wsnp_Ku_c17017_26019611	1D	425615356	1B	572532662	0.00029779	6.584	1.08596	0.61726	646.1	p < 0.00031
Yr-2018-Edm	Stripe rust	Kukri_c40204_141	2A	8335473	Ukn	11732070	0.00018197	7.035	1.13186	0.57648	644.952	p < 0.00031
Yr-2018-Edm	Stripe rust	Kukri_rep_c69177_180	2A	14916115	2A	12001239	0.00029537	6.586	0.97282	0.70715	646.35	p < 0.00031
Yr-2018-Edm	Stripe rust	Kukri_rep_c103261_918	2A	14917409	2A	12002533	0.00029537	6.586	0.97282	0.70715	646.35	p < 0.00031
Yr-2018-Edm	Stripe rust	RAC875_c7956_234	2B	452318647	2B	443825159	0.000227	6.835	1.17205	0.55097	645.343	p < 0.00031
Yr-2018-Edm	Stripe rust	Kukri_c32845_116	4A	676974152	4A	675135139	2.6146e-05	8.787	1.00322	0.64667	641.482	p < 0.00031
Yr-2018-Edm	Stripe rust	GENE-3129_890	7A	65788443	4A	674554677	4.1687e-06	10.437	1.01167	0.61384	637.856	p < 0.00031
Yr-2018-Edm	Stripe rust	GENE-3129_828	7A	65788501	4A	674554735	9.2308e-06	9.723	0.98969	0.64246	639.518	p < 0.00031
Yr-2018-Edm	Stripe rust	BobWhite_c40479_283	7A	66015264	7D	58258769	2.0865e-05	8.991	1.00262	0.64389	641.036	p < 0.00031
Yr-2018-Edm	Stripe rust	Kukri_c92151_216	7D	60221820	7D	58485486	3.2682e-05	8.587	1.0311	0.62792	641.785	p < 0.00031
Yr-2018-Edm	Stripe rust	D_GDS7LZN02FSYZC_227	7D	60228099	7D	58491765	3.2682e-05	8.587	1.0311	0.62792	641.785	p < 0.00031
Yr-2018-Edm	Stripe rust	TA002473-0717	7D	60379893	7D	58644244	3.6387e-06	10.556	0.97813	0.63836	637.741	p < 0.00031
Yr-2018-Edm	Stripe rust	RAC875_c29314_291	7D	60589793	7D	58856368	7.5595e-05	7.83	1.07277	0.60787	643.327	p < 0.00031
Yr-2018-Leth	Stripe rust	RAC875_rep_c72158_2056	2B	779066859	2B	769908969	2.1203e-06	10.937	0.90075	3.47516	835.417	p < 0.00031
Yr-2018-Leth	Stripe rust	Kukri_c20258_161	5A	541240420	5A	540613156	0.0001212	7.343	1.05074	3.48771	842.808	p < 0.00031
Yr-2019-Leth	Stripe rust	wsnp_Ex_c18499_27344859	1A	580628671	1A	576896752	0.00022458	6.818	1.07071	3.47114	842.935	p < 0.00031
Yr-2019-Leth	Stripe rust	BS00106641_51	1A	580810206	1A	577079082	0.00022458	6.818	1.07071	3.47114	842.935	p < 0.00031
Yr-2019-Leth	Stripe rust	Tdurum_contig16865_174	1B	540583488	1B	533963879	5.1995e-05	8.191	0.72545	3.87396	834.997	p < 0.00031
Yr-2019-Leth	Stripe rust	BS00066006_51	1B	547332148	1B	540726745	0.00013662	7.327	0.88369	3.70414	835.363	p < 0.00031
Yr-2019-Leth	Stripe rust	BS00022824_51	1B	677741958	1A	577474264	0.00016254	7.111	1.0681	3.45916	842.288	p < 0.00031
Yr-2019-Leth	Stripe rust	Kukri_c40204_141	2A	8335473	Ukn	11732070	0.00029246	6.582	1.13397	3.41099	843.232	p < 0.00031
Yr-2019-Leth	Stripe rust	wsnp_BE499546B_Ta_2_1	4B	638809518	4B	639844869	0.00018857	7.027	1.36026	3.16635	837.286	p < 0.00031
Yr-2020-Cres	Stripe rust	Kukri_c51781_306	1A	571990139	1A	568547504	7.7923e-05	7.759	1.86949	2.21196	820.714	p < 0.00031
Yr-2020-Cres	Stripe rust	GENE-0223_239	1A	581040255	1A	577309748	0.00024342	6.723	1.74547	2.36734	823.097	p < 0.00031
Yr-2020-Cres	Stripe rust	Tdurum_contig16865_174	1B	540583488	1B	533963879	0.00028133	6.62	1.25135	2.8586	815.848	p < 0.00031
Yr-2020-Cres	Stripe rust	BS00066006_51	1B	547332148	1B	540726745	0.00016251	7.125	1.31687	2.76128	814.248	p < 0.00031
Yr-2020-Cres	Stripe rust	RAC875_c15695_487	2B	123342107	2B	115384304	0.00010687	7.476	1.92408	2.17683	821.749	p < 0.00031
Yr-2020-Cres	Stripe rust	Lr34_wMAS000004	7D	48955909	7D	47418536	1.3567e-05	9.325	1.76547	2.23718	817.558	p < 0.00031
Yr-2020-Cres	Stripe rust	wsnp_Ex_c3603_6584235	4D	444727059	4D	444526753	0.0003014	6.538	1.93033	2.21083	823.362	p < 0.00031
Yr-2020-Cres	Stripe rust	Kukri_c19466_231	7D	61676700	7D	59937065	0.00014194	7.231	2.20879	1.9563	822.321	p < 0.00031
Yr-2020-Edm	Stripe rust	Ex_c21793_378	1A	16064972	1A	14528863	0.0001978	7.003	0.00843	0.02486	-95.957	p < 0.00031
Yr-2020-Edm	Stripe rust	Ex_c21793_457	1A	16065051	1A	14528942	0.0001978	7.003	0.00843	0.02486	-95.957	p < 0.00031
Yr-2020-Edm	Stripe rust	BobWhite_rep_c66800_54	1A	51532045	1D	49422404	0.00018871	7.036	0.00374	0.03002	-96.475	p < 0.00031
Yr-2020-Edm	Stripe rust	BS00005206_51	1A	459687832	1B	480367886	2.984e-05	8.714	0.00307	0.03025	-99.921	p < 0.00031
Yr-2020-Edm	Stripe rust	Excalibur_c65533_414	1A	535411945	1A	533733515	2.2744e-05	8.964	0.00369	0.02936	-100.52	p < 0.00031
Yr-2020-Edm	Stripe rust	Excalibur_c28425_386	1A	537021946	1A	535335605	1.3766e-05	9.433	0.00954	0.02293	-100.53	p < 0.00031
Yr-2020-Edm	Stripe rust	Ra_c105075_272	1B	156684210	1B	150372446	0.0001978	7.003	0.00843	0.02486	-95.957	p < 0.00031
Yr-2020-Edm	Stripe rust	wsnp_Ex_c4774_8519623	1B	669143447	1B	660722135	8.206e-05	7.803	0.00535	0.02782	-98.169	p < 0.00031
Yr-2020-Edm	Stripe rust	RAC875_c1125_578	2A	18671044	2A	15608865	2.9719e-05	8.736	0.01031	0.02247	-98.69	p < 0.00031
Yr-2020-Edm	Stripe rust	Excalibur_c11398_971	2A	123081776	2A	118446612	0.00020602	6.966	0.00908	0.02424	-95.705	p < 0.00031
Yr-2020-Edm	Stripe rust	RAC875_c16697_1502	2A	129798723	2A	125204286	0.00018629	7.057	0.00755	0.02572	-96.334	p < 0.00031
Yr-2020-Edm	Stripe rust	Kukri_c4563_455	2A	138257486	2A	133704997	5.9486e-05	8.102	0.00902	0.02389	-98.034	p < 0.00031
Yr-2020-Edm	Stripe rust	RAC875_c68079_214	2A	138509659	2A	133959916	1.5435e-05	9.33	0.00989	0.02264	-100.21	p < 0.00031
Yr-2020-Edm	Stripe rust	RAC875_c34509_124	2A	145791669	2B	189596528	5.8437e-06	10.209	0.01076	0.02155	-101.66	p < 0.00031
Yr-2020-Edm	Stripe rust	wsnp_CAP11_c1787_968410	2A	153499873	2A	148871202	5.8437e-06	10.209	0.01076	0.02155	-101.66	p < 0.00031
Yr-2020-Edm	Stripe rust	Kukri_c14611_315	2A	155535742	2A	150914903	5.8437e-06	10.209	0.01076	0.02155	-101.66	p < 0.00031
Yr-2020-Edm	Stripe rust	GENE-1319_146	2A	155872872	2A	151255140	5.8437e-06	10.209	0.01076	0.02155	-101.66	p < 0.00031
Yr-2020-Edm	Stripe rust	TA001351-1193	2A	155876451	2A	151258886	5.8437e-06	10.209	0.01076	0.02155	-101.66	p < 0.00031
Yr-2020-Edm	Stripe rust	GENE-1181_694	2A	155881383	2B	209088666	5.8437e-06	10.209	0.01076	0.02155	-101.66	p < 0.00031
Yr-2020-Edm	Stripe rust	GENE-1181_262	2A	155881569	2A	151263860	5.8437e-06	10.209	0.01076	0.02155	-101.66	p < 0.00031
Yr-2020-Edm	Stripe rust	Excalibur_c27210_183	2A	156622381	2A	152010657	5.8437e-06	10.209	0.01076	0.02155	-101.66	p < 0.00031
Yr-2020-Edm	Stripe rust	BobWhite_c10015_641	2A	159017309	2A	154414057	5.8437e-06	10.209	0.01076	0.02155	-101.66	p < 0.00031
Yr-2020-Edm	Stripe rust	BobWhite_c2532_966	2A	159018830	2A	154415578	5.8437e-06	10.209	0.01076	0.02155	-101.66	p < 0.00031
Yr-2020-Edm	Stripe rust	Tdurum_contig27887_55	2A	160951736	2A	156366795	5.8437e-06	10.209	0.01076	0.02155	-101.66	p < 0.00031
Yr-2020-Edm	Stripe rust	BS00089457_51	2A	162509213	2A	157933779	5.8437e-06	10.209	0.01076	0.02155	-101.66	p < 0.00031
Yr-2020-Edm	Stripe rust	GENE-1028_694	2A	164440424	2A	159876200	5.8437e-06	10.209	0.01076	0.02155	-101.66	p < 0.00031
Yr-2020-Edm	Stripe rust	IAAV6190	2A	186763828	2A	182148940	0.00025529	6.802	0.00862	0.02482	-95.574	p < 0.00031
Yr-2020-Edm	Stripe rust	RAC875_c20226_454	2A	186763978	2A	182149090	0.00025529	6.802	0.00862	0.02482	-95.574	p < 0.00031
Yr-2020-Edm	Stripe rust	IAAV7660	2A	186917556	2A	182303394	0.00025529	6.802	0.00862	0.02482	-95.574	p < 0.00031
Yr-2020-Edm	Stripe rust	Kukri_rep_c82871_181	2A	191010565	2A	186415668	0.00027238	6.777	0.00871	0.0249	-93.072	p < 0.00031
Yr-2020-Edm	Stripe rust	Ku_c25974_191	2A	192542745	2A	187955712	0.00027238	6.777	0.00871	0.0249	-93.072	p < 0.00031
Yr-2020-Edm	Stripe rust	wsnp_Ex_c2536_4728768	2A	196647638	2A	192072462	0.00027238	6.777	0.00871	0.0249	-93.072	p < 0.00031
Yr-2020-Edm	Stripe rust	Ra_c3019_950	2A	196649164	2A	192073988	0.00025529	6.802	0.00862	0.02482	-95.574	p < 0.00031
Yr-2020-Edm	Stripe rust	Ra_c3019_1333	2A	196649624	2A	192074448	0.00025529	6.802	0.00862	0.02482	-95.574	p < 0.00031
Yr-2020-Edm	Stripe rust	wsnp_Ex_c25409_34677674	2A	197079437	2D	177860476	0.00025529	6.802	0.00862	0.02482	-95.574	p < 0.00031
Yr-2020-Edm	Stripe rust	RAC875_c8115_2703	2A	197081661	2A	192509893	0.00025529	6.802	0.00862	0.02482	-95.574	p < 0.00031
Yr-2020-Edm	Stripe rust	Ex_c32172_1677	2A	198690964	2A	194124417	0.00025529	6.802	0.00862	0.02482	-95.574	p < 0.00031
Yr-2020-Edm	Stripe rust	Excalibur_c18417_241	2A	199038016	2A	194472798	0.00025529	6.802	0.00862	0.02482	-95.574	p < 0.00031
Yr-2020-Edm	Stripe rust	RFL_Contig2364_754	2A	199874510	2A	195309735	0.00025529	6.802	0.00862	0.02482	-95.574	p < 0.00031
Yr-2020-Edm	Stripe rust	Kukri_c52614_291	2A	199879224	2A	195314441	0.0001978	7.003	0.00843	0.02486	-95.957	p < 0.00031
Yr-2020-Edm	Stripe rust	RAC875_c5569_548	2A	199920065	2A	195355281	0.00025529	6.802	0.00862	0.02482	-95.574	p < 0.00031
Yr-2020-Edm	Stripe rust	Excalibur_c42815_713	2A	200383103	2A	195819324	0.0001978	7.003	0.00843	0.02486	-95.957	p < 0.00031
Yr-2020-Edm	Stripe rust	RAC875_c59661_500	2A	200390142	2A	195826363	0.00025529	6.802	0.00862	0.02482	-95.574	p < 0.00031
Yr-2020-Edm	Stripe rust	Ex_c68445_724	2A	200683601	2A	196120655	0.00025529	6.802	0.00862	0.02482	-95.574	p < 0.00031
Yr-2020-Edm	Stripe rust	RAC875_rep_c74366_489	2A	200688767	2A	196125821	0.0001978	7.003	0.00843	0.02486	-95.957	p < 0.00031
Yr-2020-Edm	Stripe rust	RAC875_c24545_59	2A	200689413	2A	196126467	0.0001978	7.003	0.00843	0.02486	-95.957	p < 0.00031
Yr-2020-Edm	Stripe rust	wsnp_Ex_c33420_41911147	2A	204123598	2A	199582569	0.00027238	6.777	0.00871	0.0249	-93.072	p < 0.00031
Yr-2020-Edm	Stripe rust	RAC875_c15245_431	2A	209712453	2A	205200946	0.0001978	7.003	0.00843	0.02486	-95.957	p < 0.00031
Yr-2020-Edm	Stripe rust	wsnp_Ku_c3907_7157334	2A	209712603	2A	205201096	0.0001978	7.003	0.00843	0.02486	-95.957	p < 0.00031
Yr-2020-Edm	Stripe rust	Ex_c104555_477	2A	501851935	2B	437009343	7.2497e-06	9.982	0.00195	0.0313	-102.31	p < 0.00031
Yr-2020-Edm	Stripe rust	Excalibur_c2311_114	2A	781366497	2D	640213287	5.042e-05	8.253	0.00902	0.02384	-98.042	p < 0.00031
Yr-2020-Edm	Stripe rust	Kukri_rep_c101874_104	2B	193906445	2B	185761711	8.6606e-06	9.901	0.01087	0.02161	-101.18	p < 0.00031
Yr-2020-Edm	Stripe rust	TA011854-0699	2B	219233291	2A	147537067	5.8437e-06	10.209	0.01076	0.02155	-101.66	p < 0.00031
Yr-2020-Edm	Stripe rust	RAC875_c58476_70	2B	475639997	2B	467460119	0.00010297	7.588	0.00327	0.03041	-97.688	p < 0.00031
Yr-2020-Edm	Stripe rust	GENE-2601_393	2D	125037377	2D	122703800	1.5435e-05	9.33	0.00989	0.02264	-100.21	p < 0.00031
Yr-2020-Edm	Stripe rust	Kukri_rep_c101366_333	2D	143893847	2D	141474549	5.8437e-06	10.209	0.01076	0.02155	-101.66	p < 0.00031
Yr-2020-Edm	Stripe rust	GENE-1342_238	2D	156501421	2A	146959537	5.8437e-06	10.209	0.01076	0.02155	-101.66	p < 0.00031
Yr-2020-Edm	Stripe rust	wsnp_Ex_rep_c67621_66275106	2D	189761744	2A	200179403	0.00027238	6.777	0.00871	0.0249	-93.072	p < 0.00031
Yr-2020-Edm	Stripe rust	RAC875_c30148_90	3A	189540304	3A	177862414	0.00027238	6.777	0.00871	0.0249	-93.072	p < 0.00031
Yr-2020-Edm	Stripe rust	Excalibur_c3439_534	3A	527202990	3A	515898425	9.4306e-06	9.772	0.00708	0.02523	-101.89	p < 0.00031
Yr-2020-Edm	Stripe rust	Tdurum_contig32719_216	3A	553576410	3A	531631175	0.00017944	7.082	0.00371	0.03005	-96.661	p < 0.00031
Yr-2020-Edm	Stripe rust	Kukri_rep_c115341_118	3A	686884127	3A	686776650	2.893e-05	8.755	0.00672	0.02597	-99.95	p < 0.00031
Yr-2020-Edm	Stripe rust	Tdurum_contig8365_319	3A	690983557	3A	690976637	5.3676e-05	8.195	0.00791	0.02496	-98.41	p < 0.00031
Yr-2020-Edm	Stripe rust	Excalibur_c96921_206	3A	700710518	3A	700946070	2.3329e-05	8.95	0.00641	0.02623	-100.24	p < 0.00031
Yr-2020-Edm	Stripe rust	RAC875_c56512_68	4A	550087167	4A	551137720	7.1656e-05	7.91	0.00217	0.03178	-97.944	p < 0.00031
Yr-2020-Edm	Stripe rust	RAC875_c43902_315	4A	746307356	7A	6509296	9.4806e-06	9.714	0.00078056	0.0332	-100.79	p < 0.00031
Yr-2020-Edm	Stripe rust	Tdurum_contig42638_383	4A	746309730	4A	737382696	2.9522e-05	8.701	0.00119	0.03293	-99.05	p < 0.00031
Yr-2020-Edm	Stripe rust	RAC875_c7778_887	5A	339325949	5A	338894594	0.00010928	7.526	0.00213	0.03198	-97.123	p < 0.00031
Yr-2020-Edm	Stripe rust	GENE-3780_131	6B	726375034	6A	615457734	0.0002249	6.885	0.00816	0.02517	-95.848	p < 0.00031
Yr-2020-Edm	Stripe rust	Kukri_c24795_552	6D	11951465	6D	10906800	1.0428e-05	9.666	0.00308	0.02988	-101.93	p < 0.00031
Yr-2020-Edm	Stripe rust	RAC875_c4965_264	7A	6865231	7A	6537065	9.4806e-06	9.714	0.00078056	0.0332	-100.79	p < 0.00031
Yr-2020-Edm	Stripe rust	Ex_c1421_1813	7A	6867175	7A	6539009	9.4806e-06	9.714	0.00078056	0.0332	-100.79	p < 0.00031
Yr-2020-Edm	Stripe rust	Ra_c69906_620	7A	8070641	7A	7587735	9.4806e-06	9.714	0.00078056	0.0332	-100.79	p < 0.00031
Yr-2020-Edm	Stripe rust	CAP8_c6142_206	7A	581610475	1A	309700747	8.2337e-05	7.805	0.00894	0.02408	-97.4	p < 0.00031
Yr-2020-Edm	Stripe rust	Tdurum_contig35073_183	7A	629587483	7A	625603043	1.176e-08	15.689	0.02887	0.00793	-98.262	p < 0.00031
Yr-2020-Edm	Stripe rust	BS00003672_51	7A	722241570	7A	716403862	0.00029465	6.635	0.00653	0.02695	-95.713	p < 0.00031
Yr-2020-Edm	Stripe rust	BobWhite_c16529_703	7A	737424066	7A	730463258	1.424e-05	9.39	0.00408	0.02873	-101.51	p < 0.00031
Yr-2020-Edm	Stripe rust	CAP7_c1383_548	7B	28549585	7B	26236031	7.0318e-05	7.944	0.00543	0.02768	-98.438	p < 0.00031
Yr-2020-Edm	Stripe rust	wsnp_Ex_rep_c70959_69813693	7B	727787013	7B	718357235	0.00013236	7.36	0.00368	0.02998	-97.304	p < 0.00031
Yr-2020-Edm	Stripe rust	D_contig35094_423	7D	5561427	7D	5200716	4.4261e-05	8.323	0.00075783	0.03378	-97.791	p < 0.00031
Yr-2020-Edm	Stripe rust	wsnp_Ex_c2592_4822528	7D	164991881	7D	162972161	0.0001978	7.003	0.00843	0.02486	-95.957	p < 0.00031
Yr-2020-Edm	Stripe rust	IAAV7999	7D	516767611	7D	514890878	0.0001978	7.003	0.00843	0.02486	-95.957	p < 0.00031
Yr-Comb.	Stripe rust	Tdurum_contig16865_174	1B	540583488	1B	533963879	0.00019299	7.019	0.79722	1.22003	680.633	p < 0.00031
Yr-Comb.	Stripe rust	BS00086533_51	2B	812244914	2B	794050908	0.00011556	7.432	0.98595	1.03765	685.959	p < 0.00031
Yr-Comb.	Stripe rust	Lr34_wMAS000004	7D	48955909	7D	47418536	3.0322e-05	8.646	1.02503	0.97853	683.255	p < 0.00031
Yr-Comb.	Stripe rust	wsnp_BE499546B_Ta_2_1	4B	638809518	4B	639844869	5.624e-06	10.216	1.09573	0.89817	676.137	p < 0.00031
Yr-Comb.	Stripe rust	RAC875_c36213_352	4B	638812344	4B	639847695	4.8739e-05	8.263	1.10092	0.93294	680.191	p < 0.00031
Yr-Comb.	Stripe rust	Excalibur_c49297_159	4B	638813440	4B	639848791	4.6083e-05	8.272	1.09561	0.92774	683.755	p < 0.00031
Yr-Comb.	Stripe rust	Excalibur_c11045_236	5A	547615657	5A	547042483	0.00012597	7.355	1.01226	1.01608	685.428	p < 0.00031
Lr-2017-Edm	Leaf rust	BS00048610_51	1A	500926518	1B	543086017	9.0801e-05	7.445	0.79575	2.61251	787.94	p < 0.00031
Lr-2017-Edm	Leaf rust	BS00066006_51	1B	547332148	1B	540726745	1.5962e-05	9.116	0.98479	2.25299	770.667	p < 0.00031
Lr-2017-Edm	Leaf rust	Excalibur_c40993_1129	1B	547335426	1B	540730023	5.5786e-05	7.952	0.9549	2.38363	779.358	p < 0.00031
Lr-2017-Edm	Leaf rust	Excalibur_c21451_352	1B	547487795	1B	540847896	5.5786e-05	7.952	0.9549	2.38363	779.358	p < 0.00031
Lr-2017-Edm	Leaf rust	BS00038643_51	1B	549553218	1B	542927221	6.6806e-05	7.828	0.94538	2.34592	773.724	p < 0.00031
Lr-2017-Edm	Leaf rust	Excalibur_c8613_1266	1B	549646127	1B	543011530	0.00012805	7.249	0.96547	2.3455	774.827	p < 0.00031
Lr-2017-Edm	Leaf rust	wsnp_BG274294B_Ta_2_3	1B	549647134	1B	543012537	8.6211e-05	7.545	0.86018	2.47819	779.276	p < 0.00031
Lr-2017-Edm	Leaf rust	GENE-0480_265	1B	549650291	1B	543015694	0.00012805	7.249	0.96547	2.3455	774.827	p < 0.00031
Lr-2017-Edm	Leaf rust	RFL_Contig2324_729	2B	811197844	2B	794886416	9.5692e-05	7.519	1.53319	1.86982	786.353	p < 0.00031
Lr-2017-Edm	Leaf rust	Ku_c108793_228	3A	51644908	3B	63112422	6.4218e-05	7.812	1.0516	2.30695	785.485	p < 0.00031
Lr-2017-Edm	Leaf rust	CAP7_c10624_88	3B	616148037	3B	601120537	0.00011919	7.285	1.20743	2.16929	786.339	p < 0.00031
Lr-2017-Edm	Leaf rust	BS00041742_51	3B	802590425	3A	717903364	0.00025725	6.629	1.51229	1.91815	788.163	p < 0.00031
Lr-2017-Edm	Leaf rust	D_GCE8AKX01C0776_247	3D	436562297	3D	435648264	0.00030643	6.452	1.30852	2.10403	787.912	p < 0.00031
Lr-2017-Edm	Leaf rust	Ku_c26916_669	7A	422546607	7A	418105961	0.00015132	7.071	1.20182	2.18269	786.901	p < 0.00031
Lr-2017-Edm	Leaf rust	RAC875_c22886_235	7B	50518063	7B	48072467	9.3174e-05	7.427	0.81243	2.5928	787.863	p < 0.00031
Lr-2017-Edm	Leaf rust	Excalibur_c13094_523	7D	237972913	7D	235983031	0.00015481	7.061	1.28046	2.10796	786.793	p < 0.00031
Lr-2019-Mord	Leaf rust	wsnp_Ex_c25730_34991010	1A	582243529	1A	578519110	0.00015221	7.147	0.67655	2.06217	746.431	p < 0.00031
Lr-2019-Mord	Leaf rust	Kukri_c65610_572	1A	584791636	1A	580496817	0.00016477	7.12	0.73364	2.01159	742.349	p < 0.00031
Lr-2019-Mord	Leaf rust	IAAV4238	1A	587197786	1A	582867226	1.9732e-05	8.991	0.69577	1.98466	742.527	p < 0.00031
Lr-2019-Mord	Leaf rust	RAC875_c43002_382	1A	588785462	1A	584469376	0.0002724	6.631	0.76742	1.98096	747.25	p < 0.00031
Lr-2019-Mord	Leaf rust	Tdurum_contig8840_237	1B	661357952	1B	654028094	0.00011842	7.37	0.64735	2.08821	746.239	p < 0.00031
Lr-2019-Mord	Leaf rust	RAC875_c15695_487	2B	123342107	2B	115384304	9.6681e-05	7.573	0.80861	1.91163	745.72	p < 0.00031
Lr-2019-Mord	Leaf rust	Excalibur_c62234_105	2B	771850360	2B	762709794	0.00018506	6.949	0.53456	2.23876	747.854	p < 0.00031
Lr-2019-Mord	Leaf rust	RAC875_c37540_583	2B	778230186	2B	769072296	0.00019884	6.883	0.52855	2.24869	748.088	p < 0.00031
Lr-2019-Mord	Leaf rust	Excalibur_c10441_984	2D	624831634	2B	763630872	0.00012494	7.3	0.52003	2.24641	747.288	p < 0.00031
Lr-2019-Mord	Leaf rust	IACX8947	2D	624952145	2D	621964754	0.00012494	7.3	0.52003	2.24641	747.288	p < 0.00031
Lr-2019-Mord	Leaf rust	Excalibur_c224_1383	2D	624952858	2D	621965467	0.00012494	7.3	0.52003	2.24641	747.288	p < 0.00031
Lr-2019-Mord	Leaf rust	wsnp_Ex_c24376_33619527	7B	36162027	7B	33906361	0.00013331	7.262	0.63992	2.1001	746.264	p < 0.00031
Lr-2019-Mord	Leaf rust	wsnp_Ex_c11106_18003332	7B	44013728	7B	41543125	0.00014832	7.147	0.52616	2.24331	747.499	p < 0.00031
Lr-2019-Mord	Leaf rust	wsnp_Ex_c46274_51831129	7B	44502250	7B	42030190	0.00011393	7.383	0.51729	2.24736	747.128	p < 0.00031
Lr-2019-Mord	Leaf rust	GENE-4376_439	7B	44502968	7B	42030908	0.00011393	7.383	0.51729	2.24736	747.128	p < 0.00031
Lr-2019-Mord	Leaf rust	wsnp_Ra_rep_c71101_69119989	7B	44503345	7B	42031285	0.00011393	7.383	0.51729	2.24736	747.128	p < 0.00031
Lr-2019-Mord	Leaf rust	IACX1441	7B	44503936	7B	42031876	0.00011393	7.383	0.51729	2.24736	747.128	p < 0.00031
Lr-2019-Mord	Leaf rust	RAC875_c22886_235	7B	50518063	7B	48072467	0.00013137	7.236	0.43502	2.36601	748.843	p < 0.00031
Lr-2020-Edm	Leaf rust	BS00066006_51	1B	547332148	1B	540726745	0.00022169	6.688	0.80549	1.91193	737.549	p < 0.00031
Lr-2020-Edm	Leaf rust	wsnp_Ra_c18873_27993835	3B	601834249	3B	586737508	0.00018853	6.821	1.01288	1.7624	748.625	p < 0.00031
Lr-2020-Edm	Leaf rust	wsnp_Ex_c65091_63634826	5A	331454313	5B	281640033	0.00025553	6.562	1.0706	1.71548	749.046	p < 0.00031
Lr-2020-Edm	Leaf rust	wsnp_Ra_c46527_52361888	5A	331884318	5D	247613311	0.00025553	6.562	1.0706	1.71548	749.046	p < 0.00031
Lr-2020-Edm	Leaf rust	Kukri_c40734_179	5B	281176164	5B	278106755	0.00025553	6.562	1.0706	1.71548	749.046	p < 0.00031
Lr-2020-Edm	Leaf rust	tplb0050e20_730	5B	284717655	5B	281634822	0.00025553	6.562	1.0706	1.71548	749.046	p < 0.00031
Lr-2020-Mord	Leaf rust	Kukri_c21087_79	2A	758316082	2B	764822952	5.9806e-06	9.921	0.27239	2.40065	737.846	p < 0.00031
Lr-2020-Mord	Leaf rust	Kukri_c693_87	2B	643948286	2B	636112803	0.00018143	6.955	0.4637	2.23723	742.467	p < 0.00031
Lr-2020-Mord	Leaf rust	BobWhite_c18540_351	2B	690898021	2D	570948431	0.00013731	7.167	0.32915	2.40688	743.036	p < 0.00031
Lr-2020-Mord	Leaf rust	BS00022335_51	2B	690909265	2B	682859798	0.00027938	6.55	0.39385	2.33845	743.69	p < 0.00031
Lr-2020-Mord	Leaf rust	Excalibur_c62234_105	2B	771850360	2B	762709794	1.3586e-06	11.201	0.24988	2.39306	735.34	p < 0.00031
Lr-2020-Mord	Leaf rust	BobWhite_c10864_436	2B	772753794	2B	763631845	5.9806e-06	9.921	0.27239	2.40065	737.846	p < 0.00031
Lr-2020-Mord	Leaf rust	TA003025-1611	2B	772753941	2A	753539803	5.9806e-06	9.921	0.27239	2.40065	737.846	p < 0.00031
Lr-2020-Mord	Leaf rust	BS00084417_51	2B	772755069	2B	763633120	5.9806e-06	9.921	0.27239	2.40065	737.846	p < 0.00031
Lr-2020-Mord	Leaf rust	Excalibur_c63327_110	2B	772962976	2B	763842416	5.9806e-06	9.921	0.27239	2.40065	737.846	p < 0.00031
Lr-2020-Mord	Leaf rust	BS00079941_51	2B	773186569	2B	764074052	5.9806e-06	9.921	0.27239	2.40065	737.846	p < 0.00031
Lr-2020-Mord	Leaf rust	IACX8298	2B	773186624	2B	764074107	5.9806e-06	9.921	0.27239	2.40065	737.846	p < 0.00031
Lr-2020-Mord	Leaf rust	BobWhite_c17767_396	2B	773230151	2B	764117633	5.9806e-06	9.921	0.27239	2.40065	737.846	p < 0.00031
Lr-2020-Mord	Leaf rust	Kukri_c25702_948	2B	773943521	2B	764832814	2.0813e-05	8.813	0.26022	2.45441	740.523	p < 0.00031
Lr-2020-Mord	Leaf rust	Kukri_c12117_134	2B	774012953	2B	764902401	5.9806e-06	9.921	0.27239	2.40065	737.846	p < 0.00031
Lr-2020-Mord	Leaf rust	RAC875_c37540_583	2B	778230186	2B	769072296	7.1371e-07	11.689	0.17955	2.48782	735.639	p < 0.00031
Lr-2020-Mord	Leaf rust	wsnp_Ex_c42970_49408553	2D	622545224	2D	619558986	2.2063e-05	8.778	0.28815	2.41419	740.185	p < 0.00031
Lr-2020-Mord	Leaf rust	RAC875_c52856_250	2D	624625220	2A	753420479	6.6633e-05	7.801	0.30142	2.42614	742.128	p < 0.00031
Lr-2020-Mord	Leaf rust	Excalibur_c10441_984	2D	624831634	2B	763630872	8.235e-07	11.598	0.20865	2.44387	735.218	p < 0.00031
Lr-2020-Mord	Leaf rust	BobWhite_s66737_344	2D	624833916	2D	621846255	7.8328e-06	9.58	0.15187	2.60389	741.168	p < 0.00031
Lr-2020-Mord	Leaf rust	IACX8947	2D	624952145	2D	621964754	8.235e-07	11.598	0.20865	2.44387	735.218	p < 0.00031
Lr-2020-Mord	Leaf rust	Excalibur_c224_1383	2D	624952858	2D	621965467	8.235e-07	11.598	0.20865	2.44387	735.218	p < 0.00031
Lr-2020-Mord	Leaf rust	Kukri_c66626_288	3B	310660132	7A	64925333	0.00028863	6.567	0.65476	2.03375	742.549	p < 0.00031
Lr-2020-Mord	Leaf rust	BS00022512_51	3B	702605748	3B	687760585	3.9531e-05	8.303	0.39363	2.28393	740.087	p < 0.00031
Lr-2020-Mord	Leaf rust	CAP8_c674_126	3B	702606277	3B	687761114	3.9531e-05	8.303	0.39363	2.28393	740.087	p < 0.00031
Lr-2020-Mord	Leaf rust	IACX3426	3B	703227258	3B	688385410	3.9531e-05	8.303	0.39363	2.28393	740.087	p < 0.00031
Lr-2020-Mord	Leaf rust	TA003701-0787	3B	704515417	3B	689683997	3.9531e-05	8.303	0.39363	2.28393	740.087	p < 0.00031
Lr-2020-Mord	Leaf rust	Kukri_c55341_290	3D	523408122	3D	522777546	3.9531e-05	8.303	0.39363	2.28393	740.087	p < 0.00031
Lr-2020-Mord	Leaf rust	BobWhite_c37216_572	3D	523409381	3D	522778805	3.9531e-05	8.303	0.39363	2.28393	740.087	p < 0.00031
Lr-2020-Mord	Leaf rust	Lr34_wMAS000004	7D	48955909	7D	47418536	0.0002244	6.791	0.62631	2.05697	742.451	p < 0.00031
Lr-2020-Mord	Leaf rust	RAC875_c8754_1225	4D	41411058	4D	40830371	3.9531e-05	8.303	0.39363	2.28393	740.087	p < 0.00031
Lr-2020-Mord	Leaf rust	JD_c10643_840	5A	342096513	5A	341665876	0.00015843	7.094	0.55007	2.13139	741.689	p < 0.00031
Lr-2020-Mord	Leaf rust	Kukri_c25831_1365	5D	554921768	5D	551020263	3.9531e-05	8.303	0.39363	2.28393	740.087	p < 0.00031
Lr-2020-Mord	Leaf rust	BS00044694_51	7A	68084096	7A	64841136	0.00028863	6.567	0.65476	2.03375	742.549	p < 0.00031
Lr-2020-Mord	Leaf rust	BS00021692_51	7A	68248280	7A	65006400	0.00028863	6.567	0.65476	2.03375	742.549	p < 0.00031
Lr-2020-Mord	Leaf rust	Tdurum_contig85377_141	7A	68249391	7A	65007511	0.00028863	6.567	0.65476	2.03375	742.549	p < 0.00031
Lr-2020-Mord	Leaf rust	BS00098026_51	7A	68394779	7A	65153732	0.00028863	6.567	0.65476	2.03375	742.549	p < 0.00031
Lr-2020-Mord	Leaf rust	BS00102772_51	7A	68568450	7A	65328262	0.00028863	6.567	0.65476	2.03375	742.549	p < 0.00031
Lr-2020-Mord	Leaf rust	Tdurum_contig16445_218	7A	68715672	7A	65476338	0.00028863	6.567	0.65476	2.03375	742.549	p < 0.00031
Lr-2020-Mord	Leaf rust	Tdurum_contig16445_240	7A	68715694	7A	65476360	0.00028863	6.567	0.65476	2.03375	742.549	p < 0.00031
Lr-2020-Mord	Leaf rust	BobWhite_c1085_412	7A	69502228	7D	63436016	0.00028863	6.567	0.65476	2.03375	742.549	p < 0.00031
Lr-2020-Mord	Leaf rust	BS00111112_51	7A	70993178	7A	67671463	0.00017004	7.044	0.6382	2.03695	741.507	p < 0.00031
Lr-2020-Mord	Leaf rust	BobWhite_c47709_141	7A	70993352	7A	67671637	0.00017004	7.044	0.6382	2.03695	741.507	p < 0.00031
Lr-2020-Mord	Leaf rust	Kukri_rep_c109098_132	7A	70993601	7A	67671886	4.6045e-05	8.215	0.59809	2.04476	739.104	p < 0.00031
Lr-2020-Mord	Leaf rust	Kukri_c11325_337	7A	70997818	7A	67676103	1.7208e-05	9.096	0.58588	2.03168	737.234	p < 0.00031
Lr-2020-Mord	Leaf rust	RAC875_c2682_840	7A	71307821	7A	67987865	0.00017004	7.044	0.6382	2.03695	741.507	p < 0.00031
Lr-Comb.	Leaf rust	BS00066006_51	1B	547332148	1B	540726745	3.0269e-05	8.535	0.66051	1.1895	664.638	p < 0.00031
Lr-Comb.	Leaf rust	Excalibur_c40993_1129	1B	547335426	1B	540730023	0.00010196	7.411	0.65798	1.2523	673.129	p < 0.00031
Lr-Comb.	Leaf rust	Excalibur_c21451_352	1B	547487795	1B	540847896	0.00010196	7.411	0.65798	1.2523	673.129	p < 0.00031
Lr-Comb.	Leaf rust	wsnp_BG274294B_Ta_2_3	1B	549647134	1B	543012537	0.00024123	6.629	0.59854	1.33608	675.791	p < 0.00031
Lr-Comb.	Leaf rust	Kukri_c21087_79	2A	758316082	2B	764822952	5.5859e-05	7.928	0.69815	1.23209	679.289	p < 0.00031
Lr-Comb.	Leaf rust	BobWhite_c18540_351	2B	690898021	2D	570948431	0.00023277	6.678	0.78869	1.16851	681.32	p < 0.00031
Lr-Comb.	Leaf rust	Excalibur_c62234_105	2B	771850360	2B	762709794	1.7213e-05	8.966	0.68389	1.22412	677.128	p < 0.00031
Lr-Comb.	Leaf rust	BobWhite_c10864_436	2B	772753794	2B	763631845	5.5859e-05	7.928	0.69815	1.23209	679.289	p < 0.00031
Lr-Comb.	Leaf rust	TA003025-1611	2B	772753941	2A	753539803	5.5859e-05	7.928	0.69815	1.23209	679.289	p < 0.00031
Lr-Comb.	Leaf rust	BS00084417_51	2B	772755069	2B	763633120	5.5859e-05	7.928	0.69815	1.23209	679.289	p < 0.00031
Lr-Comb.	Leaf rust	Excalibur_c63327_110	2B	772962976	2B	763842416	5.5859e-05	7.928	0.69815	1.23209	679.289	p < 0.00031
Lr-Comb.	Leaf rust	BS00079941_51	2B	773186569	2B	764074052	5.5859e-05	7.928	0.69815	1.23209	679.289	p < 0.00031
Lr-Comb.	Leaf rust	IACX8298	2B	773186624	2B	764074107	5.5859e-05	7.928	0.69815	1.23209	679.289	p < 0.00031
Lr-Comb.	Leaf rust	BobWhite_c17767_396	2B	773230151	2B	764117633	5.5859e-05	7.928	0.69815	1.23209	679.289	p < 0.00031
Lr-Comb.	Leaf rust	Kukri_c12117_134	2B	774012953	2B	764902401	5.5859e-05	7.928	0.69815	1.23209	679.289	p < 0.00031
Lr-Comb.	Leaf rust	RAC875_c37540_583	2B	778230186	2B	769072296	5.3351e-05	7.966	0.68892	1.24089	679.343	p < 0.00031
Lr-Comb.	Leaf rust	RAC875_c52856_250	2D	624625220	2A	753420479	0.00015901	6.996	0.69252	1.25853	681.507	p < 0.00031
Lr-Comb.	Leaf rust	Excalibur_c10441_984	2D	624831634	2B	763630872	1.1776e-05	9.293	0.66324	1.23867	676.631	p < 0.00031
Lr-Comb.	Leaf rust	BobWhite_s66737_344	2D	624833916	2D	621846255	0.00021962	6.697	0.65146	1.30944	682.867	p < 0.00031
Lr-Comb.	Leaf rust	IACX8947	2D	624952145	2D	621964754	1.1776e-05	9.293	0.66324	1.23867	676.631	p < 0.00031
Lr-Comb.	Leaf rust	Excalibur_c224_1383	2D	624952858	2D	621965467	1.1776e-05	9.293	0.66324	1.23867	676.631	p < 0.00031
Lr-Comb.	Leaf rust	Ku_c108793_228	3A	51644908	3B	63112422	0.00014593	7.097	0.79453	1.15402	680.463	p < 0.00031
Lr-Comb.	Leaf rust	CAP7_c10624_88	3B	616148037	3B	601120537	0.00027119	6.561	0.89994	1.06896	681.431	p < 0.00031
Lr-Comb.	Leaf rust	wsnp_Ex_c64005_62986957	3B	743632624	3B	728919347	0.00017169	6.96	0.8391	1.11517	680.681	p < 0.00031
Lr-Comb.	Leaf rust	Kukri_rep_c112440_422	3B	743633086	3D	549515358	0.00017169	6.96	0.8391	1.11517	680.681	p < 0.00031
Lr-Comb.	Leaf rust	wsnp_Ex_c11893_19077166	3B	743633965	3B	728920688	0.00017169	6.96	0.8391	1.11517	680.681	p < 0.00031
Lr-Comb.	Leaf rust	RAC875_rep_c69917_755	3B	743922021	3B	729209425	0.00017169	6.96	0.8391	1.11517	680.681	p < 0.00031
Lr-Comb.	Leaf rust	wsnp_Ex_rep_c67645_66305241	3D	550280985	3B	728919659	0.00017169	6.96	0.8391	1.11517	680.681	p < 0.00031
Lr-Comb.	Leaf rust	wsnp_Ex_c65091_63634826	5A	331454313	5B	281640033	0.00013556	7.166	0.81291	1.13515	680.112	p < 0.00031
Lr-Comb.	Leaf rust	wsnp_Ra_c46527_52361888	5A	331884318	5D	247613311	0.00013556	7.166	0.81291	1.13515	680.112	p < 0.00031
Lr-Comb.	Leaf rust	BobWhite_c28958_178	5A	338666459	5B	287797071	0.00020202	6.809	0.80983	1.14558	680.867	p < 0.00031
Lr-Comb.	Leaf rust	Kukri_c40734_179	5B	281176164	5B	278106755	0.00013556	7.166	0.81291	1.13515	680.112	p < 0.00031
Lr-Comb.	Leaf rust	tplb0050e20_730	5B	284717655	5B	281634822	0.00013556	7.166	0.81291	1.13515	680.112	p < 0.00031
Lr-Comb.	Leaf rust	wsnp_Ex_c24376_33619527	7B	36162027	7B	33906361	0.0001933	6.826	0.71039	1.24358	681.694	p < 0.00031
Ls-2016-Edm	Leaf spot	BS00022657_51	2B	140202523	2B	132340683	0.00014447	7.166	0.11817	0.60622	490.82	p < 0.00031
Ls-2016-Edm	Leaf spot	wsnp_Ex_c7246_12443506	2B	140898377	2B	133007173	0.00014447	7.166	0.11817	0.60622	490.82	p < 0.00031
Ls-2016-Edm	Leaf spot	wsnp_Ra_rep_c71290_69343893	3A	373182653	3D	277548449	0.00018607	6.904	0.08776	0.64684	492.02	p < 0.00031
Ls-2016-Edm	Leaf spot	BobWhite_c17386_221	3A	400201775	3A	389129577	0.00018607	6.904	0.08776	0.64684	492.02	p < 0.00031
Ls-2016-Edm	Leaf spot	Excalibur_c18632_1700	6A	597635983	6B	680544265	0.00010343	7.454	0.10583	0.61891	490.453	p < 0.00031
Ls-2016-Edm	Leaf spot	BS00067285_51	7D	593384212	7D	591204218	0.00022936	6.765	0.13874	0.5857	491.501	p < 0.00031
Ls-2017-Edm	Leaf spot	RAC875_s118740_182	1A	297334528	1A	295585184	2.9234e-05	8.657	1.02397	0.95449	680.496	p < 0.00031
Ls-2017-Edm	Leaf spot	RFL_Contig1152_2659	1A	297334650	1A	295585306	0.00011264	7.444	1.10055	0.9156	682.953	p < 0.00031
Ls-2017-Edm	Leaf spot	Kukri_rep_c108194_232	1A	297335857	1A	295586569	6.0634e-05	8.002	1.0627	0.93531	681.905	p < 0.00031
Ls-2017-Edm	Leaf spot	wsnp_Ex_c52086_55808193	1A	595623236	1A	591091169	0.00012953	7.315	1.06068	0.9507	683.256	p < 0.00031
Ls-2017-Edm	Leaf spot	wsnp_Ex_c52086_55808126	1A	595623303	1A	591091236	0.00012953	7.315	1.06068	0.9507	683.256	p < 0.00031
Ls-2017-Edm	Leaf spot	BS00043055_51	2B	19071639	2B	16990725	0.00027049	6.658	0.80622	1.21391	683.416	p < 0.00031
Ls-2017-Edm	Leaf spot	IAAV8700	2B	19465489	2B	17389857	5.0982e-05	8.172	0.80232	1.18399	680.082	p < 0.00031
Ls-2017-Edm	Leaf spot	BS00065556_51	2B	19530481	2B	17456965	1.0912e-05	9.563	0.81349	1.14132	676.809	p < 0.00031
Ls-2017-Edm	Leaf spot	Kukri_c10749_489	2B	663468966	2B	655602146	0.00015421	7.14	0.87053	1.12668	684.579	p < 0.00031
Ls-2018-Edm	Leaf spot	BobWhite_c685_1231	1A	14027876	1A	12590251	0.00028138	6.533	0.09461	1.5884	646.982	p < 0.00031
Ls-2018-Edm	Leaf spot	Kukri_rep_c103282_216	1D	7330572	1D	6899610	4.4941e-06	9.855	1.7076e-05	1.70763	645.246	p < 0.00031
Ls-2018-Edm	Leaf spot	Kukri_c8237_1973	2D	208031638	2D	205891681	1.7385e-05	8.721	0.00233	1.72504	647.566	p < 0.00031
Ls-2018-Edm	Leaf spot	Ku_c2972_1754	3A	10279544	3B	6677392	8.976e-05	7.602	0.14715	1.48901	643.605	p < 0.00031
Ls-2018-Edm	Leaf spot	BS00018120_51	4A	12333950	4A	12402447	6.8631e-06	9.791	0.06526	1.57548	641.039	p < 0.00031
Ls-2018-Edm	Leaf spot	Jagger_c4653_122	4B	348497753	4B	349151892	1.7385e-05	8.721	0.00233	1.72504	647.566	p < 0.00031
Ls-2018-Edm	Leaf spot	IACX5985	4B	567672851	4B	568559535	6.8631e-06	9.791	0.06526	1.57548	641.039	p < 0.00031
Ls-2018-Edm	Leaf spot	wsnp_BE497160D_Ta_2_1	4D	455671910	4D	455488789	0.00017971	6.946	0.10543	1.56322	645.825	p < 0.00031
Ls-2018-Edm	Leaf spot	IACX378	4D	455671967	4D	455488846	0.00017971	6.946	0.10543	1.56322	645.825	p < 0.00031
Ls-2018-Edm	Leaf spot	BS00068013_51	4D	455672798	4D	455489677	0.00017971	6.946	0.10543	1.56322	645.825	p < 0.00031
Ls-2018-Edm	Leaf spot	IAAV5065	4D	455715091	4D	455532169	6.8631e-06	9.791	0.06526	1.57548	641.039	p < 0.00031
Ls-2018-Edm	Leaf spot	Tdurum_contig14090_195	5A	287272246	5B	232638684	2.194e-05	8.849	0.12613	1.49576	641.175	p < 0.00031
Ls-2018-Edm	Leaf spot	CAP7_c11553_123	5A	525784111	5A	525078041	1.7385e-05	8.721	0.00233	1.72504	647.566	p < 0.00031
Ls-2018-Edm	Leaf spot	Kukri_c13590_137	5A	527326889	5A	526619274	1.7385e-05	8.721	0.00233	1.72504	647.566	p < 0.00031
Ls-2018-Edm	Leaf spot	Kukri_c13590_344	5A	527327096	5A	526619481	1.7385e-05	8.721	0.00233	1.72504	647.566	p < 0.00031
Ls-2018-Edm	Leaf spot	RAC875_c15929_925	5A	528619418	5A	527918371	1.7385e-05	8.721	0.00233	1.72504	647.566	p < 0.00031
Ls-2018-Edm	Leaf spot	GENE-3310_647	5A	528620506	5A	527919459	1.7385e-05	8.721	0.00233	1.72504	647.566	p < 0.00031
Ls-2018-Edm	Leaf spot	IAAV2077	5A	528813797	5A	528113991	1.7385e-05	8.721	0.00233	1.72504	647.566	p < 0.00031
Ls-2018-Edm	Leaf spot	IACX5898	5A	528814139	5A	528114333	1.7385e-05	8.721	0.00233	1.72504	647.566	p < 0.00031
Ls-2018-Edm	Leaf spot	BobWhite_c31565_576	5A	528814199	5A	528114393	1.7385e-05	8.721	0.00233	1.72504	647.566	p < 0.00031
Ls-2018-Edm	Leaf spot	BobWhite_c31565_664	5A	528814287	5B	501958219	1.7385e-05	8.721	0.00233	1.72504	647.566	p < 0.00031
Ls-2018-Edm	Leaf spot	Excalibur_c90444_148	5A	528986490	5D	415680684	1.7385e-05	8.721	0.00233	1.72504	647.566	p < 0.00031
Ls-2018-Edm	Leaf spot	RAC875_c60520_164	5A	529279967	5A	528582018	1.7385e-05	8.721	0.00233	1.72504	647.566	p < 0.00031
Ls-2018-Edm	Leaf spot	Kukri_c5281_991	5A	529282353	5A	528584404	1.7385e-05	8.721	0.00233	1.72504	647.566	p < 0.00031
Ls-2018-Edm	Leaf spot	Excalibur_c15931_497	5A	529282508	5A	528584559	1.7385e-05	8.721	0.00233	1.72504	647.566	p < 0.00031
Ls-2018-Edm	Leaf spot	Excalibur_c1371_454	5A	529638473	5A	528941519	1.7385e-05	8.721	0.00233	1.72504	647.566	p < 0.00031
Ls-2018-Edm	Leaf spot	Kukri_c26289_337	5A	529640850	5A	528943896	1.7385e-05	8.721	0.00233	1.72504	647.566	p < 0.00031
Ls-2018-Edm	Leaf spot	wsnp_Ex_c25392_34658803	5A	529787164	5A	529090641	1.7385e-05	8.721	0.00233	1.72504	647.566	p < 0.00031
Ls-2018-Edm	Leaf spot	Kukri_c31301_178	5A	530062852	5B	503326069	1.7385e-05	8.721	0.00233	1.72504	647.566	p < 0.00031
Ls-2018-Edm	Leaf spot	IAAV8169	5A	533698014	5A	533020892	1.7385e-05	8.721	0.00233	1.72504	647.566	p < 0.00031
Ls-2018-Edm	Leaf spot	wsnp_Ex_c9846_16236003	5A	533699398	5A	533022276	1.7385e-05	8.721	0.00233	1.72504	647.566	p < 0.00031
Ls-2018-Edm	Leaf spot	Excalibur_c9846_1996	5A	533700100	5A	533022978	1.7385e-05	8.721	0.00233	1.72504	647.566	p < 0.00031
Ls-2018-Edm	Leaf spot	BobWhite_c20692_90	5A	533967213	5A	533291646	1.7385e-05	8.721	0.00233	1.72504	647.566	p < 0.00031
Ls-2018-Edm	Leaf spot	BobWhite_c7029_58	5A	533967804	5A	533292237	1.7385e-05	8.721	0.00233	1.72504	647.566	p < 0.00031
Ls-2018-Edm	Leaf spot	Excalibur_c4031_1227	5A	533967886	5A	533292319	1.7385e-05	8.721	0.00233	1.72504	647.566	p < 0.00031
Ls-2018-Edm	Leaf spot	RFL_Contig2885_1150	5A	534160328	5A	533485151	1.7385e-05	8.721	0.00233	1.72504	647.566	p < 0.00031
Ls-2018-Edm	Leaf spot	Kukri_rep_c78086_735	5A	534160475	5A	533485298	1.7385e-05	8.721	0.00233	1.72504	647.566	p < 0.00031
Ls-2018-Edm	Leaf spot	Excalibur_c26312_475	5A	534163386	5B	506274194	1.7385e-05	8.721	0.00233	1.72504	647.566	p < 0.00031
Ls-2018-Edm	Leaf spot	Kukri_c55914_256	5A	534164680	5D	418875716	1.7385e-05	8.721	0.00233	1.72504	647.566	p < 0.00031
Ls-2018-Edm	Leaf spot	GENE-3466_653	5A	534613652	5A	533940170	1.7385e-05	8.721	0.00233	1.72504	647.566	p < 0.00031
Ls-2018-Edm	Leaf spot	wsnp_Ku_rep_c70914_70584971	5A	534618191	5B	506510861	1.7385e-05	8.721	0.00233	1.72504	647.566	p < 0.00031
Ls-2018-Edm	Leaf spot	BS00011123_51	5A	534618264	5B	506510934	1.7385e-05	8.721	0.00233	1.72504	647.566	p < 0.00031
Ls-2018-Edm	Leaf spot	wsnp_Ku_c24804_34773820	5A	534619052	5A	533945570	1.7385e-05	8.721	0.00233	1.72504	647.566	p < 0.00031
Ls-2018-Edm	Leaf spot	BS00088187_51	5A	534620735	5B	506513407	1.7385e-05	8.721	0.00233	1.72504	647.566	p < 0.00031
Ls-2018-Edm	Leaf spot	Excalibur_c20664_1596	5A	534915803	5B	506950824	1.7385e-05	8.721	0.00233	1.72504	647.566	p < 0.00031
Ls-2018-Edm	Leaf spot	Kukri_c46126_851	5A	534915993	2D	476479470	1.7385e-05	8.721	0.00233	1.72504	647.566	p < 0.00031
Ls-2018-Edm	Leaf spot	BS00011006_51	5A	534917468	5D	420873762	1.7385e-05	8.721	0.00233	1.72504	647.566	p < 0.00031
Ls-2018-Edm	Leaf spot	IAAV6298	5A	534918388	5A	534246589	1.7385e-05	8.721	0.00233	1.72504	647.566	p < 0.00031
Ls-2018-Edm	Leaf spot	BobWhite_c23569_434	5A	534919261	5A	534247462	1.7385e-05	8.721	0.00233	1.72504	647.566	p < 0.00031
Ls-2018-Edm	Leaf spot	CAP7_c6223_318	5A	535681149	5A	535012789	1.0178e-05	9.16	1.7217e-05	1.72171	646.814	p < 0.00031
Ls-2018-Edm	Leaf spot	BobWhite_c11861_535	5A	535681256	5A	535012896	1.7385e-05	8.721	0.00233	1.72504	647.566	p < 0.00031
Ls-2018-Edm	Leaf spot	tplb0058c02_1053	5A	535681278	5A	535012918	1.0178e-05	9.16	1.7217e-05	1.72171	646.814	p < 0.00031
Ls-2018-Edm	Leaf spot	GENE-3575_1073	5A	535803921	5A	535137781	1.7385e-05	8.721	0.00233	1.72504	647.566	p < 0.00031
Ls-2018-Edm	Leaf spot	Excalibur_c7348_1140	5A	535804503	5D	421533846	3.8083e-05	8.03	1.7446e-05	1.74457	649.333	p < 0.00031
Ls-2018-Edm	Leaf spot	Kukri_c7874_1096	5A	535804773	5A	535138633	1.7385e-05	8.721	0.00233	1.72504	647.566	p < 0.00031
Ls-2018-Edm	Leaf spot	BobWhite_rep_c50822_462	5A	536237945	5B	508795454	1.7385e-05	8.721	0.00233	1.72504	647.566	p < 0.00031
Ls-2018-Edm	Leaf spot	Kukri_c7306_187	5A	536917975	5A	536262949	1.7385e-05	8.721	0.00233	1.72504	647.566	p < 0.00031
Ls-2018-Edm	Leaf spot	wsnp_Ra_c30792_40014791	5A	536919623	5B	510376985	1.7385e-05	8.721	0.00233	1.72504	647.566	p < 0.00031
Ls-2018-Edm	Leaf spot	wsnp_Ex_c19519_28487129	5A	536920460	5A	536265434	1.7385e-05	8.721	0.00233	1.72504	647.566	p < 0.00031
Ls-2018-Edm	Leaf spot	BS00011558_51	5A	537329997	5D	423233075	1.7385e-05	8.721	0.00233	1.72504	647.566	p < 0.00031
Ls-2018-Edm	Leaf spot	CAP7_c2695_75	5A	537330240	5A	536678150	0.00021427	6.649	0.02422	1.71686	650.208	p < 0.00031
Ls-2018-Edm	Leaf spot	Kukri_c100292_597	5A	537448422	5A	536797808	1.7385e-05	8.721	0.00233	1.72504	647.566	p < 0.00031
Ls-2018-Edm	Leaf spot	IAAV5811	5A	537772028	5A	537123867	1.7385e-05	8.721	0.00233	1.72504	647.566	p < 0.00031
Ls-2018-Edm	Leaf spot	BS00066451_51	5A	537772838	5A	537124677	1.7385e-05	8.721	0.00233	1.72504	647.566	p < 0.00031
Ls-2018-Edm	Leaf spot	Excalibur_c19303_516	5A	537775851	5B	511396935	1.7385e-05	8.721	0.00233	1.72504	647.566	p < 0.00031
Ls-2018-Edm	Leaf spot	Kukri_c6148_74	5A	538002902	5A	537354741	1.7385e-05	8.721	0.00233	1.72504	647.566	p < 0.00031
Ls-2018-Edm	Leaf spot	Excalibur_c84332_397	5A	538002966	5A	537354805	1.7385e-05	8.721	0.00233	1.72504	647.566	p < 0.00031
Ls-2018-Edm	Leaf spot	JD_c6094_241	5A	538003310	5A	537355149	1.7385e-05	8.721	0.00233	1.72504	647.566	p < 0.00031
Ls-2018-Edm	Leaf spot	BobWhite_c6094_740	5A	538003809	5A	537355648	1.7385e-05	8.721	0.00233	1.72504	647.566	p < 0.00031
Ls-2018-Edm	Leaf spot	Kukri_c8237_1883	5A	538966760	5A	538320718	1.7385e-05	8.721	0.00233	1.72504	647.566	p < 0.00031
Ls-2018-Edm	Leaf spot	GENE-4139_155	5A	538967615	5A	538321573	1.7385e-05	8.721	0.00233	1.72504	647.566	p < 0.00031
Ls-2018-Edm	Leaf spot	wsnp_Ku_rep_c70220_69775367	5A	538968413	5B	513608076	1.7385e-05	8.721	0.00233	1.72504	647.566	p < 0.00031
Ls-2018-Edm	Leaf spot	wsnp_BE499835B_Ta_2_5	5B	21065514	5B	20832483	0.00019514	6.847	0.08155	1.60408	646.78	p < 0.00031
Ls-2018-Edm	Leaf spot	Tdurum_contig28482_427	5B	70224362	5B	68926803	1.8483e-05	8.886	0.05141	1.61828	643.639	p < 0.00031
Ls-2018-Edm	Leaf spot	BS00103625_51	5B	70438847	5B	69143416	1.8483e-05	8.886	0.05141	1.61828	643.639	p < 0.00031
Ls-2018-Edm	Leaf spot	Kukri_c22925_185	5B	240979456	5B	237810702	7.7269e-06	9.395	1.717e-05	1.71696	646.286	p < 0.00031
Ls-2018-Edm	Leaf spot	wsnp_Ex_c48257_53217539	5B	329717682	5B	326573645	0.0001408	7.191	0.13817	1.50946	644.559	p < 0.00031
Ls-2018-Edm	Leaf spot	BS00064891_51	5B	330053548	5B	326912959	5.4434e-05	8.045	0.13778	1.49398	642.747	p < 0.00031
Ls-2018-Edm	Leaf spot	CAP7_rep_c8461_106	5B	500882147	5B	497905056	1.7385e-05	8.721	0.00233	1.72504	647.566	p < 0.00031
Ls-2018-Edm	Leaf spot	RFL_Contig79_332	5B	500912793	5B	497936902	1.7385e-05	8.721	0.00233	1.72504	647.566	p < 0.00031
Ls-2018-Edm	Leaf spot	Excalibur_c53726_159	5B	501686710	5B	498282138	1.9727e-06	10.552	1.6935e-05	1.69353	643.662	p < 0.00031
Ls-2018-Edm	Leaf spot	IAAV1826	5B	501863702	5B	498883438	1.7385e-05	8.721	0.00233	1.72504	647.566	p < 0.00031
Ls-2018-Edm	Leaf spot	IACX5869	5B	501863702	5B	498883438	1.7385e-05	8.721	0.00233	1.72504	647.566	p < 0.00031
Ls-2018-Edm	Leaf spot	Excalibur_rep_c68017_636	5B	501863917	5B	498883653	1.7385e-05	8.721	0.00233	1.72504	647.566	p < 0.00031
Ls-2018-Edm	Leaf spot	wsnp_Ex_rep_c68017_66762485	5B	501866677	5B	498886413	1.7385e-05	8.721	0.00233	1.72504	647.566	p < 0.00031
Ls-2018-Edm	Leaf spot	wsnp_Ex_c25926_35188395	5B	501867115	5B	498886851	1.7385e-05	8.721	0.00233	1.72504	647.566	p < 0.00031
Ls-2018-Edm	Leaf spot	wsnp_Ex_c25926_35188479	5B	501867115	5B	498886851	1.7385e-05	8.721	0.00233	1.72504	647.566	p < 0.00031
Ls-2018-Edm	Leaf spot	BS00022694_51	5B	501867176	5B	498886912	1.7385e-05	8.721	0.00233	1.72504	647.566	p < 0.00031
Ls-2018-Edm	Leaf spot	Excalibur_rep_c68017_140	5B	501867260	5B	498886996	1.7385e-05	8.721	0.00233	1.72504	647.566	p < 0.00031
Ls-2018-Edm	Leaf spot	Excalibur_c82761_53	5B	502064367	5B	499084514	1.7385e-05	8.721	0.00233	1.72504	647.566	p < 0.00031
Ls-2018-Edm	Leaf spot	Jagger_c750_276	5B	502103826	5B	499124208	1.7385e-05	8.721	0.00233	1.72504	647.566	p < 0.00031
Ls-2018-Edm	Leaf spot	Excalibur_c17046_210	5B	502107360	5B	499127742	1.7385e-05	8.721	0.00233	1.72504	647.566	p < 0.00031
Ls-2018-Edm	Leaf spot	RAC875_c34910_173	5B	502108031	5B	499128413	1.7385e-05	8.721	0.00233	1.72504	647.566	p < 0.00031
Ls-2018-Edm	Leaf spot	Kukri_c13590_206	5B	502147606	5B	499168189	1.7385e-05	8.721	0.00233	1.72504	647.566	p < 0.00031
Ls-2018-Edm	Leaf spot	BS00000648_51	5B	502147744	5B	499168327	0.00014491	7.033	0.0378	1.681	648.445	p < 0.00031
Ls-2018-Edm	Leaf spot	Kukri_c8983_459	5B	502147972	5B	499168555	1.7385e-05	8.721	0.00233	1.72504	647.566	p < 0.00031
Ls-2018-Edm	Leaf spot	BS00010581_51	5B	502364327	5B	499385181	1.7385e-05	8.721	0.00233	1.72504	647.566	p < 0.00031
Ls-2018-Edm	Leaf spot	IACX8389	5B	502364351	5B	499385205	1.7385e-05	8.721	0.00233	1.72504	647.566	p < 0.00031
Ls-2018-Edm	Leaf spot	BS00010837_51	5B	502364364	5B	499385218	1.7385e-05	8.721	0.00233	1.72504	647.566	p < 0.00031
Ls-2018-Edm	Leaf spot	IACX9571	5B	502364514	5B	499385368	1.7385e-05	8.721	0.00233	1.72504	647.566	p < 0.00031
Ls-2018-Edm	Leaf spot	Excalibur_c96334_93	5B	504203685	5B	501238136	1.7385e-05	8.721	0.00233	1.72504	647.566	p < 0.00031
Ls-2018-Edm	Leaf spot	RAC875_c15929_628	5B	504442748	5B	501477542	1.7385e-05	8.721	0.00233	1.72504	647.566	p < 0.00031
Ls-2018-Edm	Leaf spot	RAC875_c33738_654	5B	504443299	5B	501478093	1.7385e-05	8.721	0.00233	1.72504	647.566	p < 0.00031
Ls-2018-Edm	Leaf spot	Kukri_c17876_165	5B	504444748	5B	501479542	1.7385e-05	8.721	0.00233	1.72504	647.566	p < 0.00031
Ls-2018-Edm	Leaf spot	BS00064660_51	5B	504445917	5B	501480711	1.7385e-05	8.721	0.00233	1.72504	647.566	p < 0.00031
Ls-2018-Edm	Leaf spot	BS00064661_51	5B	504445935	5B	501480729	1.7385e-05	8.721	0.00233	1.72504	647.566	p < 0.00031
Ls-2018-Edm	Leaf spot	BS00022040_51	5B	504920680	5B	501957793	1.7385e-05	8.721	0.00233	1.72504	647.566	p < 0.00031
Ls-2018-Edm	Leaf spot	Excalibur_c36525_679	5B	504920961	5B	501958074	1.7385e-05	8.721	0.00233	1.72504	647.566	p < 0.00031
Ls-2018-Edm	Leaf spot	BS00022763_51	5B	504921105	5B	501958218	1.7385e-05	8.721	0.00233	1.72504	647.566	p < 0.00031
Ls-2018-Edm	Leaf spot	BS00093122_51	5B	504921178	5B	501958291	1.7385e-05	8.721	0.00233	1.72504	647.566	p < 0.00031
Ls-2018-Edm	Leaf spot	RAC875_c32587_186	5B	505115236	5B	502152795	1.7385e-05	8.721	0.00233	1.72504	647.566	p < 0.00031
Ls-2018-Edm	Leaf spot	Kukri_c26263_2071	5B	506050547	5B	503093878	1.7385e-05	8.721	0.00233	1.72504	647.566	p < 0.00031
Ls-2018-Edm	Leaf spot	Kukri_c7760_1210	5B	506050987	5B	503094318	1.7385e-05	8.721	0.00233	1.72504	647.566	p < 0.00031
Ls-2018-Edm	Leaf spot	wsnp_Ex_c2224_4171424	5B	506053870	5B	503097201	1.7385e-05	8.721	0.00233	1.72504	647.566	p < 0.00031
Ls-2018-Edm	Leaf spot	wsnp_Ex_c2224_4171319	5B	506053975	5B	503097306	1.7385e-05	8.721	0.00233	1.72504	647.566	p < 0.00031
Ls-2018-Edm	Leaf spot	Kukri_c42165_484	5B	506054529	5B	503097860	1.7385e-05	8.721	0.00233	1.72504	647.566	p < 0.00031
Ls-2018-Edm	Leaf spot	Kukri_c26289_1242	5B	506057135	5B	503100466	1.7385e-05	8.721	0.00233	1.72504	647.566	p < 0.00031
Ls-2018-Edm	Leaf spot	JD_c9613_220	5B	506174446	5B	503218414	1.7385e-05	8.721	0.00233	1.72504	647.566	p < 0.00031
Ls-2018-Edm	Leaf spot	wsnp_JD_c9613_10432955	5B	506174789	5B	503218757	1.7385e-05	8.721	0.00233	1.72504	647.566	p < 0.00031
Ls-2018-Edm	Leaf spot	RAC875_c97163_563	5B	506282312	5D	416599534	1.7385e-05	8.721	0.00233	1.72504	647.566	p < 0.00031
Ls-2018-Edm	Leaf spot	BS00095389_51	5B	508428722	5B	505482007	1.7385e-05	8.721	0.00233	1.72504	647.566	p < 0.00031
Ls-2018-Edm	Leaf spot	Kukri_rep_c72773_882	5B	508429353	5B	505482638	1.7385e-05	8.721	0.00233	1.72504	647.566	p < 0.00031
Ls-2018-Edm	Leaf spot	Excalibur_c9846_1825	5B	508430757	5D	418073065	1.7385e-05	8.721	0.00233	1.72504	647.566	p < 0.00031
Ls-2018-Edm	Leaf spot	Jagger_c6390_111	5B	508762170	5B	505805807	1.7385e-05	8.721	0.00233	1.72504	647.566	p < 0.00031
Ls-2018-Edm	Leaf spot	BobWhite_c20692_123	5B	508762273	5D	418465048	1.7385e-05	8.721	0.00233	1.72504	647.566	p < 0.00031
Ls-2018-Edm	Leaf spot	BS00087678_51	5B	508762726	5B	505806363	1.7385e-05	8.721	0.00233	1.72504	647.566	p < 0.00031
Ls-2018-Edm	Leaf spot	BS00087680_51	5B	508762845	5B	505806482	1.7385e-05	8.721	0.00233	1.72504	647.566	p < 0.00031
Ls-2018-Edm	Leaf spot	wsnp_Ra_c5131_9153817	5B	508763077	5B	505806714	1.7385e-05	8.721	0.00233	1.72504	647.566	p < 0.00031
Ls-2018-Edm	Leaf spot	Kukri_c22631_462	5B	508763719	5B	505807356	1.7385e-05	8.721	0.00233	1.72504	647.566	p < 0.00031
Ls-2018-Edm	Leaf spot	wsnp_Ex_c4031_7293125	5B	508763839	5B	505807476	1.7385e-05	8.721	0.00233	1.72504	647.566	p < 0.00031
Ls-2018-Edm	Leaf spot	IAAV7088	5B	508764471	5D	418467188	1.7385e-05	8.721	0.00233	1.72504	647.566	p < 0.00031
Ls-2018-Edm	Leaf spot	Excalibur_c8675_1638	5B	509224299	5B	506269983	1.7385e-05	8.721	0.00233	1.72504	647.566	p < 0.00031
Ls-2018-Edm	Leaf spot	IAAV4110	5B	509226840	5B	506272548	1.7385e-05	8.721	0.00233	1.72504	647.566	p < 0.00031
Ls-2018-Edm	Leaf spot	wsnp_Ex_c26312_35558700	5B	509228262	5B	506273970	1.7385e-05	8.721	0.00233	1.72504	647.566	p < 0.00031
Ls-2018-Edm	Leaf spot	BobWhite_rep_c61555_115	5B	509228368	5B	506274076	1.7385e-05	8.721	0.00233	1.72504	647.566	p < 0.00031
Ls-2018-Edm	Leaf spot	Kukri_c14245_895	5B	509228788	5B	506274496	1.7385e-05	8.721	0.00233	1.72504	647.566	p < 0.00031
Ls-2018-Edm	Leaf spot	IACX7596	5B	509229799	5B	506275519	1.7385e-05	8.721	0.00233	1.72504	647.566	p < 0.00031
Ls-2018-Edm	Leaf spot	wsnp_Ex_rep_c68033_66780978	5B	509465094	5B	506511990	1.7385e-05	8.721	0.00233	1.72504	647.566	p < 0.00031
Ls-2018-Edm	Leaf spot	BS00088186_51	5B	509466468	5B	506513364	1.7385e-05	8.721	0.00233	1.72504	647.566	p < 0.00031
Ls-2018-Edm	Leaf spot	BS00005092_51	5B	509734496	5B	506781392	1.7385e-05	8.721	0.00233	1.72504	647.566	p < 0.00031
Ls-2018-Edm	Leaf spot	Excalibur_rep_c67473_197	5B	509742841	5B	506789737	1.7385e-05	8.721	0.00233	1.72504	647.566	p < 0.00031
Ls-2018-Edm	Leaf spot	wsnp_JD_c12186_12484832	5B	509743680	5B	506790576	1.7385e-05	8.721	0.00233	1.72504	647.566	p < 0.00031
Ls-2018-Edm	Leaf spot	Excalibur_c44034_1785	5B	509745209	5B	506792105	1.7385e-05	8.721	0.00233	1.72504	647.566	p < 0.00031
Ls-2018-Edm	Leaf spot	wsnp_JD_c23569_20105699	5B	509905876	5B	506952771	1.7385e-05	8.721	0.00233	1.72504	647.566	p < 0.00031
Ls-2018-Edm	Leaf spot	BS00091774_51	5B	509906613	5B	506953508	1.7385e-05	8.721	0.00233	1.72504	647.566	p < 0.00031
Ls-2018-Edm	Leaf spot	wsnp_Ku_rep_c68793_67937879	5B	509909720	5B	506956615	1.7385e-05	8.721	0.00233	1.72504	647.566	p < 0.00031
Ls-2018-Edm	Leaf spot	BS00099648_51	5B	510651133	5B	507588140	1.7385e-05	8.721	0.00233	1.72504	647.566	p < 0.00031
Ls-2018-Edm	Leaf spot	BS00022960_51	5B	510651190	5B	507588197	1.7385e-05	8.721	0.00233	1.72504	647.566	p < 0.00031
Ls-2018-Edm	Leaf spot	CAP11_c3762_122	5B	510767071	5B	507705098	1.0178e-05	9.16	1.7217e-05	1.72171	646.814	p < 0.00031
Ls-2018-Edm	Leaf spot	BobWhite_c11861_557	5B	510767968	5B	507705995	1.0178e-05	9.16	1.7217e-05	1.72171	646.814	p < 0.00031
Ls-2018-Edm	Leaf spot	BobWhite_c43683_388	5B	510993998	5B	507937834	1.7385e-05	8.721	0.00233	1.72504	647.566	p < 0.00031
Ls-2018-Edm	Leaf spot	BS00067615_51	5B	511312468	5B	508256899	1.7385e-05	8.721	0.00233	1.72504	647.566	p < 0.00031
Ls-2018-Edm	Leaf spot	RAC875_c52809_168	5B	511313437	5B	508257868	1.7385e-05	8.721	0.00233	1.72504	647.566	p < 0.00031
Ls-2018-Edm	Leaf spot	Ku_c28054_204	5B	511323038	5B	508267469	1.7385e-05	8.721	0.00233	1.72504	647.566	p < 0.00031
Ls-2018-Edm	Leaf spot	wsnp_Ra_c24619_34168104	5B	511840654	5B	508795462	1.0783e-05	9.11	1.7227e-05	1.72271	646.924	p < 0.00031
Ls-2018-Edm	Leaf spot	BS00068006_51	5B	511842584	5B	508797392	1.7385e-05	8.721	0.00233	1.72504	647.566	p < 0.00031
Ls-2018-Edm	Leaf spot	BS00010033_51	5B	512530434	5B	509487576	0.00012193	7.129	0.02003	1.71643	649.496	p < 0.00031
Ls-2018-Edm	Leaf spot	BS00106102_51	5B	513598084	5B	510558923	1.7385e-05	8.721	0.00233	1.72504	647.566	p < 0.00031
Ls-2018-Edm	Leaf spot	BS00106103_51	5B	513598085	5B	510558924	1.7385e-05	8.721	0.00233	1.72504	647.566	p < 0.00031
Ls-2018-Edm	Leaf spot	Excalibur_c54386_136	5B	513598316	5B	510559155	1.7385e-05	8.721	0.00233	1.72504	647.566	p < 0.00031
Ls-2018-Edm	Leaf spot	Excalibur_c54386_103	5B	513598349	5B	510559188	1.7385e-05	8.721	0.00233	1.72504	647.566	p < 0.00031
Ls-2018-Edm	Leaf spot	RAC875_c27959_117	5B	513743174	5B	510704993	1.7385e-05	8.721	0.00233	1.72504	647.566	p < 0.00031
Ls-2018-Edm	Leaf spot	BobWhite_rep_c57159_360	5B	513767574	5A	536677525	0.00027428	6.44	0.02687	1.71534	650.472	p < 0.00031
Ls-2018-Edm	Leaf spot	tplb0060m15_1174	5B	513767734	5B	510730056	1.7385e-05	8.721	0.00233	1.72504	647.566	p < 0.00031
Ls-2018-Edm	Leaf spot	IAAV6078	5B	513920455	5B	510883043	1.7385e-05	8.721	0.00233	1.72504	647.566	p < 0.00031
Ls-2018-Edm	Leaf spot	wsnp_Ex_c11141_18047244	5B	513921328	5B	510883916	1.7385e-05	8.721	0.00233	1.72504	647.566	p < 0.00031
Ls-2018-Edm	Leaf spot	BobWhite_c4034_965	5B	513921329	5B	510883917	1.7385e-05	8.721	0.00233	1.72504	647.566	p < 0.00031
Ls-2018-Edm	Leaf spot	BobWhite_rep_c50362_537	5B	513922529	5A	536773919	1.7385e-05	8.721	0.00233	1.72504	647.566	p < 0.00031
Ls-2018-Edm	Leaf spot	BS00065697_51	5B	514350488	5B	511307361	1.7385e-05	8.721	0.00233	1.72504	647.566	p < 0.00031
Ls-2018-Edm	Leaf spot	BobWhite_c10247_316	5B	514404126	5B	511361001	1.7385e-05	8.721	0.00233	1.72504	647.566	p < 0.00031
Ls-2018-Edm	Leaf spot	tplb0049b14_1104	5B	514736736	5D	423859639	1.7385e-05	8.721	0.00233	1.72504	647.566	p < 0.00031
Ls-2018-Edm	Leaf spot	tplb0049b14_1542	5B	514737174	5B	511696557	1.7385e-05	8.721	0.00233	1.72504	647.566	p < 0.00031
Ls-2018-Edm	Leaf spot	Excalibur_c11613_213	5B	514737489	5B	511696872	0.00021427	6.649	0.02422	1.71686	650.208	p < 0.00031
Ls-2018-Edm	Leaf spot	BobWhite_c6094_447	5B	514737716	5B	511697099	1.7385e-05	8.721	0.00233	1.72504	647.566	p < 0.00031
Ls-2018-Edm	Leaf spot	Kukri_c36638_192	5B	516023001	5B	512990519	1.7385e-05	8.721	0.00233	1.72504	647.566	p < 0.00031
Ls-2018-Edm	Leaf spot	RAC875_rep_c76630_63	5B	516622246	5B	513590439	1.7385e-05	8.721	0.00233	1.72504	647.566	p < 0.00031
Ls-2018-Edm	Leaf spot	GENE-3155_183	5B	516637488	5B	513605681	1.7385e-05	8.721	0.00233	1.72504	647.566	p < 0.00031
Ls-2018-Edm	Leaf spot	Kukri_rep_c69786_647	5B	516638547	5B	513606740	1.7385e-05	8.721	0.00233	1.72504	647.566	p < 0.00031
Ls-2018-Edm	Leaf spot	Jagger_c2212_120	5B	516639439	5B	513607632	1.7385e-05	8.721	0.00233	1.72504	647.566	p < 0.00031
Ls-2018-Edm	Leaf spot	Kukri_rep_c70220_288	5B	516639738	5B	513607931	1.7385e-05	8.721	0.00233	1.72504	647.566	p < 0.00031
Ls-2018-Edm	Leaf spot	Ku_c15213_388	5B	518342298	5B	515193535	2.408e-05	8.423	1.7366e-05	1.73661	648.46	p < 0.00031
Ls-2018-Edm	Leaf spot	IACX5859	5B	518342621	5B	515193858	2.408e-05	8.423	1.7366e-05	1.73661	648.46	p < 0.00031
Ls-2018-Edm	Leaf spot	RAC875_c7486_1667	5B	518722955	5B	515575395	2.408e-05	8.423	1.7366e-05	1.73661	648.46	p < 0.00031
Ls-2018-Edm	Leaf spot	wsnp_Ra_rep_c70152_67862271	5B	518726331	5B	515578771	2.408e-05	8.423	1.7366e-05	1.73661	648.46	p < 0.00031
Ls-2018-Edm	Leaf spot	Excalibur_rep_c115624_180	5B	518726974	5B	515579414	2.408e-05	8.423	1.7366e-05	1.73661	648.46	p < 0.00031
Ls-2018-Edm	Leaf spot	IACX7890	5D	415879204	5D	413073376	1.7385e-05	8.721	0.00233	1.72504	647.566	p < 0.00031
Ls-2018-Edm	Leaf spot	Excalibur_c27820_1129	5D	416274549	5D	413478319	1.7385e-05	8.721	0.00233	1.72504	647.566	p < 0.00031
Ls-2018-Edm	Leaf spot	CAP11_c5629_55	5D	416556466	5B	498887863	1.7385e-05	8.721	0.00233	1.72504	647.566	p < 0.00031
Ls-2018-Edm	Leaf spot	BS00010886_51	5D	416861094	5D	414067182	1.7385e-05	8.721	0.00233	1.72504	647.566	p < 0.00031
Ls-2018-Edm	Leaf spot	GENE-3639_127	5D	417013492	5D	414220773	1.7385e-05	8.721	0.00233	1.72504	647.566	p < 0.00031
Ls-2018-Edm	Leaf spot	GENE-3206_268	5D	417040354	5D	414247635	1.7385e-05	8.721	0.00233	1.72504	647.566	p < 0.00031
Ls-2018-Edm	Leaf spot	GENE-3206_154	5D	417040464	5D	414247745	1.7385e-05	8.721	0.00233	1.72504	647.566	p < 0.00031
Ls-2018-Edm	Leaf spot	BS00011931_51	5D	418427710	5D	415616855	1.7385e-05	8.721	0.00233	1.72504	647.566	p < 0.00031
Ls-2018-Edm	Leaf spot	wsnp_JD_c7507_8592496	5D	418902643	5D	416070634	1.7385e-05	8.721	0.00233	1.72504	647.566	p < 0.00031
Ls-2018-Edm	Leaf spot	IACX9371	5D	419046194	5D	416215055	1.7385e-05	8.721	0.00233	1.72504	647.566	p < 0.00031
Ls-2018-Edm	Leaf spot	IAAV6876	5D	419046416	5B	503101831	1.7385e-05	8.721	0.00233	1.72504	647.566	p < 0.00031
Ls-2018-Edm	Leaf spot	Kukri_c31301_895	5D	419430783	5D	416599872	1.7385e-05	8.721	0.00233	1.72504	647.566	p < 0.00031
Ls-2018-Edm	Leaf spot	Kukri_c4054_494	5D	420896696	5D	418070854	1.7385e-05	8.721	0.00233	1.72504	647.566	p < 0.00031
Ls-2018-Edm	Leaf spot	JD_c61555_640	5D	421694410	5D	418872850	1.7385e-05	8.721	0.00233	1.72504	647.566	p < 0.00031
Ls-2018-Edm	Leaf spot	BS00100218_51	5D	423514244	5B	506781880	1.7385e-05	8.721	0.00233	1.72504	647.566	p < 0.00031
Ls-2018-Edm	Leaf spot	GENE-3641_40	5D	423683702	5D	420873989	1.7385e-05	8.721	0.00233	1.72504	647.566	p < 0.00031
Ls-2018-Edm	Leaf spot	D_GBB4FNX02JJ4FT_425	5D	424314627	5D	421421754	1.7385e-05	8.721	0.00233	1.72504	647.566	p < 0.00031
Ls-2018-Edm	Leaf spot	BS00067613_51	5D	424729121	5B	508256954	1.7385e-05	8.721	0.00233	1.72504	647.566	p < 0.00031
Ls-2018-Edm	Leaf spot	wsnp_CAP12_c303_168436	5D	425577755	5B	510294760	1.7385e-05	8.721	0.00233	1.72504	647.566	p < 0.00031
Ls-2018-Edm	Leaf spot	wsnp_CAP12_c303_168418	5D	425577773	5B	510294778	1.7385e-05	8.721	0.00233	1.72504	647.566	p < 0.00031
Ls-2018-Edm	Leaf spot	RAC875_c49220_125	5D	425944637	5D	423069473	1.7385e-05	8.721	0.00233	1.72504	647.566	p < 0.00031
Ls-2018-Edm	Leaf spot	Kukri_c26137_300	5D	425946288	5D	423071124	1.7385e-05	8.721	0.00233	1.72504	647.566	p < 0.00031
Ls-2018-Edm	Leaf spot	IAAV3804	5D	425946827	5D	423071663	1.7385e-05	8.721	0.00233	1.72504	647.566	p < 0.00031
Ls-2018-Edm	Leaf spot	BobWhite_c42273_716	5D	426106485	5B	510730133	1.7385e-05	8.721	0.00233	1.72504	647.566	p < 0.00031
Ls-2018-Edm	Leaf spot	D_GBB4FNX02HRJ2H_262	5D	426143502	5D	423270428	1.7385e-05	8.721	0.00233	1.72504	647.566	p < 0.00031
Ls-2018-Edm	Leaf spot	GENE-3155_15	5D	427217065	5D	424350168	1.7385e-05	8.721	0.00233	1.72504	647.566	p < 0.00031
Ls-2018-Edm	Leaf spot	Excalibur_rep_c103557_293	5D	427218632	5D	424351735	1.7385e-05	8.721	0.00233	1.72504	647.566	p < 0.00031
Ls-2018-Edm	Leaf spot	BS00021869_51	5D	427219363	5D	424352466	1.7385e-05	8.721	0.00233	1.72504	647.566	p < 0.00031
Ls-2018-Edm	Leaf spot	Kukri_c6907_175	6B	471577301	3B	736486194	1.7385e-05	8.721	0.00233	1.72504	647.566	p < 0.00031
Ls-2018-Edm	Leaf spot	TA004758-0291	7A	566005379	7A	562098614	0.00027733	6.53	0.08014	1.61255	647.473	p < 0.00031
Ls-2018-Edm	Leaf spot	Ku_c5281_344	7A	700809809	7A	696022788	1.7385e-05	8.721	0.00233	1.72504	647.566	p < 0.00031
Ls-2018-Edm	Leaf spot	GENE-4579_458	7A	700817551	7A	696030980	1.7385e-05	8.721	0.00233	1.72504	647.566	p < 0.00031
Ls-2018-Edm	Leaf spot	Excalibur_c29592_519	7D	10966502	1A	77790893	1.7385e-05	8.721	0.00233	1.72504	647.566	p < 0.00031
Ls-2018-Edm	Leaf spot	D_contig75414_310	7D	29309703	7D	28030534	0.00015716	7.137	0.24045	1.37878	644.163	p < 0.00031
Ls-Comb.	Leaf spot	Excalibur_c16851_835	1B	18203933	1B	17383825	0.00028678	6.564	0.19839	0.40793	458.578	p < 0.00031
Ls-Comb.	Leaf spot	Excalibur_rep_c110303_320	2A	19019241	2A	15954221	6.4229e-05	7.919	0.20661	0.39121	455.824	p < 0.00031
Ls-Comb.	Leaf spot	Ra_c58279_684	2A	45928136	2B	63292332	0.00026105	6.656	0.21358	0.39283	458.498	p < 0.00031
Ls-Comb.	Leaf spot	Ra_c58279_702	2A	45928154	2A	41232514	0.00026105	6.656	0.21358	0.39283	458.498	p < 0.00031
Ls-Comb.	Leaf spot	wsnp_Ex_c5412_9565527	2A	45928218	2A	41232578	0.00026105	6.656	0.21358	0.39283	458.498	p < 0.00031
Ls-Comb.	Leaf spot	wsnp_Ex_c5412_9564550	2A	45931727	2A	41236089	0.00026105	6.656	0.21358	0.39283	458.498	p < 0.00031
Ls-Comb.	Leaf spot	wsnp_Ex_c5412_9564478	2A	45931779	2A	41236141	0.00026105	6.656	0.21358	0.39283	458.498	p < 0.00031
Ls-Comb.	Leaf spot	wsnp_Ex_c5412_9564346	2A	45932241	2A	41236603	0.00026105	6.656	0.21358	0.39283	458.498	p < 0.00031
Ls-Comb.	Leaf spot	BS00065556_51	2B	19530481	2B	17456965	0.0001074	7.431	0.12171	0.49008	456.154	p < 0.00031
Ls-Comb.	Leaf spot	Tdurum_contig16797_148	3B	557835101	3B	542644180	0.00026327	6.642	0.20035	0.4055	458.506	p < 0.00031
Ls-Comb.	Leaf spot	wsnp_Ku_c13640_21686670	4A	580845356	4A	581940789	0.00012705	7.273	0.15765	0.4457	457.702	p < 0.00031
Ls-Comb.	Leaf spot	CAP7_c10430_216	7D	266720824	7D	264753580	0.00025978	6.643	0.17933	0.42662	458.786	p < 0.00031
Cb-2016-Edm	Common bunt	Kukri_c42354_263	1B	643202503	1B	635980150	0.0002489	6.718	0.68745	0.61428	599.402	p < 0.00031
Cb-2016-Edm	Common bunt	BS00022176_51	1B	643977807	1B	636737918	0.0002489	6.718	0.68745	0.61428	599.402	p < 0.00031
Cb-2016-Edm	Common bunt	Excalibur_rep_c110303_320	2A	19019241	2A	15954221	3.0022e-05	8.616	0.5976	0.66601	596.349	p < 0.00031
Cb-2016-Edm	Common bunt	BS00057059_51	2A	733284153	2A	729287961	0.00022268	6.814	0.65339	0.64128	599.82	p < 0.00031
Cb-2016-Edm	Common bunt	BS00057060_51	2A	733284550	2A	729288358	0.00022268	6.814	0.65339	0.64128	599.82	p < 0.00031
Cb-2016-Edm	Common bunt	BS00024921_51	2A	737067105	2A	733091224	0.00029278	6.571	0.69706	0.60836	600.245	p < 0.00031
Cb-2016-Edm	Common bunt	BS00067907_51	2B	730754041	2B	722346959	0.00017501	7.032	0.64688	0.64398	599.376	p < 0.00031
Cb-2016-Edm	Common bunt	BS00064055_51	2B	811949935	2B	774831009	5.1401e-05	8.143	0.67421	0.60686	597.255	p < 0.00031
Cb-2016-Edm	Common bunt	BS00090129_51	2D	422735203	2A	569584880	0.00025687	6.684	0.64169	0.65296	600.313	p < 0.00031
Cb-2016-Edm	Common bunt	Ku_c2972_1754	3A	10279544	3B	6677392	1.2084e-06	11.497	0.68963	0.55231	590	p < 0.00031
Cb-2016-Edm	Common bunt	BobWhite_c23392_63	3A	13799953	3A	13497263	8.9524e-05	7.633	0.60761	0.67018	598.425	p < 0.00031
Cb-2016-Edm	Common bunt	Excalibur_c15928_409	3A	648459705	3A	648262409	0.00022478	6.814	0.72425	0.58376	600.226	p < 0.00031
Cb-2016-Edm	Common bunt	Kukri_c1526_616	3A	663354267	3A	663178203	0.00022511	6.804	0.64652	0.64727	599.95	p < 0.00031
Cb-2016-Edm	Common bunt	JD_c1752_970	3A	671290927	3D	535782385	5.1054e-06	10.193	0.56167	0.67734	593.327	p < 0.00031
Cb-2016-Edm	Common bunt	Kukri_c96774_58	3A	671295531	3D	535786610	0.000128	7.309	0.60739	0.67468	599.203	p < 0.00031
Cb-2016-Edm	Common bunt	BS00018120_51	4A	12333950	4A	12402447	4.9061e-05	8.148	0.47836	0.78676	598.709	p < 0.00031
Cb-2016-Edm	Common bunt	IACX5985	4B	567672851	4B	568559535	4.9061e-05	8.148	0.47836	0.78676	598.709	p < 0.00031
Cb-2016-Edm	Common bunt	wsnp_BE497160D_Ta_2_1	4D	455671910	4D	455488789	3.2072e-05	8.535	0.50043	0.75888	597.49	p < 0.00031
Cb-2016-Edm	Common bunt	IACX378	4D	455671967	4D	455488846	3.2072e-05	8.535	0.50043	0.75888	597.49	p < 0.00031
Cb-2016-Edm	Common bunt	BS00068013_51	4D	455672798	4D	455489677	3.2072e-05	8.535	0.50043	0.75888	597.49	p < 0.00031
Cb-2016-Edm	Common bunt	IAAV5065	4D	455715091	4D	455532169	4.9061e-05	8.148	0.47836	0.78676	598.709	p < 0.00031
Cb-2016-Edm	Common bunt	Kukri_c55310_94	5A	635613119	5A	633844049	0.00028266	6.64	0.72579	0.59049	597.017	p < 0.00031
Cb-2016-Edm	Common bunt	Kukri_rep_c72756_155	5A	635613141	5A	633844071	0.00028266	6.64	0.72579	0.59049	597.017	p < 0.00031
Cb-2016-Edm	Common bunt	Tdurum_contig28482_427	5B	70224362	5B	68926803	0.00016144	7.104	0.64047	0.64851	599.073	p < 0.00031
Cb-2016-Edm	Common bunt	BS00103625_51	5B	70438847	5B	69143416	0.00016144	7.104	0.64047	0.64851	599.073	p < 0.00031
Cb-2016-Edm	Common bunt	wsnp_Ex_c13485_21225504	5B	566210165	5B	562970366	2.2679e-05	8.911	0.59067	0.67422	592.469	p < 0.00031
Cb-2016-Edm	Common bunt	BobWhite_c21345_121	5D	565867455	5D	558949757	1.4557e-05	9.261	0.57774	0.67522	595.121	p < 0.00031
Cb-2016-Edm	Common bunt	D_contig17056_55	6D	7431984	6D	6966722	5.8733e-05	8.045	0.87085	0.46481	598.871	p < 0.00031
Cb-2017-Edm	Common bunt	wsnp_Ku_c1818_3557408	1A	4383342	1A	3390351	0.00017277	7.086	1.05844	1.97848	766.267	p < 0.00031
Cb-2017-Edm	Common bunt	Excalibur_c2868_1808	1A	8532071	1A	7184252	0.00010389	7.538	0.86405	2.16205	765.465	p < 0.00031
Cb-2017-Edm	Common bunt	wsnp_Ku_c17177_26216230	1A	13371025	1A	11942481	6.2225e-05	8.004	0.87755	2.13184	764.686	p < 0.00031
Cb-2017-Edm	Common bunt	TA003589-0518	3A	8941423	3A	8865693	9.891e-05	7.601	1.22388	1.80867	765.359	p < 0.00031
Cb-2017-Edm	Common bunt	wsnp_Ku_c18538_27857915	3B	437815581	3B	422524722	0.0002188	6.87	1.0361	2.00732	766.539	p < 0.00031
Cb-2017-Edm	Common bunt	IAAV8536	3B	437816443	3B	422523860	7.1963e-05	7.884	1.08346	1.92856	764.345	p < 0.00031
Cb-2017-Edm	Common bunt	Ku_c11466_1414	3B	437816593	3B	422523710	7.1963e-05	7.884	1.08346	1.92856	764.345	p < 0.00031
Cb-2017-Edm	Common bunt	Kukri_c35451_437	3B	569276445	3B	554034002	5.6847e-05	8.087	0.88716	2.11884	764.224	p < 0.00031
Cb-2017-Edm	Common bunt	Excalibur_rep_c110294_82	3B	569277213	3B	554034769	3.0844e-05	8.636	0.84332	2.14733	763.229	p < 0.00031
Cb-2017-Edm	Common bunt	RAC875_rep_c104133_1757	3B	569277293	3B	761578016	5.6847e-05	8.087	0.88716	2.11884	764.224	p < 0.00031
Cb-2017-Edm	Common bunt	Kukri_c23354_369	3B	830519902	Ukn	42186204	0.00020924	6.913	1.09626	1.94781	766.574	p < 0.00031
Cb-2017-Edm	Common bunt	BS00023151_51	4A	605473189	4A	606586697	3.5905e-05	8.49	0.74297	2.26489	764.344	p < 0.00031
Cb-2017-Edm	Common bunt	RAC875_c35819_165	4A	650484966	4A	649809076	0.00018859	7.019	1.41812	1.66169	767.066	p < 0.00031
Cb-2017-Edm	Common bunt	TA006348-0950	4A	650572049	4A	649897006	0.00018859	7.019	1.41812	1.66169	767.066	p < 0.00031
Cb-2017-Edm	Common bunt	BS00064403_51	4B	448106775	4B	449126898	0.0001025	7.559	1.01728	2.00326	765.336	p < 0.00031
Cb-2017-Edm	Common bunt	wsnp_Ku_c11466_18716865	6A	235843930	2A	499391540	6.1683e-05	8.023	1.07125	1.93569	764.088	p < 0.00031
Cb-2017-Edm	Common bunt	D_contig17056_55	6D	7431984	6D	6966722	4.5769e-07	12.44	1.56083	1.38959	756.535	p < 0.00031
Cb-2017-Edm	Common bunt	RAC875_c18129_2491	7A	15774259	7A	15085981	0.00023178	6.827	1.2889	1.77601	767.218	p < 0.00031
Cb-2017-Edm	Common bunt	D_contig75414_310	7D	29309703	7D	28030534	7.9011e-05	7.794	0.98655	2.02611	765.054	p < 0.00031
Cb-Comb.	Common bunt	wsnp_Ku_c1818_3557408	1A	4383342	1A	3390351	0.00019881	6.944	0.81144	0.95565	660.83	p < 0.00031
Cb-Comb.	Common bunt	wsnp_Ku_c17177_26216230	1A	13371025	1A	11942481	0.00016122	7.133	0.7852	0.9761	660.48	p < 0.00031
Cb-Comb.	Common bunt	BobWhite_c685_1231	1A	14027876	1A	12590251	0.00014234	7.27	1.23818	0.62169	660.941	p < 0.00031
Cb-Comb.	Common bunt	CAP11_c6406_71	1A	556873095	1A	554889518	0.00011897	7.415	0.86519	0.8997	659.389	p < 0.00031
Cb-Comb.	Common bunt	tplb0053e09_1284	1B	645251547	1B	638015656	0.00029907	6.577	0.8746	0.90662	661.176	p < 0.00031
Cb-Comb.	Common bunt	Kukri_rep_c68693_86	1D	10669243	1D	10259677	0.0002876	6.608	0.80488	0.96777	661.445	p < 0.00031
Cb-Comb.	Common bunt	BS00012463_51	2B	811019075	2B	795065724	0.00017649	7.061	0.93384	0.84827	660.495	p < 0.00031
Cb-Comb.	Common bunt	Ku_c2972_1754	3A	10279544	3B	6677392	4.6345e-06	10.356	1.02471	0.72091	653.516	p < 0.00031
Cb-Comb.	Common bunt	JD_c1752_970	3A	671290927	3D	535782385	3.3924e-05	8.548	0.80753	0.92985	657.586	p < 0.00031
Cb-Comb.	Common bunt	Kukri_c13045_302	5D	244100829	5D	241250946	0.00019804	6.961	1.02741	0.77591	660.632	p < 0.00031
Cb-Comb.	Common bunt	BobWhite_c21345_121	5D	565867455	5D	558949757	0.00028785	6.609	0.8264	0.94834	661.49	p < 0.00031
Cb-Comb.	Common bunt	D_contig17056_55	6D	7431984	6D	6966722	2.6316e-09	16.891	1.38919	0.39232	643.615	p < 0.00031
Cb-Comb.	Common bunt	RAC875_c18129_2491	7A	15774259	7A	15085981	0.00025807	6.721	1.0603	0.75507	661.535	p < 0.00031

## Sheet: Table S6B
B) Summary of significant marker-trait associations by markers
Marker	Comment based on environments	Cb-Comb.	Cb-2016-Edm	Cb-2017-Edm	Cb-count	Lr-Comb.	Lr-2017-Edm	Lr-2019-Mord	Lr-2020-Edm	Lr-2020-Mord	Lr-count	Ls-Comb.	Ls-2016-Edm	Ls-2017-Edm	Ls-2018-Edm	Ls-count	Yr-Comb.	Yr-2016-Edm	Yr-2016-Leth	Yr-2017-Leth	Yr-2018-Cres	Yr-2018-Edm	Yr-2018-Leth	Yr-2019-Leth	Yr-2020-Cres	Yr-2020-Edm	Yr-count	Count of all traits	Traits
BobWhite_c10015_641	Env. Specific																									10.209	1	1	Yr
BobWhite_c10247_316	Env. Specific														8.721	1												1	Ls
BobWhite_c1085_412	Env. Specific									6.567	1																	1	Lr
BobWhite_c10864_436	Lr overall env.					7.928				9.921	2																	2	Lr
BobWhite_c11861_535	Env. Specific														8.721	1												1	Ls
BobWhite_c11861_557	Env. Specific														9.16	1												1	Ls
BobWhite_c16529_703	Env. Specific																									9.39	1	1	Yr
BobWhite_c17386_221	Env. Specific												6.904			1												1	Ls
BobWhite_c17767_396	Lr overall env.					7.928				9.921	2																	2	Lr
BobWhite_c18540_351	Lr overall env.					6.678				7.167	2																	2	Lr
BobWhite_c20692_123	Env. Specific														8.721	1												1	Ls
BobWhite_c20692_90	Env. Specific														8.721	1												1	Ls
BobWhite_c21345_121	Cb overall env.	6.609	9.261		2																							2	Cb
BobWhite_c23392_63	Env. Specific		7.633		1																							1	Cb
BobWhite_c23569_434	Env. Specific														8.721	1												1	Ls
BobWhite_c2532_966	Env. Specific																									10.209	1	1	Yr
BobWhite_c28958_178	Lr overall env.					6.809					1																	1	Lr
BobWhite_c31565_576	Env. Specific														8.721	1												1	Ls
BobWhite_c31565_664	Env. Specific														8.721	1												1	Ls
BobWhite_c33069_114	Env. Specific																			10.405							1	1	Yr
BobWhite_c37216_572	Env. Specific									8.303	1																	1	Lr
BobWhite_c4034_965	Env. Specific														8.721	1												1	Ls
BobWhite_c40479_283	Env. Specific																					8.991					1	1	Yr
BobWhite_c42273_716	Env. Specific														8.721	1												1	Ls
BobWhite_c43683_388	Env. Specific														8.721	1												1	Ls
BobWhite_c47709_141	Env. Specific									7.044	1																	1	Lr
BobWhite_c6094_447	Env. Specific														8.721	1												1	Ls
BobWhite_c6094_740	Env. Specific														8.721	1												1	Ls
BobWhite_c685_1231	Cb overall env.	7.27			1										6.533	1												2	Cb & Ls
BobWhite_c7029_58	Env. Specific														8.721	1												1	Ls
BobWhite_rep_c50362_537	Env. Specific														8.721	1												1	Ls
BobWhite_rep_c50822_462	Env. Specific														8.721	1												1	Ls
BobWhite_rep_c57159_360	Env. Specific														6.44	1												1	Ls
BobWhite_rep_c61555_115	Env. Specific														8.721	1												1	Ls
BobWhite_rep_c66800_54	Env. Specific																									7.036	1	1	Yr
BobWhite_s66737_344	Lr overall env.					6.697				9.58	2																	2	Lr
BS00000648_51	Env. Specific														7.033	1												1	Ls
BS00003622_51	Env. Specific																				7.382						1	1	Yr
BS00003672_51	Env. Specific																									6.635	1	1	Yr
BS00003748_51	Env. Specific																				6.722						1	1	Yr
BS00005092_51	Env. Specific														8.721	1												1	Ls
BS00005206_51	Env. Specific																									8.714	1	1	Yr
BS00009825_51	Env. Specific																				6.756						1	1	Yr
BS00010033_51	Env. Specific														7.129	1												1	Ls
BS00010581_51	Env. Specific														8.721	1												1	Ls
BS00010837_51	Env. Specific														8.721	1												1	Ls
BS00010886_51	Env. Specific														8.721	1												1	Ls
BS00011006_51	Env. Specific														8.721	1												1	Ls
BS00011123_51	Env. Specific														8.721	1												1	Ls
BS00011558_51	Env. Specific														8.721	1												1	Ls
BS00011931_51	Env. Specific														8.721	1												1	Ls
BS00012463_51	Cb overall env.	7.061			1																							1	Cb
BS00018120_51	Env. Specific		8.148		1										9.791	1												2	Cb & Ls
BS00021692_51	Env. Specific									6.567	1																	1	Lr
BS00021869_51	Env. Specific														8.721	1												1	Ls
BS00022040_51	Env. Specific														8.721	1												1	Ls
BS00022176_51	Env. Specific		6.718		1																							1	Cb
BS00022335_51	Env. Specific									6.55	1																	1	Lr
BS00022512_51	Env. Specific									8.303	1																	1	Lr
BS00022657_51	Env. Specific												7.166			1												1	Ls
BS00022665_51	Env. Specific																	9.555									1	1	Yr
BS00022694_51	Env. Specific														8.721	1												1	Ls
BS00022763_51	Env. Specific														8.721	1												1	Ls
BS00022824_51	Env. Specific																							7.111			1	1	Yr
BS00022960_51	Env. Specific														8.721	1												1	Ls
BS00023151_51	Env. Specific			8.49	1																							1	Cb
BS00024921_51	Env. Specific		6.571		1																							1	Cb
BS00036168_51	Env. Specific																				7.381						1	1	Yr
BS00038643_51	Env. Specific						7.828				1									8.302							1	2	Lr & Yr
BS00041742_51	Env. Specific						6.629				1																	1	Lr
BS00043055_51	Env. Specific													6.658		1												1	Ls
BS00044694_51	Env. Specific									6.567	1																	1	Lr
BS00048610_51	Env. Specific						7.445				1																	1	Lr
BS00057059_51	Env. Specific		6.814		1																							1	Cb
BS00057060_51	Env. Specific		6.814		1																							1	Cb
BS00062956_51	Env. Specific																				6.756						1	1	Yr
BS00064055_51	Env. Specific		8.143		1																							1	Cb
BS00064403_51	Env. Specific			7.559	1																							1	Cb
BS00064660_51	Env. Specific														8.721	1												1	Ls
BS00064661_51	Env. Specific														8.721	1												1	Ls
BS00064891_51	Env. Specific														8.045	1												1	Ls
BS00065556_51	Ls overall env.											7.431		9.563		2												1	Ls
BS00065697_51	Env. Specific														8.721	1												1	Ls
BS00066006_51	Lr overall env.					8.535	9.116		6.688		3									7.732		7.142		7.327	7.125		4	7	Lr & Yr
BS00066451_51	Env. Specific														8.721	1												1	Ls
BS00067285_51	Env. Specific												6.765			1												1	Ls
BS00067613_51	Env. Specific														8.721	1												1	Ls
BS00067615_51	Env. Specific														8.721	1												1	Ls
BS00067907_51	Env. Specific		7.032		1																							1	Cb
BS00068006_51	Env. Specific														8.721	1												1	Ls
BS00068013_51	Env. Specific		8.535		1										6.946	1												2	Cb & Ls
BS00071424_51	Env. Specific																			6.749							1	1	Yr
BS00079941_51	Lr overall env.					7.928				9.921	2																	2	Lr
BS00084417_51	Lr overall env.					7.928				9.921	2																	2	Lr
BS00086533_51	Yr overall env.																7.432	11.034			6.535						3	3	Yr
BS00087678_51	Env. Specific														8.721	1												1	Ls
BS00087680_51	Env. Specific														8.721	1												1	Ls
BS00088186_51	Env. Specific														8.721	1												1	Ls
BS00088187_51	Env. Specific														8.721	1												1	Ls
BS00089457_51	Env. Specific																									10.209	1	1	Yr
BS00090129_51	Env. Specific		6.684		1																							1	Cb
BS00091774_51	Env. Specific														8.721	1												1	Ls
BS00093122_51	Env. Specific														8.721	1												1	Ls
BS00095389_51	Env. Specific														8.721	1												1	Ls
BS00098026_51	Env. Specific									6.567	1																	1	Lr
BS00099648_51	Env. Specific														8.721	1												1	Ls
BS00100218_51	Env. Specific														8.721	1												1	Ls
BS00102772_51	Env. Specific									6.567	1																	1	Lr
BS00103625_51	Env. Specific		7.104		1										8.886	1												2	Cb & Ls
BS00106102_51	Env. Specific														8.721	1												1	Ls
BS00106103_51	Env. Specific														8.721	1												1	Ls
BS00106641_51	Env. Specific																							6.818			1	1	Yr
BS00110397_51	Env. Specific																		7.088								1	1	Yr
BS00111112_51	Env. Specific									7.044	1																	1	Lr
CAP11_c3762_122	Env. Specific														9.16	1												1	Ls
CAP11_c5629_55	Env. Specific														8.721	1												1	Ls
CAP11_c6406_71	Cb overall env.	7.415			1																							1	Cb
CAP12_c1129_220	Env. Specific																			7.362							1	1	Yr
CAP7_c10430_216	Ls overall env.											6.643				1												1	Ls
CAP7_c10624_88	Lr overall env.					6.561	7.285				2																	2	Lr
CAP7_c11553_123	Env. Specific														8.721	1												1	Ls
CAP7_c1383_548	Env. Specific																									7.944	1	1	Yr
CAP7_c1625_317	Env. Specific																			6.829							1	1	Yr
CAP7_c2695_75	Env. Specific														6.649	1												1	Ls
CAP7_c6223_318	Env. Specific														9.16	1												1	Ls
CAP7_rep_c8461_106	Env. Specific														8.721	1												1	Ls
CAP8_c6142_206	Env. Specific																									7.805	1	1	Yr
CAP8_c674_126	Env. Specific									8.303	1																	1	Lr
D_contig17056_55	Cb overall env.	16.891	8.045	12.44	3																							3	Cb
D_contig35094_423	Env. Specific																									8.323	1	1	Yr
D_contig75414_310	Env. Specific			7.794	1										7.137	1												2	Cb & Ls
D_GBB4FNX02HRJ2H_262	Env. Specific														8.721	1												1	Ls
D_GBB4FNX02JJ4FT_425	Env. Specific														8.721	1												1	Ls
D_GCE8AKX01C0776_247	Env. Specific						6.452				1																	1	Lr
D_GDS7LZN02FSYZC_227	Env. Specific																					8.587					1	1	Yr
Ex_c104555_477	Env. Specific																									9.982	1	1	Yr
Ex_c1421_1813	Env. Specific																									9.714	1	1	Yr
Ex_c21793_378	Env. Specific																									7.003	1	1	Yr
Ex_c21793_457	Env. Specific																									7.003	1	1	Yr
Ex_c32172_1677	Env. Specific																									6.802	1	1	Yr
Ex_c68445_724	Env. Specific																									6.802	1	1	Yr
Excalibur_c10441_984	Lr overall env.					9.293		7.3		11.598	3																	3	Lr
Excalibur_c11045_236	Yr overall env.																7.355	7.332									2	2	Yr
Excalibur_c11398_971	Env. Specific																									6.966	1	1	Yr
Excalibur_c11613_213	Env. Specific														6.649	1												1	Ls
Excalibur_c13094_523	Env. Specific						7.061				1																	1	Lr
Excalibur_c1371_454	Env. Specific														8.721	1												1	Ls
Excalibur_c15928_409	Env. Specific		6.814		1																							1	Cb
Excalibur_c15931_497	Env. Specific														8.721	1												1	Ls
Excalibur_c16154_246	Env. Specific																					7.607					1	1	Yr
Excalibur_c16851_835	Ls overall env.											6.564				1												1	Ls
Excalibur_c17046_210	Env. Specific														8.721	1												1	Ls
Excalibur_c18417_241	Env. Specific																									6.802	1	1	Yr
Excalibur_c18632_1700	Env. Specific												7.454			1												1	Ls
Excalibur_c19303_516	Env. Specific														8.721	1												1	Ls
Excalibur_c19908_459	Env. Specific																	7.491									1	1	Yr
Excalibur_c20664_1596	Env. Specific														8.721	1												1	Ls
Excalibur_c21451_352	Lr overall env.					7.411	7.952				2									7.313							1	3	Lr & Yr
Excalibur_c224_1383	Lr overall env.					9.293		7.3		11.598	3																	3	Lr
Excalibur_c2311_114	Env. Specific																									8.253	1	1	Yr
Excalibur_c26312_475	Env. Specific														8.721	1												1	Ls
Excalibur_c26571_507	Env. Specific																	6.702									1	1	Yr
Excalibur_c27210_183	Env. Specific																									10.209	1	1	Yr
Excalibur_c27820_1129	Env. Specific														8.721	1												1	Ls
Excalibur_c28425_386	Env. Specific																									9.433	1	1	Yr
Excalibur_c2868_1808	Env. Specific			7.538	1																							1	Cb
Excalibur_c29592_519	Env. Specific														8.721	1												1	Ls
Excalibur_c3439_534	Env. Specific																									9.772	1	1	Yr
Excalibur_c35631_1020	Env. Specific																		8.131								1	1	Yr
Excalibur_c36525_679	Env. Specific														8.721	1												1	Ls
Excalibur_c4031_1227	Env. Specific														8.721	1												1	Ls
Excalibur_c40993_1129	Lr overall env.					7.411	7.952				2									7.313							1	3	Lr & Yr
Excalibur_c41771_990	Env. Specific																			7.196							1	1	Yr
Excalibur_c42815_713	Env. Specific																									7.003	1	1	Yr
Excalibur_c44034_1785	Env. Specific														8.721	1												1	Ls
Excalibur_c4748_360	Env. Specific																	6.81									1	1	Yr
Excalibur_c49297_159	Yr overall env.																8.272		7.563		7.972						3	3	Yr
Excalibur_c53726_159	Env. Specific														10.552	1												1	Ls
Excalibur_c54386_103	Env. Specific														8.721	1												1	Ls
Excalibur_c54386_136	Env. Specific														8.721	1												1	Ls
Excalibur_c62234_105	Lr overall env.					8.966		6.949		11.201	3																	3	Lr
Excalibur_c63327_110	Lr overall env.					7.928				9.921	2																	2	Lr
Excalibur_c65533_414	Env. Specific																									8.964	1	1	Yr
Excalibur_c7348_1140	Env. Specific														8.03	1												1	Ls
Excalibur_c82761_53	Env. Specific														8.721	1												1	Ls
Excalibur_c84332_397	Env. Specific														8.721	1												1	Ls
Excalibur_c8613_1266	Env. Specific						7.249				1									8.877							1	2	Lr & Yr
Excalibur_c8675_1638	Env. Specific														8.721	1												1	Ls
Excalibur_c90444_148	Env. Specific														8.721	1												1	Ls
Excalibur_c96334_93	Env. Specific														8.721	1												1	Ls
Excalibur_c96921_206	Env. Specific																									8.95	1	1	Yr
Excalibur_c9846_1825	Env. Specific														8.721	1												1	Ls
Excalibur_c9846_1996	Env. Specific														8.721	1												1	Ls
Excalibur_rep_c103557_293	Env. Specific														8.721	1												1	Ls
Excalibur_rep_c110294_82	Env. Specific			8.636	1																							1	Cb
Excalibur_rep_c110303_320	Ls overall env.		8.616		1							7.919				1												2	Cb & Ls
Excalibur_rep_c111831_114	Env. Specific																			7.259							1	1	Yr
Excalibur_rep_c115624_180	Env. Specific														8.423	1												1	Ls
Excalibur_rep_c67473_197	Env. Specific														8.721	1												1	Ls
Excalibur_rep_c68017_140	Env. Specific														8.721	1												1	Ls
Excalibur_rep_c68017_636	Env. Specific														8.721	1												1	Ls
GENE-0120_397	Env. Specific																			7.541							1	1	Yr
GENE-0120_431	Env. Specific																			7.541							1	1	Yr
GENE-0223_239	Env. Specific																								6.723		1	1	Yr
GENE-0480_265	Env. Specific						7.249				1									8.877							1	2	Lr & Yr
GENE-1028_694	Env. Specific																									10.209	1	1	Yr
GENE-1181_262	Env. Specific																									10.209	1	1	Yr
GENE-1181_694	Env. Specific																									10.209	1	1	Yr
GENE-1319_146	Env. Specific																									10.209	1	1	Yr
GENE-1342_238	Env. Specific																									10.209	1	1	Yr
GENE-2601_393	Env. Specific																									9.33	1	1	Yr
GENE-3111_152	Env. Specific																			7.903							1	1	Yr
GENE-3129_828	Env. Specific																					9.723					1	1	Yr
GENE-3129_890	Env. Specific																					10.437					1	1	Yr
GENE-3155_15	Env. Specific														8.721	1												1	Ls
GENE-3155_183	Env. Specific														8.721	1												1	Ls
GENE-3206_154	Env. Specific														8.721	1												1	Ls
GENE-3206_268	Env. Specific														8.721	1												1	Ls
GENE-3310_647	Env. Specific														8.721	1												1	Ls
GENE-3466_653	Env. Specific														8.721	1												1	Ls
GENE-3575_1073	Env. Specific														8.721	1												1	Ls
GENE-3639_127	Env. Specific														8.721	1												1	Ls
GENE-3641_40	Env. Specific														8.721	1												1	Ls
GENE-3780_131	Env. Specific																									6.885	1	1	Yr
GENE-3849_389	Env. Specific																			7.259							1	1	Yr
GENE-4139_155	Env. Specific														8.721	1												1	Ls
GENE-4376_439	Env. Specific							7.383			1																	1	Lr
GENE-4579_458	Env. Specific														8.721	1												1	Ls
IAAV1592	Env. Specific																			8.786							1	1	Yr
IAAV1826	Env. Specific														8.721	1												1	Ls
IAAV2077	Env. Specific														8.721	1												1	Ls
IAAV3567	Env. Specific																			9.375							1	1	Yr
IAAV3804	Env. Specific														8.721	1												1	Ls
IAAV4110	Env. Specific														8.721	1												1	Ls
IAAV4238	Env. Specific							8.991			1																	1	Lr
IAAV5065	Env. Specific		8.148		1										9.791	1												2	Cb & Ls
IAAV5087	Env. Specific																			8.786							1	1	Yr
IAAV5811	Env. Specific														8.721	1												1	Ls
IAAV6078	Env. Specific														8.721	1												1	Ls
IAAV6190	Env. Specific																									6.802	1	1	Yr
IAAV6298	Env. Specific														8.721	1												1	Ls
IAAV6424	Env. Specific																		6.704								1	1	Yr
IAAV6876	Env. Specific														8.721	1												1	Ls
IAAV7088	Env. Specific														8.721	1												1	Ls
IAAV7323	Env. Specific																				6.635						1	1	Yr
IAAV7660	Env. Specific																									6.802	1	1	Yr
IAAV7999	Env. Specific																									7.003	1	1	Yr
IAAV8169	Env. Specific														8.721	1												1	Ls
IAAV8536	Env. Specific			7.884	1																							1	Cb
IAAV8700	Env. Specific													8.172		1												1	Ls
IACX1441	Env. Specific							7.383			1																	1	Lr
IACX3426	Env. Specific									8.303	1																	1	Lr
IACX378	Env. Specific		8.535		1										6.946	1												2	Cb & Ls
IACX5859	Env. Specific														8.423	1												1	Ls
IACX5869	Env. Specific														8.721	1												1	Ls
IACX5898	Env. Specific														8.721	1												1	Ls
IACX5985	Env. Specific		8.148		1										9.791	1												2	Cb & Ls
IACX7596	Env. Specific														8.721	1												1	Ls
IACX7890	Env. Specific														8.721	1												1	Ls
IACX8298	Lr overall env.					7.928				9.921	2																	2	Lr
IACX8389	Env. Specific														8.721	1												1	Ls
IACX8947	Lr overall env.					9.293		7.3		11.598	3																	3	Lr
IACX9205	Env. Specific																				6.722						1	1	Yr
IACX9371	Env. Specific														8.721	1												1	Ls
IACX9571	Env. Specific														8.721	1												1	Ls
Jagger_c2212_120	Env. Specific														8.721	1												1	Ls
Jagger_c4653_122	Env. Specific														8.721	1												1	Ls
Jagger_c6390_111	Env. Specific														8.721	1												1	Ls
Jagger_c750_276	Env. Specific														8.721	1												1	Ls
JD_c10643_840	Env. Specific									7.094	1																	1	Lr
JD_c1752_970	Cb overall env.	8.548	10.193		2																							2	Cb
JD_c6094_241	Env. Specific														8.721	1												1	Ls
JD_c61555_640	Env. Specific														8.721	1												1	Ls
JD_c9613_220	Env. Specific														8.721	1												1	Ls
Ku_c108793_228	Lr overall env.					7.097	7.812				2																	2	Lr
Ku_c11466_1414	Env. Specific			7.884	1																							1	Cb
Ku_c15213_388	Env. Specific														8.423	1												1	Ls
Ku_c22875_172	Env. Specific																			6.671							1	1	Yr
Ku_c25974_191	Env. Specific																									6.777	1	1	Yr
Ku_c26916_669	Env. Specific						7.071				1																	1	Lr
Ku_c28054_204	Env. Specific														8.721	1												1	Ls
Ku_c2972_1754	Cb overall env.	10.356	11.497		2										7.602	1												3	Cb & Ls
Ku_c3647_2429	Env. Specific																			9.375							1	1	Yr
Ku_c3647_769	Env. Specific																			9.375							1	1	Yr
Ku_c5281_344	Env. Specific														8.721	1												1	Ls
Kukri_c100292_597	Env. Specific														8.721	1												1	Ls
Kukri_c10749_489	Env. Specific													7.14		1												1	Ls
Kukri_c11325_337	Env. Specific									9.096	1																	1	Lr
Kukri_c12117_134	Lr overall env.					7.928				9.921	2																	2	Lr
Kukri_c12317_1332	Env. Specific																			7.196							1	1	Yr
Kukri_c12317_179	Env. Specific																			7.259							1	1	Yr
Kukri_c12317_336	Env. Specific																			7.259							1	1	Yr
Kukri_c13045_302	Cb overall env.	6.961			1																							1	Cb
Kukri_c13590_137	Env. Specific														8.721	1												1	Ls
Kukri_c13590_206	Env. Specific														8.721	1												1	Ls
Kukri_c13590_344	Env. Specific														8.721	1												1	Ls
Kukri_c14245_895	Env. Specific														8.721	1												1	Ls
Kukri_c14611_315	Env. Specific																									10.209	1	1	Yr
Kukri_c1526_616	Env. Specific		6.804		1																							1	Cb
Kukri_c17876_165	Env. Specific														8.721	1												1	Ls
Kukri_c19466_231	Env. Specific																								7.231		1	1	Yr
Kukri_c20258_161	Env. Specific																						7.343				1	1	Yr
Kukri_c21087_79	Lr overall env.					7.928				9.921	2																	2	Lr
Kukri_c21405_2131	Env. Specific																				6.762						1	1	Yr
Kukri_c22631_462	Env. Specific														8.721	1												1	Ls
Kukri_c22925_185	Env. Specific														9.395	1												1	Ls
Kukri_c23354_369	Env. Specific			6.913	1																							1	Cb
Kukri_c24795_552	Env. Specific																									9.666	1	1	Yr
Kukri_c25702_948	Env. Specific									8.813	1																	1	Lr
Kukri_c25831_1365	Env. Specific									8.303	1																	1	Lr
Kukri_c26137_300	Env. Specific														8.721	1												1	Ls
Kukri_c26263_2071	Env. Specific														8.721	1												1	Ls
Kukri_c26289_1242	Env. Specific														8.721	1												1	Ls
Kukri_c26289_337	Env. Specific														8.721	1												1	Ls
Kukri_c29470_185	Env. Specific																			7.259							1	1	Yr
Kukri_c31301_178	Env. Specific														8.721	1												1	Ls
Kukri_c31301_895	Env. Specific														8.721	1												1	Ls
Kukri_c32845_116	Env. Specific																					8.787					1	1	Yr
Kukri_c35451_437	Env. Specific			8.087	1																							1	Cb
Kukri_c36638_192	Env. Specific														8.721	1												1	Ls
Kukri_c40204_141	Env. Specific																					7.035		6.582			2	2	Yr
Kukri_c4054_494	Env. Specific														8.721	1												1	Ls
Kukri_c40734_179	Lr overall env.					7.166			6.562		2																	2	Lr
Kukri_c42165_484	Env. Specific														8.721	1												1	Ls
Kukri_c42354_263	Env. Specific		6.718		1																							1	Cb
Kukri_c45015_145	Env. Specific																				6.825						1	1	Yr
Kukri_c45015_363	Env. Specific																				6.825						1	1	Yr
Kukri_c4563_455	Env. Specific																									8.102	1	1	Yr
Kukri_c46126_851	Env. Specific														8.721	1												1	Ls
Kukri_c51781_306	Env. Specific																								7.759		1	1	Yr
Kukri_c52614_291	Env. Specific																									7.003	1	1	Yr
Kukri_c5281_991	Env. Specific														8.721	1												1	Ls
Kukri_c55310_94	Env. Specific		6.64		1																							1	Cb
Kukri_c55341_290	Env. Specific									8.303	1																	1	Lr
Kukri_c55914_256	Env. Specific														8.721	1												1	Ls
Kukri_c6148_74	Env. Specific														8.721	1												1	Ls
Kukri_c65610_572	Env. Specific							7.12			1																	1	Lr
Kukri_c66626_288	Env. Specific									6.567	1																	1	Lr
Kukri_c6907_175	Env. Specific														8.721	1												1	Ls
Kukri_c693_87	Env. Specific									6.955	1																	1	Lr
Kukri_c7306_187	Env. Specific														8.721	1												1	Ls
Kukri_c7760_1210	Env. Specific														8.721	1												1	Ls
Kukri_c7874_1096	Env. Specific														8.721	1												1	Ls
Kukri_c8237_1883	Env. Specific														8.721	1												1	Ls
Kukri_c8237_1973	Env. Specific														8.721	1												1	Ls
Kukri_c8983_459	Env. Specific														8.721	1												1	Ls
Kukri_c92151_216	Env. Specific																					8.587					1	1	Yr
Kukri_c96774_58	Env. Specific		7.309		1																							1	Cb
Kukri_rep_c101366_333	Env. Specific																									10.209	1	1	Yr
Kukri_rep_c101874_104	Env. Specific																									9.901	1	1	Yr
Kukri_rep_c103261_918	Env. Specific																					6.586					1	1	Yr
Kukri_rep_c103282_216	Env. Specific														9.855	1												1	Ls
Kukri_rep_c108194_232	Env. Specific													8.002		1												1	Ls
Kukri_rep_c109098_132	Env. Specific									8.215	1																	1	Lr
Kukri_rep_c112440_422	Lr overall env.					6.96					1																	1	Lr
Kukri_rep_c115341_118	Env. Specific																									8.755	1	1	Yr
Kukri_rep_c68693_86	Cb overall env.	6.608			1																							1	Cb
Kukri_rep_c69177_180	Env. Specific																					6.586					1	1	Yr
Kukri_rep_c69786_647	Env. Specific														8.721	1												1	Ls
Kukri_rep_c70220_288	Env. Specific														8.721	1												1	Ls
Kukri_rep_c72756_155	Env. Specific		6.64		1																							1	Cb
Kukri_rep_c72773_882	Env. Specific														8.721	1												1	Ls
Kukri_rep_c78086_735	Env. Specific														8.721	1												1	Ls
Kukri_rep_c82871_181	Env. Specific																									6.777	1	1	Yr
Lr34_wMAS000004	Yr overall env.									6.791	1						8.646	10.988	11.339						9.325		4	5	Lr & Yr
Ra_c105075_272	Env. Specific																									7.003	1	1	Yr
Ra_c2139_967	Env. Specific																			8.786							1	1	Yr
Ra_c2139_968	Env. Specific																			8.786							1	1	Yr
Ra_c3019_1333	Env. Specific																									6.802	1	1	Yr
Ra_c3019_950	Env. Specific																									6.802	1	1	Yr
Ra_c58279_684	Ls overall env.											6.656				1												1	Ls
Ra_c58279_702	Ls overall env.											6.656				1												1	Ls
Ra_c698_1987	Env. Specific																			9.425							1	1	Yr
Ra_c69906_620	Env. Specific																									9.714	1	1	Yr
RAC875_c102223_220	Env. Specific																			8.039							1	1	Yr
RAC875_c1125_578	Env. Specific																									8.736	1	1	Yr
RAC875_c13610_1599	Env. Specific																				6.793						1	1	Yr
RAC875_c15109_106	Env. Specific																				6.97						1	1	Yr
RAC875_c15245_431	Env. Specific																									7.003	1	1	Yr
RAC875_c15681_1839	Env. Specific																			7.259							1	1	Yr
RAC875_c15695_487	Env. Specific							7.573			1								6.771						7.476		2	3	Lr & Yr
RAC875_c15929_628	Env. Specific														8.721	1												1	Ls
RAC875_c15929_925	Env. Specific														8.721	1												1	Ls
RAC875_c16697_1502	Env. Specific																									7.057	1	1	Yr
RAC875_c18129_2491	Cb overall env.	6.721		6.827	2																							2	Cb
RAC875_c20226_454	Env. Specific																									6.802	1	1	Yr
RAC875_c22886_235	Env. Specific						7.427	7.236			2																	2	Lr
RAC875_c2300_1021	Env. Specific																	6.81									1	1	Yr
RAC875_c24545_59	Env. Specific																									7.003	1	1	Yr
RAC875_c259_1339	Env. Specific																				6.902						1	1	Yr
RAC875_c2682_840	Env. Specific									7.044	1																	1	Lr
RAC875_c27959_117	Env. Specific														8.721	1												1	Ls
RAC875_c29314_291	Env. Specific																					7.83					1	1	Yr
RAC875_c30148_90	Env. Specific																									6.777	1	1	Yr
RAC875_c32587_186	Env. Specific														8.721	1												1	Ls
RAC875_c33738_654	Env. Specific														8.721	1												1	Ls
RAC875_c34509_124	Env. Specific																									10.209	1	1	Yr
RAC875_c34910_173	Env. Specific														8.721	1												1	Ls
RAC875_c35819_165	Env. Specific			7.019	1																							1	Cb
RAC875_c36213_352	Yr overall env.																8.263		7.572		8.06						3	3	Yr
RAC875_c37540_583	Lr overall env.					7.966		6.883		11.689	3																	3	Lr
RAC875_c37871_249	Env. Specific																				6.841						1	1	Yr
RAC875_c43002_382	Env. Specific							6.631			1																	1	Lr
RAC875_c43902_315	Env. Specific																									9.714	1	1	Yr
RAC875_c48025_483	Env. Specific																	8.098									1	1	Yr
RAC875_c49220_125	Env. Specific														8.721	1												1	Ls
RAC875_c4965_264	Env. Specific																									9.714	1	1	Yr
RAC875_c52809_168	Env. Specific														8.721	1												1	Ls
RAC875_c52856_250	Lr overall env.					6.996				7.801	2																	2	Lr
RAC875_c5569_548	Env. Specific																									6.802	1	1	Yr
RAC875_c56512_68	Env. Specific																									7.91	1	1	Yr
RAC875_c58060_75	Env. Specific																			7.259							1	1	Yr
RAC875_c58425_110	Env. Specific																				6.722						1	1	Yr
RAC875_c58476_70	Env. Specific																									7.588	1	1	Yr
RAC875_c59661_500	Env. Specific																									6.802	1	1	Yr
RAC875_c60520_164	Env. Specific														8.721	1												1	Ls
RAC875_c68079_214	Env. Specific																									9.33	1	1	Yr
RAC875_c68398_75	Env. Specific																			7.259							1	1	Yr
RAC875_c7486_1667	Env. Specific														8.423	1												1	Ls
RAC875_c7778_887	Env. Specific																									7.526	1	1	Yr
RAC875_c7956_234	Env. Specific																					6.835					1	1	Yr
RAC875_c8115_2703	Env. Specific																									6.802	1	1	Yr
RAC875_c8754_1225	Env. Specific									8.303	1																	1	Lr
RAC875_c97163_563	Env. Specific														8.721	1												1	Ls
RAC875_rep_c104133_1757	Env. Specific			8.087	1																							1	Cb
RAC875_rep_c106651_490	Env. Specific																			7.259							1	1	Yr
RAC875_rep_c106651_635	Env. Specific																			7.259							1	1	Yr
RAC875_rep_c69917_755	Lr overall env.					6.96					1																	1	Lr
RAC875_rep_c72158_2056	Env. Specific																						10.937				1	1	Yr
RAC875_rep_c74366_489	Env. Specific																									7.003	1	1	Yr
RAC875_rep_c76630_63	Env. Specific														8.721	1												1	Ls
RAC875_rep_c77197_202	Env. Specific																				6.936						1	1	Yr
RAC875_s118740_182	Env. Specific													8.657		1												1	Ls
RFL_Contig1152_2659	Env. Specific													7.444		1												1	Ls
RFL_Contig2324_729	Env. Specific						7.519				1																	1	Lr
RFL_Contig2364_754	Env. Specific																									6.802	1	1	Yr
RFL_Contig2885_1150	Env. Specific														8.721	1												1	Ls
RFL_Contig4977_2333	Env. Specific																			7.692							1	1	Yr
RFL_Contig79_332	Env. Specific														8.721	1												1	Ls
TA001351-1193	Env. Specific																									10.209	1	1	Yr
TA002254-0660	Env. Specific																	7.241									1	1	Yr
TA002473-0717	Env. Specific																					10.556					1	1	Yr
TA003025-1611	Lr overall env.					7.928				9.921	2																	2	Lr
TA003589-0518	Env. Specific			7.601	1																							1	Cb
TA003701-0787	Env. Specific									8.303	1																	1	Lr
TA004758-0291	Env. Specific														6.53	1												1	Ls
TA006348-0950	Env. Specific			7.019	1																							1	Cb
TA011854-0699	Env. Specific																									10.209	1	1	Yr
Tdurum_contig14090_195	Env. Specific														8.849	1												1	Ls
Tdurum_contig16445_218	Env. Specific									6.567	1																	1	Lr
Tdurum_contig16445_240	Env. Specific									6.567	1																	1	Lr
Tdurum_contig16797_148	Ls overall env.											6.642				1												1	Ls
Tdurum_contig16865_174	Yr overall env.																7.019			10.671				8.191	6.62		4	4	Yr
Tdurum_contig19022_1524	Env. Specific																			7.259							1	1	Yr
Tdurum_contig19022_1555	Env. Specific																			7.259							1	1	Yr
Tdurum_contig25895_484	Env. Specific																			7.259							1	1	Yr
Tdurum_contig27887_55	Env. Specific																									10.209	1	1	Yr
Tdurum_contig28482_427	Env. Specific		7.104		1										8.886	1												2	Cb & Ls
Tdurum_contig32719_216	Env. Specific																									7.082	1	1	Yr
Tdurum_contig35073_183	Env. Specific																									15.689	1	1	Yr
Tdurum_contig42016_333	Env. Specific																			6.746							1	1	Yr
Tdurum_contig42638_383	Env. Specific																									8.701	1	1	Yr
Tdurum_contig4937_234	Env. Specific																			7.259							1	1	Yr
Tdurum_contig66023_89	Env. Specific																			6.746							1	1	Yr
Tdurum_contig68339_71	Env. Specific																			7.259							1	1	Yr
Tdurum_contig76683_147	Env. Specific																			7.131							1	1	Yr
Tdurum_contig8365_319	Env. Specific																									8.195	1	1	Yr
Tdurum_contig85377_141	Env. Specific									6.567	1																	1	Lr
Tdurum_contig8840_237	Env. Specific							7.37			1																	1	Lr
Tdurum_contig89487_388	Env. Specific																			7.259							1	1	Yr
Tdurum_contig93706_108	Env. Specific																			7.196							1	1	Yr
Tdurum_contig93706_390	Env. Specific																			7.259							1	1	Yr
Tdurum_contig93706_517	Env. Specific																			7.259							1	1	Yr
tplb0032i02_1127	Env. Specific																	7.935									1	1	Yr
tplb0049b14_1104	Env. Specific														8.721	1												1	Ls
tplb0049b14_1542	Env. Specific														8.721	1												1	Ls
tplb0050e20_730	Lr overall env.					7.166			6.562		2																	2	Lr
tplb0053e09_1284	Cb overall env.	6.577			1																							1	Cb
tplb0058c02_1053	Env. Specific														9.16	1												1	Ls
tplb0060m15_1174	Env. Specific														8.721	1												1	Ls
wsnp_BE497160D_Ta_2_1	Env. Specific		8.535		1										6.946	1												2	Cb & Ls
wsnp_BE499546B_Ta_2_1	Yr overall env.																10.216	6.941	8.866		7.636			7.027			5	5	Yr
wsnp_BE499835B_Ta_2_5	Env. Specific														6.847	1												1	Ls
wsnp_BF474606A_Td_2_1	Env. Specific																			8.786							1	1	Yr
wsnp_BG274294B_Ta_2_3	Lr overall env.					6.629	7.545				2																	2	Lr
wsnp_CAP11_c1787_968410	Env. Specific																									10.209	1	1	Yr
wsnp_CAP11_c68_106078	Env. Specific																				6.721						1	1	Yr
wsnp_CAP12_c15_9559	Env. Specific																				6.721						1	1	Yr
wsnp_CAP12_c303_168418	Env. Specific														8.721	1												1	Ls
wsnp_CAP12_c303_168436	Env. Specific														8.721	1												1	Ls
wsnp_Ex_c11106_18003332	Env. Specific							7.147			1																	1	Lr
wsnp_Ex_c11141_18047244	Env. Specific														8.721	1												1	Ls
wsnp_Ex_c11893_19077166	Lr overall env.					6.96					1																	1	Lr
wsnp_Ex_c12219_19526749	Env. Specific																				6.825						1	1	Yr
wsnp_Ex_c13485_21225504	Env. Specific		8.911		1																							1	Cb
wsnp_Ex_c16551_25060833	Env. Specific																			8.786							1	1	Yr
wsnp_Ex_c16551_25061517	Env. Specific																			8.786							1	1	Yr
wsnp_Ex_c18499_27344859	Env. Specific																							6.818			1	1	Yr
wsnp_Ex_c19519_28487129	Env. Specific														8.721	1												1	Ls
wsnp_Ex_c2224_4171319	Env. Specific														8.721	1												1	Ls
wsnp_Ex_c2224_4171424	Env. Specific														8.721	1												1	Ls
wsnp_Ex_c24376_33619527	Lr overall env.					6.826		7.262			2																	2	Lr
wsnp_Ex_c2536_4728768	Env. Specific																									6.777	1	1	Yr
wsnp_Ex_c25392_34658803	Env. Specific														8.721	1												1	Ls
wsnp_Ex_c25409_34677674	Env. Specific																									6.802	1	1	Yr
wsnp_Ex_c25730_34991010	Env. Specific							7.147			1																	1	Lr
wsnp_Ex_c2592_4822528	Env. Specific																									7.003	1	1	Yr
wsnp_Ex_c25926_35188395	Env. Specific														8.721	1												1	Ls
wsnp_Ex_c25926_35188479	Env. Specific														8.721	1												1	Ls
wsnp_Ex_c26312_35558700	Env. Specific														8.721	1												1	Ls
wsnp_Ex_c33420_41911147	Env. Specific																									6.777	1	1	Yr
wsnp_Ex_c3603_6584235	Env. Specific																								6.538		1	1	Yr
wsnp_Ex_c3695_6740339	Env. Specific																				7.823						1	1	Yr
wsnp_Ex_c4031_7293125	Env. Specific														8.721	1												1	Ls
wsnp_Ex_c42970_49408553	Env. Specific									8.778	1																	1	Lr
wsnp_Ex_c46274_51831129	Env. Specific							7.383			1																	1	Lr
wsnp_Ex_c4774_8519623	Env. Specific																									7.803	1	1	Yr
wsnp_Ex_c48257_53217539	Env. Specific														7.191	1												1	Ls
wsnp_Ex_c52086_55808126	Env. Specific													7.315		1												1	Ls
wsnp_Ex_c52086_55808193	Env. Specific													7.315		1												1	Ls
wsnp_Ex_c5412_9564346	Ls overall env.											6.656				1												1	Ls
wsnp_Ex_c5412_9564478	Ls overall env.											6.656				1												1	Ls
wsnp_Ex_c5412_9564550	Ls overall env.											6.656				1												1	Ls
wsnp_Ex_c5412_9565527	Ls overall env.											6.656				1												1	Ls
wsnp_Ex_c64005_62986957	Lr overall env.					6.96					1																	1	Lr
wsnp_Ex_c65091_63634826	Lr overall env.					7.166			6.562		2																	2	Lr
wsnp_Ex_c7246_12443506	Env. Specific												7.166			1												1	Ls
wsnp_Ex_c9846_16236003	Env. Specific														8.721	1												1	Ls
wsnp_Ex_rep_c67621_66275106	Env. Specific																									6.777	1	1	Yr
wsnp_Ex_rep_c67645_66305241	Lr overall env.					6.96					1																	1	Lr
wsnp_Ex_rep_c68017_66762485	Env. Specific														8.721	1												1	Ls
wsnp_Ex_rep_c68033_66780978	Env. Specific														8.721	1												1	Ls
wsnp_Ex_rep_c69766_68723140	Env. Specific																			7.758							1	1	Yr
wsnp_Ex_rep_c70959_69813693	Env. Specific																									7.36	1	1	Yr
wsnp_JD_c12186_12484832	Env. Specific														8.721	1												1	Ls
wsnp_JD_c23569_20105699	Env. Specific														8.721	1												1	Ls
wsnp_JD_c3181_4176512	Env. Specific																				8.802						1	1	Yr
wsnp_JD_c6331_7499499	Env. Specific																			6.649							1	1	Yr
wsnp_JD_c7507_8592496	Env. Specific														8.721	1												1	Ls
wsnp_JD_c9613_10432955	Env. Specific														8.721	1												1	Ls
wsnp_Ku_c11466_18716865	Env. Specific			8.023	1																							1	Cb
wsnp_Ku_c13640_21686670	Ls overall env.											7.273				1												1	Ls
wsnp_Ku_c17017_26019611	Env. Specific																					6.584					1	1	Yr
wsnp_Ku_c17177_26216230	Cb overall env.	7.133		8.004	2																							2	Cb
wsnp_Ku_c1818_3557408	Cb overall env.	6.944		7.086	2																							2	Cb
wsnp_Ku_c18538_27857915	Env. Specific			6.87	1																							1	Cb
wsnp_Ku_c23096_32987510	Env. Specific																			7.367							1	1	Yr
wsnp_Ku_c24804_34773820	Env. Specific														8.721	1												1	Ls
wsnp_Ku_c3907_7157334	Env. Specific																									7.003	1	1	Yr
wsnp_Ku_rep_c68793_67937879	Env. Specific														8.721	1												1	Ls
wsnp_Ku_rep_c70220_69775367	Env. Specific														8.721	1												1	Ls
wsnp_Ku_rep_c70914_70584971	Env. Specific														8.721	1												1	Ls
wsnp_Ra_c18873_27993835	Env. Specific								6.821		1																	1	Lr
wsnp_Ra_c24619_34168104	Env. Specific														9.11	1												1	Ls
wsnp_Ra_c30792_40014791	Env. Specific														8.721	1												1	Ls
wsnp_Ra_c46527_52361888	Lr overall env.					7.166			6.562		2																	2	Lr
wsnp_Ra_c5131_9153817	Env. Specific														8.721	1												1	Ls
wsnp_Ra_rep_c70152_67862271	Env. Specific														8.423	1												1	Ls
wsnp_Ra_rep_c71101_69119989	Env. Specific							7.383			1																	1	Lr
wsnp_Ra_rep_c71290_69343893	Env. Specific												6.904			1												1	Ls
Count of SNPs		13	28	19	52	34	16	18	6	45	84	12	6	9	219	245	7	12	8	55	25	15	2	7	8	82	199	560

## Sheet: Table S6C
C) Summary of the 66 SNPs significantly associated with the combined disease scores of all environments
Marker	Chr (IWGSC RefSeq v2.0)	Position (bp) (IWGSC RefSeq v2.0)	Position (Mb) IWGSC RefSeq v2.0)	Region	QTL name	Bunt	Lr	Ls	Yr	Count	Chr (IWGSC RefSeq v1.0)	Position (bp) (IWGSC RefSeq v1.0	Chrom based on IWGSC RefSeq v1.0 vs. IWGSC RefSeq v2.0	Position based on IWGSC RefSeq v1.0 vs. IWGSC RefSeq v2.0
wsnp_Ku_c1818_3557408	1A	4383342	4.38334	Reg-01	QCbt.dms-1A.1	6.944				1	1A	3390351	The same chrom	992991
wsnp_Ku_c17177_26216230	1A	13371025	13.371	Reg-02	QCbt.dms-1A.2	7.133				1	1A	11942481	The same chrom	1428544
BobWhite_c685_1231	1A	14027876	14.0279	Reg-02	QCbt.dms-1A.2	7.27				1	1A	12590251	The same chrom	1437625
CAP11_c6406_71	1A	556873095	556.873	Reg-03	QCbt.dms-1A.3	7.415				1	1A	554889518	The same chrom	1983577
Excalibur_c16851_835	1B	18203933	18.2039	Reg-04	QLs.dms-1B			6.564		1	1B	17383825	The same chrom	820108
Tdurum_contig16865_174	1B	540583488	540.583	Reg-05	QYr.dms-1B				7.019	1	1B	533963879	The same chrom	6619609
BS00066006_51	1B	547332148	547.332	Reg-06	QLr.dms-1B		8.535			1	1B	540726745	The same chrom	6605403
Excalibur_c40993_1129	1B	547335426	547.335	Reg-06	QLr.dms-1B		7.411			1	1B	540730023	The same chrom	6605403
Excalibur_c21451_352	1B	547487795	547.488	Reg-06	QLr.dms-1B		7.411			1	1B	540847896	The same chrom	6639899
wsnp_BG274294B_Ta_2_3	1B	549647134	549.647	Reg-06	QLr.dms-1B		6.629			1	1B	543012537	The same chrom	6634597
tplb0053e09_1284	1B	645251547	645.252	Reg-07	QCbt.dms-1B	6.577				1	1B	638015656	The same chrom	7235891
Kukri_rep_c68693_86	1D	10669243	10.6692	Reg-08	QCbt.dms-1D	6.608				1	1D	10259677	The same chrom	409566
Excalibur_rep_c110303_320	2A	19019241	19.0192	Reg-09	QLs.dms-2A.1			7.919		1	2A	15954221	The same chrom	3065020
Ra_c58279_684	2A	45928136	45.9281	Reg-10	QLs.dms-2A.2			6.656		1	2B	63292332	Different chrom.	NA
Ra_c58279_702	2A	45928154	45.9282	Reg-10	QLs.dms-2A.2			6.656		1	2A	41232514	The same chrom	4695640
wsnp_Ex_c5412_9565527	2A	45928218	45.9282	Reg-10	QLs.dms-2A.2			6.656		1	2A	41232578	The same chrom	4695640
wsnp_Ex_c5412_9564550	2A	45931727	45.9317	Reg-10	QLs.dms-2A.2			6.656		1	2A	41236089	The same chrom	4695638
wsnp_Ex_c5412_9564478	2A	45931779	45.9318	Reg-10	QLs.dms-2A.2			6.656		1	2A	41236141	The same chrom	4695638
wsnp_Ex_c5412_9564346	2A	45932241	45.9322	Reg-10	QLs.dms-2A.2			6.656		1	2A	41236603	The same chrom	4695638
Kukri_c21087_79	2A	758316082	758.316	Reg-11	QLr.dms-2A		7.928			1	2B	764822952	Different chrom.	NA
BS00065556_51	2B	19530481	19.5305	Reg-12	QLs.dms-2B			7.431		1	2B	17456965	The same chrom	2073516
BobWhite_c18540_351	2B	690898021	690.898	Reg-13	QLr.dms-2B.1		6.678			1	2D	570948431	Different chrom.	NA
Excalibur_c62234_105	2B	771850360	771.85	Reg-14	QLr.dms-2B.2		8.966			1	2B	762709794	The same chrom	9140566
BobWhite_c10864_436	2B	772753794	772.754	Reg-14	QLr.dms-2B.2		7.928			1	2B	763631845	The same chrom	9121949
TA003025-1611	2B	772753941	772.754	Reg-14	QLr.dms-2B.2		7.928			1	2A	753539803	Different chrom.	NA
BS00084417_51	2B	772755069	772.755	Reg-14	QLr.dms-2B.2		7.928			1	2B	763633120	The same chrom	9121949
Excalibur_c63327_110	2B	772962976	772.963	Reg-14	QLr.dms-2B.2		7.928			1	2B	763842416	The same chrom	9120560
BS00079941_51	2B	773186569	773.187	Reg-14	QLr.dms-2B.2		7.928			1	2B	764074052	The same chrom	9112517
IACX8298	2B	773186624	773.187	Reg-14	QLr.dms-2B.2		7.928			1	2B	764074107	The same chrom	9112517
BobWhite_c17767_396	2B	773230151	773.23	Reg-14	QLr.dms-2B.2		7.928			1	2B	764117633	The same chrom	9112518
Kukri_c12117_134	2B	774012953	774.013	Reg-14	QLr.dms-2B.2		7.928			1	2B	764902401	The same chrom	9110552
RAC875_c37540_583	2B	778230186	778.23	Reg-14	QLr.dms-2B.2		7.966			1	2B	769072296	The same chrom	9157890
BS00012463_51	2B	811019075	811.019	Reg-15	QCbt.dms-2B	7.061				1	2B	795065724	The same chrom	15953351
BS00086533_51	2B	812244914	812.245	Reg-16	QYr.dms-2B				7.432	1	2B	794050908	The same chrom	18194006
RAC875_c52856_250	2D	624625220	624.625	Reg-17	QLr.dms-2D		6.996			1	2A	753420479	Different chrom.	NA
Excalibur_c10441_984	2D	624831634	624.832	Reg-17	QLr.dms-2D		9.293			1	2B	763630872	Different chrom.	NA
BobWhite_s66737_344	2D	624833916	624.834	Reg-17	QLr.dms-2D		6.697			1	2D	621846255	The same chrom	2987661
IACX8947	2D	624952145	624.952	Reg-17	QLr.dms-2D		9.293			1	2D	621964754	The same chrom	2987391
Excalibur_c224_1383	2D	624952858	624.953	Reg-17	QLr.dms-2D		9.293			1	2D	621965467	The same chrom	2987391
Ku_c2972_1754	3A	10279544	10.2795	Reg-18	QCbt.dms-3A.1	10.356				1	3B	6677392	Different chrom.	NA
Ku_c108793_228	3A	51644908	51.6449	Reg-19	QLr.dms-3A		7.097			1	3B	63112422	Different chrom.	NA
JD_c1752_970	3A	671290927	671.291	Reg-20	QCbt.dms-3A.2	8.548				1	3D	535782385	Different chrom.	NA
Tdurum_contig16797_148	3B	557835101	557.835	Reg-21	QLs.dms-3B			6.642		1	3B	542644180	The same chrom	15190921
CAP7_c10624_88	3B	616148037	616.148	Reg-22	QLr.dms-3B.1		6.561			1	3B	601120537	The same chrom	15027500
wsnp_Ex_c64005_62986957	3B	743632624	743.633	Reg-23	QLr.dms-3B.2		6.96			1	3B	728919347	The same chrom	14713277
Kukri_rep_c112440_422	3B	743633086	743.633	Reg-23	QLr.dms-3B.2		6.96			1	3D	549515358	Different chrom.	NA
wsnp_Ex_c11893_19077166	3B	743633965	743.634	Reg-23	QLr.dms-3B.2		6.96			1	3B	728920688	The same chrom	14713277
RAC875_rep_c69917_755	3B	743922021	743.922	Reg-23	QLr.dms-3B.2		6.96			1	3B	729209425	The same chrom	14712596
wsnp_Ex_rep_c67645_66305241	3D	550280985	550.281	Reg-24	QLr.dms-3D		6.96			1	3B	728919659	Different chrom.	NA
wsnp_Ku_c13640_21686670	4A	580845356	580.845	Reg-25	QLs.dms-4A			7.273		1	4A	581940789	The same chrom	-1095433
wsnp_BE499546B_Ta_2_1	4B	638809518	638.81	Reg-27	QYr.dms-4B				10.216	1	4B	639844869	The same chrom	-1035351
RAC875_c36213_352	4B	638812344	638.812	Reg-27	QYr.dms-4B				8.263	1	4B	639847695	The same chrom	-1035351
Excalibur_c49297_159	4B	638813440	638.813	Reg-27	QYr.dms-4B				8.272	1	4B	639848791	The same chrom	-1035351
wsnp_Ex_c65091_63634826	5A	331454313	331.454	Reg-28	QLr.dms-5A.1		7.166			1	5B	281640033	Different chrom.	NA
wsnp_Ra_c46527_52361888	5A	331884318	331.884	Reg-28	QLr.dms-5A.1		7.166			1	5D	247613311	Different chrom.	NA
BobWhite_c28958_178	5A	338666459	338.666	Reg-29	QLr.dms-5A.2		6.809			1	5B	287797071	Different chrom.	NA
Excalibur_c11045_236	5A	547615657	547.616	Reg-30	QYr.dms-5A				7.355	1	5A	547042483	The same chrom	573174
Kukri_c40734_179	5B	281176164	281.176	Reg-31	QLr.dms-5B		7.166			1	5B	278106755	The same chrom	3069409
tplb0050e20_730	5B	284717655	284.718	Reg-31	QLr.dms-5B		7.166			1	5B	281634822	The same chrom	3082833
Kukri_c13045_302	5D	244100829	244.101	Reg-32	QCbt.dms-5D.1	6.961				1	5D	241250946	The same chrom	2849883
BobWhite_c21345_121	5D	565867455	565.867	Reg-33	QCbt.dms-5D.2	6.609				1	5D	558949757	The same chrom	6917698
D_contig17056_55	6D	7431984	7.43198	Reg-34	QCbt.dms-6D	16.891				1	6D	6966722	The same chrom	465262
RAC875_c18129_2491	7A	15774259	15.7743	Reg-35	QCbt.dms-7A	6.721				1	7A	15085981	The same chrom	688278
wsnp_Ex_c24376_33619527	7B	36162027	36.162	Reg-36	QLr.dms-7B		6.826			1	7B	33906361	The same chrom	2255666
Lr34_wMAS000004	7D	48955909	48.9559	Reg-26	QYr.dms-7D				8.646	1	7D	47418536	The same chrom	1537373
CAP7_c10430_216	7D	266720824	266.721	Reg-37	QLs.dms-7D			6.643		1	7D	264753580	The same chrom	1967244
Total						13	34	12	7

## Sheet: Table S6D
D) Summary of the 37 genomic regions associated with the combined disease scores of all environments
QTL name	No. of SNPs	IWGSC RefSeq v2.0 chrom	IWGSC RefSeq v2.0 min position (bp)	IWGSC RefSeq v2.0 max position (bp)	IWGSC RefSeq v1.0 chrom	IWGSC RefSeq v1.0 min position (bp)	IWGSC RefSeq v1.0 max position (bp)	Cb PVE	Lr (PVE)	Ls PVE	Yr PVE	Significantly associated SNPs
QCbt.dms-1A.1	1	1A	4383342	4383342	1A	3390351	3390351	6.944				wsnp_Ku_c1818_3557408
QCbt.dms-1A.2	2	1A	13371025	14027876	1A	11942481	12590251	7.2015				wsnp_Ku_c17177_26216230 and BobWhite_c685_1231
QCbt.dms-1A.3	1	1A	556873095	556873095	1A	554889518	554889518	7.415				CAP11_c6406_71
QLs.dms-1B	1	1B	18203933	18203933	1B	17383825	17383825			6.564		Excalibur_c16851_835
QYr.dms-1B	1	1B	540583488	540583488	1B	533963879	533963879				7.019	Tdurum_contig16865_174
QLr.dms-1B	4	1B	547332148	549647134	1B	540726745	543012537		7.4965			BS00066006_51, Excalibur_c40993_1129, Excalibur_c21451_352, and wsnp_BG274294B_Ta_2_3
QCbt.dms-1B	1	1B	645251547	645251547	1B	638015656	638015656	6.577				tplb0053e09_1284
QCbt.dms-1D	1	1D	10669243	10669243	1D	10259677	10259677	6.608				Kukri_rep_c68693_86
QLs.dms-2A.1	1	2A	19019241	19019241	2A	15954221	15954221			7.919		Excalibur_rep_c110303_320
QLs.dms-2A.2	6	2A	45928136	45932241	2B	41232514	63292332			6.656		Ra_c58279_684, Ra_c58279_702, wsnp_Ex_c5412_9565527, wsnp_Ex_c5412_9564550, wsnp_Ex_c5412_9564478, and wsnp_Ex_c5412_9564346
QLr.dms-2A	1	2A	758316082	758316082	2B	764822952	764822952		7.928			Kukri_c21087_79
QLs.dms-2B	1	2B	19530481	19530481	2B	17456965	17456965			7.431		BS00065556_51
QLr.dms-2B.1	1	2B	690898021	690898021	2D	570948431	570948431		6.678			BobWhite_c18540_351
QLr.dms-2B.2	10	2B	771850360	778230186	2B	753539803	769072296		8.0356			Excalibur_c62234_105, BobWhite_c10864_436, TA003025-1611, BS00084417_51, Excalibur_c63327_110, BS00079941_51, IACX8298, BobWhite_c17767_396, Kukri_c12117_134, and RAC875_c37540_583
QCbt.dms-2B	1	2B	811019075	811019075	2B	795065724	795065724	7.061				BS00012463_51
QYr.dms-2B	1	2B	812244914	812244914	2B	794050908	794050908				7.432	BS00086533_51
QLr.dms-2D	5	2D	624625220	624952858	2A	621846255	763630872		8.3144			RAC875_c52856_250, Excalibur_c10441_984, BobWhite_s66737_344, IACX8947, and Excalibur_c224_1383
QCbt.dms-3A.1	1	3A	10279544	10279544	3B	6677392	6677392	10.356				Ku_c2972_1754
QCbt.dms-3A.2	1	3A	671290927	671290927	3D	535782385	535782385	8.548				JD_c1752_970
QLr.dms-3A	1	3A	51644908	51644908	3B	63112422	63112422		7.097			Ku_c108793_228
QLs.dms-3B	1	3B	557835101	557835101	3B	542644180	542644180			6.642		Tdurum_contig16797_148
QLr.dms-3B.1	1	3B	616148037	616148037	3B	601120537	601120537		6.561			CAP7_c10624_88
QLr.dms-3B.2	4	3B	743632624	743922021	3B	549515358	729209425		6.96			wsnp_Ex_c64005_62986957, Kukri_rep_c112440_422, wsnp_Ex_c11893_19077166, and RAC875_rep_c69917_755
QLr.dms-3D	1	3D	550280985	550280985	3B	728919659	728919659		6.96			wsnp_Ex_rep_c67645_66305241
QLs.dms-4A	1	4A	580845356	580845356	4A	581940789	581940789			7.273		wsnp_Ku_c13640_21686670
QYr.dms-4B	3	4B	638809518	638813440	4B	639844869	639848791				8.917	wsnp_BE499546B_Ta_2_1, RAC875_c36213_352, and Excalibur_c49297_159
QLr.dms-5A.1	2	5A	331454313	331884318	5B	247613311	281640033		7.166			wsnp_Ex_c65091_63634826 and wsnp_Ra_c46527_52361888
QLr.dms-5A.2	1	5A	338666459	338666459	5B	287797071	287797071		6.809			BobWhite_c28958_178
QYr.dms-5A	1	5A	547615657	547615657	5A	547042483	547042483				7.355	Excalibur_c11045_236
QLr.dms-5B	2	5B	281176164	284717655	5B	278106755	281634822		7.166			Kukri_c40734_179 and tplb0050e20_730
QCbt.dms-5D.1	1	5D	244100829	244100829	5D	241250946	241250946	6.961				Kukri_c13045_302
QCbt.dms-5D.2	1	5D	565867455	565867455	5D	558949757	558949757	6.609				BobWhite_c21345_121
QCbt.dms-6D	1	6D	7431984	7431984	6D	6966722	6966722	16.891				D_contig17056_55
QCbt.dms-7A	1	7A	15774259	15774259	7A	15085981	15085981	6.721				RAC875_c18129_2491
QLr.dms-7B	1	7B	36162027	36162027	7B	33906361	33906361		6.826			wsnp_Ex_c24376_33619527
QYr.dms-7D	1	7D	48955909	48955909	7D	47418536	47418536				8.646	wMAS000004
QLs.dms-7D	1	7D	266720824	266720824	7D	264753580	264753580			6.643		CAP7_c10430_216

## Sheet: Table 6E Genes
E) List of candidate genes that map near Lr34 on chromosome 7D between 47.4-49.0 Mb
QTL	Physical Interval	Triticum aestivum genes	Location
QYr.dms-7D (wMAS000004)	7D:47412062-48955803	TraesCS7D02G080300 (TraesCS7D02G080300)	7D:47412062-47424490
QYr.dms-7D (wMAS000004)	7D:47412062-48955803	TraesCS7D02G080400 (TraesCS7D02G080400)	7D:47448134-47450294
QYr.dms-7D (wMAS000004)	7D:47412062-48955803	TraesCS7D02G080500 (TraesCS7D02G080500)	7D:47453911-47456216
QYr.dms-7D (wMAS000004)	7D:47412062-48955803	TraesCS7D02G080600 (TraesCS7D02G080600)	7D:47457550-47459790
QYr.dms-7D (wMAS000004)	7D:47412062-48955803	TraesCS7D02G080700 (TraesCS7D02G080700)	7D:47481731-47483644
QYr.dms-7D (wMAS000004)	7D:47412062-48955803	TraesCS7D02G080800 (TraesCS7D02G080800)	7D:47516381-47517081
QYr.dms-7D (wMAS000004)	7D:47412062-48955803	TraesCS7D02G080900 (TraesCS7D02G080900)	7D:47609032-47610609
QYr.dms-7D (wMAS000004)	7D:47412062-48955803	TraesCS7D02G081000 (TraesCS7D02G081000)	7D:47648753-47650483
QYr.dms-7D (wMAS000004)	7D:47412062-48955803	TraesCS7D02G081100 (TraesCS7D02G081100)	7D:47808526-47809169
QYr.dms-7D (wMAS000004)	7D:47412062-48955803	TraesCS7D02G081200 (TraesCS7D02G081200)	7D:48127878-48128325
QYr.dms-7D (wMAS000004)	7D:47412062-48955803	TraesCS7D02G081300 (TraesCS7D02G081300)	7D:48166757-48167504
QYr.dms-7D (wMAS000004)	7D:47412062-48955803	TraesCS7D02G081400 (TraesCS7D02G081400)	7D:48209842-48210287
QYr.dms-7D (wMAS000004)	7D:47412062-48955803	TraesCS7D02G081500 (TraesCS7D02G081500)	7D:48257481-48258228
QYr.dms-7D (wMAS000004)	7D:47412062-48955803	TraesCS7D02G081600 (TraesCS7D02G081600)	7D:48400185-48401333
QYr.dms-7D (wMAS000004)	7D:47412062-48955803	TraesCS7D02G081700 (TraesCS7D02G081700)	7D:48528260-48535213
QYr.dms-7D (wMAS000004)	7D:47412062-48955803	TraesCS7D02G081800 (TraesCS7D02G081800)	7D:48536356-48543423
QYr.dms-7D (wMAS000004)	7D:47412062-48955803	TraesCS7D02G081900 (TraesCS7D02G081900)	7D:48823690-48825022
QCbt.dms-6D	6D:6966722-7431984	TraesCS6D02G016500 (TraesCS6D02G016500)	6D:6963495-6970978
QCbt.dms-6D	6D:6966722-7431984	TraesCS6D02G016600 (TraesCS6D02G016600)	6D:6977348-6980077
QCbt.dms-6D	6D:6966722-7431984	TraesCS6D02G016700 (TraesCS6D02G016700)	6D:6982048-6983620
QCbt.dms-6D	6D:6966722-7431984	TraesCS6D02G016800 (TraesCS6D02G016800)	6D:7032180-7035207
QCbt.dms-6D	6D:6966722-7431984	TraesCS6D02G017000 (TraesCS6D02G017000)	6D:7094960-7098896
QCbt.dms-6D	6D:6966722-7431984	TraesCS6D02G017100 (TraesCS6D02G017100)	6D:7099573-7107559
QCbt.dms-6D	6D:6966722-7431984	TraesCS6D02G017200 (TraesCS6D02G017200)	6D:7157307-7157996
QCbt.dms-6D	6D:6966722-7431984	TraesCS6D02G017300 (TraesCS6D02G017300)	6D:7164027-7164729
QCbt.dms-6D	6D:6966722-7431984	TraesCS6D02G017400 (TraesCS6D02G017400)	6D:7209606-7212000
QCbt.dms-6D	6D:6966722-7431984	TraesCS6D02G017500 (TraesCS6D02G017500)	6D:7280447-7285137
QCbt.dms-6D	6D:6966722-7431984	TraesCS6D02G017600 (TraesCS6D02G017600)	6D:7290076-7293584
QCbt.dms-6D	6D:6966722-7431984	TraesCS6D02G017700 (TraesCS6D02G017700)	6D:7343818-7345738
QCbt.dms-6D	6D:6966722-7431984	TraesCS6D02G017800 (TraesCS6D02G017800)	6D:7357357-7358970
QCbt.dms-6D	6D:6966722-7431984	TraesCS6D02G017900 (TraesCS6D02G017900)	6D:7396394-7399570
QCbt.dms-6D	6D:6966722-7431984	TraesCS6D02G018000 (TraesCS6D02G018000)	6D:7403819-7404367
QCbt.dms-6D	6D:6966722-7431984	TraesCS6D02G018100 (TraesCS6D02G018100)	6D:7422813-7424067
